# Supplementary material
Source: MDPI journal article supplement (https://www.mdpi.com/2075-4701/13/3/592)
Supplement: s1 [file s1]

Review

# Relevance of Environmental Factors in the Steel Life Cycle for a Transition toward Circular Sustainable Production and Consumption Systems: A Joint Bibliometric and Bibliographic Analysis

Marco Casazza \* and Fabrizio Barone

Department of Medicine, Surgery and Dentistry “Scuola Medica Salernitana”, Università degli Studi di Salerno, 84081 Baronissi, Italy; fbarone@unisa.it

\* Correspondence: mcasazza@unisa.it

## S1. Reference bibliographical list

Here follows a list of references, based on a bibliographical research on Scopus (SCO) and Web of Science (WOS) databases. As reported in the second section of the paper, the first round of bibliographical research, to which the list refers, focused on the last 5 years of published literature, considered a set of 8 word groups: “steel” AND “circular economy”; “steel” AND “emission”; “steel” AND “indicator”; “steel” AND “LCA”; “steel” AND “material flow”; “steel” AND “monitoring”; “steel” AND “recycling”; “steel” AND “reuse”.

1. Chantana, J.; Nishimura, T.; Kawano, Y.; Teraji, S.; Watanabe, T.; Minemoto, T. Examination of Relationship between Urbach Energy and Open-Circuit Voltage Deficit of Flexible Cu(In,Ga)Se<sub>2</sub> Solar Cell for Its Improved Photovoltaic Performance. *ACS Applied Energy Materials* **2019**, *2*, 7843–7849, doi:10.1021/acsaem.9b01271.
2. Neyhouse, B.J.; Tenny, K.M.; Chiang, Y.-M.; Brushett, F.R. Microelectrode-Based Sensor for Measuring Operando Active Species Concentrations in Redox Flow Cells. *ACS Applied Energy Materials* **2021**, *4*, 13830–13840, doi:10.1021/acsaem.1c02580.
3. Hong, S.; Huang, H.D.; Rim, G.; Park, Y.; Park, A.-H.A. Integration of Two Waste Streams for Carbon Storage and Utilization: Enhanced Metal Extraction from Steel Slag Using Biogenic Volatile Organic Acids. *ACS Sustainable Chemistry and Engineering* **2020**, *8*, 18519–18527, doi:10.1021/acssuschemeng.0c06355.
4. Huo, J.; Bradley, W.; Podolak, K.; Ryan, B.J.; Roling, L.T.; Kraus, G.A.; Shanks, B.H. Triacetic Acid Lactone and 4-Hydroxycoumarin as Bioprivileged Molecules for the Development of Performance-Advantaged Organic Corrosion Inhibitors. *ACS Sustainable Chemistry and Engineering* **2022**, *10*, 11544–11554, doi:10.1021/acssuschemeng.2c02940.
5. Kuwahara, Y.; Hanaki, A.; Yamashita, H. Direct Synthesis of a Regenerative CaO-Fe<sub>3</sub>O<sub>4</sub>-SiO<sub>2</sub> Composite Adsorbent from Converter Slag for CO<sub>2</sub> Capture

**Citation:** Casazza, M.; Barone, F. Relevance of Environmental Factors in the Steel Life Cycle for a Transition toward Circular Sustainable Production and Consumption Systems: A Joint Bibliometric and Bibliographic Analysis. *Metals* **2023**, *13*, x, <https://doi.org/10.3390/xxxxx>

Academic Editor: Ali Reza Kamali

Received: 10 February 2023

Revised: 10 March 2023

Accepted: 13 March 2023

Published: 14 March 2023

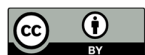

**Copyright:** © 2023 by the authors. Submitted for possible open access publication under the terms and conditions of the Creative Commons Attribution (CC BY) license (<https://creativecommons.org/licenses/by/4.0/>).

- Applications. *ACS Sustainable Chemistry and Engineering* **2022**, *10*, 372–381, doi:10.1021/acssuschemeng.1c06480.
6. Lei, Y.; Remmers, J.C.; Saakes, M.; Van Der Weijden, R.D.; Buisman, C.J.N. Influence of Cell Configuration and Long-Term Operation on Electrochemical Phosphorus Recovery from Domestic Wastewater. *ACS Sustainable Chemistry and Engineering* **2019**, *7*, 7362–7368, doi:10.1021/acssuschemeng.9b00563.
  7. Liu, F.; Lv, H.; Zuo, Z.; Xie, M.; Li, R.; Zhao, H. A Denitrification-Phase Transition and Protection Rings (DPP) Process for Recycling Electrolytic Aluminum Dross. *ACS Sustainable Chemistry and Engineering* **2021**, *9*, 13751–13760, doi:10.1021/acssuschemeng.1c04380.
  8. Santawaja, P.; Kudo, S.; Mori, A.; Tahara, A.; Asano, S.; Hayashi, J.-I. Sustainable Iron-Making Using Oxalic Acid: The Concept, A Brief Review of Key Reactions, and An Experimental Demonstration of the Iron-Making Process. *ACS Sustainable Chemistry and Engineering* **2020**, *8*, 13292–13301, doi:10.1021/acssuschemeng.0c03593.
  9. Shanmugam, K.; Gadhamshetty, V.; Yadav, P.; Athanassiadis, D.; Tysklind, M.; Upadhyayula, V.K.K. Advanced High-Strength Steel and Carbon Fiber Reinforced Polymer Composite Body in White for Passenger Cars: Environmental Performance and Sustainable Return on Investment under Different Propulsion Modes. *ACS Sustainable Chemistry and Engineering* **2019**, *7*, 4951–4963, doi:10.1021/acssuschemeng.8b05588.
  10. Shanmugam, K.; Jansson, S.; Gadhamshetty, V.; Matsakas, L.; Rova, U.; Tysklind, M.; Christakopoulos, P.; Upadhyayula, V.K.K. Ecoefficiency of Thermal Insulation Sandwich Panels Based on Fly Ash Modified with Colloidal Mesoporous Silica. *ACS Sustainable Chemistry and Engineering* **2019**, *7*, 20000–20012, doi:10.1021/acssuschemeng.9b05726.
  11. Singh, A.V.; Maharjan, R.S.; Jungnickel, H.; Romanowski, H.; Hachenberger, Y.U.; Reichardt, P.; Bierkandt, F.; Siewert, K.; Gadicherla, A.; Laux, P.; et al. Evaluating Particle Emissions and Toxicity of 3D Pen Printed Filaments with Metal Nanoparticles As Additives: In Vitro and in Silico Discriminant Function Analysis. *ACS Sustainable Chemistry and Engineering* **2021**, *9*, 11724–11737, doi:10.1021/acssuschemeng.1c02589.
  12. Sun, B.; Li, J.; Guo, Y.; Li, H.; Mi, H.-Y.; Dong, B.; Liu, C.; Shen, C. Superhydrophobic UHMWPE Foams with High Mechanical Robustness and Durability Fabricated by Supercritical CO<sub>2</sub> Foaming. *ACS Sustainable Chemistry and Engineering* **2021**, *9*, 12663–12673, doi:10.1021/acssuschemeng.1c04573.
  13. Lozrt, J.; Votava, J.; Smak, R.; Polcar, A. Influence of Zinc Coatings Mechanical Pre-Treatments for the Formation of Environmentally Friendly Passivation Duplex Anti-Corrosion Systems. *Acta Technologica Agriculturae* **2022**, *25*, 53–60, doi:10.2478/ata-2022-0009.
  14. Rozlivka, J.; Kašpar, V.; Dostál, P.; Černe, M.; Hajtman, B.; Žarnovské, J. Using Acoustic Emission for Measuring Surface Roughness. *Acta Technologica*

- Agriculturae* **2020**, *23*, 150–154, doi:10.2478/ata-2020-0024.
15. Jothi, V.R.; Karuppasamy, K.; Maiyalagan, T.; Rajan, H.; Jung, C.-Y.; Yi, S.C. Corrosion and Alloy Engineering in Rational Design of High Current Density Electrodes for Efficient Water Splitting. *Advanced Energy Materials* **2020**, *10*, doi:10.1002/aenm.201904020.
  16. Venugopal, V.; Latha, P.K.; Shanmugam, R.; Krishnamoorthy, M.; Johnson, P. Occupational Heat Stress Induced Health Impacts: A Cross-Sectional Study from South Indian Working Population. *Advances in Climate Change Research* **2020**, *11*, 31–39, doi:10.1016/j.accre.2020.05.009.
  17. Awchat, G.D.; Kumthekar, M.B. Cost-Benefit Analysis of Using Recycled Coarse Aggregate in Plain and Fibre Reinforced Concrete. *Advances in Science and Technology Research Journal* **2021**, *15*, 233–242, doi:10.12913/22998624/139205.
  18. Surdacki, P.; Gontarz, A.; Winiarski, G.; Samolyk, G. Research of the Tool Velocity and Product Shape Aspects of the Hot Radial Rolling of C45 Steel Rings. *Advances in Science and Technology Research Journal* **2021**, *15*, 352–363, doi:10.12913/22998624/143269.
  19. Szala, M.; Walczak, M.; Hejwowski, T. Factors Influencing Cavitation Erosion of NiCrSiB Hardfacings Deposited by Oxy-Acetylene Powder Welding on Grey Cast Iron. *Advances in Science and Technology Research Journal* **2021**, *15*, 376–386, doi:10.12913/22998624/143304.
  20. Chen, S.; Cui, K.; Yu, T.-Y.; Chao, H.-R.; Hsu, Y.-C.; Lu, I.-C.; Arcega, R.D.; Tsai, M.-H.; Lin, S.-L.; Chao, W.-C.; et al. A Big Data Analysis of PM<sub>2.5</sub> and PM<sub>10</sub> from Low Cost Air Quality Sensors near Traffic Areas. *Aerosol and Air Quality Research* **2019**, *19*, 1721–1733.
  21. Chen, T.W.; Chen, J.C.; Liu, Z.S.; Chi, K.H.; Chang, M.B. Characterization of Pm, Pahs and Gaseous Pollutants Emitted from Sintering Process and Electric Arc Furnace. *Aerosol and Air Quality Research* **2021**, *21*, doi:10.4209/aaqr.210140.
  22. Cheng, W.-H.; Chang, C.-Y.; Chen, Y.-Y.; Su, H.-W. Chemical Composition of Aerosols of an Electronic Cigarette. *Aerosol and Air Quality Research* **2021**, *21*, doi:10.4209/aaqr.200672.
  23. Cheng, W.; Yuan, C. Using a Micro Sampler on a Drone to Extract Organic Vapors—A Case Study of Monitoring Industrial Pollution. *Aerosol and Air Quality Research* **2021**, *21*, doi:10.4209/aaqr.2020.06.0359.
  24. Guttikunda, S.K.; Pant, P.; Nishadh, K.A.; Jawahar, P. Particulate Matter Source Contributions for Raipur-Durg-Bhilai Region of Chhattisgarh, India. *Aerosol and Air Quality Research* **2019**, *19*, 528–540, doi:10.4209/aaqr.2018.06.0237.
  25. Lee, J.; Yoo, D.; Ryu, S.; Ham, S.; Lee, K.; Yeo, M.; Min, K.; Yoon, C. Quantity, Size Distribution, and Characteristics of Cough-Generated Aerosol Produced by Patients with an Upper Respiratory Tract Infection. *Aerosol and Air Quality Research* **2019**, *19*, 840–853, doi:10.4209/aaqr.2018.01.0031.
  26. Licen, S.; Cozzutto, S.; Barbieri, P. Assessment and Comparison of Multi-Annual Size Profiles of Particulate Matter Monitored at an Urban-Industrial Site by an

- Optical Particle Counter with a Chemometric Approach. *Aerosol and Air Quality Research* **2020**, *20*, 800–809, doi:10.4209/aaqr.2019.08.0414.
27. Lu, H.-Y.; Wu, Y.-L.; Mutuku, J.K.; Chang, K.-H. Various Sources of PM<sub>2.5</sub> and Their Impact on the Air Quality in Tainan City, Taiwan. *Aerosol and Air Quality Research* **2019**, *19*, 601–619, doi:10.4209/aaqr.2019.01.0024.
28. Sanjekar, P.S.; Patil, J.B. Emissions of NO<sub>x</sub>, PM, SO<sub>2</sub>, and VOCs from Coal-Fired Boilers Related to Coal Washing, Iron-Steel Production, and Lime and Gypsum Making in Shanxi, China. *Aerosol and Air Quality Research* **2019**, *19*, 2056–2069, doi:10.4209/aaqr.2019.07.0363.
29. Tseng, Y.-L.; Wong, K.-W.; Yuan, C.-S.; Lin, C. Diurnal Variation of Chemical Characteristics and Source Identification of Fine Particles in the Kaohsiung Harbor. *Aerosol and Air Quality Research* **2022**, *22*, doi:10.4209/aaqr.220100.
30. Xu, Y.; Yu, H.; Yan, Y.; Peng, L.; Li, R.; Wang, C.; Li, Z. Emission Characteristics of Volatile Organic Compounds from Typical Coal Utilization Sources: A Case Study in Shanxi of Northern China. *Aerosol and Air Quality Research* **2021**, *21*, doi:10.4209/aaqr.210050.
31. Zhou, X.; Strezov, V.; Jiang, Y.; Yang, X.; He, J.; Evans, T. Life Cycle Impact Assessment of Airborne Metal Pollution near Selected Iron and Steelmaking Industrial Areas in China. *Aerosol and Air Quality Research* **2020**, *20*, 1582–1590, doi:10.4209/aaqr.2019.10.0552.
32. Dyakov, I.V.; Bergmans, B.; Idczak, F.; Blondeau, J.; Bram, S.; Cornette, J.; Coppieters, T.; Contino, F.; Mertens, J.; Breulet, H. Intercomparative Measurements of Particle Emission from Biomass Pellet Boiler with Portable and Stationary Dilution Devices. *Aerosol Science and Technology* **2021**, *55*, 665–680, doi:10.1080/02786826.2021.1888865.
33. Li, L.; Lee, E.S.; Nguyen, C.; Zhu, Y. Effects of Propylene Glycol, Vegetable Glycerin, and Nicotine on Emissions and Dynamics of Electronic Cigarette Aerosols. *Aerosol Science and Technology* **2020**, *54*, 1270–1281, doi:10.1080/02786826.2020.1771270.
34. Sellitto, M.A.; Murakami, F.K. Destination of the Waste Generated by a Steelmaking Plant: A Case Study in Latin America. *Aestimum* **2020**, *77*, 127–144, doi:10.13128/aestim-9025.
35. Nasr, R.B.; Melki, M.N.E.; Moueddeb, K.E.; Kairouani, L. Bin Stored Wheat Temperature Simulation under South Mediterranean Climate. *Agricultural Engineering International: CIGR Journal* **2021**, *23*, 295–308.
36. Sheng, T.; Zhang, P.; Huang, Z.; Yang, Y.; Sun, J.; Jiang, B.; Ding, X.; Wang, J.; Yang, Y.; Liao, Z. The Screened Waveguide for Intrusive Acoustic Emission Detection and Its Application in Circulating Fluidized Bed. *AIChE Journal* **2021**, *67*, doi:10.1002/aic.17118.
37. Zuo, Y.; Zhang, B.; Li, T.; Zhang, M.; Fan, J.; Liu, M.; Xu, J.; Yang, C.; Yang, H.; Guo, X. Highly Stable Monolithic Titanium Silicalite-1 Catalyst for 1-Butene Epoxidation. *AIChE Journal* **2022**, doi:10.1002/aic.17870.

38. Abdul-Wahab, S.A.; Charabi, Y.; Osman, I.I.; Al-Rawas, G.A.; Fadlallah, S.O. Impact of the Ambient Air Quality Due to the Dispersion of PM<sub>10</sub> from a Hot-Dip Galvanizing Plant Located in the Sultanate of Oman. *Air Quality, Atmosphere and Health* **2019**, *12*, 1279–1289, doi:10.1007/s11869-019-00738-0.
39. Key, K.; Kulaç, Ş. Proof of Concept to Characterize Historical Heavy Metal Concentrations from Annual Rings of *Corylus Colurna*: Determining the Changes of Pb, Cr, and Zn Concentrations in Atmosphere in 180 Years in North Turkey. *Air Quality, Atmosphere and Health* **2022**, doi:10.1007/s11869-022-01206-y.
40. Lin, C.-H.; Lai, C.-H.; Hsieh, T.-H.; Tsai, C.-Y. Source Apportionment and Health Effects of Particle-Bound Metals in PM<sub>2.5</sub> near a Precision Metal Machining Factory. *Air Quality, Atmosphere and Health* **2022**, *15*, 605–617, doi:10.1007/s11869-021-01147-y.
41. Mangia, C.; Cervino, M.; Russo, A.; Singer, S.; Gianicolo, E.A.L. Effectiveness of an Air Quality Intervention: An Accountability Study in a Highly Polluted Industrial Town. *Air Quality, Atmosphere and Health* **2020**, *13*, 289–296, doi:10.1007/s11869-019-00783-9.
42. Si, R.; Xin, J.; Zhang, W.; Li, S.; Wen, T.; Wang, Y.; Ma, Y.; Liu, Z.; Xu, X.; Li, M.; et al. Source Apportionment and Health Risk Assessment of Trace Elements in the Heavy Industry Areas of Tangshan, China. *Air Quality, Atmosphere and Health* **2019**, *12*, 1303–1315, doi:10.1007/s11869-019-00745-1.
43. Deng, F.; Li, Y.; Hossain, M.J.; Kendig, M.D.; Arnold, R.; Goldys, E.M.; Morris, M.J.; Liu, G. Polymer Brush Based Fluorescent Immunosensor for Direct Monitoring of Interleukin-1 $\beta$  in Rat Blood. *Analyst* **2019**, *144*, 5682–5690, doi:10.1039/c9an01300h.
44. Huang, J.; Dong, M.; Lu, S.; Yu, Y.; Liu, C.; Yoo, J.H.; Lu, J. A Hybrid Model Combining Wavelet Transform and Recursive Feature Elimination for Running State Evaluation of Heat-Resistant Steel Using Laser-Induced Breakdown Spectroscopy. *Analyst* **2019**, *144*, 3736–3745, doi:10.1039/c9an00370c.
45. Alidoust, M.; Yamini, Y.; Baharfar, M. Microfluidic Paper-Based Analytical Devices and Electromembrane Extraction; Hyphenation of Fields towards Effective Analytical Platforms. *Analytica Chimica Acta* **2022**, *1216*, doi:10.1016/j.aca.2022.339987.
46. Altınışık Tağaç, A.; Erdem, P.; Seyhan Bozkurt, S.; Merdivan, M. Utilization of Montmorillonite Nanocomposite Incorporated with Natural Biopolymers and Benzyl Functionalized Dicationic Imidazolium Based Ionic Liquid Coated Fiber for Solid-Phase Microextraction of Organochlorine Pesticides Prior to GC/MS and GC/ECD. *Analytica Chimica Acta* **2021**, *1185*, doi:10.1016/j.aca.2021.339075.
47. Chen, P.; Xu, X.; Ji, J.; Wu, J.; Lu, T.; Xia, Y.; Wang, L.; Fan, J.; Jin, Y.; Zhang, L.; et al. Specific and Visual Assay of Iodide Ion in Human Urine via Redox Pretreatment Using Ratiometric Fluorescent Test Paper Printed with Dimer DNA Silver Nanoclusters and Carbon Dots. *Analytica Chimica Acta* **2020**, *1138*, 99–107, doi:10.1016/j.aca.2020.09.011.

48. Moros, J.; Cabalín, L.M.; Laserna, J.J. Refractory Residues Classification Strategy Using Emission Spectroscopy of Laser-Induced Plasmas in Tandem with a Decision Tree-Based Algorithm. *Analytica Chimica Acta* **2022**, *1191*, doi:10.1016/j.aca.2021.339294.
49. Shahhoseini, F.; Azizi, A.; Bottaro, C.S. Single-Use Porous Polymer Thin-Film Device: A Reliable Sampler for Analysis of Drugs in Small Volumes of Biofluids. *Analytica Chimica Acta* **2022**, *1203*, doi:10.1016/j.aca.2022.339651.
50. Singh, J.; White, R.L. Variable Temperature Infrared Spectroscopy with a Button Sample Holder and Thermoelectric Heating/Cooling. *Analytica Chimica Acta* **2022**, *1198*, doi:10.1016/j.aca.2022.339558.
51. White, R.L. Diffuse Reflection Mid-Infrared Spectroscopy of Neat Powders by Using a Wire Mesh “Button” Sample Holder. *Analytica Chimica Acta* **2020**, *1098*, 110–116, doi:10.1016/j.aca.2019.11.019.
52. Yan, J.; Hao, Z.; Zhou, R.; Tang, Y.; Yang, P.; Liu, K.; Zhang, W.; Li, X.; Lu, Y.; Zeng, X. A Quantitative Analysis Method Assisted by Image Features in Laser-Induced Breakdown Spectroscopy. *Analytica Chimica Acta* **2019**, *1082*, 30–36, doi:10.1016/j.aca.2019.07.058.
53. Żebrowski, R.; Walczak, M.; Drozd, K.; Jarosz, M.J. Changes of Cytotoxicity of Ti-6Al-4V Alloy Made by Dmls Technology as Effect of the Shot Peening. *Annals of Agricultural and Environmental Medicine* **2020**, *27*, 706–712, doi:10.26444/aaem/116386.
54. Meng, J.; Su, Y.; Xie, S. Loose Parts Detection Method Combining Blind Deconvolution with Support Vector Machine. *Annals of Nuclear Energy* **2020**, *149*, doi:10.1016/j.anucene.2020.107782.
55. Yokoyama, K.; Ohashi, Y. Clearance Measurement for General Steel Waste. *Annals of Nuclear Energy* **2020**, *141*, doi:10.1016/j.anucene.2019.107299.
56. Dijkstra, J.J.; Comans, R.N.J.; Schokker, J.; van der Meulen, M.J. The Geological Significance of Novel Anthropogenic Materials: Deposits of Industrial Waste and by-Products. *Anthropocene* **2019**, *28*, doi:10.1016/j.ancene.2019.100229.
57. Mallinger, K.; Mergili, M. The Global Iron Industry and the Anthropocene. *Anthropocene Review* **2022**, *9*, 52–70, doi:10.1177/2053019620982332.
58. Inaba, Y.; Xu, S.; Vardner, J.T.; West, A.C.; Banta, S. Microbially Influenced Corrosion of Stainless Steel by Acidithiobacillus Ferrooxidans Supplemented with Pyrite: Importance of Thiosulfate. *Applied and Environmental Microbiology* **2019**, *85*, doi:10.1128/AEM.01381-19.
59. Kumar, M.; Flint, S.; Palmer, J.; Chanapha, S.; Hall, C. Influence of Incubation Temperature and Total Dissolved Solids on Biofilm and Spore Formation by Dairy Isolates of Geobacillus Stearothermophilus. *Applied and Environmental Microbiology* **2021**, *87*, 1–10, doi:10.1128/AEM.02311-20.
60. Lahme, S.; Mand, J.; Longwell, J.; Smith, R.; Enning, D. Severe Corrosion of Carbon Steel in Oil Field Produced Water Can Be Linked to Methanogenic Archaea Containing a Special Type of [NiFe] Hydrogenase. *Applied and Environmental*

- Microbiology* **2021**, *87*, 1–17, doi:10.1128/AEM.01819-20.
61. Ruiz-Llacsahuanga, B.; Hamilton, A.; Zaches, R.; Hanrahan, I.; Critzera, F. Prevalence of *Listeria* Species on Food Contact Surfaces in Washington State Apple Packinghouses. *Applied and Environmental Microbiology* **2021**, *87*, 1–13, doi:10.1128/AEM.02932-20.
  62. Salgar-Chaparro, S.J.; Lepkova, K.; Pojtanabuntoeng, T.; Darwin, A.; Machuca, L.L. Nutrient Level Determines Biofilm Characteristics and Subsequent Impact on Microbial Corrosion and Biocide Effectiveness. *Applied and Environmental Microbiology* **2020**, *86*, doi:10.1128/AEM.02885-19.
  63. Shi, X.; Oliveira, D.A.F.; Holsten, L.; Steinhauer, K.; de Rezende, J.R. Long-Term Biocide Efficacy and Its Effect on a Souring Microbial Community. *Applied and Environmental Microbiology* **2021**, *87*, 1–21, doi:10.1128/AEM.00842-21.
  64. Freyssenet, C.; Karlen, S. Plasma-Activated Aerosolized Hydrogen Peroxide (AHP) in Surface Inactivation Procedures. *Applied Biosafety* **2019**, *24*, 10–19, doi:10.1177/1535676018818559.
  65. Grimaldo, M.A.; Bouyer, D.H.; de Siqueira, C.L.M. Determining the Effectiveness of Decontamination with Ionized Hydrogen Peroxide. *Applied Biosafety* **2020**, *25*, 134–141, doi:10.1177/1535676020935405.
  66. Henneman, J.R.; McQuade, E.A.; Sullivan, R.R.; Downard, J.; Thackrah, A.; Hislop, M. Analysis of Range and Use of a Hybrid Hydrogen Peroxide System for Biosafety Level 3 and Animal Biosafety Level 3 Agriculture Laboratory Decontamination. *Applied Biosafety* **2022**, *27*, 7–14, doi:10.1089/apb.2021.0012.
  67. Schinköthe, J.; Bartram-Sitzius, B.; Teifke, J.-P.; Pfitzner, U.; Reiche, S. Technical and Anatomical Considerations for Reproducible Inactivation of Large Animal Carcasses by Steam Sterilization. *Applied Biosafety* **2020**, doi:10.1177/1535676020919637.
  68. Schinköthe, J.; Bartram-Sitzius, B.; Teifke, J.-P.; Pfitzner, U.; Reiche, S. Technical and Anatomical Considerations for Reproducible Inactivation of Large Animal Carcasses by Steam Sterilization. *Applied Biosafety* **2021**, *26*, 14–22, doi:10.1089/apb.21.919637.
  69. Kim, J.; Lee, H.; Lee, J.-Y.; Park, K.-H.; Kim, W.; Lee, J.H.; Kang, H.-J.; Hong, S.W.; Park, H.-J.; Lee, S.; et al. Photosensitized Production of Singlet Oxygen via C60 Fullerene Covalently Attached to Functionalized Silica-Coated Stainless-Steel Mesh: Remote Bacterial and Viral Inactivation. *Applied Catalysis B: Environmental* **2020**, *270*, doi:10.1016/j.apcatb.2020.118862.
  70. Andrei, J.; Balacescu, A.; Chivu, L.; Gogonea, R.; Patrascu, A.; Zaharia, M. WATER PRODUCTIVITY, EXPLOITATION AND FOOTPRINT: OBSOLETE CONCEPTS OR REPRESENTATIVE TOOLS IN UNDERSTANDING EUROPEAN ENVIRONMENTAL POLICY? *Applied Ecology and Environmental Research* **2021**, *19*, 2541–2564, doi:10.15666/aeer/1903\_25412564.
  71. Jia, Q. URBAN AIR QUALITY ASSESSMENT METHOD BASED ON GIS TECHNOLOGY. *Applied Ecology and Environmental Research* **2019**, *17*, 9367–9375,

- doi:10.15666/aeer/1704\_93679375.
72. Li, X.; Yang, C. ECOLOGICAL ECONOMICS FOR ENERGY CONSERVATION AND EMISSION REDUCTION OF HIGH ENERGY CONSUMING INDUSTRIES BASED ON THEORY OF CIRCULAR ECONOMY. *Applied Ecology and Environmental Research* **2019**, *17*, 14587–14598, doi:10.15666/aeer/1706\_1458714598.
  73. Zhang, T.; Chen, L.; Wang, R.; Wang, B.; Liu, Y.; Liu, W.; Wang, J.; Wen, M. THE INFLUENCING FACTORS OF INDUSTRIAL CARBON EMISSIONS IN THE CONTEXT OF UNDERTAKING INDUSTRIAL TRANSFER IN ANHUI PROVINCE, CHINA. *Applied Ecology and Environmental Research* **2019**, *17*, 4205–4227, doi:10.15666/aeer/1702\_42054227.
  74. Cai, B.; Lu, J.; Wang, J.; Dong, H.; Liu, X.; Chen, Y.; Chen, Z.; Cong, J.; Cui, Z.; Dai, C.; et al. A Benchmark City-Level Carbon Dioxide Emission Inventory for China in 2005. *Applied Energy* **2019**, *233–234*, 659–673, doi:10.1016/j.apenergy.2018.10.016.
  75. Chauvy, R.; Meunier, N.; Thomas, D.; De Weireld, G. Selecting Emerging CO<sub>2</sub> Utilization Products for Short- to Mid-Term Deployment. *Applied Energy* **2019**, *236*, 662–680, doi:10.1016/j.apenergy.2018.11.096.
  76. Chen, S.; Patil, S.; Brown, R.; Schroder, U. Strategies for Optimizing the Power Output of Microbial Fuel Cells: Transitioning from Fundamental Studies to Practical Implementation. *Applied Energy* **2019**, *233*, 15–28, doi:10.1016/j.apenergy.2018.10.015.
  77. de Kleijne, K.; James, J.; Hanssen, S.V.; van Zelm, R. Environmental Benefits of Urea Production from Basic Oxygen Furnace Gas. *Applied Energy* **2020**, *270*, doi:10.1016/j.apenergy.2020.115119.
  78. Ding, J.; Wang, Y.; Gu, R.; Wang, W.; Lu, J. Thermochemical Storage Performance of Methane Reforming with Carbon Dioxide Using High Temperature Slag. *Applied Energy* **2019**, *250*, 1270–1279, doi:10.1016/j.apenergy.2019.05.064.
  79. Dinga, C.; Wen, Z. Many-Objective Optimization of Energy Conservation and Emission Reduction in China's Cement Industry. *Applied Energy* **2021**, *304*, doi:10.1016/j.apenergy.2021.117714.
  80. Dolatabadi, N.; Forder, M.; Morris, N.; Rahmani, R.; Rahnejat, H.; Howell-Smith, S. Influence of Advanced Cylinder Coatings on Vehicular Fuel Economy and Emissions in Piston Compression Ring Conjunction. *Applied Energy* **2020**, *259*, doi:10.1016/j.apenergy.2019.114129.
  81. Griffin, P.W.; Hammond, G.P. Industrial Energy Use and Carbon Emissions Reduction in the Iron and Steel Sector: A UK Perspective. *Applied Energy* **2019**, *249*, 109–125, doi:10.1016/j.apenergy.2019.04.148.
  82. Gul, E.; Riva, L.; Nielsen, H.K.; Yang, H.; Zhou, H.; Yang, Q.; Skreiberg, Ø.; Wang, L.; Barbanera, M.; Zampilli, M.; et al. Substitution of Coke with Pelletized Biocarbon in the European and Chinese Steel Industries: An LCA Analysis. *Applied Energy* **2021**, *304*, doi:10.1016/j.apenergy.2021.117644.
  83. Hwang, W.; Kim, K.-B.; Cho, J.Y.; Yang, C.H.; Kim, J.H.; Song, G.J.; Song, Y.; Jeon, D.H.; Ahn, J.H.; Do Hong, S.; et al. Watts-Level Road-Compatible Piezoelectric



- Energy Harvester for a Self-Powered Temperature Monitoring System on an Actual Roadway. *Applied Energy* **2019**, *243*, 313–320, doi:10.1016/j.apenergy.2019.03.122.
84. Kermeli, K.; Edelenbosch, O.Y.; Crijns-Graus, W.; van Ruijven, B.J.; Mima, S.; van Vuuren, D.P.; Worrell, E. The Scope for Better Industry Representation in Long-Term Energy Models: Modeling the Cement Industry. *Applied Energy* **2019**, *240*, 964–985, doi:10.1016/j.apenergy.2019.01.252.
85. Le Boulzec, H.; Delannoy, L.; Andrieu, B.; Verzier, F.; Vidal, O.; Mathy, S. Dynamic Modeling of Global Fossil Fuel Infrastructure and Materials Needs: Overcoming a Lack of Available Data. *Applied Energy* **2022**, *326*, doi:10.1016/j.apenergy.2022.119871.
86. Lee, H.; Lee, J.; Koo, Y. Economic Impacts of Carbon Capture and Storage on the Steel Industry—A Hybrid Energy System Model Incorporating Technological Change. *Applied Energy* **2022**, *317*, doi:10.1016/j.apenergy.2022.119208.
87. Matino, I.; Dettori, S.; Colla, V.; Weber, V.; Salame, S. Forecasting Blast Furnace Gas Production and Demand through Echo State Neural Network-Based Models: Pave the Way to off-Gas Optimized Management. *Applied Energy* **2019**, *253*, doi:10.1016/j.apenergy.2019.113578.
88. Moya, D.; Budinis, S.; Giarola, S.; Hawkes, A. Agent-Based Scenarios Comparison for Assessing Fuel-Switching Investment in Long-Term Energy Transitions of the India's Industry Sector. *Applied Energy* **2020**, *274*, doi:10.1016/j.apenergy.2020.115295.
89. Nwachukwu, C.M.; Olofsson, E.; Lundmark, R.; Wetterlund, E. Evaluating Fuel Switching Options in the Swedish Iron and Steel Industry under Increased Competition for Forest Biomass. *Applied Energy* **2022**, *324*, doi:10.1016/j.apenergy.2022.119878.
90. Nwachukwu, C.M.; Wang, C.; Wetterlund, E. Exploring the Role of Forest Biomass in Abating Fossil CO<sub>2</sub> Emissions in the Iron and Steel Industry – The Case of Sweden. *Applied Energy* **2021**, *288*, doi:10.1016/j.apenergy.2021.116558.
91. Paltsev, S.; Morris, J.; Kheshgi, H.; Herzog, H. Hard-to-Abate Sectors: The Role of Industrial Carbon Capture and Storage (CCS) in Emission Mitigation. *Applied Energy* **2021**, *300*, doi:10.1016/j.apenergy.2021.117322.
92. Ren, M.; Lu, P.; Liu, X.; Hossain, M.S.; Fang, Y.; Hanaoka, T.; O'Gallachoir, B.; Glynn, J.; Dai, H. Decarbonizing China's Iron and Steel Industry from the Supply and Demand Sides for Carbon Neutrality. *Applied Energy* **2021**, *298*, doi:10.1016/j.apenergy.2021.117209.
93. Ren, X.; Li, J.; Hu, M.; Pei, G.; Jiao, D.; Zhao, X.; Ji, J. Feasibility of an Innovative Amorphous Silicon Photovoltaic/Thermal System for Medium Temperature Applications. *Applied Energy* **2019**, *252*, doi:10.1016/j.apenergy.2019.113427.
94. Resalati, S.; Okoroafor, T.; Maalouf, A.; Saucedo, E.; Placidi, M. Life Cycle Assessment of Different Chalcogenide Thin-Film Solar Cells. *Applied Energy* **2022**, *313*, doi:10.1016/j.apenergy.2022.118888.

95. Rissman, J.; Bataille, C.; Masanet, E.; Aden, N.; Morrow, W.R., III; Zhou, N.; Elliott, N.; Dell, R.; Heeren, N.; Huckestein, B.; et al. Technologies and Policies to Decarbonize Global Industry: Review and Assessment of Mitigation Drivers through 2070. *Applied Energy* **2020**, *266*, doi:10.1016/j.apenergy.2020.114848.
96. Riva, L.; Nielsen, H.K.; Skreiberg, Ø.; Wang, L.; Bartocci, P.; Barbanera, M.; Bidini, G.; Fantozzi, F. Analysis of Optimal Temperature, Pressure and Binder Quantity for the Production of Biocarbon Pellet to Be Used as a Substitute for Coke. *Applied Energy* **2019**, *256*, doi:10.1016/j.apenergy.2019.113933.
97. Sato, F.; Furubayashi, T.; Nakata, T. Application of Energy and CO<sub>2</sub> Reduction Assessments for End-of-Life Vehicles Recycling in Japan. *Applied Energy* **2019**, *237*, 779–794, doi:10.1016/j.apenergy.2019.01.002.
98. Sun, J.; Na, H.; Yan, T.; Che, Z.; Qiu, Z.; Yuan, Y.; Li, Y.; Du, T.; Song, Y.; Fang, X. Cost-Benefit Assessment of Manufacturing System Using Comprehensive Value Flow Analysis. *Applied Energy* **2022**, *310*, doi:10.1016/j.apenergy.2022.118604.
99. Sun, W.; Wang, Q.; Zhou, Y.; Wu, J. Material and Energy Flows of the Iron and Steel Industry: Status Quo, Challenges and Perspectives. *Applied Energy* **2020**, *268*, doi:10.1016/j.apenergy.2020.114946.
100. Tian, S.; Di, Y.; Dai, M.; Chen, W.; Zhang, Q. Comprehensive Assessment of Energy Conservation and CO<sub>2</sub> Emission Reduction in Future Aluminum Supply Chain. *Applied Energy* **2022**, *305*, doi:10.1016/j.apenergy.2021.117796.
101. Toktarova, A.; Walter, V.; Göransson, L.; Johnsson, F. Interaction between Electrified Steel Production and the North European Electricity System. *Applied Energy* **2022**, *310*, doi:10.1016/j.apenergy.2022.118584.
102. Vigneshwaran, K.; Sodhi, G.S.; Muthukumar, P.; Guha, A.; Senthilmurugan, S. Experimental and Numerical Investigations on High Temperature Cast Steel Based Sensible Heat Storage System. *Applied Energy* **2019**, *251*, doi:10.1016/j.apenergy.2019.113322.
103. Vögele, S.; Grajewski, M.; Govorukha, K.; Rübbelke, D. Challenges for the European Steel Industry: Analysis, Possible Consequences and Impacts on Sustainable Development. *Applied Energy* **2020**, *264*, doi:10.1016/j.apenergy.2020.114633.
104. Walker, S.R.J.; Thies, P.R. A Life Cycle Assessment Comparison of Materials for a Tidal Stream Turbine Blade. *Applied Energy* **2022**, *309*, doi:10.1016/j.apenergy.2021.118353.
105. Wang, X.; Yu, B.; An, R.; Sun, F.; Xu, S. An Integrated Analysis of China's Iron and Steel Industry towards Carbon Neutrality. *Applied Energy* **2022**, *322*, doi:10.1016/j.apenergy.2022.119453.
106. Wang, Y.; Chen, C.; Tao, Y.; Wen, Z.; Chen, B.; Zhang, H. A Many-Objective Optimization of Industrial Environmental Management Using NSGA-III: A Case of China's Iron and Steel Industry. *Applied Energy* **2019**, *242*, 46–56, doi:10.1016/j.apenergy.2019.03.048.
107. Wei, X.; Qin, B.; Yang, C.; Wang, W.; Ding, J.; Wang, Y.; Peng, Q. Nox Emission of

- Ternary Nitrate Molten Salts in High-Temperature Heat Storage and Transfer Process. *Applied Energy* **2019**, *236*, 147–154, doi:10.1016/j.apenergy.2018.11.087.
108. Wu, J.; Tan, Y.; Li, P.; Wang, H.; Zhu, X.; Liao, Q. Centrifugal-Granulation-Assisted Thermal Energy Recovery towards Low-Carbon Blast Furnace Slag Treatment: State of the Art and Future Challenges. *Applied Energy* **2022**, *325*, doi:10.1016/j.apenergy.2022.119835.
109. Wu, R.; Lin, B. Does Industrial Agglomeration Improve Effective Energy Service: An Empirical Study of China's Iron and Steel Industry. *Applied Energy* **2021**, *295*, doi:10.1016/j.apenergy.2021.117066.
110. Xi, H.; Wu, X.; Chen, X.; Sha, P. Artificial Intelligent Based Energy Scheduling of Steel Mill Gas Utilization System towards Carbon Neutrality. *Applied Energy* **2021**, *295*, doi:10.1016/j.apenergy.2021.117069.
111. Yue, H.; Worrell, E.; Crijns-Graus, W. Impacts of Regional Industrial Electricity Savings on the Development of Future Coal Capacity per Electricity Grid and Related Air Pollution Emissions – A Case Study for China. *Applied Energy* **2021**, *282*, doi:10.1016/j.apenergy.2020.116241.
112. Zhang, H.; Sun, W.; Li, W.; Ma, G. A Carbon Flow Tracing and Carbon Accounting Method for Exploring CO<sub>2</sub> Emissions of the Iron and Steel Industry: An Integrated Material–Energy–Carbon Hub. *Applied Energy* **2022**, *309*, doi:10.1016/j.apenergy.2021.118485.
113. Klejch, F.; Schmidová, E.; Mejstský, T. ANISOTROPY AND HARDENABILITY OF INTERSTITIAL FREE STEELS UNDER THE INFLUENCE OF LOCALIZED DEFORMATION. *Applied Engineering Letters* **2022**, *7*, 125–131, doi:10.18485/aeletters.2022.7.3.5.
114. Abbaszade, G.; Tserendorj, D.; Salazar-Yanez, N.; Zacháry, D.; Völgyesi, P.; Tóth, E.; Szabó, C. Lead and Stable Lead Isotopes as Tracers of Soil Pollution and Human Health Risk Assessment in Former Industrial Cities of Hungary. *Applied Geochemistry* **2022**, *145*, doi:10.1016/j.apgeochem.2022.105397.
115. Kousehlar, M.; Widom, E. Identifying the Sources of Air Pollution in an Urban-Industrial Setting by Lichen Biomonitoring - A Multi-Tracer Approach. *Applied Geochemistry* **2020**, *121*, doi:10.1016/j.apgeochem.2020.104695.
116. Al Hariri, A.; Selimli, S.; Dumrul, H. Effectiveness of Heat Sink Fin Position on Photovoltaic Thermal Collector Cooling Supported by Paraffin and Steel Foam: An Experimental Study. *Applied Thermal Engineering* **2022**, *213*, doi:10.1016/j.applthermaleng.2022.118784.
117. Arunkumar, T.; Murugesan, D.; Raj, K.; Denkenberger, D.; Viswanathan, C.; Rufuss, D.D.W.; Velraj, R. Effect of Nano-Coated CuO Absorbers with PVA Sponges in Solar Water Desalting System. *Applied Thermal Engineering* **2019**, *148*, 1416–1424, doi:10.1016/j.applthermaleng.2018.10.129.
118. Lee, M.J.; Noh, D.S.; Lee, E.K. Characteristics of Large-Area Porous Media Burner Applicable to Direct-Fired Non-Oxidizing Annealing Furnace. *Applied Thermal Engineering* **2021**, *186*, doi:10.1016/j.applthermaleng.2020.116489.

119. Li, F.; Chu, M.; Tang, J.; Liu, Z.; Zhao, Z.; Liu, P.; Yan, R. Quantifying the Energy Saving Potential and Environmental Benefit of Hydrogen-Based Steelmaking Process: Status and Future Prospect. *Applied Thermal Engineering* **2022**, *211*, doi:10.1016/j.applthermaleng.2022.118489.
120. Liponi, A.; Baccioli, A.; Vera, D.; Ferrari, L. Seawater Desalination through Reverse Osmosis Driven by Ocean Thermal Energy Conversion Plant: Thermodynamic and Economic Feasibility. *Applied Thermal Engineering* **2022**, *213*, doi:10.1016/j.applthermaleng.2022.118694.
121. Mariños Rosado, D.J.; Rojas Chávez, S.B.; Amaro Gutierrez, J.; Mayworm de Araújo, F.H.; de Carvalho, J.A., Jr.; Mendiburu, A.Z. Energetic Analysis of Reheating Furnaces in the Combustion of Coke Oven Gas, Linz-Donawitz Gas and Blast Furnace Gas in the Steel Industry. *Applied Thermal Engineering* **2020**, *169*, doi:10.1016/j.applthermaleng.2020.114905.
122. Nakamura, H.; Kuwayama, Y.; Onishi, T.; Tezuka, T.; Hasegawa, S.; Maruta, K.; Araake, T.; Mochida, S. Study of High-Temperature Oxygen Combustion (HiTOx) and Its Heating Performance Using a Laboratory-Scale Test Furnace. *Applied Thermal Engineering* **2021**, *194*, doi:10.1016/j.applthermaleng.2021.117077.
123. Ni, P.; Wen, Z.; Su, F.; Huang, J.; Liu, X.; Lou, G.; Dou, R. Film Boiling Collapse in a Solid Hot Sphere Immersed in Subcooled Forced Convection. *Applied Thermal Engineering* **2020**, *166*, doi:10.1016/j.applthermaleng.2019.114630.
124. Peraza, J.E.; Payri, R.; Gimeno, J.; Carvallo, C. Analysis of Spray/Wall Impingement Using an ECN Single-Hole Injector and a Controlled-Temperature Wall under Realistic Engine Conditions. *Applied Thermal Engineering* **2022**, *208*, doi:10.1016/j.applthermaleng.2022.118167.
125. Pugsley, A.; Zacharopoulos, A.; Deb Mondol, J.; Smyth, M. Vertical Planar Liquid-Vapour Thermal Diodes (PLVTD) and Their Application in Building Façade Energy Systems. *Applied Thermal Engineering* **2020**, *179*, doi:10.1016/j.applthermaleng.2020.115641.
126. Rao, M.; Fernandes, A.; Pronk, P.; Aravind, P.V. Design, Modelling and Techno-Economic Analysis of a Solid Oxide Fuel Cell-Gas Turbine System with CO<sub>2</sub> Capture Fueled by Gases from Steel Industry. *Applied Thermal Engineering* **2019**, *148*, 1258–1270, doi:10.1016/j.applthermaleng.2018.11.108.
127. Tang, W.; Tam, W.C.; Yuan, L.; Dubaniewicz, T.; Thomas, R.; Soles, J. Estimation of the Critical External Heat Leading to the Failure of Lithium-Ion Batteries. *Applied Thermal Engineering* **2020**, *179*, doi:10.1016/j.applthermaleng.2020.115665.
128. Tian, L.-L.; Liu, X.; Chen, S.; Shen, Z.-G. Effect of Fin Material on PCM Melting in a Rectangular Enclosure. *Applied Thermal Engineering* **2020**, *167*, doi:10.1016/j.applthermaleng.2019.114764.
129. Wang, L.; Li, D.; Zhu, H.; Chen, G.; Luo, H.; Che, D. Investigation on Regenerative Heat Exchanger with Novel Low-Leakage System for Flue Gas Denitration in Steel Industry. *Applied Thermal Engineering* **2020**, *178*, doi:10.1016/j.applthermaleng.2020.115483.

130. Wei, Z.; Zhai, X.; Zhang, Q.; Yang, G.; Du, T.; Wei, J. A MINLP Model for Multi-Period Optimization Considering Couple of Gas-Steam-Electricity and Time of Use Electricity Price in Steel Plant. *Applied Thermal Engineering* **2020**, *168*, doi:10.1016/j.applthermaleng.2019.114834.
131. Yousef, M.S.; Hassan, H.; Sekiguchi, H. Energy, Exergy, Economic and Enviroeconomic (4E) Analyses of Solar Distillation System Using Different Absorbing Materials. *Applied Thermal Engineering* **2019**, *150*, 30–41, doi:10.1016/j.applthermaleng.2019.01.005.
132. Zhang, Q.; Wei, Z.; Ma, J.; Qiu, Z.; Du, T. Optimization of Energy Use with CO2 Emission Reducing in an Integrated Iron and Steel Plant. *Applied Thermal Engineering* **2019**, *157*, doi:10.1016/j.applthermaleng.2019.04.045.
133. Zhou, Q.; Wang, P.; Wu, K.; Cao, J.; Zhang, H.; Zhang, Y.; Niu, B.; Long, D. Performance of High-Temperature Lightweight Multilayer Insulations. *Applied Thermal Engineering* **2022**, *211*, doi:10.1016/j.applthermaleng.2022.118436.
134. Dell'Anna, M.M.; Romanazzi, G.; Positano, M.; Specchio, V.; Mastrorilli, P.; Tomasicchio, G.; Damiani, L.; Mali, M. Assessing Environmental Impacts in Using Waste Steel Slags as Construction Materials in a Highly Industrialized Area. *Aquatic Ecosystem Health and Management* **2020**, *23*, 474–482, doi:10.1080/14634988.2020.1827820.
135. Ding, Y.; Xu, L. Hydraulic Pressure-Resistant Design of Highway Water-Rich Tunnels Traversing Exposed Karst Cave in Karst Area of Peak Cluster Landform. *Arabian Journal of Geosciences* **2021**, *14*, doi:10.1007/s12517-021-08045-8.
136. Li, S.; Tan, Z.; Wu, J.; Du, W. Performance of Large Cross-Section Tunnel Constructed in Loose Ground by Optimal Multi-Step Excavation Method. *Arabian Journal of Geosciences* **2020**, *13*, doi:10.1007/s12517-020-05961-z.
137. Wang, J.; Huang, Y.; Cheng, X. Status, Spatial Distribution, and Health Risk Assessment of Potentially Harmful Element from Road Dust in Steel Industry City, China. *Arabian Journal of Geosciences* **2021**, *14*, doi:10.1007/s12517-021-06556-y.
138. Zhao, P.; He, X. Research on Dynamic Data Monitoring of Marine Bridge Steel Structure Building Information Based on BIM Model. *Arabian Journal of Geosciences* **2021**, *14*, doi:10.1007/s12517-021-06601-w.
139. dos Santos, C.A.; do Amaral Sobrinho, N.M.B.; da Mota Gonçalves, R.G.; Costa, T.G.A.; do Carmo, M.G.F. Toxic Metals in Broccoli by Combined Use of Acidity Correctives and Poultry Litter Under Mountain Tropical Conditions. *Archives of Environmental Contamination and Toxicology* **2021**, *80*, 507–518, doi:10.1007/s00244-021-00817-3.
140. Sergeeva, A.; Ziniovsciaia, I.; Vergel, K.; Yushin, N.; Urošević, M.A. The Effect of Heavy Industry on Air Pollution Studied by Active Moss Biomonitoring in Donetsk Region (Ukraine). *Archives of Environmental Contamination and Toxicology* **2021**, *80*, 546–557, doi:10.1007/s00244-021-00834-2.
141. Burchart-Korol, D.; Zawartka, P. Determinants of Environmental Assessment of

- Polish Individual Wastewater Treatment Plants in a Life Cycle Perspective. *Archives of Environmental Protection* **2019**, *45*, 44–54, doi:10.24425/aep.2019.128640.
142. Burchart-Korol, D.; Zawartka, P. Environmental Life Cycle Assessment of Septic Tanks in Urban Wastewater System – a Case Study for Poland. *Archives of Environmental Protection* **2019**, *45*, 68–77, doi:10.24425/aep.2019.130243.
143. Anggraini, R.; Tavio; Raka, G.P.; Agustiar Experimental Load-Drift Relations of Concrete Beam Reinforced and Confined with High-Strength Steel Bars under Reversed Cyclic Loading. *ASEAN Engineering Journal* **2021**, *11*, 56–69, doi:10.11113/AEJ.V11.17864.
144. Mandadi, G.K.; Asmatulu, R.; Khan, W.S.; Asmatulu, E. Fast and Affordable Recycling Approach to Electronic Waste above the Melting Point Using Induction Heat Combined with Centrifugal Forces. *Asia-Pacific Journal of Chemical Engineering* **2020**, *15*, doi:10.1002/apj.2483.
145. Wu, Q.; Zhou, H. Investigation on the Catalytic Combustion of CO over LaMn1-XCuXO3 Promoted by Acid Treatment. *Asia-Pacific Journal of Chemical Engineering* **2022**, *17*, doi:10.1002/apj.2728.
146. Kejun, J.; Chenmin, H.; Weiye, J.; Sha, C.; Chunyan, D.; Jia, L.; Pianpian, X. Transition of the Chinese Economy in the Face of Deep Greenhouse Gas Emissions Cuts in the Future. *Asian Economic Policy Review* **2021**, *16*, 142–162, doi:10.1111/aepr.12330.
147. Cha, S.-H.; Han, Y.-J.; Jeon, J.-W.; Kim, Y.-H.; Kim, H.; Noh, S.; Kwon, M.-H. Development and Field Application of a Passive Sampler for Atmospheric Mercury. *Asian Journal of Atmospheric Environment* **2020**, *14*, 14–27, doi:10.5572/AJAE.2020.14.1.014.
148. Park, J.; Choi, J.; Moon, K.; Kim, D.; Kim, H.-J.; Ahn, J.; Lee, S.; Seo, B.-K.; Kim, J.; Park, S.; et al. Application of Chemical Ionization Mass Spectrometry in Airborne SO<sub>2</sub> Observation on Hanseo Beechcraft 1900 D. *Asian Journal of Atmospheric Environment* **2020**, *14*, 413–421, doi:10.5572/ajae.2020.14.4.413.
149. Abiodun, Y.O.; Olanrewaju, O.A.; Gbenedor, O.P.; Ochulor, E.F.; Obasa, D.V.; Adeosun, S.O. Cutting Cement Industry CO<sub>2</sub> Emissions through Metakaolin Use in Construction. *Atmosphere* **2022**, *13*, doi:10.3390/atmos13091494.
150. Chang, T.; Liu, C.; Huang, K.; Kuo, H. Indoor and Outdoor Exposure to Volatile Organic Compounds and Health Risk Assessment in Residents Living near an Optoelectronics Industrial Park. *Atmosphere* **2019**, *10*, doi:10.3390/atmos10070380.
151. Cheng, Y.Y.; Yu, J.Z. Minimizing Contamination from Plastic Labware in the Quantification of C16 and C18 Fatty Acids in Filter Samples of Atmospheric Particulate Matter and Their Utility in Apportioning Cooking Source Contribution to Urban Pm<sub>2.5</sub>. *Atmosphere* **2020**, *11*, doi:10.3390/atmos11101120.
152. Di Gilio, A.; Palmisani, J.; Trizio, L.; Saracino, G.; Giua, R.; de Gennaro, G. Total P-PAH Levels Nearby a Complex Industrial Area: A Tailored Monitoring Experiment to Assess the Impact of Emission Sources. *Atmosphere* **2020**, *11*, doi:10.3390/ATMOS11050469.

153. Dunea, D.; Iordache, V.; Frasin, L.N.; Neagoe, A.; Predescu, L.; Iordache, S. Monitoring Rainwater Properties and Outdoor Particulate Matter in a Former Steel Manufacturing City in Romania. *Atmosphere* **2021**, *12*, doi:10.3390/atmos12121594.
154. Etim, M.; Babaremu, K.; Lazarus, J.; Omole, D. Health Risk and Environmental Assessment of Cement Production in Nigeria. *Atmosphere* **2021**, *12*, doi:10.3390/atmos12091111.
155. Feng, L.; Dou, L.; Wen, X.; Mu, M.; Ma, X.; Chen, B.; Shi, C.; Hu, X. Study on the Optimized Muffler with Function of PM Filtration for Non-Road Diesel Engines. *Atmosphere* **2022**, *13*, doi:10.3390/atmos13020350.
156. Feng, Y.; An, J.; Tang, G.; Zhang, Y.; Wang, J.; Lv, H. Characteristics and Sources of Volatile Organic Compounds in the Nanjing Industrial Area. *Atmosphere* **2022**, *13*, doi:10.3390/atmos13071136.
157. Frezzini, M.A.; Di Iulio, G.; Tiraboschi, C.; Canepari, S.; Massimi, L. A New Method for the Assessment of the Oxidative Potential of Both Water-Soluble and Insoluble PM. *Atmosphere* **2022**, *13*, doi:10.3390/atmos13020349.
158. Godzik, B. Use of Bioindication Methods in National, Regional and Local Monitoring in Poland-Changes in the Air Pollution Level over Several Decades. *Atmosphere* **2020**, *11*, doi:10.3390/atmos11020143.
159. Jadoon, S.; Nawazish, S.; Mahmood, Q.; Rafique, A.; Sohail, S.; Zaidi, A. Exploring Health Impacts of Occupational Exposure to Carbon Monoxide in the Labour Community of Hattar Industrial Estate. *Atmosphere* **2022**, *13*, doi:10.3390/atmos13030406.
160. Jayashree, P.; Sinha, A.; Gialanella, S.; Straffelini, G. Dry Sliding Behavior and Particulate Emissions of a SiC-Graphite Composite Friction Material Paired with HVOF-Coated Counterface. *Atmosphere* **2022**, *13*, doi:10.3390/atmos13020296.
161. Kura, B.; Jilla, A. Feasibility of the Inverse-Dispersion Model for Quantifying Drydock Emissions. *Atmosphere* **2019**, *10*, doi:10.3390/atmos10060328.
162. Kurihara, K.; Iwata, A.; Horwitz, S.G.M.; Ogane, K.; Sugioka, T.; Matsuki, A.; Okuda, T. Contribution of Physical and Chemical Properties to Dithiothreitol-Measured Oxidative Potentials of Atmospheric Aerosol Particles at Urban and Rural Sites in Japan. *Atmosphere* **2022**, *13*, doi:10.3390/atmos13020319.
163. Li, B.; Zhou, Z.; Xue, Z.; Wei, P.; Ren, Y.; Cao, L.; Feng, X.; Yao, Q.; Ma, J.; Xu, P.; et al. Study on the Pollution Characteristics and Sources of Ozone in Typical Loess Plateau City. *Atmosphere* **2020**, *11*, doi:10.3390/atmos11060555.
164. Lin, Z.; Wang, F.; Ji, T.; Ma, B.; Xu, L.; Xu, Q.; He, K. Characteristics and the Potential Influence of Fugitive PM10 Emissions from Enclosed Storage Yards in Iron and Steel Plant. *Atmosphere* **2020**, *11*, doi:10.3390/ATMOS11080833.
165. Munir, S.; Mayfield, M.; Coca, D.; Mihaylova, L.S.; Osammor, O. Analysis of Air Pollution in Urban Areas with Airviro Dispersion Model-A Case Study in the City of Sheffield, United Kingdom. *Atmosphere* **2020**, *11*, doi:10.3390/atmos11030285.
166. Ou, J.; Pirozzi, C.; Horne, B.; Hanson, H.; Kirchhoff, A.; Mitchell, L.; Coleman, N.;

- Pope, C. Historic and Modern Air Pollution Studies Conducted in Utah. *Atmosphere* **2020**, *11*, doi:10.3390/atmos11101094.
167. Sadiq, A.A.; Khardi, S.; Lazar, A.-N.; Bello, I.W.; Salam, S.P.; Faruk, A.; Alao, M.A.; Catinon, M.; Vincent, M.; Trunfio-Sfarghiu, A.-M. A Characterization and Cell Toxicity Assessment of Particulate Pollutants from Road Traffic Sites in Kano State, Nigeria. *Atmosphere* **2022**, *13*, doi:10.3390/atmos13010080.
168. Sassi, G.; Khan, B.A.; Lecuna, M. Reproducibility of the Quantification of Reversible Wall Interactions in VOC Sampling Lines. *Atmosphere* **2021**, *12*, doi:10.3390/atmos12020280.
169. Seibert, R.; Nikolova, I.; Volná, V.; Krejčí, B.; Hladký, D. Air Pollution Sources' Contribution to PM<sub>2.5</sub> Concentration in the Northeastern Part of the Czech Republic. *Atmosphere* **2020**, *11*, doi:10.3390/atmos11050522.
170. Shao, C.-T.; Cheng, W.-H.; Lin, Y.-C.; Chang, K.-L.; Chen, K.-S.; Yuan, C.-S. Qualifying and Quantifying the Emissions of Volatile Organic Compounds from the Coking Process in a Steel Plant Using an Innovative Sampling Technique. *Atmosphere* **2022**, *13*, doi:10.3390/atmos13091363.
171. Weed, B.M.; Brambila, G.D.; Doezeema, L.A. Natural Seepage of Methane and Light Alkanes at Three Locations in Southern California. *Atmosphere* **2020**, *11*, doi:10.3390/atmos11090979.
172. Wu, Y.; Hu, J.; Wang, H.; Li, H.; Zhang, H.; Chai, F.; Wang, S. The Characteristics of Ambient Non-Methane Hydrocarbons (NMHCs) in Lanzhou, China. *Atmosphere* **2019**, *10*, doi:10.3390/ATMOS10120745.
173. Zhang, Q.; Qin, L.; Zhou, Y.; Jia, S.; Yao, L.; Zhang, Z.; Zhang, L. Evaluation of Extinction Effect of PM<sub>2.5</sub> and Its Chemical Components during Heating Period in an Urban Area in Beijing–Tianjin–Hebei Region. *Atmosphere* **2022**, *13*, doi:10.3390/atmos13030403.
174. Kumar, A.; Sinha, V.; Shabin, M.; Hakkim, H.; Bonsang, B.; Gros, V. Non-Methane Hydrocarbon (NMHC) Fingerprints of Major Urban and Agricultural Emission Sources for Use in Source Apportionment Studies. *Atmospheric Chemistry and Physics* **2020**, *20*, 12133–12152, doi:10.5194/acp-20-12133-2020.
175. Lei, L.; Xie, C.; Wang, D.; He, Y.; Wang, Q.; Zhou, W.; Hu, W.; Fu, P.; Chen, Y.; Pan, X.; et al. Fine Particle Characterization in a Coastal City in China: Composition, Sources, and Impacts of Industrial Emissions. *Atmospheric Chemistry and Physics* **2020**, *20*, 2877–2890, doi:10.5194/acp-20-2877-2020.
176. Liu, B.; Wang, Y.; Meng, H.; Dai, Q.; Diao, L.; Wu, J.; Shi, L.; Wang, J.; Zhang, Y.; Feng, Y. Dramatic Changes in Atmospheric Pollution Source Contributions for a Coastal Megacity in Northern China from 2011 to 2020. *Atmospheric Chemistry and Physics* **2022**, *22*, 8597–8615, doi:10.5194/acp-22-8597-2022.
177. Zhang, Y.; Zhao, Y.; Gao, M.; Bo, X.; Nielsen, C. Air Quality and Health Benefits from Ultra-Low Emission Control Policy Indicated by Continuous Emission Monitoring: A Case Study in the Yangtze River Delta Region, China. *Atmospheric Chemistry and Physics* **2021**, *21*, 6411–6430, doi:10.5194/acp-21-6411-2021.



178. Zheng, H.; Cai, S.; Wang, S.; Zhao, B.; Chang, X.; Hao, J. Development of a Unit-Based Industrial Emission Inventory in the Beijing-Tianjin-Hebei Region and Resulting Improvement in Air Quality Modeling. *Atmospheric Chemistry and Physics* **2019**, *19*, 3447–3462, doi:10.5194/acp-19-3447-2019.
179. Chen, T.-F.; Chang, K.-H.; Lee, C.-H. Simulation and Analysis of Causes of a Haze Episode by Combining CMAQ-IPR and Brute Force Source Sensitivity Method. *Atmospheric Environment* **2019**, *218*, doi:10.1016/j.atmosenv.2019.117006.
180. Dai, Q.; Bi, X.; Huangfu, Y.; Yang, J.; Li, T.; Khan, J.Z.; Song, C.; Xu, J.; Wu, J.; Zhang, Y.; et al. A Size-Resolved Chemical Mass Balance (SR-CMB) Approach for Source Apportionment of Ambient Particulate Matter by Single Element Analysis. *Atmospheric Environment* **2019**, *197*, 45–52, doi:10.1016/j.atmosenv.2018.10.026.
181. Fayad, L.; Coeur, C.; Fagniez, T.; Secordel, X.; Houzel, N.; Mouret, G. Kinetic and Mechanistic Study of the Gas-Phase Reaction of Ozone with  $\gamma$ -Terpinene. *Atmospheric Environment* **2021**, *246*, doi:10.1016/j.atmosenv.2020.118073.
182. Li, R.; Yan, Y.; Peng, L.; Wang, F.; Lu, X.; Wang, Y.; Xu, Y.; Wang, C. Enhancement of Ozone Formation by Increased Vehicles Emission and Reduced Coal Combustion Emission in Taiyuan, a Traditional Industrial City in Northern China. *Atmospheric Environment* **2021**, *267*, doi:10.1016/j.atmosenv.2021.118759.
183. Liu, X.; Li, X.; Tan, X.; Bai, H.; Li, Y.; Zhang, S. Distribution Characteristics, Source Apportionment, and Chemical Reactivity of Volatile Organic Compounds in Two Adjacent Areas in Shanxi, North China. *Atmospheric Environment* **2022**, *290*, doi:10.1016/j.atmosenv.2022.119374.
184. Mallik, C.; Mahapatra, P.S.; Kumar, P.; Panda, S.; Boopathy, R.; Das, T.; Lal, S. Influence of Regional Emissions on SO<sub>2</sub> Concentrations over Bhubaneswar, a Capital City in Eastern India Downwind of the Indian SO<sub>2</sub> Hotspots. *Atmospheric Environment* **2019**, *209*, 220–232, doi:10.1016/j.atmosenv.2019.04.006.
185. Nory, R.M.; Figueiredo, A.M.G.; Souto-Oliveira, C.E.; Babinski, M. Urban Contamination Sources in Tunnel Dusts from São Paulo City: Elemental and Isotopic Characterization. *Atmospheric Environment* **2021**, *254*, doi:10.1016/j.atmosenv.2021.118188.
186. Palmisani, J.; Nørgaard, A.W.; Kofoed-Sørensen, V.; Clausen, P.A.; de Gennaro, G.; Wolkoff, P. Formation of Ozone-Initiated VOCs and Secondary Organic Aerosol Following Application of a Carpet Deodorizer. *Atmospheric Environment* **2020**, *222*, doi:10.1016/j.atmosenv.2019.117149.
187. Pham, N.D.; Kuriyama, Y.; Kasai, N.; Okazaki, S.; Suzuki, K.; Nguyen, D.T. A New Analysis of Wind on Chloride Deposition for Long-Term Aerosol Chloride Deposition Monitoring with Weekly Sampling Frequency. *Atmospheric Environment* **2019**, *198*, 46–54, doi:10.1016/j.atmosenv.2018.10.033.
188. Plaisance, H.; Mocho, P.; Gross, A.; Desauziers, V. Potential of Static Sampling Using Solid-Phase Microextraction for the Assessment of Formaldehyde Sorption on Building Materials. *Atmospheric Environment* **2019**, *218*, doi:10.1016/j.atmosenv.2019.117009.

189. Rawat, P.; Sarkar, S.; Jia, S.; Khillare, P.S.; Sharma, B. Regional Sulfate Drives Long-Term Rise in AOD over Megacity Kolkata, India. *Atmospheric Environment* **2019**, *209*, 167–181, doi:10.1016/j.atmosenv.2019.04.031.
190. Siciliano, B.; da Silva, C.M.; de Melo, T.C.C.; Vicentini, P.C.; Arbilla, G. An Analysis of Speciated Hydrocarbons in Hydrous Ethanol (H100) and Ethanol-Gasoline Blend (E22) for Vehicle Exhaust Emissions. *Atmospheric Environment* **2022**, *285*, doi:10.1016/j.atmosenv.2022.119248.
191. Tang, L.; Xue, X.; Jia, M.; Jing, H.; Wang, T.; Zhen, R.; Huang, M.; Tian, J.; Guo, J.; Li, L.; et al. Iron and Steel Industry Emissions and Contribution to the Air Quality in China. *Atmospheric Environment* **2020**, *237*, doi:10.1016/j.atmosenv.2020.117668.
192. Wu, J.; Kong, S.; Yan, Y.; Cheng, Y.; Yan, Q.; Liu, D.; Wang, S.; Zhang, X.; Qi, S. The Toxicity Emissions and Spatialized Health Risks of Heavy Metals in PM<sub>2.5</sub> from Biomass Fuels Burning. *Atmospheric Environment* **2022**, *284*, doi:10.1016/j.atmosenv.2022.119178.
193. Fukusaki, Y.; Kousa, Y.; Umehara, M.; Ishida, M.; Sato, R.; Otagiri, K.; Hoshi, J.; Nudejima, C.; Takahashi, K.; Nakai, S. Source Region Identification and Source Apportionment of Volatile Organic Compounds in the Tokyo Bay Coastal Area, Japan. *Atmospheric Environment: X* **2021**, *9*, doi:10.1016/j.aeaoa.2021.100103.
194. Vogel, J.M.; Lucheta, R.; Zinn, B.; Trigg, J. Development of Fire Model Source Terms and Effects in the Hazard Prediction and Assessment Capability (HPAC) Atmospheric Transport and Dispersion Code. *Atmospheric Environment: X* **2022**, *14*, doi:10.1016/j.aeaoa.2022.100166.
195. Baek, K.-M.; Kim, M.-J.; Kim, J.-Y.; Seo, Y.-K.; Baek, S.-O. Characterization and Health Impact Assessment of Hazardous Air Pollutants in Residential Areas near a Large Iron-Steel Industrial Complex in Korea. *Atmospheric Pollution Research* **2020**, *11*, 1754–1766, doi:10.1016/j.apr.2020.07.009.
196. Berberler, E.; Gemici, B.T.; Uzun Özel, H.; Demir, T.; Karakaş, D. Source Identification of Water-Insoluble Single Particulate Matters in Rain Sequences. *Atmospheric Pollution Research* **2022**, *13*, doi:10.1016/j.apr.2022.101499.
197. He, J.; Zhao, M.; Zhang, B.; Wang, P.; Zhang, D.; Wang, M.; Liu, B.; Li, N.; Yu, K.; Zhang, Y.; et al. The Impact of Steel Emissions on Air Quality and Pollution Control Strategy in Caofeidian, North China. *Atmospheric Pollution Research* **2020**, *11*, 1238–1247, doi:10.1016/j.apr.2020.04.012.
198. Jabłońska, M.; Janeczek, J. Identification of Industrial Point Sources of Airborne Dust Particles in an Urban Environment by a Combined Mineralogical and Meteorological Analyses: A Case Study from the Upper Silesian Conurbation, Poland. *Atmospheric Pollution Research* **2019**, *10*, 980–988, doi:10.1016/j.apr.2019.01.006.
199. Lin, Y.-C.; Hsu, S.-C.; Lin, S.-H.; Huang, Y.-T. Metallic Elements Emitted from Industrial Sources in Taiwan: Implications for Source Identification Using Airborne PM. *Atmospheric Pollution Research* **2020**, *11*, 766–775, doi:10.1016/j.apr.2020.01.005.

200. Tsai, P.-J.; Young, L.-H.; Hwang, B.-F.; Lin, M.-Y.; Chen, Y.-C.; Hsu, H.-T. Source and Health Risk Apportionment for PM<sub>2.5</sub> Collected in Sha-Lu Area, Taiwan. *Atmospheric Pollution Research* **2020**, *11*, 851–858, doi:10.1016/j.apr.2020.01.013.
201. Yang, Y.; Zhao, L.; Xie, Y.; Wang, C.; Xue, J. China's COVID-19 Lockdown Challenges the Ultralow Emission Policy. *Atmospheric Pollution Research* **2021**, *12*, 395–403, doi:10.1016/j.apr.2020.12.001.
202. Zhang, H.; Sun, W.; Li, W.; Wang, Y. Physical and Chemical Characterization of Fugitive Particulate Matter Emissions of the Iron and Steel Industry. *Atmospheric Pollution Research* **2022**, *13*, doi:10.1016/j.apr.2021.101272.
203. Michael, D.R.; Blanchard, W.; Scheele, B.C.; Lindenmayer, D.B. Comparative Use of Active Searches and Artificial Refuges to Detect Amphibians in Terrestrial Environments. *Austral Ecology* **2019**, *44*, 327–338, doi:10.1111/aec.12677.
204. Refiadi, G.; Aisyah, I.S.; Siregar, J.P. Trends in Lightweight Automotive Materials for Improving Fuel Efficiency and Reducing Carbon Emissions. *Automotive Experiences* **2019**, *2*, 78–90, doi:10.31603/ae.v2i3.2984.
205. Jaeman, S.; Nurulhuda, K.; Amin, A.M.; Sulaiman, M.F.; Man, H.C.; Mustafah, A.M.; Gusni, N.S. Feasibility Study of 3D Printed Materials for an Ammonia Emission Passive Sampler. *Basrah Journal of Agricultural Sciences* **2021**, *34*, 11–20, doi:10.37077/25200860.2021.34.SP1.2.
206. Aiello, L.; Hanzu, I.; Gstrein, G.; Ewert, E.; Ellersdorfer, C.; Sinz, W. Analysis and Investigation of Thermal Runaway Propagation for a Mechanically Constrained Lithium-Ion Pouch Cell Module. *Batteries* **2021**, *7*, doi:10.3390/batteries7030049.
207. Yeşiltepe, S.; Buğdaycı, M.; Yücel, O.; Şeşen, M.K. Recycling of Alkaline Batteries via a Carbothermal Reduction Process. *Batteries* **2019**, *5*, doi:10.3390/batteries5010035.
208. Bardyshev, O.A.; Popov, V.A.; Korovin, S.K.; Filin, A.N. Monitoring of Technical Condition of Technical Devices at Hazardous Production Facilities. *Bezopasnost' Truda v Promyshlennosti* **2020**, *2020*, 52–56, doi:10.24000/0409-2961-2020-1-52-56.
209. Ivanov, N.N.; Syromyatnikov, S.A.; Ivanova, E.A.; Medvedev, A.V. To the Use of Thermal Imagers in Solving the Topical Problems of Thermal Physics at a Metallurgical Enterprise. *Bezopasnost' Truda v Promyshlennosti* **2021**, *2021*, 7–12, doi:10.24000/0409-2961-2021-5-7-12.
210. Kantyukov, R.R.; Zapevalov, D.N.; Vagapov, R.K. Hazard Assessment of the Internal Carbon Dioxide Corrosion of the Field Pipelines at the Gas and Gas Condensate Fields. *Bezopasnost' Truda v Promyshlennosti* **2021**, *2021*, 56–62, doi:10.24000/0409-2961-2021-2-56-62.
211. Solovyev, S.A. Stochastic Safety Analysis of the Installation of Reinforced Concrete Structural Elements. *Bezopasnost' Truda v Promyshlennosti* **2020**, *2020*, 31–37, doi:10.24000/0409-2961-2020-2-31-37.
212. Sukhorukov, V.V.; Kotelnikov, V.S. Monitoring of Steel Ropes Condition with Technical Diagnostics Automated Means. *Bezopasnost' Truda v Promyshlennosti* **2019**, *2019*, 72–81, doi:10.24000/0409-2961-2019-9-72-81.

213. Volokhovskiy, V.Y.; Vorontsov, A.N.; Shpakov, I.I.; Goncharov, V.V. Analysis of the Operational Reliability of the Hot-Metal Crane Cargo Ropes in Steelmaking. *Bezopasnost' Truda v Promyshlennosti* **2020**, *2020*, 7–16, doi:10.24000/0409-2961-2020-5-7-16.
214. Mambetov, R.F.; Svintsov, V.A.; Kushnarenko, V.M. Field Tests of Steel Pipes at the Hydrogen Sulfide-Containing Deposit. *Bezopasnost' Truda v Promyshlennosti* **2019**, *2019*, 49–55, doi:10.24000/0409-2961-2019-7-49-55.
215. Azzi, E.S.; Karlton, E.; Sundberg, C. Life Cycle Assessment of Urban Uses of Biochar and Case Study in Uppsala, Sweden. *Biochar* **2022**, *4*, doi:10.1007/s42773-022-00144-3.
216. Massuque, J.; Sanchez, J.Y.S.C.; Loureiro, B.A.; Setter, C.; Lima, M.D.R.; da Silva, P.H.M.; de Paula Protásio, T.; Hein, P.R.G.; Trugilho, P.F. Evaluating the Potential of Non-Commercial Eucalyptus Spp. and Corymbia Spp. for Bioenergy in Brazil. *Bioenergy Research* **2022**, doi:10.1007/s12155-022-10502-5.
217. Maaoui, H.; Leblanc, V.; Gueuné, H.; Guhel, Y.; Boudart, B. Evolution over Time of Mackinawite Generated on Carbon Steel by the SRB Metabolic Activity: An in-Operando Raman Study. *Biofouling* **2022**, *38*, 271–285, doi:10.1080/08927014.2022.2058935.
218. Vinagre, P.A.; Lindén, J.B.; Mardaras, E.; Pinori, E.; Svenson, J. Probing the Correlation between Corrosion Resistance and Biofouling of Thermally Sprayed Metallic Substrata in the Field. *Biofouling* **2022**, *38*, 147–161, doi:10.1080/08927014.2022.2033736.
219. Want, A.; Bell, M.C.; Harris, R.E.; Hull, M.Q.; Long, C.R.; Porter, J.S. Sea-Trial Verification of a Novel System for Monitoring Biofouling and Testing Anti-Fouling Coatings in Highly Energetic Environments Targeted by the Marine Renewable Energy Industry. *Biofouling* **2021**, *37*, 433–451, doi:10.1080/08927014.2021.1928091.
220. Capaz, R.S.; Guida, E.; Seabra, J.E.A.; Osseweijer, P.; Posada, J.A. Mitigating Carbon Emissions through Sustainable Aviation Fuels: Costs and Potential. *Biofuels, Bioproducts and Biorefining* **2021**, *15*, 502–524, doi:10.1002/bbb.2168.
221. Schott, F.; Baumbach, G.; Straub, D.; Thorwarth, H.; Vogt, U. Novel Metal Mesh Filter Equipped with Pulse-Jet Regeneration for Small-Scale Biomass Boilers. *Biomass and Bioenergy* **2022**, *163*, doi:10.1016/j.biombioe.2022.106520.
222. Umasankar, S.; Tamizhdurai, P.; Santhana krishnan, P.; Narayanan, S.; Mangesh, V.L.; Shanthi, K. Effect of Copper on NiCu Bimetallic Catalyst Supported on SBA-16 for the Catalytic Hydrogenation of 5-Hydroxymethylfurfural to 2,5-Dimethylfuran. *Biomass and Bioenergy* **2020**, *143*, doi:10.1016/j.biombioe.2020.105868.
223. Hammerschmid, M.; Müller, S.; Fuchs, J.; Hofbauer, H. Evaluation of Biomass-Based Production of below Zero Emission Reducing Gas for the Iron and Steel Industry. *Biomass Conversion and Biorefinery* **2021**, *11*, 169–187, doi:10.1007/s13399-020-00939-z.

224. Mofidabadi, A.H.J.; Dehghani, A.; Bahlakeh, G.; Ramezanzadeh, B. Combined Clove Extract Bio-Molecules and Zinc(II) Ion Synergistic Effects in Steel Corrosion Mitigation in Saline Solution: Electronic (DFT) Modeling, Atomic/Molecular (MC/MD) Simulations, and Corrosion Measurement. *Biomass Conversion and Biorefinery* **2022**, doi:10.1007/s13399-022-03002-1.
225. Zhu, Z.; Zhang, W.; Zhang, D.; Gao, Z.; Qi, J.; Wei, F.; Meng, Q.; Ren, Y.; Chai, L.; Sun, Z.; et al. Experimental Study of Quenching Behavior of Quenchant Prepared from Gutter Oil at Different Oil Bath Temperatures. *Biomass Conversion and Biorefinery* **2022**, doi:10.1007/s13399-022-03133-5.
226. Masvingwe, N.P.; Jamal-Ally, S.F. Determination of Bacterial Intracellular and Extracellular Biotransformation Compounds and Biodegradation of Kerosene Based Industrial Rolling Oils via Gas Chromatography-Mass Spectrometry. *Bioremediation Journal* **2019**, *23*, 154–174, doi:10.1080/10889868.2019.1642846.
227. Ghysels, S.; Buffel, S.; Rabaey, K.; Ronsse, F.; Ganigué, R. Biochar and Activated Carbon Enhance Ethanol Conversion and Selectivity to Caproic Acid by *Clostridium Kluyveri*. *Bioresource Technology* **2021**, *319*, doi:10.1016/j.biortech.2020.124236.
228. Gupta, D.; Mahajani, S.M.; Garg, A. Hydrothermal Carbonization of Household Wet Waste – Characterization of Hydrochar and Process Wastewater Stream. *Bioresource Technology* **2021**, *342*, doi:10.1016/j.biortech.2021.125972.
229. Shahid, K.; Ramasamy, D.L.; Kaur, P.; Sillanpää, M.; Pihlajamäki, A. Effect of Modified Anode on Bioenergy Harvesting and Nutrients Removal in a Microbial Nutrient Recovery Cell. *Bioresource Technology* **2021**, *332*, doi:10.1016/j.biortech.2021.125077.
230. Zhang, Z.; Song, Y.; Zheng, S.; Zhen, G.; Lu, X.; Takuro, K.; Xu, K.; Bakonyi, P. Electro-Conversion of Carbon Dioxide (CO<sub>2</sub>) to Low-Carbon Methane by Bioelectromethanogenesis Process in Microbial Electrolysis Cells: The Current Status and Future Perspective. *Bioresource Technology* **2019**, *279*, 339–349, doi:10.1016/j.biortech.2019.01.145.
231. Ozbey Unal, B.; Dizge, N.; Karagunduz, A.; Keskinler, B. Combined Electrocoagulation and Electrooxidation Process in Electro Membrane Bioreactor to Improve Membrane Filtration Effectiveness. *Bioresource Technology Reports* **2019**, *7*, doi:10.1016/j.biteb.2019.100237.
232. Verma, M.; Verma, M.K.; Singh, V.; Singh, J.; Singh, V.; Mishra, V. Advancements in Applicability of Microbial Fuel Cell for Energy Recovery from Human Waste. *Bioresource Technology Reports* **2022**, *17*, doi:10.1016/j.biteb.2022.100978.
233. Kaur, P.J.; Yadav, P.; Gupta, M.; Khandegar, V.; Jain, A. Bamboo as a Source for Value Added Products: Paving Way to Global Circular Economy. *BioResources* **2022**, *17*, 5437–5463, doi:10.15376/biores.17.3.kaur.
234. Korčok, M.; Koleda, P.; Barčík, Š.; Očkajová, A.; Kučerka, M. Effect of Technological and Material Parameters on Final Surface Quality of Machining When Milling Thermally Treated Spruce Wood. *BioResources* **2019**, *14*, 10004–

- 10013, doi:10.15376/biores.14.4.10004-10013.
235. Scouse, A.A.; Kelley, S.S.; Venditti, R.A.; McConnell, T.E. Evaluating Sustainable Product Alternatives by Combining Life Cycle Assessment with Full-Cost Accounting: A Highway Guardrail Case Study. *BioResources* **2020**, *15*, 9103–9127, doi:10.15376/biores.15.4.9103-9127.
236. Karoshi, G.; Kolar, P.; Shah, S.B.; Gilleskie, G. Recycled Eggshells as Precursors for Iron-Impregnated Calcium Oxide Catalysts for Partial Oxidation of Methane. *Bioresources and Bioprocessing* **2020**, *7*, doi:10.1186/s40643-020-00336-4.
237. Jin, P.; Gu, Y.; Shi, X.; Yang, W. Non-Negligible Greenhouse Gases from Urban Sewer System. *Biotechnology for Biofuels* **2019**, *12*, doi:10.1186/s13068-019-1441-8.
238. Amoruso, F.M.; Schuetze, T. Hybrid Timber-Based Systems for Low-Carbon, Deep Renovation of Aged Buildings: Three Exemplary Buildings in the Republic of Korea. *Building and Environment* **2022**, *214*, doi:10.1016/j.buildenv.2022.108889.
239. Amoruso, F.M.; Schuetze, T. Life Cycle Assessment and Costing of Carbon Neutral Hybrid-Timber Building Renovation Systems: Three Applications in the Republic of Korea. *Building and Environment* **2022**, *222*, doi:10.1016/j.buildenv.2022.109395.
240. Balasbaneh, A.T.; Sher, W. Comparative Sustainability Evaluation of Two Engineered Wood-Based Construction Materials: Life Cycle Analysis of CLT versus GLT. *Building and Environment* **2021**, *204*, doi:10.1016/j.buildenv.2021.108112.
241. Blanco, J.M.; Buruaga, A.; Cuadrado, J.; Zapico, A. Assessment of the Influence of Façade Location and Orientation in Indoor Environment of Double-Skin Building Envelopes with Perforated Metal Sheets. *Building and Environment* **2019**, *163*, doi:10.1016/j.buildenv.2019.106325.
242. Chen, W.; Yang, S.; Zhang, X.; Jordan, N.D.; Huang, J. Embodied Energy and Carbon Emissions of Building Materials in China. *Building and Environment* **2022**, *207*, doi:10.1016/j.buildenv.2021.108434.
243. Dong, Y.; Ng, S.T.; Liu, P. A Comprehensive Analysis towards Benchmarking of Life Cycle Assessment of Buildings Based on Systematic Review. *Building and Environment* **2021**, *204*, doi:10.1016/j.buildenv.2021.108162.
244. Duan, Z.; Huang, Q.; Zhang, Q. Life Cycle Assessment of Mass Timber Construction: A Review. *Building and Environment* **2022**, *221*, doi:10.1016/j.buildenv.2022.109320.
245. Kröhnert, H.; Itten, R.; Stucki, M. Comparing Flexible and Conventional Monolithic Building Design: Life Cycle Environmental Impact and Potential for Material Circulation. *Building and Environment* **2022**, *222*, doi:10.1016/j.buildenv.2022.109409.
246. Li, Y.L.; Han, M.Y.; Liu, S.Y.; Chen, G.Q. Energy Consumption and Greenhouse Gas Emissions by Buildings: A Multi-Scale Perspective. *Building and Environment* **2019**, *151*, 240–250, doi:10.1016/j.buildenv.2018.11.003.
247. Liu, S.; Zhang, J.; Li, J.; Li, Y.; Zhang, J.; Wu, X. Simulating and Mitigating Extreme

- Urban Heat Island Effects in a Factory Area Based on Machine Learning. *Building and Environment* **2021**, *202*, doi:10.1016/j.buildenv.2021.108051.
248. Mannan, M.; Al-Ghamdi, S.G. Investigating Environmental Life Cycle Impacts of Active Living Wall for Improved Indoor Air Quality. *Building and Environment* **2022**, *208*, doi:10.1016/j.buildenv.2021.108595.
  249. Morris, F.; Allen, S.; Hawkins, W. On the Embodied Carbon of Structural Timber versus Steel, and the Influence of LCA Methodology. *Building and Environment* **2021**, *206*, doi:10.1016/j.buildenv.2021.108285.
  250. Roque, E.; Vicente, R.; Almeida, R.M.S.F. Opportunities of Light Steel Framing towards Thermal Comfort in Southern European Climates: Long-Term Monitoring and Comparison with the Heavyweight Construction. *Building and Environment* **2021**, *200*, doi:10.1016/j.buildenv.2021.107937.
  251. Saade, M.R.M.; Guest, G.; Amor, B. Comparative Whole Building LCAs: How Far Are Our Expectations from the Documented Evidence? *Building and Environment* **2020**, *167*, doi:10.1016/j.buildenv.2019.106449.
  252. Sakamoto, M.; Li, M.; Kuga, K.; Ito, K.; Bekö, G.; Williams, J.; Wargocki, P. CO<sub>2</sub> Emission Rates from Sedentary Subjects under Controlled Laboratory Conditions. *Building and Environment* **2022**, *211*, doi:10.1016/j.buildenv.2021.108735.
  253. Teng, Y.; Pan, W. Estimating and Minimizing Embodied Carbon of Prefabricated High-Rise Residential Buildings Considering Parameter, Scenario and Model Uncertainties. *Building and Environment* **2020**, *180*, doi:10.1016/j.buildenv.2020.106951.
  254. Yu, M.; Robati, M.; Oldfield, P.; Wiedmann, T.; Crawford, R.; Nezhad, A.A.; Carmichael, D. The Impact of Value Engineering on Embodied Greenhouse Gas Emissions in the Built Environment: A Hybrid Life Cycle Assessment. *Building and Environment* **2020**, *168*, doi:10.1016/j.buildenv.2019.106452.
  255. Zhan, Q.; Xiao, Y.; Musso, F.; Zhang, L. Assessing the Hygrothermal Performance of Typical Lightweight Steel-Framed Wall Assemblies in Hot-Humid Climate Regions by Monitoring and Numerical Analysis. *Building and Environment* **2021**, *188*, doi:10.1016/j.buildenv.2020.107512.
  256. Zou, Z.; He, J.; Yang, X. An Experimental Method for Measuring VOC Emissions from Individual Human Whole-Body Skin under Controlled Conditions. *Building and Environment* **2020**, *181*, doi:10.1016/j.buildenv.2020.107137.
  257. Lyu, Y.; Chow, T.-T. Economic, Energy and Environmental Life Cycle Assessment of a Liquid Flow Window in Different Climates. *Building Simulation* **2020**, *13*, 837–848, doi:10.1007/s12273-020-0636-z.
  258. Bashir, S.; Salam, A.; Rehman, M.; Khan, S.; Gulshan, A.B.; Iqbal, J.; Shaaban, M.; Mehmood, S.; Zahra, A.; Hu, H. Effective Role of Biochar, Zeolite and Steel Slag on Leaching Behavior of Cd and Its Fractionations in Soil Column Study. *Bulletin of Environmental Contamination and Toxicology* **2019**, *102*, 567–572, doi:10.1007/s00128-019-02573-6.
  259. Nguyen Thi, H.; Nguyen Thi Thu, T.; Pham Hai, L.; Nguyen Thanh, H.; Chu Viet,

- H.; Chu Thi, H.; Nghiem Xuan, T.; Tung, N.H. Emission of Unintentionally Produced Persistent Organic Pollutants from Some Industrial Processes in Northern Vietnam. *Bulletin of Environmental Contamination and Toxicology* **2019**, *102*, 287–296, doi:10.1007/s00128-018-2519-x.
260. Xia, X.; Xiang, L.; Tong, Y.; Shao, F.; Li, B.; Sun, Y.; Zhang, H. Bioaccessibility of Metals in Soils at Typical Legacy Industrial Sites: In Vitro Evaluation Using Physiologically-Based Extraction. *Bulletin of Environmental Contamination and Toxicology* **2022**, *109*, 578–584, doi:10.1007/s00128-022-03468-9.
261. Xie, M.; Zhang, S.; Cui, Z.; Cao, X. Distribution Characteristics and Risk Assessment of Polycyclic Aromatic Hydrocarbons in Soils of a Steel Enterprise in East China. *Bulletin of Environmental Contamination and Toxicology* **2021**, *106*, 873–877, doi:10.1007/s00128-021-03193-9.
262. Epifanova, E.A. Definition of Deformations of Steel Vertical Cylindrical Reservoir with Volume of  $V=10000$  M3 for Oil Using Terrestrial Laser Scanning. *Bulletin of the Tomsk Polytechnic University, Geo Assets Engineering* **2020**, *331*, 78–87, doi:10.18799/24131830/2020/11/2887.
263. Fedosov, A.V.; Abdrakhmanov, N.Kh.; Vadulina, N.V.; Khafizova, D.F.; Abdrakhmanova, K.N. Diagnosis of Vertical Steel Tanks as a Tool to Improve Safety Operation of Oil and Gas Facilities. *Bulletin of the Tomsk Polytechnic University, Geo Assets Engineering* **2019**, *330*, 75–81, doi:10.18799/24131830/2019/12/2394.
264. Zavorin, A.S.; Lyubimova, L.L.; Buvakov, K.V.; Shmitov, D.M.; Artamontsev, A.I. Corrosion Problems and Physical-Mechanical Models of Structural Materials Failure for Power Plant Engineering. *Bulletin of the Tomsk Polytechnic University, Geo Assets Engineering* **2019**, *330*, 163–171, doi:10.18799/24131830/2019/11/2362.
265. Zavorin, A.S.; Lyubimova, L.L.; Buvakov, K.V.; Tashlykov, A.A.; Fisenko, R.N. Aspects of Evolution of Metal Nanoscale Characteristics during Thermal Cycling. *Bulletin of the Tomsk Polytechnic University, Geo Assets Engineering* **2020**, *331*, 7–15, doi:10.18799/24131830/2020/8/2762.
266. Zavorin, A.S.; Lyubimova, L.L.; Buvakov, K.V.; Fisenko, R.N.; Tashlykov, A.A.; Artamontsev, A.I. Root-Mean-Square Deviations of Atomic Positions - Nanoscale Indicator of Surface Condition. *Bulletin of the Tomsk Polytechnic University, Geo Assets Engineering* **2020**, *331*, 37–47, doi:10.18799/24131830/2020/11/2884.
267. Zhang, Y.-J.; Shi, W.; Jiang, L. Does China's Carbon Emissions Trading Policy Improve the Technology Innovation of Relevant Enterprises? *Business Strategy and the Environment* **2020**, *29*, 872–885, doi:10.1002/bse.2404.
268. Chérifi, W.N.E.H.; Houmadi, Y.; Aissa Mamoune, S.M. Prediction of Corrosion Potential Using the Generalized Artificial Neural Networks Method. *Canadian Journal of Civil Engineering* **2022**, *49*, 1040–1048, doi:10.1139/cjce-2020-0712.
269. Shakir, Q.M. Behavior of High-Performance RC Composite Corbels with Inclined Stirrups. *Canadian Journal of Civil Engineering* **2022**, *49*, 18–30, doi:10.1139/cjce-2020-0149.



270. Howard, C.; Dymond, C.C.; Griess, V.C.; Tolkien-Spurr, D.; van Kooten, G.C. Wood Product Carbon Substitution Benefits: A Critical Review of Assumptions. *Carbon Balance and Management* **2021**, *16*, doi:10.1186/s13021-021-00171-w.
271. Myllyviita, T.; Hurmekoski, E.; Kunttu, J. Substitution Impacts of Nordic Wood-Based Multi-Story Building Types: Influence of the Decarbonization of the Energy Sector and Increased Recycling of Construction Materials. *Carbon Balance and Management* **2022**, *17*, doi:10.1186/s13021-022-00205-x.
272. Hančlová, J.; Zapletal, F.; Šmíd, M. On Interaction between Carbon Spot Prices and Czech Steel Industry. *Carbon Management* **2020**, *11*, 121–137, doi:10.1080/17583004.2020.1712262.
273. Jajal, P.; Mishra, T. Temperature Change and Mitigation Potential of Indian Cement Industry. *Carbon Management* **2022**, *13*, 341–351, doi:10.1080/17583004.2022.2085175.
274. Yu, J.L.; Lee, H.S.; Kim, J.D. Analysis of Korean Firms' Green Productivity Using the MML Model. *Carbon Management* **2020**, *11*, 1–9, doi:10.1080/17583004.2019.1656504.
275. Zapletal, F. On Influence of Emissions Trading on Efficiency of the EU National Steel Sectors. *Carbon Management* **2021**, *12*, 249–264, doi:10.1080/17583004.2021.1904328.
276. Zhao, Y.; Zhou, J.; Fan, Y.; Feng, M.; Zhang, Z. Economic and Environmental Impacts of China's Imported Iron Ore Transport Chain under Road-to-Rail Policy: An Empirical Analysis Based on the Bohai Economic Rim. *Carbon Management* **2020**, *11*, 653–671, doi:10.1080/17583004.2020.1840874.
277. Niel, J.; Weiss, B.; Wukovits, W. Model of an Iron Ore Sinter Plant with Selective Waste Gas Recirculation. *Carbon Resources Conversion* **2022**, *5*, 71–83, doi:10.1016/j.crcon.2022.01.001.
278. Schoeman, Y.; Oberholster, P.; Somerset, V. A Decision-Support Framework for Industrial Waste Management in the Iron and Steel Industry: A Case Study in Southern Africa. *Case Studies in Chemical and Environmental Engineering* **2021**, *3*, doi:10.1016/j.cscee.2021.100097.
279. Rehman, M.H.U.; Noor, T.; Iqbal, N. Effect of Zirconia on Hydrothermally Synthesized Co<sub>3</sub>O<sub>4</sub>/TiO<sub>2</sub> Catalyst for NO<sub>x</sub> Reduction from Engine Emissions. *Catalysts* **2020**, *10*, doi:10.3390/catal10020209.
280. Gonçalves, S.L.A.; Garcia, E.M.; Tarôco, H.A.; Matencio, T. Obtaining Mn-Co Alloys in AISI 430 Steel from Lithium-Ion Battery Recycling: Application in SOFC Interconnectors. *ChemEngineering* **2020**, *4*, 1–13, doi:10.3390/chemengineering4010010.
281. Sundhararasu, E.; Tuomikoski, S.; Runtti, H.; Hu, T.; Varila, T.; Kangas, T.; Lassi, U. Alkali-Activated Adsorbents from Slags: Column Adsorption and Regeneration Study for Nickel(II) Removal. *ChemEngineering* **2021**, *5*, doi:10.3390/chemengineering5010013.
282. da Silva, E.; Oliveira, E.; Ribeiro, A.; Garcia, R.; Napoleao, D.; Sanz, O.; Almeida,

- L. A Brass-Mesh Structured Photoreactor Applied in the Photocatalytic Degradation of RB5 Dye. *Chemical Engineering and Processing - Process Intensification* **2022**, *174*, doi:10.1016/j.cep.2022.108895.
283. Kamel, M.; El-Ashtoukhy, E.-S.Z.; Abdel-Aziz, M.H.; Zahran, R.R.; Sedahmed, G.H.; El Gheriany, I. Effect of Additives and Electrode Roughness on the Production of Hypochlorite Sanitizer by the Electrolysis of NaCl Solution in a Batch Recycle Reactor. *Chemical Engineering and Processing - Process Intensification* **2022**, *176*, doi:10.1016/j.cep.2022.108959.
284. Owais, M.; Yazdani, M.R.; Järvinen, M. Detailed Performance Analysis of the Wet Extractive Grinding Process for Higher Calcium Yields from Steelmaking Slags. *Chemical Engineering and Processing - Process Intensification* **2021**, *166*, doi:10.1016/j.cep.2021.108489.
285. Qiu, L.; Sang, D.; Feng, Y.; Huang, H.; Zhang, X. Study on Heat Transfer of Process Intensification in Moving Bed Reactor Based on the Discrete Element Method. *Chemical Engineering and Processing - Process Intensification* **2020**, *151*, doi:10.1016/j.cep.2020.107915.
286. Ansaloni, L.; Hartono, A.; Awais, M.; Knuutila, H.K.; Deng, L. CO<sub>2</sub> Capture Using Highly Viscous Amine Blends in Non-Porous Membrane Contactors. *Chemical Engineering Journal* **2019**, *359*, 1581–1591, doi:10.1016/j.cej.2018.11.014.
287. Azmi, S.; Klimek, A.; Frackowiak, E. Anticorrosive Performance of Green Deep Eutectic Solvent for Electrochemical Capacitor. *Chemical Engineering Journal* **2022**, *444*, doi:10.1016/j.cej.2022.136594.
288. Behraves, E.; Eränen, K.; Kumar, N.; Peltonen, J.; Peurla, M.; Aho, A.; Nurmi, M.; Toivakka, M.; Murzin, D.Y.; Salmi, T. Microreactor Coating with Au/Al<sub>2</sub>O<sub>3</sub> Catalyst for Gas-Phase Partial Oxidation of Ethanol: Physico-Chemical Characterization and Evaluation of Catalytic Properties. *Chemical Engineering Journal* **2019**, *378*, doi:10.1016/j.cej.2019.122179.
289. Chen, C.; Yang, W.; Bai, Y.; Zhou, Y.; Cao, X.; Ma, Z.; Cai, M.; Zhang, B.; Chen, Q.; Zhou, F.; et al. Dynamic Oil Gels Constructed by 1,2-Dithiolane-Containing Telechelic Polymers: An Efficient and Versatile Platform for Fabricating Polymer-Inorganic Composites toward Tribological Applications. *Chemical Engineering Journal* **2022**, *430*, doi:10.1016/j.cej.2021.133097.
290. Chen, P.; Wu, J.; Fei, H.; He, H.; Cao, S.; Zuo, L.; Jin, Y.; Zhang, L.; Du, S. Acoustofluidics-Manipulated Triple-Emission Fluorescent Nanoprobe Aggregates with Multicolor-Variation for Colorimetric Quantitative Assay. *Chemical Engineering Journal* **2022**, *441*, doi:10.1016/j.cej.2022.135976.
291. Chen, S.-W.; Lu, P.; Zhao, Z.-Y.; Deng, C.; Wang, Y.-Z. Recyclable Strong and Tough Polyamide Adhesives via Noncovalent Interactions Combined with Energy-Dissipating Soft Segments. *Chemical Engineering Journal* **2022**, *446*, doi:10.1016/j.cej.2022.137304.
292. Funck, M.; Al-Azzawi, M.M.S.; Yildirim, A.; Knoop, O.; Schmidt, T.C.; Drewes, J.E.; Tuerk, J. Release of Microplastic Particles to the Aquatic Environment via

- Wastewater Treatment Plants: The Impact of Sand Filters as Tertiary Treatment. *Chemical Engineering Journal* **2021**, *426*, doi:10.1016/j.cej.2021.130933.
293. Jian, G.; Meng, Q.; Jiao, Y.; Feng, L.; Shao, H.; Wang, F.; Meng, F. Hybrid PDMS-TiO<sub>2</sub>-Stainless Steel Textiles for Triboelectric Nanogenerators. *Chemical Engineering Journal* **2021**, *417*, doi:10.1016/j.cej.2020.127974.
294. Liu, W.; Teng, L.; Rohani, S.; Qin, Z.; Zhao, B.; Xu, C.C.; Ren, S.; Liu, Q.; Liang, B. CO<sub>2</sub> Mineral Carbonation Using Industrial Solid Wastes: A Review of Recent Developments. *Chemical Engineering Journal* **2021**, *416*, doi:10.1016/j.cej.2021.129093.
295. Liu, Z.; Wang, L.; Jiang, Y.; Lv, Y.; Zhu, C.; Liu, F.; Li, A. Dialysis Technology Supporting the Preparation of Acid-Resistant Picolylamine-Based Hydrogel Sphere for Selectively Recycling Copper, Nickel and Cobalt from Strongly Acidic Wastewaters. *Chemical Engineering Journal* **2022**, *450*, doi:10.1016/j.cej.2022.138329.
296. Luo, X.; Guo, X.; Xia, X.; Zhang, X.; Ma, N.; Leng, S.; Ullah, S.; Ayalew, Z.M. Rapid and Long-Effective Removal of Phosphate from Water by Zero-Valent Iron in Combination with Hypochlorite (ZVI/NaClO). *Chemical Engineering Journal* **2020**, *382*, doi:10.1016/j.cej.2019.122835.
297. Minette, F.; De Wilde, J. Multi-Scale Modeling and Simulation of Low-Pressure Methane Bi-Reforming Using Structured Catalytic Reactors. *Chemical Engineering Journal* **2021**, *407*, doi:10.1016/j.cej.2020.127218.
298. Motamedi, M.; Ramezanzadeh, M.; Ramezanzadeh, B.; Mahdavian, M. One-Pot Synthesis and Construction of a High Performance Metal-Organic Structured Nano Pigment Based on Nanoceria Decorated Cerium (III)-Imidazole Network (NC/CIN) for Effective Epoxy Composite Coating Anti-Corrosion and Thermo-Mechanical Properties Improvement. *Chemical Engineering Journal* **2020**, *382*, doi:10.1016/j.cej.2019.122820.
299. Natsui, S.; Hirai, A.; Terui, K.; Kashihara, Y.; Murao, A.; Miki, Y.; Nogami, H. Impact of High-Temperature Non-Uniform Degradation on Fines Clogging and Gas Flow in a Coke Bed. *Chemical Engineering Journal* **2022**, *427*, doi:10.1016/j.cej.2021.131484.
300. Nie, J.; Huang, H.; Rao, P.; Chen, H.; Du, X.; Wang, Z.; Zhang, W.; Liang, H. Composite Functional Particle Enhanced Gravity Driven Ceramic Membrane Bioreactor for Simultaneous Removal of Nitrogen and Phosphorus from Groundwater. *Chemical Engineering Journal* **2023**, *452*, doi:10.1016/j.cej.2022.139134.
301. Pashazadeh, R.; Sych, G.; Nasiri, S.; Leitonas, K.; Lazauskas, A.; Volyniuk, D.; Skabara, P.J.; Grazulevicius, J.V. Multifunctional Asymmetric D-A-D' Compounds: Mechanochromic Luminescence, Thermally Activated Delayed Fluorescence and Aggregation Enhanced Emission. *Chemical Engineering Journal* **2020**, *401*, doi:10.1016/j.cej.2020.125962.
302. Tang, Q.; Huang, K. Determining the Kinetic Rate Constants of Fe<sub>3</sub>O<sub>4</sub>-to-Fe and FeO-to-Fe Reduction by H<sub>2</sub>. *Chemical Engineering Journal* **2022**, *434*, doi:10.1016/j.cej.2022.134771.

303. Wang, I.; Ji, G.; Turap, Y.; Nie, H.; Li, Z.; Zhao, M.; Wang, W. A Short-Cut Chemical Looping Hydrogen Generation System by Using Iron-Based Material from Steel Industry. *Chemical Engineering Journal* **2020**, *394*, doi:10.1016/j.cej.2020.124882.
304. Wang, W.; Wang, H.; Zhao, J.; Wang, X.; Xiong, C.; Song, L.; Ding, R.; Han, P.; Li, W. Self-Healing Performance and Corrosion Resistance of Graphene Oxide–Mesoporous Silicon Layer–Nanosphere Structure Coating under Marine Alternating Hydrostatic Pressure. *Chemical Engineering Journal* **2019**, *361*, 792–804, doi:10.1016/j.cej.2018.12.124.
305. Yang, Y.; Xu, W.; Wang, Y.; Shen, J.; Wang, Y.; Geng, Z.; Wang, Q.; Zhu, T. Progress of CCUS Technology in the Iron and Steel Industry and the Suggestion of the Integrated Application Schemes for China. *Chemical Engineering Journal* **2022**, *450*, doi:10.1016/j.cej.2022.138438.
306. Zhang, J.; Zhang, C.; Song, F.; Shang, Q.; Hu, Y.; Jia, P.; Liu, C.; Hu, L.; Zhu, G.; Huang, J.; et al. Castor-Oil-Based, Robust, Self-Healing, Shape Memory, and Reprocessable Polymers Enabled by Dynamic Hindered Urea Bonds and Hydrogen Bonds. *Chemical Engineering Journal* **2022**, *429*, doi:10.1016/j.cej.2021.131848.
307. Zhang, X.; Qi, R.; Wu, A.; Sheng, K.; Lin, H. Effective Anodic Sulfide Removal Catalyzed by Single Nickel Atoms on Nitrogen-Doped Graphene with Stainless Steel Substrate. *Chemical Engineering Journal* **2022**, *427*, doi:10.1016/j.cej.2021.130963.
308. Zhang, X.; Zhang, Y.; Zhang, W.; Dai, Y.; Xia, F. Gold Nanoparticles-Deranged Double Network for Janus Adhesive-Tough Hydrogel as Strain Sensor. *Chemical Engineering Journal* **2021**, *420*, doi:10.1016/j.cej.2021.130447.
309. Le, T.T.; Hoang, V.C.; Zhang, W.; Kim, J.M.; Kim, J.; Moon, G.-H.; Kim, S.H. Mesoporous Sulfur-Modified Metal Oxide Cathodes for Efficient Electro-Fenton Systems. *Chemical Engineering Journal Advances* **2022**, *12*, doi:10.1016/j.cej.2022.100371.
310. Gawali, I.T.; Usmani, G.A. Novel Non-Ionic Gemini Surfactants from Fatty Acid and Diethanolamine: Synthesis, Surface-Active Properties and Anticorrosion Study. *Chemistry Africa* **2020**, *3*, 75–88, doi:10.1007/s42250-019-00107-5.
311. Yong, J.; Singh, S.C.; Zhan, Z.; Huo, J.; Chen, F.; Guo, C. Reducing Adhesion for Dispensing Tiny Water/Oil Droplets and Gas Bubbles by Femtosecond Laser-Treated Needle Nozzles: Superhydrophobicity, Superoleophobicity, and Superaerophobicity. *ChemNanoMat* **2019**, *5*, 241–249, doi:10.1002/cnma.201800495.
312. Amato, E.D.; Pfeiffer, F.; Estoppey, N.; Subotic, D.; Herweyers, L.; Breugelmans, T.; Weyn, M.; Du Bois, E.; Dardenne, F.; Covaci, A.; et al. Field Application of a Novel Active-Passive Sampling Technique for the Simultaneous Measurement of a Wide Range of Contaminants in Water. *Chemosphere* **2021**, *279*, doi:10.1016/j.chemosphere.2021.130598.
313. Bani-Melhem, K.; Al-Kilani, M.R.; Tawalbeh, M. Evaluation of Scrap Metallic

- Waste Electrode Materials for the Application in Electrocoagulation Treatment of Wastewater. *Chemosphere* **2023**, *310*, doi:10.1016/j.chemosphere.2022.136668.
314. Budnyak, T.M.; Onwumere, J.; Pylypchuk, I.V.; Jaworski, A.; Chen, J.; Rokicińska, A.; Lindström, M.E.; Kuśtrowski, P.; Sevastyanova, O.; Slabon, A. LignoPhot: Conversion of Hydrolysis Lignin into the Photoactive Hybrid Lignin/Bi<sub>4</sub>O<sub>5</sub>Br<sub>2</sub>/BiOBr Composite for Simultaneous Dyes Oxidation and Co<sup>2+</sup> and Ni<sup>2+</sup> Recycling. *Chemosphere* **2021**, *279*, doi:10.1016/j.chemosphere.2021.130538.
315. Cai, H.; Chen, M.; Chen, Q.; Du, F.; Liu, J.; Shi, H. Microplastic Quantification Affected by Structure and Pore Size of Filters. *Chemosphere* **2020**, *257*, doi:10.1016/j.chemosphere.2020.127198.
316. Chen, D.; Meng, Z.; Chen, Y. Toxicity Assessment of Molybdenum Slag as a Mineral Fertilizer: A Case Study with Pakchoi (*Brassica Chinensis* L.). *Chemosphere* **2019**, *217*, 816–824, doi:10.1016/j.chemosphere.2018.10.216.
317. Chen, L.; Huang, J.J.; Hua, B.; Droste, R.; Ali, S.; Zhao, W. Effect of Steel Slag in Recycling Waste Activated Sludge to Produce Anaerobic Granular Sludge. *Chemosphere* **2020**, *257*, doi:10.1016/j.chemosphere.2020.127291.
318. Ciarkowska, K.; Gambus, F.; Antonkiewicz, J.; Koliopoulos, T. Polycyclic Aromatic Hydrocarbon and Heavy Metal Contents in the Urban Soils in Southern Poland. *Chemosphere* **2019**, *229*, 214–226, doi:10.1016/j.chemosphere.2019.04.209.
319. Dien, N.T.; Hirai, Y.; Koshiba, J.; Sakai, S.-I. Factors Affecting Multiple Persistent Organic Pollutant Concentrations in the Air above Japan: A Panel Data Analysis. *Chemosphere* **2021**, *277*, doi:10.1016/j.chemosphere.2021.130356.
320. Dwivedi, K.A.; Huang, S.-J.; Wang, C.-T.; Kumar, S. Fundamental Understanding of Microbial Fuel Cell Technology: Recent Development and Challenges. *Chemosphere* **2022**, *288*, doi:10.1016/j.chemosphere.2021.132446.
321. Elaissaoui, I.; Akrouit, H.; Grassini, S.; Fulginiti, D.; Bousselmi, L. Effect of Coating Method on the Structure and Properties of a Novel PbO<sub>2</sub> Anode for Electrochemical Oxidation of Amaranth Dye. *Chemosphere* **2019**, *217*, 26–34, doi:10.1016/j.chemosphere.2018.10.161.
322. Esposito, V.; Bruno, D.; Maffei, A.; Giua, R.; Capoccia, C.; Nicosia, A.; Ficocelli, S. Long-Term Emission Sampling Validation for PCDD/Fs Control of Compliance to Permitted Emission Limit Values at a Large Sinter Plant. *Chemosphere* **2019**, *233*, 44–48, doi:10.1016/j.chemosphere.2019.05.167.
323. Fan, Y.; Ren, M.; Zhang, H.; Geng, N.; Li, Y.; Zhang, N.; Zhao, L.; Gao, Y.; Chen, J. Levels and Fingerprints of Chlorinated Aromatic Hydrocarbons in Fly Ashes from the Typical Industrial Thermal Processes: Implication for the Co-Formation Mechanism. *Chemosphere* **2019**, *224*, 298–305, doi:10.1016/j.chemosphere.2019.02.117.
324. Fouad, K.; Gar Alalm, M.; Bassyouni, M.; Saleh, M.Y. A Novel Photocatalytic Reactor for the Extended Reuse of W–TiO<sub>2</sub> in the Degradation of Sulfamethazine. *Chemosphere* **2020**, *257*, doi:10.1016/j.chemosphere.2020.127270.

325. Gomiero, A.; Øysæd, K.B.; Agustsson, T.; van Hoytema, N.; van Thiel, T.; Grati, F. First Record of Characterization, Concentration and Distribution of Microplastics in Coastal Sediments of an Urban Fjord in South West Norway Using a Thermal Degradation Method. *Chemosphere* **2019**, *227*, 705–714, doi:10.1016/j.chemosphere.2019.04.096.
326. Guerra, R.; Pasteris, A.; Righi, S.; Ok, G. Historical Record of Polychlorinated Biphenyls (PCBs) in the Continental Shelf of the Korea Strait. *Chemosphere* **2019**, *237*, doi:10.1016/j.chemosphere.2019.124438.
327. Hashimoto, K.; Kubota, N.; Okuda, T.; Nakai, S.; Nishijima, W.; Motoshige, H. Reduction of Ozone Dosage by Using Ozone in Ultrafine Bubbles to Reduce Sludge Volume. *Chemosphere* **2021**, *274*, doi:10.1016/j.chemosphere.2021.129922.
328. Kapusta, P.; Stanek, M.; Szarek-Łukaszewska, G.; Godzik, B. Long-Term Moss Monitoring of Atmospheric Deposition near a Large Steelworks Reveals the Growing Importance of Local Non-Industrial Sources of Pollution. *Chemosphere* **2019**, *230*, 29–39, doi:10.1016/j.chemosphere.2019.05.058.
329. Kim, N.; Ali, M.; Anwer, H.; Park, J.-W.; Irfan, I. Synthesis and Characterization of SSM@NiO/TiO<sub>2</sub> p-n Junction Catalyst for Bisphenol a Degradation. *Chemosphere* **2022**, *308*, doi:10.1016/j.chemosphere.2022.136425.
330. Klöckner, P.; Seiwert, B.; Weyrauch, S.; Escher, B.I.; Reemtsma, T.; Wagner, S. Comprehensive Characterization of Tire and Road Wear Particles in Highway Tunnel Road Dust by Use of Size and Density Fractionation. *Chemosphere* **2021**, *279*, doi:10.1016/j.chemosphere.2021.130530.
331. Kumar, S.S.; Kumar, A.; Singh, S.; Malyan, S.K.; Baram, S.; Sharma, J.; Singh, R.; Pugazhendhi, A. Industrial Wastes: Fly Ash, Steel Slag and Phosphogypsum-Potential Candidates to Mitigate Greenhouse Gas Emissions from Paddy Fields. *Chemosphere* **2020**, *241*, doi:10.1016/j.chemosphere.2019.124824.
332. Li, S.-W.; Chang, M.; Li, H.; Cui, X.-Y.; Ma, L.Q. Chemical Compositions and Source Apportionment of PM<sub>2.5</sub> during Clear and Hazy Days: Seasonal Changes and Impacts of Youth Olympic Games. *Chemosphere* **2020**, *256*, doi:10.1016/j.chemosphere.2020.127163.
333. Li, Y.; Yin, S.; Yu, S.; Yuan, M.; Dong, Z.; Zhang, D.; Yang, L.; Zhang, R. Characteristics, Source Apportionment and Health Risks of Ambient VOCs during High Ozone Period at an Urban Site in Central Plain, China. *Chemosphere* **2020**, *250*, doi:10.1016/j.chemosphere.2020.126283.
334. Liberatori, G.; Cotugno, P.; Sturba, L.; Vannuccini, M.L.; Capasso, G.; Velardo, R.; Besselink, H.; Massari, F.; Tursi, A.; Corbelli, V.; et al. Occurrence and Spatial Distribution of Dioxin and Dioxin-like Compounds in Topsoil of Taranto (Apulia, Italy) by GC-MS Analysis and DR-CALUX® Bioassay. *Chemosphere* **2021**, *279*, doi:10.1016/j.chemosphere.2021.130576.
335. Liu, X.; Folk, E., IV Sorption and Migration of Organophosphate Flame Retardants between Sources and Settled Dust. *Chemosphere* **2021**, *278*, doi:10.1016/j.chemosphere.2021.130415.

336. Massimi, L.; Pietrantonio, E.; Astolfi, M.L.; Canepari, S. Innovative Experimental Approach for Spatial Mapping of Source-Specific Risk Contributions of Potentially Toxic Trace Elements in PM10. *Chemosphere* **2022**, *307*, doi:10.1016/j.chemosphere.2022.135871.
337. Mikula, K.; Skrzypczak, D.; Izydorczyk, G.; Basladyńska, S.; Szustakiewicz, K.; Gorazda, K.; Moustakas, K.; Chojnacka, K.; Witek-Krowiak, A. From Hazardous Waste to Fertilizer: Recovery of High-Value Metals from Smelter Slags. *Chemosphere* **2022**, *297*, doi:10.1016/j.chemosphere.2022.134226.
338. Millán-Martínez, M.; Sánchez-Rodas, D.; Sánchez de la Campa, A.M.; de la Rosa, J. Impact of the SARS-CoV-2 Lockdown Measures in Southern Spain on PM10 Trace Element and Gaseous Pollutant Concentrations. *Chemosphere* **2022**, *303*, doi:10.1016/j.chemosphere.2022.134853.
339. Nguyen, N.B.; Kim, M.-K.; Le, Q.T.; Ngo, D.N.; Zoh, K.-D.; Joo, S.-W. Spectroscopic Analysis of Microplastic Contaminants in an Urban Wastewater Treatment Plant from Seoul, South Korea. *Chemosphere* **2021**, *263*, doi:10.1016/j.chemosphere.2020.127812.
340. Novack, A.M.; Costa, T.C.; Hackbarth, F.V.; Marinho, B.A.; Valle, J.A.B.; Souza, A.A.U.; Vilar, V.J.P.; Souza, S.M.A.G.U. Industrial Steel Waste Recovery Pathway: Production of Innovative Supported Catalyst and Its Application on Hexavalent Chromium Reduction Studies. *Chemosphere* **2022**, *298*, doi:10.1016/j.chemosphere.2022.134216.
341. Orts, F.; Bonastre, J.; Fernandez, J.; Cases, F. Effect of Chloride on the One Step Electrochemical Treatment of an Industrial Textile Wastewater with Tin Dioxide Anodes. The Case of Trichromy Procion HEXL. *Chemosphere* **2020**, *245*, doi:10.1016/j.chemosphere.2019.125396.
342. Othmani, A.; Kesraoui, A.; Elaissoui, I.; Seffen, M. Coupling Anodic Oxidation, Biosorption and Alternating Current as Alternative for Wastewater Purification. *Chemosphere* **2020**, *249*, doi:10.1016/j.chemosphere.2020.126480.
343. Özyonar, F.; Korkmaz, M.U. Sequential Use of the Electrocoagulation-Electrooxidation Processes for Domestic Wastewater Treatment. *Chemosphere* **2022**, *290*, doi:10.1016/j.chemosphere.2021.133172.
344. Pham, M.T.N.; Anh, H.Q.; Nghiem, X.T.; Tu, B.M.; Dao, T.N.; Nguyen, M.H. Characterization of PCDD/Fs and Dioxin-like PCBs in Flue Gas from Thermal Industrial Processes in Vietnam: A Comprehensive Investigation on Emission Profiles and Levels. *Chemosphere* **2019**, *225*, 238–246, doi:10.1016/j.chemosphere.2019.03.024.
345. Potter, P.M.; Al-Abed, S.R.; Hasan, F.; Lomnicki, S.M. Influence of Polymer Additives on Gas-Phase Emissions from 3D Printer Filaments. *Chemosphere* **2021**, *279*, doi:10.1016/j.chemosphere.2021.130543.
346. Radziemska, M.; Gusiatiń, Z.M.; Cydzik-Kwiatkowska, A.; Cerdà, A.; Pecina, V.; Bęś, A.; Datta, R.; Majewski, G.; Mazur, Z.; Dziecioł, J.; et al. Insight into Metal Immobilization and Microbial Community Structure in Soil from a Steel Disposal

- Dump Phytostabilized with Composted, Pyrolyzed or Gasified Wastes. *Chemosphere* **2021**, 272, doi:10.1016/j.chemosphere.2021.129576.
347. Shokri, A.; Sanavi Fard, M. Corrosion in Seawater Desalination Industry: A Critical Analysis of Impacts and Mitigation Strategies. *Chemosphere* **2022**, 307, doi:10.1016/j.chemosphere.2022.135640.
348. Singh, S.; Garg, A. Characterisation and Utilization of Steel Industry Waste Sludge as Heterogeneous Catalyst for the Abatement of Chlorinated Organics by Advanced Oxidation Processes. *Chemosphere* **2020**, 242, doi:10.1016/j.chemosphere.2019.125158.
349. Soares, K.L.; Sunyer-Caldú, A.; Barbosa, S.C.; Primel, E.G.; Fillmann, G.; Diaz Cruz, M.S. Rapid and Cost-Effective Multiresidue Analysis of Pharmaceuticals, Personal Care Products, and Antifouling Booster Biocides in Marine Sediments Using Matrix Solid Phase Dispersion. *Chemosphere* **2021**, 267, doi:10.1016/j.chemosphere.2020.129085.
350. Song, B.; Wang, Z.; Li, J.; Luo, M.; Cao, P.; Zhang, C. Sulfur-Zinc Modified Kaolin/Steel Slag: A Particle Electrode That Efficiently Degrades Norfloxacin in a Neutral/Alkaline Environment. *Chemosphere* **2021**, 284, doi:10.1016/j.chemosphere.2021.131328.
351. Sun, Z.; Li, Y.; Li, M.; Wang, N.; Liu, J.; Guo, H.; Li, B. Steel Pickling Rinse Wastewater Treatment by Two-Stage MABR System: Reactor Performance, Extracellular Polymeric Substances (EPS) and Microbial Community. *Chemosphere* **2022**, 299, doi:10.1016/j.chemosphere.2022.134402.
352. Tian, Y.; Li, J.; Jia, S.; Zhao, W. Co-Release Potential and Human Health Risk of Heavy Metals from Galvanized Steel Pipe Scales under Stagnation Conditions of Drinking Water. *Chemosphere* **2021**, 267, doi:10.1016/j.chemosphere.2020.129270.
353. Tian, Y.; Liu, X.; Huo, R.; Shi, Z.; Sun, Y.; Feng, Y.; Harrison, R.M. Organic Compound Source Profiles of PM<sub>2.5</sub> from Traffic Emissions, Coal Combustion, Industrial Processes and Dust. *Chemosphere* **2021**, 278, doi:10.1016/j.chemosphere.2021.130429.
354. Wang, S.; Liu, J.; Yi, H.; Tang, X.; Yu, Q.; Zhao, S.; Gao, F.; Zhou, Y.; Zhong, T.; Wang, Y. Trends in Air Pollutant Emissions from the Sintering Process of the Iron and Steel Industry in the Fenwei Plain and Surrounding Regions in China, 2014–2017. *Chemosphere* **2022**, 291, doi:10.1016/j.chemosphere.2021.132917.
355. Wang, S.; Wang, Q.; Yuan, Z.; Wu, X. Organochlorine Pesticides in Riparian Soils and Sediments of the Middle Reach of the Huaihe River: A Traditional Agricultural Area in China. *Chemosphere* **2022**, 296, doi:10.1016/j.chemosphere.2022.134020.
356. Wu, L.; Wang, R.; Huang, C.-L.; Wu, C.-C.; Wong, C.S.; Bao, L.-J.; Zeng, E.Y. Impact of Passive Sampler Protection Apparatus on Sediment Porewater Profiles of Hydrophobic Organic Compounds. *Chemosphere* **2020**, 252, doi:10.1016/j.chemosphere.2020.126534.
357. Xu, B.; Yi, Y. Immobilization of Lead (Pb) Using Ladle Furnace Slag and Carbon



- Dioxide. *Chemosphere* **2022**, *308*, doi:10.1016/j.chemosphere.2022.136387.
358. Xu, B.; Yi, Y. Treatment of Ladle Furnace Slag by Carbonation: Carbon Dioxide Sequestration, Heavy Metal Immobilization, and Strength Enhancement. *Chemosphere* **2022**, *287*, doi:10.1016/j.chemosphere.2021.132274.
359. Zamane, S.; Gori, D.; Höhener, P. Multistep Partitioning Causes Significant Stable Carbon and Hydrogen Isotope Effects during Volatilization of Toluene and Propan-2-ol from Unsaturated Sandy Aquifer Sediment. *Chemosphere* **2020**, *251*, doi:10.1016/j.chemosphere.2020.126345.
360. Zhan, M.-X.; Xu, S.; Cai, P.; Chen, T.; Lin, X.; Buekens, A.; Li, X. Parameters Affecting the Formation Mechanisms of Dioxins in the Steel Manufacture Process. *Chemosphere* **2019**, *222*, 250–257, doi:10.1016/j.chemosphere.2019.01.126.
361. Zhang, J.; Su, P.; Li, L. Bioremediation of Stainless Steel Pickling Sludge through Microbially Induced Carbonate Precipitation. *Chemosphere* **2022**, *298*, doi:10.1016/j.chemosphere.2022.134213.
362. Zhang, J.; Wang, L.; Kannan, K. Quantitative Analysis of Polyethylene Terephthalate and Polycarbonate Microplastics in Sediment Collected from South Korea, Japan and the USA. *Chemosphere* **2021**, *279*, doi:10.1016/j.chemosphere.2021.130551.
363. Zhang, X.; Lin, T.; Jiang, F.; Zhang, X.; Wang, S.; Zhang, S. Impact of Pipe Material and Chlorination on the Biofilm Structure and Microbial Communities. *Chemosphere* **2022**, *289*, doi:10.1016/j.chemosphere.2021.133218.
364. Zhou, T.; Bo, X.; Qu, J.; Wang, L.; Zhou, J.; Li, S. Characteristics of PCDD/Fs and Metals in Surface Soil around an Iron and Steel Plant in North China Plain. *Chemosphere* **2019**, *216*, 413–418, doi:10.1016/j.chemosphere.2018.10.024.
365. Lv, Y.; Yang, X.; Du, W.; Ma, P.; Wang, H.; Bonnefont, A.; Wright, D.S.; Ruhlmann, L.; Zhang, C. An Efficient Electrochromic Supercapacitor Based on Solution-Processable Nanoporous Poly{tris[4-(3,4-Ethylenedioxythiophene)Phenyl]Amine}. *ChemSusChem* **2020**, *13*, 3844–3854, doi:10.1002/cssc.202000941.
366. Wang, H.; Li, M.; Garg, S.; Wu, Y.; Nazmi Idros, M.; Hocking, R.; Duan, H.; Gao, S.; Yago, A.J.; Zhuang, L.; et al. Cobalt Electrochemical Recovery from Lithium Cobalt Oxides in Deep Eutectic Choline Chloride+Urea Solvents. *ChemSusChem* **2021**, *14*, 2972–2983, doi:10.1002/cssc.202100954.
367. Guo, S.-H.; Gao, P.; Wu, B.; Zhang, L.-Y. Fluorine Emission List of China's Key Industries and Soil Fluorine Concentration Estimation. *Chinese Journal of Applied Ecology* **2019**, *30*, 1–9, doi:10.13287/j.1001-9332.201901.002.
368. Basaleh, A.A.; Al-Malack, M.H.; Saleh, T.A. Polyamide-Baghouse Dust Nanocomposite for Removal of Methylene Blue and Metals: Characterization, Kinetic, Thermodynamic and Regeneration. *Chinese Journal of Chemical Engineering* **2021**, *39*, 112–125, doi:10.1016/j.cjche.2020.08.050.
369. Gao, J.; Li, C.; Liu, W.; Hu, J.; Wang, L.; Liu, Q.; Liang, B.; Yue, H.; Zhang, G.; Luo, D.; et al. Process Simulation and Energy Integration in the Mineral Carbonation of

- Blast Furnace Slag. *Chinese Journal of Chemical Engineering* **2019**, *27*, 157–167, doi:10.1016/j.cjche.2018.04.012.
370. Lu, K.; Lü, Y.; Bai, Y.; Zhang, J.; Bie, N.; Ren, Y.; Ma, Y. Experimental Investigation and Theoretical Modeling on Scale Behaviors of High Salinity Wastewater in Zero Liquid Discharge Process of Coal Chemical Industry. *Chinese Journal of Chemical Engineering* **2020**, *28*, 969–979, doi:10.1016/j.cjche.2020.01.001.
371. Chen, M.; Yan, J.; Hu, J.; Yu, D.; Wu, L.; Jia, B. Advanced Treatment of Refinery Wastewater by Catalytic Ozonation with Steel Slag Sludge Ceramsite Catalyst. *Chinese Journal of Environmental Engineering* **2019**, *13*, 1299–1304, doi:10.12030/j.cjee.201812152.
372. Guo, S.; Huang, Y.; Wang, Y.; Lu, K.; Guo, J.; Fan, J.; Wen, F. Pollution Characteristics of the Generated Particles during Finishing Rolling Process and Concentration Monitoring in the Occupied Zone. *Chinese Journal of Environmental Engineering* **2021**, *15*, 307–315, doi:10.12030/j.cjee.202002046.
373. He, J.; Geng, L.; Pan, R.; Wang, S.; Li, X. Removal Effect and Process Conditions of Composite Absorbent Na<sub>2</sub>CO<sub>3</sub>+EDTA+EDTA-2Na for Wet Desulfurization of Blast Furnace Gas by Electrochemical Synergistic Method. *Chinese Journal of Environmental Engineering* **2022**, *16*, 2613–2620, doi:10.12030/j.cjee.202201039.
374. Xu, D.; Li, Z.; Sheng, G.; Tian, Y.; Huang, T. Performance and Membrane Fouling Properties of Anaerobic Biofilm Membrane Bioreactor for Low-Concentration Wastewater Treatment. *Chinese Journal of Environmental Engineering* **2019**, *13*, 2878–2883, doi:10.12030/j.cjee.201901105.
375. Gul, A.; Alam, B.; Iqbal, M.J.; Ahmed, W.; Shahzada, K.; Javed, M.H.; Khan, E.A. Impact of Length and Percent Dosage of Recycled Steel Fibers on the Mechanical Properties of Concrete. *Civil Engineering Journal (Iran)* **2021**, *7*, 1650–1666, doi:10.28991/cej-2021-03091750.
376. Milad, A.; Ali, A.S.B.; Yusoff, N.I.M. A Review of the Utilisation of Recycled Waste Material as an Alternative Modifier in Asphalt Mixtures. *Civil Engineering Journal (Iran)* **2020**, *6*, 42–60, doi:10.28991/cej-2020-SP(EMCE)-05.
377. Panchenko, Y.M.; Marshakov, A.I.; Nikolaeva, L.A.; Igonin, T.N. Estimating the First-Year Corrosion Losses of Structural Metals for Continental Regions of the World. *Civil Engineering Journal (Iran)* **2020**, *6*, 1503–1519, doi:10.28991/cej-2020-03091563.
378. Yagoub, M.; Mellas, M.; Benchabane, A.; Zatar, A. Experimental Characterization of a Functionally Graded Composite Using Recycled Steel Fiber. *Civil Engineering Journal (Iran)* **2022**, *8*, 879–894, doi:10.28991/CEJ-2022-08-05-03.
379. Han, J.; Wang, J.; Yu, D.; Wang, S.; Yu, X.; Wu, J.; Xu, M. Corrosion Behavior of Ash from Co-Combustion of Torrefied Biomass and Coal. *Clean Coal Technology* **2022**, *28*, 41–48, doi:10.13226/j.issn.1006-6772.CC22013002.
380. Wang, B.; Li, L.; Xian, Y.; Yu, P.; Hao, W. Fundamental Coal Demand Prediction under the Goal of Carbon Neutrality in 2060. *Clean Coal Technology* **2022**, *28*, 1–13, doi:10.13226/j.issn.1006-6772.CN22022101.

381. Wang, B.; Lin, Y.; Li, Y.; Wang, J.; Zhu, T. Influencing Factors of Catalytic Hydrolysis of Carbonyl Sulfide in Blast Furnace Gas. *Clean Coal Technology* **2021**, *27*, 233–238, doi:10.13226/j.issn.1006-6772.21012509.
382. Zhou, H.; Gao, Z.; Long, H.; Xu, H.; Wang, G.; Gao, L. Governance Technology and Development Trend of NO<sub>x</sub> in Sintering. *Clean Coal Technology* **2021**, *27*, 77–88, doi:10.13226/j.issn.1006-6772.21021901.
383. Zhu, L.; Zhang, Y.; Tian, Y.; Xu, F. Effects of Power Supply Parameters and Gas Composition on Transformation of Coal Bed Methane by Low-Temperature Plasma. *Clean Coal Technology* **2022**, *28*, 81–86, doi:10.13226/j.issn.1006-6772.CH22022301.
384. Hanak, D. Environmental Life-Cycle Assessment of Waste-Coal Pellets Production. *Clean Energy* **2022**, *6*, 765–778, doi:10.1093/ce/zkab050.
385. Stavridou, N.; Koltsakis, E.; Baniotopoulos, C.C. A Comparative Life-Cycle Analysis of Tall Onshore Steel Wind-Turbine Towers. *Clean Energy* **2020**, *4*, 48–57, doi:10.1093/ce/zkz028.
386. Pfennig, A.; Kranzmann, A. Understanding the Anomalous Corrosion Behaviour of 17% Chromium Martensitic Stainless Steel in Laboratory CCS-Environment—A Descriptive Approach. *Clean Technologies* **2022**, *4*, 239–257, doi:10.3390/cleantechnol4020014.
387. Arana-Landin, G.; Landeta-Manzano, B.; Pena-Lang, M.; Uriarte-Gallastegi, N. Trend in Environmental Impact of the Energy Produced and Distributed by Wind Power Systems. *Clean Technologies and Environmental Policy* **2020**, *22*, 1041–1054, doi:10.1007/s10098-020-01863-6.
388. Caetano, J.A.; Schalch, V.; Pablos, J.M. Characterization and Recycling of the Fine Fraction of Automotive Shredder Residue (ASR) for Concrete Paving Blocks Production. *Clean Technologies and Environmental Policy* **2020**, *22*, 835–847, doi:10.1007/s10098-020-01825-y.
389. Cakir, N.; Alp, E.; Yetis, U. Assessing Technologies for Reducing Dust Emissions from Sintermaking Based on Cross-Media Effects and Economic Analysis. *Clean Technologies and Environmental Policy* **2020**, *22*, 1909–1928, doi:10.1007/s10098-020-01933-9.
390. Cunha, C.B.; Brondani, M.; Mayer, F.D.; Lopes, P.P.; R.Hoffmann Low-Cost Small-Scale Distillation Column: Assessment of Polymeric Materials on Its Economic, Chemical, Mechanical, and Environmental Performance. *Clean Technologies and Environmental Policy* **2020**, *22*, 1547–1563, doi:10.1007/s10098-020-01897-w.
391. Ghazinoory, S.; Fatemi, M.; Adab, A. Iranian Steel Value Chain: Advantageous but Unsustainable. *Clean Technologies and Environmental Policy* **2022**, *24*, 2099–2115, doi:10.1007/s10098-022-02300-6.
392. Mohajerani, A.; Suter, D.; Jeffrey-Bailey, T.; Song, T.; Arulrajah, A.; Horpibulsuk, S.; Law, D. Recycling Waste Materials in Geopolymer Concrete. *Clean Technologies and Environmental Policy* **2019**, *21*, 493–515, doi:10.1007/s10098-018-01660-2.
393. Mohamad, A.Y.; Jamil, M.; Md Yusoff, N.I.; Mohd Fadzil, S.; Taha, M.R. Physical,

- Microstructure and Leaching Assessments for Pavement Road Base Containing Mixed Steel Slag and Cathode Ray Tube Glass. *Clean Technologies and Environmental Policy* **2022**, *24*, 919–930, doi:10.1007/s10098-021-02231-8.
394. Mohsenzadeh, F.M.; Payab, H.; Abedi, Z.; Abdoli, M.A. Reduction of CO<sub>2</sub> Emissions and Energy Consumption by Improving Equipment in Direct Reduction Ironmaking Plant. *Clean Technologies and Environmental Policy* **2019**, *21*, 847–860, doi:10.1007/s10098-019-01672-6.
395. Romo-Orozco, J.M.; Contreras-Jiménez, J.C.; Corona-Armenta, J.R.; Morales-Mendoza, L.F. A Methodological Approach to Evaluate Structural Building Projects through the Environmental Economic Index. *Clean Technologies and Environmental Policy* **2022**, *24*, 901–918, doi:10.1007/s10098-021-02230-9.
396. Saha, B.K.; Chakraborty, B.; Dutta, R. Estimation of Waste Heat and Its Recovery Potential from Energy-Intensive Industries. *Clean Technologies and Environmental Policy* **2020**, *22*, 1795–1814, doi:10.1007/s10098-020-01919-7.
397. Sudarsan, J.S.; Vaishampayan, S.; Parija, P. Making a Case for Sustainable Building Materials to Promote Carbon Neutrality in Indian Scenario. *Clean Technologies and Environmental Policy* **2022**, *24*, 1609–1617, doi:10.1007/s10098-021-02251-4.
398. Tang, Y.; Shi, Y.; Li, Y.; Yuan, X.; Mu, R.; Wang, Q.; Ma, Q.; Hong, J.; Cao, S.; Zuo, J.; et al. Environmental and Economic Impact Assessment of the Alumina–Carbon Refractory Production in China. *Clean Technologies and Environmental Policy* **2019**, *21*, 1723–1737, doi:10.1007/s10098-019-01741-w.
399. Wang, X.; Li, J.; Wang, L.; Jia, X.; Hong, M.; Ren, Y.; Ma, M. A Novel De-Rusting Method with Molten Salt Precleaning and Laser Cleaning for the Recycling of Steel Parts. *Clean Technologies and Environmental Policy* **2021**, *23*, 1403–1414, doi:10.1007/s10098-020-02023-6.
400. Wu, L.; Wang, M.; Cheng, J.; Li, X. Embodied Carbon Emission of Building Materials in Southwest China: Analysis Based on Tapio Decoupling and Logarithmic Mean Divisia Index Decomposition. *Clean Technologies and Environmental Policy* **2022**, doi:10.1007/s10098-022-02414-x.
401. Altouni, A.; Gorjian, S.; Banakar, A. Development and Performance Evaluation of a Photovoltaic-Powered Induction Cooker (PV-IC): An Approach for Promoting Clean Production in Rural Areas. *Cleaner Engineering and Technology* **2022**, *6*, doi:10.1016/j.clet.2021.100373.
402. Arguillarena, A.; Margallo, M.; Urtiaga, A. Carbon Footprint of the Hot-Dip Galvanisation Process Using a Life Cycle Assessment Approach. *Cleaner Engineering and Technology* **2021**, *2*, doi:10.1016/j.clet.2021.100041.
403. Dock, J.; Janz, D.; Weiss, J.; Marschnig, A.; Kienberger, T. Time- and Component-Resolved Energy System Model of an Electric Steel Mill. *Cleaner Engineering and Technology* **2021**, *4*, doi:10.1016/j.clet.2021.100223.
404. Dock, J.; Kienberger, T. Techno-Economic Case Study on Oxyfuel Technology Implementation in EAF Steel Mills – Concepts for Waste Heat Recovery and Carbon Dioxide Utilization. *Cleaner Engineering and Technology* **2022**, *9*,

- doi:10.1016/j.clet.2022.100525.
405. Fernandes, M.E.P.; de Melo, A.C.A.; de Oliveira, A.J.; Chesman, C. Hard Turning of AISI D6 Tool Steel under Dry, Wet and Cryogenic Conditions: An Economic Investigation Aimed at Achieving a Sustainable Machining Approach. *Cleaner Engineering and Technology* **2020**, *1*, doi:10.1016/j.clet.2020.100022.
406. Loder, A.; Siebenhofer, M.; Böhm, A.; Lux, S. Clean Iron Production through Direct Reduction of Mineral Iron Carbonate with Low-Grade Hydrogen Sources; the Effect of Reduction Feed Gas Composition on Product and Exit Gas Composition. *Cleaner Engineering and Technology* **2021**, *5*, doi:10.1016/j.clet.2021.100345.
407. Menna Barreto, M.F.F.; Timm, J.F.G.; Passuello, A.; Dal Molin, D.C.C.; Masuero, J.R. Life Cycle Costs and Impacts of Massive Slabs with Varying Concrete Cover. *Cleaner Engineering and Technology* **2021**, *5*, doi:10.1016/j.clet.2021.100256.
408. Müller, N.; Herz, G.; Reichelt, E.; Jahn, M.; Michaelis, A. Assessment of Fossil-Free Steelmaking Based on Direct Reduction Applying High-Temperature Electrolysis. *Cleaner Engineering and Technology* **2021**, *4*, doi:10.1016/j.clet.2021.100158.
409. Rahnama Mobarakeh, M.; Kienberger, T. Climate Neutrality Strategies for Energy-Intensive Industries: An Austrian Case Study. *Cleaner Engineering and Technology* **2022**, *10*, doi:10.1016/j.clet.2022.100545.
410. Shufian, A.; Mahin, M.S.R.; Islam, R. Electronics and Waste Material Recycler Energy-Efficient Electric Furnace System. *Cleaner Engineering and Technology* **2022**, *6*, doi:10.1016/j.clet.2022.100407.
411. Rupp, M.; Buck, M.; Klink, R.; Merkel, M.; Harrison, D.K. Additive Manufacturing of Steel for Digital Spare Parts – A Perspective on Carbon Emissions for Decentral Production. *Cleaner Environmental Systems* **2022**, *4*, doi:10.1016/j.cesys.2021.100069.
412. Assaad, J.J.; Mikhael, C.; Hanna, R. Recycling of Waste Expanded Polystyrene Concrete in Lightweight Sandwich Panels and Structural Applications. *Cleaner Materials* **2022**, *4*, doi:10.1016/j.clema.2022.100095.
413. Duscha, V.; Peterson, E.B.; Schleich, J.; Schumacher, K. SECTORAL TARGETS to ADDRESS COMPETITIVENESS - A CGE ANALYSIS with FOCUS on the GLOBAL STEEL SECTOR. *Climate Change Economics* **2019**, *10*, doi:10.1142/S2010007819500015.
414. Li, B.-S.; Chen, Y.; Zhang, S.; Wu, Z.; Cofala, J.; Dai, H. CLIMATE and HEALTH BENEFITS of PHASING out IRON & STEEL PRODUCTION CAPACITY in CHINA: FINDINGS from the IMED MODEL. *Climate Change Economics* **2020**, *11*, doi:10.1142/S2010007820410080.
415. Winchester, N.; Reilly, J.M. THE ECONOMIC, ENERGY, and EMISSIONS IMPACTS of CLIMATE POLICY in South Korea. *Climate Change Economics* **2019**, *10*, doi:10.1142/S2010007819500106.
416. Gao, Y.-B.; Xing, Y.-K.; He, F.; Kuai, P.; Mao, X.-Q. Research on Co-Control Effectiveness Evaluation of Energy Saving and Emission Reduction Measures in China's Iron and Steel Industry. *Climate Change Research* **2021**, *17*, 388–399,

- doi:10.12006/j.issn.1673-1719.2020.287.
417. Tan, Q.-L.; Liu, L.-T.; Zhu, S.-L. Study on the Benchmark Method for National Carbon Trading in China's Iron and Steel Industry an. *Climate Change Research* **2021**, *17*, 590–597, doi:10.12006/j.issn.1673-1719.2020.248.
  418. Chiappinelli, O.; Gerres, T.; Neuhoﬀ, K.; Lettow, F.; de Coninck, H.; Felsmann, B.; Joltreau, E.; Khandekar, G.; Linares, P.; Richstein, J.; et al. A Green COVID-19 Recovery of the EU Basic Materials Sector: Identifying Potentials, Barriers and Policy Solutions. *Climate Policy* **2021**, *21*, 1328–1346, doi:10.1080/14693062.2021.1922340.
  419. Nilsson, L.J.; Bauer, F.; Åhman, M.; Andersson, F.N.G.; Bataille, C.; de la Rue du Can, S.; Ericsson, K.; Hansen, T.; Johansson, B.; Lechtenböhmer, S.; et al. An Industrial Policy Framework for Transforming Energy and Emissions Intensive Industries towards Zero Emissions. *Climate Policy* **2021**, *21*, 1053–1065, doi:10.1080/14693062.2021.1957665.
  420. Tan-Soo, J.-S.; Li, L.; Qin, P.; Zhang, X.-B. Do CO<sub>2</sub> Emissions Trading Schemes Deliver Co-Benefits? Evidence from Shanghai. *Climate Policy* **2022**, *22*, 64–76, doi:10.1080/14693062.2021.2009432.
  421. Trollip, H.; McCall, B.; Bataille, C. How Green Primary Iron Production in South Africa Could Help Global Decarbonization. *Climate Policy* **2022**, *22*, 236–247, doi:10.1080/14693062.2021.2024123.
  422. Vogl, V.; Åhman, M.; Nilsson, L.J. The Making of Green Steel in the EU: A Policy Evaluation for the Early Commercialization Phase. *Climate Policy* **2021**, *21*, 78–92, doi:10.1080/14693062.2020.1803040.
  423. Liu, L.-J.; Liang, Q.-M.; Creutzig, F.; Cheng, N.; Liu, L.-C. Electricity End-Use and Construction Activity Are Key Leverage Points for Co-Controlling Greenhouse Gases and Local Pollution in China. *Climatic Change* **2021**, *167*, doi:10.1007/s10584-021-03167-0.
  424. Vögele, S.; Rübbelke, D.; Govorukha, K.; Grajewski, M. Socio-Technical Scenarios for Energy-Intensive Industries: The Future of Steel Production in Germany. *Climatic Change* **2020**, *162*, 1763–1778, doi:10.1007/s10584-019-02366-0.
  425. Chakraborty, B.; Tirkey, S.; Mishra, S.; Jha, P.K.; Pankaj, P.K.; Kumar, A.; Ghosh, B.; Sahoo, B.K. Implementation of an Integrated System for Coke Oven Battery Health Monitoring at Rourkela Steel Plant. *Coke and Chemistry* **2021**, *64*, 218–225, doi:10.3103/S1068364X21050021.
  426. Jha, P.K.; Das, T.K.; Soni, A.B. A Study to Predict CSR of Coke, Produced from Weathered Coal. *Coke and Chemistry* **2019**, *62*, 450–456, doi:10.3103/S1068364X19100065.
  427. Rudyka, V.I.; Soloviov, M.A.; Malyna, V.P. Innovations in Coke Production, Market Trends: Insights from the Eurocoke 2019 Summit. *Coke and Chemistry* **2019**, *62*, 267–279, doi:10.3103/S1068364X1907010X.
  428. Li, Y.-H.; Pangestu, S.; Purwanto, A.; Chen, C.-T. Synergetic Combustion Behavior of Aluminum and Coal Addition in Hybrid Iron-Methane-Air Premixed Flames.

- Combustion and Flame* **2021**, *228*, 364–374, doi:10.1016/j.combustflame.2021.02.013.
429. Linde, A.V.; Studenikin, I.A.; Kondakov, A.A.; Grachev, V.V. Thermally Coupled SHS Processes in Layered (Fe<sub>2</sub>O<sub>3</sub> + 2Al)/(Ti + Al)/(Fe<sub>2</sub>O<sub>3</sub> + 2Al) Structures: An Experimental Study. *Combustion and Flame* **2019**, *208*, 364–368, doi:10.1016/j.combustflame.2019.07.010.
430. Mi, X.; Fujinawa, A.; Bergthorson, J. A Quantitative Analysis of the Ignition Characteristics of Fine Iron Particles. *Combustion and Flame* **2022**, *240*, doi:10.1016/j.combustflame.2022.112011.
431. Schiro, F.; Stoppato, A. Experimental Investigation of Emissions and Flame Stability for Steel and Metal Fiber Cylindrical Premixed Burners. *Combustion Science and Technology* **2019**, *191*, 453–471, doi:10.1080/00102202.2018.1500556.
432. Soares, M.P.; De Angelis, C.F.; Cardoso, I.L.; McKenzie, D.J.; da Costa Souza, I.; Wunderlin, D.A.; Monferrán, M.V.; Fernandes, M.N.; Leite, C.A.C. Settleable Atmospheric Particulate Matter Induces Stress and Affects the Oxygen-Carrying Capacity and Innate Immunity in Nile Tilapia (*Oreochromis Niloticus*). *Comparative Biochemistry and Physiology Part - C: Toxicology and Pharmacology* **2022**, *257*, doi:10.1016/j.cbpc.2022.109330.
433. Isensee, C.; Teuteberg, F.; Griese, K.-M. How Can Corporate Culture Contribute to Emission Reduction in the Construction Sector? An SME Case Study on Beliefs, Actions, and Outcomes. *Corporate Social Responsibility and Environmental Management* **2022**, doi:10.1002/csr.2368.
434. Das, S.; Galgo, S.J.; Alam, M.A.; Lee, J.G.; Hwang, H.Y.; Lee, C.H.; Kim, P.J. Recycling of Ferrous Slag in Agriculture: Potentials and Challenges. *Critical Reviews in Environmental Science and Technology* **2020**, *52*, 1247–1281, doi:10.1080/10643389.2020.1853458.
435. Rezvani, H.; Khodadadi, H. Designing Evolutionary Wavelet Neural Network for Estimating Foaming Slag Quality in Electric Arc Furnace Using Power Quality Indices. *CSEE Journal of Power and Energy Systems* **2022**, *8*, 1165–1174, doi:10.17775/CSEEJPES.2020.02450.
436. Rath, B.; Deo, S.; Ramtekkar, G. An Experimental Study on Strength and Durability of Glass Fiber Reinforced Cement Concrete with Partial Replacement of Cement and Sand with Coal Ashes Available in Central Chhattisgarh Region. *Current Applied Science and Technology* **2022**, *22*, doi:10.55003/cast.2022.01.22.010.
437. De Ras, K.; Van de Vijver, R.; Galvita, V.V.; Marin, G.B.; Van Geem, K.M. Carbon Capture and Utilization in the Steel Industry: Challenges and Opportunities for Chemical Engineering. *Current Opinion in Chemical Engineering* **2019**, *26*, 81–87, doi:10.1016/j.coche.2019.09.001.
438. Grainger, A.; Smith, G. The Role of Low Carbon and High Carbon Materials in Carbon Neutrality Science and Carbon Economics. *Current Opinion in Environmental Sustainability* **2021**, *49*, 164–189, doi:10.1016/j.cosust.2021.06.006.
439. Biswal, S.; Pahlevani, F.; Sahajwalla, V. Wastes as Resources in Steelmaking Industry — Current Trends. *Current Opinion in Green and Sustainable Chemistry*

- 2020, 26, doi:10.1016/j.cogsc.2020.100377.
440. Jaimes, W.; Maroufi, S. Sustainability in Steelmaking. *Current Opinion in Green and Sustainable Chemistry* **2020**, *24*, 42–47, doi:10.1016/j.cogsc.2020.01.002.
441. Shahabuddin, M.; Mofijur, M.; Rizwanul Fattah, I.M.; Kalam, M.A.; Masjuki, H.H.; Chowdhury, M.A.; Hossain, N. Study on the Tribological Characteristics of Plant Oil-Based Bio-Lubricant with Automotive Liner-Piston Ring Materials. *Current Research in Green and Sustainable Chemistry* **2022**, *5*, doi:10.1016/j.crgsc.2022.100262.
442. Tanzer, S.E.; Blok, K.; Ramírez, A. Decarbonising Industry via BECCS: Promising Sectors, Challenges, and Techno-Economic Limits of Negative Emissions. *Current Sustainable/Renewable Energy Reports* **2021**, *8*, 253–262, doi:10.1007/s40518-021-00195-3.
443. Wei, M.; McMillan, C.A.; de la Rue du Can, S. Electrification of Industry: Potential, Challenges and Outlook. *Current Sustainable/Renewable Energy Reports* **2019**, *6*, 140–148, doi:10.1007/s40518-019-00136-1.
444. Chu, H.; Ma, J.; Liu, X.; Wang, F.; Zhou, X.; Zhang, Y.; Li, E.; Zhang, X. Spatial Evolution of Membrane Fouling along a Multi-Stage Integrated Membrane System: A Pilot Study for Steel Industry Brine Recycling. *Desalination* **2022**, *527*, doi:10.1016/j.desal.2022.115566.
445. Mamede, N.; Park, H.; Choo, K.-H. Hybrid Electrochemical Microfiltration Treatment of Reverse Osmosis Concentrate: A Mechanistic Study on the Effects of Electrode Materials. *Desalination* **2020**, *493*, doi:10.1016/j.desal.2020.114617.
446. El-Wakeel, S.T. Efficient Removal of Pb(II), Hg(II) and As(III) Ions by a Recyclable Low Cost Magnetic Hydroxyapatite Nanocomposite from Aqueous Solution. *Desalination and Water Treatment* **2021**, *236*, 155–163, doi:10.5004/dwt.2021.27696.
447. Elhebshi, A.; Nemr, A.E.; El-Deab, M.S.; Ashour, I. Cbg-Hcl as a Green Corrosion Inhibitor for Low Carbon Steel in 0.5 m H<sub>2</sub> SOWITH and without 0.1 m NaCl. *Desalination and Water Treatment* **2019**, *164*, 240–248, doi:10.5004/dwt.2019.24446.
448. Ettaloui, Z.; Salah, S.; Aguelmous, A.; Jada, A.; Taleb, A. Use of Ferric Chloride Contained in the Rejects from the Steel Industry as a Coagulant for the Fuel Washing Wastewater Treatment. *Desalination and Water Treatment* **2021**, *234*, 68–76, doi:10.5004/dwt.2021.27556.
449. Goodboy, K.P.; Missimer, T.M. Evaluation of Desalinated Seawater vs. Filtered Raw Seawater for Heap Leach Copper Extraction on Mountaintop Mines in Arid Regions. *Desalination and Water Treatment* **2020**, *194*, 1–18, doi:10.5004/dwt.2020.26035.
450. Hassan, A.A.; Mohamed, A.A.; Barakat, A.-M.; Darwish, A.S. New Insights on the Expediency of Egyptian Organoclays to Suppress Corrosiveness of Acidic-Produced Water in Abu-Rudeis Oilfield, South Sinai, by Removal of Scale-Forming Cations and Sulfate-Reducing Bacteria: Is There a Direct Link to Clay Lamellar Ordering? *Desalination and Water Treatment* **2020**, *207*, 60–85, doi:10.5004/dwt.2020.26402.
451. Kastali, M.; Mouhir, L.; Assou, M.; Anouzla, A.; Abrouki, Y. Diagnosis of Leachate



- from a Closed Landfill, Impact on the Soil, and Treatment by Coagulation Flocculation with Alginate and Ferric Chloride. *Desalination and Water Treatment* **2020**, *206*, 307–314, doi:10.5004/dwt.2020.26303.
452. Yang, C.; Yang, J.; Song, G.; Zang, L.; Liu, Q.; Qiu, J.; Yang, X.; Wang, C. Facile Fabrication of Multifunctional Superoleophobic and Antifouling Metal Mesh by Dip-Coating Polyanion for Efficient Oil/Water Mixtures as Well as Emulsions Separation. *Desalination and Water Treatment* **2020**, *189*, 165–178, doi:10.5004/dwt.2020.25565.
  453. Geller, M.T.B.; Bailão, J.L.; Tostes, M.E.D.L.; Meneses, A.A.D.M. Indirect GHG Emissions in Hydropower Plants: A Review Focused on the Uncertainty Factors in LCA Studies. *Desenvolvimento e Meio Ambiente* **2020**, *54*, 500–517, doi:10.5380/DMA.V54I0.68640.
  454. Benassi, L.; Alias, C.; Ferretti, D.; Gelatti, U.; Piovani, G.; Zerbini, I.; Sorlini, S. Ecotoxicity and Genotoxicity of Steel Slags: Preliminary Results. *Detritus* **2019**, *6*, 32–38, doi:10.31025/2611-4135/2019.13815.
  455. Gallo, M.; Moreschi, L.; Del Borghi, A. A CRITICAL ENVIRONMENTAL ANALYSIS OF STRATEGIC MATERIALS TOWARDS ENERGY TRANSITION. *Detritus* **2022**, *20*, 3–12, doi:10.31025/2611-4135/2022.15223.
  456. Lucas, H.I.; López, C.G.; Parrodi, J.C.H.; Vollprecht, D.; Raulf, K.; Pomberger, R.; Pretz, T.; Friedrich, B. Quality Assessment of Nonferrous Metals Recovered by Means of Landfill Mining: A Case Study in Belgium. *Detritus* **2019**, *8*, 79–90, doi:10.31025/2611-4135/2019.13879.
  457. Nghiem, H.T.; Phan, Q.M.; Kawamoto, K.; Ngo, K.T.; Nguyen, H.G.; Nguyen, T.D.; Isobe, Y.; Kawasaki, M. An Investigation of the Generation and Management of Construction and Demolition Waste in Vietnam. *Detritus* **2020**, *12*, 135–149, doi:10.31025/2611-4135/2020.14002.
  458. van Praagh, M.; Liebmann, B. MICROPLASTICS IN LANDFILL LEACHATES IN THREE NORDIC COUNTRIES. *Detritus* **2021**, *17*, 58–70, doi:10.31025/2611-4135/2021.15149.
  459. Wu, X.; Yu, J.; Peng, L.; Wang, Q.; Yan, Y. Non-Intrusive Perception and Identification of Industrial Power Load Based on Analysis of Event on User Edge. *Dianli Xitong Zidonghua/Automation of Electric Power Systems* **2021**, *45*, 29–37, doi:10.7500/AEPS20200323013.
  460. Zhang, P.; Xu, J.; Ke, D.; Sun, Y.; Liao, S. Optimal Configuration of Energy System in Iron and Steel Park Driven by Hydrogen Energy. *Dianli Xitong Zidonghua/Automation of Electric Power Systems* **2022**, *46*, 1–10, doi:10.7500/AEPS20211203008.
  461. Zhang, P.; Xu, J.; Sun, Y.; Ke, D.; Liao, S. Low-Carbon Development Mode for Energy System of Iron and Steel Park Driven by Hydrogen Energy. *Dianli Xitong Zidonghua/Automation of Electric Power Systems* **2022**, *46*, 10–20, doi:10.7500/AEPS2021120001.
  462. Sharma, J.B.; Patil, Y.D. Disaster Mitigation of RCC Buildings Using Sacrificial

- Surface Anode Cathodic Protection. *Disaster Advances* **2019**, *12*, 30–40.
463. Haghighat, M.; Allameh, A.; Fereidan, M.; Khavanin, A.; Ghasemi, Z. Effects of Concomitant Exposure to Styrene and Intense Noise on Rats' Whole Lung Tissues. Biochemical and Histopathological Studies. *Drug and Chemical Toxicology* **2022**, *45*, 120–126, doi:10.1080/01480545.2019.1662033.
464. Linhares, C.C.; Santo, J.E.; Teixeira, R.R.; Coutinho, C.P.; Tavares, S.M.O.; Pinto, M.; Costa, J.S.; Mendes, H.; Monteiro, C.S.; Rodrigues, A.V.; et al. Magnetostriction Assessment with Strain Gauges and Fiber Bragg Gratings. *EAI Endorsed Transactions on Energy Web* **2020**, *7*, doi:10.4108/eai.13-7-2018.161420.
465. Matthew, O.J.; Igbayo, A.N.; Olise, F.S.; Owoade, K.O.; Abiye, O.E.; Ayoola, M.A.; Hopke, P.K. Simulation of Point Source Pollutant Dispersion Pattern: An Investigation of Effects of Prevailing Local Weather Conditions. *Earth Systems and Environment* **2019**, *3*, 215–230, doi:10.1007/s41748-019-00087-z.
466. Adhitya, M.; Siregar, R.; Sumarsono, D.A.; Nazaruddin; Heryana, G.; Prasetyo, S.; Zainuri, F. Experimental Analysis in the Test Rig to Detect Temperature at the Surface Disc Brake Rotor Using Rubbing Thermocouple. *Eastern-European Journal of Enterprise Technologies* **2020**, *2*, 6–11, doi:10.15587/1729-4061.2020.191949.
467. Belodedenko, S.; Hrechanyi, O.; Hanush, V.; Vlasov, A. ESTIMATING THE RESIDUAL RESOURCE OF BASIC STRUCTURES USING A MODEL OF FATIGUE DURABILITY UNDER COMPLEX LOADING. *Eastern-European Journal of Enterprise Technologies* **2022**, *3*, 33–41, doi:10.15587/1729-4061.2022.257013.
468. Borysov, V.; Solomko, T.; Yamshinskij, M.; Lukianenko, I.; Tsymbal, B.; Andreev, A.; Bratishko, V.; Bilko, T.; Rebenko, V.; Chorna, T. IDENTIFICATION OF THE FEATURES OF STRUCTURAL-PHASE TRANSFORMATIONS IN THE PROCESSING OF WASTE FROM THE PRODUCTION OF HIGH-ALLOY STEELS. *Eastern-European Journal of Enterprise Technologies* **2021**, *4*, 33–38, doi:10.15587/1729-4061.2021.238763.
469. Dubodelov, V.; Semenko, A.; Bogdan, K.; Goryuk, M. Development of Principles to Control the Processes of Continuous Casting of Alloys Using Magnetodynamic Equipment. *Eastern-European Journal of Enterprise Technologies* **2019**, *4*, 69–75, doi:10.15587/1729-4061.2019.172051.
470. Fomin, O.; Lovska, A.; Masliyev, V.; Tsymbaliuk, A.; Burlutski, O. Determining Strength Indicators for the Bearing Structure of a Covered Wagon's Body Made from Round Pipes When Transported by a Railroad Ferry. *Eastern-European Journal of Enterprise Technologies* **2019**, *1*, 33–40, doi:10.15587/1729-4061.2019.154282.
471. Kerimov, R.I.O. Improving Steel Melting Intensity in the Process of Electrosmelting from Waste and Pellets (HBI). *Eastern-European Journal of Enterprise Technologies* **2019**, *3*, 35–42, doi:10.15587/1729-4061.2019.168352.
472. Kovalenko, V.; Kotok, V. INVESTIGATION OF THE ANODIC BEHAVIOR OF W-BASED SUPERALLOY FOR ELECTROCHEMICAL SELECTIVE TREATMENT. *Eastern-European Journal of Enterprise Technologies* **2020**, *6*, 55–60, doi:10.15587/1729-

- 4061.2020.218355.
473. Nekora, V.; Sidnei, S.; Shnal, T.; Nekora, O.; Dankevych, I.; Pozdieiev, S. DETERMINATION OF FEATURES OF COMPOSITE STEEL AND CONCRETE SLAB BEHAVIOR UNDER FIRE CONDITION. *Eastern-European Journal of Enterprise Technologies* **2021**, *6*, 59–67, doi:10.15587/1729-4061.2021.246805.
474. Petryshchev, A.; Braginec, N.; Borysov, V.; Bratishko, V.; Torubara, O.; Tsymbal, B.; Borysova, S.; Lupinovich, S.; Poliakov, A.; Kuzmenko, V. Study into the Structural-Phase Transformations Accompanying the Resource-Saving Technology of Metallurgical Waste Processing. *Eastern-European Journal of Enterprise Technologies* **2019**, *4*, 37–42, doi:10.15587/1729-4061.2019.175914.
475. Petryshchev, A.; Milko, D.; Borysov, V.; Tsymbal, B.; Hevko, I.; Borysova, S.; Semenchuk, A. Studying the Physical-Chemical Transformations at Resourcesaving Reduction Melting of Chromenickel- Containing Metallurgical Waste. *Eastern-European Journal of Enterprise Technologies* **2019**, *2*, 59–64, doi:10.15587/1729-4061.2019.160755.
476. Prabowo, H.; Pratesa, Y.; Tohari, A.; Mudakir, A.; Munir, B.; Soedarsono, J.W. FAILURE ANALYSIS OF GEOTHERMAL PERFORATED CASING TUBING IN H<sub>2</sub>S AND O<sub>2</sub> CONTAINING ENVIRONMENT. *Eastern-European Journal of Enterprise Technologies* **2020**, *6*, 72–78, doi:10.15587/1729-4061.2020.215163.
477. Riastuti, R.; Setiawidiani, D.; Soedarsono, J.W.; Aribowo, S.; Kaban, A.P.S. DEVELOPMENT OF SAGA (ABRUS PRECATORIUS) SEED EXTRACT AS A GREEN CORROSION INHIBITOR IN API 5L GRADE B UNDER 1M HCL SOLUTIONS. *Eastern-European Journal of Enterprise Technologies* **2022**, *4*, 46–56, doi:10.15587/1729-4061.2022.263236.
478. Suleimenov, L.; Zhangabay, N.; Utelbayeva, A.; Murad, M.A.A.; Dosmakanbetova, A.; Abshenov, K.; Bugarova, S.; Moldagaliyev, A.; Imanaliyev, K.; Duissenbekov, B. ESTIMATION OF THE STRENGTH OF VERTICAL CYLINDRICAL LIQUIDSTORAGE TANKS WITH DENTS IN THE WALL. *Eastern-European Journal of Enterprise Technologies* **2022**, *1*, 6–20, doi:10.15587/1729-4061.2022.252599.
479. Svidlo, K.; Sobko, A.; Karpenko, L.; Gavrish, T. Improvement of the Technology Of Shortcrust Baked Semifinished Product on the Basis of Model Functional Compositions. *Eastern-European Journal of Enterprise Technologies* **2021**, *2*, 61–67, doi:10.15587/1729-4061.2021.230328.
480. Turkovskiy, V.; Malinovskiy, A.; Muzychak; Turkovskiy, O. USING THE CONSTANT CURRENT – CONSTANT VOLTAGE CONVERTERS TO EFFECTIVELY REDUCE VOLTAGE FLUCTUATIONS IN THE POWER SUPPLY SYSTEMS FOR ELECTRIC ARC FURNACES. *Eastern-European Journal of Enterprise Technologies* **2020**, *6*, 54–63, doi:10.15587/1729-4061.2020.219439.
481. Volokh, V.; Poliakov, A.; Yamshinskij, M.; Lukianenko, I.; Andreev, A.; Tsymbal, B.; Pedchenko, G.; Chorna, T.; Bilko, T.; Dzyuba, A. DEFINING THE FEATURES OF STRUCTURAL AND PHASE TRANSFORMATIONS IN THE RECYCLING

- OF ANTHROPOGENICMETALLURGICAL WASTE CONTAINING REFRACTORY ELEMENTS. *Eastern-European Journal of Enterprise Technologies* **2022**, *1*, 6–11, doi:10.15587/1729-4061.2022.252321.
482. Bachner, G.; Mayer, J.; Steininger, K.W.; Anger-Kraavi, A.; Smith, A.; Barker, T.S. Uncertainties in Macroeconomic Assessments of Low-Carbon Transition Pathways - The Case of the European Iron and Steel Industry. *Ecological Economics* **2020**, *172*, doi:10.1016/j.ecolecon.2020.106631.
  483. Bahers, J.-B.; Tanguy, A.; Pincetl, S. Metabolic Relationships between Cities and Hinterland: A Political-Industrial Ecology of Energy Metabolism of Saint-Nazaire Metropolitan and Port Area (France). *Ecological Economics* **2020**, *167*, doi:10.1016/j.ecolecon.2019.106447.
  484. Figge, F.; Thorpe, A.; Good, J. Us before Me: A Group Level Approach to the Circular Economy. *Ecological Economics* **2021**, *179*, doi:10.1016/j.ecolecon.2020.106838.
  485. Li, H.; Zhu, X.; Chen, J.; Jiang, F. Environmental Regulations, Environmental Governance Efficiency and the Green Transformation of China's Iron and Steel Enterprises. *Ecological Economics* **2019**, *165*, doi:10.1016/j.ecolecon.2019.106397.
  486. Skelton, A.C.H.; Paroussos, L.; Allwood, J.M. Comparing Energy and Material Efficiency Rebound Effects: An Exploration of Scenarios in the GEM-E3 Macroeconomic Model. *Ecological Economics* **2020**, *173*, doi:10.1016/j.ecolecon.2019.106544.
  487. Altamira-Algarra, B.; Puigagut, J.; Day, J.; Mitsch, W.; Vymazal, J.; Hunter, R.; Garcia, J. A Review of Technologies for Closing the P Loop in Agriculture Runoff: Contributing to the Transition towards a Circular Economy. *Ecological Engineering* **2022**, *177*, doi:10.1016/j.ecoleng.2022.106571.
  488. Chen, Z.; Li, W.; Qiao, O.; Han, Y.; Shi, J.; Li, C. The Corrosiveness of Artificial Soil May Lead to the Collapse of Eco-Engineering Projects on Rock Slopes in Mining Areas. *Ecological Engineering* **2022**, *181*, doi:10.1016/j.ecoleng.2022.106673.
  489. Karczmarczyk, A.; Bus, A.; Baryla, A. Influence of Operation Time, Hydraulic Load and Drying on Phosphate Retention Capacity of Mineral Filters Treating Natural Swimming Pool Water. *Ecological Engineering* **2019**, *130*, 176–183, doi:10.1016/j.ecoleng.2019.02.018.
  490. Awchat, G.D.; Monde, A.S.; Sirsikar, R.A.; Dhanjode, G.C.; Tayade, S.E.; Rathore, S.S. Pro-Ecological Utilization of Crushed Concrete as an Aggregate to Improve the Compressive Strength with Steel Fibers and Styrene-Butadiene Rubber Latex. *Ecological Engineering and Environmental Technology* **2022**, *23*, 95–105, doi:10.12912/27197050/147153.
  491. Bekele, D.A.; Zagorsky, V.A.; Hailu, D.M. Exhaust Toxicity of a Gas Turbine Engine with Step-by-Step PostTreatment: The Environmental Aspect of the Impact on Atmosphere. *Ecological Engineering and Environmental Technology* **2022**, *23*, 193–198, doi:10.12912/27197050/146242.
  492. Chen, W.; Zhang, Q.; Wang, C.; Li, Z.; Geng, Y.; Hong, J.; Cheng, Y. Environmental

- Sustainability Challenges of China's Steel Production: Impact-Oriented Water, Carbon and Fossil Energy Footprints Assessment. *Ecological Indicators* **2022**, *136*, doi:10.1016/j.ecolind.2022.108660.
493. Huo, L.; Zhang, N.; Zhang, X.; Wu, Y. Tree Defoliation Classification Based on Point Distribution Features Derived from Single-Scan Terrestrial Laser Scanning Data. *Ecological Indicators* **2019**, *103*, 782–790, doi:10.1016/j.ecolind.2019.03.036.
  494. Kumari, P.; Maiti, S.K. Bioassessment in the Aquatic Ecosystems of Highly Urbanized Agglomeration in India: An Application of Physicochemical and Macroinvertebrate-Based Indices. *Ecological Indicators* **2020**, *111*, doi:10.1016/j.ecolind.2019.106053.
  495. Li, H.; Zhu, X.; Chen, J. Total Factor Waste Gas Treatment Efficiency of China's Iron and Steel Enterprises and Its Influencing Factors: An Empirical Analysis Based on the Four-Stage SBM-DEA Model. *Ecological Indicators* **2020**, *119*, doi:10.1016/j.ecolind.2020.106812.
  496. Li, S.; Wang, T.; Hou, Z.; Gong, Y.; Feng, L.; Ge, J. Harnessing Terrestrial Laser Scanning to Predict Understory Biomass in Temperate Mixed Forests. *Ecological Indicators* **2021**, *121*, doi:10.1016/j.ecolind.2020.107011.
  497. Liu, Y.; Li, H.; An, H.; Guan, J.; Shi, J.; Han, X. Are the Environmental Impacts, Resource Flows and Economic Benefits Proportional? Analysis of Key Global Trade Routes Based on the Steel Life Cycle. *Ecological Indicators* **2021**, *122*, doi:10.1016/j.ecolind.2020.107306.
  498. Liu, Y.; Li, H.; An, H.; Santagata, R.; Liu, X.; Ulgiati, S. Environmental and Economic Sustainability of Key Sectors in China's Steel Industry Chain: An Application of the Emergy Accounting Approach. *Ecological Indicators* **2021**, *129*, doi:10.1016/j.ecolind.2021.108011.
  499. Massimi, L.; Castellani, F.; Protano, C.; Conti, M.E.; Antonucci, A.; Frezzini, M.A.; Galletti, M.; Mele, G.; Pileri, A.; Ristorini, M.; et al. Lichen Transplants for High Spatial Resolution Biomonitoring of Persistent Organic Pollutants (POPs) in a Multi-Source Polluted Area of Central Italy. *Ecological Indicators* **2021**, *120*, doi:10.1016/j.ecolind.2020.106921.
  500. Massimi, L.; Conti, M.E.; Mele, G.; Ristorini, M.; Astolfi, M.L.; Canepari, S. Lichen Transplants as Indicators of Atmospheric Element Concentrations: A High Spatial Resolution Comparison with PM 10 Samples in a Polluted Area (Central Italy). *Ecological Indicators* **2019**, *101*, 759–769, doi:10.1016/j.ecolind.2018.12.051.
  501. Reich, K.F.; Kunz, M.; von Oheimb, G. A New Index of Forest Structural Heterogeneity Using Tree Architectural Attributes Measured by Terrestrial Laser Scanning. *Ecological Indicators* **2021**, *133*, doi:10.1016/j.ecolind.2021.108412.
  502. Shen, J.; Zhang, X.; Lv, Y.; Yang, X.; Wu, J.; Lin, L.; Zhang, Y. An Improved Emergy Evaluation of the Environmental Sustainability of China's Steel Production from 2005 to 2015. *Ecological Indicators* **2019**, *103*, 55–69, doi:10.1016/j.ecolind.2019.03.051.
  503. Xu, K.; Su, Y.; Liu, J.; Hu, T.; Jin, S.; Ma, Q.; Zhai, Q.; Wang, R.; Zhang, J.; Li, Y.; et

- al. Estimation of Degraded Grassland Aboveground Biomass Using Machine Learning Methods from Terrestrial Laser Scanning Data. *Ecological Indicators* **2020**, *108*, doi:10.1016/j.ecolind.2019.105747.
504. Yan, L.; Zhang, X.; Pan, H.; Wu, J.; Lin, L.; Zhang, Y.; Xu, C.; Xu, M.; Luo, H. Progress of Chinese Ecological Civilization Construction and Obstacles during 2003–2020: Implications from One Set of Emergy-Based Indicator System. *Ecological Indicators* **2021**, *130*, doi:10.1016/j.ecolind.2021.108112.
505. Zhang, X.; Xu, L.; Chen, Y.; Liu, T. Emergy-Based Ecological Footprint Analysis of a Wind Farm in China. *Ecological Indicators* **2020**, *111*, doi:10.1016/j.ecolind.2019.106018.
506. Kurbakov, D.N.; Kuznetsov, V.K.; Sidorova, E.V.; Sarukhanov, A.V.; Dementieva, N.V.; Novikova, N.V. Comparative Assessment of Heavy Metal Pollution of Snowpack by Iron and Steel Foundries. *Ecology and Industry of Russia* **2022**, *26*, 59–65, doi:10.18412/1816-0395-2022-8-59-65.
507. Kwon, O.-H.; Park, H.-S.; Lee, J.S.; Ji, W.H. A Field Study on the Application of Pilot-Scale Vertical Flow Reactor System into the Removal of Fe, as and Mn in Mine Drainage. *Economic and Environmental Geology* **2020**, *53*, 695–701, doi:10.9719/EEG.2020.53.6.695.
508. Romanova, O.A.; Sirotin, D.V. Environmental and Economic Efficiency of Recycling Industrial Waste in the Urals. *Economy of Region* **2021**, *17*, 59–71, doi:10.17059/EKON.REG.2021-1-5.
509. Song, L.; Zhang, C.; Han, J.; Chen, W.-Q. In-Use Product and Steel Stocks Sustaining the Urbanization of Xiamen, China. *Ecosystem Health and Sustainability* **2019**, *5*, 110–123, doi:10.1080/20964129.2019.1598780.
510. Jia, H.; Gao, S.; Duan, Y.; Fu, Q.; Che, X.; Xu, H.; Wang, Z.; Cheng, J. Investigation of Health Risk Assessment and Odor Pollution of Volatile Organic Compounds from Industrial Activities in the Yangtze River Delta Region, China. *Ecotoxicology and Environmental Safety* **2021**, *208*, doi:10.1016/j.ecoenv.2020.111474.
511. Keshavarzi, B.; Najmeddin, A.; Moore, F.; Afshari Moghaddam, P. Risk-Based Assessment of Soil Pollution by Potentially Toxic Elements in the Industrialized Urban and Peri-Urban Areas of Ahvaz Metropolis, Southwest of Iran. *Ecotoxicology and Environmental Safety* **2019**, *167*, 365–375, doi:10.1016/j.ecoenv.2018.10.041.
512. Li, Y.; Dong, G.; Li, J.; Xiang, J.; Yuan, J.; Wang, H.; Wang, X. A Solid-Phase Microextraction Fiber Coating Based on Magnetic Covalent Organic Framework for Highly Efficient Extraction of Triclosan and Methyltriclosan in Environmental Water and Human Urine Samples. *Ecotoxicology and Environmental Safety* **2021**, *219*, doi:10.1016/j.ecoenv.2021.112319.
513. Lu, J.; Ma, L.; Cheng, C.; Pei, C.; Chan, C.K.; Bi, X.; Qin, Y.; Tan, H.; Zhou, J.; Chen, M.; et al. Real Time Analysis of Lead-Containing Atmospheric Particles in Guangzhou during Wintertime Using Single Particle Aerosol Mass Spectrometry. *Ecotoxicology and Environmental Safety* **2019**, *168*, 53–63,

- doi:10.1016/j.ecoenv.2018.10.006.
514. Shen, X.; Yang, Q.; Shen, J.; Yang, L.; Wang, M.; Yang, Y.; Liu, G. Characterizing the Emissions of Polybrominated Dibenzo-p-Dioxins and Dibenzofurans (PBDD/Fs) from Electric Arc Furnaces during Steel-Making. *Ecotoxicology and Environmental Safety* **2021**, *208*, doi:10.1016/j.ecoenv.2020.111722.
515. Song, S.; Zhou, X.; Guo, C.; Zhang, H.; Zeng, T.; Xie, Y.; Liu, J.; Zhu, C.; Sun, X. Emission Characteristics of Polychlorinated, Polybrominated and Mixed Polybrominated/Chlorinated Dibenzo-p-Dioxins and Dibenzofurans (PCDD/Fs, PBDD/Fs, and PBCDD/Fs) from Waste Incineration and Metallurgical Processes in China. *Ecotoxicology and Environmental Safety* **2019**, *184*, doi:10.1016/j.ecoenv.2019.109608.
516. Wang, G.; Zhang, Q.; Du, W.; Lin, R.; Li, J.; Ai, F.; Yin, Y.; Ji, R.; Wang, X.; Guo, H. In-Situ Immobilization of Cadmium-Polluted Upland Soil: A Ten-Year Field Study. *Ecotoxicology and Environmental Safety* **2021**, *207*, doi:10.1016/j.ecoenv.2020.111275.
517. Yang, L.; Li, S.; Wen, T.; Meng, F.; Chen, G.; Qian, X. Influence of Ferrous-Metal Production on Mercury Contamination and Fractionation in Farmland Soil around Five Typical Iron and Steel Enterprises of Tangshan, China. *Ecotoxicology and Environmental Safety* **2020**, *188*, doi:10.1016/j.ecoenv.2019.109774.
518. Burhagohain, P.; Sharma, G.; Bujarbaruah, P.M. Investigation of a Few Oxazolone Molecules as Corrosion Inhibitor for API5LX60 Steel in 1N H<sub>2</sub>SO<sub>4</sub> Solution. *Egyptian Journal of Petroleum* **2022**, *31*, 37–45, doi:10.1016/j.ejpe.2022.06.006.
519. Peng, H.; Cui, X.; Jia, D.; Lv, Y. Energy Direct Consumption and Environmental Indirect Costs of Chinese Steel Trade. *Ekoloji* **2019**, *28*, 1691–1698.
520. Geroe, S. Cutting through Complexity: Why Did Australian Electricity Prices Skyrocket, and Are Recent Reforms a Useful Solution? *Electricity Journal* **2022**, *35*, doi:10.1016/j.tej.2022.107155.
521. Tahir, M.N. Synthesis of Hierarchically Organized  $\alpha$ -Fe<sub>2</sub>O<sub>3</sub> Nanostructures for the Photocatalytic Degradation of Methylene Blue. *Emergent Materials* **2020**, *3*, 605–612, doi:10.1007/s42247-020-00127-9.
522. Yang, Q.; Yang, L.; Shen, J.; Yang, Y.; Wang, M.; Liu, X.; Shen, X.; Li, C.; Xu, J.; Li, F.; et al. Polychlorinated Dibenzo-p-Dioxins and Dibenzofurans (PCDD/Fs) Emissions from Electric Arc Furnaces for Steelmaking. *Emerging Contaminants* **2020**, *6*, 330–336, doi:10.1016/j.emcon.2020.08.005.
523. Levitskyi, A.S.; Zaitsev Ievgen, O.; Panchik, M.V. Method for Monitoring the Stator Core of a Powerful Turbo Generator. *Energetika. Proceedings of CIS Higher Education Institutions and Power Engineering Associations* **2021**, *64*, 303–313, doi:10.21122/1029-7448-2021-64-4-303-313.
524. Abhi, T.D.; Norouzi, O.; Macdermid-Watts, K.; Heidari, M.; Tasnim, S.; Dutta, A. Miscanthus to Biocarbon for Canadian Iron and Steel Industries: An Innovative Approach. *Energies* **2021**, *14*, doi:10.3390/en14154493.
525. Amaechi, C.V.; Reda, A.; Ja'e, I.A.; Wang, C.; An, C. Guidelines on Composite

- Flexible Risers: Monitoring Techniques and Design Approaches. *Energies* **2022**, *15*, doi:10.3390/en15144982.
526. Andersson, J. Application of Liquid Hydrogen Carriers in Hydrogen Steelmaking. *Energies* **2021**, *14*, doi:10.3390/en14051392.
527. Atsonios, I.; Mandilaras, I.; Founti, M. Thermal Assessment of a Novel Drywall System Insulated with VIPs. *Energies* **2019**, *12*, doi:10.3390/en12122373.
528. Aydogan, A.; Atalar, F.; Yilmaz, A.E.; Rozga, P. Using the Method of Harmonic Distortion Analysis in Partial Discharge Assessment in Mineral Oil in a Non-Uniform Electric Field. *Energies* **2020**, *13*, doi:10.3390/en13184830.
529. Bampaou, M.; Panopoulos, K.; Seferlis, P.; Sasiain, A.; Haag, S.; Wolf-Zoellner, P.; Lehner, M.; Rog, L.; Rompalski, P.; Kolb, S.; et al. Economic Evaluation of Renewable Hydrogen Integration into Steelworks for the Production of Methanol and Methane. *Energies* **2022**, *15*, doi:10.3390/en15134650.
530. Bampaou, M.; Panopoulos, K.; Seferlis, P.; Voutetakis, S.; Martino, I.; Petrucciani, A.; Zaccara, A.; Colla, V.; Dettori, S.; Annunziata Branca, T.; et al. Integration of Renewable Hydrogen Production in Steelworks Off-Gases for the Synthesis of Methanol and Methane. *Energies* **2021**, *14*, doi:10.3390/en14102904.
531. Bargiacchi, E.; Thonemann, N.; Geldermann, J.; Antonelli, M.; Desideri, U. Life Cycle Assessment of Synthetic Natural Gas Production from Different CO<sub>2</sub> Sources: A Cradle-to-Gate Study. *Energies* **2020**, *13*, doi:10.3390/en13174579.
532. Bhaskar, A.; Assadi, M.; Somehsaraei, H.N. Decarbonization of the Iron and Steel Industry with Direct Reduction of Iron Ore with Green Hydrogen. *Energies* **2020**, *13*, doi:10.3390/en13030758.
533. Bond, N.; Symonds, R.; Hughes, R. Pressurized Chemical Looping for Direct Reduced Iron Production: Carbon Neutral Process Configuration and Performance. *Energies* **2022**, *15*, doi:10.3390/en15145219.
534. Bortnowski, P.; Gładysiewicz, L.; Król, R.; Ozdoba, M. Models of Transverse Vibration in Conveyor Belt—Investigation and Analysis. *Energies* **2021**, *14*, doi:10.3390/en14144153.
535. Broniewicz, E.; Dec, K. Environmental Impact of Demolishing a Steel Structure Design for Disassembly. *Energies* **2022**, *15*, doi:10.3390/en15197358.
536. Broniewicz, F.; Broniewicz, M. Sustainability of Steel Office Buildings. *Energies* **2020**, *13*, doi:10.3390/en13143723.
537. Cormos, A.-M.; Dragan, S.; Petrescu, L.; Sandu, V.; Cormos, C.-C. Techno-Economic and Environmental Evaluations of Decarbonized Fossil-Intensive Industrial Processes by Reactive Absorption and Adsorption CO<sub>2</sub> Capture Systems. *Energies* **2020**, *13*, doi:10.3390/en13051268.
538. Díaz, J.; Fernández, F.J.; Suárez, I. Hot Metal Temperature Prediction at Basic-Lined Oxygen Furnace (BOF) Converter Using IR Thermometry and Forecasting Techniques. *Energies* **2019**, *12*, doi:10.3390/en12173235.
539. Digiesi, S.; Mummolo, G.; Vitti, M. Minimum Emissions Configuration of a Green Energy–Steel System: An Analytical Model. *Energies* **2022**, *15*,



- doi:10.3390/en15093324.
540. Dock, J.; Wallner, S.; Traupmann, A.; Kienberger, T. Provision of Demand-Side Flexibility through the Integration of Power-to-Gas Technologies in an Electric Steel Mill. *Energies* **2022**, *15*, doi:10.3390/en15165815.
541. Duan, Y.; Han, Z.; Mu, H.; Yang, J.; Li, Y. Research on the Impact of Various Emission Reduction Policies on China's Iron and Steel Industry Production and Economic Level under the Carbon Trading mechanism. *Energies* **2019**, *12*, doi:10.3390/en12091624.
542. Eltsov, T.; Patzek, T.W. Beyond Carbon Steel: Detecting Wellbore Shape and Cavities, and Cement Imperfections in Cased Wells. *Energies* **2019**, *12*, doi:10.3390/en12214211.
543. Eriksson, J.-E.; Zevenhoven, M.; Yrjas, P.; Brink, A.; Hupa, L. Corrosion of Heat Transfer Materials by Potassium-Contaminated Ilmenite Bed Particles in Chemical-Looping Combustion of Biomass. *Energies* **2022**, *15*, doi:10.3390/en15082740.
544. Facchini, F.; Mossa, G.; Mummolo, G.; Vitti, M. An Economic Model to Assess Profitable Scenarios of Eaf-Based Steelmaking Plants under Uncertain Conditions. *Energies* **2021**, *14*, doi:10.3390/en14217395.
545. Fořt, J.; Kočí, J.; Černý, R. Environmental Efficiency Aspects of Basalt Fibers Reinforcement in Concrete Mixtures. *Energies* **2021**, *14*, doi:10.3390/en14227736.
546. Franko, J.; Du, S.; Kallweit, S.; Duelberg, E.; Engemann, H. Design of a Multi-Robot System for Wind Turbine Maintenance. *Energies* **2020**, *13*, doi:10.3390/en13102552.
547. Gajdzik, B.; Sroka, W.; Vveinhardt, J. Energy Intensity of Steel Manufactured Utilising Eaf Technology as a Function of Investments Made: The Case of the Steel Industry in Poland. *Energies* **2021**, *14*, doi:10.3390/en14165152.
548. Gao, Q.; Wu, T.; Liu, L.; Yao, Y.; Jiang, B. Prediction of Wall and Indoor Hygrothermal Properties of Rammed Earth Folk House in Northwest Sichuan. *Energies* **2022**, *15*, doi:10.3390/en15051936.
549. García, S.G.; Montequín, V.R.; Piloñeta, M.D.; Lougedo, S.T. Multi-Objective Optimization of Steel off-Gas in Cogeneration Using the  $\epsilon$ -Constraint Method: A Combined Coke Oven and Converter Gas Case Study. *Energies* **2021**, *14*, doi:10.3390/en14102741.
550. Gavrilidis, I.; Huang, Y. Finite Element Analysis of Tidal Turbine Blade Subjected to Impact Loads from Sea Animals. *Energies* **2021**, *14*, doi:10.3390/en14217208.
551. Ghisellini, P.; Ncube, A.; D'ambrosio, G.; Passaro, R.; Ulgiati, S. Potential Energy Savings from Circular Economy Scenarios Based on Construction and Agri-Food Waste in Italy. *Energies* **2021**, *14*, doi:10.3390/en14248561.
552. Gkantou, M.; Rebelo, C.; Baniotopoulos, C. Life Cycle Assessment of Tall Onshore Hybrid Steel Wind Turbine Towers. *Energies* **2020**, *13*, doi:10.3390/en13153950.
553. Głowacki, T. Monitoring the Geometry of Tall Objects in Energy Industry. *Energies* **2022**, *15*, doi:10.3390/en15072324.
554. Grammelis, P.; Margaritis, N.; Dallas, P.; Rakopoulos, D.; Mavrias, G. A Review

- on Management of End of Life Tires (Elts) and Alternative Uses of Textile Fibers. *Energies* **2021**, *14*, doi:10.3390/en14030571.
555. Guo, H.; Yang, Y.; Cheng, T.; Zhou, H.; Wang, W.; Du, X. Tower Configuration Impacts on the Thermal and Flow Performance of Steel-Truss Natural Draft Dry Cooling System. *Energies* **2021**, *14*, doi:10.3390/en14072002.
556. Ige, O.; Olanrewaju, O.; Duffy, K.; Collins, O. Environmental Impact Analysis of Portland Cement (CEM1) Using the Midpoint Method. *Energies* **2022**, *15*, doi:10.3390/en15072708.
557. Jara, P.G.B.; Castro, M.T.; Esparcia, E.A., Jr.; Ocon, J.D. Quantifying the Techno-Economic Potential of Grid-Tied Rooftop Solar Photovoltaics in the Philippine Industrial Sector. *Energies* **2020**, *13*, doi:10.3390/en13195070.
558. Jaramillo-Morán, M.A.; García-García, A. Applying Artificial Neural Networks to Forecast European Union Allowance Prices: The Effect of Information from Pollutant-Related Sectors. *Energies* **2019**, *12*, doi:10.3390/en12234439.
559. Józwiak, P.; Hercog, J.; Kiedrzyńska, A.; Badyda, K.; Olevano, D. Thermal Effects of Natural Gas and Syngas Co-Firing System on Heat Treatment Process in the Preheating Furnace. *Energies* **2020**, *13*, doi:10.3390/en13071698.
560. Kang, J.O.; Kim, S.C. Heat Transfer Characteristics of Heat Exchangers for Waste Heat Recovery from a Billet Casting Process. *Energies* **2019**, *12*, doi:10.3390/en12142695.
561. Karimi, F. Stakeholders' Risk Perceptions of Decarbonised Energy System: Insights into Patterns of Behaviour. *Energies* **2021**, *14*, doi:10.3390/en14217205.
562. Karlsson, I.; Rootzén, J.; Toktarova, A.; Odenberger, M.; Johnsson, F.; Göransson, L. Roadmap for Decarbonization of the Building and Construction Industry—A Supply Chain Analysis Including Primary Production of Steel and Cement. *Energies* **2020**, *13*, doi:10.3390/en13164136.
563. Kasner, R.; Kruszelnicka, W.; Bałdowska-Witos, P.; Flizikowski, J.; Tomporowski, A. Sustainable Wind Power Plant Modernization. *Energies* **2020**, *13*, doi:10.3390/en13061461.
564. Kawada, Y.; Shimizu, H. Development of an Electrostatic Precipitator with Porous Carbon Electrodes to Collect Carbon Particles. *Energies* **2019**, *12*, doi:10.3390/en12142805.
565. Kim, M.-H.; Lee, E.-B. A Forecast Model for the Level of Engineering Maturity Impact on Contractor's Procurement and Construction Costs for Offshore EPC Megaprojects. *Energies* **2019**, *12*, doi:10.3390/en12122295.
566. Koroma, M.S.; Brown, N.; Cardellini, G.; Messagie, M. Prospective Environmental Impacts of Passenger Cars under Different Energy and Steel Production Scenarios. *Energies* **2020**, *13*, doi:10.3390/en13236236.
567. Kosyrczyk, L.; Stelmach, S.; Gaska, K.; Generowicz, A.; Iwaszczuk, N.; Kardaś, D. Optimization of Thermal Parameters of the Coke Oven Battery by Modified Methodology of Temperature Measurement in Heating Flues as the Management Tool in the Cokemaking Industry. *Energies* **2021**, *14*, doi:10.3390/en14040904.

568. Lee, C.; Kim, I.; Hong, J. Experimental Investigation of Air–Fuel Mixing Effects on Flame Characteristics in a Direct Fired Burner. *Energies* **2021**, *14*, doi:10.3390/en14123552.
569. Li, D.; Di, Q.; Zhang, H.; Zhang, D.; Han, Z.; Duan, Y. Research on the Impact of Output Adjustment Strategy and Carbon Tax Policy on the Stability of the Steel Market. *Energies* **2022**, *15*, doi:10.3390/en15186678.
570. Li, H.; Deng, Q.; Zhang, J.; Olanipekun, A.O.; Lyu, S. Environmental Impact Assessment of Transportation Infrastructure in the Life Cycle: Case Study of a Fast Track Transportation Project in China. *Energies* **2019**, *12*, doi:10.3390/en12061015.
571. Li, J.; Wang, C.; Song, X.; Jin, X.; Zhao, S.; Qi, Z.; Zeng, H.; Zhu, S.; Jiang, F.; Ni, W.; et al. Market Stakeholder Analysis of the Practical Implementation of Carbonation Curing on Steel Slag for Urban Sustainable Governance. *Energies* **2022**, *15*, doi:10.3390/en15072399.
572. Liu, H.; Du, M.; Zhang, B.; Lin, Z.; Liu, C.; Wang, F. Study on the Combined Mining Scheme for Coal Resources under High-Voltage Pylons and the Reinforcement for Pylons. *Energies* **2022**, *15*, doi:10.3390/en15113978.
573. Liu, Q.; Li, N.; Yongga, A.; Duan, J.; Yan, W. The Evaluation of the Corrosion Rates of Alloys Applied to the Heating Tower Heat Pump (HTHP) by Machine Learning. *Energies* **2021**, *14*, doi:10.3390/en14071972.
574. Liu, Y.; Qiu, W.; Duan, D. Using Energy-Absorbing Dampers to Solve the Problem of Large Deformation in Soft-Rock Tunnels: A Case Study. *Energies* **2022**, *15*, doi:10.3390/en15051916.
575. Mishina, Y.; Sasaki, Y.; Yokoyama, K. Study on Worldwide Embodied Impacts of Construction: Analysis of Wiod Release 2016. *Energies* **2021**, *14*, doi:10.3390/en14113172.
576. Mishra, P.C.; Gupta, A.; Samanta, S.; Ishaq, R.B.; Khoshnaw, F. Framework for Energy-Averaged Emission Mitigation Technique Adopting Gasoline-Methanol Blend Replacement and Piston Design Exchange. *Energies* **2022**, *15*, doi:10.3390/en15197188.
577. Murugan, M.; Walock, M.; Ghoshal, A.; Knapp, R.; Caesley, R. Embedded Temperature Sensor Evaluations for Turbomachinery Component Health Monitoring. *Energies* **2021**, *14*, doi:10.3390/en14040852.
578. Netzelmann, U.; Mross, A.; Waschkes, T.; Weber, D.; Toma, E.; Neurohr, H. Nondestructive Testing of the Integrity of Solid Oxide Fuel Cell Stack Elements by Ultrasound and Thermographic Techniques. *Energies* **2022**, *15*, doi:10.3390/en15030831.
579. Niekurzak, M.; Mikulik, J. Modeling of Energy Consumption and Reduction of Pollutant Emissions in a Walking Beam Furnace Using the Expert Method—Case Study. *Energies* **2021**, *14*, doi:10.3390/en14238099.
580. Niesler, M.; Stecko, J.; Stelmach, S.; Kwiecińska-mydlak, A. Biochars in Iron Ores Sintering Process: Effect on Sinter Quality and Emission. *Energies* **2021**, *14*, doi:10.3390/en14133749.

- 
581. Nurdawati, A.; Urban, F. Towards Deep Decarbonisation of Energy-Intensive Industries: A Review of Current Status, Technologies and Policies. *Energies* **2021**, *14*, doi:10.3390/en14092408.
582. Oliveira, M.C.; Iten, M.; Cruz, P.L.; Monteiro, H. Review on Energy Efficiency Progresses, Technologies and Strategies in the Ceramic Sector Focusing on Waste Heat Recovery. *Energies* **2020**, *13*, doi:10.3390/en13226096.
583. Peric, M.; Nizetic, S.; Tonkovic, Z.; Garasic, I.; Horvat, I.; Boras, I. Numerical Simulation and Experimental Investigation of Temperature and Residual Stress Distributions in a Circular Patch Welded Structure. *Energies* **2020**, *13*, doi:10.3390/en13205423.
584. Perpiñán, J.; Bailera, M.; Romeo, L.M.; Peña, B.; Eveloy, V. CO<sub>2</sub> Recycling in the Iron and Steel Industry via Power-to-Gas and Oxy-Fuel Combustion. *Energies* **2021**, *14*, doi:10.3390/en14217090.
585. Phila, A.; Thianpong, C.; Eiamsa-Ard, S. Influence of Geometric Parameters of Alternate Axis Twisted Baffles on the Local Heat Transfer Distribution and Pressure Drop in a Rectangular Channel Using a Transient Liquid Crystal Technique. *Energies* **2019**, *12*, doi:10.3390/en12122341.
586. Pissot, S.; Thunman, H.; Samuelsson, P.; Seemann, M. Production of Negative-Emissions Steel Using a Reducing Gas Derived from Dfb Gasification. *Energies* **2021**, *14*, doi:10.3390/en14164835.
587. Qin, J.; Gao, L.; Tu, W.; He, J.; Tang, J.; Ma, S.; Zhao, X.; Zhu, X.; Brindha, K.; Tao, H. Decomposition and Decoupling Analysis of Carbon Emissions in Xinjiang Energy Base, China. *Energies* **2022**, *15*, doi:10.3390/en15155526.
588. Radziemska, M.; Dzieciol, J.; Gusiatin, Z.; Bes, A.; Sas, W.; Gluchowski, A.; Gawryszewska, B.; Mazur, Z.; Brtnicky, M. Recycling of Blast Furnace and Coal Slags in Aided Phytostabilisation of Soils Highly Polluted with Heavy Metals. *Energies* **2021**, *14*, doi:10.3390/en14144300.
589. Ren, S.; Wang, P.; Lin, Z.; Zhao, D. The Policy Choice and Economic Assessment of High Emissions Industries to Achieve the Carbon Peak Target under Energy Shortage—A Case Study of Guangdong Province. *Energies* **2022**, *15*, doi:10.3390/en15186750.
590. Roque, E.; Vicente, R.; Almeida, R.M.S.F. Indoor Thermal Environment Challenges of Light Steel Framing in the Southern European Context. *Energies* **2021**, *14*, doi:10.3390/en14217025.
591. Roque, E.; Vicente, R.; Almeida, R.M.S.F.; Ferreira, V.M. The Impact of Thermal Inertia on the Indoor Thermal Environment of Light Steel Framing Constructions. *Energies* **2022**, *15*, doi:10.3390/en15093061.
592. Rossouw, E.; Doorsamy, W. Predictive Maintenance Framework for Cathodic Protection Systems Using Data Analytics. *Energies* **2021**, *14*, doi:10.3390/en14185805.
593. Santin, M.; Chinese, D.; Saro, O.; De Angelis, A.; Zugliano, A. Carbon and Water Footprint of Energy Saving Options for the Air Conditioning of Electric Cabins at

- Industrial Sites. *Energies* **2019**, *12*, doi:10.3390/en12193627.
594. Schiavi, P.G.; Dos Santos Martins Padoan, F.C.; Altimari, P.; Pagnanelli, F. Cryo-Mechanical Treatment and Hydrometallurgical Process for Recycling Li-MnO<sub>2</sub> primary Batteries with the Direct Production of LiMnPO<sub>4</sub> nanoparticles. *Energies* **2020**, *13*, doi:10.3390/en13154004.
595. Song, J.-H.; Park, C.-Y.; Jeong, J.-W. Energy Performance Evaluation for Exterior Insulation System Consisting of Truss-Form Wire-Frame Mullion Filled with Glasswool. *Energies* **2020**, *13*, doi:10.3390/en13174486.
596. Šporin, J.; Balaško, T.; Mrvar, P.; Janc, B.; Vukelić, Ž. Change of the Properties of Steel Material of the Roller Cone Bit Due to the Influence of the Drilling Operational Parameters and Rock Properties. *Energies* **2020**, *13*, doi:10.3390/en13225949.
597. Szpetulski, J.; Stawiski, B.; Witkowski, P. Tests Regarding the Effect of Dispersed Reinforcement Made with a Prototype Device from PET Beverage Bottles on the Strength Properties of Concrete. *Energies* **2022**, *15*, doi:10.3390/en15072415.
598. Taler, D.; Sobota, T.; Jaremkiewicz, M.; Taler, J. Influence of the Thermometer Inertia on the Quality of Temperature Control in a Hot Liquid Tank Heated with Electric Energy. *Energies* **2020**, *13*, doi:10.3390/en13154039.
599. Teleszewski, T.J.; Krawczyk, D.A.; Rodero, A. Reduction of Heat Losses Using Quadruple Heating Pre-Insulated Networks: A Case Study. *Energies* **2019**, *12*, doi:10.3390/en12244699.
600. Teodosio, B.; Bonacci, F.; Seo, S.; Baduge, K.S.K.; Mendis, P. Multi-Criteria Analysis of a Developed Prefabricated Footing System on Reactive Soil Foundation. *Energies* **2021**, *14*, doi:10.3390/en14227515.
601. Toktarova, A.; Karlsson, I.; Rootzén, J.; Göransson, L.; Odenberger, M.; Johnsson, F. Pathways for Low-Carbon Transition of the Steel Industry—A Swedish Case Study. *Energies* **2020**, *13*, doi:10.3390/en13153840.
602. Tom, L.; Khowja, M.; Vakil, G.; Gerada, C. Commercial Aircraft Electrification—Current State and Future Scope. *Energies* **2021**, *14*, doi:10.3390/en14248381.
603. Verma, S.; Paul, A.R.; Haque, N. Selected Environmental Impact Indicators Assessment of Wind Energy in India Using a Life Cycle Assessment. *Energies* **2022**, *15*, doi:10.3390/en15113944.
604. Wolf-Zoellner, P.; Medved, A.R.; Lehner, M.; Kieberger, N.; Rechberger, K. In Situ Catalytic Methanation of Real Steelworks Gases. *Energies* **2021**, *14*, doi:10.3390/en14238131.
605. Wyczółkowski, R.; Gała, M.; Szwaja, S.; Piotrowski, A. Determination of the Radiation Exchange Factor in the Bundle of Steel Round Bars. *Energies* **2021**, *14*, doi:10.3390/en14175263.
606. Yang, H.; Kikuta, K.; Hayashi, M. Research on Carbon Reduction of Residential Buildings in Severe Cold Regions Based on Renovation of Envelopes. *Energies* **2022**, *15*, doi:10.3390/en15051873.
607. Yang, H.; Ma, L.; Li, Z. A Method for Analyzing Energy-Related Carbon Emissions

- and the Structural Changes: A Case Study of China from 2005 to 2015. *Energies* **2020**, *13*, doi:10.3390/en13082076.
608. Yustanti, E.; Wardhono, E.Y.; Mursito, A.T.; Alhamidi, A. Types and Composition of Biomass in Biocoke Synthesis with the Coal Blending Method. *Energies* **2021**, *14*, doi:10.3390/en14206570.
609. Zulkania, A.; Rochmadi, R.; Hidayat, M.; Cahyono, R.B. Reduction Reactivity of Low Grade Iron Ore-Biomass Pellets for a Sustainable Ironmaking Process. *Energies* **2022**, *15*, doi:10.3390/en15010137.
610. Chang, Y.; Lei, S.; Teng, J.; Zhang, J.; Zhang, L.; Xu, X. The Energy Use and Environmental Emissions of High-Speed Rail Transportation in China: A Bottom-up Modeling. *Energy* **2019**, *182*, 1193–1201, doi:10.1016/j.energy.2019.06.120.
611. Chen, D.; Li, J.; Wang, Z.; Lu, B.; Chen, G. Hierarchical Model to Find the Path Reducing CO<sub>2</sub> Emissions of Integrated Iron and Steel Production. *Energy* **2022**, *258*, doi:10.1016/j.energy.2022.124887.
612. Couvreur, K.; Beyne, W.; De Paepe, M.; Lecompte, S. Hot Water Storage for Increased Electricity Production with Organic Rankine Cycle from Intermittent Residual Heat Sources in the Steel Industry. *Energy* **2020**, *200*, doi:10.1016/j.energy.2020.117501.
613. Duan, W.; Wu, Q.; Li, P.; Cheng, P. Techno-Economic Analysis of a Novel Full-Chain Blast Furnace Slag Utilization System. *Energy* **2022**, *242*, doi:10.1016/j.energy.2021.123049.
614. Elshkaki, A. Material-Energy-Water-Carbon Nexus in China's Electricity Generation System up to 2050. *Energy* **2019**, *189*, doi:10.1016/j.energy.2019.116355.
615. Guo, F.; Liang, S.; Zhao, X.; Jia, X.; Peng, K.; Jiang, X.; Qian, L. Catalytic Reforming of Biomass Pyrolysis Tar Using the Low-Cost Steel Slag as Catalyst. *Energy* **2019**, *189*, doi:10.1016/j.energy.2019.116161.
616. Jiao, K.; Feng, G.; Zhang, J.; Wang, C.; Zhang, L. Effect of Multi-Component Gases on the Behavior and Mechanism of Carbon Deposition in Hydrogen-Rich Blast Furnaces. *Energy* **2023**, *263*, doi:10.1016/j.energy.2022.125518.
617. Jóźwiak, P.; Hercog, J.; Kiedrzyńska, A.; Badyda, K. CFD Analysis of Natural Gas Substitution with Syngas in the Industrial Furnaces. *Energy* **2019**, *179*, 593–602, doi:10.1016/j.energy.2019.04.179.
618. Kavyashree; Parveen, S.; Sharma, S.K.; Pandey, S.N. Solid-State Symmetric Supercapacitor Based on Y Doped Sr(OH)<sub>2</sub> Using SILAR Method. *Energy* **2020**, *197*, doi:10.1016/j.energy.2020.117163.
619. Kermeli, K.; Edelenbosch, O.Y.; Crijns-Graus, W.; van Ruijven, B.J.; van Vuuren, D.P.; Worrell, E. Improving Material Projections in Integrated Assessment Models: The Use of a Stock-Based versus a Flow-Based Approach for the Iron and Steel Industry. *Energy* **2022**, *239*, doi:10.1016/j.energy.2021.122434.
620. Lee, K.-T.; Cheng, C.-L.; Lee, D.-S.; Chen, W.-H.; Vo, D.-V.N.; Ding, L.; Lam, S.S. Spent Coffee Grounds Biochar from Torrefaction as a Potential Adsorbent for Spilled Diesel Oil Recovery and as an Alternative Fuel. *Energy* **2022**, *239*,

- doi:10.1016/j.energy.2021.122467.
621. Li, F.; Chu, M.; Tang, J.; Liu, Z.; Guo, J.; Yan, R.; Liu, P. Thermodynamic Performance Analysis and Environmental Impact Assessment of an Integrated System for Hydrogen Generation and Steelmaking. *Energy* **2022**, *241*, doi:10.1016/j.energy.2021.122922.
622. Li, R.; Zhang, H.; Wang, H.; Tu, Q.; Wang, X. Integrated Hybrid Life Cycle Assessment and Contribution Analysis for CO<sub>2</sub> Emission and Energy Consumption of a Concentrated Solar Power Plant in China. *Energy* **2019**, *174*, 310–322, doi:10.1016/j.energy.2019.02.066.
623. Li, Y.; Wu, N.; Ning, F.; Gao, D.; Hao, X.; Chen, Q.; Liu, C.; Sun, J. Hydrate-Induced Clogging of Sand-Control Screen and Its Implication on Hydrate Production Operation. *Energy* **2020**, *206*, doi:10.1016/j.energy.2020.118030.
624. Li, Z.; Dai, H.; Song, J.; Sun, L.; Geng, Y.; Lu, K.; Hanaoka, T. Assessment of the Carbon Emissions Reduction Potential of China's Iron and Steel Industry Based on a Simulation Analysis. *Energy* **2019**, *183*, 279–290, doi:10.1016/j.energy.2019.06.099.
625. Liang, Z.; Gui, Y.; Wang, Y.; Zhao, Q. Corrosion Performance of Heat-Resisting Steels and Alloys in Supercritical Carbon Dioxide at 650 °C and 15 MPa. *Energy* **2019**, *175*, 345–352, doi:10.1016/j.energy.2019.03.014.
626. Liu, F.; Zheng, L.; Zhang, R. Emissions and Thermal Efficiency for Premixed Burners in a Condensing Gas Boiler. *Energy* **2020**, *202*, doi:10.1016/j.energy.2020.117449.
627. Llera, R.; Vigil, M.; Díaz-Díaz, S.; Martínez Huerta, G.M. Prospective Environmental and Techno-Economic Assessment of Steam Production by Means of Heat Pipes in the Steel Industry. *Energy* **2022**, *239*, doi:10.1016/j.energy.2021.122334.
628. Maznoy, A.; Kirdeyashkin, A.; Pichugin, N.; Zambalov, S.; Petrov, D. Development of a New Infrared Heater Based on an Annular Cylindrical Radiant Burner for Direct Heating Applications. *Energy* **2020**, *204*, doi:10.1016/j.energy.2020.117965.
629. Mazzetti, M.J.; Hagen, B.A.L.; Skaugen, G.; Lindqvist, K.; Lundberg, S.; Kristensen, O.A. Achieving 50% Weight Reduction of Offshore Steam Bottoming Cycles. *Energy* **2021**, *230*, doi:10.1016/j.energy.2021.120634.
630. Na, H.; Sun, J.; Qiu, Z.; He, J.; Yuan, Y.; Yan, T.; Du, T. A Novel Evaluation Method for Energy Efficiency of Process Industry — A Case Study of Typical Iron and Steel Manufacturing Process. *Energy* **2021**, *233*, doi:10.1016/j.energy.2021.121081.
631. Na, H.; Sun, J.; Qiu, Z.; Yuan, Y.; Du, T. Optimization of Energy Efficiency, Energy Consumption and CO<sub>2</sub> Emission in Typical Iron and Steel Manufacturing Process. *Energy* **2022**, *257*, doi:10.1016/j.energy.2022.124822.
632. Ng, W.L.; Chin, M.Y.; Zhou, J.; Woon, K.S.; Ching, A.Y. The Overlooked Criteria in Green Building Certification System: Embodied Energy and Thermal Insulation on Non-Residential Building with a Case Study in Malaysia. *Energy* **2022**, *259*, doi:10.1016/j.energy.2022.124912.

633. Ouyang, X.; Chen, J.; Du, K. Energy Efficiency Performance of the Industrial Sector: From the Perspective of Technological Gap in Different Regions in China. *Energy* **2021**, *214*, doi:10.1016/j.energy.2020.118865.
634. Ren, K.; Tang, X.; Wang, P.; Willerström, J.; Höök, M. Bridging Energy and Metal Sustainability: Insights from China's Wind Power Development up to 2050. *Energy* **2021**, *227*, doi:10.1016/j.energy.2021.120524.
635. Rueda-Bayona, J.G.; Cabello Eras, J.J.; Chaparro, T.R. Impacts Generated by the Materials Used in Offshore Wind Technology on Human Health, Natural Environment and Resources. *Energy* **2022**, *261*, doi:10.1016/j.energy.2022.125223.
636. Schmitz, N.; Sankowski, L.; Kaiser, F.; Schwotzer, C.; Echterhof, T.; Pfeifer, H. Towards CO<sub>2</sub>-Neutral Process Heat Generation for Continuous Reheating Furnaces in Steel Hot Rolling Mills – A Case Study. *Energy* **2021**, *224*, doi:10.1016/j.energy.2021.120155.
637. Shin, S.; Lee, J.-K.; Lee, I.-B. Development and Techno-Economic Study of Methanol Production from Coke-Oven Gas Blended with Linz Donawitz Gas. *Energy* **2020**, *200*, doi:10.1016/j.energy.2020.117506.
638. Si, T.; Wang, C.; Liu, R.; Guo, Y.; Yue, S.; Ren, Y. Multi-Criteria Comprehensive Energy Efficiency Assessment Based on Fuzzy-AHP Method: A Case Study of Post-Treatment Technologies for Coal-Fired Units. *Energy* **2020**, *200*, doi:10.1016/j.energy.2020.117533.
639. Skoczkowski, T.; Verdolini, E.; Bielecki, S.; Kochański, M.; Korczak, K.; Węglarz, A. Technology Innovation System Analysis of Decarbonisation Options in the EU Steel Industry. *Energy* **2020**, *212*, doi:10.1016/j.energy.2020.118688.
640. Sun, J.; Na, H.; Yan, T.; Qiu, Z.; Yuan, Y.; He, J.; Li, Y.; Wang, Y.; Du, T. A Comprehensive Assessment on Material, Exergy and Emission Networks for the Integrated Iron and Steel Industry. *Energy* **2021**, *235*, doi:10.1016/j.energy.2021.121429.
641. Trojan, M. Modeling of a Steam Boiler Operation Using the Boiler Nonlinear Mathematical Model. *Energy* **2019**, *175*, 1194–1208, doi:10.1016/j.energy.2019.03.160.
642. Wu, R.; Geng, Y.; Cui, X.; Gao, Z.; Liu, Z. Reasons for Recent Stagnancy of Carbon Emissions in China's Industrial Sectors. *Energy* **2019**, *172*, 457–466, doi:10.1016/j.energy.2019.01.156.
643. Yilmaz, K.; Kayfeci, M.; Keçebaş, A. Thermodynamic Evaluation of a Waste Gas-Fired Steam Power Plant in an Iron and Steel Facility Using Enhanced Exergy Analysis. *Energy* **2019**, *169*, 684–695, doi:10.1016/j.energy.2018.12.007.
644. Yu, Y.; Li, B.; Wang, C.; Fang, Z.; Yang, X.; Tsukihashi, F. Evaluation and Synergy of Material and Energy in the Smelting Process of Ferrochrome Pellets in Steel Belt Sintering-Submerged Arc Furnace. *Energy* **2019**, *179*, 792–804, doi:10.1016/j.energy.2019.05.061.
645. Zhang, K.; Lau, H.C.; Liu, S.; Li, H. Carbon Capture and Storage in the Coastal Region of China between Shanghai and Hainan. *Energy* **2022**, *247*,



- doi:10.1016/j.energy.2022.123470.
646. Brutting, J.; Vandervaeren, C.; Senatore, G.; De Temmerman, N.; Fivet, C. Environmental Impact Minimization of Reticular Structures Made of Reused and New Elements through Life Cycle Assessment and Mixed -Integer Linear Programming. *Energy and Buildings* **2020**, *215*, doi:10.1016/j.enbuild.2020.109827.
647. Jayalath, A.; Navaratnam, S.; Ngo, T.; Mendis, P.; Hewson, N.; Aye, L. Life Cycle Performance of Cross Laminated Timber Mid-Rise Residential Buildings in Australia. *Energy and Buildings* **2020**, *223*, doi:10.1016/j.enbuild.2020.110091.
648. Piroozfar, P.; Pomponi, F.; El-Alem, F. Life Cycle Environmental Impact Assessment of Contemporary and Traditional Housing in Palestine. *Energy and Buildings* **2019**, *202*, doi:10.1016/j.enbuild.2019.109333.
649. Seike, T.; Isobe, T.; Hosaka, Y.; Kim, Y.; Watanabe, S.; Shimura, M. Design and Supply System for Emergency Temporary Housing by Various Construction Methods from the Perspective of Environmental Impact Assessment: The Case for the Great East Japan Earthquake. *Energy and Buildings* **2019**, *203*, doi:10.1016/j.enbuild.2019.109425.
650. Su, X.; Tian, S.; Shao, X.; Zhao, X. Embodied and Operational Energy and Carbon Emissions of Passive Building in HSCW Zone in China: A Case Study. *Energy and Buildings* **2020**, *222*, doi:10.1016/j.enbuild.2020.110090.
651. Zeitz, A.; Griffin, C.; Dusicka, P. Comparing the Embodied Carbon and Energy of a Mass Timber Structure System to Typical Steel and Concrete Alternatives for Parking Garages. *Energy and Buildings* **2019**, *199*, 126–133, doi:10.1016/j.enbuild.2019.06.047.
652. Zhao, Y.; Liu, L.; Wen, D.; Zhang, X.; Huan, C.; Zhang, B.; Wang, X. Recycling Waste Material for Backfill Coupled Heat Exchanger Systems in Underground Stopes of Mines. *Energy and Buildings* **2022**, *256*, doi:10.1016/j.enbuild.2021.111703.
653. Flores-Granobles, M.; Saeys, M. Minimizing CO<sub>2</sub> emissions with Renewable Energy: A Comparative Study of Emerging Technologies in the Steel Industry. *Energy and Environmental Science* **2020**, *13*, 1923–1932, doi:10.1039/d0ee00787k.
654. Ba-Shammakh, M.S. Cost Minimization with Optimal CO<sub>2</sub> Mitigation Options for the Steelmaking Industry. *Energy and Fuels* **2019**, doi:10.1021/acs.energyfuels.9b02544.
655. Dastgheib, S.A.; Mock, J.; Salih, H.H.; Patterson, C. Utilization of Water Utility Lime Sludge for Flue Gas Desulfurization in Coal-Fired Power Plants: Part III. Testing at a Higher Scale and Assessment of Selected Potential Operational Issues. *Energy and Fuels* **2019**, *33*, 11536–11543, doi:10.1021/acs.energyfuels.9b03132.
656. Li, Z.; Kang, W.; Zhao, Y.; Yang, H.; Li, M.; Kang, X.; Zhu, T.; Zhou, B.; Sarsenbekuly, B.; Aidarova, S. Organic Acid-Enhanced Viscoelastic Surfactant and Its Application in Fracturing Fluids. *Energy and Fuels* **2021**, *35*, 3130–3139, doi:10.1021/acs.energyfuels.0c04241.
657. Ma, M.; Li, C.; Li, Y.; Wang, C.; Gao, S.; Ye, H.; Li, J.; Yu, J. Resource Utilization of Spent Activated Coke as an Efficient Material for Simultaneous Removal of COS

- and H<sub>2</sub>S. *Energy and Fuels* **2022**, *36*, 4837–4846, doi:10.1021/acs.energyfuels.2c00325.
658. Marje, S.J.; Deshmukh, P.R.; Gunjekar, J.L.; Lokhande, C.D.; Patil, U.M. Strategically Tuned Ultrathin Nickel Phosphate Nanosheet Thin-Film Electrode as Cathode for High-Power Hybrid Supercapacitor Device. *Energy and Fuels* **2021**, *35*, 14110–14121, doi:10.1021/acs.energyfuels.1c01641.
659. Meißner, T.M.; Grégoire, B.; Montero, X.; Miller, E.; Maier, J.; Galetz, M.C. Long-Term Corrosion Behavior of Cr Diffusion Coatings on Ferritic-Martensitic Superheater Tube Material X20CrMoV12-1 under Conditions Mimicking Biomass (Co-)Firing. *Energy and Fuels* **2020**, *34*, 10989–11002, doi:10.1021/acs.energyfuels.0c01474.
660. Ozturk, M.; Dincer, I. Investigation of Hydrogen and Methane Production from Flue Gas Released from the Steel Industry. *Energy and Fuels* **2021**, *35*, 12718–12724, doi:10.1021/acs.energyfuels.1c00228.
661. Raj, G.; Larkin, E.; Lesimple, A.; Commins, P.; Whelan, J.; Naumov, P. In Situ Monitoring of the Inhibition of Asphaltene Adsorption by a Surfactant on Carbon Steel Surface. *Energy and Fuels* **2019**, *33*, 2030–2036, doi:10.1021/acs.energyfuels.8b04246.
662. Rezaei, R.; Moradi, G.; Sharifnia, S. Dry Reforming of Methane over Ni-Cu/Al<sub>2</sub>O<sub>3</sub> Catalyst Coatings in a Microchannel Reactor: Modeling and Optimization Using Design of Experiments. *Energy and Fuels* **2019**, *33*, 6689–6706, doi:10.1021/acs.energyfuels.9b00692.
663. Roshan Kumar, T.; Mattisson, T.; Rydén, M.; Stenberg, V. Process Analysis of Chemical Looping Gasification of Biomass for Fischer-Tropsch Crude Production with Net-Negative CO<sub>2</sub>Emissions: Part 1. *Energy and Fuels* **2022**, doi:10.1021/acs.energyfuels.2c00819.
664. Saravanakumar, T.; Sathiya Bama, S.; Selvaraju, T.; Sardhar Basha, S.J. Hexacyanoferrate-Complex-Derived NiFe<sub>2</sub>O<sub>4</sub>/CoFe<sub>2</sub>O<sub>4</sub>Heterostructure-MWCNTs for an Efficient Oxygen Evolution Reaction. *Energy and Fuels* **2021**, *35*, 5372–5382, doi:10.1021/acs.energyfuels.0c04224.
665. Störner, F.; Hildor, F.; Leion, H.; Zevenhoven, M.; Hupa, L.; Rydén, M. Potassium Ash Interactions with Oxygen Carriers Steel Converter Slag and Iron Mill Scale in Chemical-Looping Combustion of Biomass-Experimental Evaluation Using Model Compounds. *Energy and Fuels* **2020**, *34*, 2304–2314, doi:10.1021/acs.energyfuels.9b03616.
666. Wang, F.; Li, P.; Wang, G.; Mi, J. Moderate and Intense Low-Oxygen Dilution (MILD) Combustion of Liquid Fuels: A Review. *Energy and Fuels* **2022**, *36*, 8026–8053, doi:10.1021/acs.energyfuels.2c01383.
667. Ahlström, J.M.; Zetterholm, J.; Pettersson, K.; Harvey, S.; Wetterlund, E. Economic Potential for Substitution of Fossil Fuels with Liquefied Biomethane in Swedish Iron and Steel Industry – Synergy and Competition with Other Sectors. *Energy Conversion and Management* **2020**, *209*, doi:10.1016/j.enconman.2020.112641.

668. Carmona, L.G.; Whiting, K.; Carrasco, A.; Sousa, T. The Evolution of Resource Efficiency in the United Kingdom's Steel Sector: An Exergy Approach. *Energy Conversion and Management* **2019**, *196*, 891–905, doi:10.1016/j.enconman.2019.06.060.
669. Deng, L.; Adams II, T.A. Techno-Economic Analysis of Coke Oven Gas and Blast Furnace Gas to Methanol Process with Carbon Dioxide Capture and Utilization. *Energy Conversion and Management* **2020**, *204*, doi:10.1016/j.enconman.2019.112315.
670. Gao, R.; Zhang, C.; Kwak, G.; Lee, Y.-J.; Kang, S.C.; Guan, G. Techno-Economic Evaluation of Methanol Production Using by-Product Gases from Iron and Steel Works. *Energy Conversion and Management* **2020**, *213*, doi:10.1016/j.enconman.2020.112819.
671. Hos, T.; Herskowitz, M. Utilization of CO-Rich Waste Gases from the Steel Industry for Production of Renewable Liquid Fuels. *Energy Conversion and Management* **2021**, *240*, doi:10.1016/j.enconman.2021.114233.
672. Khallaghi, N.; Abbas, S.Z.; Manzolini, G.; De Coninck, E.; Spallina, V. Techno-Economic Assessment of Blast Furnace Gas Pre-Combustion Decarbonisation Integrated with the Power Generation. *Energy Conversion and Management* **2022**, *255*, doi:10.1016/j.enconman.2022.115252.
673. Kim, J.; Lee, H.; Lee, B.; Kim, J.; Oh, H.; Lee, I.-B.; Yoon, Y.-S.; Lim, H. An Integrative Process of Blast Furnace and SOEC for Hydrogen Utilization: Techno-Economic and Environmental Impact Assessment. *Energy Conversion and Management* **2021**, *250*, doi:10.1016/j.enconman.2021.114922.
674. Kim, S.; Kim, M.; Kim, Y.; Kwak, G.; Kim, J. Techno-Economic Evaluation of the Integrated Polygeneration System of Methanol, Power and Heat Production from Coke Oven Gas. *Energy Conversion and Management* **2019**, *182*, 240–250, doi:10.1016/j.enconman.2018.12.037.
675. Lee, J.; Shin, S.; Kwak, G.; Lee, M.; Lee, I.; Yoon, Y. Techno-Economic Evaluation of Polygeneration System for Olefins and Power by Using Steel-Mill off-Gases. *Energy Conversion and Management* **2020**, *224*, doi:10.1016/j.enconman.2020.113316.
676. Paul, S.; Chang, J. Design of Novel Electromagnetic Energy Harvester to Power a Deicing Robot and Monitoring Sensors for Transmission Lines. *Energy Conversion and Management* **2019**, *197*, doi:10.1016/j.enconman.2019.111868.
677. Rispoli, A.L.; Iaquaniello, G.; Salladini, A.; Verdone, N.; Pepe, M.R.; Borgogna, A.; Vilardi, G. Simultaneous Decarbonisation of Steel and Oil&Gas Industry by MSW Gasification: Economic and Environmental Analysis. *Energy Conversion and Management* **2021**, *245*, doi:10.1016/j.enconman.2021.114577.
678. Singh, V.; Buelens, L.C.; Poelman, H.; Saeys, M.; Marin, G.B.; Galvita, V.V. Decarbonisation of Steel Mill Gases in an Energy-Neutral Chemical Looping Process. *Energy Conversion and Management* **2022**, *254*, doi:10.1016/j.enconman.2022.115248.
679. Sun, W.; Wang, Q.; Zheng, Z.; Cai, J. Material–Energy–Emission Nexus in the Integrated Iron and Steel Industry. *Energy Conversion and Management* **2020**, *213*,

- doi:10.1016/j.enconman.2020.112828.
680. Wang, J.; Cao, Y.; Xiang, H.; Zhang, Z.; Liang, J.; Li, X.; Ding, D.; Li, T.; Tang, L. A Piezoelectric Smart Backing Ring for High-Performance Power Generation Subject to Train Induced Steel-Spring Fulcrum Forces. *Energy Conversion and Management* **2022**, *257*, doi:10.1016/j.enconman.2022.115442.
681. Wang, Y.; Yu, K.; Ling, X. Experimental and Modeling Study on Thermal Performance of Hydrated Salt Latent Heat Thermal Energy Storage System. *Energy Conversion and Management* **2019**, *198*, doi:10.1016/j.enconman.2019.111796.
682. Zhao, Y.; Zhao, Y.; Yi, Q.; Li, T.; Wang, J.; Bao, W.; Chang, L. Highly Flexible and Energy-Efficient Process for Converting Coke-Oven Gas and Pulverized Coke into Methanol and Ammonia Using Chemical Looping Technology. *Energy Conversion and Management* **2021**, *248*, doi:10.1016/j.enconman.2021.114796.
683. Bhaskar, A.; Assadi, M.; Somehsaraei, H.N. Can Methane Pyrolysis Based Hydrogen Production Lead to the Decarbonisation of Iron and Steel Industry? *Energy Conversion and Management: X* **2021**, *10*, doi:10.1016/j.ecmx.2021.100079.
684. Hamieh, A.; Rowaihy, F.; Al-Juaied, M.; Abo-Khatwa, A.N.; Afifi, A.M.; Hoteit, H. Quantification and Analysis of CO<sub>2</sub> Footprint from Industrial Facilities in Saudi Arabia. *Energy Conversion and Management: X* **2022**, *16*, doi:10.1016/j.ecmx.2022.100299.
685. Kishimoto, A.; McLellan, B.C.; Tezuka, T. Conceptual Design of the Steel Industry in 2050 Considering Collaboration with Local Communities. *Energy Conversion and Management: X* **2022**, *15*, doi:10.1016/j.ecmx.2022.100251.
686. Cludius, J.; de Bruyn, S.; Schumacher, K.; Vergeer, R. Ex-Post Investigation of Cost Pass-through in the EU ETS - an Analysis for Six Industry Sectors. *Energy Economics* **2020**, *91*, doi:10.1016/j.eneco.2020.104883.
687. Geng, W.; Fan, Y. An Imperfectly Competitive Permit Market under a Rate-Based Scheme. *Energy Economics* **2022**, *105*, doi:10.1016/j.eneco.2021.105702.
688. Hertwich, E.G. Carbon Fueling Complex Global Value Chains Tripled in the Period 1995–2012. *Energy Economics* **2020**, *86*, doi:10.1016/j.eneco.2019.104651.
689. Paltsev, S.; Gurgel, A.; Morris, J.; Chen, H.; Dey, S.; Marwah, S. Economic Analysis of the Hard-to-Abate Sectors in India. *Energy Economics* **2022**, *112*, doi:10.1016/j.eneco.2022.106149.
690. Wang, D.; Chen, F.; Mao, J.; Liu, N.; Rong, F. Are the Official National Data Credible? Empirical Evidence from Statistics Quality Evaluation of China's Coal and Its Downstream Industries. *Energy Economics* **2022**, *114*, doi:10.1016/j.eneco.2022.106310.
691. Winchester, N.; Reilly, J.M. The Economic and Emissions Benefits of Engineered Wood Products in a Low-Carbon Future. *Energy Economics* **2020**, *85*, doi:10.1016/j.eneco.2019.104596.
692. Xian, Y.; Yu, D.; Wang, K.; Yu, J.; Huang, Z. Capturing the Least Costly Measure of CO<sub>2</sub> Emission Abatement: Evidence from the Iron and Steel Industry in China. *Energy Economics* **2022**, *106*, doi:10.1016/j.eneco.2022.105812.

693. Zhang, Y.-J.; Wang, W. How Does China's Carbon Emissions Trading (CET) Policy Affect the Investment of CET-Covered Enterprises? *Energy Economics* **2021**, *98*, doi:10.1016/j.eneco.2021.105224.
694. He, Y.; Liao, N.; Rao, J.; Chen, Z. Energy Conservation Path of China Iron and Steel Industry Driven by Relative Policies. *Energy Efficiency* **2021**, *14*, doi:10.1007/s12053-020-09925-w.
695. Talaei, A.; Ahiduzzaman, M.; Davis, M.; Gemechu, E.; Kumar, A. Potential for Energy Efficiency Improvement and Greenhouse Gas Mitigation in Canada's Iron and Steel Industry. *Energy Efficiency* **2020**, *13*, 1213–1243, doi:10.1007/s12053-020-09878-0.
696. Yue, H.; Worrell, E.; Crijns-Graus, W.; Liu, W.; Zhang, S. Saving Energy in China's Industry with a Focus on Electricity: A Review of Opportunities, Potentials and Environmental Benefits. *Energy Efficiency* **2021**, *14*, doi:10.1007/s12053-021-09979-4.
697. Chen, Y.; Long, X.; Salman, M. Did the 2014 Nanjing Youth Olympic Games Enhance Environmental Efficiency? New Evidence from a Quasi-Natural Experiment. *Energy Policy* **2021**, *159*, doi:10.1016/j.enpol.2021.112581.
698. Davies, A.J.; Hastings, A. Quantifying Greenhouse Gas Emissions from Decommissioned Oil and Gas Steel Structures: Can Current Policy Meet NetZero Goals? *Energy Policy* **2022**, *160*, doi:10.1016/j.enpol.2021.112717.
699. Dhar, S.; Pathak, M.; Shukla, P.R. Transformation of India's Steel and Cement Industry in a Sustainable 1.5 °C World. *Energy Policy* **2020**, *137*, doi:10.1016/j.enpol.2019.111104.
700. Liu, N.; Ma, Z.; Kang, J.; Su, B. A Multi-Region Multi-Sector Decomposition and Attribution Analysis of Aggregate Carbon Intensity in China from 2000 to 2015. *Energy Policy* **2019**, *129*, 410–421, doi:10.1016/j.enpol.2019.02.015.
701. Liu, Y.; Zhang, C.; Xu, X.; Ge, Y.; Ren, G. Assessment of Energy Conservation Potential and Cost in Open-Pit Metal Mines: Bottom-up Approach Integrated Energy Conservation Supply Curve and Ultimate Pit Limit. *Energy Policy* **2022**, *163*, doi:10.1016/j.enpol.2022.112809.
702. Richardson-Barlow, C.; Pimm, A.J.; Taylor, P.G.; Gale, W.F. Policy and Pricing Barriers to Steel Industry Decarbonisation: A UK Case Study. *Energy Policy* **2022**, *168*, doi:10.1016/j.enpol.2022.113100.
703. Venkataraman, M.; Csereklyei, Z.; Aisbett, E.; Rahbari, A.; Jotzo, F.; Lord, M.; Pye, J. Zero-Carbon Steel Production: The Opportunities and Role for Australia. *Energy Policy* **2022**, *163*, doi:10.1016/j.enpol.2022.112811.
704. Zhu, C.; Li, X.; Zhu, W.; Gong, W. Embodied Carbon Emissions and Mitigation Potential in China's Building Sector: An Outlook to 2060. *Energy Policy* **2022**, *170*, doi:10.1016/j.enpol.2022.113222.
705. Cunha, A.F.; Caetano, N.S.; Ramalho, E.; Crispim, A. Fat Extraction from Fleshings - Optimization of Operating Conditions. *Energy Reports* **2020**, *6*, 381–390, doi:10.1016/j.egy.2020.11.176.

706. Gonçalves, M.; Monteiro, H.; Iten, M. Life Cycle Assessment Studies on Lightweight Materials for Automotive Applications - An Overview. *Energy Reports* **2022**, *8*, 338–345, doi:10.1016/j.egyr.2022.01.067.
707. Hu, Z.; Zheng, Z.; Hu, K.; Li, C.; Yang, Y. The Dynamic Evaluation and Optimization Model for Steel Enterprise's Energy Flow Network Operations. *Energy Reports* **2022**, *8*, 2151–2162, doi:10.1016/j.egyr.2022.01.079.
708. Iten, M.; Fernandes, U.; Oliveira, M.C. Framework to Assess Eco-Efficiency Improvement: Case Study of a Meat Production Industry. *Energy Reports* **2021**, *7*, 7134–7148, doi:10.1016/j.egyr.2021.09.120.
709. Lyu, F.; Shao, H.; Zhang, W. Comparative Analysis about Carbon Emission of Precast Pile and Cast-in-Situ Pile. *Energy Reports* **2022**, *8*, 514–525, doi:10.1016/j.egyr.2022.03.101.
710. Mu, J.; He, H.; Song, J.; He, J.; Hou, X.; Han, X.; Feng, C.; Zou, J.; Yu, J.; Chou, X. Functional Structure Enhanced Synergistic Sensing from Triboelectric-Electromagnetic Hybrid Nanogenerator for Self-Powered Rotating Speed Monitoring. *Energy Reports* **2022**, *8*, 5272–5283, doi:10.1016/j.egyr.2022.03.208.
711. Mujtaba, M.A.; Muk Cho, H.; Masjuki, H.H.; Kalam, M.A.; Farooq, M.; Soudagar, M.E.M.; Gul, M.; Ahmed, W.; Afzal, A.; Bashir, S.; et al. Effect of Alcoholic and Nano-Particles Additives on Tribological Properties of Diesel-Palm-Sesame-Biodiesel Blends. *Energy Reports* **2021**, *7*, 1162–1171, doi:10.1016/j.egyr.2020.12.009.
712. Skarova, A.; Harkness, J.; Keillor, M.; Milne, D.; Powrie, W. Review of Factors Affecting Stress-Free Temperature in the Continuous Welded Rail Track. *Energy Reports* **2022**, *8*, 769–775, doi:10.1016/j.egyr.2022.05.046.
713. Wu, J. Sustainable Development of Green Reverse Logistics Based on Blockchain. *Energy Reports* **2022**, *8*, 11547–11553, doi:10.1016/j.egyr.2022.08.219.
714. Zhang, J.; Li, F.; Liu, S.; Wu, W.-D.; Yu, X. Early Age Cracking Potential of Inner Lining of Coal Mine Frozen Shaft. *Energy Reports* **2022**, *8*, 16–24, doi:10.1016/j.egyr.2022.01.132.
715. Zhou, Y.; Zhu, R.; Wei, G. Recent Advancements in Source Reduction and Recycling Technologies for Converter Dust. *Energy Reports* **2022**, *8*, 7274–7285, doi:10.1016/j.egyr.2022.05.234.
716. Broecks, K.; Jack, C.; ter Mors, E.; Boomsma, C.; Shackley, S. How Do People Perceive Carbon Capture and Storage for Industrial Processes? Examining Factors Underlying Public Opinion in the Netherlands and the United Kingdom. *Energy Research and Social Science* **2021**, *81*, doi:10.1016/j.erss.2021.102236.
717. Griffiths, S.; Sovacool, B.K.; Kim, J.; Bazilian, M.; Uratani, J.M. Industrial Decarbonization via Hydrogen: A Critical and Systematic Review of Developments, Socio-Technical Systems and Policy Options. *Energy Research and Social Science* **2021**, *80*, doi:10.1016/j.erss.2021.102208.
718. Kim, J.; Sovacool, B.K.; Bazilian, M.; Griffiths, S.; Lee, J.; Yang, M.; Lee, J. Decarbonizing the Iron and Steel Industry: A Systematic Review of Sociotechnical Systems, Technological Innovations, and Policy Options. *Energy Research and*

- Social Science* **2022**, *89*, doi:10.1016/j.erss.2022.102565.
719. Öhman, A.; Karakaya, E.; Urban, F. Enabling the Transition to a Fossil-Free Steel Sector: The Conditions for Technology Transfer for Hydrogen-Based Steelmaking in Europe. *Energy Research and Social Science* **2022**, *84*, doi:10.1016/j.erss.2021.102384.
720. Swennenhuis, F.; de Gooyert, V.; de Coninck, H. Towards a CO<sub>2</sub>-Neutral Steel Industry: Justice Aspects of CO<sub>2</sub> Capture and Storage, Biomass- and Green Hydrogen-Based Emission Reductions. *Energy Research and Social Science* **2022**, *88*, doi:10.1016/j.erss.2022.102598.
721. Li, S.; Zhang, K.; Wang, Q. Experimental Study on the Corrosion of a Downhole String under Flue Gas Injection Conditions. *Energy Science and Engineering* **2019**, *7*, 2620–2632, doi:10.1002/ese3.448.
722. Hoang, A.; Tabatabaei, M.; Aghbashlo, M. A Review of the Effect of Biodiesel on the Corrosion Behavior of Metals/Alloys in Diesel Engines. *Energy Sources, Part A: Recovery Utilization and Environmental Effects* **2020**, *42*, 2923–2943, doi:10.1080/15567036.2019.1623346.
723. Amirkalaei, M.H.; Ahmadi-Danesh-Ashtiani, H.; Khoshgard, A.; Fazaeli, R. Designing an Active Solar Water Desalination System by Considering Weather Conditions and Economic Factors. *Energy Sources, Part A: Recovery, Utilization and Environmental Effects* **2020**, doi:10.1080/15567036.2020.1826012.
724. Das, D.; Anand, A.; Gautam, S. Effect of Rice Husk Volatiles in Iron Ore Reduction and Its Kinetic Study. *Energy Sources, Part A: Recovery, Utilization and Environmental Effects* **2022**, *44*, 6321–6333, doi:10.1080/15567036.2022.2098417.
725. Inceoglu, D.N.; Özbay, İ.; Karademir, A. VOC and PAH Characterization of Petroleum Coke at Maximum Thermal Decomposition Temperature. *Energy Sources, Part A: Recovery, Utilization and Environmental Effects* **2019**, *41*, 1305–1314, doi:10.1080/15567036.2018.1548509.
726. Shi, B.; Zhao, X.; Zhang, J.; Jin, Y.; Liu, D.; Yan, S.; Ge, Y.; Hao, J. Preparation and Performance Characterization of Steel Slag-Based Thermal Storage Composites for Waste Recycling and Thermal Energy Storage. *Energy Sources, Part A: Recovery, Utilization and Environmental Effects* **2022**, *44*, 8221–8234, doi:10.1080/15567036.2022.2120933.
727. Zhang, Q.; Zhao, T.; Ni, T.; Gao, J. Optimization Models for Operation of a Steam Power System in Integrated Iron and Steel Works. *Energy Sources, Part A: Recovery, Utilization and Environmental Effects* **2021**, *43*, 1100–1114, doi:10.1080/15567036.2019.1635230.
728. Islas-Samperio, J.; Birlain-Escalante, M.; Grande-Acosta, G. Toward a Low-Carbon Industrial Sector in Mexico. *Energy Sources, Part B: Economics Planning and Policy* **2020**, *15*, 545–571, doi:10.1080/15567249.2020.1753855.
729. Li, H.; Zhang, X.; Zhao, Z.; Hu, Z.; Liu, X.; Yu, G. Flexible Sodium-Ion Based Energy Storage Devices: Recent Progress and Challenges. *Energy Storage Materials* **2020**, *26*, 83–104, doi:10.1016/j.ensm.2019.12.037.

730. Cervantes Barron, K.; Hakker, M.E.; Cullen, J.M. Material Requirements for Future Low-Carbon Electricity Projections in Africa. *Energy Strategy Reviews* **2022**, *44*, doi:10.1016/j.esr.2022.100890.
731. Jeon, S.; Roh, M.; Kim, S. The Derivation of Sectoral and Provincial Implications from Power Sector Scenarios Using an Integrated Assessment Model at Korean Provincial Level: GCAM-Korea. *Energy Strategy Reviews* **2021**, *38*, doi:10.1016/j.esr.2021.100694.
732. Kullmann, F.; Markewitz, P.; Stolten, D.; Robinius, M. Combining the Worlds of Energy Systems and Material Flow Analysis: A Review. *Energy Sustainability and Society* **2021**, *11*, doi:10.1186/s13705-021-00289-2.
733. Adalati, R.; Kumar, A.; Kumar, Y.; Chandra, R. A High-Performing Asymmetric Supercapacitor of Molybdenum Nitride and Vanadium Nitride Thin Films as Binder-Free Electrode Grown through Reactive Sputtering. *Energy Technology* **2020**, *8*, doi:10.1002/ente.202000466.
734. de Carvalho, C.B.; Pereira, E.L.; Dos Santos, A.B. Contaminant Mobility in Sandy Soils after Application of Treated Wastewater Produced in the Steel Industry. *Engenharia Sanitaria e Ambiental* **2021**, *26*, 819–828, doi:10.1590/S1413-415220200339.
735. Leopoldino, C.C.L.; Barbosa, D.C.; de Mendonça, F.M.; Infante, C.E.D.C.; Nogueira, E.A.T. Environmental and Financial Impacts of the Implementation of Solid Waste Management in a Steel Complex: A Case Study. *Engenharia Sanitaria e Ambiental* **2019**, *24*, 1239–1250, doi:10.1590/s1413-41522019185146.
736. Moresco, M.A.; Falchi, P.P.; da Silva Ferreira, E.; Silva, D.C.; Barreto-Rodrigues, M. Application of Steel Waste for 2,4-Dinitrophenol Degradation through Fenton Type Advanced Oxidation System. *Engenharia Sanitaria e Ambiental* **2021**, *26*, 201–210, doi:10.1590/s1413-415220190251.
737. Valadão, L.; Duarte, C.; Andrade, G.; de los Santos, D.; Filho, P.S. Comparative Study of Bio-Oils Obtained by Fast and Slow Pyrolysis of Peach Stone. *Engenharia Sanitaria e Ambiental* **2021**, *26*, 757–764, doi:10.1590/S1413-415220200077.
738. Lam, D.; Dai, X.; Sheehan, T. Testing of a Full-Scale Composite Floor Plate. *Engineering* **2019**, *5*, 223–233, doi:10.1016/j.eng.2018.11.021.
739. Lin, Q.; Zhang, X.; Wang, T.; Zheng, C.; Gao, X. Technical Perspective of Carbon Capture, Utilization, and Storage. *Engineering* **2022**, *14*, 27–32, doi:10.1016/j.eng.2021.12.013.
740. Kleine, D.; Chodorski, J.; Mitra, S.; Schlegel, C.; Huttenlochner, K.; Müller-Renno, C.; Mukherjee, J.; Ziegler, C.; Ulber, R. Monitoring of Biofilms Grown on Differentially Structured Metallic Surfaces Using Confocal Laser Scanning Microscopy. *Engineering in Life Sciences* **2019**, *19*, 513–521, doi:10.1002/elsc.201800176.
741. Al-Zboon, K.K.; Forton, O.T. Indoor Air Quality in Steel Rolling Industries and Possible Health Effects. *Environment and Natural Resources Journal* **2019**, *17*, 20–29, doi:10.32526/enrj.17.4.2019.28.



742. Wihardjaka, A.; Harsanti, E.S.; Pramono, A.; Sutriadi, M.T. Reducing Production of Co<sub>2</sub> and Ch<sub>4</sub> from Peaty Paddy Soils through Applying Slag in South Sumatera, Indonesia. *Environment and Natural Resources Journal* **2021**, *19*, 132–140, doi:10.32526/enrj/19/2020138.
743. Abrams, J.; Klein, M.; Henneman, L.; Sarnat, S.; Chang, H.; Strickland, M.; Mulholland, J.; Russell, A.; Tolbert, P. Impact of Air Pollution Control Policies on Cardiorespiratory Emergency Department Visits, Atlanta, GA, 1999–2013. *Environment International* **2019**, *126*, 627–634, doi:10.1016/j.envint.2019.01.052.
744. Antoniadis, V.; Golia, E.E.; Liu, Y.-T.; Wang, S.-L.; Shaheen, S.M.; Rinklebe, J. Soil and Maize Contamination by Trace Elements and Associated Health Risk Assessment in the Industrial Area of Volos, Greece. *Environment International* **2019**, *124*, 79–88, doi:10.1016/j.envint.2018.12.053.
745. Bello, A.; Xue, Y.; Bello, D. Urinary Biomonitoring of Occupational Exposures to Bisphenol A Diglycidyl Ether (BADGE) – Based Epoxy Resins among Construction Painters in Metal Structure Coating. *Environment International* **2021**, *156*, doi:10.1016/j.envint.2021.106632.
746. Dietrich, M.; Wolfe, A.; Burke, M.; Krekeler, M.P.S. The First Pollution Investigation of Road Sediment in Gary, Indiana: Anthropogenic Metals and Possible Health Implications for a Socioeconomically Disadvantaged Area. *Environment International* **2019**, *128*, 175–192, doi:10.1016/j.envint.2019.04.042.
747. Jitaru, P.; Ingenbleek, L.; Marchond, N.; Laurent, C.; Adegboye, A.; Hossou, S.E.; Koné, A.Z.; Oyedele, A.D.; Kisito, C.S.K.J.; Dembélé, Y.K.; et al. Occurrence of 30 Trace Elements in Foods from a Multi-Centre Sub-Saharan Africa Total Diet Study: Focus on Al, As, Cd, Hg, and Pb. *Environment International* **2019**, *133*, doi:10.1016/j.envint.2019.105197.
748. Leogrande, S.; Alessandrini, E.R.; Stafoggia, M.; Morabito, A.; Nocioni, A.; Ancona, C.; Bisceglia, L.; Mataloni, F.; Giua, R.; Mincuzzi, A.; et al. Industrial Air Pollution and Mortality in the Taranto Area, Southern Italy: A Difference-in-Differences Approach. *Environment International* **2019**, *132*, doi:10.1016/j.envint.2019.105030.
749. Paulillo, A.; Striolo, A.; Lettieri, P. The Environmental Impacts and the Carbon Intensity of Geothermal Energy: A Case Study on the Hellisheiði Plant. *Environment International* **2019**, *133*, doi:10.1016/j.envint.2019.105226.
750. Salthammer, T.; Gu, J.; Wientzek, S.; Harrington, R.; Thomann, S. Measurement and Evaluation of Gaseous and Particulate Emissions from Burning Scented and Unscented Candles. *Environment International* **2021**, *155*, doi:10.1016/j.envint.2021.106590.
751. Wang, J.; Wang, L.; Wang, Y.; Tsang, D.C.W.; Yang, X.; Beiyuan, J.; Yin, M.; Xiao, T.; Jiang, Y.; Lin, W.; et al. Emerging Risks of Toxic Metal(Loid)s in Soil-Vegetables Influenced by Steel-Making Activities and Isotopic Source Apportionment. *Environment International* **2021**, *146*, doi:10.1016/j.envint.2020.106207.
752. Yuan, Q.; Rowden, G.; Wolf, T.M.; Schwabenlander, M.D.; Larsen, P.A.; Bartelt-

- Hunt, S.L.; Bartz, J.C. Sensitive Detection of Chronic Wasting Disease Prions Recovered from Environmentally Relevant Surfaces. *Environment International* **2022**, *166*, doi:10.1016/j.envint.2022.107347.
753. Alhilli, H.K.; Burhan, A.M. Developing a System for Assessing the Sustainability in School Building Projects. *Environment, Development and Sustainability* **2021**, *23*, 17483–17502, doi:10.1007/s10668-021-01397-x.
754. Basu, S.; Roy, M.; Pal, P. Corporate Greening in a Large Developing Economy: Pollution Prevention Strategies. *Environment, Development and Sustainability* **2019**, *21*, 1603–1633, doi:10.1007/s10668-018-0121-3.
755. Brondani, M.; de Oliveira, J.S.; Mayer, F.D.; Hoffmann, R. Life Cycle Assessment of Distillation Columns Manufacturing. *Environment, Development and Sustainability* **2020**, *22*, 5925–5945, doi:10.1007/s10668-019-00459-5.
756. Ding, S.; Zhao, J.; Zhang, M.; Yang, S.; Zhang, H. Measuring the Environmental Protection Efficiency and Productivity of the 49 Largest Iron and Steel Enterprises in China. *Environment, Development and Sustainability* **2022**, *24*, 454–472, doi:10.1007/s10668-021-01448-3.
757. Guo, J.; Tan, X.; Meng, X.; Li, Y. Clean Technology Investment Considering Synergistic Effects: A Case from the Steel Sintering Process. *Environment, Development and Sustainability* **2022**, doi:10.1007/s10668-021-02009-4.
758. Juntueng, S.; Towprayoon, S.; Chiarakorn, S. Assessment of Energy Saving Potential and CO<sub>2</sub> Abatement Cost Curve in 2030 for Steel Industry in Thailand. *Environment, Development and Sustainability* **2021**, *23*, 2630–2654, doi:10.1007/s10668-020-00691-4.
759. Phuluwa, H.S.; Daniyan, I.; Mpofu, K. Development of a Sustainable Decision Framework for the Implementation of End-of-Life (EoL) Options for the Railcar Industry. *Environment, Development and Sustainability* **2021**, *23*, 9433–9453, doi:10.1007/s10668-020-01035-y.
760. Xu, M.; Qin, Z.; Wei, Y. Exploring the Financing and Allocating Schemes for the Chinese Green Climate Fund. *Environment, Development and Sustainability* **2022**, doi:10.1007/s10668-022-02137-5.
761. Yue, Q.; Chai, X.; Zhang, Y.; Wang, Q.; Wang, H.; Zhao, F.; Ji, W.; Lu, Y. Analysis of Iron and Steel Production Paths on the Energy Demand and Carbon Emission in China's Iron and Steel Industry. *Environment, Development and Sustainability* **2022**, doi:10.1007/s10668-022-02234-5.
762. Zhang, X.; Yang, H.; Sun, R.; Cui, M.; Sun, N.; Zhang, S. Evaluation and Analysis of Heavy Metals in Iron and Steel Industrial Area. *Environment, Development and Sustainability* **2022**, *24*, 10997–11010, doi:10.1007/s10668-021-01893-0.
763. Lau, L.L.; Strezov, V.; Gonçalves, M.V.B.; Bagatini, M.C. Trace Elements Emission in Iron Ore Sintering: A Review. *Environmental Advances* **2021**, *6*, doi:10.1016/j.envadv.2021.100123.
764. Li, H.; Guo, R.; Chen, Y.; Yang, G.; Wu, T. Utilization of Steel Slag as a Highly Efficient Absorbent for SO<sub>2</sub> Removal at Coal-Fired Power Stations. *Environmental*

- Advances* **2022**, *9*, doi:10.1016/j.envadv.2022.100276.
765. Pryce, D.; Memon, F.A.; Kapelan, Z. Life Cycle Analysis Approach to Comparing Environmental Impacts of Alternative Materials Used in the Construction of Small Wastewater Treatment Plants. *Environmental Advances* **2021**, *4*, doi:10.1016/j.envadv.2021.100065.
766. Taiwo, A.M.; Musa, M.O.; Oguntoke, O.; Afolabi, T.A.; Sadiq, A.Y.; Akanji, M.A.; Shehu, M.R. Spatial Distribution, Pollution Index, Receptor Modelling and Health Risk Assessment of Metals in Road Dust from Lagos Metropolis, Southwestern Nigeria. *Environmental Advances* **2020**, *2*, doi:10.1016/j.envadv.2020.100012.
767. Turgel, I.; Bozhko, L.; Bazhenov, O. The Evaluation Methodology for the Ecological and Economic Potential of the Metallurgical Cluster. *Environmental and Climate Technologies* **2020**, *24*, 501–515, doi:10.2478/rtuct-2020-0031.
768. Chang, L.; Zou, T. Spatio-Temporal Analysis of Air Pollution in North China Plain. *Environmental and Ecological Statistics* **2022**, *29*, 271–293, doi:10.1007/s10651-021-00521-4.
769. Alias, C.; Feretti, D.; Benassi, L.; Abbà, A.; Gelatti, U.; Sorlini, S.; Zerbini, I.; Piovani, G. The Release of Contaminants from Steel Slags and Natural Aggregates: Evaluation of Toxicity and Genotoxicity. *Environmental and Molecular Mutagenesis* **2021**, *62*, 66–77, doi:10.1002/em.22407.
770. Ntombela, S.M.; Bohlmann, H.R.; Kalaba, M.W. Greening the South Africa's Economy Could Benefit the Food Sector: Evidence from a Carbon Tax Policy Assessment. *Environmental and Resource Economics* **2019**, *74*, 891–910, doi:10.1007/s10640-019-00352-9.
771. Janjua, S.Y.; Sarker, P.K.; Biswas, W.K. Sustainability Implications of Service Life on Residential Buildings – An Application of Life Cycle Sustainability Assessment Framework. *Environmental and Sustainability Indicators* **2021**, *10*, doi:10.1016/j.indic.2021.100109.
772. Ncube, A.; Cocker, J.; Ellis, D.; Fiorentino, G. Biogas from Source Separated Organic Waste within a Circular and Life Cycle Perspective. A Case Study in Ontario, Canada. *Environmental and Sustainability Indicators* **2021**, *11*, doi:10.1016/j.indic.2021.100134.
773. Akkalatham, W.; Taghipour, A. Pro-Environmental Behavior Model Creating Circular Economy in Steel Recycling Market, Empirical Study in Thailand. *Environmental Challenges* **2021**, *4*, doi:10.1016/j.envc.2021.100112.
774. Lin, Z.; Ji, Y.; Guo, J.; Lin, Y.; Zhao, J.; Ma, Y. Characteristics and Sources of Elements in PM<sub>2.5</sub> during Spring in Jinzhou. *Environmental Chemistry* **2021**, *40*, 3474–3481, doi:10.7524/j.issn.0254-6108.2020071003.
775. Xu, X.; Feng, X.; Chen, J.; Yin, H.; Qian, J. Pollution Characteristic and Health Risk Assessment of Metal Elements in PM<sub>2.5</sub> of Panzhihua City. *Environmental Chemistry* **2021**, *40*, 2767–2775, doi:10.7524/j.issn.0254-6108.2020052702.
776. Ho, H.-J.; Iizuka, A.; Lee, C.-H.; Chen, W.-S. Mineral Carbonation Using Alkaline Waste and Byproducts to Reduce CO<sub>2</sub> Emissions in Taiwan. *Environmental*

- Chemistry Letters* **2022**, doi:10.1007/s10311-022-01518-6.
777. Peng, H.; Guo, J. Removal of Chromium from Wastewater by Membrane Filtration, Chemical Precipitation, Ion Exchange, Adsorption Electrocoagulation, Electrochemical Reduction, Electrodialysis, Electrodeionization, Photocatalysis and Nanotechnology: A Review. *Environmental Chemistry Letters* **2020**, *18*, 2055–2068, doi:10.1007/s10311-020-01058-x.
778. Yang, Q.; Yang, L.; Shen, X.; Zheng, M.; Liu, G. Organic Pollutants from Electric Arc Furnaces in Steelmaking: A Review. *Environmental Chemistry Letters* **2021**, *19*, 1509–1523, doi:10.1007/s10311-020-01128-0.
779. Rodrigues, B.; Carmona, L.G.; Whiting, K.; Sousa, T. Resource Efficiency for UK Cars from 1960 to 2015: From Stocks and Flows to Service Provision. *Environmental Development* **2022**, *41*, doi:10.1016/j.envdev.2021.100676.
780. Hu, J.; Li, S.; Shi, S.; Zhang, J.; Xian, G. Development and Application of a Model Test System for Rockfall Disaster Study on Tunnel Heading Slope. *Environmental Earth Sciences* **2019**, *78*, doi:10.1007/s12665-019-8379-9.
781. Jones, B.G.; Alyazichi, Y.M.; Low, C.; Goodfellow, A.; Chenhall, B.E.; Morrison, R.J. Distribution and Sources of Trace Element Pollutants in the Sediments of the Industrialised Port Kembla Harbour, New South Wales, Australia. *Environmental Earth Sciences* **2019**, *78*, doi:10.1007/s12665-019-8358-1.
782. Lian, X.; Dai, H.; Ge, L.; Cai, Y. Assessment of a House Affected by Ground Movement Using Terrestrial Laser Scanning and Numerical Modeling. *Environmental Earth Sciences* **2020**, *79*, doi:10.1007/s12665-020-08929-0.
783. Moosavian, S.M.; Karbassi, A.; Sabzalipour, S.; Amirnezhad, R.; Daneshian, J. Determination of Sedimentation Rate of Hoor-Al-Azim Wetland by Carbon-14 Method and Analysis of Its Past Climate Using Element Geochemistry. *Environmental Earth Sciences* **2019**, *78*, doi:10.1007/s12665-019-8666-5.
784. Ogundele, L.T.; Oluwajana, O.A.; Oguntimehin, A.C.; Inuyomi, S.O. Heavy Metals, Radionuclides Activity and Mineralogy of Soil Samples from an Artisanal Gold Mining Site in Ile-Ife, Nigeria: Implications on Human and Environmental Health. *Environmental Earth Sciences* **2021**, *80*, doi:10.1007/s12665-021-09494-w.
785. Branca, T.A.; Fornai, B.; Colla, V.; Pistocchi, C.; Ragaglini, G. Application of Basic Oxygen Furnace (BOFS) in Agriculture: A Study on the Economic Viability and Effects on the Soil. *Environmental Engineering and Management Journal* **2019**, *18*, 1231–1244, doi:10.30638/eemj.2019.118.
786. Feiber, S.D.; de Souza, T.C.; Bressiani, L.; Balestra, C.E.T. Analysis of CO<sub>2</sub> Emissions between Construction Systems: Light Steel Frame and Conventional Masonry. *Environmental Engineering and Management Journal* **2021**, *19*, 2147–2156.
787. Lasso, J.G.; Branco, D.C.; Magrini, A. Assessing the Greenhouse Gas Emissions of Buildings in Brazil: A Case Study of a Housing Complex. *Environmental Engineering and Management Journal* **2021**, *20*, 1225–1236, doi:10.30638/eemj.2021.114.
788. Masilamani, A.; Durairaj, N.; Ramalingam, M. A NOVEL WAY TO EXPLOIT

- STEEL INDUSTRY WASTE: MICROBIAL MINERALIZED SLAG BLOCKS. *Environmental Engineering and Management Journal* **2021**, *20*, 1455–1465.
789. You, Y.; Cheong, C.B. METHODS FOR TREATING CONSTRUCTION WASTE AS RESOURCES FROM A SUSTAINABLE DEVELOPMENT PERSPECTIVE. *Environmental Engineering and Management Journal* **2022**, *21*, 181–189.
790. Zhang, J.; Chen, G.; Ma, Y.; Xu, M.; Qin, S.; Liu, X.; Feng, H.; Hou, L. Purification of Pickling Wastewater from the Steel Industry Using Membrane Filters: Performance and Membrane Fouling. *Environmental Engineering Research* **2022**, *27*, doi:10.4491/eer.2020.486.
791. Burger Mansilha, M.; Brondani, M.; Farret, F.A.; Cantorski Da Rosa, L.; Hoffmann, R. Life Cycle Assessment of Electrical Distribution Transformers: Comparative Study between Aluminum and Copper Coils. *Environmental Engineering Science* **2019**, *36*, 114–135, doi:10.1089/ees.2018.0256.
792. Chen, Y.; Ding, Z.; Liu, J. Life Cycle Assessment of Environmental Emissions and Scenario Simulation of an Automotive Power Seat Considering Scrap Recycling. *Environmental Engineering Science* **2019**, *36*, 1349–1363, doi:10.1089/ees.2018.0507.
793. Li, Q.; Chen, X.; Wang, Y.; Wei, X.; Wang, S.; Sun, X. Anoxic-Oxic+subsurface Flow Constructed Wetland+surface Flow Constructed Wetland Combined Process Optimizes Urban Secondary Effluent N/P to Cultivate Nontoxic Green Algae. *Environmental Engineering Science* **2020**, *37*, 548–559, doi:10.1089/ees.2019.0359.
794. Madikizela, L.M.; Chimuka, L.; Ncube, S. Metal Pollution Source Apportionment in Two Important Rivers of Eastern Cape Province, South Africa: A Case Study of Bizana and Mthatha Rivers. *Environmental Forensics* **2021**, doi:10.1080/15275922.2021.1940382.
795. Agyeman, P.C.; John, K.; Kebonye, N.M.; Borůvka, L.; Vašát, R. Combination of Enrichment Factor and Positive Matrix Factorization in the Estimation of Potentially Toxic Element Source Distribution in Agricultural Soil. *Environmental Geochemistry and Health* **2022**, doi:10.1007/s10653-022-01348-z.
796. Cho, I.-G.; Park, M.-K.; Cho, H.-K.; Jeon, J.-W.; Lee, S.-E.; Choi, S.-D. Characteristics of Metal Contamination in Paddy Soils from Three Industrial Cities in South Korea. *Environmental Geochemistry and Health* **2019**, *41*, 1895–1907, doi:10.1007/s10653-019-00246-1.
797. Hada, S.; Moriguchi, S.; Akashi, Y.; Katoh, M. Suppression of Arsenic Release from Alkaline Excavated Rock by Calcium Dissolved from Steel Slag. *Environmental Geochemistry and Health* **2020**, *42*, 3983–3993, doi:10.1007/s10653-020-00657-5.
798. Hatami Manesh, M.; Haghshenas, A.; Mirzaei, M.; Azadi, H.; Marofi, S. Seasonal Variations of Polycyclic Aromatic Hydrocarbons in Coastal Sediments of a Marine Resource Hot Spot: The Case of Pars Special Economic Energy Zone, Iran. *Environmental Geochemistry and Health* **2021**, *43*, 3897–3919, doi:10.1007/s10653-021-00863-9.
799. Mandal, R.; Kaur, S.; Gupta, V.; Joshi, A. Heavy Metals Controlling Cardiovascular Diseases Risk Factors in Myocardial Infarction Patients in

- Critically Environmentally Heavy Metal-Polluted Steel Industrial Town Mandi-Gobindgarh (India). *Environmental Geochemistry and Health* **2022**, *44*, 3215–3238, doi:10.1007/s10653-021-01068-w.
800. Najmeddin, A.; Keshavarzi, B. Health Risk Assessment and Source Apportionment of Polycyclic Aromatic Hydrocarbons Associated with PM10 and Road Deposited Dust in Ahvaz Metropolis of Iran. *Environmental Geochemistry and Health* **2019**, *41*, 1267–1290, doi:10.1007/s10653-018-0209-6.
801. Panda, G.; Pobi, K.K.; Gangopadhyay, S.; Gope, M.; Rai, A.K.; Nayek, S. Contamination Level, Source Identification and Health Risk Evaluation of Potentially Toxic Elements (PTEs) in Groundwater of an Industrial City in Eastern India. *Environmental Geochemistry and Health* **2022**, *44*, 2685–2709, doi:10.1007/s10653-021-01071-1.
802. Shi, Y.; Li, Y.; Yuan, X.; Fu, J.; Ma, Q.; Wang, Q. Environmental and Human Health Risk Evaluation of Heavy Metals in Ceramsites from Municipal Solid Waste Incineration Fly Ash. *Environmental Geochemistry and Health* **2020**, *42*, 3779–3794, doi:10.1007/s10653-020-00639-7.
803. Wang, C.; Wang, W.; Sardans, J.; Singla, A.; Zeng, C.; Lai, D.Y.F.; Peñuelas, J. Effects of Steel Slag and Biochar Amendments on CO<sub>2</sub>, CH<sub>4</sub>, and N<sub>2</sub>O Flux, and Rice Productivity in a Subtropical Chinese Paddy Field. *Environmental Geochemistry and Health* **2019**, *41*, 1419–1431, doi:10.1007/s10653-018-0224-7.
804. Wang, M.; Wang, C.; Lan, X.; Abid, A.A.; Xu, X.; Singla, A.; Sardans, J.; Llusà, J.; Peñuelas, J.; Wang, W. Coupled Steel Slag and Biochar Amendment Correlated with Higher Methanotrophic Abundance and Lower CH<sub>4</sub> Emission in Subtropical Paddies. *Environmental Geochemistry and Health* **2020**, *42*, 483–497, doi:10.1007/s10653-019-00378-4.
805. Al-Subari, L.; Yaqubi, N.A.; Selcukhan, O.; Ekinici, A. Environmental and Economical Assessment of Earth-Retaining Walls for Design Optimization. *Environmental Geotechnics* **2022**, doi:10.1680/jenge.21.00151.
806. Chen, Q.-N.; Li, S.; Huang, X.-C. The Strength and Durability of Steel Fibre Recycled Concrete in Chloride Environments. *Environmental Geotechnics* **2019**, *9*, 85–93, doi:10.1680/jenge.18.00057.
807. Delgado, B.G.; Viana Da Fonseca, A.; Fortunato, E.; Motta, L.M.G.D. Particle Morphology's Influence on the Rail Ballast Behaviour of a Steel Slag Aggregate. *Environmental Geotechnics* **2021**, doi:10.1680/jenge.18.00203.
808. Roque, A.J.; Monteiro, V. Hazardous Waste on Waste Rock of São Pedro Da Cova Coal Mine (Portugal): Site Reclamation. *Environmental Geotechnics* **2021**, doi:10.1680/jenge.20.00013.
809. Jones, S.R.; Shedd, J.S.; Oh, J.; Lungu, C.T. Evaluating the Effects of Modified Windscreens on Organic Vapor Monitor Performance. *Environmental Health Insights* **2022**, *16*, doi:10.1177/11786302221078430.
810. Ding, J.; Li, Y.; Liu, J.; Qi, G.; Liu, Q.; Dong, L. Life Cycle Assessment of Environmental Impacts of Cold and Hot Break Tomato Paste Packaged in Steel

- Drums and Exported from Xinjiang, China. *Environmental Impact Assessment Review* **2023**, *98*, doi:10.1016/j.eiar.2022.106939.
811. Navarro, I.J.; Martí, J.V.; Yepes, V. Reliability-Based Maintenance Optimization of Corrosion Preventive Designs under a Life Cycle Perspective. *Environmental Impact Assessment Review* **2019**, *74*, 23–34, doi:10.1016/j.eiar.2018.10.001.
  812. Palazzo, J.; Geyer, R. Consequential Life Cycle Assessment of Automotive Material Substitution: Replacing Steel with Aluminum in Production of North American Vehicles. *Environmental Impact Assessment Review* **2019**, *75*, 47–58, doi:10.1016/j.eiar.2018.12.001.
  813. Pons, J.J.; Villalba Sanchis, I.; Insa Franco, R.; Yepes, V. Life Cycle Assessment of a Railway Tracks Substructures: Comparison of Ballast and Ballastless Rail Tracks. *Environmental Impact Assessment Review* **2020**, *85*, doi:10.1016/j.eiar.2020.106444.
  814. Bachner, G.; Wolkinger, B.; Mayer, J.; Tuerk, A.; Steininger, K.W. Risk Assessment of the Low-Carbon Transition of Austria's Steel and Electricity Sectors. *Environmental Innovation and Societal Transitions* **2020**, *35*, 309–332, doi:10.1016/j.eist.2018.12.005.
  815. Löfgren, Å.; Rootzén, J. Brick by Brick: Governing Industry Decarbonization in the Face of Uncertainty and Risk. *Environmental Innovation and Societal Transitions* **2021**, *40*, 189–202, doi:10.1016/j.eist.2021.07.002.
  816. Arslan, E.; Erenoglu, R.C. Assessment of Hotspots Using Sparse Autoencoder in Industrial Zones. *Environmental Monitoring and Assessment* **2019**, *191*, doi:10.1007/s10661-019-7572-3.
  817. Aslam, I.; Qadir, A.; Ahmad, S.R. A Preliminary Assessment of Microplastics in Indoor Dust of a Developing Country in South Asia. *Environmental Monitoring and Assessment* **2022**, *194*, doi:10.1007/s10661-022-09928-3.
  818. Bożym, M. Assessment of Biototoxicity of Three Types of Landfilled Foundry Waste on the Basis of Dehydrogenase Activity. *Environmental Monitoring and Assessment* **2022**, *194*, doi:10.1007/s10661-022-10320-4.
  819. Cetin, B.; Yurdakul, S.; Odabasi, M. Polybrominated Diphenyl Ethers (PBDEs) Pollution in Soil of a Highly Industrialized Region (Dilovasi) in Turkey: Concentrations, Spatial and Temporal Variations and Possible Sources. *Environmental Monitoring and Assessment* **2019**, *191*, doi:10.1007/s10661-019-7610-1.
  820. Ekanem, A.M.; Akpan, A.E.; George, N.J.; Thomas, J.E. Appraisal of Protectivity and Corrosivity of Surficial Hydrogeological Units via Geo-Sounding Measurements. *Environmental Monitoring and Assessment* **2021**, *193*, doi:10.1007/s10661-021-09518-9.
  821. El-Ezaby, K.H.; El-Gammal, M.I.; Shaaban, Y.A. Using Electro- and Alum Coagulation Technologies for Treatment of Wastewater from Fruit Juice Industry in New Damietta City, Egypt. *Environmental Monitoring and Assessment* **2021**, *193*, doi:10.1007/s10661-021-09149-0.
  822. Herath, S.; Hagare, D.; Siddiqui, Z.; Maheshwari, B. Microplastics in Urban Stormwater—Developing a Methodology for Its Monitoring. *Environmental*

- Monitoring and Assessment* **2022**, *194*, doi:10.1007/s10661-022-09849-1.
823. Karmaker, A.; Hasan, M.; Ahmed, S. A Modified Approach to Industrial Pollution Projection System for the Assessment of Sectoral Pollution Loads in Bangladesh. *Environmental Monitoring and Assessment* **2022**, *194*, doi:10.1007/s10661-022-10073-0.
824. Mikelonis, A.M.; Abdel-Hady, A.; Aslett, D.; Ratliff, K.; Touati, A.; Archer, J.; Serre, S.; Mickelsen, L.; Taft, S.; Calfee, M.W. Comparison of Surface Sampling Methods for an Extended Duration Outdoor Biological Contamination Study. *Environmental Monitoring and Assessment* **2020**, *192*, doi:10.1007/s10661-020-08434-8.
825. Olise, F.S.; Ogundele, L.T.; Olajire, M.A.; Owoade, O.K.; Oloyede, F.A.; Fawole, O.G.; Ezech, G.C. Biomonitoring of Environmental Pollution in the Vicinity of Iron and Steel Smelters in Southwestern Nigeria Using Transplanted Lichens and Mosses. *Environmental Monitoring and Assessment* **2019**, *191*, doi:10.1007/s10661-019-7810-8.
826. Pottier, G.; Marchand, F.; Beaulaton, L. A Comprehensive Guide to Set up Correctly an Electrofishing Gear. *Environmental Monitoring and Assessment* **2020**, *192*, doi:10.1007/s10661-019-8000-4.
827. Rodgers, K.J.; McLellan, I.S.; Cuthbert, S.J.; Hursthouse, A.S. Enhanced Characterisation for the Management of Industrial Steel Processing by Products: Potential of Sequential Chemical Extraction. *Environmental Monitoring and Assessment* **2019**, *191*, doi:10.1007/s10661-019-7275-9.
828. Roy, A.; Bhattacharya, T. Ecological and Human Health Risks from Pseudo-Total and Bio-Accessible Metals in Street Dusts. *Environmental Monitoring and Assessment* **2022**, *194*, doi:10.1007/s10661-021-09658-y.
829. Saha, P.; Paul, B. Groundwater Quality Assessment in an Industrial Hotspot through Interdisciplinary Techniques. *Environmental Monitoring and Assessment* **2019**, *191*, doi:10.1007/s10661-019-7418-z.
830. Shahmoradi, B.; Hajimirzaei, S.; Amanollahi, J.; Wantalla, K.; Maleki, A.; Lee, S.-M.; Shim, M.J. Influence of Iron Mining Activity on Heavy Metal Contamination in the Sediments of the Aqyazi River, Iran. *Environmental Monitoring and Assessment* **2020**, *192*, doi:10.1007/s10661-020-08466-0.
831. Trifuoggi, M.; Pagano, G.; Oral, R.; Gravina, M.; Toscanesi, M.; Mozzillo, M.; Siciliano, A.; Burić, P.; Lyons, D.M.; Palumbo, A.; et al. Topsoil and Urban Dust Pollution and Toxicity in Taranto (Southern Italy) Industrial Area and in a Residential District. *Environmental Monitoring and Assessment* **2019**, *191*, doi:10.1007/s10661-018-7164-7.
832. Yurtseven, H.; Akgul, M.; Akay, A.O.; Akburak, S.; Cigizoglu, H.K.; Demir, M.; Ozturk, T.; Eksi, M. High Accuracy Monitoring System to Estimate Forest Road Surface Degradation on Horizontal Curves. *Environmental Monitoring and Assessment* **2019**, *191*, doi:10.1007/s10661-018-7155-8.
833. Al-Mamun, M.R.; Kader, S.; Islam, M.S. Solar-TiO<sub>2</sub> Immobilized Photocatalytic



- Reactors Performance Assessment in the Degradation of Methyl Orange Dye in Aqueous Solution. *Environmental Nanotechnology, Monitoring and Management* **2021**, *16*, doi:10.1016/j.enmm.2021.100514.
834. Budiman, F.; Ismardi, A.; Muhammad, R.; Hardinah, T.; Rozana, M.; Ismail, S.; Lockman, Z. Thermally Oxidized Steel Mesh for Oil-Water Separation Application and Its Automation Device. *Environmental Nanotechnology, Monitoring and Management* **2021**, *16*, doi:10.1016/j.enmm.2021.100538.
835. Thomas, A. 'Heart of Steel': How Trade Unions Lobby the European Union over Emissions Trading. *Environmental Politics* **2021**, *30*, 1217–1236, doi:10.1080/09644016.2021.1871812.
836. Arndt, J.; Healy, R.M.; Setyan, A.; Flament, P.; Deboudt, K.; Riffault, V.; Alleman, L.Y.; Mbengue, S.; Wenger, J.C. Characterization and Source Apportionment of Single Particles from Metalworking Activities. *Environmental Pollution* **2021**, *270*, doi:10.1016/j.envpol.2020.116078.
837. Berthiaume, A.; Galarneau, E.; Marson, G. Polycyclic Aromatic Compounds (PACs) in the Canadian Environment: Sources and Emissions. *Environmental Pollution* **2021**, *269*, doi:10.1016/j.envpol.2020.116008.
838. Brehmer, C.; Norris, C.; Barkjohn, K.K.; Bergin, M.H.; Zhang, J.; Cui, X.; Zhang, Y.; Black, M.; Li, Z.; Shafer, M.; et al. The Impact of Household Air Cleaners on the Chemical Composition and Children's Exposure to PM<sub>2.5</sub> Metal Sources in Suburban Shanghai. *Environmental Pollution* **2019**, *253*, 190–198, doi:10.1016/j.envpol.2019.07.003.
839. Chen, Z.; Afshari, A.; Mo, J. A Method Using Porous Media to Deliver Gas-Phase Phthalates Rapidly and at a Constant Concentration: Effects of Temperature and Media. *Environmental Pollution* **2020**, *262*, doi:10.1016/j.envpol.2019.113823.
840. dos Santos, P.R.S.; Fernandes, G.J.T.; Moraes, E.P.; Moreira, L.F.F. Tropical Climate Effect on the Toxic Heavy Metal Pollutant Course of Road-Deposited Sediments. *Environmental Pollution* **2019**, *251*, 766–772, doi:10.1016/j.envpol.2019.05.043.
841. Dutton, M.D.; Thorn, R.; Lau, W.; Vasiluk, L.; Hale, B. Gastric Bioaccessibility Is a Conservative Measure of Nickel Bioavailability after Oral Exposure: Evidence from Ni-Contaminated Soil, Pure Ni Substances and Ni Alloys. *Environmental Pollution* **2021**, *268*, doi:10.1016/j.envpol.2020.115830.
842. Elumalai, P.; Parthipan, P.; AlSalhi, M.; Huang, M.; Devanesan, S.; Karthikeyan, O.; Kim, W.; Rajasekar, A. Characterization of Crude Oil Degrading Bacterial Communities and Their Impact on Biofilm Formation. *Environmental Pollution* **2021**, *286*, doi:10.1016/j.envpol.2021.117556.
843. Elumalai, P.; Parthipan, P.; Huang, M.; Muthukumar, B.; Cheng, L.; Govarthanan, M.; Rajasekar, A. Enhanced Biodegradation of Hydrophobic Organic Pollutants by the Bacterial Consortium: Impact of Enzymes and Biosurfactants. *Environmental Pollution* **2021**, *289*, doi:10.1016/j.envpol.2021.117956.
844. Font, A.; Tremper, A.H.; Priestman, M.; Kelly, F.J.; Canonaco, F.; Prévôt, A.S.H.;

- Green, D.C. Source Attribution and Quantification of Atmospheric Nickel Concentrations in an Industrial Area in the United Kingdom (UK). *Environmental Pollution* **2022**, *293*, doi:10.1016/j.envpol.2021.118432.
845. Grandy, J.J.; Lashgari, M.; Heide, H.V.; Poole, J.; Pawliszyn, J. Introducing a Mechanically Robust SPME Sampler for the On-Site Sampling and Extraction of a Wide Range of Untargeted Pollutants in Environmental Waters. *Environmental Pollution* **2019**, *252*, 825–834, doi:10.1016/j.envpol.2019.06.013.
846. Haskins, D.L.; Brown, M.K.; Qin, C.; Xu, X.; Pilgrim, M.A.; Tuberville, T.D. Multi-Decadal Trends in Mercury and Methylmercury Concentrations in the Brown Watersnake (Nerodia Taxipilota). *Environmental Pollution* **2021**, *276*, doi:10.1016/j.envpol.2021.116722.
847. Hsu, C.; Chi, K.; Wu, C.; Lin, S.; Hsu, W.; Tseng, C.; Chen, M.; Chen, Y. Integrated Analysis of Source-Specific Risks for PM<sub>2.5</sub>-Bound Metals in Urban, Suburban, Rural, and Industrial Areas. *Environmental Pollution* **2021**, *275*, doi:10.1016/j.envpol.2021.116652.
848. Huang, J.; Meng, X.; Zheng, Z.; Gao, Y. Effect of Multi-Pollutant State of Ozone and Sulfur Dioxide on Atmospheric Corrosivity Map of Guangdong Province. *Environmental Pollution* **2019**, *251*, 885–891, doi:10.1016/j.envpol.2019.05.073.
849. Huang, J.; Wu, G.; Zhang, X.; Zhang, C. New Insights into Particle-Bound Trace Elements in Surface Snow, Eastern Tien Shan, China. *Environmental Pollution* **2020**, *267*, doi:10.1016/j.envpol.2020.115272.
850. Jiang, C.; Yin, L.; Li, Z.; Wen, X.; Luo, X.; Hu, S.; Yang, H.; Long, Y.; Deng, B.; Huang, L.; et al. Microplastic Pollution in the Rivers of the Tibet Plateau. *Environmental Pollution* **2019**, *249*, 91–98, doi:10.1016/j.envpol.2019.03.022.
851. Koroleva, T.V.; Semenov, I.N.; Sharapova, A.V.; Krechetov, P.P.; Lednev, S.A. Ecological Consequences of Space Rocket Accidents in Kazakhstan between 1999 and 2018. *Environmental Pollution* **2021**, *268*, doi:10.1016/j.envpol.2020.115711.
852. Kousehlar, M.; Widom, E.; Kuentz, D. Osmium Isotope Geochemistry of Steel Plant Emissions Using Tree Bark Biomonitoring. *Environmental Pollution* **2021**, *272*, doi:10.1016/j.envpol.2020.115976.
853. Leung, M.M.-L.; Ho, Y.-W.; Lee, C.-H.; Wang, Y.; Hu, M.; Kwok, K.W.-H.; Chua, S.-L.; Fang, J.K.-H. Improved Raman Spectroscopy-Based Approach to Assess Microplastics in Seafood. *Environmental Pollution* **2021**, *289*, doi:10.1016/j.envpol.2021.117648.
854. Liu, J.; Wang, S.; Yi, H.; Tang, X.; Li, Z.; Yu, Q.; Zhao, S.; Gao, F.; Zhou, Y.; Wang, Y. Air Pollutant Emission and Reduction Potentials from the Sintering Process of the Iron and Steel Industry in China in 2017. *Environmental Pollution* **2022**, *307*, doi:10.1016/j.envpol.2022.119512.
855. Liu, J.; Zhou, Y.; She, J.; Tsang, D.C.W.; Lippold, H.; Wang, J.; Jiang, Y.; Wei, X.; Yuan, W.; Luo, X.; et al. Quantitative Isotopic Fingerprinting of Thallium Associated with Potentially Toxic Elements (PTEs) in Fluvial Sediment Cores with Multiple Anthropogenic Sources. *Environmental Pollution* **2020**, *266*,

- doi:10.1016/j.envpol.2020.115252.
856. Liu, S.; Liu, W.; Jiao, F.; Qin, W.; Yang, C. Production and Resource Utilization of Flue Gas Desulfurized Gypsum in China- A Review. *Environmental Pollution* **2021**, 288, doi:10.1016/j.envpol.2021.117799.
857. Martínez, A.; Di Cesare, A.; Mari-Mena, N.; García-Gómez, G.; Garcia-Herrero, A.; Corno, G.; Fontaneto, D.; Eckert, E.M. Tossed 'Good Luck' Coins as Vectors for Anthropogenic Pollution into Aquatic Environment. *Environmental Pollution* **2020**, 259, doi:10.1016/j.envpol.2019.113800.
858. Marvin, C.; Berthiaume, A.; Burniston, D.; Chibwe, L.; Dove, A.; Evans, M.; Hewitt, L.; Hodson, P.; Muir, D.; Parrott, J.; et al. Polycyclic Aromatic Compounds in the Canadian Environment: Aquatic and Terrestrial Environments. *Environmental Pollution* **2021**, 285, doi:10.1016/j.envpol.2021.117442.
859. Massimi, L.; Ristorini, M.; Simonetti, G.; Frezzini, M.A.; Astolfi, M.L.; Canepari, S. Spatial Mapping and Size Distribution of Oxidative Potential of Particulate Matter Released by Spatially Disaggregated Sources. *Environmental Pollution* **2020**, 266, doi:10.1016/j.envpol.2020.115271.
860. Meng, Q.; Hu, D.; Zhang, Y.; Chen, X.; Zhang, L.; Wang, Z. Do Industrial Parks Generate Intra-Heat Island Effects in Cities? New Evidence, Quantitative Methods, and Contributing Factors from a Spatiotemporal Analysis of Top Steel Plants in China. *Environmental Pollution* **2022**, 292, doi:10.1016/j.envpol.2021.118383.
861. Patra, C.; Gupta, R.; Bedadeep, D.; Narayanasamy, S. Surface Treated Acid-Activated Carbon for Adsorption of Anionic Azo Dyes from Single and Binary Adsorptive Systems: A Detail Insight. *Environmental Pollution* **2020**, 266, doi:10.1016/j.envpol.2020.115102.
862. Wang, Y.; Liu, B.; Zhang, Y.; Dai, Q.; Song, C.; Duan, L.; Guo, L.; Zhao, J.; Xue, Z.; Bi, X.; et al. Potential Health Risks of Inhaled Toxic Elements and Risk Sources during Different COVID-19 Lockdown Stages in Linfen, China. *Environmental Pollution* **2021**, 284, doi:10.1016/j.envpol.2021.117454.
863. Xu, H.; Zhu, Y.; Wang, L.; Lin, C.-J.; Jang, C.; Zhou, Q.; Yu, B.; Wang, S.; Xing, J.; Yu, L. Source Contribution Analysis of Mercury Deposition Using an Enhanced CALPUFF-Hg in the Central Pearl River Delta, China. *Environmental Pollution* **2019**, 250, 1032–1043, doi:10.1016/j.envpol.2019.04.008.
864. Yang, H.; Tao, W.; Liu, Y.; Qiu, M.; Liu, J.; Jiang, K.; Yi, K.; Xiao, Y.; Tao, S. The Contribution of the Beijing, Tianjin and Hebei Region's Iron and Steel Industry to Local Air Pollution in Winter. *Environmental Pollution* **2019**, 245, 1095–1106, doi:10.1016/j.envpol.2018.11.088.
865. Yang, L.; Shen, J.; Zheng, M.; Yang, Q.; Li, D.; Liu, G. Occurrence of Chlorinated and Brominated Polycyclic Aromatic Hydrocarbons from Electric Arc Furnace for Steelmaking. *Environmental Pollution* **2022**, 294, doi:10.1016/j.envpol.2021.118663.
866. Chetri, J.K.; Reddy, K.R.; Grubb, D.G. Innovative Biogeochemical Cover to Mitigate Landfill Gas Emissions: Investigation of Controlling Parameters Based

- on Batch and Column Experiments. *Environmental Processes* **2019**, *6*, 935–949, doi:10.1007/s40710-019-00390-x.
867. Tureyen, O.E.; Yakan, S.D.; Yilmaz, A.; Yetiskin, B.; Okay, O.; Okay, O.S. Polycyclic Aromatic Hydrocarbon Accumulation Performances of Monophasic Butyl Rubber Passive Samplers. *Environmental Processes* **2022**, *9*, doi:10.1007/s40710-022-00578-8.
868. Chen, A.; Wen, Y.; Han, X.; Qi, J.; Liu, Z.-H.; Zhang, S.; Li, G. Electrochemical Decomposition of Wheat Straw Lignin into Guaiacyl-, Syringyl-, and Phenol-Type Compounds Using Pb/PbO<sub>2</sub> Anode and Alloyed Steel Cathode in Alkaline Solution. *Environmental Progress and Sustainable Energy* **2019**, *38*, doi:10.1002/ep.13117.
869. Güngör, O.; Tozlu, A.; Arslantürk, C. Assessment of Waste-to-Energy Potential of ELT Management: An Actual Case Study for Erzincan. *Environmental Progress and Sustainable Energy* **2022**, *41*, doi:10.1002/ep.13760.
870. Jing, R.; Yasir, M.W.; Qian, J.; Zhang, Z. Assessments of Greenhouse Gas (GHG) Emissions from Stainless Steel Production in China Using Two Evaluation Approaches. *Environmental Progress and Sustainable Energy* **2019**, *38*, 47–55, doi:10.1002/ep.13125.
871. Kuo, Y.-M.; Huang, K.-L.; Wang, J.-W.; Tsai, C.-H.; Lin, S.-L. An Alternative Approach to Reclaim Spent Nickel–Metal Hydride Batteries. *Environmental Progress and Sustainable Energy* **2020**, *39*, doi:10.1002/ep.13433.
872. Librandi, P.; Costa, G.; Stendardo, S.; Baciocchi, R. Carbonation of BOF Slag in a Rotary Kiln Reactor in View of the Scale-Up of the Wet Route Process. *Environmental Progress and Sustainable Energy* **2019**, *38*, doi:10.1002/ep.13140.
873. Moslemzadeh, M.; Salehfar, H.; Ghanbari, F.; Aghayani, E.; Mahdavianpour, M. Magnetically Recoverable Steel Slag/TiO<sub>2</sub> Visible-Light-Driven Photocatalyst for Paraquat Degradation. *Environmental Progress and Sustainable Energy* **2022**, doi:10.1002/ep.13963.
874. Qu, H.; Lai, N.-C.; Jiang, B.; Liu, X.; Xia, D. An Efficient and Continuous Filter Operation for Dust-Laden Flue Gas Based on a Self-Cleaning Stainless Steel Weaved Filter. *Environmental Progress and Sustainable Energy* **2022**, doi:10.1002/ep.13952.
875. Shamsi, Z.; Mohamadi, Z.; Zamani, A.; Alizadeh, A. Magnetic Adsorbent Based on the Electric Arc Furnace Dust for the Removal of Methylene Blue Dye from Aqueous Solution. *Environmental Progress and Sustainable Energy* **2021**, *40*, doi:10.1002/ep.13636.
876. Wang, Z.; Li, J.; He, X.; Yang, G.; Qi, J.; Zhao, C. Organic Pollutants Removal Performance and Enhanced Mechanism Investigation of Surface-Modified Steel Slag Particle Electrode. *Environmental Progress and Sustainable Energy* **2019**, *38*, S7–S14, doi:10.1002/ep.12910.
877. Huyen, D.T.T.; Tram, L.T.B.; Truong, H.N.; Van Thanh, T. Application of Fuzzy Analytic Hierarchy Process and Linear Goal Programming for Selection of Best

- Available Techniques of the Cold Rolled Coil Manufacturing Processes: A Case Study in Binh Duong, Vietnam. *Environmental Quality Management* **2022**, *31*, 325–346, doi:10.1002/tqem.21818.
878. Okedere, O.B.; Fakinle, B.S.; Ajala, O.E. Particulates and Carbon Monoxide Pollution on Production Floor of Steel Recycling Plant. *Environmental Quality Management* **2019**, doi:10.1002/tqem.21640.
879. Fan, Y.; Chen, X.; Chen, Z.; Zhou, X.; Lu, X.; Liu, J. Pollution Characteristics and Source Analysis of Heavy Metals in Surface Sediments of Luoyuan Bay, Fujian. *Environmental Research* **2022**, *203*, doi:10.1016/j.envres.2021.111911.
880. Gennaro, V.; Cervellera, S.; Cusatelli, C.; Miani, A.; Pesce, F.; De Gennaro, G.; Distanto, A.; Vimercati, L.; Gesualdo, L.; Piscitelli, P. Use of Official Municipal Demographics for the Estimation of Mortality in Cities Suffering from Heavy Environmental Pollution: Results of the First Study on All the Neighborhoods of Taranto from 2011 to 2020. *Environmental Research* **2022**, *204*, doi:10.1016/j.envres.2021.112007.
881. Huang, H.; Wang, Z.; Dai, C.; Guo, J.; Zhang, X. Volatile Organic Compounds Emission in the Rubber Products Manufacturing Processes. *Environmental Research* **2022**, *212*, doi:10.1016/j.envres.2022.113485.
882. Jothi, K.J.; Balachandran, S.; Mohanraj, K.; Prakash, N.; Subhasri, A.; Gopala Krishnan, P.S.; Palanivelu, K. Fabrications of Hybrid Polyurethane-Pd Doped ZrO<sub>2</sub> Smart Carriers for Self-Healing High Corrosion Protective Coatings. *Environmental Research* **2022**, *211*, doi:10.1016/j.envres.2022.113095.
883. Nascimento, A.P.; Santos, J.M.; Mill, J.G.; Toledo de Almeida Albuquerque, T.; Reis Júnior, N.C.; Reisen, V.A.; Pagel, É.C. Association between the Incidence of Acute Respiratory Diseases in Children and Ambient Concentrations of SO<sub>2</sub>, PM<sub>10</sub> and Chemical Elements in Fine Particles. *Environmental Research* **2020**, *188*, doi:10.1016/j.envres.2020.109619.
884. Ndaw, S.; Leso, V.; Bousoumah, R.; Rémy, A.; Bocca, B.; Duca, R.C.; Godderis, L.; Hardy, E.; Janasik, B.; van Nieuwenhuyse, A.; et al. HBM4EU Chromates Study - Usefulness of Measurement of Blood Chromium Levels in the Assessment of Occupational Cr(VI) Exposure. *Environmental Research* **2022**, *214*, doi:10.1016/j.envres.2022.113758.
885. Negi, R.; Chandel, M.K. Analysing Water-Energy-GHG Nexus in a Wastewater Treatment Plant of Mumbai Metropolitan Region, India. *Environmental Research* **2021**, *196*, doi:10.1016/j.envres.2021.110931.
886. Pérez, S.; German-Labaume, C.; Mathiot, S.; Goix, S.; Chamaret, P. Using Bayesian Networks for Environmental Health Risk Assessment. *Environmental Research* **2022**, *204*, doi:10.1016/j.envres.2021.112059.
887. Santonen, T.; Alimonti, A.; Bocca, B.; Duca, R.C.; Galea, K.S.; Godderis, L.; Göen, T.; Gomes, B.; Hanser, O.; Iavicoli, I.; et al. Setting up a Collaborative European Human Biological Monitoring Study on Occupational Exposure to Hexavalent Chromium. *Environmental Research* **2019**, *177*, doi:10.1016/j.envres.2019.108583.

888. Santonen, T.; Porras, S.P.; Bocca, B.; Bousoumah, R.; Duca, R.C.; Galea, K.S.; Godderis, L.; Göen, T.; Hardy, E.; Iavicoli, I.; et al. HBM4EU Chromates Study - Overall Results and Recommendations for the Biomonitoring of Occupational Exposure to Hexavalent Chromium. *Environmental Research* **2022**, *204*, doi:10.1016/j.envres.2021.111984.
889. Tian, X.; Beén, F.; Bäuerlein, P.S. Quantum Cascade Laser Imaging (LDIR) and Machine Learning for the Identification of Environmentally Exposed Microplastics and Polymers. *Environmental Research* **2022**, *212*, doi:10.1016/j.envres.2022.113569.
890. Zhang, Y.; Yuan, Z.; Zhao, L.; Liao, L.; Zhao, H. A Systematic Construction of Water-Electricity Cogeneration and Thermal Membrane Coupling Desalination Technology Using the Waste Heat in Steel Industry. *Environmental Research* **2022**, *212*, doi:10.1016/j.envres.2022.113458.
891. Horvath, G.; Szalay, Z.; Simo, F.; Salgo, K.; Krcma, F.; Matejova, S. Recycling of a Wastewater to Iron Oxide Micro Structures. *Environmental Research Communications* **2019**, *1*, doi:10.1088/2515-7620/ab37c1.
892. Miller, S.A.; Grubert, E. Us Industrial Sector Decoupling of Energy Use and Greenhouse Gas Emissions under Covid: Durability and Decarbonization. *Environmental Research Communications* **2021**, *3*, doi:10.1088/2515-7620/abf0f2.
893. Rodriguez Morris, M.I.; Hicks, A. Life Cycle Assessment of Stainless-Steel Reusable Speculums versus Disposable Acrylic Speculums in a University Clinic Setting: A Case Study. *Environmental Research Communications* **2022**, *4*, doi:10.1088/2515-7620/ac4a3d.
894. Hertwich, E.G.; Ali, S.; Ciacci, L.; Fishman, T.; Heeren, N.; Masanet, E.; Asghari, F.N.; Olivetti, E.; Pauliuk, S.; Tu, Q.; et al. Material Efficiency Strategies to Reducing Greenhouse Gas Emissions Associated with Buildings, Vehicles, and Electronics - A Review. *Environmental Research Letters* **2019**, *14*, doi:10.1088/1748-9326/ab0fe3.
895. Lan, K.; Kelley, S.S.; Nepal, P.; Yao, Y. Dynamic Life Cycle Carbon and Energy Analysis for Cross-Laminated Timber in the Southeastern United States. *Environmental Research Letters* **2019**, *15*, doi:10.1088/1748-9326/abc5e6.
896. Rodriguez-Alloza, A.; Heihsel, M.; Fry, J.; Gallego, J.; Geschke, A.; Wood, R.; Lenzen, M. Consequences of Long-Term Infrastructure Decisions?The Case of Self-Healing Roads and Their CO2 Emissions. *Environmental Research Letters* **2019**, *14*, doi:10.1088/1748-9326/ab424a.
897. Schafer, P.; Schmidt, M. Discrete-Point Analysis of the Energy Demand of Primary versus Secondary Metal Production. *Environmental Science & Technology* **2020**, *54*, 507–516, doi:10.1021/acs.est.9b05101.
898. Watari, T.; Nansai, K.; Giurco, D.; Nakajima, K.; McLellan, B.; Helbig, C. Global Metal Use Targets in Line with Climate Goals. *Environmental Science & Technology* **2020**, *54*, 12476–12483, doi:10.1021/acs.est.0c02471.
899. Abdelbasir, S.; Khalek, M. From Waste to Waste: Iron Blast Furnace Slag for Heavy

- Metal Ions Removal from Aqueous System. *Environmental Science and Pollution Research* **2022**, *29*, 57964–57979, doi:10.1007/s11356-022-19834-3.
900. Al-nami, S.Y.; Al-Qahtani, S.D.; Snari, R.M.; Ibarhiam, S.F.; Alfi, A.A.; Aldawsari, A.M.; El-Metwaly, N.M. Preparation of Photoluminescent and Anticorrosive Epoxy Paints Immobilized with Nanoscale Graphene from Sugarcane Bagasse Agricultural Waste. *Environmental Science and Pollution Research* **2022**, *29*, 60173–60188, doi:10.1007/s11356-022-20111-6.
901. Ali, B. Development of Environment-Friendly and Ductile Recycled Aggregate Concrete through Synergetic Use of Hybrid Fibers. *Environmental Science and Pollution Research* **2022**, *29*, 34452–34463, doi:10.1007/s11356-022-18627-y.
902. Ali, B.; Ouni, M.H.E.; Kurda, R. Life Cycle Assessment (LCA) of Precast Concrete Blocks Utilizing Ground Granulated Blast Furnace Slag. *Environmental Science and Pollution Research* **2022**, doi:10.1007/s11356-022-21570-7.
903. Araujo, S.F.; Caldeira, C.L.; Ciminelli, V.S.T.; Silva, A.; Amorim, C.C. Versatility of Iron-Rich Steel Waste for the Removal of High Arsenic and Sulfate Concentrations in Water. *Environmental Science and Pollution Research* **2019**, *26*, 4266–4276, doi:10.1007/s11356-018-3168-7.
904. Araujo, S.F.; Caldeira, C.L.; Ciminelli, V.S.T.; Borba, R.P.; Rodrigues, J.P.; Simões, G.F. Basic Oxygen Furnace Sludge to Treat Industrial Arsenic- and Sulfate-Rich Acid Mine Drainage. *Environmental Science and Pollution Research* **2022**, *29*, 37777–37789, doi:10.1007/s11356-021-18120-y.
905. Babalghaith, A.; Koting, S.; Sulong, N.; Khan, M.; Milad, A.; Yusoff, N.; Ibrahim, M.; Mohamed, A. A Systematic Review of the Utilization of Waste Materials as Aggregate Replacement in Stone Matrix Asphalt Mixes. *Environmental Science and Pollution Research* **2022**, *29*, 35557–35582, doi:10.1007/s11356-022-19447-w.
906. Balasbaneh, A.T.; Ramli, M.Z. A Comparative Life Cycle Assessment (LCA) of Concrete and Steel-Prefabricated Prefinished Volumetric Construction Structures in Malaysia. *Environmental Science and Pollution Research* **2020**, *27*, 43186–43201, doi:10.1007/s11356-020-10141-3.
907. Balli, M.F.; Sel, Ç. Sustainability Analysis of the Use of Natural Gas in the Iron and Steel Industry. *Environmental Science and Pollution Research* **2022**, doi:10.1007/s11356-022-22249-9.
908. Bargaoui, M.; Jellali, S.; Azzaz, A.A.; Jeguirim, M.; Akrou, H. Optimization of Hybrid Treatment of Olive Mill Wastewaters through Impregnation onto Raw Cypress Sawdust and Electrocoagulation. *Environmental Science and Pollution Research* **2021**, *28*, 24470–24485, doi:10.1007/s11356-020-08907-w.
909. Broomandi, P.; Tleuken, A.; Zhaxylykov, S.; Nikfal, A.; Kim, J.R.; Karaca, F. Assessment of Potential Benefits of Traffic and Urban Mobility Reductions during COVID-19 Lockdowns: Dose-Response Calculations for Material Corrosions on Built Cultural Heritage. *Environmental Science and Pollution Research* **2022**, *29*, 6491–6510, doi:10.1007/s11356-021-16078-5.
910. Chen, B.; Han, L.; Yoon, S.; Lee, W.; Zhang, Y.; Yuan, L.; Choi, Y. Applying Steel

- Slag Leachate as a Reagent Substantially Enhances PH Reduction Efficiency for Humidification Treatment. *Environmental Science and Pollution Research* **2020**, *27*, 18911–18923, doi:10.1007/s11356-020-08429-5.
911. Chen, J.; Lian, J.; Fang, Z. A Comparative Study on Adsorption and Catalytic Degradation of Tetracycline by Five Magnetic Mineral Functional Materials Prepared from Steel Pickling Waste Liquor. *Environmental Science and Pollution Research* **2022**, *29*, 78926–78941, doi:10.1007/s11356-022-21183-0.
912. Chowdhury, H.; Chowdhury, T.; Hossain, N.; Chowdhury, P.; Salam, B.; Sait, S.M.; Mahlia, T.M.I. Exergetic Sustainability Analysis of Industrial Furnace: A Case Study. *Environmental Science and Pollution Research* **2021**, *28*, 12881–12888, doi:10.1007/s11356-020-11280-3.
913. Dang, D.T.; Nguyen, M.T.; Nguyen, T.P.; Isawa, T.; Ta, Y.; Sato, R. Mechanical Properties of Steel Slag Replaced Mineral Aggregate for Road Base/Sub-Base Application Based Vietnam and Japan Standard. *Environmental Science and Pollution Research* **2022**, *29*, 42067–42073, doi:10.1007/s11356-021-16706-0.
914. Das, S.; Biswas, P.; Sarkar, S. Tertiary Treatment of Coke Plant Effluent by Indigenous Material from an Integrated Steel Plant: A Sustainable Approach. *Environmental Science and Pollution Research* **2020**, *27*, 7379–7387, doi:10.1007/s11356-019-07309-x.
915. Debnath, R.; Sastry, G.; Rai, R. An Experimental Investigation of Performance and Emission of Thumba Biodiesel Using Butanol as an Additive in an IDI CI Engine and Analysis of Results Using Multi-Objective Fuzzy-Based Genetic Algorithm. *Environmental Science and Pollution Research* **2019**, *26*, 2281–2296, doi:10.1007/s11356-018-3699-y.
916. Díaz, J.; Fernández, F.J. The Impact of Hot Metal Temperature on CO<sub>2</sub> Emissions from Basic Oxygen Converter. *Environmental Science and Pollution Research* **2020**, *27*, 33–42, doi:10.1007/s11356-019-06474-3.
917. Fan, F.; Lei, Y.; Li, L. Health Damage Assessment of Particulate Matter Pollution in Jing-Jin-Ji Region of China. *Environmental Science and Pollution Research* **2019**, *26*, 7883–7895, doi:10.1007/s11356-018-04116-8.
918. Gao, P.; Li, Y.; Lin, Y.; Chang, L.; Zhu, T. Promoting Effect of Fe/La Loading on  $\gamma$ -Al<sub>2</sub>O<sub>3</sub> Catalyst for Hydrolysis of Carbonyl Sulfur. *Environmental Science and Pollution Research* **2022**, doi:10.1007/s11356-022-20928-1.
919. Garg, R.; Singh, S.K. Treatment Technologies for Sustainable Management of Wastewater from Iron and Steel Industry — a Review. *Environmental Science and Pollution Research* **2022**, *29*, 75203–75222, doi:10.1007/s11356-022-23051-3.
920. Goudarzi, S.; Fahimirad, B.; Rajabi, M.; Baigenzhenov, O.; Hosseini-Bandegharaei, A. Recruiting Chemical Grafting Method for Surface Modification of Stainless Steel to Fabricate a Selective Sorbent for Solid Phase Microextraction of Mercury Metal Ion. *Environmental Science and Pollution Research* **2022**, doi:10.1007/s11356-022-21989-y.
921. Han, D.; Fu, Q.; Gao, S.; Zhang, X.; Feng, J.; Chen, X.; Huang, X.; Liao, H.; Cheng,



- J.; Wang, W. Investigate the Impact of Local Iron–Steel Industrial Emission on Atmospheric Mercury Concentration in Yangtze River Delta, China. *Environmental Science and Pollution Research* **2019**, *26*, 5862–5872, doi:10.1007/s11356-018-3978-7.
922. Han, S.; Yang, Y.; Liu, S.; Lu, M. Decontamination Performance and Cleaning Characteristics of Three Common Used Paved Permeable Bricks. *Environmental Science and Pollution Research* **2021**, *28*, 15114–15122, doi:10.1007/s11356-020-11706-y.
923. Hu, E.; He, Z.; Nan, X.; Yuan, Z.; Li, X. Removal of Phenanthrene and Pyrene from Contaminated Sandy Soil Using Hydrogen Peroxide Oxidation Catalyzed by Basic Oxygen Furnace Slag. *Environmental Science and Pollution Research* **2019**, *26*, 9281–9292, doi:10.1007/s11356-019-04308-w.
924. Hu, X.; Liu, Q.; Fu, Q.; Xu, H.; Shen, Y.; Liu, D.; Wang, Y.; Jia, H.; Cheng, J. A High-Resolution Typical Pollution Source Emission Inventory and Pollution Source Changes during the COVID-19 Lockdown in a Megacity, China. *Environmental Science and Pollution Research* **2021**, *28*, 45344–45352, doi:10.1007/s11356-020-11858-x.
925. Hu, Y.; Jiang, H.; Zhong, Z. Impact of Green Credit on Industrial Structure in China: Theoretical Mechanism and Empirical Analysis. *Environmental Science and Pollution Research* **2020**, *27*, 10506–10519, doi:10.1007/s11356-020-07717-4.
926. Jiang, T.; Song, J.; Yu, Y. The Influencing Factors of Carbon Trading Companies Applying Blockchain Technology: Evidence from Eight Carbon Trading Pilots in China. *Environmental Science and Pollution Research* **2022**, *29*, 28624–28636, doi:10.1007/s11356-021-18425-y.
927. Kamata, A.; Miura, T.; Katoh, M. Suppression of Arsenic Leaching from Excavated Soil and the Contribution of Soluble and Insoluble Components in Steel Slag on Arsenic Immobilization. *Environmental Science and Pollution Research* **2022**, doi:10.1007/s11356-022-23569-6.
928. Kanellopoulos, T.D.; Kapetanaki, N.; Karaouzas, I.; Botsou, F.; Mentzafou, A.; Kaberi, H.; Kapsimalis, V.; Karageorgis, A.P. Trace Element Contamination Status of Surface Marine Sediments of Greece: An Assessment Based on Two Decades (2001–2021) of Data. *Environmental Science and Pollution Research* **2022**, *29*, 45171–45189, doi:10.1007/s11356-022-20224-y.
929. Kóvágó, C.; Szekeres, B.; Szűcs-Somlyó, É.; Májlínger, K.; Jerzsele, Á.; Lehel, J. Preliminary Study to Investigate the Distribution and Effects of Certain Metals after Inhalation of Welding Fumes in Mice. *Environmental Science and Pollution Research* **2022**, *29*, 49147–49160, doi:10.1007/s11356-022-19234-7.
930. Kuttippurath, J.; Patel, V.K.; Pathak, M.; Singh, A. Improvements in SO<sub>2</sub> Pollution in India: Role of Technology and Environmental Regulations. *Environmental Science and Pollution Research* **2022**, *29*, 78637–78649, doi:10.1007/s11356-022-21319-2.
931. Liduino, V.S.; Leoni, G.B.; Sérvulo, E.F.C.; Cammarota, M.C. Investigation of

- Carbon Steel Corrosion by Oilfield Nitrate- and Sulfate-Reducing Prokaryotes Consortia in a Hypersaline Environment. *Environmental Science and Pollution Research* **2022**, doi:10.1007/s11356-022-22896-y.
932. Liu, H.; Fan, J.; Zhou, K.; Wang, Q. Exploring Regional Differences in the Impact of High Energy-Intensive Industries on CO<sub>2</sub> Emissions: Evidence from a Panel Analysis in China. *Environmental Science and Pollution Research* **2019**, *26*, 26229–26241, doi:10.1007/s11356-019-05865-w.
933. Liu, P.; Ju, Y.; Li, Y.; Wang, Z.; Mao, X.; Cao, H.; Jia, C.; Huang, T.; Gao, H.; Ma, J. Spatiotemporal Variation of Atmospheric Nitrated Polycyclic Aromatic Hydrocarbons in Semi-Arid and Petrochemical Industrialized Lanzhou City, Northwest China. *Environmental Science and Pollution Research* **2019**, *26*, 1857–1870, doi:10.1007/s11356-018-3633-3.
934. Liu, Y.; Li, H.; Li, W.; Li, Q.; Hu, X. Value Assessment for the Restoration of Industrial Relics Based on Analytic Hierarchy Process: A Case Study of Shaanxi Steel Factory in Xi'an, China. *Environmental Science and Pollution Research* **2021**, *28*, 69129–69148, doi:10.1007/s11356-021-14897-0.
935. Long, Z.; Pang, J.; Li, S.; Zhao, J.; Yang, T.; Chen, X.; Zhang, Z.; Sun, Y.; Lang, L.; Wang, N.; et al. Spatiotemporal Variations and Structural Characteristics of Carbon Emissions at the County Scale: A Case Study of Wu'an City. *Environmental Science and Pollution Research* **2022**, *29*, 65466–65488, doi:10.1007/s11356-022-20433-5.
936. Lozano-Lunar, A.; Barbudo, A.; Fernández, J.M.; Jiménez, J.R. Promotion of Circular Economy: Steelwork Dusts as Secondary Raw Material in Conventional Mortars. *Environmental Science and Pollution Research* **2020**, *27*, 89–100, doi:10.1007/s11356-019-04948-y.
937. Luo, Y.; He, D. Research Status and Future Challenge for CO<sub>2</sub> Sequestration by Mineral Carbonation Strategy Using Iron and Steel Slag. *Environmental Science and Pollution Research* **2021**, *28*, 49383–49409, doi:10.1007/s11356-021-15254-x.
938. Maia, L.C.; dos Santos, G.R.; Gurgel, L.V.A.; de Freitas Carvalho, C. Iron Recovery from the Coarse Fraction of Basic Oxygen Furnace Sludge. Part I: Optimization of Acid Leaching Conditions. *Environmental Science and Pollution Research* **2020**, *27*, 40135–40147, doi:10.1007/s11356-020-09910-x.
939. Mishra, U.; Sarsaiya, S.; Gupta, A. A Systematic Review on the Impact of Cement Industries on the Natural Environment. *Environmental Science and Pollution Research* **2022**, *29*, 18440–18451, doi:10.1007/s11356-022-18672-7.
940. Mohammadtaheri, M.; Li, Y.; Yang, Q. Hard Cr<sub>2</sub>O<sub>3</sub> Coatings on SS316L Substrates Prepared by Reactive Magnetron Sputtering Technique: A Potential Candidate for Orthopedic Implants. *Environmental Science and Pollution Research* **2021**, *28*, 25146–25154, doi:10.1007/s11356-019-05006-3.
941. Moradnia, M.; Attar, H.M.; Heidari, Z.; Mohammadi, F.; Kelishadi, R. Prenatal Exposure to Chromium (Cr) and Nickel (Ni) in a Sample of Iranian Pregnant Women: Urinary Levels and Associated Socio-Demographic and Lifestyle Factors.

- Environmental Science and Pollution Research* **2021**, *28*, 63412–63421, doi:10.1007/s11356-021-15201-w.
942. Moroz, I.; Scapolio, L.; Cesarino, I.; Leao, A.; Bonanomi, G. Toxicity of Cigarette Butts and Possible Recycling Solutions-a Literature Review. *Environmental Science and Pollution Research* **2021**, *28*, 10450–10473, doi:10.1007/s11356-020-11856-z.
943. Nguyen, H.T.; Nguyen, T.T.T.; Tung, N.H.; Hoang, A.Q.; Pham, L.H.; Minh, T.B. Levels, Profiles, and Emission Characteristics of Chlorobenzenes in Ash Samples from Some Industrial Thermal Facilities in Northern Vietnam. *Environmental Science and Pollution Research* **2019**, *26*, 188–198, doi:10.1007/s11356-018-3591-9.
944. Nguyen, L.H.; Nguyen, T.D.; Tran, T.V.N.; Nguyen, D.L.; Tran, H.S.; Nguyen, T.L.; Nguyen, T.H.; Nguyen, H.G.; Nguyen, T.P.; Nguyen, N.T.; et al. Steel Slag Quality Control for Road Construction Aggregates and Its Environmental Impact: Case Study of Vietnamese Steel Industry—Leaching of Heavy Metals from Steel-Making Slag. *Environmental Science and Pollution Research* **2022**, *29*, 41983–41991, doi:10.1007/s11356-021-16438-1.
945. Othmani, A.; Kesraoui, A.; Akrouit, H.; López-Mesas, M.; Seffen, M.; Valiente, M. Use of Alternating Current for Colored Water Purification by Anodic Oxidation with SS/PbO<sub>2</sub> and Pb/PbO<sub>2</sub> Electrodes. *Environmental Science and Pollution Research* **2019**, *26*, 25969–25984, doi:10.1007/s11356-019-05722-w.
946. Özdemir, A.; Önder, A. An Environmental Life Cycle Comparison of Various Sandwich Composite Panels for Railway Passenger Vehicle Applications. *Environmental Science and Pollution Research* **2020**, *27*, 45076–45094, doi:10.1007/s11356-020-10352-8.
947. Ozsahin, B.; Elginoz, N.; Babuna, F. Life Cycle Assessment of a Wind Farm in Turkey. *Environmental Science and Pollution Research* **2022**, *29*, 71000–71013, doi:10.1007/s11356-022-20783-0.
948. Panneerselvam, A.; Rajadurai, V.; Anguraj, B.L. Removal of Nickel from Aqueous Solution Using Synthesized IL/ZnO NPs. *Environmental Science and Pollution Research* **2020**, *27*, 29791–29803, doi:10.1007/s11356-019-07425-8.
949. Paulpandian, M.K.S. Application of Reliability Index in Statistical Model to Assess Durability of Concrete Made with Plastic Waste Aggregates Subjected to Carbonation. *Environmental Science and Pollution Research* **2022**, *29*, 17456–17463, doi:10.1007/s11356-021-16978-6.
950. Pham, M.T.N.; Hoang, A.Q.; Nghiem, X.T.; Tu, B.M.; Dao, T.N.; Vu, D.N. Residue Concentrations and Profiles of PCDD/Fs in Ash Samples from Multiple Thermal Industrial Processes in Vietnam: Formation, Emission Levels, and Risk Assessment. *Environmental Science and Pollution Research* **2019**, *26*, 17719–17730, doi:10.1007/s11356-019-05015-2.
951. Ramos, B.; Carneiro, J.G.M.; Nagamati, L.I.; Teixeira, A.C.S.C. Development of Intensified Flat-Plate Packed-Bed Solar Reactors for Heterogeneous Photocatalysis. *Environmental Science and Pollution Research* **2021**, *28*, 24023–24033, doi:10.1007/s11356-020-11806-9.

952. Rasheed, M.; Rahim, A.; Irfan-Ul-Hassan, M.; Ali, B.; Ali, N. Sulfur Concrete Made with Waste Marble and Slag Powders: 100% Recycled and Waterless Concrete. *Environmental Science and Pollution Research* **2022**, *29*, 65655–65669, doi:10.1007/s11356-022-20456-y.
953. Ren, Y.; Apergis, N.; Ma, C.; Baltas, K.; Jiang, Y.; Liu, J. FDI, Economic Growth, and Carbon Emissions of the Chinese Steel Industry: New Evidence from a 3SLS Model. *Environmental Science and Pollution Research* **2021**, *28*, 52547–52564, doi:10.1007/s11356-021-14445-w.
954. RushendraRevathy, T.D.; Ramachandran, A.; Palanivelu, K. Utilization of Steelmaking Slag for Carbon Capture and Storage with Flue Gas. *Environmental Science and Pollution Research* **2022**, *29*, 51065–51082, doi:10.1007/s11356-021-17493-4.
955. Sabour, M.R.; Derhamjani, G.; Akbari, M. Mechanical, Durability Properties, and Environmental Assessment of Geopolymer Mortars Containing Waste Foundry Sand. *Environmental Science and Pollution Research* **2022**, *29*, 24322–24333, doi:10.1007/s11356-021-17692-z.
956. Serra, D.S.; de Souza, K.C.L.; Naidu, S.T.; de Lima, J.R.; de Lima Gondim, F.; Gomes, M.D.M.; Araújo, R.S.; de Oliveira, M.L.M.; Cavalcante, F.S.Á. Lung Injury Caused by Exposure to the Gaseous Fraction of Exhaust from Biomass Combustion (Cashew Nut Shells): A Mice Model. *Environmental Science and Pollution Research* **2020**, *27*, 9568–9581, doi:10.1007/s11356-019-07576-8.
957. Shao, Y.; Li, J.; Zhang, X. The Impact of Financial Development on CO<sub>2</sub> Emissions of Global Iron and Steel Industry. *Environmental Science and Pollution Research* **2022**, *29*, 44954–44969, doi:10.1007/s11356-022-18977-7.
958. Shen, S.; Li, X.; Cheng, F.; Zha, X.; Lu, X. Review: Recent Developments of Substrates for Nitrogen and Phosphorus Removal in CWs Treating Municipal Wastewater. *Environmental Science and Pollution Research* **2020**, *27*, 29837–29855, doi:10.1007/s11356-020-08808-y.
959. Shi, M. Forecast of China's Carbon Emissions under the Background of Carbon Neutrality. *Environmental Science and Pollution Research* **2022**, *29*, 43019–43033, doi:10.1007/s11356-021-18162-2.
960. Shi, Y.; Han, B.; Zafar, M.; Wei, Z. Uncovering the Driving Forces of Carbon Dioxide Emissions in Chinese Manufacturing Industry: An Intersectoral Analysis. *Environmental Science and Pollution Research* **2019**, *26*, 31434–31448, doi:10.1007/s11356-019-06303-7.
961. Su, C.-W.; Wang, K.-H.; Tao, R.; Lobont, O.-R. The Asymmetric Effect of Air Quality on Cross-Industries' Stock Returns: Evidence from China. *Environmental Science and Pollution Research* **2019**, *26*, 31422–31433, doi:10.1007/s11356-019-06283-8.
962. Talbi, B.; Ramzan, M.; Iqbal, H.; Dogan, B. Appraisal of CO<sub>2</sub> Emission in Tunisia's Industrial Sector: A Dynamic Vector Autoregression Method. *Environmental Science and Pollution Research* **2022**, *29*, 38464–38477, doi:10.1007/s11356-022-18805-

- y.
963. Topka, P.; Dvořáková, M.; Kšířová, P.; Perekrestov, R.; Čada, M.; Balabánová, J.; Koštejn, M.; Jirátová, K.; Kovanda, F. Structured Cobalt Oxide Catalysts for VOC Abatement: The Effect of Preparation Method. *Environmental Science and Pollution Research* **2020**, *27*, 7608–7617, doi:10.1007/s11356-019-06974-2.
964. Urik, J.; Vrana, B. An Improved Design of a Passive Sampler for Polar Organic Compounds Based on Diffusion in Agarose Hydrogel. *Environmental Science and Pollution Research* **2019**, doi:10.1007/s11356-019-04843-6.
965. Victory, W. A Review on the Utilization of Waste Material in Asphalt Pavements. *Environmental Science and Pollution Research* **2022**, *29*, 27279–27282, doi:10.1007/s11356-021-18245-0.
966. Wang, H.; Zhang, P. Emission Characteristics of PM, Heavy Metals, and Dioxins in Flue Gases from Sintering Machines with Wet and Semi-Dry Flue Gas Desulfurization Systems. *Environmental Science and Pollution Research* **2021**, *28*, 46089–46099, doi:10.1007/s11356-020-11500-w.
967. Wang, L. Role of FDI and Energy Intensity in Mitigating the Environmental Pollution in the Chinese Steel Industry: Does Technological Innovation Makes a Difference? *Environmental Science and Pollution Research* **2022**, *29*, 28127–28138, doi:10.1007/s11356-021-18219-2.
968. Wang, M.; Li, Z.; Chen, L.; Liu, P.; Zhang, R.; Liu, W.; Ma, Y.; Wang, Y.; Li, X. Energy Conservation and Carbon Reduction Potential for Solid Waste in China. *Environmental Science and Pollution Research* **2020**, *27*, 42158–42167, doi:10.1007/s11356-020-10571-z.
969. Wang, W.; Zhao, S.; Tang, X.; Chen, C.; Yi, H. Stainless Steel Catalyst for Air Pollution Control: Structure, Properties, and Activity. *Environmental Science and Pollution Research* **2022**, *29*, 55367–55399, doi:10.1007/s11356-022-21079-z.
970. Wang, X.; Gao, X.; Shao, Q.; Wei, Y. Factor Decomposition and Decoupling Analysis of Air Pollutant Emissions in China's Iron and Steel Industry. *Environmental Science and Pollution Research* **2020**, *27*, 15267–15277, doi:10.1007/s11356-020-07997-w.
971. Wang, X.-Y. CO<sub>2</sub> Uptake of Slag-Blended Concrete. *Environmental Science and Pollution Research* **2021**, *28*, 48890–48904, doi:10.1007/s11356-021-14184-y.
972. Wu, J.; Sha, C.; Li, D.; Shen, C.; Tang, H.; Huang, S. Spatial and Seasonal Variation and Sources of Deposition Fluxes of Polycyclic Aromatic Hydrocarbons (PAHs) in Shanghai. *Environmental Science and Pollution Research* **2022**, *29*, 75258–75270, doi:10.1007/s11356-022-20348-1.
973. Wu, Y.; Fan, X.; Ji, Z.; Gan, M.; Zhou, H.; Li, H.; Chen, X.; Zhao, Y.; Zhang, R.; Lai, R. Investigation on the Application of By-Product Steam in Iron Ore Sintering: Performance and Function Mechanism. *Environmental Science and Pollution Research* **2022**, *29*, 62698–62709, doi:10.1007/s11356-022-20059-7.
974. Xing, Y.; Zhang, H.; Su, W.; Wang, Q.; Yu, H.; Wang, J.; Li, R.; Cai, C.; Ma, Z. The Bibliometric Analysis and Review of Dioxin in Waste Incineration and Steel

- Sintering. *Environmental Science and Pollution Research* **2019**, *26*, 35687–35703, doi:10.1007/s11356-019-06744-0.
975. Yadav, S.; Mehra, A. A Review on Ex Situ Mineral Carbonation. *Environmental Science and Pollution Research* **2021**, *28*, 12202–12231, doi:10.1007/s11356-020-12049-4.
976. Yamaguchi, S.; Hongo, T. Synthesis of Metaettringite from Blast Furnace Slag and Evaluation of Its Boron Adsorption Ability. *Environmental Science and Pollution Research* **2021**, *28*, 15070–15075, doi:10.1007/s11356-020-11028-z.
977. Zhan, M.; Ma, Y.; Chen, T.; Lin, X.; Zhang, S.; Xu, S.; Li, X.; Yan, J. PCDD/Fs Characteristics in Flue Gas and Surrounding Environment of Iron and Steel Smelting Industry. *Environmental Science and Pollution Research* **2021**, *28*, 14092–14104, doi:10.1007/s11356-020-11650-x.
978. Zhang, K.; Liu, X.; Yao, J. Identifying the Driving Forces of CO<sub>2</sub> Emissions of China's Transport Sector from Temporal and Spatial Decomposition Perspectives. *Environmental Science and Pollution Research* **2019**, *26*, 17383–17406, doi:10.1007/s11356-019-05076-3.
979. Zhang, X.; Gao, S.; Fu, Q.; Han, D.; Chen, X.; Fu, S.; Huang, X.; Cheng, J. Impact of VOCs Emission from Iron and Steel Industry on Regional O<sub>3</sub> and PM<sub>2.5</sub> Pollutions. *Environmental Science and Pollution Research* **2020**, *27*, 28853–28866, doi:10.1007/s11356-020-09218-w.
980. Zhao, R.; Li, M.; Ma, S.; Yang, T.; Jing, L. Material Selection for Landfill Leachate Piping by Using a Grey Target Decision-Making Approach. *Environmental Science and Pollution Research* **2021**, *28*, 494–502, doi:10.1007/s11356-020-10385-z.
981. Chen, Y.; Zhang, Q.; Cai, X.; Zhang, H.; Lin, H.; Zheng, C.; Guo, Z.; Hu, S.; Chen, L.; Tao, S.; et al. Rapid Increase in China's Industrial Ammonia Emissions: Evidence from Unit-Based Mapping. *Environmental Science and Technology* **2022**, *56*, 3375–3385, doi:10.1021/acs.est.1c08369.
982. Chételat, J.; Nielsen, S.G.; Auro, M.; Carpenter, D.; Mundy, L.; Thomas, P.J. Vanadium Stable Isotopes in Biota of Terrestrial and Aquatic Food Chains. *Environmental Science and Technology* **2021**, *55*, 4813–4821, doi:10.1021/acs.est.0c07509.
983. Ding, X.; Li, Q.; Wu, D.; Liang, Y.; Xu, X.; Xie, G.; Wei, Y.; Sun, H.; Zhu, C.; Fu, H.; et al. Unexpectedly Increased Particle Emissions from the Steel Industry Determined by Wet/Semidry/Dry Flue Gas Desulfurization Technologies. *Environmental Science and Technology* **2019**, *53*, 10361–10370, doi:10.1021/acs.est.9b03081.
984. Flint, I.P.; Cabrera Serrenho, A.; Lupton, R.C.; Allwood, J.M. Material Flow Analysis with Multiple Material Characteristics to Assess the Potential for Flat Steel Prompt Scrap Prevention and Diversion without Remelting. *Environmental Science and Technology* **2020**, *54*, 2459–2466, doi:10.1021/acs.est.9b03955.
985. Gao, Z.; Geng, Y.; Xiao, S.; Zhuang, M. Mapping the Global Anthropogenic Chromium Cycle: Implications for Resource Efficiency and Potential Supply Risk.

- Environmental Science and Technology* **2022**, *56*, 10904–10915, doi:10.1021/acs.est.2c00709.
986. Gast, L.; Cabrera Serrenho, A.; Allwood, J.M. What Contribution Could Industrial Symbiosis Make to Mitigating Industrial Greenhouse Gas (GHG) Emissions in Bulk Material Production? *Environmental Science and Technology* **2022**, *56*, 10269–10278, doi:10.1021/acs.est.2c01753.
987. Hong, Y.; Chen, C.-Y.; Wu, C.-C.; Bao, L.-J.; Zeng, E.Y. A Novel Personal Passive Sampler for Collecting Gaseous Phthalates. *Environmental Science and Technology* **2021**, *55*, 15961–15968, doi:10.1021/acs.est.1c06611.
988. Kleinekorte, J.; Leitl, M.; Zibunas, C.; Bardow, A. What Shall We Do with Steel Mill Off-Gas: Polygeneration Systems Minimizing Greenhouse Gas Emissions. *Environmental Science and Technology* **2022**, *56*, 13294–13304, doi:10.1021/acs.est.2c02888.
989. Lee, T.; Jung, S.; Hong, J.; Wang, C.-H.; Alessi, D.S.; Lee, S.S.; Park, Y.-K.; Kwon, E.E. Using CO<sub>2</sub> as an Oxidant in the Catalytic Pyrolysis of Peat Moss from the North Polar Region. *Environmental Science and Technology* **2020**, *54*, 6329–6343, doi:10.1021/acs.est.0c01862.
990. Li, C.; Mogollón, J.M.; Tukker, A.; Steubing, B. Environmental Impacts of Global Offshore Wind Energy Development until 2040. *Environmental Science and Technology* **2022**, *56*, 11567–11577, doi:10.1021/acs.est.2c02183.
991. Ma, W.; Lu, X.; Guan, Y.-F.; Elimelech, M. Joule-Heated Layered Double Hydroxide Sponge for Rapid Removal of Silica from Water. *Environmental Science and Technology* **2021**, *55*, 16130–16142, doi:10.1021/acs.est.1c05497.
992. Milovanoff, A.; Kim, H.C.; De Kleine, R.; Wallington, T.J.; Posen, I.D.; Maclean, H.L. A Dynamic Fleet Model of U.S Light-Duty Vehicle Lightweighting and Associated Greenhouse Gas Emissions from 2016 to 2050. *Environmental Science and Technology* **2019**, doi:10.1021/acs.est.8b04249.
993. Parikh, V.P.; Ahmadi, A.; Parekh, M.H.; Sadeghi, F.; Pol, V.G. Upcycling of Spent Lithium Cobalt Oxide Cathodes from Discarded Lithium-Ion Batteries as Solid Lubricant Additive. *Environmental Science and Technology* **2019**, *53*, 3757–3763, doi:10.1021/acs.est.8b07016.
994. Pilorgé, H.; McQueen, N.; Maynard, D.; Psarras, P.; He, J.; Rufael, T.; Wilcox, J. Cost Analysis of Carbon Capture and Sequestration of Process Emissions from the U.S. Industrial Sector. *Environmental Science and Technology* **2020**, *54*, 7524–7532, doi:10.1021/acs.est.9b07930.
995. Qiu, M.; Weng, Y.; Cao, J.; Selin, N.E.; Karplus, V.J. Improving Evaluation of Energy Policies with Multiple Goals: Comparing Ex Ante and Ex Post Approaches. *Environmental Science and Technology* **2020**, *54*, 15584–15593, doi:10.1021/acs.est.0c01381.
996. Ryan, N.A.; Miller, S.A.; Skerlos, S.J.; Cooper, D.R. Reducing CO<sub>2</sub> Emissions from U.S. Steel Consumption by 70% by 2050. *Environmental Science and Technology* **2020**, *54*, 14598–14608, doi:10.1021/acs.est.0c04321.

997. Wang, K.; Martinez, A.F.; Simonelli, L.; Madé, B.; Hénocq, P.; Ma, B.; Charlet, L. Redox Interaction between Selenite and Mackinawite in Cement Pore Water. *Environmental Science and Technology* **2022**, *56*, 5602–5610, doi:10.1021/acs.est.2c00901.
998. Wang, N.; Ernle, L.; Bekö, G.; Wargocki, P.; Williams, J. Emission Rates of Volatile Organic Compounds from Humans. *Environmental Science and Technology* **2022**, *56*, 4838–4848, doi:10.1021/acs.est.1c08764.
999. Weng, C.; Chuang, Y.-H.; Davey, B.; Mitch, W.A. Reductive Electrochemical Activation of Hydrogen Peroxide as an Advanced Oxidation Process for Treatment of Reverse Osmosis Permeate during Potable Reuse. *Environmental Science and Technology* **2020**, *54*, 12593–12601, doi:10.1021/acs.est.0c02144.
1000. Zang, G.; Sun, P.; Yoo, E.; Elgowainy, A.; Bafana, A.; Lee, U.; Wang, M.; Supekar, S. Synthetic Methanol/Fischer-Tropsch Fuel Production Capacity, Cost, and Carbon Intensity Utilizing CO<sub>2</sub> from Industrial and Power Plants in the United States. *Environmental Science and Technology* **2021**, *55*, 7595–7604, doi:10.1021/acs.est.0c08674.
1001. Zhu, Y.; Syndergaard, K.; Cooper, D.R. Mapping the Annual Flow of Steel in the United States. *Environmental Science and Technology* **2019**, doi:10.1021/acs.est.9b01016.
1002. Li, S.; Zhang, B.; Wu, D.; Li, Z.; Chu, S.-Q.; Ding, X.; Tang, X.; Chen, J.; Li, Q. Magnetic Particles Unintentionally Emitted from Anthropogenic Sources: Iron and Steel Plants. *Environmental Science and Technology Letters* **2021**, *8*, 295–300, doi:10.1021/acs.estlett.1c00164.
1003. Cheng, J.; Zheng, D.; Dai, C.; Xu, R.; Liu, N.; Yu, G.; Wang, N.; Chen, B. Constructing Active Copper Species in Cu-Zeolites for Coal-Gas-SCR and Elucidating the Synergistic Catalytic Function of CuO and Cu<sup>2+</sup> Ion Species. *Environmental Science: Nano* **2022**, *9*, 2372–2387, doi:10.1039/d2en00269h.
1004. Zhu, L.; Li, H.; Yin, Y.; Cui, Z.; Ma, C.; Li, X.; Xue, Q. One-Step Synthesis of a Robust and Anti-Oil-Fouling Biomimetic Cactus-like Hierarchical Architecture for Highly Efficient Oil/Water Separation. *Environmental Science: Nano* **2020**, *7*, 903–911, doi:10.1039/c9en01140d.
1005. Chang, L.; Chong, W.T.; Wang, X.; Pei, F.; Zhang, X.; Wang, T.; Wang, C.; Pan, S. Recent Progress in Research on PM<sub>2.5</sub> in Subways. *Environmental Science: Processes and Impacts* **2021**, *23*, 642–663, doi:10.1039/d1em00002k.
1006. Chin, K.; Laguerre, A.; Ramasubramanian, P.; Pleshakov, D.; Stephens, B.; Gall, E.T. Emerging Investigator Series: Primary Emissions, Ozone Reactivity, and Byproduct Emissions from Building Insulation Materials. *Environmental Science: Processes and Impacts* **2019**, *21*, 1255–1267, doi:10.1039/c9em00024k.
1007. Lechthaler, S.; Esser, V.; Schüttrumpf, H.; Stauch, G. Why Analysing Microplastics in Floodplains Matters: Application in a Sedimentary Context. *Environmental Science: Processes and Impacts* **2021**, *23*, 117–131, doi:10.1039/d0em00431f.
1008. Li, X.; Li, B.; Guo, L.; Feng, R.; Fang, X. Research Progresses on VOCs Emission



- Investigations via Surface and Satellite Observations in China. *Environmental Science: Processes and Impacts* **2022**, doi:10.1039/d2em00175f.
1009. Pradeep Kumar, P.; Santos, D.A.; Braham, E.J.; Sellers, D.G.; Banerjee, S.; Dixit, M.K. Punching above Its Weight: Life Cycle Energy Accounting and Environmental Assessment of Vanadium Microalloying in Reinforcement Bar Steel. *Environmental Science: Processes and Impacts* **2021**, *23*, 275–290, doi:10.1039/d0em00424c.
1010. Schroeder, T.; Bond, D.; Foley, J. PFAS Soil and Groundwater Contamination: Via Industrial Airborne Emission and Land Deposition in SW Vermont and Eastern New York State, USA. *Environmental Science: Processes and Impacts* **2021**, *23*, 291–301, doi:10.1039/d0em00427h.
1011. Xu, H.M.; He, K.L.; Feng, R.; Shen, Z.X.; Cao, J.J.; Liu, S.X.; Ho, K.F.; Huang, R.-J.; Guinot, B.; Wang, Q.Y.; et al. Metallic Elements and Pb Isotopes in PM<sub>2.5</sub> in Three Chinese Typical Megacities: Spatial Distribution and Source Apportionment. *Environmental Science: Processes and Impacts* **2020**, *22*, 1718–1730, doi:10.1039/d0em00174k.
1012. Liang, D.; Ji, M.; Zhu, S.; Chen, Y.; Wang, Z.; Liu, Y.; Khan, A.; Ri, Y.; Yu, H.; Huo, M. A Novel Fe Recycling Method from Pickling Wastewater Producing a KFeS<sub>2</sub> Whisker for Electroplating Wastewater Treatment. *Environmental Science: Water Research and Technology* **2021**, *7*, 1480–1491, doi:10.1039/d1ew00085c.
1013. Agyeman, P.C.; John, K.; Kebonye, N.M.; Borůvka, L.; Vašát, R.; Drábek, O.; Němeček, K. Human Health Risk Exposure and Ecological Risk Assessment of Potentially Toxic Element Pollution in Agricultural Soils in the District of Frydek Mistek, Czech Republic: A Sample Location Approach. *Environmental Sciences Europe* **2021**, *33*, doi:10.1186/s12302-021-00577-w.
1014. Al-Asmakh, M.; Majdalawieh, A.; Abdullah, A.; Younes, N.; Da'as, S.; Radwan, A.; Sliem, M.; Ech-Cherif, H.; Pintus, G.; Nasrallah, G. AEO-7 Surfactant Is “Super Toxic” and Induces Severe Cardiac, Liver and Locomotion Damage in Zebrafish Embryos. *Environmental Sciences Europe* **2020**, *32*, doi:10.1186/s12302-020-00429-z.
1015. Petrovský, E.; Kapička, A.; Grison, H.; Kotlík, B.; Miturová, H. Negative Correlation between Concentration of Iron Oxides and Particulate Matter in Atmospheric Dust: Case Study at Industrial Site during Smoggy Period. *Environmental Sciences Europe* **2020**, *32*, doi:10.1186/s12302-020-00420-8.
1016. Sharma, B.; Bharat, G.; Sebkova, K.; Scheringer, M. Implementation of the Minamata Convention to Manage Mercury Pollution in India: Challenges and Opportunities. *Environmental Sciences Europe* **2019**, *31*, doi:10.1186/s12302-019-0280-3.
1017. Small, J.A.; van Hoek, C.J.G.; Schollbach, K.; Moosavi-Khoonsari, E.; van der Does, F.J.L.; Melzer, S.; de Jong, T.P.R.; de Bie, T.; Versfeld, R.A.; de Roo, M.; et al. A Method for Analysis of Nuisance Dust from Integrated Steel Works: Chemical and Mineralogical Characteristics of Contributing Sources. *Environmental Sciences Europe* **2020**, *32*, doi:10.1186/s12302-020-00414-6.

1018. Guo, Y.; Luo, L.; Zheng, Y.; Zhu, T.; Ye, M. Influence of Pollutants' Control Facilities on PM<sub>2.5</sub> Profiles Emitted from an Iron and Steel Plant. *Environmental Technology (United Kingdom)* **2020**, *41*, 521–528, doi:10.1080/09593330.2018.1504123.
1019. Li, X.; Sun, W.; Zhao, L.; Cai, J. Emission Characterization of Particulate Matter in the Ironmaking Process. *Environmental Technology (United Kingdom)* **2019**, *40*, 282–292, doi:10.1080/09593330.2017.1387180.
1020. Martins, T.R.; Mrozinski, N.S.; Bertuol, D.A.; Tanabe, E.H. Recovery of Copper and Aluminium from Coaxial Cable Wastes Using Comparative Mechanical Processes Analysis. *Environmental Technology (United Kingdom)* **2021**, *42*, 3205–3217, doi:10.1080/09593330.2020.1725141.
1021. Mensah, M.; Das, A. Metallurgical Resource Recovery from Waste Steelmaking Slag from Electric Arc Furnace. *Environmental Technology (United Kingdom)* **2021**, doi:10.1080/09593330.2021.1968957.
1022. Park, S.-J.; Kang, K.; Lee, C.-G.; Choi, J.-W. Remediation of Metal-Contaminated Marine Sediments Using Active Capping with Limestone, Steel Slag, and Activated Carbon: A Laboratory Experiment. *Environmental Technology (United Kingdom)* **2019**, *40*, 3479–3491, doi:10.1080/09593330.2018.1478886.
1023. Sellner, B.M.; Hua, G.; Ahiablame, L.M.; Trooien, T.P.; Hay, C.H.; Kjaersgaard, J. Evaluation of Industrial By-Products and Natural Minerals for Phosphate Adsorption from Subsurface Drainage. *Environmental Technology (United Kingdom)* **2019**, *40*, 756–767, doi:10.1080/09593330.2017.1407364.
1024. Su, J.; Jia, Y.; Hou, R.; Huang, Y.; Shen, K.; Hao, Z. Preparation and Characterization of Graphene Oxide/O-Carboxymethyl Chitosan (GO/CMC) Composite and Its Unsymmetrical Dimethylhydrazine (UDMH) Adsorption Performance from Wastewater. *Environmental Technology (United Kingdom)* **2021**, doi:10.1080/09593330.2021.2005688.
1025. Sun, S.; Yang, K.; Liu, C.; Tu, G.; Xiao, F. Recovery of Nickel and Preparation of Ferronickel Alloy from Spent Petroleum Catalyst via Cooperative Smelting–Vitrification Process with Coal Fly Ash. *Environmental Technology (United Kingdom)* **2021**, doi:10.1080/09593330.2021.2002421.
1026. Wu, L.-J.; Zhang, Z.-Y.; Zhang, F.-S. Degradation of Organic Compounds in Hypersaline Wastewater Concentrate by a Supercritical Oxidation Approach. *Environmental Technology (United Kingdom)* **2021**, doi:10.1080/09593330.2021.2008517.
1027. Kang, D.; Han, J. Environmental Analysis of Methanol Production from Steel-Making Offgas. *Environmental Technology and Innovation* **2022**, *28*, doi:10.1016/j.eti.2022.102694.
1028. Kumari, U.; Biswas, S.; Meikap, B.C. Defluoridation Characteristics of a Novel Adsorbent Developed from Ferroalloy Electric Arc Furnace Slag: Batch, Column Study and Treatment of Industrial Wastewater. *Environmental Technology and Innovation* **2020**, *18*, doi:10.1016/j.eti.2020.100782.
1029. Yadav, V.K.; Yadav, K.K.; Gnanamoorthy, G.; Choudhary, N.; Khan, S.H.; Gupta,

- N.; Kamyab, H.; Bach, Q.-V. A Novel Synthesis and Characterization of Polyhedral Shaped Amorphous Iron Oxide Nanoparticles from Incense Sticks Ash Waste. *Environmental Technology and Innovation* **2020**, *20*, doi:10.1016/j.eti.2020.101089.
1030. Zhang, L.; Li, R.; Zhou, L.; Li, Q.; Dong, F.; Yan, Y. Recycling the Steel Pickling Waste Liquor to Produce a Low-Cost Material for Immobilization of Heavy Metal(Loid)s. *Environmental Technology and Innovation* **2021**, *24*, doi:10.1016/j.eti.2021.102001.
1031. Zhang, Y.; Zeng, H.; Dong, X.; Huang, H.; Zheng, Q.; Dai, Z.; Zhang, Z.; Li, Z.; Feng, Q.; Xiong, S.; et al. In Situ Cadmium Removal from Paddy Soils by a Reusable Remediation Device and Its Health Risk Assessment in Rice. *Environmental Technology and Innovation* **2021**, *23*, doi:10.1016/j.eti.2021.101713.
1032. Foekema, E.M.; Tamis, J.E.; Blanco, A.; van der Weide, B.; Sonneveld, C.; Kleissen, F.; van den Heuvel-Greve, M.J. Leaching of Metals from Steel Slag and Their Ecological Effects on a Marine Ecosystem: Validating Field Data with Mesocosm Observations. *Environmental Toxicology and Chemistry* **2021**, *40*, 2499–2509, doi:10.1002/etc.5132.
1033. Nfor, B.; Fai, P.B.A.; Tamungang, S.A.; Fobil, J.N.; Basu, N. Soil Contamination and Bioaccumulation of Heavy Metals by a Tropical Earthworm Species (*Alma Nilotica*) at Informal E-Waste Recycling Sites in Douala, Cameroon. *Environmental Toxicology and Chemistry* **2022**, *41*, 356–368, doi:10.1002/etc.5264.
1034. Thébault, J.; Bustamante, P.; Massaro, M.; Taylor, G.; Quillfeldt, P. Influence of Species-Specific Feeding Ecology on Mercury Concentrations in Seabirds Breeding on the Chatham Islands, New Zealand. *Environmental Toxicology and Chemistry* **2021**, *40*, 454–472, doi:10.1002/etc.4933.
1035. Bai, Y.; Long, C.; Hu, G.; Zhou, D.; Gao, X.; Chen, Z.; Wang, T.; Yu, S.; Han, Y.; Yan, L. Association of Blood Chromium and Rare Earth Elements with the Risk of DNA Damage in Chromate Exposed Population. *Environmental Toxicology and Pharmacology* **2019**, *72*, doi:10.1016/j.etap.2019.103237.
1036. Jirajariyavech, I.; Kunnoot, S.; Iemthanon, K. Accounting for External Costs in the Allocation of Carbon Emissions Quotas for Selected Industries in Thailand. *EnvironmentAsia* **2020**, *13*, 14–25, doi:10.14456/ea.2020.2.
1037. Assaad, J.J.; Khatib, J.M.; Ghanem, R. Bond to Bar Reinforcement of PET-Modified Concrete Containing Natural or Recycled Coarse Aggregates. *Environments - MDPI* **2022**, *9*, doi:10.3390/environments9010008.
1038. Pouranian, M.R.; Shishehbor, M. Sustainability Assessment of Green Asphalt Mixtures: A Review. *Environments - MDPI* **2019**, *6*, doi:10.3390/environments6060073.
1039. Olise, F.; Ajayii, O.; Ezeh, G.; Owoade, O. Variations in Elemental and Radiometric Concentrations of Soils around a Mining Site in Southwestern Nigeria. *EQA-INTERNATIONAL JOURNAL OF ENVIRONMENTAL QUALITY* **2020**, *39*, 20–31, doi:10.6092/issn.2281-4485/10260.

1040. Elter, Z.; Grape, S. A Methodology to Identify Partial Defects in Spent Nuclear Fuel Using Gamma Spectroscopy Data. *ESARDA Bulletin* **2020**, *2020*, 22–31, doi:10.3011/ESARDA.IJNSNP.2020.9.
1041. Al-Hadithi, A.I.; Abbas, M.A. Innovative Technique of Using Carbon Fibre Reinforced Polymer Strips for Shear Reinforcement of Reinforced Concrete Beams with Waste Plastic Fibres. *European Journal of Environmental and Civil Engineering* **2021**, *25*, 516–537, doi:10.1080/19648189.2018.1532820.
1042. Al-Sodani, K.A.A.; Maslehuddin, M.; Al-Amoudi, O.S.B.; Saleh, T.A.; Shameem, M. Performance of Corrosion Inhibitors in Cracked and Uncracked Silica Fume Cement Concrete Beams. *European Journal of Environmental and Civil Engineering* **2020**, *24*, 1573–1588, doi:10.1080/19648189.2018.1475306.
1043. Ali, B.; Farooq, M.A.; Kurda, R.; Alyousef, R.; Noman, M.; Alabduljabbar, H. Effect of Type and Volume Fraction of Recycled-Tire Steel Fiber on Durability and Mechanical Properties of Concrete. *European Journal of Environmental and Civil Engineering* **2022**, doi:10.1080/19648189.2022.2103590.
1044. Frhaan, W.K.M.; Abu Bakar, B.H.; Hilal, N.; Al-Hadithi, A.I. Relation between Rheological and Mechanical Properties on Behaviour of Self-Compacting Concrete (SCC) Containing Recycled Plastic Fibres: A Review. *European Journal of Environmental and Civil Engineering* **2022**, *26*, 4761–4793, doi:10.1080/19648189.2020.1868344.
1045. Goyal, P.; Sharma, S.; Kwatra, N. Acoustic Emission Monitoring of Steel Fiber Reinforced Beams under Simultaneous Corrosion and Sustained Loading. *European Journal of Environmental and Civil Engineering* **2022**, doi:10.1080/19648189.2022.2087743.
1046. Hama, S.M. Behavior of Concrete Incorporating Waste Plastic as Fine Aggregate Subjected to Compression, Impact Load and Bond Resistance. *European Journal of Environmental and Civil Engineering* **2022**, *26*, 3372–3386, doi:10.1080/19648189.2020.1798287.
1047. Jebur, A.A.; Atherton, W.; Al Khaddar, R.M.; Loffill, E. Artificial Neural Network (ANN) Approach for Modelling of Pile Settlement of Open-Ended Steel Piles Subjected to Compression Load. *European Journal of Environmental and Civil Engineering* **2021**, *25*, 429–451, doi:10.1080/19648189.2018.1531269.
1048. Kuranlı, Ö.F.; Uysal, M.; Abbas, M.T.; Çoşgun, T.; Niş, A.; Aygörmmez, Y.; Canpolat, O.; Al-mashhadani, M.M. Mechanical and Durability Properties of Steel, Polypropylene and Polyamide Fiber Reinforced Slag-Based Alkali-Activated Concrete. *European Journal of Environmental and Civil Engineering* **2022**, doi:10.1080/19648189.2022.2031302.
1049. Liu, T.-J.; Chen, S.-W.; Lin, P.-Q.; Liu, H.-Y. Failure Mechanism and Strengthening Effect of Shield Tunnel Lining Reinforced by Steel Plates with Corbels. *European Journal of Environmental and Civil Engineering* **2022**, *26*, 1603–1621, doi:10.1080/19648189.2020.1717636.
1050. Manjunath, R.; Narasimhan, M.C.; Kumar, S. Effects of Fiber Addition on

- Performance of High-Performance Alkali Activated Slag Concrete Mixes: An Experimental Evaluation. *European Journal of Environmental and Civil Engineering* **2022**, *26*, 2934–2949, doi:10.1080/19648189.2020.1776771.
1051. Neira Medina, A.L.; Abellán García, J.; Torres Castellanos, N. Flexural Behavior of Environmentally Friendly Ultra-High-Performance Concrete with Locally Available Low-Cost Synthetic Fibers. *European Journal of Environmental and Civil Engineering* **2021**, doi:10.1080/19648189.2021.1938686.
1052. Niş, A.; Eren, N.A.; Çevik, A. Effects of Recycled Tyre Rubber and Steel Fibre on the Impact Resistance of Slag-Based Self-Compacting Alkali-Activated Concrete. *European Journal of Environmental and Civil Engineering* **2022**, doi:10.1080/19648189.2022.2052967.
1053. Sadaoui, O.; Bahar, R. Field Measurements and Back Calculations of Settlements of Structures Founded on Improved Soft Soils by Stone Columns. *European Journal of Environmental and Civil Engineering* **2019**, *23*, 85–111, doi:10.1080/19648189.2016.1271358.
1054. Tahenni, T.; Chemrouk, M.; Lecompte, T. Steel Fibres Effects on the Flexural Cracking Behaviour of Reinforced High Strength Concrete Beams with Particular Reference to the Major Design Codes Crack Width Models. *European Journal of Environmental and Civil Engineering* **2020**, *24*, 1709–1728, doi:10.1080/19648189.2018.1482790.
1055. Tao, X.; Zhang, J.; Zhang, M.; Cao, W. Seismic Performance of Semi-Precast High-Strength Recycled Concrete Columns with Ultra-High-Strength Steel Bar. *European Journal of Environmental and Civil Engineering* **2022**, doi:10.1080/19648189.2022.2066185.
1056. Sunaryo, S.; Aidane, M.A. Development Strategy of Eco Ship Recycling Industrial Park. *Evergreen* **2022**, *9*, 524–530, doi:10.5109/4794183.
1057. Gardner, T.; Paolinelli, L.D.; Nesic, S. Study of Water Wetting in Oil-Water Flow in a Small-Scale Annular Flume. *Experimental Thermal and Fluid Science* **2019**, *102*, 506–516, doi:10.1016/j.expthermflusci.2018.12.010.
1058. Running, C.L.; Rataczak, J.A.; Zaccara, M.; Cardone, G.; Juliano, T.J. A Wrap-Film Technique for Infrared Thermography Heat-Transfer Measurements in High-Speed Wind Tunnels. *Experimental Thermal and Fluid Science* **2022**, *135*, doi:10.1016/j.expthermflusci.2022.110604.
1059. Yick, J.L.; Wisniewski, C.; Diggle, J.; Patil, J.G. Eradication of the Invasive Common Carp, *Cyprinus Carpio* from a Large Lake: Lessons and Insights from the Tasmanian Experience. *Fishes* **2021**, *6*, doi:10.3390/fishes6010006.
1060. Raoul, T.T. Designing and Piloting a Household Filter for the Peri-Urban Population of Douala (Cameroon). *FOG - Freiberg Online Geoscience* **2021**, *61*, 1–89.
1061. Chen, J.; Dong, X.; Zhang, Q.; Ding, S. Migration of Titanium Dioxide from PET/TiO<sub>2</sub> Composite Film for Polymer-Laminated Steel. *Food Additives and Contaminants - Part A Chemistry, Analysis, Control, Exposure and Risk Assessment* **2019**, *36*, 483–491, doi:10.1080/19440049.2019.1577992.

1062. Qiu, K.; Yang, D.; Zhu, X.; Sui, H.; Wu, G. Survey of Six Metal Contaminants and Impurities and Eleven Metals and Alloy Components Released from Stainless-Steel Sheets on the Chinese Market. *Food Additives and Contaminants - Part A Chemistry, Analysis, Control, Exposure and Risk Assessment* **2021**, *38*, 2091–2101, doi:10.1080/19440049.2021.1964700.
1063. Jones, S.L.; Gibson, K.E. Characterization of Polyurethane Foam Environmental Monitoring Tools for the Recovery and Release of Viruses. *Food and Environmental Virology* **2020**, *12*, 158–166, doi:10.1007/s12560-020-09421-5.
1064. Rajiuddin, S.M.; Vigre, H.; Musavian, H.S.; Kohle, S.; Krebs, N.; Hansen, T.B.; Gantzer, C.; Schultz, A.C. Inactivation of Hepatitis A Virus and Murine Norovirus on Surfaces of Plastic, Steel and Raspberries Using Steam-Ultrasound Treatment. *Food and Environmental Virology* **2020**, *12*, 295–309, doi:10.1007/s12560-020-09441-1.
1065. Anderson, C.T.; Dietz, S.L.; Pokswinski, S.M.; Jenkins, A.M.; Kaeser, M.J.; Hiers, J.K.; Pelc, B.D. Traditional Field Metrics and Terrestrial LiDAR Predict Plant Richness in Southern Pine Forests. *Forest Ecology and Management* **2021**, *491*, doi:10.1016/j.foreco.2021.119118.
1066. Bogdanovich, E.; Perez-Priego, O.; El-Madany, T.S.; Guderle, M.; Pacheco-Labrador, J.; Levick, S.R.; Moreno, G.; Carrara, A.; Pilar Martín, M.; Migliavacca, M. Using Terrestrial Laser Scanning for Characterizing Tree Structural Parameters and Their Changes under Different Management in a Mediterranean Open Woodland. *Forest Ecology and Management* **2021**, *486*, doi:10.1016/j.foreco.2021.118945.
1067. Carr, A.; Weatherall, A.; Jones, G. The Effects of Thinning Management on Bats and Their Insect Prey in Temperate Broadleaved Woodland. *Forest Ecology and Management* **2020**, *457*, doi:10.1016/j.foreco.2019.117682.
1068. Jacobs, M.; Rais, A.; Pretzsch, H. How Drought Stress Becomes Visible upon Detecting Tree Shape Using Terrestrial Laser Scanning (TLS). *Forest Ecology and Management* **2021**, *489*, doi:10.1016/j.foreco.2021.118975.
1069. Krishna Moorthy, S.M.; Raunonen, P.; Van den Bulcke, J.; Calders, K.; Verbeeck, H. Terrestrial Laser Scanning for Non-Destructive Estimates of Liana Stem Biomass. *Forest Ecology and Management* **2020**, *456*, doi:10.1016/j.foreco.2019.117751.
1070. Nambiar, E.K.S. Re-Imagining Forestry and Wood Business: Pathways to Rural Development, Poverty Alleviation and Climate Change Mitigation in the Tropics. *Forest Ecology and Management* **2019**, *448*, 160–173, doi:10.1016/j.foreco.2019.06.014.
1071. Yrttimaa, T.; Luoma, V.; Saarinen, N.; Kankare, V.; Juntila, S.; Holopainen, M.; Hyypä, J.; Vastaranta, M. Exploring Tree Growth Allometry Using Two-Date Terrestrial Laser Scanning. *Forest Ecology and Management* **2022**, *518*, doi:10.1016/j.foreco.2022.120303.
1072. Chianucci, F.; Puletti, N.; Grotti, M.; Ferrara, C.; Giorcelli, A.; Coaloa, D.; Tattoni, C. Nondestructive Tree Stem and Crown Volume Allometry in Hybrid Poplar Plantations Derived from Terrestrial Laser Scanning. *Forest Science* **2020**, *66*, 737–

- 746, doi:10.1093/forsci/fxaa021.
1073. Bayrak, O.U.; Abret, N.E. A Multi-Criteria Decision for Determining the Appropriate Junction Design Type: AHP Approach with Microsimulation. *Fresenius Environmental Bulletin* **2019**, *28*, 7183–7195.
1074. Chen, J.; Zhang, H.; Zhao, G. COMPARISON OF HYDROGEN - AND CARBON METALLURGY CONSIDERING COST AND CARBON EMISSION. *Fresenius Environmental Bulletin* **2022**, *31*, 8077–8087.
1075. Chen, X.; Wang, L.; Huang, Z. STUDY ON CORROSION MECHANISM AND CONTROL TECHNOLOGY OF OIL AND GAS GATHERING AND TRANSPORTATION PIPELINE. *Fresenius Environmental Bulletin* **2021**, *30*, 1021–1029.
1076. Gao, F.; Yu, C.; Huang, H.; Zhao, L. Recycling Utilization of Steel Slag as Adsorbent in Wastewater Treatment. *Fresenius Environmental Bulletin* **2021**, *30*, 2625–2630.
1077. Li, D. Research on Sustainable Development Planning of Low-Carbon City in Xi'an, China. *Fresenius Environmental Bulletin* **2021**, *30*, 511–520.
1078. Mert, T.; Celebi, U.; Bilgili, L.; Ekinci, S. SHIPYARD WELDING EMISSION ESTIMATION FOR DIFFERENT ELECTRODE AND SHIP TYPES. *Fresenius Environmental Bulletin* **2019**, *28*, 891–894.
1079. Qu, L. Study on Advanced Treatment of High-Salt Wastewater in Steel Plant Based on Membrane Combination Process. *Fresenius Environmental Bulletin* **2020**, *29*, 1590–1599.
1080. Sahin, U.A.; Kantarci, D.; Onat, B.; Aydin, S. Dew and Rainwater Chemistry in Industrial and Agricultural Areas of Turkey. *Fresenius Environmental Bulletin* **2019**, *28*, 6503–6515.
1081. Wang, Q.; Guo, X.; Li, M. A REVIEW ON THE APPLICATION OF CARBONATION TECHNOLOGY FOR STEEL SLAG. *Fresenius Environmental Bulletin* **2021**, *30*, 10411–10426.
1082. Xin, Y.; Tian, S. Experimental Study on the Local Corrosion Behavior of Gathering and Transportation System Based on Electrochemical Noise Technology. *Fresenius Environmental Bulletin* **2020**, *29*, 11466–11473.
1083. Xiong, X.; Yang, J. ANALYSIS OF THE IMPACT OF ENERGY SAVING AND EMISSION REDUCTION ON ENTERPRISE NAMAGEMENT PERFORMANCE UNDER THE ENVIRONMENT OF SUSTAINABLE DEVELOPMENT. *Fresenius Environmental Bulletin* **2021**, *30*, 11878–11885.
1084. Yin, Z.; Wang, P.; Ning, X. Risk Assessment of Seismic Fragility of Extra-Long-Span Bridge Structures under Random Earthquake. *Fresenius Environmental Bulletin* **2020**, *29*, 986–993.
1085. Zhu, C.; Sha, B.; Yue, Z.; Zhou, Y.; Yuan, K.; Zhou, Z. RESEARCH ON THE MECHANISM OF RECYCLED COARSE AGGREGATE'S INFLUENCE ON THE DURABILITY OF CONCRETE STRUCTURE. *Fresenius Environmental Bulletin* **2022**, *31*, 5659–5668.

1086. Beaumont, M.L.L. Making Direct Air Capture Affordable; Technology, Market and Regulatory Approaches. *Frontiers in Climate* **2022**, *4*, doi:10.3389/fclim.2022.756013.
1087. Rosental, M.; Fröhlich, T.; Liebich, A. Life Cycle Assessment of Carbon Capture and Utilization for the Production of Large Volume Organic Chemicals. *Frontiers in Climate* **2020**, *2*, doi:10.3389/fclim.2020.586199.
1088. Zhu, K.; Liu, Q.; Xiong, X.; Zhang, Y.; Wang, M.; Liu, H. Carbon Footprint and Embodied Carbon Emission Transfer Network Obtained Using the Multi-Regional Input-Output Model and Social Network Analysis Method: A Case of the Hanjiang River Basin, China. *Frontiers in Ecology and Evolution* **2022**, *10*, doi:10.3389/fevo.2022.941520.
1089. Bakry, M.; Li, J.; Zeng, X. Evaluation of Global Niobium Flow Modeling and Its Market Forecasting. *Frontiers in Energy* **2022**, doi:10.1007/s11708-022-0823-y.
1090. Wang, W.; Li, B.; Yao, X.; Lyu, J.; Ni, W. Air Pollutant Control and Strategy in Coal-Fired Power Industry for Promotion of China's Emission Reduction. *Frontiers in Energy* **2019**, *13*, 307–316, doi:10.1007/s11708-019-0620-4.
1091. Agostini, A.; Carbone, C.; Lanchi, M.; Miliozzi, A.; Misceo, M.; Russo, V. Environmental Impacts of a Solar Dish Coupled With a Micro-Gas Turbine for Power Generation. *Frontiers in Energy Research* **2021**, *9*, doi:10.3389/fenrg.2021.776821.
1092. Baciocchi, R.; Costa, G. CO<sub>2</sub> Utilization and Long-Term Storage in Useful Mineral Products by Carbonation of Alkaline Feedstocks. *Frontiers in Energy Research* **2021**, *9*, doi:10.3389/fenrg.2021.592600.
1093. Collis, J.; Schomäcker, R. Determining the Production and Transport Cost for H<sub>2</sub> on a Global Scale. *Frontiers in Energy Research* **2022**, *10*, doi:10.3389/fenrg.2022.909298.
1094. Collis, J.; Strunge, T.; Steubing, B.; Zimmermann, A.; Schomäcker, R. Deriving Economic Potential and GHG Emissions of Steel Mill Gas for Chemical Industry. *Frontiers in Energy Research* **2021**, *9*, doi:10.3389/fenrg.2021.642162.
1095. Güleç, F.; Meredith, W.; Snape, C.E. Progress in the CO<sub>2</sub> Capture Technologies for Fluid Catalytic Cracking (FCC) Units—A Review. *Frontiers in Energy Research* **2020**, *8*, doi:10.3389/fenrg.2020.00062.
1096. Hills, C.; Tripathi, N.; Carey, P. Mineralization Technology for Carbon Capture, Utilization, and Storage. *Frontiers in Energy Research* **2020**, *8*, doi:10.3389/fenrg.2020.00142.
1097. Johnsson, F.; Normann, F.; Svensson, E. Marginal Abatement Cost Curve of Industrial CO<sub>2</sub> Capture and Storage – A Swedish Case Study. *Frontiers in Energy Research* **2020**, *8*, doi:10.3389/fenrg.2020.00175.
1098. Milano, J.; Umar, H.; Shamsuddin, A.H.; Silitonga, A.S.; Irfan, O.M.; Sebayang, A.H.; Fattah, I.M.R.; Mofijur, M. Experimental Study of the Corrosiveness of Ternary Blends of Biodiesel Fuel. *Frontiers in Energy Research* **2021**, *9*, doi:10.3389/fenrg.2021.778801.



1099. Sun, X. Supply Chain Risks of Critical Metals: Sources, Propagation, and Responses. *Frontiers in Energy Research* **2022**, *10*, doi:10.3389/fenrg.2022.957884.
1100. Wich, T.; Lueke, W.; Deerberg, G.; Oles, M. Carbon2Chem®-CCU as a Step Toward a Circular Economy. *Frontiers in Energy Research* **2020**, *7*, doi:10.3389/fenrg.2019.00162.
1101. Zheng, L.; Chen, G.; Liu, L.; Hu, Y. Tracing of Lithium Supply and Demand Bottleneck in China's New Energy Vehicle Industry-Based on the Chart of Lithium Flow. *Frontiers in Energy Research* **2022**, *10*, doi:10.3389/fenrg.2022.992617.
1102. Ge, T.; Lv, X.; Ma, L.; Shen, X. Can Industrial Relocation Reduce Air Pollution? Evidence From a Quasi-Natural Experiment in China. *Frontiers in Environmental Science* **2022**, *10*, doi:10.3389/fenvs.2022.910668.
1103. Lu, P.; Hamori, S.; Tian, S. Policy Effect of the "Blue Sky Plan" on Air Pollution, ESG Investment, and Financial Performance of China's Steel Industry. *Frontiers in Environmental Science* **2022**, *10*, doi:10.3389/fenvs.2022.955906.
1104. Steinman, A.D.; Hassett, M.; Oudsema, M.; Penn, C.J. Reduction of Phosphorus Using Electric Arc Furnace Slag Filters in the Macatawa Watershed (Michigan). *Frontiers in Environmental Science* **2022**, *10*, doi:10.3389/fenvs.2022.863137.
1105. Starck, M.; Heidel, A.; Brischke, C.; Militz, H. Incising and Double Impregnation of Beech Sleepers—Investigation of an Alternative Preservation System for Wooden Railway Sleepers. *Frontiers in Forests and Global Change* **2022**, *5*, doi:10.3389/ffgc.2022.814049.
1106. Kim, Y.S.; Jang, C.J.; Noh, J.H.; Kim, K.-T.; Kwon, J.-I.; Min, Y.; Jeong, J.; Lee, J.; Min, I.-K.; Shim, J.-S.; et al. A Yellow Sea Monitoring Platform and Its Scientific Applications. *Frontiers in Marine Science* **2019**, *6*, doi:10.3389/fmars.2019.00601.
1107. Bangar, V.; Mishra, A.K.; Jangid, M.; Rajput, P. Elemental Characteristics and Source-Appportionment of PM<sub>2.5</sub> During the Post-Monsoon Season in Delhi, India. *Frontiers in Sustainable Cities* **2021**, *3*, doi:10.3389/frsc.2021.648551.
1108. Brandão, Y.B.; Dias, F.F.S.; Oliveira, D.C.; Zaidan, L.E.M.C.; Teodosio, J.R.; Oliveira, J.G.C.; Benachour, M. Unconventional Advanced Oxidation Technique: Evaporation Liquid Rate and Phenolic Compounds Degradation Evaluation and Modelling/Optimization Process with CFD, RSM and ANNs. *Fuel* **2021**, *300*, doi:10.1016/j.fuel.2021.120967.
1109. Cardarelli, A.; De Santis, M.; Cirilli, F.; Barbanera, M. Computational Fluid Dynamics Analysis of Biochar Combustion in a Simulated Ironmaking Electric Arc Furnace. *Fuel* **2022**, *328*, doi:10.1016/j.fuel.2022.125267.
1110. Di Lorenzo, M.; Brequigny, P.; Foucher, F.; Mounaïm-Rousselle, C. Validation of TRF-E as Gasoline Surrogate through an Experimental Laminar Burning Speed Investigation. *Fuel* **2019**, *253*, 1578–1588, doi:10.1016/j.fuel.2019.05.081.
1111. Edison, T.N.J.I.; Atchudan, R.; Karthik, N.; Chandrasekaran, S.; Perumal, S.; Raja, P.B.; Perumal, V.; Lee, Y.R. Deep Eutectic Solvent Assisted Electrosynthesis of Ruthenium Nanoparticles on Stainless Steel Mesh for Electrocatalytic Hydrogen Evolution Reaction. *Fuel* **2021**, *297*, doi:10.1016/j.fuel.2021.120786.

1112. Elsheikh, H.; Eveloy, V. Assessment of Variable Solar- and Grid Electricity-Driven Power-to-Hydrogen Integration with Direct Iron Ore Reduction for Low-Carbon Steel Making. *Fuel* **2022**, *324*, doi:10.1016/j.fuel.2022.124758.
1113. Gong, L.; Wang, J.; Xiang, L.; Huang, J.; Fattahpour, V.; Roostaei, M.; Mamoudi, M.; Fermaniuk, B.; Luo, J.-L.; Zeng, H. Characterizing Foulants on Slotted Liner and Probing the Surface Interaction Mechanisms in Organic Media with Implication for an Antifouling Strategy in Oil Production. *Fuel* **2021**, *290*, doi:10.1016/j.fuel.2020.120008.
1114. Hoxha, A.; Palone, O.; Cedola, L.; Stendardo, S.; Borello, D. Development of a Novel Carbon Capture and Utilization Approach for Syngas Production Based on a Chemical Looping Cycle. *Fuel* **2022**, *325*, doi:10.1016/j.fuel.2022.124760.
1115. Kim, S.; Kim, J. The Optimal Carbon and Hydrogen Balance for Methanol Production from Coke Oven Gas and Linz-Donawitz Gas: Process Development and Techno-Economic Analysis. *Fuel* **2020**, *266*, doi:10.1016/j.fuel.2020.117093.
1116. Koskela, A.; Suopajarvi, H.; Fabritius, T. Interaction between Coal and Lignin Briquettes in Co-Carbonization. *Fuel* **2022**, *324*, doi:10.1016/j.fuel.2022.124823.
1117. Lei, Z.; liu, M.; Yan, J.; Chun, T.; Fang, J.; Li, Z.; Shui, H.; Ren, S.; Wang, Z.; Cao, X.; et al. Catalytic Combustion of Coke Nuts and In-Situ NO Reduction under the Action of Steel Scale. *Fuel* **2021**, *289*, doi:10.1016/j.fuel.2020.119779.
1118. Liu, Q.; Zhao, Y.-J.; Huang, Y.; Pei, F.; Cui, Y.; Shi, L.-J.; Chang, L.-P.; Yi, Q. Pilot Test of Low-Rank Coal Pyrolysis Coupled with Gasification to Hydrogen-Rich Gas for Direct Reduced Iron: Process Modeling, Simulation and Thermodynamic Analysis. *Fuel* **2023**, *331*, doi:10.1016/j.fuel.2022.125862.
1119. Luévano-Hipólito, E.; Torres-Martínez, L.M. CO<sub>2</sub> Photoreduction with H<sub>2</sub>O to C<sub>1</sub> and C<sub>2</sub> Products over Perovskite Films of Alkaline Niobates ANbO<sub>3</sub> (A = Li, Na, K). *Fuel* **2022**, *320*, doi:10.1016/j.fuel.2022.123934.
1120. Matbouei, M.; Weston, D.P.; Liang, X.; Hainsworth, S.V. An Investigation of the Effect of Temperature on the Oxidation Processes of Metallic Diesel Engine Fuel System Materials and B100 Biodiesel from Used Cooking Oil in Exposure Testing. *Fuel* **2021**, *285*, doi:10.1016/j.fuel.2020.119063.
1121. Mével, R.; Rostand, F.; Lemarié, D.; Breyton, L.; Shepherd, J.E. Oxidation of N-Hexane in the Vicinity of the Auto-Ignition Temperature. *Fuel* **2019**, *236*, 373–381, doi:10.1016/j.fuel.2018.09.009.
1122. Mohammad, S.; Patra, S.; Harichandan, B. Reductants in Iron Ore Sintering: A Critical Review. *Fuel* **2023**, *332*, doi:10.1016/j.fuel.2022.126194.
1123. Mukherjee, A.; Maity, A.; Chatterjee, S. Enabling a Gasification and Carbon Capture Economy in India: An Integrated Techno-Economic Analysis. *Fuel* **2020**, *263*, doi:10.1016/j.fuel.2019.116595.
1124. Qin, L.; Gao, X. Properties of Coal Gangue-Portland Cement Mixture with Carbonation. *Fuel* **2019**, *245*, 1–12, doi:10.1016/j.fuel.2019.02.067.
1125. Ren, S.; Yang, H.; Jiang, L.; Zhao, D.; Wang, X. Combustion of Liquid Ethanol in an Innovatory Vortex-Tube Combustor with Self-Evaporating and Edge-like

- Flame Properties. *Fuel* **2020**, *280*, doi:10.1016/j.fuel.2020.118680.
1126. Sathish Sharma, G.; Sugavaneswaran, M.; Prakash, R. Design and Validation of Additive Manufactured Catalytic Converter for the Control of Regulated and Unregulated Emissions of a Gasohol Fuelled Spark Ignition Engine. *Fuel* **2022**, *309*, doi:10.1016/j.fuel.2021.122146.
1127. Siciliano, B.; da Silva, C.M.; Loureiro, L.N.; Vicentini, P.C.; Arbilla, G. Hydrocarbon Emissions in Flex Fuel Vehicles Using Ethanol: Preliminary Results Using a Method Implemented in Brazil. *Fuel* **2021**, *287*, doi:10.1016/j.fuel.2020.119506.
1128. Song, Q.; Zhao, H.; Jia, J.; Zhang, F.; Wang, Z.; Lv, W.; Yang, L.; Zhang, W.; Zhang, Y.; Shu, X. Characterization of the Products Obtained by Pyrolysis of Oil Sludge with Steel Slag in a Continuous Pyrolysis-Magnetic Separation Reactor. *Fuel* **2019**, *255*, doi:10.1016/j.fuel.2019.115711.
1129. Taira, K. NO<sub>x</sub> Emission Profile Determined by In-Situ Gas Monitoring of Iron Ore Sintering during Packed-Bed Coke Combustion. *Fuel* **2019**, *236*, 244–250, doi:10.1016/j.fuel.2018.09.008.
1130. Wartha, E.-M.; Haugen, N.E.; Karchniwy, E.; Bösenhofer, M.; Harasek, M.; Løvås, T. The Effect of Turbulence on the Conversion of Coal under Blast Furnace Raceway Conditions. *Fuel* **2023**, *331*, doi:10.1016/j.fuel.2022.125840.
1131. Zhang, S.; Wen, Z.; Wang, G.; Lou, G.; Liu, X. Kinetic Analyses of Coke Combustion and Thermal Decompositions of Limestone and Dolomite Based on the Sintering Atmosphere. *Fuel* **2021**, *289*, doi:10.1016/j.fuel.2020.119870.
1132. Zhuo, Y.; Hu, Z.; Shen, Y. CFD Study of Hydrogen Injection through Tuyeres into Ironmaking Blast Furnaces. *Fuel* **2021**, *302*, doi:10.1016/j.fuel.2021.120804.
1133. Condori, O.; García-Labiano, F.; de Diego, L.F.; Izquierdo, M.T.; Abad, A.; Adánez, J. Biomass Chemical Looping Gasification for Syngas Production Using LD Slag as Oxygen Carrier in a 1.5 KW<sub>th</sub> Unit. *Fuel Processing Technology* **2021**, *222*, doi:10.1016/j.fuproc.2021.106963.
1134. Ma, L.; Han, L.; Chen, S.; Hu, J.; Chang, L.; Bao, W.; Wang, J. Rapid Synthesis of Magnetic Zeolite Materials from Fly Ash and Iron-Containing Wastes Using Supercritical Water for Elemental Mercury Removal from Flue Gas. *Fuel Processing Technology* **2019**, *189*, 39–48, doi:10.1016/j.fuproc.2019.02.021.
1135. Ren, B.; Wang, G.; Zuo, H.; Xue, Q.; She, X.; Wang, J. Reforming of Converter Gas with Coke Oven Gas for Thermochemical Energy Storage and Carbon Dioxide Emission Reduction. *Fuel Processing Technology* **2021**, *222*, doi:10.1016/j.fuproc.2021.106957.
1136. Simčič, T.; Pengal, P.; Eleršek, T.; Cokan, B.; Mori, N. Ecological Processes in the Hydropower Plant Reservoir under Multiple Anthropogenic Pressures. *Fundamental and Applied Limnology* **2022**, *195*, 257–273, doi:10.1127/fal/2021/1408.
1137. Äkäsloppolo, S.; Drewelow, P.; Gao, Y.; Ali, A.; Bozhenkov, S.; Fellingner, J.; Geiger, J.; Hartmann, D.; Hathiramani, D.; Jakubowski, M.; et al. Armoring of the Wendelstein 7-X Divertor-Observation Immersion-Tubes Based on NBI Fast-Ion

- Simulations. *Fusion Engineering and Design* **2019**, *146*, 862–865, doi:10.1016/j.fusengdes.2019.01.099.
1138. Almaguila, S.; Caneve, L.; Colao, F.; Lazic, V.; Maddaluno, G.; Mosetti, P.; Palucci, A.; Reale, A.; Gasior, P.; Gromelski, W.; et al. LIBS Measurements inside the FTU Vacuum Vessel by Using a Robotic Arm. *Fusion Engineering and Design* **2021**, *169*, doi:10.1016/j.fusengdes.2021.112638.
1139. Di Pace, L.; Beone, T.; Di Donato, A.; Miceli, P.; Macci, F.; Piancaldini, R.; Zanin, E. Feasibility Studies of DEMO Potential Waste Recycling by Proven Existing Industrial-Scale Processes. *Fusion Engineering and Design* **2019**, *146*, 107–110, doi:10.1016/j.fusengdes.2018.11.047.
1140. Di Pace, L.; Beone, T.; Di Donato, A.; Astri, A.; Colaneri, A.; Cea, A.; Mirabile, D.; Demir, A.G. DEMO Radioactive Wastes: Decarburization, Recycling and Reuse by Additive Manufacturing. *Fusion Engineering and Design* **2021**, *168*, doi:10.1016/j.fusengdes.2021.112439.
1141. Eshkevar Vakili, A.; Rasouli, C.; Ghasemi, F.; Abbasi Davani, F. Conceptual Design of 30 KW-NBI Injector Using a Multi-Cusp Ion Source for Heating of D-Shaped Damavand Tokamak Plasma. *Fusion Engineering and Design* **2019**, *144*, 6–17, doi:10.1016/j.fusengdes.2019.04.003.
1142. Farahbod, A.H.; Morshedian, N.; Aram, M. Time Resolved and Time Integrated Analysis of the AXUV Photodiode Diagnostics for EUV and Soft X-Ray Emission of Nanosecond-Laser-Produced Plasma. *Fusion Engineering and Design* **2020**, *156*, doi:10.1016/j.fusengdes.2020.111589.
1143. Feng, J.; Zhang, P.; Jia, Z.; Yu, Z.; Fang, C.; Yan, H.; Shi, H.; Tian, Y. Microstructures and Mechanical Properties of Reduced Activation Ferritic/Martensitic Steel Fabricated by Laser Melting Deposition. *Fusion Engineering and Design* **2021**, *173*, doi:10.1016/j.fusengdes.2021.112865.
1144. Feng, S.; Ke, C.; Chen, Y.; Zhang, H.; He, Y.; Zhao, Y. CF-LIBS Analysis in Depth Profile of Lithium Corrosion Resistance of Er<sub>2</sub>O<sub>3</sub> Coatings Prepared by Sol-Gel Method. *Fusion Engineering and Design* **2021**, *170*, doi:10.1016/j.fusengdes.2021.112506.
1145. Gorley, M.; Aiello, G.; Henry, J.; Nozawa, T.; Pintsuk, G.; Rieth, M.; Tanigawa, H. DEMO Structural Materials Qualification and Development. *Fusion Engineering and Design* **2021**, *170*, doi:10.1016/j.fusengdes.2021.112513.
1146. Kolšek, A.; Ogando, F.; Pampin, R.; López-Revelles, A.J.; Sanz, J.; Juárez, R. Shielding Proposal to Mitigate the PFC #2 Heating Due to 16N Decay Photon Radiation from the Activated Cooling Water. *Fusion Engineering and Design* **2019**, *148*, doi:10.1016/j.fusengdes.2019.111298.
1147. Li, C.L.; Zuo, G.Z.; Maingi, R.; Meng, X.C.; Xu, W.; Sun, Z.; Qian, Y.Z.; Huang, M.; Andruczyk, D.; Tritz, K.; et al. Development of a New TZM Substrate Flowing Liquid Lithium Limiter for High Performance Plasma Discharge in EAST. *Fusion Engineering and Design* **2020**, *158*, doi:10.1016/j.fusengdes.2020.111747.
1148. Liu, W.; Sheng, Q.; Ma, Y.; Cai, Q.; Wang, J.; Liu, Y. Interfacial Microstructures,

- Residual Stress and Mechanical Analysis of Hot Isostatic Pressing Diffusion Bonded Joint of 93W–4.9Ni–2.1Fe Alloy and 30CrMnSiNi2A Steel. *Fusion Engineering and Design* **2020**, *156*, doi:10.1016/j.fusengdes.2020.111602.
1149. Panchal, M.; Saraswat, A.; Chaudhuri, P. Experimental Measurements of Gas Pressure Drop of Packed Pebble Beds. *Fusion Engineering and Design* **2020**, *160*, doi:10.1016/j.fusengdes.2020.111836.
1150. Pandey, C.; Thakare, J.G.; Tharaphadar, P.; Kumar, P.; Gupta, A.; Sirohi, S. Characterization of the Soft Zone in Dissimilar Welds Joint of 2.25Cr-1Mo and Lean Duplex LDX2101 Steel. *Fusion Engineering and Design* **2021**, *163*, doi:10.1016/j.fusengdes.2020.112147.
1151. Shoshin, A.; Burdakov, A.; Ivantsivskiy, M.; Polosatkin, S.; Semenov, A.; Sulyaev, Y.; Zaitsev, E.; Polozova, P.; Taskaev, S.; Kasatov, D.; et al. Test Results of Boron Carbide Ceramics for ITER Port Protection. *Fusion Engineering and Design* **2021**, *168*, doi:10.1016/j.fusengdes.2021.112426.
1152. Wang, W.; Xia, L.; Mao, Y.; Wen, C.; Li, H.; Chen, X.; Zhang, W.; Zhou, X.; Long, X.; Peng, S. On-Line Micro GC Testing of Protium Analysis in DT Fuels from TCAP Products. *Fusion Engineering and Design* **2021**, *170*, doi:10.1016/j.fusengdes.2021.112481.
1153. Wang, X.; Chen, Z.; Wang, W.; Xu, Y.; Li, Q.; Xie, C.; Wang, J.; Yang, Z.; Luo, G.-N. Fibre Bragg Grating Sensors for Fusion Diagnostics: Temperature Monitoring of a Tungsten Mono-Block Mock-up under High Heat Flux. *Fusion Engineering and Design* **2020**, *150*, doi:10.1016/j.fusengdes.2019.111378.
1154. Xu, Y.; Wu, Z.-S.; Luo, L.-M.; Zan, X.; Zhu, X.-Y.; Xu, Q.; Wu, Y.-C. Transport Parameters and Permeation Behavior of Hydrogen Isotopes in the First Wall Materials of Future Fusion Reactors. *Fusion Engineering and Design* **2020**, *155*, doi:10.1016/j.fusengdes.2020.111563.
1155. Yang, W.; Zeng, Q.; Chen, C.; Chen, Z.; Song, J.; Wang, Z.; Yu, J.; Yakovlev, D.; Prikhodko, V. Shielding Design and Neutronics Calculation of the GDT Based Fusion Neutron Source ALIANCE. *Fusion Engineering and Design* **2021**, *164*, doi:10.1016/j.fusengdes.2020.112221.
1156. Zhong, W.; Tan, L. Radiological Analysis and Transmutation Calculation of Representative Castable Nanostructured Alloys. *Fusion Engineering and Design* **2020**, *160*, doi:10.1016/j.fusengdes.2020.111899.
1157. Aker, M.; Röllig, M. Material Studies to Reduce the Tritium Memory Effect in BIXS Analytic Systems. *Fusion Science and Technology* **2020**, *76*, 373–378, doi:10.1080/15361055.2020.1712989.
1158. Gangradey, R.; Mishra, J.; Mukherjee, S.; Nayak, P.; Panchal, P.; Agarwal, J.; Gupta, V. Experimental Investigation of Thermal Properties of Materials Used to Develop Cryopump. *Fusion Science and Technology* **2021**, *77*, 333–339, doi:10.1080/15361055.2021.1904770.
1159. Lindquist, E.G.; Gebhart, T.E.; Elliott, D.; Garren, E.W.; He, Z.; Kafle, N.; Smith, C.D.; Thomas, C.E.; Zinkle, S.J.; Biewer, T.M. Reconfiguration of an

- Electrothermal-Arc Plasma Source for In Situ PMI Studies. *Fusion Science and Technology* **2021**, *77*, 921–927, doi:10.1080/15361055.2021.1909989.
1160. Morris, E.; Freudenberg, K.F.; Myatt, L.; Reagan, T.; Reiersen, W. Design and Analysis of the US ITER Central Solenoid Module Lifting Fixture. *Fusion Science and Technology* **2019**, *75*, 815–822, doi:10.1080/15361055.2019.1629250.
  1161. Xia, W.; Yang, L.; Zhang, K.; He, P.; Shu, L.; Han, L.; Ma, X.; Zhang, Z.; Cao, Z.; Gou, F. Study of Corrosion Behaviors of 316L Stainless Steel Welds in Liquid Lithium with Hydrogen Impurity. *Fusion Science and Technology* **2019**, *75*, 104–111, doi:10.1080/15361055.2018.1533618.
  1162. Ye, Z.; Yang, W.; Shu, L.; Wang, Z.; Liu, Q.; Yan, Q.; Wei, J.; Zhang, K.; Gou, F. The Investigation of Corrosion Behaviors of Type 316L Stainless Steel in Stagnating Liquid Lithium. *Fusion Science and Technology* **2020**, *76*, 157–162, doi:10.1080/15361055.2019.1704596.
  1163. Ji, S.; Zhang, F.; Shi, Y.; Zhan, C.; Zhu, Y.; Lu, W. Review on Vibration-Based Mechanical Condition Monitoring in Power Transformers. *Gaodianya Jishu/High Voltage Engineering* **2020**, *46*, 257–272, doi:10.13336/j.1003-6520.hve.20191227019.
  1164. Lü, Q.; Qiu, Y.; Tang, F.; Wu, J.; Li, X. Parameters of Laser-Induced Breakdown Spectroscopy System Using Fiber-Optic Transmission Laser. *Gaodianya Jishu/High Voltage Engineering* **2020**, *46*, 3301–3310, doi:10.13336/j.1003-6520.hve.20190549.
  1165. Wang, D.; Zhang, L.; Zhu, Z.; Su, W.; Chen, T.; Fan, S. Influence of Metal Material of Transformer on Oil-Paper Insulation After Thermal Aging. *Gaodianya Jishu/High Voltage Engineering* **2019**, *45*, 2954–2963, doi:10.13336/j.1003-6520.hve.20180822008.
  1166. Zhao, J.; Chen, W.; Bian, K.; Ni, Y.; Teng, Z.; Zhao, Y. Distribution Characteristics of Spatial Magnetic Field in UHV GIL Gallery in Short-Circuit Fault Condition. *Gaodianya Jishu/High Voltage Engineering* **2021**, *47*, 1866–1871, doi:10.13336/j.1003-6520.hve.20200552.
  1167. Hanley, K.W.; Andrews, R.N.; Bertke, S.; Carter, T.; Navarro, K.; Ashley, K. Manganese Fractionation Using a Sequential Extraction Method to Evaluate Welders' Flux Core Arc Welding Exposures in a Shipyard, Structural Steel and Custom Parts Manufacturers. *Gefahrstoffe Reinhaltung der Luft* **2020**, *80*, 185–193.
  1168. Xu, X.; Xu, G.; Yang, J.; Xu, Z.; Ren, Y. Field Observation of the Wave-Induced Pore Pressure Response in a Silty Soil Seabed. *Geo-Marine Letters* **2021**, *41*, doi:10.1007/s00367-020-00680-6.
  1169. Khobragade, P.P.; Ahirwar, A.V. Source Identification and Ambient Trace Element Concentrations of PM10 Using Receptor Modeling in an Urban Area of Chhattisgarh, India. *Geocarto International* **2022**, doi:10.1080/10106049.2022.2066201.
  1170. Dixon, N.; Smith, A.; Pietz, M. A Community-Operated Landslide Early Warning Approach: Myanmar Case Study. *Geoenvironmental Disasters* **2022**, *9*, doi:10.1186/s40677-022-00220-7.
  1171. Nakamura, Y.; Okada, K. Review on Seismic Isolation and Response Control Methods of Buildings in Japan. *Geoenvironmental Disasters* **2019**, *6*,

- doi:10.1186/s40677-019-0123-y.
1172. A. velikotskij, M.; Marakhtanov, V.P. Corrosion of the Gas Pipelines of the Field Medvezhiye in the Different Landscape Types. *Geography, Environment, Sustainability* **2020**, *13*, 6–12, doi:10.24057/2071-9388-2019-80.
  1173. Kajino, M.; Hagino, H.; Fujitani, Y.; Morikawa, T.; Fukui, T.; Onishi, K.; Okuda, T.; Kajikawa, T.; Igarashi, Y. Modeling Transition Metals in East Asia and Japan and Its Emission Sources. *GeoHealth* **2020**, *4*, doi:10.1029/2020GH000259.
  1174. Jiang, N.; Li, H.-B.; Kou, Q.-J.; Zhou, J.-W. Quantitative Monitoring Method for Analyzing the Erosion of a Landslide Dam Discharge Channel Using Three-Dimensional Terrestrial Laser Scanning. *Geomatics, Natural Hazards and Risk* **2021**, *12*, 1905–1930, doi:10.1080/19475705.2021.1953157.
  1175. Tawfik, T.A.; El-Yamani, M.A.; Serag Faried, A.; Mohammed, S.M.; AbdEl-Hafez, G. Influence of Thiourea Synthesis with Silica Fume on the Corrosion Rate of Reinforcement Concrete. *Geosystem Engineering* **2020**, *23*, 146–158, doi:10.1080/12269328.2019.1660235.
  1176. Kupfernagel, J.-H.; Hesse, J.C.; Schedel, M.; Welsch, B.; Anbergen, H.; Müller, L.; Sass, I. Impact of Operational Temperature Changes and Freeze–Thaw Cycles on the Hydraulic Conductivity of Borehole Heat Exchangers. *Geothermal Energy* **2021**, *9*, doi:10.1186/s40517-021-00206-y.
  1177. Tut Hakkıdır, F.S.; Özen Balaban, T. A Review of Mineral Precipitation and Effective Scale Inhibition Methods at Geothermal Power Plants in West Anatolia (Turkey). *Geothermics* **2019**, *80*, 103–118, doi:10.1016/j.geothermics.2019.02.013.
  1178. Uliasz-Misiak, B.; Winid, B. Perspectives of Using the Quaternary Groundwaters in the Low-Temperature Geothermal Systems in Poland. *Geothermics* **2020**, *87*, doi:10.1016/j.geothermics.2020.101842.
  1179. Ura-Bińczyk, E.; Banaś, J.; Mazurkiewicz, B.; Solariski, W.; Lewandowska, M.; Roguska, A.; Andrzejczuk, M.; Balcer, M.; Kulik, S.; Żarnowiec, P.; et al. On-Site Monitoring and Laboratory Characterization of Corrosion Processes in the Geothermal Water of Polish Lowland. *Geothermics* **2019**, *77*, 267–277, doi:10.1016/j.geothermics.2018.10.002.
  1180. Fisch-Romito, V. Embodied Carbon Dioxide Emissions to Provide High Access Levels to Basic Infrastructure around the World. *Global Environmental Change* **2021**, *70*, doi:10.1016/j.gloenvcha.2021.102362.
  1181. Kong, X.; Feng, K.; Wang, P.; Wan, Z.; Lin, L.; Zhang, N.; Li, J. Steel Stocks and Flows of Global Merchant Fleets as Material Base of International Trade from 1980 to 2050. *Global Environmental Change* **2022**, *73*, doi:10.1016/j.gloenvcha.2022.102493.
  1182. Yu, X.; Tan, C. China's Pathway to Carbon Neutrality for the Iron and Steel Industry. *Global Environmental Change* **2022**, *76*, doi:10.1016/j.gloenvcha.2022.102574.
  1183. Hoose, A.; Kripka, M. Correlational Investigation of Manufacturing Technology and Environmental Impact in an Agricultural Machinery Industry. *Global Nest Journal* **2021**, *23*, 186–194, doi:10.30955/gnj.003691.

1184. Griffin, P.W.; Hammond, G.P. The Prospects for ‘Green Steel’ Making in a Net-Zero Economy: A UK Perspective. *Global Transitions* **2021**, *3*, 72–86, doi:10.1016/j.glt.2021.03.001.
1185. Feizi Mohazzab, B.; Jaleh, B.; Issaabadi, Z.; Nasrollahzadeh, M.; Varma, R.S. Stainless Steel Mesh-GO/Pd NPs: Catalytic Applications of Suzuki-Miyaura and Stille Coupling Reactions in Eco-Friendly Media. *Green Chemistry* **2019**, *21*, 3319–3327, doi:10.1039/c9gc00889f.
1186. Liu, Q.; Pan, D.; Ding, T.; Ye, M.; He, F. Clean & Environmentally Friendly Regeneration of Fe-Surface Cleaning Pickling Solutions. *Green Chemistry* **2020**, *22*, 8728–8733, doi:10.1039/d0gc03297b.
1187. Verdonck, T.; Verpoort, P.; De Strycker, J.; De Cleene, A.; Banerjee, D.; Nockemann, P.; Van Deun, R.; Van Hecke, K. Chromium(III) in Deep Eutectic Solvents: Towards a Sustainable Chromium(VI)-Free Steel Plating Process. *Green Chemistry* **2019**, *21*, 3637–3650, doi:10.1039/c9gc00690g.
1188. Ren, E.; Tang, S.; Liu, C.; Yue, H.; Li, C.; Liang, B. Carbon Dioxide Mineralization for the Disposition of Blast-Furnace Slag: Reaction Intensification Using NaCl Solutions. *Greenhouse Gases: Science and Technology* **2020**, *10*, 436–448, doi:10.1002/ghg.1837.
1189. Ugwuishiwu, B.; Nwakaire, J.; Ohagwu, C. Cost Analysis of Carbon Capture and Storage for Current Gas-Fired Power Plants in Nigeria. *Greenhouse Gases: Science and Technology* **2019**, *9*, 370–386, doi:10.1002/ghg.1855.
1190. Wu, Q.; Lin, Q.; Yang, Q.; Li, Y. An Optimization-Based CCUS Source-Sink Matching Model for Dynamic Planning of CCUS Clusters. *Greenhouse Gases: Science and Technology* **2022**, *12*, 433–453, doi:10.1002/ghg.2159.
1191. Rivero-Camacho, C.; Ferreira-Sánchez, A. Application of the “Footprint Family” for the Environmental Evaluation of Public Buildings in Spain. Case Study: Educational Center. *Habitat Sustentable* **2021**, *11*, 72–85, doi:10.22320/07190700.2021.11.01.06.
1192. Wei, Q.; Song, P.; Liu, G.; Li, Z.; Qu, X. Fatigue Crack Identification Method for Oil and Gas Pipelines on Offshore Platforms. *Harbin Gongcheng Daxue Xuebao/Journal of Harbin Engineering University* **2022**, *43*, 481–487, doi:10.11990/jheu.202010032.
1193. Zhang, M.; Wei, Q.; Shi, H.; Qu, X. Ice Load Identification and Static Strength Analysis of a Steel Gate. *Harbin Gongcheng Daxue Xuebao/Journal of Harbin Engineering University* **2019**, *40*, 1543–1548, doi:10.11990/jheu.201807035.
1194. Li, J.; Liang, Z.; Song, Y.; Yin, X.; Song, Y.; Jiang, B. Research on Data Analysis of Added Strain Gages of Containment Building under the Pressure Test of Nuclear Power Unit during the Overhaul Period. *He Jishu/Nuclear Techniques* **2019**, *42*, doi:10.11889/j.0253-3219.2019.hjs.42.120602.
1195. Li, Q.; Fan, Y.; Wang, S.; Chang, Y.; Zhao, Y.; Liu, S.; Jia, H.; Zhang, X. Experimental Measurement Study on <sup>127</sup>Xe Intercomparison Sample for CTBT Radionuclide Laboratories. *He Jishu/Nuclear Techniques* **2020**, *43*,



- doi:10.11889/j.0253-3219.2020.hjs.43.070502.
1196. Klumpp, J.; Bertelli, L.; Dumit, S.; Gadd, M.; Poudel, D.; Waters, T.L. Response to a Skin Puncture Contaminated with <sup>238</sup>Pu at Los Alamos National Laboratory. *Health Physics* **2020**, *119*, 704–714, doi:10.1097/HP.0000000000001250.
  1197. Martin, M. Radiation Oncology-External-Beam Radiation Therapy. *Health Physics* **2019**, *116*, 184–188, doi:10.1097/HP.0000000000001034.
  1198. Taran, A.V.; Garkusha, I.E.; Taran, V.S.; Tymoshenko, O.I.; Misiruk, I.O.; Romaniuk, S.P.; Skoblo, T.S.; Mal'tsev, T.V. Production and Characterization of CA-PVD ZRN and ZRCN Coatings on Aisi D3 High-Carbon Tool Steel. *High Temperature Material Processes* **2020**, *24*, 109–120, doi:10.1615/HighTempMatProc.2020034981.
  1199. Xue, Y.-L.; Zhang, J.; Liu, Y.; Chen, Y.; Sun, J.; Jiang, H.-Q.; Zhang, W.; Cao, D. Roadmap of Coal Control and Carbon Reduction in the Steel Industry Under the Carbon Peak and Neutralization Target. *Huan jing ke xue= Huanjing kexue* **2022**, *43*, 4392–4400, doi:10.13227/j.hj.kx.202201081.
  1200. Yang, Y.-Y.; Xie, D.-P.; Fu, J.-P.; Chen, X.-Y.; Yin, W.-H.; Han, J.-L.; Zhang, S.-K.; Zhang, L.; Xiao, T. Pollution Characteristics and Emission Factors of PCDD/Fs from Iron and Steel Industry. *Huan jing ke xue= Huanjing kexue* **2022**, *43*, 3990–3997, doi:10.13227/j.hj.kx.202110197.
  1201. Deng, J.; Zhang, Y.; Wang, L.; Li, Y.; Duan, L.; Hao, J.; Jiang, J. In-Direct Dilution Method and Sampling System for Measuring Condensable Particulate Matter from Stationary Sources. *Huanjing Kexue Xuebao/Acta Scientiae Circumstantiae* **2020**, *40*, 4162–4168, doi:10.13671/j.hjkxxb.2020.0305.
  1202. Li, N.; Yang, L.; Deng, M.; Zhu, Y.; Ye, G.; Shen, J. Spatial and Temporal Variation Assessments on Anthropogenic Cadmium Emission Sources & Sinks in Zhejiang Province. *Huanjing Kexue Xuebao/Acta Scientiae Circumstantiae* **2021**, *41*, 2498–2509, doi:10.13671/j.hjkxxb.2020.0429.
  1203. Liu, J.; Wang, R.; Yan, Y.; Zhang, H.; Yi, Z. Preparation of Fe-NaA Molecular Sieve Membrane and Its Application in Catalytic Wet Peroxide Oxidation of Methyl Orange Solution. *Huanjing Kexue Xuebao/Acta Scientiae Circumstantiae* **2019**, *39*, 2543–2549, doi:10.13671/j.hjkxxb.2019.0101.
  1204. Liu, L.; Wu, S.; Yang, C.; Zhong, W.; Meng, L.; Deng, H. The Response of Electrical Signals Generated by DH-I Type Sediment Microbial Fuel Cell Based Sensors to Multipal Cadmium Pollution. *Huanjing Kexue Xuebao/Acta Scientiae Circumstantiae* **2019**, *39*, 2224–2230, doi:10.13671/j.hjkxxb.2019.0123.
  1205. Liu, X.; Yang, M.; Li, F.; Chen, M.; Zheng, J.; Li, F.; Jin, J.; Wu, D. Analysis of Water Extractable Arsenic Species in PM<sub>2.5</sub> in Nanjing Based on Multiple Sampling Sites. *Huanjing Kexue Xuebao/Acta Scientiae Circumstantiae* **2019**, *39*, 3668–3676, doi:10.13671/j.hjkxxb.2019.0212.
  1206. Sun, S.; Xu, H.; Zhuo, M.; Zhang, Z.; Ding, Z.; Guo, Y.; Xiao, C.; Xin, J.; Li, K. Study on the Optimization of the Electric Field Pretreatment for Enhanced Microalgae Treatment of Pig Farm Wastewater. *Huanjing Kexue Xuebao/Acta Scientiae*

- Circumstantiae* **2021**, *41*, 3166–3174, doi:10.13671/j.hjkxxb.2021.0025.
1207. Yi, X.; Yin, S.; Tan, X.; Huang, L.; Wang, Y.; Chen, Y.; Li, L. Preliminary Study on the Inventory of Sources of Hydrogen Chloride and Particulate Chlorine in the Atmosphere in Shanghai. *Huanjing Kexue Xuebao/Acta Scientiae Circumstantiae* **2020**, *40*, 469–478, doi:10.13671/j.hjkxxb.2019.0376.
1208. Zhao, Y.; Yang, X.; Ye, G.; Wei, C.; Wei, J.; Li, F.; Jiang, C.; Liu, X.; Fu, Y.; Zhu, Z. Formation and Treatment Methods Evaluation of Solid-Phase Substances in Coking Wastewater Treatment. *Huanjing Kexue Xuebao/Acta Scientiae Circumstantiae* **2020**, *40*, 2548–2556, doi:10.13671/j.hjkxxb.2020.0157.
1209. Chen, L.-L.; Huang, T.; Chen, K.-J.; Song, S.-J.; Gao, H.; Ma, J.-M. Gridded Atmospheric Emission Inventory of PCDD/Fs in China. *Huanjing Kexue/Environmental Science* **2020**, *41*, 510–519, doi:10.13227/j.hjkx.201908056.
1210. Du, X.-S.; Yan, L.; He, J.-Y.; Wang, X.-Y.; Wang, K.; Zhang, R.-Q. PM<sub>2.5</sub> Emission Characteristics and Estimation of Emission Reduction Potential from Typical Industrial Sources in Anyang. *Huanjing Kexue/Environmental Science* **2019**, *40*, 2043–2051, doi:10.13227/j.hjkx.201809214.
1211. Feng, X.-Q.; Chen, J.-H.; Xiong, W.-P.; Mei, L.-D.; Xu, X.-M.; Yin, H.-M.; Fan, W.-B.; Jiang, T.; Qian, J.; Ye, H. Fine Particulate Matter Source Profile of Typical Industries in Sichuan Province. *Huanjing Kexue/Environmental Science* **2019**, *40*, 1043–1051, doi:10.13227/j.hjkx.201804137.
1212. Gao, Z.-Y.; Xiao, R.-B.; Wang, P.; Deng, Y.-R.; Dai, W.-J.; Liu, C.-F. Improved Regression Kriging Prediction of the Spatial Distribution of the Soil Cadmium by Integrating Natural and Human Factors. *Huanjing Kexue/Environmental Science* **2021**, *42*, 343–352, doi:10.13227/j.hjkx.202005139.
1213. Guo, Q.-Y.; Bai, W.-Y.; Zhao, X.-Y.; Guo, L.-Y.; Wang, X.-H.; Geng, C.-M.; Wang, X.-L.; Wang, J.; Yang, W.; Bai, Z.-P. Source and Health Risk Assessment of PM<sub>2.5</sub>-Bound Metallic Elements in Road Dust in Zibo City. *Huanjing Kexue/Environmental Science* **2021**, *42*, 1245–1254, doi:10.13227/j.hjkx.202007176.
1214. Jiang, J.-K.; Deng, J.-G.; Wang, G.; Zhang, Y.; Li, Y.-J.; Duan, L.; Hao, J.-M. Measuring the Condensable Particle Matter from a Stationary Source. *Huanjing Kexue/Environmental Science* **2019**, *40*, 5234–5239, doi:10.13227/j.hjkx.201906145.
1215. Jiang, S.-N.; Kong, S.-F.; Zheng, H.; Zeng, X.; Chen, N.; Qi, S.-H. Real-Time Source Apportionment of PM<sub>2.5</sub> and Potential Geographic Origins of Each Source During Winter in Wuhan. *Huanjing Kexue/Environmental Science* **2022**, *43*, 61–73, doi:10.13227/j.hjkx.202105171.
1216. Luo, X.; Zhang, J.-B.; He, L.; Yang, X.-J.; Lü, P.-Y. Analysis of the Performance and Mechanism of Phosphorus Removal in Water by Steel Slag. *Huanjing Kexue/Environmental Science* **2021**, *42*, 2324–2333, doi:10.13227/j.hjkx.202008031.
1217. Shi, Y.-P.; Hu, J.-N.; Chu, Y.-X.; Duan, J.-C.; Hu, B.-X.; Yin, L.-N.; Lü, L.-L. Method of Identifying Air Pollution from Iron and Steel Industry Based on Ambient Air Quality Monitoring Data Analysis. *Huanjing Kexue/Environmental Science* **2022**, *43*, 2427–2435, doi:10.13227/j.hjkx.202109266.

1218. Sun, L.-N.; Liu, Y.; Zhao, J.-B.; Sun, S.-D.; Song, C.-B.; Zhang, J.; Li, Y.-N.; Lin, Y.-C.; Wang, T.; Mao, H.-J. Pollution Characteristics and Emission Factors of VOCs from Vehicle Emissions in the Tianjin Tunnel. *Huanjing Kexue/Environmental Science* **2019**, *40*, 104–113, doi:10.13227/j.hjcx.201804187.
1219. Tang, L.; Xue, X.-D.; Bo, X.; Jia, M.; Guo, J.; Tian, J.; Huang, M.-T.; Cui, W.-G.; Wang, T.; Li, S.-B.; et al. Contribution of Emissions from the Iron and Steel Industry to Air Quality in China. *Huanjing Kexue/Environmental Science* **2020**, *41*, 2981–2994, doi:10.13227/j.hjcx.201912166.
1220. Tang, Q.; Zheng, B.; Xue, W.-B.; Zhang, Q.; Lei, Y.; He, K.-B. Contributors to Air Pollutant Emission Changes in Autumn and Winter in Beijing-Tianjin-Hebei and Surrounding Areas. *Huanjing Kexue/Environmental Science* **2021**, *42*, 1591–1599, doi:10.13227/j.hjcx.202007218.
1221. Wang, Y.-Y.; Wang, X.-Y.; Du, M.; Bai, J.-F.; Yang, W. Emission Characteristics of Volatile Organic Compounds from Typical Industries in Zibo. *Huanjing Kexue/Environmental Science* **2020**, *41*, 1078–1084, doi:10.13227/j.hjcx.201906068.
1222. Wang, Z.-Y.; Li, Y.-B.; Guo, L.; Song, Z.-Q.; Xu, Y.-L.; Wang, F.; Liang, W.-Q.; Shi, G.-L.; Feng, Y.-C. PM<sub>2.5</sub> Source Apportionment Based on a Variety of New Receptor Models. *Huanjing Kexue/Environmental Science* **2022**, *43*, 608–618, doi:10.13227/j.hjcx.202106199.
1223. Wu, Z.-Y.; Zhang, L.-N.; Xia, T.-X.; Jia, X.-Y.; Li, H.-Y.; Wang, S.-J. Quantitative Assessment of Human Health Risks Based on Soil Heavy Metals and PAHs Sources: Take a Polluted Industrial Site of Beijing As an Example. *Huanjing Kexue/Environmental Science* **2020**, *41*, 4180–4196, doi:10.13227/j.hjcx.201910152.
1224. Ghoreishy, F.; Salehi, M.; Fallahzade, J. Cadmium and Lead in Rice Grains and Wheat Breads in Isfahan (Iran) and Human Health Risk Assessment. *Human and Ecological Risk Assessment* **2019**, *25*, 924–934, doi:10.1080/10807039.2018.1456898.
1225. Kumari, P.; Kumar Maiti, S. Health Risk Assessment of Lead, Mercury, and Other Metal(Loid)s: A Potential Threat to the Population Consuming Fish Inhabiting, a Lentic Ecosystem in Steel City (Jamshedpur), India. *Human and Ecological Risk Assessment* **2019**, *25*, 2174–2192, doi:10.1080/10807039.2018.1495055.
1226. Verma, A.; Kumar, R.; Yadav, S. Distribution, Pollution Levels, Toxicity, and Health Risk Assessment of Metals in Surface Dust from Bhiwadi Industrial Area in North India. *Human and Ecological Risk Assessment* **2020**, *26*, 2091–2111, doi:10.1080/10807039.2019.1650328.
1227. Xiao, Q.; Zong, Y.; Malik, Z.; Lu, S. Source Identification and Risk Assessment of Heavy Metals in Road Dust of Steel Industrial City (Anshan), Liaoning, Northeast China. *Human and Ecological Risk Assessment* **2020**, *26*, 1359–1378, doi:10.1080/10807039.2019.1578946.
1228. Ustariz-Farfan, A.J.; Ocampo-Wilches, J.A.; Narvaez-Villota, A.I.; Van Strahlen-Gutierrez, D.M.; Cano-Plata, E.A. Evaluation of Protection Systems in Electric Arc Furnaces: A Methodology for Assessment. *IEEE Industry Applications Magazine* **2021**, *27*, 18–35, doi:10.1109/MIAS.2020.3024481.

1229. Yang, C.; Lee, S.B.; Jang, G.; Kim, S.; Jung, G.; Lee, J.; Shim, S.; Lim, Y.K.; Kim, J.; Park, S. Starting Current Analysis in Medium Voltage Induction Motors: Detecting Rotor Faults and Reactor Starting Defects. *IEEE Industry Applications Magazine* **2019**, *25*, 69–79, doi:10.1109/MIAS.2019.2923105.
1230. Marjanović, M.; ATLAS Collaboration ATLAS Tile Calorimeter Calibration and Monitoring Systems. *IEEE Transactions on Nuclear Science* **2019**, *66*, 1228–1235, doi:10.1109/TNS.2019.2921941.
1231. Soma, S.; Kubota, Y.; Ohzu, T. Magnetic Form Applying a C-Shaped Magnet for Hybrid Electric Vehicles. *IEEJ Journal of Industry Applications* **2022**, *11*, 467–474, doi:10.1541/ieejia.21009036.
1232. Liu, K.; Gao, F. Coordination Optimisation of Energy and Manufacturing Flow for Industry Integrated Energy System. *IET Generation, Transmission and Distribution* **2022**, *16*, 3719–3733, doi:10.1049/gtd2.12559.
1233. Zhang, Y.; Wang, Z.; Zhu, Y.; Huang, X.; Wang, Y. Life Cycle Cost Assessment Method Considering Multiple Factors for Economic Evaluation of Cable Line Steel Brackets. *IET Generation, Transmission and Distribution* **2021**, *15*, 2488–2498, doi:10.1049/gtd2.12192.
1234. Hosseini, Z.; Naghavi, H.; Latifi, H.; Bakhtiari, S.B. Estimating Biomass and Carbon Sequestration of Plantations around Industrial Areas Using Very High Resolution Stereo Satellite Imagery. *IForest* **2019**, *12*, 533–541, doi:10.3832/ifor3155-012.
1235. Nandhini, E.; Manoj Kumaar, C. Experimental Study On Partial Replacement Of Fine Aggregate By Recycled Polypropylene Plastic Granules In Galvanized Iron Fiber Reinforced Concrete. *Indian Journal of Environmental Protection* **2021**, *41*, 918–923.
1236. Agarwal, K.; Shetty, S.; Desai, A. Effect of Various Mesh Designs on Shear Bond Strength of New and Recycled Brackets –a Comparative, Invitro Study. *Indian Journal of Forensic Medicine and Toxicology* **2020**, *14*, 211–218, doi:10.37506/ijfmt.v14i4.11472.
1237. Alsheekhly, B.; Adnan, M.M.; Al-Zubaydi, F.S. The Effect of Multiple Glass Bead Sterilization Cycles on Cyclic Fatigue of Af Blue s One File. *Indian Journal of Forensic Medicine and Toxicology* **2020**, *14*, 2222–2227, doi:10.37506/ijfmt.v14i4.11881.
1238. Bekö, G.; Wargocki, P.; Wang, N.; Li, M.; Weschler, C.J.; Morrison, G.; Langer, S.; Ernle, L.; Licina, D.; Yang, S.; et al. The Indoor Chemical Human Emissions and Reactivity (ICHEAR) Project: Overview of Experimental Methodology and Preliminary Results. *Indoor Air* **2020**, *30*, 1213–1228, doi:10.1111/ina.12687.
1239. Gong, M.; Daniels, N.; Poppendieck, D. Measurement of Chemical Emission Rates from Cigarette Butts into Air. *Indoor Air* **2020**, *30*, 711–724, doi:10.1111/ina.12648.
1240. Wu, Z.; Li, N.; Lan, L.; Wargocki, P. The Effect of Inhaled Air Temperature on Thermal Comfort, Perceived Air Quality, Acute Health Symptoms and Physiological Responses at Two Ambient Temperatures. *Indoor Air* **2022**, *32*,

- doi:10.1111/ina.13092.
1241. Kandeve, M.; Kalitchin, Z.; Zadorozhnaya, E.; Vencl, A. Performance Characteristics of Lubricant Based on Rapeseed Oil Containing Different Amounts of Metal-Containing Additive. *Industrial Lubrication and Tribology* **2022**, *74*, 309–315, doi:10.1108/ILT-07-2021-0259.
  1242. Sheik Muhamad, S.; Ghani, J.A.; Che Haron, C.H.; Yazid, H. Wear Mechanism of a Coated Carbide Tool in Cryogenic Machining of AISI 4340. *Industrial Lubrication and Tribology* **2020**, *72*, 509–514, doi:10.1108/ILT-07-2019-0291.
  1243. Anaya, P.; Rodríguez, J.; Andrade, C.; Martín-Pérez, B.; Hombrados, C.L. Determination of Wires Transfer Length in Prestressed Concrete Members with Different Levels of Corrosion. *Informes de la Construcción* **2020**, *72*, 1–10, doi:10.3989/ic.71428.
  1244. Orta, B.; Martínez-Gayá, J.E.; Cervera, J.; Aira, J.R. Timber High Rise, State of the Art. *Informes de la Construcción* **2020**, *72*, 1–13, doi:10.3989/ic.71578.
  1245. Gomes, J.F.; Miranda, R.M.; Oliveira, J.P.; Esteves, H.M.; Albuquerque, P.C. Evaluation of the Amount of Nanoparticles Emitted in LASER Additive Manufacture/Welding. *Inhalation Toxicology* **2019**, *31*, 125–130, doi:10.1080/08958378.2019.1621965.
  1246. Zeidler-Erdely, P.C.; Erdely, A.; Kodali, V.; Andrews, R.; Antonini, J.; Trainor-DeArmitt, T.; Salmen, R.; Battelli, L.; Grose, L.; Kashon, M.; et al. Lung Toxicity Profile of Inhaled Copper-Nickel Welding Fume in A/J Mice. *Inhalation Toxicology* **2022**, *34*, 275–286, doi:10.1080/08958378.2022.2089783.
  1247. Al-Hameedawi, A.N.M.; Abdulkhudhur, R.; Abdulkareem, A.O. Ground Penetration Radar Based Digital Image Processing for Reinforcement Corrosion in Concrete. *Innovative Infrastructure Solutions* **2022**, *7*, doi:10.1007/s41062-022-00840-w.
  1248. Bajad, M. Superstructures Development with Frame of Light Steel by Fusion Techniques. *Innovative Infrastructure Solutions* **2022**, *7*, doi:10.1007/s41062-022-00926-5.
  1249. Chakravarthi, S.; Shankar, S. Utilization of Recycled Aggregates in Cement-Treated Bases: A State-of-the-Art Review. *Innovative Infrastructure Solutions* **2021**, *6*, doi:10.1007/s41062-021-00555-4.
  1250. Dar, A.R.; Karthik, C.; Anbarasu, M.; Dar, M.A. Testing of Cold-Formed Ferritic Stainless Steel Stub Columns: Axial Behaviour and Design Strengths. *Innovative Infrastructure Solutions* **2021**, *6*, doi:10.1007/s41062-021-00541-w.
  1251. Eisa, M.S.; Fahmy, E.A.; Basiouny, M.E. Using Metakaolin-Based Geopolymer Concrete in Concrete Pavement Slabs. *Innovative Infrastructure Solutions* **2022**, *7*, doi:10.1007/s41062-021-00601-1.
  1252. Fiscina, L.F.G.; Barbosa, Y.; de Albuquerque, P.J.R.; de Carvalho, D. Field Study on Axial Behavior of Instrumented Post-Grouted Steel Pipe Micropiles in Tropical Lateritic Soil. *Innovative Infrastructure Solutions* **2021**, *6*, doi:10.1007/s41062-020-00411-x.

1253. Goli, A.; Emadi, H.; Sadeghi, P. Investigating the Effect of Using Steel Slag on Abrasion Resistance of Roller-Compacted Concrete Pavement. *Innovative Infrastructure Solutions* **2022**, *7*, doi:10.1007/s41062-022-00885-x.
1254. Govindan, B.; Ramasamy, V.; Panneerselvam, B.; Rajan, D. Performance Assessment on Bamboo Reinforced Concrete Beams. *Innovative Infrastructure Solutions* **2022**, *7*, doi:10.1007/s41062-021-00616-8.
1255. Ingle, G.S.; Bhosale, S.S. Development of Full-Scale Laboratory Accelerated Pavement Testing Facility: A Step toward Performance Assessment of Geosynthetics Reinforced Pavement. *Innovative Infrastructure Solutions* **2019**, *4*, doi:10.1007/s41062-019-0209-0.
1256. Jiménez, R.; Martínez-Jiménez, B.; Reyes, M.; Quintana, D.; Puebla, P.; Moreno, R. Carbon Footprint of Thermal Efficiency Construction Solutions Applied as Home Improvement in Temperate Climate Zones of Southern Chile. *Innovative Infrastructure Solutions* **2022**, *7*, doi:10.1007/s41062-022-00956-z.
1257. Moharana, S.; Bhalla, S.; Munjwani, S. Vibration-Based Pre-Emptive Detection of Plate Buckling Using Piezo-Transducers. *Innovative Infrastructure Solutions* **2022**, *7*, doi:10.1007/s41062-022-00749-4.
1258. Moubarak, A.M.R.; Elwardany, H.; el-hassan, K.A.; Taher, S.E.-D. Optimizing Metakaolin and Silica-Fume in Rc Beams with/without Strengthening. *Innovative Infrastructure Solutions* **2021**, *6*, doi:10.1007/s41062-020-00449-x.
1259. Raghu Babu, U.; Kondraivendhan, B. Influence of Bauxite Residue (Red Mud) on Corrosion of Rebar in Concrete. *Innovative Infrastructure Solutions* **2020**, *5*, doi:10.1007/s41062-020-00356-1.
1260. Sharba, A.A.K.; Ibrahim, A.J. Evaluating the Use of Steel Scrap, Waste Tiles, Waste Paving Blocks and Silica Fume in Flexural Behavior of Concrete. *Innovative Infrastructure Solutions* **2020**, *5*, doi:10.1007/s41062-020-00341-8.
1261. Siline, M. Efficiency of Incorporating Algerian Ground Granulated Blast Furnace Slag as a Supplementary Cementitious Material: A Review. *Innovative Infrastructure Solutions* **2022**, *7*, doi:10.1007/s41062-021-00720-9.
1262. Tawfeeq, W.M.; Ali, T.K.M.; Al-Kumzari, Y.; Al-Hosni, M.; Al-Fazari, K.; Al-Bedwawi, M.; Al-Bashkardi, A. Flexural Performance of Reinforced Concrete Beams Made by Using Recycled Block Aggregates and Fibers. *Innovative Infrastructure Solutions* **2021**, *6*, doi:10.1007/s41062-020-00402-y.
1263. Tran, V.-L. A New Framework for Damage Detection of Steel Frames Using Burg Autoregressive and Stacked Autoencoder-Based Deep Neural Network. *Innovative Infrastructure Solutions* **2022**, *7*, doi:10.1007/s41062-022-00888-8.
1264. Frost, K.; Hua, I. Regionalized Chemical Footprint Method to Identify Aquatic Ecotoxicity Hotspots of Hard Disk Drive Rare-Earth Magnets. *Integrated Environmental Assessment and Management* **2022**, doi:10.1002/ieam.4631.
1265. Hao, H.-H.; Liu, P.; Su, P.; Chen, T.; Zhu, M.; Jiang, Z.-B.; Li, J.-P.; Feng, D.-Q. Sea-Trial Research on Natural Product-Based Antifouling Paint Applied to Different Underwater Sensor Housing Materials. *International Biodeterioration and*

- Biodegradation* **2022**, *170*, doi:10.1016/j.ibiod.2022.105400.
1266. Gabr, A.S.A.-H. Behavior of Steel Fiber Recycled Coarse Aggregate Reinforced Concrete Subjected to Direct Shear. *International Journal of Advanced Science and Technology* **2020**, *29*, 1297–1310.
1267. Harisivasri Phanindra, K.; Ramakrishna, G.; Jagadeesh, Y.; Anand Kumar, N.; Babu Rajendra, V.; Venkateswaralu, V.; Sivapirakasam, S.P. Experimental Study on the Change in Hardness of Structural Steel (SA 516) Post Fire Accidents. *International Journal of Advanced Science and Technology* **2020**, *29*, 2315–2320.
1268. Nagaveni, P.; Charles, A.; Navin Sam, D. Reactive Power Management in Steel Industry - A Case Study. *International Journal of Advanced Science and Technology* **2020**, *29*, 548–556.
1269. Rohimi, R.; Wan Ismail, W.O.A.S.; Awang, R.; Rizman, Z.I.; Mazlan, M. Design and Prototype Development of Automated Greenhouse with Arduino and (IoT) Application. *International Journal of Advanced Science and Technology* **2019**, *28*, 437–446.
1270. Sruthi, R.; Rampradheep, G.S.; Raja, K. A Review on Natural Plant Extract as a Green Inhibitor for Steel Corrosion Resistance. *International Journal of Advanced Science and Technology* **2020**, *29*, 3529–3550.
1271. Makhija, S.P.; Dubey, S.P. Feasibility Analysis of Distributed Solar Electricity Penetration in Cement Manufacturing Plants. *International Journal of Ambient Energy* **2019**, *40*, 218–227, doi:10.1080/01430750.2017.1378719.
1272. Chauhan, D.S.; Mouaden, K.E.; Quraishi, M.A.; Bazzi, L. Aminotriazolethiol-Functionalized Chitosan as a Macromolecule-Based Bioinspired Corrosion Inhibitor for Surface Protection of Stainless Steel in 3.5% NaCl. *International Journal of Biological Macromolecules* **2020**, *152*, 234–241, doi:10.1016/j.ijbiomac.2020.02.283.
1273. Das, S.; Patra, P.; Singha, K.; Biswas, P.; Sarkar, S.; Pal, S. Graft Copolymeric Flocculant Using Functionalized Starch towards Treatment of Blast Furnace Effluent. *International Journal of Biological Macromolecules* **2019**, *125*, 35–40, doi:10.1016/j.ijbiomac.2018.12.026.
1274. Joz Majidi, H.; Mirzaee, A.; Jafari, S.M.; Amiri, M.; Shahrousvand, M.; Babaei, A. Fabrication and Characterization of Graphene Oxide-Chitosan-Zinc Oxide Ternary Nano-Hybrids for the Corrosion Inhibition of Mild Steel. *International Journal of Biological Macromolecules* **2020**, *148*, 1190–1200, doi:10.1016/j.ijbiomac.2019.11.060.
1275. Mahmoud, M.E.; Nabil, G.M.; Zaki, M.M.; Saleh, M.M. Starch Functionalization of Iron Oxide By-Product from Steel Industry as a Sustainable Low Cost Nanocomposite for Removal of Divalent Toxic Metal Ions from Water. *International Journal of Biological Macromolecules* **2019**, *137*, 455–468, doi:10.1016/j.ijbiomac.2019.06.170.
1276. Ye, Z.; Huang, K.; Xie, M.; Yu, H.; Yang, F.; Gao, M.; Wang, R.; Han, L.; Wu, F. Eco-Friendly, Cost-Effective, and Durable Guar Gum/Citric Acid Complex Coating on Mesh for Oil/Water Separation. *International Journal of Biological*

- Macromolecules* **2020**, *153*, 641–649, doi:10.1016/j.ijbiomac.2020.03.023.
1277. Duan, Y.; Han, Z.; Mu, H. Research on the Influence of Product Differentiation and Emission Reduction Policy on CO<sub>2</sub> Emissions of China's Iron and Steel Industry. *International Journal of Climate Change Strategies and Management* **2020**, *12*, 717–737, doi:10.1108/IJCCSM-06-2020-0068.
1278. Duan, Y.; Han, Z.; Zhang, H.; Wang, H. Research on the Applicability and Impact of CO<sub>2</sub> Emission Reduction Policies on China's Steel Industry. *International Journal of Climate Change Strategies and Management* **2021**, *13*, 352–374, doi:10.1108/IJCCSM-02-2021-0020.
1279. Awn, S.H.A.; Abbas, H.O. Recycling of Construction Waste Concrete as a Stabilizer for Gypseous Soils. *International Journal of Design and Nature and Ecodynamics* **2022**, *17*, 401–406, doi:10.18280/ij dne.170310.
1280. Acikel, H. EXPERIMENTAL STUDY ON THE EFFECT OF CARBON BLACK ON MECHANICAL PROPERTIES OF MORTAR SAMPLES. *International Journal of Ecosystems and Ecology Science* **2019**, *9*, 671–676, doi:10.31407/ije es9411.
1281. Manana, M.; Zobaa, A.F.; Vaccaro, A.; Arroyo, A.; Martinez, R.; Castro, P.; Laso, A.; Bustamante, S. Increase of Capacity in Electric Arc-Furnace Steel Mill Factories by Means of a Demand-Side Management Strategy and Ampacity Techniques. *International Journal of Electrical Power and Energy Systems* **2021**, *124*, doi:10.1016/j.ijepes.2020.106337.
1282. Meyberg, R.A.; Absi Salas, F.M.; Domingues, L.A.M.C.; Correia de Barros, M.T.; Lima, A.C.S. Experimental Study on the Transformer Effect in an ACSR Cable. *International Journal of Electrical Power and Energy Systems* **2020**, *119*, doi:10.1016/j.ijepes.2020.105861.
1283. Abraham, V.A.A.; Causil, E.D.A.; Santos, V.S.; Angarita, E.N.; Sarduy, J.R.G. Identification of Savings Opportunities in a Steel Manufacturing Industry. *International Journal of Energy Economics and Policy* **2021**, *11*, 43–50, doi:10.32479/ijee p.11142.
1284. Gołaś, Z. The Driving Forces of Change in Energy-Related CO<sub>2</sub> Emissions in the Polish Iron and Steel Industry in 1990–2017. *International Journal of Energy Economics and Policy* **2020**, *10*, 94–102, doi:10.32479/ijee p.9444.
1285. Ho, V.-C.; Oh, S.H.; Mun, J. A Binder-Free Bivalent Manganese Oxide Cathode Elective Structure with High Activity in Aqueous Zinc Ion Batteries. *International Journal of Energy Research* **2022**, *46*, 9720–9732, doi:10.1002/er.7841.
1286. Kazemiani-Najafabadi, P.; Amiri Rad, E.; Deymi-Dashtebayaz, M. Presenting and Optimization of a Novel Ammonia-Water Combined Power and Compression Cooling System. *International Journal of Energy Research* **2022**, *46*, 20886–20900, doi:10.1002/er.8761.
1287. Kumar, N.; Tomar, M. Influence of Nanoadditives on Ignition Characteristics of Kusum (Schleichera Oleosa) Biodiesel. *International Journal of Energy Research* **2019**, *43*, 3223–3236, doi:10.1002/er.4446.
1288. Na, H.; Du, T.; Sun, W.; He, J.; Sun, J.; Yuan, Y.; Qiu, Z. Review of Evaluation



- Methodologies and Influencing Factors for Energy Efficiency of the Iron and Steel Industry. *International Journal of Energy Research* **2019**, *43*, 5659–5677, doi:10.1002/er.4623.
1289. Okonkwo, P.C.; Otor, C. A Review of Gas Diffusion Layer Properties and Water Management in Proton Exchange Membrane Fuel Cell System. *International Journal of Energy Research* **2021**, *45*, 3780–3800, doi:10.1002/er.6227.
1290. Perić, M.; Garašić, I.; Tonković, Z.; Vuherer, T.; Nižetić, S.; Dedić-Jandrek, H. Numerical Prediction and Experimental Validation of Temperature and Residual Stress Distributions in Buried-Arc Welded Thick Plates. *International Journal of Energy Research* **2019**, *43*, 3590–3600, doi:10.1002/er.4506.
1291. Ebenezer, S.; Arunraj, E.; Hemalatha, G. Analytical Behaviour on External Beam Column Joint Using Steel Mesh. *International Journal of Engineering and Advanced Technology* **2019**, *8*, 410–413.
1292. Jha, E.; Dutta, S.K. Optimization of Binder for Improving Strength and Shatter Index of Briquettes for BOF Dust Using Design of Experiments. *International Journal of Engineering and Advanced Technology* **2019**, *9*, 6282–6287, doi:10.35940/ijeat.A9366.109119.
1293. Karthikeyan, D. Research on Metal Doped Zeolite as Catalyst to Reduce NOX Emission from Lean Burn Gasoline Engines. *International Journal of Engineering and Advanced Technology* **2019**, *8*, 201–206, doi:10.35940/ijeat.E1047.0785S319.
1294. Srija, J.; Abirami, R.; Kethireddy, M. Mechanical Behaviour of Steel Fibers Added High Strength Concrete with GGBS and Silica Fume Replacements. *International Journal of Engineering and Advanced Technology* **2019**, *9*, 4449–4452, doi:10.35940/ijeat.A1602.109119.
1295. Bsisu, K.A.-D.; Salem, Z.A. Recycling of Steel Bars from Demolished Structures. *International Journal of Engineering Research and Technology* **2020**, *13*, 94–99.
1296. Dorr, B.J.; Kanali, C.L.; Onchiri, R.O. Shear Performance of Recycled Tyres Steel Fibres Reinforced Lightweight Concrete Beam Using Palm Kernel Shear as Partial Replacement of Coarse Aggregate. *International Journal of Engineering Research and Technology* **2019**, *12*, 1818–1823.
1297. Protopopov, E.; Malenko, P.; Dobrykh, S.; Golosman, E.; Efremov, V.; Zhenaeva, E.; Protopopov, A. Basics of Hybrid Energy-Metallurgical and Catalytic Technology of Synthetic Methane Production. *International Journal of Engineering Research and Technology* **2019**, *12*, 2179–2184.
1298. Bartos, A.; Niedzielski, P.; Buczylo, K.; Leszczynska, J. Nickel Chelate Complexes as a Target for Polyclonal Antibodies Raised in Rabbits and Mice. *International Journal of Environmental Analytical Chemistry* **2021**, *101*, 1878–1893, doi:10.1080/03067319.2019.1691179.
1299. Changmai, M.; Das, P.P.; Mondal, P.; Pasawan, M.; Sinha, A.; Biswas, P.; Sarkar, S.; Purkait, M.K. Hybrid Electrocoagulation–Microfiltration Technique for Treatment of Nanofiltration Rejected Steel Industry Effluent. *International Journal of Environmental Analytical Chemistry* **2022**, *102*, 62–83,

- doi:10.1080/03067319.2020.1715381.
1300. Gonzalo, N.; Rey, M.; Fontanals, S.; Quer, N.; Clopés, A.; Muñoz, C. Simultaneous Determination of Five Cytotoxic Drugs in Surface Wiped Samples Using Liquid Chromatography and Tandem Mass Spectrometry for the Control of Environmental Contamination in a Comprehensive Cancer Centre. *International Journal of Environmental Analytical Chemistry* **2022**, doi:10.1080/03067319.2022.2070013.
1301. Mahdavianpour, M.; Pourakbar, M.; Alavi, N.; Masihi, N.; Mirzaei, F.; Aghayani, E. Biodiesel Production from Waste Frying Oils in the Presence of Zeolite Synthesized from Steel Furnace Slag. *International Journal of Environmental Analytical Chemistry* **2020**, doi:10.1080/03067319.2020.1863957.
1302. Masihi, N.; Alavi, N.; Zamanzadeh, M.; Majlessi Nasr, M.; Eslami, A.; Zenouzi, A.; Aghayani, E.; Bakhshoodeh, R. Application of Converter Slag as an Effective and Low-Cost Solid Base Catalyst for the Transesterification Process. *International Journal of Environmental Analytical Chemistry* **2021**, doi:10.1080/03067319.2021.2012569.
1303. Samanta, N.S.; Das, P.P.; Mondal, P.; Bora, U.; Purkait, M.K. Physico-Chemical and Adsorption Study of Hydrothermally Treated Zeolite A and FAU-Type Zeolite X Prepared from LD (Linz–Donawitz) Slag of the Steel Industry. *International Journal of Environmental Analytical Chemistry* **2022**, doi:10.1080/03067319.2022.2079082.
1304. Tahir, M.; Nawaz, T.; Nabi, G.; Sagir, M.; Khan, M.; Malik, N. Role of Nanophotocatalysts for the Treatment of Hazardous Organic and Inorganic Pollutants in Wastewater. *International Journal of Environmental Analytical Chemistry* **2022**, 102, 491–515, doi:10.1080/03067319.2020.1723570.
1305. Abba, M.U.; Man, H.C.; Azis, R.S.; Idris, A.I.; Hamzah, M.H.; Abdulsalam, M. Synthesis of Nano-Magnetite from Industrial Mill Chips for the Application of Boron Removal: Characterization and Adsorption Efficacy. *International Journal of Environmental Research and Public Health* **2021**, 18, 1–18, doi:10.3390/ijerph18041400.
1306. Abecasis, L.; Gamelas, C.A.; Justino, A.R.; Dionísio, I.; Canha, N.; Kertesz, Z.; Almeida, S.M. Spatial Distribution of Air Pollution, Hotspots and Sources in an Urban-Industrial Area in the Lisbon Metropolitan Area, Portugal—A Biomonitoring Approach. *International Journal of Environmental Research and Public Health* **2022**, 19, doi:10.3390/ijerph19031364.
1307. Campo, L.; Hanchi, M.; Sucato, S.; Consonni, D.; Polledri, E.; Olgiati, L.; Saidane-Mosbahi, D.; Fustinoni, S. Biological Monitoring of Occupational Exposure to Metals in Electric Steel Foundry Workers and Its Contribution to 8-Oxo-7,8-Dihydro-2'-Deoxyguanosine Levels. *International Journal of Environmental Research and Public Health* **2020**, 17, doi:10.3390/ijerph17061811.
1308. Campos, É.; Freire, C.; Barbosa, F.; Lemos, C.; Saraceni, V.; Koifman, R.J.; Pinheiro, R.D.N.; da Silva, I.F. Biomonitoring of Exposure to Metals in a Population Residing in an Industrial Area in Brazil: A Feasibility Study. *International Journal*

- of *Environmental Research and Public Health* **2021**, *18*, doi:10.3390/ijerph182312455.
1309. Cavaguchi, A.M.S.; Oliveira, M.R.; Macedo, C.G.; De Souza, P.E.A.; Aguiar, A.F.; Dallaire, M.; Ngomo, S.; Da Silva, R.A. Impact of Lifting of Two Types of Barrels on Postural Control, Trunk Muscle Recruitment, and Kinematic Measures in Manual Workers. *International Journal of Environmental Research and Public Health* **2019**, *16*, doi:10.3390/ijerph16122183.
1310. Dabrowska, J.; Sobota, M.; Swiader, M.; Borowski, P.; Moryl, A.; Stodolak, R.; Kucharczak, E.; Zieba, Z.; Kazak, J.K. Marine Waste-Sources, Fate, Risks, Challenges and Research Needs. *International Journal of Environmental Research and Public Health* **2021**, *18*, 1–17, doi:10.3390/ijerph18020433.
1311. Ek, K.; Mathern, A.; Rempling, R.; Brinkhoff, P.; Karlsson, M.; Norin, M. Life Cycle Sustainability Performance Assessment Method for Comparison of Civil Engineering Works Design Concepts: Case Study of a Bridge. *International Journal of Environmental Research and Public Health* **2020**, *17*, 1–34, doi:10.3390/ijerph17217909.
1312. Faisal, A.A.H.; Alquzweeni, S.S.; Naji, L.A.; Naushad, M. Predominant Mechanisms in the Treatment of Wastewater Due to Interaction of Benzaldehyde and Iron Slag Byproduct. *International Journal of Environmental Research and Public Health* **2020**, *17*, doi:10.3390/ijerph17010226.
1313. Fernández-Ruiz, J.; Medina Rodríguez, L.E.; Costa, P.A. Use of Tyre-Derived Aggregate as Backfill Material for Wave Barriers to Mitigate Railway-Induced Ground Vibrations. *International Journal of Environmental Research and Public Health* **2020**, *17*, 1–22, doi:10.3390/ijerph17249191.
1314. Hartung, V.; Sarshar, M.; Karle, V.; Shammas, L.; Rashid, A.; Roullier, P.; Eilers, C.; Mäurer, M.; Flachenecker, P.; Pfeifer, K.; et al. Validity of Consumer Activity Monitors and an Algorithm Using Smartphone Data for Measuring Steps during Different Activity Types. *International Journal of Environmental Research and Public Health* **2020**, *17*, 1–16, doi:10.3390/ijerph17249314.
1315. Kim, G.; Park, S. Chloride Removal of Calcium Aluminate-Layered Double Hydroxide Phases: A Review. *International Journal of Environmental Research and Public Health* **2021**, *18*, doi:10.3390/ijerph18062797.
1316. Kim, G.; Park, S.; Kwak, D. Is It Possible to Predict the Concentration of Natural Volatile Organic Compounds in Forest Atmosphere? *International Journal of Environmental Research and Public Health* **2020**, *17*, doi:10.3390/ijerph17217875.
1317. Kim, J.; Tseren, B. Occupational Alara Planning for Reactor Pressure Vessel Dismantling at Kori Unit 1. *International Journal of Environmental Research and Public Health* **2020**, *17*, 1–11, doi:10.3390/ijerph17155346.
1318. Li, M.; Wang, R.; Li, G.; Song, X.; Yang, H.; Lai, H. Comprehensive Chemical Dust Suppressant Performance Evaluation and Optimization Method. *International Journal of Environmental Research and Public Health* **2022**, *19*, doi:10.3390/ijerph19095617.
1319. Liu, H.; Guo, R.; Tian, J.; Sun, H.; Wang, Y.; Li, H.; Yao, L. Quantifying the Carbon

- Reduction Potential of Recycling Construction Waste Based on Life Cycle Assessment: A Case of Jiangsu Province. *International Journal of Environmental Research and Public Health* **2022**, *19*, doi:10.3390/ijerph191912628.
1320. Ma, X.; Xiao, Z.; He, L.; Shi, Z.; Cao, Y.; Tian, Z.; Vu, T.; Liu, J. Chemical Composition and Source Apportionment of PM 2.5 in Urban Areas of Xiangtan, Central South China. *International Journal of Environmental Research and Public Health* **2019**, *16*, doi:10.3390/ijerph16040539.
1321. Michelini, Z.; Mazzei, C.; Magurano, F.; Baggieri, M.; Marchi, A.; Andreotti, M.; Cara, A.; Gaudino, A.; Mazzalupi, M.; Antonelli, F.; et al. Ultraviolet Sanitizing System for Sterilization of Ambulances Fleets and for Real-Time Monitoring of Their Sterilization Level. *International Journal of Environmental Research and Public Health* **2022**, *19*, doi:10.3390/ijerph19010331.
1322. Milani, C.J.; Yepes, V.; Kripka, M. Proposal of Sustainability Indicators for the Design of Small-Span Bridges. *International Journal of Environmental Research and Public Health* **2020**, *17*, 1–23, doi:10.3390/ijerph17124488.
1323. Ogungbile, A.J.; Shen, G.Q.; Wuni, I.Y.; Xue, J.; Hong, J. A Hybrid Framework for Direct Co2 Emissions Quantification in China's Construction Sector. *International Journal of Environmental Research and Public Health* **2021**, *18*, doi:10.3390/ijerph182211965.
1324. Olowoyo, J.; Lion, N.; Unathi, T.; Oladeji, O. Concentrations of Pb and Other Associated Elements in Soil Dust 15 Years after the Introduction of Unleaded Fuel and the Human Health Implications in Pretoria, South Africa. *International Journal of Environmental Research and Public Health* **2022**, *19*, doi:10.3390/ijerph191610238.
1325. Palmisani, J.; Gilio, A.D.; Franchini, S.A.; Cotugno, P.; Miniero, D.V.; D'ambrosio, P.; de Gennaro, G. Particle-Bound PAHs and Elements in a Highly Industrialized City in Southern Italy: PM2.5 Chemical Characterization and Source Apportionment after the Implementation of Governmental Measures for Air Pollution Mitigation and Control. *International Journal of Environmental Research and Public Health* **2020**, *17*, 1–25, doi:10.3390/ijerph17134843.
1326. Riccelli, M.G.; Goldoni, M.; Poli, D.; Mozzoni, P.; Cavallo, D.; Corradi, M. Welding Fumes, a Risk Factor for Lung Diseases. *International Journal of Environmental Research and Public Health* **2020**, *17*, doi:10.3390/ijerph17072552.
1327. Rodgers, K.; McLellan, I.; Cuthbert, S.; Torres, V.M.; Hursthouse, A. The Potential of Remedial Techniques for Hazard Reduction of Steel Process by Products: Impact on Steel Processing, Waste Management, the Environment and Risk to Human Health. *International Journal of Environmental Research and Public Health* **2019**, *16*, doi:10.3390/ijerph16122093.
1328. Suzuki, N.; Nakaoka, H.; Eguchi, A.; Hanazato, M.; Nakayama, Y.; Tsumura, K.; Takaguchi, K.; Takaya, K.; Todaka, E.; Mori, C. Concentrations of Formic Acid, Acetic Acid, and Ammonia in Newly Constructed Houses. *International Journal of Environmental Research and Public Health* **2020**, *17*, doi:10.3390/ijerph17061940.
1329. Suzuki, N.; Nakaoka, H.; Hanazato, M.; Nakayama, Y.; Tsumura, K.; Takaya, K.;

- Todaka, E.; Mori, C. Indoor Air Quality Analysis of Newly Built Houses. *International Journal of Environmental Research and Public Health* **2019**, *16*, doi:10.3390/ijerph16214142.
1330. Wang, T.; Li, K.; Liu, D.; Yang, Y.; Wu, D. Estimating the Carbon Emission of Construction Waste Recycling Using Grey Model and Life Cycle Assessment: A Case Study of Shanghai. *International Journal of Environmental Research and Public Health* **2022**, *19*, doi:10.3390/ijerph19148507.
1331. Yang, T.; Liu, W. Health Effects of Energy Intensive Sectors and the Potential Health Co-Benefits of a Low Carbon Industrial Transition in China. *International Journal of Environmental Research and Public Health* **2019**, *16*, doi:10.3390/ijerph16173022.
1332. Ye, H.; Li, Q.; Yu, H.; Xiang, L.; Wei, J.; Lin, F. Pyrolysis Behaviors and Residue Properties of Iron-Rich Rolling Sludge from Steel Smelting. *International Journal of Environmental Research and Public Health* **2022**, *19*, doi:10.3390/ijerph19042152.
1333. Ye, P.; Xia, S.; Xiong, Y.; Liu, C.; Li, F.; Liang, J.; Zhang, H. Did an Ultra-Low Emissions Policy on Coal-Fueled Thermal Power Reduce the Harmful Emissions? Evidence from Three Typical Air Pollutants Abatement in China. *International Journal of Environmental Research and Public Health* **2020**, *17*, 1–19, doi:10.3390/ijerph17228555.
1334. Zhang, J.; Rong, Y.; Yin, Q.; Zhang, P.; Zhao, L.; Chen, C. Spatiotemporal Variation and Influencing Factors of TSP and Anions in Coastal Atmosphere of Zhanjiang City, China. *International Journal of Environmental Research and Public Health* **2022**, *19*, doi:10.3390/ijerph19042030.
1335. Zhou, Z.W.; Alcalá, J.; Yepes, V. Bridge Carbon Emissions and Driving Factors Based on a Life-Cycle Assessment Case Study: Cable-Stayed Bridge over Hun He River in Liaoning, China. *International Journal of Environmental Research and Public Health* **2020**, *17*, 1–22, doi:10.3390/ijerph17165953.
1336. Buadit, T.; Rattanapan, C.; Ussawarujikulchai, A.; Suchiva, K.; Papong, S.; Ma, H.-W. Life Cycle Assessment of Material Recovery from Pyrolysis Process of End-of-Life Tires in Thailand. *International Journal of Environmental Science and Development* **2020**, *11*, 493–498, doi:10.18178/ijesd.2020.11.10.1296.
1337. Al-Dabbous, A.N.; Khan, A.R.; Al-Tamimi, S.A.; Shalash, M.; Bajoga, A.D.; Malek, M.J. Oxides of Carbon, Particulate Matters and Volatile Organic Compounds Impact on Indoor Air Quality during Waterpipe Smoking. *International Journal of Environmental Science and Technology* **2019**, *16*, 2849–2854, doi:10.1007/s13762-018-1870-0.
1338. Asadollahi, A.; Tohidi, H.; Shoja, A. Sustainable Waste Management Scenarios for Food Packaging Materials Using SimaPro and WARM. *International Journal of Environmental Science and Technology* **2022**, *19*, 9479–9494, doi:10.1007/s13762-022-04327-0.
1339. Baalamurugan, J.; Ganesh Kumar, V.; Naveen Prasad, B.S.N.; Padmapriya, R.; Karthick, V.; Govindaraju, K. Recycling of Induction Furnace Steel Slag in

- Concrete for Marine Environmental Applications towards Ocean Acidification Studies. *International Journal of Environmental Science and Technology* **2022**, *19*, 5039–5048, doi:10.1007/s13762-021-03362-7.
1340. Behforouz, B.; Balkanlou, V.; Naseri, F.; Kasehchi, E.; Mohseni, E.; Ozbakkaloglu, T. Investigation of Eco-Friendly Fiber-Reinforced Geopolymer Composites Incorporating Recycled Coarse Aggregates. *International Journal of Environmental Science and Technology* **2020**, *17*, 3251–3260, doi:10.1007/s13762-020-02643-x.
1341. Boenzi, F. Possible Ecological Advantages from Use of Carbonless Magnesite Refractory Bricks in Secondary Steelmaking: A Framework LCA Perspective. *International Journal of Environmental Science and Technology* **2022**, *19*, 5877–5896, doi:10.1007/s13762-021-03553-2.
1342. Chand, S.; Chand, S.K.; Paul, B.; Kumar, M. Long-Term Leaching Assessment of Constituent Elements from Linz–Donawitz Slag of Major Steel Industries in India. *International Journal of Environmental Science and Technology* **2019**, *16*, 6397–6404, doi:10.1007/s13762-018-2025-z.
1343. Maleki Rizi, M.H.; Aghabarari, B.; Alizadeh, M.; Khanlarkhani, A.; Martinez Huerta, M.V. The Role of Cobalt and Copper Nanoparticles on Performance of Magnetite-Rich Waste Material in Fenton Reaction. *International Journal of Environmental Science and Technology* **2019**, *16*, 373–382, doi:10.1007/s13762-017-1579-5.
1344. Marcinkowski, A.; Gralewski, J. The Comparison of the Environmental Impact of Steel and Vinyl Sheet Piling: Life Cycle Assessment Study. *International Journal of Environmental Science and Technology* **2020**, *17*, 4019–4030, doi:10.1007/s13762-020-02750-9.
1345. Mercado-Borrayo, B.; Solis-Lopez, M.; Schouwenaars, R.; Ramirez-Zamora, R. Application of Metallurgical Slag to Treat Geothermal Wastewater with High Concentrations of Arsenic and Boron. *International Journal of Environmental Science and Technology* **2019**, *16*, 2373–2384, doi:10.1007/s13762-018-1952-z.
1346. Ramadan, A.; Yassin, M.F.; Alshammari, B.Z. Health Risk Assessment Associated with Volatile Organic Compounds in a Parking Garage. *International Journal of Environmental Science and Technology* **2019**, *16*, 2549–2564, doi:10.1007/s13762-018-1641-y.
1347. Sadeghi, N.; Alamdari, E.K. An Innovative Method for Recycling Vanadium and Valuable Materials from High-Lime Steel Making Slag Disposal. *International Journal of Environmental Science and Technology* **2021**, *18*, 2597–2606, doi:10.1007/s13762-020-03020-4.
1348. Taghavi Kalajahi, S.; Rasekh, B.; Yazdian, F.; Neshati, J.; Taghavi, L. Graphene Oxide/Silver Nanostructure as a Green Anti-Biofouling Composite toward Controlling the Microbial Corrosion. *International Journal of Environmental Science and Technology* **2021**, *18*, 195–210, doi:10.1007/s13762-020-02846-2.
1349. Tavakoli, H.; Azari, A.; Ashrafi, K.; Salimian, M.; Momeni, M. Human Health Risk Assessment of Arsenic Downstream of a Steel Plant in Isfahan, Iran: A Case Study.

- International Journal of Environmental Science and Technology* **2020**, *17*, 81–92, doi:10.1007/s13762-019-02429-w.
1350. Yi, Z.; Qin, J.; Deng, Z.; Liu, Q. Prediction NO<sub>x</sub> Emission from Sintering Plant with a Radial Basis Function and Back Propagation Hybrid Neural Network. *International Journal of Environmental Science and Technology* **2022**, *19*, 5049–5058, doi:10.1007/s13762-021-03379-y.
1351. Zaitsev, G.A.; Dubrovina, O.A.; Kulagin, A.Y.; Shainurov, R.I. Cadmium and Zinc Migration in Scots Pine Stands Growing in Contaminated Areas from Metallurgical Plant Emissions. *International Journal of Environmental Science and Technology* **2021**, *18*, 3625–3634, doi:10.1007/s13762-020-03104-1.
1352. Zarei, A.; Rashidi, A.; Saber Tehrani, M.; Aberoomand Azar, P. Molecular-Sieve Porous Graphene as a Steady Phase of Gas Chromatography Column for Dissociation and Measurement of Nitrous Oxide, Carbon Dioxide and Gaseous Hydrocarbons. *International Journal of Environmental Science and Technology* **2019**, *16*, 3049–3060, doi:10.1007/s13762-018-1670-6.
1353. De Campos, G.B.; Brighenti, C.; Tomita, J.T. Exergy-Based Parallel between Steam- A Nd Combined-Cycle Power Plant Configurations Burning Blast Furnace Gas. *International Journal of Exergy* **2019**, *29*, 89–108, doi:10.1504/IJEX.2019.099717.
1354. Ahmed, M.A.; Chkheiw, A.H.; Alhamaidah, A. STRUCTURAL TORSIONAL RESPONSE BEHAVIOR AND PREDICTION FOR STEEL FIBER-RECYCLED AGGREGATE CONCRETE BEAMS. *International Journal of GEOMATE* **2021**, *21*, 1–10, doi:10.21660/2021.87.j2225.
1355. Chinh, L.M. CRACKING OF STEEL GIRDER OF THE VAM CONG BRIDGE -THE INCIDENT CAN BE AVOIDED DURING THE CONSTRUCTION STAGE. *International Journal of GEOMATE* **2021**, *21*, 44–53, doi:10.21660/2021.85.j2206.
1356. Chinh, L.M. PROPOSED SHM SYSTEM WITH ACOUSTIC EMISSION (AE) TECHNOLOGY FOR TRAN HOANG NA STEEL ARCH BRIDGE. *International Journal of GEOMATE* **2021**, *21*, 210–219, doi:10.21660/2021.84.j2190.
1357. Dong, P.H.; Quynh, V.M. PERFORMANCE OF CONSOLIDATION TECHNIQUES FOR IMPROVEMENT OF NEWLY DEPOSITED DREDGED MUD BY SCALE MODEL TEST. *International Journal of GEOMATE* **2020**, *19*, 134–140, doi:10.21660/2020.76.55005.
1358. Kristiyanto, H.; Triwiyono, A.; Muslikh; Saputra, A. The Behavior of the Welding Connection Models between Reinforcing Steel and Steel Plate. *International Journal of GEOMATE* **2020**, *19*, 156–162, doi:10.21660/2020.73.17648.
1359. Limphitakphong, N.; Thaipradit, P.; Kanchanapiya, P.; Tantisattayakul, T.; Chavalparit, O. EMBODIED CARBON EMISSIONS OF CONSTRUCTION MATERIALS: A CASE STUDY OF BUILDINGS IN THAILAND. *International Journal of GEOMATE* **2020**, *18*, 187–193, doi:10.21660/2020.68.9418.
1360. Malik, A.A.; Dora, G.; Derar, R.; Naeem, M. Diaphragm Wall Supported by Ground Anchors and Inclined Struts: A Case Study. *International Journal of GEOMATE* **2019**, *16*, 150–156, doi:10.21660/2019.57.8170.

1361. Mohamad, H.M.; Bolong, N.; Saad, I.; Gungat, L.; Tioon, J.; Pileh, R.; Delton, M. MANUFACTURE OF CONCRETE PAVER BLOCK USING WASTE MATERIALS AND BY-PRODUCTS: A REVIEW. *International Journal of GEOMATE* **2022**, *22*, 9–19, doi:10.21660/2022.93.j2363.
1362. Peera, I.; Oukaili, N. Methodology for Monitoring the Flexural Behavior of Structural Concrete Members with Unbonded Internal Steel. *International Journal of GEOMATE* **2020**, *18*, 9–17, doi:10.21660/2020.69.5534.
1363. Villacreses, J.P.; Caicedo, B.; Ibagón, L.; Yepez, F.; Puebla, J.S. AN EVALUATION OF SOLITARY WAVES FOR COMPACTION CONTROL ON FINE-GRAINED SOILS. *International Journal of GEOMATE* **2021**, *21*, 54–60, doi:10.21660/2021.85.j2208.
1364. El Naggar, H.; Ashari, M.; Mahgoub, A. Development of an Empirical Hyperbolic Material Model for TDA Utilizing Large-Scale Triaxial Testing. *International Journal of Geotechnical Engineering* **2022**, *16*, 133–142, doi:10.1080/19386362.2021.1902118.
1365. Reddy, K.R.; Amaya-Santos, G.; Yargicoglu, E.; Cooper, D.E.; Negri, M.C. Phytoremediation of Heavy Metals and PAHs at Slag Fill Site: Three-Year Field-Scale Investigation. *International Journal of Geotechnical Engineering* **2019**, *13*, 32–47, doi:10.1080/19386362.2017.1318231.
1366. Brooks, M.; Abdellatif, M.; Alkhaddar, R. Application of Life Cycle Carbon Assessment for a Sustainable Building Design: A Case Study in the UK. *International Journal of Green Energy* **2021**, *18*, 351–362, doi:10.1080/15435075.2020.1865360.
1367. Chakma, B.; Serto, L.; Kharpude, S.; Narale, P.; Seveda, M.S. Life Cycle Assessment Analysis, Embodied Energy Evaluation and Economic Aspect Study of Double Mirror Reflector Box Type Solar Cooker for NEH Region of Sikkim. *International Journal of Green Energy* **2022**, *19*, 1005–1022, doi:10.1080/15435075.2021.1978446.
1368. Biermann, M.; Ali, H.; Sundqvist, M.; Larsson, M.; Normann, F.; Johnsson, F. Excess Heat-Driven Carbon Capture at an Integrated Steel Mill – Considerations for Capture Cost Optimization. *International Journal of Greenhouse Gas Control* **2019**, *91*, doi:10.1016/j.ijggc.2019.102833.
1369. Chai, S.Y.W.; Ngu, L.H.; How, B.S.; Chin, M.Y.; Abdouka, K.; Adini, M.J.B.A.; Kassim, A.M. Review of CO<sub>2</sub> Capture in Construction-Related Industry and Their Utilization. *International Journal of Greenhouse Gas Control* **2022**, *119*, doi:10.1016/j.ijggc.2022.103727.
1370. Cui, G.; Yang, Z.; Liu, J.; Li, Z. A Comprehensive Review of Metal Corrosion in a Supercritical CO<sub>2</sub> Environment. *International Journal of Greenhouse Gas Control* **2019**, *90*, doi:10.1016/j.ijggc.2019.102814.
1371. d’Amore, F.; Romano, M.C.; Bezzo, F. Optimal Design of European Supply Chains for Carbon Capture and Storage from Industrial Emission Sources Including Pipe and Ship Transport. *International Journal of Greenhouse Gas Control* **2021**, *109*,



- doi:10.1016/j.ijggc.2021.103372.
1372. Di Maria, A.; Snellings, R.; Alaert, L.; Quaghebeur, M.; Van Acker, K. Environmental Assessment of CO<sub>2</sub> Mineralisation for Sustainable Construction Materials. *International Journal of Greenhouse Gas Control* **2020**, *93*, doi:10.1016/j.ijggc.2019.102882.
1373. Duguid, A.; Guo, B.; Nygaard, R.; Ramakrishnan, T.S.; Chugunov, N. Monitoring Well Integrity at the Cranfield Field Phase III CO<sub>2</sub> Storage Project. *International Journal of Greenhouse Gas Control* **2021**, *109*, doi:10.1016/j.ijggc.2021.103341.
1374. Eliasson, Å.; Fahrman, E.; Biermann, M.; Normann, F.; Harvey, S. Efficient Heat Integration of Industrial CO<sub>2</sub> Capture and District Heating Supply. *International Journal of Greenhouse Gas Control* **2022**, *118*, doi:10.1016/j.ijggc.2022.103689.
1375. Farabi-Asl, H.; Itaoka, K.; Chapman, A.; Kato, E.; Kurosawa, A. Key Factors for Achieving Emission Reduction Goals Cognizant of CCS. *International Journal of Greenhouse Gas Control* **2020**, *99*, doi:10.1016/j.ijggc.2020.103097.
1376. Fimbres Weihs, G.A.; Ho, M.; Kambanis, J.; Wiley, D.E. Scoping Study of the Economics of CO<sub>2</sub> Transport and Storage Options for Steel Manufacturing Emissions in Eastern Australia. *International Journal of Greenhouse Gas Control* **2022**, *114*, doi:10.1016/j.ijggc.2022.103592.
1377. Garcia, M.; Berghout, N. Toward a Common Method of Cost-Review for Carbon Capture Technologies in the Industrial Sector: Cement and Iron and Steel Plants. *International Journal of Greenhouse Gas Control* **2019**, *87*, 142–158, doi:10.1016/j.ijggc.2019.05.005.
1378. Grøntoft, T. Atmospheric Corrosion Due to Amine Emissions from Carbon Capture Plants. *International Journal of Greenhouse Gas Control* **2021**, *109*, doi:10.1016/j.ijggc.2021.103355.
1379. Hildor, F.; Mattisson, T.; Leion, H.; Linderholm, C.; Rydén, M. Steel Converter Slag as an Oxygen Carrier in a 12 MWth CFB Boiler – Ash Interaction and Material Evolution. *International Journal of Greenhouse Gas Control* **2019**, *88*, 321–331, doi:10.1016/j.ijggc.2019.06.019.
1380. Ibrahim, M.H.; El-Naas, M.H.; Zevenhoven, R.; Al-Sobhi, S.A. Enhanced CO<sub>2</sub> Capture through Reaction with Steel-Making Dust in High Salinity Water. *International Journal of Greenhouse Gas Control* **2019**, *91*, doi:10.1016/j.ijggc.2019.102819.
1381. Manzolini, G.; Giuffrida, A.; Cobden, P.D.; van Dijk, H.A.J.; Ruggeri, F.; Consonni, F. Techno-Economic Assessment of SEWGS Technology When Applied to Integrated Steel-Plant for CO<sub>2</sub> Emission Mitigation. *International Journal of Greenhouse Gas Control* **2020**, *94*, doi:10.1016/j.ijggc.2019.102935.
1382. Martinez Castilla, G.; Biermann, M.; Montañés, R.M.; Normann, F.; Johnsson, F. Integrating Carbon Capture into an Industrial Combined-Heat-and-Power Plant: Performance with Hourly and Seasonal Load Changes. *International Journal of Greenhouse Gas Control* **2019**, *82*, 192–203, doi:10.1016/j.ijggc.2019.01.015.
1383. Mastropasqua, L.; Pierangelo, L.; Spinelli, M.; Romano, M.C.; Campanari, S.;

- Consonni, S. Molten Carbonate Fuel Cells Retrofits for CO<sub>2</sub> Capture and Enhanced Energy Production in the Steel Industry. *International Journal of Greenhouse Gas Control* **2019**, *88*, 195–208, doi:10.1016/j.ijggc.2019.05.033.
1384. Myers, C.A.; Nakagaki, T.; Akutsu, K. Quantification of the CO<sub>2</sub> Mineralization Potential of Ironmaking and Steelmaking Slags under Direct Gas-Solid Reactions in Flue Gas. *International Journal of Greenhouse Gas Control* **2019**, *87*, 100–111, doi:10.1016/j.ijggc.2019.05.021.
1385. Pan, L.; Oldenburg, C.M. Mechanistic Modeling of CO<sub>2</sub> Well Leakage in a Generic Abandoned Well through a Bridge Plug Cement-Casing Gap. *International Journal of Greenhouse Gas Control* **2020**, *97*, doi:10.1016/j.ijggc.2020.103025.
1386. Rigamonti, L.; Brivio, E. Life Cycle Assessment of Methanol Production by a Carbon Capture and Utilization Technology Applied to Steel Mill Gases. *International Journal of Greenhouse Gas Control* **2022**, *115*, doi:10.1016/j.ijggc.2022.103616.
1387. Rochelle, G.T.; Wu, Y.; Chen, E.; Akinpelumi, K.; Fischer, K.B.; Gao, T.; Liu, C.-T.; Selinger, J.L. Pilot Plant Demonstration of Piperazine with the Advanced Flash Stripper. *International Journal of Greenhouse Gas Control* **2019**, *84*, 72–81, doi:10.1016/j.ijggc.2019.03.014.
1388. Tanzer, S.E.; Blok, K.; Ramírez, A. Can Bioenergy with Carbon Capture and Storage Result in Carbon Negative Steel? *International Journal of Greenhouse Gas Control* **2020**, *100*, doi:10.1016/j.ijggc.2020.103104.
1389. Turner, L.G.; Dawson, G.K.W.; Golding, S.D.; Pearce, J.K. CO<sub>2</sub> and NO<sub>x</sub> Reactions with CO<sub>2</sub> Storage Reservoir Core: NO<sub>x</sub> Dissolution Products and Mineral Reactions. *International Journal of Greenhouse Gas Control* **2022**, *120*, doi:10.1016/j.ijggc.2022.103750.
1390. Williams, R.; Jack, C.; Gamboa, D.; Shackley, S. Decarbonising Steel Production Using CO<sub>2</sub> Capture and Storage (CCS): Results of Focus Group Discussions in a Welsh Steel-Making Community. *International Journal of Greenhouse Gas Control* **2021**, *104*, doi:10.1016/j.ijggc.2020.103218.
1391. Yang, F.; Meerman, H.; Faaij, A. Harmonized Comparison of Virgin Steel Production Using Biomass with Carbon Capture and Storage for Negative Emissions. *International Journal of Greenhouse Gas Control* **2021**, *112*, doi:10.1016/j.ijggc.2021.103519.
1392. Ansaloni, L.; Sarić, M.; Louradour, E.; Radmanesh, F.; Dijkstra, J.W.; Pilz, M.; Høvik, D.; Benes, N.E.; van Delft, Y.; Peters, T.A. Stability Investigation of PolyPOSS-Imide Membranes for H<sub>2</sub> Purification and Their Application in the Steel Industry. *International Journal of Hydrogen Energy* **2022**, *47*, 11359–11368, doi:10.1016/j.ijhydene.2021.09.089.
1393. Barelli, L.; Bidini, G.; Di Michele, A.; Gammaitoni, L.; Mattarelli, M.; Mondì, F.; Sisani, E. Development and Validation of a Ni-Based Catalyst for Carbon Dioxide Dry Reforming of Methane Process Coupled to Solid Oxide Fuel Cells. *International Journal of Hydrogen Energy* **2019**, *44*, 16582–16593,

- doi:10.1016/j.ijhydene.2019.04.187.
1394. Bassani, A.; van Dijk, H.; Cobden, P.; Spigno, G.; Manzolini, G.; Manenti, F. Sorption Enhanced Water Gas Shift for H-2 Production Using Sour Gases as Feedstock. *International Journal of Hydrogen Energy* **2019**, *44*, 16132–16143, doi:10.1016/j.ijhydene.2019.04.199.
1395. Goldasz, A.; Matuszewska, D.; Olczak, P. Technical, Economic, and Environmental Analyses of the Modernization of a Chamber Furnace Operating on Natural Gas or Hydrogen. *International Journal of Hydrogen Energy* **2022**, *47*, 13213–13225, doi:10.1016/j.ijhydene.2022.02.090.
1396. Huang, H.; Lv, Z.; Shang, J.; Yu, Y.; Chung, K.H. Performance of SPE Electrodes in Electrolytic Regeneration Process of Desulfurization of Iron Complex. *International Journal of Hydrogen Energy* **2021**, *46*, 13971–13975, doi:10.1016/j.ijhydene.2021.01.204.
1397. Izawa, C.; Wagner, S.; Deutges, M.; Martín, M.; Weber, S.; Pargeter, R.; Michler, T.; Uchida, H.-H.; Gemma, R.; Pundt, A. Relationship between Hydrogen Embrittlement and Md30 Temperature: Prediction of Low-Nickel Austenitic Stainless Steel's Resistance. *International Journal of Hydrogen Energy* **2019**, *44*, 25064–25075, doi:10.1016/j.ijhydene.2019.07.179.
1398. Jaramillo-Gutiérrez, M.I.; Sierra-González, S.M.; Ramírez-González, C.A.; Pedraza-Rosas, J.E.; Pedraza-Avella, J.A. Effect of Electrodeposition Parameters and Surface Pretreatment on the Electrochemical Hydrogen Production Using Nickel-Plated Stainless Steel Electrodes. *International Journal of Hydrogen Energy* **2021**, *46*, 7667–7675, doi:10.1016/j.ijhydene.2019.09.205.
1399. Li, F.; Chu, M.; Tang, J.; Liu, Z.; Zhou, Y.; Wang, J. Exergy Analysis of Hydrogen-Reduction Based Steel Production with Coal Gasification-Shaft Furnace-Electric Furnace Process. *International Journal of Hydrogen Energy* **2021**, *46*, 12771–12783, doi:10.1016/j.ijhydene.2021.01.083.
1400. Li, P.; Li, Y.; Yu, J.; Gao, P.; Han, Y. Kinetics and Microstructural Changes during Fluidized Reduction of Magnetite with Hydrogen at Low Temperatures. *International Journal of Hydrogen Energy* **2022**, *47*, 31140–31151, doi:10.1016/j.ijhydene.2022.07.032.
1401. Li, X.; Zhou, P.; Ogle, K.; Proch, S.; Paliwal, M.; Jansson, A.; Westlinder, J. Transient Stainless-Steel Dissolution and Its Consequences on Ex-Situ Bipolar Plate Testing Procedures. *International Journal of Hydrogen Energy* **2020**, *45*, 984–995, doi:10.1016/j.ijhydene.2019.10.191.
1402. Li, Y.; Bi, M.; Zhou, Y.; Jiang, H.; Huang, L.; Zhang, K.; Gao, W. Experimental and Theoretical Evaluation of Hydrogen Cloud Explosion with Built-in Obstacles. *International Journal of Hydrogen Energy* **2020**, *45*, 28007–28018, doi:10.1016/j.ijhydene.2020.07.067.
1403. Liu, W.; Zuo, H.; Wang, J.; Xue, Q.; Ren, B.; Yang, F. The Production and Application of Hydrogen in Steel Industry. *International Journal of Hydrogen Energy* **2021**, *46*, 10548–10569, doi:10.1016/j.ijhydene.2020.12.123.

1404. Lukashuk, L.; van de Water, L.G.A.; van Dijk, H.A.J.; Cobden, P.D.; Dodds, D.L.; Hyde, T.I.; Watson, M.J. A New Application of the Commercial High Temperature Water Gas Shift Catalyst for Reduction of CO<sub>2</sub> Emissions in the Iron and Steel Industry: Lab-Scale Catalyst Evaluation. *International Journal of Hydrogen Energy* **2021**, *46*, 39023–39035, doi:10.1016/j.ijhydene.2021.09.203.
1405. Ma, K.; Xu, J.; Deng, J.; Kou, M.; Wen, L. Hydrogen Impact on the Shrinkage Behaviors of Wustite Packed Beds above 900 °C. *International Journal of Hydrogen Energy* **2019**, *44*, 19555–19562, doi:10.1016/j.ijhydene.2019.05.181.
1406. Moqsud, M.; Khong, V. Bioelectricity Generation and Remediation of Contaminated Intertidal Zone of Yamaguchi Bay, Japan. *International Journal of Hydrogen Energy* **2021**, *46*, 1188–1196, doi:10.1016/j.ijhydene.2020.09.257.
1407. Ozbas, E.E.; Aksu, D.; Ongen, A.; Aydin, M.A.; Ozcan, H.K. Hydrogen Production via Biomass Gasification, and Modeling by Supervised Machine Learning Algorithms. *International Journal of Hydrogen Energy* **2019**, *44*, 17260–17268, doi:10.1016/j.ijhydene.2019.02.108.
1408. Proch, S.; Stenström, M.; Eriksson, L.; Andersson, J.; Sjöblom, G.; Jansson, A.; Westlinder, J. Coated Stainless Steel as Bipolar Plate Material for Anion Exchange Membrane Fuel Cells (AEMFCs). *International Journal of Hydrogen Energy* **2020**, *45*, 1313–1324, doi:10.1016/j.ijhydene.2019.04.122.
1409. Rangel-Hernandez, V.H.; Fang, Q.; Malzbender, J.; Sause, M.G.R.; Babelot, C.; Gross-Barsnick, S.M.; Blum, L. An Acoustic Emission Analysis of Glass-Ceramic Sealants for Solid Oxide Fuel and Electrolysis Cells Exposed to Torsional Tests: Room and High-Temperature Experiments. *International Journal of Hydrogen Energy* **2021**, *46*, 14724–14734, doi:10.1016/j.ijhydene.2021.01.232.
1410. Shaofu, M.; Bani Hani, E.H.; Tao, H.; Xu, Q. Exergy, Economic, and Optimization of a Clean Hydrogen Production System Using Waste Heat of a Steel Production Factory. *International Journal of Hydrogen Energy* **2022**, *47*, 26067–26081, doi:10.1016/j.ijhydene.2021.07.208.
1411. Tang, Z.; Xiao, H.; Sun, Y.; Gao, P.; Zhang, Y. Exploration of Hydrogen-Based Suspension Magnetization Roasting for Refractory Iron Ore towards a Carbon-Neutral Future: A Pilot-Scale Study. *International Journal of Hydrogen Energy* **2022**, *47*, 15074–15083, doi:10.1016/j.ijhydene.2022.02.219.
1412. Thaheem, I.; Joh, D.W.; Noh, T.; Lee, K.T. Highly Conductive and Stable Mn<sub>1.35</sub>Co<sub>1.35</sub>Cu<sub>0.2</sub>Y<sub>0.1</sub>O<sub>4</sub> Spinel Protective Coating on Commercial Ferritic Stainless Steels for Intermediate-Temperature Solid Oxide Fuel Cell Interconnect Applications. *International Journal of Hydrogen Energy* **2019**, *44*, 4293–4303, doi:10.1016/j.ijhydene.2018.12.173.
1413. Tohme, E.; Barnier, V.; Christien, F.; Bosch, C.; Wolski, K.; Zamanzade, M. SKPFM Study of Hydrogen in a Two Phase Material. Experiments and Modelling. *International Journal of Hydrogen Energy* **2019**, *44*, 18597–18605, doi:10.1016/j.ijhydene.2019.05.177.
1414. Villalobos, J.C.; Del-Pozo, A.; Mayen, J.; Serna, S.; Campillo, B. Hydrogen

- Embrittlement Suscetibility on X-120 Microalloyed Steel as Function of Tempering Temperature. *International Journal of Hydrogen Energy* **2020**, *45*, 9137–9148, doi:10.1016/j.ijhydene.2020.01.094.
1415. Zhang, P.; Xu, Z.; Zhang, B.; Lei, B.; Feng, Z.; Meng, G.; Wang, Y.; Wang, J.; Wang, F. Enhanced Inhibition on Hydrogen Permeation during Electrodeposition Process by Rare Earth (RE = Ce) Salt Additive. *International Journal of Hydrogen Energy* **2022**, *47*, 13803–13814, doi:10.1016/j.ijhydene.2022.02.145.
  1416. Zhao, G.; Kraglund, M.R.; Frandsen, H.L.; Wulff, A.C.; Jensen, S.H.; Chen, M.; Graves, C.R. Life Cycle Assessment of H<sub>2</sub>O Electrolysis Technologies. *International Journal of Hydrogen Energy* **2020**, *45*, 23765–23781, doi:10.1016/j.ijhydene.2020.05.282.
  1417. Zhong, X.; He, Y.; Eliaz, N.; Campbell, K.S.; Hu, J. Hydrogen Effect on Phase Angle Shift in Electrochemical Impedance Spectroscopy during Corrosion Fatigue Crack Emanation. *International Journal of Hydrogen Energy* **2021**, *46*, 40175–40184, doi:10.1016/j.ijhydene.2021.09.205.
  1418. Arzoumanidis, I.; Petti, L.; Raucci, D.; Raggi, A. Multifunctional Modelling in the Life Cycle Assessment of Honey Considering Pollination. *International Journal of Life Cycle Assessment* **2021**, *26*, 643–655, doi:10.1007/s11367-020-01863-0.
  1419. Balasbaneh, A.T.; Sher, W.; Yeoh, D. Recommending a New Building Structure to Alleviate Environmental Impact in Tropical Climates: Increasing the Use of Wood in Construction. *International Journal of Life Cycle Assessment* **2022**, *27*, 885–901, doi:10.1007/s11367-022-02074-5.
  1420. Bertolini, M.; Guardigli, L. Upcycling Shipping Containers as Building Components: An Environmental Impact Assessment. *International Journal of Life Cycle Assessment* **2020**, *25*, 947–963, doi:10.1007/s11367-020-01747-3.
  1421. Bidoglio, G.; Berger, M.; Finkbeiner, M. An Environmental Assessment of Small Hydropower in India: The Real Costs of Dams' Construction under a Life Cycle Perspective. *International Journal of Life Cycle Assessment* **2019**, *24*, 419–440, doi:10.1007/s11367-018-1458-4.
  1422. Bushi, L.; Skrzek, T.; Reaburn, T. New Ultralight Automotive Door Life Cycle Assessment. *International Journal of Life Cycle Assessment* **2019**, *24*, 310–323, doi:10.1007/s11367-018-1515-z.
  1423. Chitaka, T.Y.; Russo, V.; von Blottnitz, H. In Pursuit of Environmentally Friendly Straws: A Comparative Life Cycle Assessment of Five Straw Material Options in South Africa. *International Journal of Life Cycle Assessment* **2020**, *25*, 1818–1832, doi:10.1007/s11367-020-01786-w.
  1424. Colangelo, F.; Navarro, T.G.; Farina, I.; Petrillo, A. Comparative LCA of Concrete with Recycled Aggregates: A Circular Economy Mindset in Europe. *International Journal of Life Cycle Assessment* **2020**, *25*, 1790–1804, doi:10.1007/s11367-020-01798-6.
  1425. de Bortoli, A.; Bouhaya, L.; Feraille, A. A Life Cycle Model for High-Speed Rail Infrastructure: Environmental Inventories and Assessment of the Tours-Bordeaux

- Railway in France. *International Journal of Life Cycle Assessment* **2020**, *25*, 814–830, doi:10.1007/s11367-019-01727-2.
1426. Djadouni, H.; Trouzine, H.; Gomes Correia, A.; Miranda, T.F.S. Life Cycle Assessment of Retaining Wall Backfilled with Shredded Tires. *International Journal of Life Cycle Assessment* **2019**, *24*, 581–589, doi:10.1007/s11367-018-1475-3.
1427. Donatello, S.; Cordella, M.; Kaps, R.; Kowalska, M.; Wolf, O. Are the Existing EU Ecolabel Criteria for Furniture Products Too Complex? An Analysis of Complexity from a Material and a Supply Chain Perspective and Suggestions for Ways Ahead. *International Journal of Life Cycle Assessment* **2020**, *25*, 868–882, doi:10.1007/s11367-019-01601-1.
1428. Favi, C.; Campi, F.; Germani, M. Comparative Life Cycle Assessment of Metal Arc Welding Technologies by Using Engineering Design Documentation. *International Journal of Life Cycle Assessment* **2019**, *24*, 2140–2172, doi:10.1007/s11367-019-01621-x.
1429. Guarino, F.; Cellura, M.; Traverso, M. Costructural Law, Exergy Analysis and Life Cycle Energy Sustainability Assessment: An Expanded Framework Applied to a Boiler. *International Journal of Life Cycle Assessment* **2020**, *25*, 2063–2085, doi:10.1007/s11367-020-01779-9.
1430. Ji, C.; Ma, X.; Zhai, Y.; Zhang, R.; Shen, X.; Zhang, T.; Hong, J. Environmental Impact Assessment of Galvanized Sheet Production: A Case Study in Shandong Province, China. *International Journal of Life Cycle Assessment* **2020**, *25*, 760–770, doi:10.1007/s11367-020-01735-7.
1431. Jordan, N.D. How Coordinated Sectoral Responses to Environmental Policy Increase the Availability of Product Life Cycle Data. *International Journal of Life Cycle Assessment* **2021**, *26*, 692–706, doi:10.1007/s11367-021-01873-6.
1432. Ma, X.; Yang, D.; Zhai, Y.; Shen, X.; Zhang, R.; Hong, J. Cost-Combined Life Cycle Assessment of Ferronickel Production. *International Journal of Life Cycle Assessment* **2019**, *24*, 1840–1850, doi:10.1007/s11367-019-01600-2.
1433. Mair-Bauernfeind, C.; Zimek, M.; Asada, R.; Bauernfeind, D.; Baumgartner, R.J.; Stern, T. Prospective Sustainability Assessment: The Case of Wood in Automotive Applications. *International Journal of Life Cycle Assessment* **2020**, *25*, 2027–2049, doi:10.1007/s11367-020-01803-y.
1434. Mair-Bauernfeind, C.; Zimek, M.; Lettner, M.; Hesser, F.; Baumgartner, R.J.; Stern, T. Comparing the Incomparable? A Review of Methodical Aspects in the Sustainability Assessment of Wood in Vehicles. *International Journal of Life Cycle Assessment* **2020**, *25*, 2217–2240, doi:10.1007/s11367-020-01800-1.
1435. Muhl, M.; Berger, M.; Finkbeiner, M. Distance-to-Target Weighting in LCA—A Matter of Perspective. *International Journal of Life Cycle Assessment* **2021**, *26*, 114–126, doi:10.1007/s11367-020-01837-2.
1436. Paratscha, R.; von der Thannen, M.; Smutny, R.; Lampalzer, T.; Strauss, A.; Rauch, H.P. Screening LCA of Torrent Control Structures in Austria. *International Journal of Life Cycle Assessment* **2019**, *24*, 129–141, doi:10.1007/s11367-018-1501-5.

1437. Sangwan, K.S.; Choudhary, K. Benchmarking Environmental Performance of Electric Insulator Supply Chain in India Using Life Cycle Assessment. *International Journal of Life Cycle Assessment* **2019**, *24*, 518–529, doi:10.1007/s11367-018-1455-7.
1438. Shahvarooghi Farahani, S.; Soheilifard, F.; Ghasemi Nejad Raini, M.; Kokei, D. Comparison of Different Tomato Puree Production Phases from an Environmental Point of View. *International Journal of Life Cycle Assessment* **2019**, *24*, 1817–1827, doi:10.1007/s11367-019-01613-x.
1439. Silva, F.B.; Reis, D.C.; Mack-Vergara, Y.L.; Pessoto, L.; Feng, H.; Pacca, S.A.; Lasvaux, S.; Habert, G.; John, V.M. Primary Data Priorities for the Life Cycle Inventory of Construction Products: Focus on Foreground Processes. *International Journal of Life Cycle Assessment* **2020**, *25*, 980–997, doi:10.1007/s11367-020-01762-4.
1440. Thomson, R.C.; Chick, J.P.; Harrison, G.P. An LCA of the Pelamis Wave Energy Converter. *International Journal of Life Cycle Assessment* **2019**, *24*, 51–63, doi:10.1007/s11367-018-1504-2.
1441. Yuguda, T.K.; Li, Y.; Xiong, W.; Zhang, W. Life Cycle Assessment of Options for Retrofitting an Existing Dam to Generate Hydro-Electricity. *International Journal of Life Cycle Assessment* **2020**, *25*, 57–72, doi:10.1007/s11367-019-01671-1.
1442. Zeug, W.; Bezama, A.; Thrän, D. Application of Holistic and Integrated LCSA: Case Study on Laminated Veneer Lumber Production in Central Germany. *International Journal of Life Cycle Assessment* **2022**, doi:10.1007/s11367-022-02098-x.
1443. Zhai, Y.; Zhang, T.; Tan, X.; Wang, G.; Duan, L.; Shi, Q.; Ji, C.; Bai, Y.; Shen, X.; Meng, J.; et al. Environmental Impact Assessment of Ground Source Heat Pump System for Heating and Cooling: A Case Study in China. *International Journal of Life Cycle Assessment* **2022**, *27*, 395–408, doi:10.1007/s11367-022-02034-z.
1444. Zhang, J.; Yuan, H.; Deng, Y.; Abu-Reesh, I.M.; He, Z.; Yuan, C. Life Cycle Assessment of Osmotic Microbial Fuel Cells for Simultaneous Wastewater Treatment and Resource Recovery. *International Journal of Life Cycle Assessment* **2019**, *24*, 1962–1975, doi:10.1007/s11367-019-01626-6.
1445. Cuce, P.M.; Kolayli, S.; Cuce, E. Enhanced Performance Figures of Solar Cookers through Latent Heat Storage and Low-Cost Booster Reflectors. *International Journal of Low-Carbon Technologies* **2020**, *15*, 427–433, doi:10.1093/IJLCT/CTZ079.
1446. Feng, X.; Xue, F.; Carvelli, V.; Zhao, T.; He, F.; Wang, D. A Novel Rock Bolting System Exploiting Steel Particles. *International Journal of Mining Science and Technology* **2022**, doi:10.1016/j.ijmst.2022.08.003.
1447. Liao, L.; Tan, Q. Study of the Tensile Damage of 321 Stainless Steel for Solar Thermal Power Generation by Acoustic Emission. *International Journal of Photoenergy* **2020**, *2020*, doi:10.1155/2020/8450737.
1448. Wang, W.; Yu, Q.; Liu, X.; Hao, L.; Mi, J.; Li, S.; Li, S.; Lu, Z.; Li, S.; Liu, H. Study on the Influence of Introducing Al Transition Layer on Deuterium Resistance of Al<sub>2</sub>O<sub>3</sub>Coating. *International Journal of Photoenergy* **2021**, *2021*, doi:10.1155/2021/6687288.
1449. Dér, A.; Kaluza, A.; Reimer, L.; Herrmann, C.; Thiede, S. Integration of Energy

- Oriented Manufacturing Simulation into the Life Cycle Evaluation of Lightweight Body Parts. *International Journal of Precision Engineering and Manufacturing - Green Technology* **2022**, *9*, 899–918, doi:10.1007/s40684-021-00412-w.
1450. Jiao, Y.; Lee, G.; Wang, L.; Park, J.-H.; Choi, N.-S. Metal Fatigue-Limit Estimation Based on Intrinsic Dissipated Energy. *International Journal of Precision Engineering and Manufacturing - Green Technology* **2022**, doi:10.1007/s40684-022-00458-4.
1451. Kaymak, M.K.; Şahin, A.D. The First Design and Application of Floating Photovoltaic (FPV) Energy Generation Systems in Turkey with Structural and Electrical Performance. *International Journal of Precision Engineering and Manufacturing - Green Technology* **2022**, *9*, 827–839, doi:10.1007/s40684-021-00369-w.
1452. Lu, Y.; Sun, J.; Wu, X.; Chen, F. On-Line Prediction of Impulse Spark and Arc Discharge Removals of Metal Bond in Dry Electrical Discharge Dressing of Diamond Grinding Wheel. *International Journal of Precision Engineering and Manufacturing - Green Technology* **2022**, doi:10.1007/s40684-022-00445-9.
1453. Falconer, S.; Krause, P.; Bäck, T.; Nordgård-Hansen, E.; Grasmø, G. Condition Classification of Fibre Ropes during Cyclic Bend over Sheave Testing Using Machine Learning. *International Journal of Prognostics and Health Management* **2022**, *13*, doi:10.36001/IJPHM.2022.v13i1.3105.
1454. Hwangdee, P.; Jansiri, C.; Sudajan, S.; Laloon, K. Physical Characteristics and Energy Content of Biomass Charcoal Powder. *International Journal of Renewable Energy Research* **2021**, *11*, 158–169.
1455. Vendittozzi, C.; Ciro, E.; Felli, F.; Lupi, C.; Marra, F.; Pulci, G.; Astri, A. Static and Dynamic Weighing of Rolling Stocks by Mean of a Customized FBG-Sensorized-Patch. *International Journal of Safety and Security Engineering* **2020**, *10*, 83–88, doi:10.18280/ijssse.100111.
1456. Karolina, R.; Handana, M.; Jatmikanto, R. Effect of Various Curing on High Strength Concrete Using Slag Cement. *International Journal of Sustainable Construction Engineering and Technology* **2020**, *11*, 72–78, doi:10.30880/ijscet.2020.11.02.008.
1457. Nugroho, G. Natural Frequency of Tension Cable Based on Moment Inertia to Span Ratio: Determination Using Analytical, Numerical and Experimental Study. *International Journal of Sustainable Construction Engineering and Technology* **2020**, *11*, 89–100, doi:10.30880/ijscet.2020.11.02.010.
1458. Vijayasree, V.P.; Johari, W.L.W. The Influence of Industrial Steel Waste on Slump Test and Compressive Strength in Eco-Friendly Concrete Fabrication. *International Journal of Sustainable Construction Engineering and Technology* **2022**, *13*, 81–86, doi:10.30880/ijscet.2022.13.01.008.
1459. Feroni, R.D.C.; Galvão, E.S. Sustainable Development Indicators Assessment for the City of Anchieta-ES Brazil at Different Times of the Local Economy. *International Journal of Sustainable Development and World Ecology* **2020**, *27*, 524–533, doi:10.1080/13504509.2020.1738585.



1460. Suman, S.; Yadav, A.M.; Bhushan, A.; Bhaskara Rao, L.; Rajak, D.K. Substitution of Coking Coal with Biochar for Thermal and Metallurgical Utilisation. *International Journal of Sustainable Energy* **2022**, doi:10.1080/14786451.2022.2110100.
1461. Choi, B.; Yoo, S.; Lee, K.-D.; Park, S.-I. An Environmental Impact Comparison of Disposable Wood Pallets and Reusable Steel Cradles: A Case Study on Rolled Steel Coils in Container Shipping in South Korea. *International Journal of Sustainable Transportation* **2020**, *14*, 335–342, doi:10.1080/15568318.2018.1558468.
1462. Dutz, F.J.; Boje, S.; Orth, U.; Koch, A.W.; Roths, J. High-Temperature Profile Monitoring in Gas Turbine Exhaust-Gas Diffusers with Six-Point Fiber-Optic Sensor Array. *International Journal of Turbomachinery, Propulsion and Power* **2020**, *5*, doi:10.3390/IJTTP5040025.
1463. Sulaiman, A.; Hunaiti, Y.; Abdel-Jaberorcid; Abdel-Jaber, M. Compressive Behavior of Light-Gauge Steel Tubes Filled with Concrete Containing Recycled Aggregates. *International Review of Applied Sciences and Engineering* **2022**, *13*, 185–196, doi:10.1556/1848.2021.00333.
1464. Samet, H.; Mojallal, A.; Ghanbari, T.; Farhadi, M.R. Enhancement of SVC Performance in Electric Arc Furnace for Flicker Suppression Using a Gray-ANN Based Prediction Method. *International Transactions on Electrical Energy Systems* **2019**, *29*, doi:10.1002/etep.2811.
1465. Chirgwin, G.A.; Sutton, B. A Low-Cost, High-Precision Drip Emitter Suitable for Low-Pressure Micro-Irrigation Systems. *Irrigation Science* **2019**, *37*, 725–735, doi:10.1007/s00271-019-00641-7.
1466. Corsini, A.; Baiguera, G.; Capuano, F.; Ciccicarese, G.; Diena, M.; Mulas, M.; Ronchetti, F.; Rossi, G.; Truffelli, G. MICROPILES TRIPODS SHIELDS (MTS) AS UNCONVENTIONAL BREAKERS FOR THE CONTROL OF MODERATELY RAPID EARTHFLAWS (SASSI NERI LANDSLIDE, NORTHERN APENNINES). *Italian Journal of Engineering Geology and Environment* **2021**, 35–45, doi:10.4408/IJEGE.2021-01.S-03.
1467. Fan, Z.; Friedmann, S.J. Low-Carbon Production of Iron and Steel: Technology Options, Economic Assessment, and Policy. *Joule* **2021**, *5*, 829–862, doi:10.1016/j.joule.2021.02.018.
1468. Fennell, P.S.; Davis, S.J.; Mohammed, A. Decarbonizing Cement Production. *Joule* **2021**, *5*, 1305–1311, doi:10.1016/j.joule.2021.04.011.
1469. Schmidt, F.; Zimmermann, Y.-S.; dos Reis Benatto, G.A.; Kolvenbach, B.A.; Schäffer, A.; Krebs, F.C.; van Hullebusch, E.D.; Lenz, M. Biodeterioration Affecting Efficiency and Lifetime of Plastic-Based Photovoltaics. *Joule* **2020**, *4*, 2088–2100, doi:10.1016/j.joule.2020.08.015.
1470. Sutherland, B.R. Accelerating Green Steel in the EU. *Joule* **2020**, *4*, 1860–1861, doi:10.1016/j.joule.2020.08.018.
1471. Sutherland, B.R. Sustainably Heating Heavy Industry. *Joule* **2020**, *4*, 14–16, doi:10.1016/j.joule.2019.12.020.
1472. Vogl, V.; Olsson, O.; Nykvist, B. Phasing out the Blast Furnace to Meet Global

- Climate Targets. *Joule* **2021**, *5*, 2646–2662, doi:10.1016/j.joule.2021.09.007.
1473. Omidvarborna, H.; Baawain, M.; Al-Mamun, A.; Siddiqi, S. Characterizing the Unknown Contribution of Iron Industries in Atmospheric Iron Emissions Using Sensitivity Analysis. *Journal of Aerosol Science* **2021**, *151*, doi:10.1016/j.jaerosci.2020.105630.
  1474. Deng, Q.-J.; Cao, C.-G.; Li, C.-F. Effects of Different Ratooning Cultivation Modes on Greenhouse Gas Emissions and Grain Yields in Paddy Fields. *Journal of Agro-Environment Science* **2019**, *38*, 1373–1380, doi:10.11654/jaes.2018-1400.
  1475. Naghan, D.J.; Mahmoodi, A.; Tavasolifar, A.; Saeidi, M.S.; Jalilpoor, Y. Analyzing the Health Risk Assessment of Particles in Isfahan Steel Company by AERMOD Model. *Journal of Air Pollution and Health* **2021**, *6*, 91–100, doi:10.18502/japh.v6i2.7952.
  1476. Sharma, S.; Joshi, P.; Mehtab, S.; Zaidi, M.G.H.; Singhal, K.; Siddiqi, T.I. Development of Non-Enzymatic Cholesterol Electrochemical Sensor Based on Polyindole/Tungsten Carbide Nanocomposite. *Journal of Analysis and Testing* **2020**, *4*, 13–22, doi:10.1007/s41664-020-00117-0.
  1477. Feng, Y.-H.; Zhang, Z.; Gao, J.; Feng, G.-P.; Qiu, L.; Feng, D.-L.; Zhang, X.-X.; Zhu, X. Research Status of Centrifugal Granulation, Physical Heat Recovery and Resource Utilization of Blast Furnace Slags. *Journal of Analytical and Applied Pyrolysis* **2021**, *157*, doi:10.1016/j.jaap.2021.105220.
  1478. Watwe, V.; Kulkarni, P. Evaluation of Cr(VI) Adsorption on Glutaraldehyde Crosslinked Chitosan Beads Using Cyclic Voltammetry Employing Gold Electrode. *Journal of Analytical Science and Technology* **2021**, *12*, doi:10.1186/s40543-021-00291-5.
  1479. Bakke, M.; Sakurai, K.; Tanaka, N.; Saito, W.; Nishimoto, K. Validation Study of LuciPac™ A3 Surface for Hygiene Monitoring through Detection of ATP, ADP, and AMP from Stainless Steel Surfaces: AOAC Performance Tested MethodSM 051901. *Journal of AOAC International* **2021**, *103*, 1090–1104, doi:10.1093/JAOACINT/QSZ033.
  1480. Bleichner, L.; Bleicher, V.; Göhring, N.; Kleiboeker, S.B. Validation of the VIRSeek SARS-CoV-2 Mplex Assay for Detection of SARS-CoV-2 on Stainless-Steel Surfaces: AOAC Performance Tested MethodSM 122006. *Journal of AOAC International* **2021**, *104*, 872–888, doi:10.1093/jaoacint/qsab045.
  1481. Fantin, N.; Taft, B.; Ugalde, J.; Spring, K.; Lam, H.; Tran, A.; Green, J. Validation of the COVID-19 Indoor Test™ by Phylagen for Detection of SARS-CoV-2 Virus on Stainless-Steel Surfaces: AOAC Performance Tested MethodSM 122004. *Journal of AOAC International* **2021**, *104*, 948–958, doi:10.1093/jaoacint/qsab051.
  1482. Lonczynski, T.; Cowin, L. The Validation of the MEMP Salmonella Assay: AOAC Performance Tested MethodSM 042002. *Journal of AOAC International* **2021**, *104*, 1109–1118, doi:10.1093/jaoacint/qsab033.
  1483. Lonczynski, T.; Cowin, L. Validation of the Applied Food Diagnostics, Inc. Molecular Environmental Monitoring Program (MEMP) Listeria Assay for

- Detection of *Listeria* Spp. in Environmental Surface Samples: AOAC Performance Tested MethodSM 052003. *Journal of AOAC International* **2021**, *104*, 1355–1365, doi:10.1093/jaoacint/qsab034.
1484. Rosauer, M.L.; Silbernagel, K.M.; Thompson, W. Validation of the 3M™ Environmental Scrub Sampler with Wide-Spectrum Neutralizer: AOAC Performance Tested MethodSM 022104. *Journal of AOAC International* **2022**, *105*, 876–888, doi:10.1093/jaoacint/qsab136.
1485. Jaiswal, R.K.; Lohani, A.K.; Galkate, R.V. Decision Support for Scenario Analysis in a Complex Water Resource Project. *Journal of Applied Water Engineering and Research* **2021**, *9*, 52–68, doi:10.1080/23249676.2020.1844604.
1486. Huang, F.; Zhou, J.; Chen, N.; Li, Y.; Li, K.; Wu, S. Chemical Characteristics and Source Apportionment of PM<sub>2.5</sub> in Wuhan, China. *Journal of Atmospheric Chemistry* **2019**, *76*, 245–262, doi:10.1007/s10874-019-09395-0.
1487. Zhou, Z.; Tan, Q.; Deng, Y.; Wu, K.; Yang, X.; Zhou, X. Emission Inventory of Anthropogenic Air Pollutant Sources and Characteristics of VOCs Species in Sichuan Province, China. *Journal of Atmospheric Chemistry* **2019**, *76*, 21–58, doi:10.1007/s10874-019-9386-7.
1488. Huang, X.; Quan, X.; Zhu, S.; Cheng, W.; Cheng, C.; Qiu, F.; Cheng, Z. Catalytic Ozonation Treatment of Biochemically Treated Leachate from Municipal Waste Solid Using Ti–Mn Oxide-Coated Stainless Steel Mesh Catalyst. *Journal of Chemical Technology and Biotechnology* **2020**, *95*, 2371–2382, doi:10.1002/jctb.6419.
1489. Matsukevich, I.; Kulinich, N.; Romanovski, V. Direct Reduced Iron and Zinc Recovery from Electric Arc Furnace Dust. *Journal of Chemical Technology and Biotechnology* **2022**, doi:10.1002/jctb.7205.
1490. Zhang, X.; Jiang, W. Development and Temperature Gradient Online Monitoring of a Vehicular Rotary Solid-State Bioreactor: A Novel Device for Large-Scale Preparation of *Aspergillus Niger* Spore Inoculum. *Journal of Chemical Technology and Biotechnology* **2019**, *94*, 3883–3894, doi:10.1002/jctb.6186.
1491. Abbas-Abadi, M.S.; Kusenberg, M.; Shirazi, H.M.; Goshayeshi, B.; Van Geem, K.M. Towards Full Recyclability of End-of-Life Tires: Challenges and Opportunities. *Journal of Cleaner Production* **2022**, *374*, doi:10.1016/j.jclepro.2022.134036.
1492. Abdel-Gawwad, H.A.; Mohamed, S.A.; Mohammed, M.S. Recycling of Slag and Lead-Bearing Sludge in the Cleaner Production of Alkali Activated Cement with High Performance and Microbial Resistivity. *Journal of Cleaner Production* **2019**, *220*, 568–580, doi:10.1016/j.jclepro.2019.02.144.
1493. Abdulkareem, M.; Havukainen, J.; Horttanainen, M. How Environmentally Sustainable Are Fibre Reinforced Alkali-Activated Concretes? *Journal of Cleaner Production* **2019**, *236*, doi:10.1016/j.jclepro.2019.07.076.
1494. AbouHamad, M.; Abu-Hamd, M. Framework for Construction System Selection Based on Life Cycle Cost and Sustainability Assessment. *Journal of Cleaner Production* **2019**, *241*, doi:10.1016/j.jclepro.2019.118397.

1495. Adesanya, E.; Ohenoja, K.; Di Maria, A.; Kinnunen, P.; Illikainen, M. Alternative Alkali-Activator from Steel-Making Waste for One-Part Alkali-Activated Slag. *Journal of Cleaner Production* **2020**, *274*, doi:10.1016/j.jclepro.2020.123020.
1496. Afzal, M.; Liu, Y.; Cheng, J.; Gan, V. Reinforced Concrete Structural Design Optimization: A Critical Review. *Journal of Cleaner Production* **2020**, *260*, doi:10.1016/j.jclepro.2020.120623.
1497. Agudelo, G.; Cifuentes, S.; Colorado, H. Ground Tire Rubber and Bitumen with Wax and Its Application in a Real Highway. *Journal of Cleaner Production* **2019**, *228*, 1048–1061, doi:10.1016/j.jclepro.2019.04.353.
1498. Ahmed, W.; Lim, C.W. Production of Sustainable and Structural Fiber Reinforced Recycled Aggregate Concrete with Improved Fracture Properties: A Review. *Journal of Cleaner Production* **2021**, *279*, doi:10.1016/j.jclepro.2020.123832.
1499. Akbar, A.; Liew, K. Assessing Recycling Potential of Carbon Fiber Reinforced Plastic Waste in Production of Eco-Efficient Cement-Based Materials. *Journal of Cleaner Production* **2020**, *274*, doi:10.1016/j.jclepro.2020.123001.
1500. Al-Khafaji, A.F.; Myers, J.J.; Alghazali, H.H. Evaluation of Bond Performance of Glass Fiber Rebars Embedded in Sustainable Concrete. *Journal of Cleaner Production* **2021**, *282*, doi:10.1016/j.jclepro.2020.124516.
1501. Albuquerque, T.L.M.; Mattos, C.A.; Scur, G.; Kissimoto, K. Life Cycle Costing and Externalities to Analyze Circular Economy Strategy: Comparison between Aluminum Packaging and Tinplate. *Journal of Cleaner Production* **2019**, *234*, 477–486, doi:10.1016/j.jclepro.2019.06.091.
1502. Ali, A.K.; Wang, Y.; Alvarado, J.L. Facilitating Industrial Symbiosis to Achieve Circular Economy Using Value-Added by Design: A Case Study in Transforming the Automobile Industry Sheet Metal Waste-Flow into Voronoi Facade Systems. *Journal of Cleaner Production* **2019**, *234*, 1033–1044, doi:10.1016/j.jclepro.2019.06.202.
1503. Alibakhshi, E.; Ghasemi, E.; Mahdavian, M.; Ramezanzadeh, B.; Mana yasaei The Effect of Interlayer Spacing on the Inhibitor Release Capability of Layered Double Hydroxide Based Nanocontainers. *Journal of Cleaner Production* **2020**, *251*, doi:10.1016/j.jclepro.2019.119676.
1504. Alibakhshi, E.; Ramezanzadeh, M.; Haddadi, S.A.; Bahlakeh, G.; Ramezanzadeh, B.; Mahdavian, M. Persian Liquorice Extract as a Highly Efficient Sustainable Corrosion Inhibitor for Mild Steel in Sodium Chloride Solution. *Journal of Cleaner Production* **2019**, *210*, 660–672, doi:10.1016/j.jclepro.2018.11.053.
1505. Amani, A.; Ramezani pour, A.; Palassi, M. Investigation on the Sustainable Use of Electric Arc Furnace Slag Aggregates in Eco-Friendly Alkali-Activated Low Fineness Slag Concrete as a Green Construction Composite. *Journal of Cleaner Production* **2021**, *307*, doi:10.1016/j.jclepro.2021.127257.
1506. Anastasiades, K.; Goffin, J.; Rinke, M.; Buyle, M.; Audenaert, A.; Blom, J. Standardisation: An Essential Enabler for the Circular Reuse of Construction Components? A Trajectory for a Cleaner European Construction Industry. *Journal of Cleaner Production* **2021**, *298*, doi:10.1016/j.jclepro.2021.126864.

1507. Andersson, J.; Grönkvist, S. Improving the Economics of Fossil-Free Steelmaking via Co-Production of Methanol. *Journal of Cleaner Production* **2022**, *350*, doi:10.1016/j.jclepro.2022.131469.
1508. Arendt, R.; Bach, V.; Finkbeiner, M. The Global Environmental Costs of Mining and Processing Abiotic Raw Materials and Their Geographic Distribution. *Journal of Cleaner Production* **2022**, *361*, doi:10.1016/j.jclepro.2022.132232.
1509. Arguillarena, A.; Margallo, M.; Urtiaga, A.; Irabien, A. Life-Cycle Assessment as a Tool to Evaluate the Environmental Impact of Hot-Dip Galvanisation. *Journal of Cleaner Production* **2021**, *290*, doi:10.1016/j.jclepro.2020.125676.
1510. Arora, M.; Raspall, F.; Cheah, L.; Silva, A. Residential Building Material Stocks and Component-Level Circularity: The Case of Singapore. *Journal of Cleaner Production* **2019**, *216*, 239–248, doi:10.1016/j.jclepro.2019.01.199.
1511. Aslani, F.; Wang, L. Fabrication and Characterization of an Engineered Cementitious Composite with Enhanced Fire Resistance Performance. *Journal of Cleaner Production* **2019**, *221*, 202–214, doi:10.1016/j.jclepro.2019.02.241.
1512. Awale, A.S.; Chaudhari, A.; Kumar, A.; Khan Yusufzai, M.Z.; Vashista, M. Synergistic Impact of Eco-Friendly Nano-Lubricants on the Grindability of AISI H13 Tool Steel: A Study towards Clean Manufacturing. *Journal of Cleaner Production* **2022**, *364*, doi:10.1016/j.jclepro.2022.132686.
1513. Bagatini, M.C.; Fernandes, T.; Silva, R.; Galvão, D.F.; Flores, I.V. Mill Scale and Flue Dust Briquettes as Alternative Burden to Low Height Blast Furnaces. *Journal of Cleaner Production* **2020**, *276*, doi:10.1016/j.jclepro.2020.124332.
1514. Bai, T.; Song, Z.; Wang, H.; Wu, Y.; Huang, W. Performance Evaluation of Metakaolin Geopolymer Modified by Different Solid Wastes. *Journal of Cleaner Production* **2019**, *226*, 114–121, doi:10.1016/j.jclepro.2019.04.093.
1515. Bailera, M.; Nakagaki, T.; Kataoka, R. Limits on the Integration of Power to Gas with Blast Furnace Ironmaking. *Journal of Cleaner Production* **2022**, *374*, doi:10.1016/j.jclepro.2022.134038.
1516. Balasbaneh, A.T.; Bin Marsono, A.K.; Gohari, A. Sustainable Materials Selection Based on Flood Damage Assessment for a Building Using LCA and LCC. *Journal of Cleaner Production* **2019**, *222*, 844–855, doi:10.1016/j.jclepro.2019.03.005.
1517. Bali, N.; Panta, M.P.; Antelo, M. Sustainable Performance-Oriented Production Practices in the Indian Iron and Steel Industry: An Empirical Investigation. *Journal of Cleaner Production* **2019**, *226*, 379–391, doi:10.1016/j.jclepro.2019.03.252.
1518. Bamigboye, G.; Bassey, D.; Olukanni, D.; Ngene, B.; Adegoke, D.; Odetoyan, A.; Kareem, M.; Enabulele, D.; Nworgu, A. Waste Materials in Highway Applications: An Overview on Generation and Utilization Implications on Sustainability. *Journal of Cleaner Production* **2021**, *283*, doi:10.1016/j.jclepro.2020.124581.
1519. Basha, S.I.; Kumar, A.M.; Maslehuddin, M.; Ahmad, S.; Rahman, M.M.; Shameem, M.; Hakeem, A.S.; Aziz, M.A. Preparation of Submicron-/Nano-Carbon from Heavy Fuel Oil Ash and Its Corrosion Resistance Performance as Composite Epoxy Coating. *Journal of Cleaner Production* **2021**, *319*,

- doi:10.1016/j.jclepro.2021.128735.
1520. Bendikiene, R.; Ciuplys, A.; Kavaliauskiene, L. Circular Economy Practice: From Industrial Metal Waste to Production of High Wear Resistant Coatings. *Journal of Cleaner Production* **2019**, *229*, 1225–1232, doi:10.1016/j.jclepro.2019.05.068.
1521. Beylot, A.; Guyonnet, D.; Muller, S.; Vaxelaire, S.; Villeneuve, J. Mineral Raw Material Requirements and Associated Climate-Change Impacts of the French Energy Transition by 2050. *Journal of Cleaner Production* **2019**, *208*, 1198–1205, doi:10.1016/j.jclepro.2018.10.154.
1522. Bhaskar, A.; Abhishek, R.; Assadi, M.; Somehesaraei, H.N. Decarbonizing Primary Steel Production: Techno-Economic Assessment of a Hydrogen Based Green Steel Production Plant in Norway. *Journal of Cleaner Production* **2022**, *350*, doi:10.1016/j.jclepro.2022.131339.
1523. Bo, X.; Li, Z.; Qu, J.; Cai, B.; Zhou, B.; Sun, L.; Cui, W.; Zhao, X.; Tian, J.; Kan, H. The Spatial-Temporal Pattern of Sintered Flue Gas Emissions in Iron and Steel Enterprises of China. *Journal of Cleaner Production* **2020**, *266*, doi:10.1016/j.jclepro.2020.121667.
1524. Böckin, D.; Tillman, A.-M. Environmental Assessment of Additive Manufacturing in the Automotive Industry. *Journal of Cleaner Production* **2019**, *226*, 977–987, doi:10.1016/j.jclepro.2019.04.086.
1525. Bolokang, A.S. Designing a Sn-Slag Composite with Possible Non-Toxic Applications to Provide a Pure Metal Casting Environment. *Journal of Cleaner Production* **2019**, *211*, 1313–1321, doi:10.1016/j.jclepro.2018.11.250.
1526. Buchert, T.; Ko, N.; Graf, R.; Vollmer, T.; Alkhayat, M.; Brandenburg, E.; Stark, R.; Klocke, F.; Leistner, P.; Schleifenbaum, J.H. Increasing Resource Efficiency with an Engineering Decision Support System for Comparison of Product Design Variants. *Journal of Cleaner Production* **2019**, *210*, 1051–1062, doi:10.1016/j.jclepro.2018.11.104.
1527. Buyle, M.; Maes, B.; Van Passel, S.; Boonen, K.; Vercalsteren, A.; Audenaert, A. Ex-Ante LCA of Emerging Carbon Steel Slag Treatment Technologies: Fast Forwarding Lab Observations to Industrial-Scale Production. *Journal of Cleaner Production* **2021**, *313*, doi:10.1016/j.jclepro.2021.127921.
1528. Cabrera-Luna, K.; Maldonado-Bandala, E.E.; Nieves-Mendoza, D.; Castro-Borges, P.; García, J.I.E. Novel Low Emissions Supersulfated Cements of Pumice in Concrete; Mechanical and Electrochemical Characterization. *Journal of Cleaner Production* **2020**, *272*, doi:10.1016/j.jclepro.2020.122520.
1529. Cacace, S.; Furlan, V.; Sorci, R.; Semeraro, Q.; Boccadoro, M. Using Recycled Material to Produce Gas-Atomized Metal Powders for Additive Manufacturing Processes. *Journal of Cleaner Production* **2020**, *268*, doi:10.1016/j.jclepro.2020.122218.
1530. Cai, J.; Li, X.; Tan, J.; Vandevyvere, B. Fly Ash-Based Geopolymer with Self-Heating Capacity for Accelerated Curing. *Journal of Cleaner Production* **2020**, *261*, doi:10.1016/j.jclepro.2020.121119.
1531. Cai, W.; Liu, C.; Jia, S.; Chan, F.; Ma, M.; Ma, X. An Emery-Based Sustainability

- Evaluation Method for Outsourcing Machining Resources. *Journal of Cleaner Production* **2020**, *245*, doi:10.1016/j.jclepro.2019.118849.
1532. Campitelli, A.; Cristóbal, J.; Fischer, J.; Becker, B.; Schebek, L. Resource Efficiency Analysis of Lubricating Strategies for Machining Processes Using Life Cycle Assessment Methodology. *Journal of Cleaner Production* **2019**, *222*, 464–475, doi:10.1016/j.jclepro.2019.03.073.
1533. Cao, Y.; Zhao, Y.; Wen, L.; Li, Y.; Li, H.; Wang, S.; Liu, Y.; Shi, Q.; Weng, J. System Dynamics Simulation for CO<sub>2</sub> Emission Mitigation in Green Electric-Coal Supply Chain. *Journal of Cleaner Production* **2019**, *232*, 759–773, doi:10.1016/j.jclepro.2019.06.029.
1534. Cascione, V.; Roberts, M.; Allen, S.; Dams, B.; Maskell, D.; Shea, A.; Walker, P.; Emmitt, S. Integration of Life Cycle Assessments (LCA) in Circular Bio-Based Wall Panel Design. *Journal of Cleaner Production* **2022**, *344*, doi:10.1016/j.jclepro.2022.130938.
1535. Chan, R.; Santana, M.; Oda, A.; Paniguel, R.; Vieira, L.; Figueiredo, A.; Galobardes, I. Analysis of Potential Use of Fibre Reinforced Recycled Aggregate Concrete for Sustainable Pavements. *Journal of Cleaner Production* **2019**, *218*, 183–191, doi:10.1016/j.jclepro.2019.01.221.
1536. Chandran, D.; Khalid, M.; Raviadaran, R.; Lau, H.; Yung, C.; Kanesan, D.; Salim, M. Sustainability of Water in Diesel Emulsion Fuel: An Assessment of Its Corrosion Behaviour towards Copper. *Journal of Cleaner Production* **2019**, *220*, 1005–1013, doi:10.1016/j.jclepro.2019.02.210.
1537. Chen, M.; Zhong, H.; Chen, L.; Zhang, Y.; Zhang, M. Engineering Properties and Sustainability Assessment of Recycled Fibre Reinforced Rubberised Cementitious Composite. *Journal of Cleaner Production* **2021**, *278*, doi:10.1016/j.jclepro.2020.123996.
1538. Chen, X.; Wang, G.; Dong, Q.; Zhao, X.; Wang, Y. Microscopic Characterizations of Pervious Concrete Using Recycled Steel Slag Aggregate. *Journal of Cleaner Production* **2020**, *254*, doi:10.1016/j.jclepro.2020.120149.
1539. Chen, Y.; Fang, Y.; Feng, W.; Zhang, Y.; Zhao, G.X. How to Minimise the Carbon Emission of Steel Building Products from a Cradle-to-Site Perspective: A Systematic Review of Recent Global Research. *Journal of Cleaner Production* **2022**, *368*, doi:10.1016/j.jclepro.2022.133156.
1540. Chen, Z.; Leng, Z.; Jiao, Y.; Xu, F.; Lin, J.; Wang, H.; Cai, J.; Zhu, L.; Zhang, Y.; Feng, N.; et al. Innovative Use of Industrially Produced Steel Slag Powders in Asphalt Mixture to Replace Mineral Fillers. *Journal of Cleaner Production* **2022**, *344*, doi:10.1016/j.jclepro.2022.131124.
1541. Cheng, B.; Lu, K.; Li, J.; Chen, H.; Luo, X.; Shafique, M. Comprehensive Assessment of Embodied Environmental Impacts of Buildings Using Normalized Environmental Impact Factors. *Journal of Cleaner Production* **2022**, *334*, doi:10.1016/j.jclepro.2021.130083.
1542. Cherubini, E.; Zanghelini, G.M.; Piemonte, D.; Muller, N.B.; Dias, R.; Kabe, Y.H.O.;

- Soto, J. Environmental Sustainability for Highways Operation: Comparative Analysis of Plastic and Steel Screen Anti-Glare Systems. *Journal of Cleaner Production* **2019**, *240*, doi:10.1016/j.jclepro.2019.118152.
1543. Chinchillas-Chinchillas, M.; Gaxiola, A.; Alvarado-Beltran, C.; Orozco-Carmona, V.; Pellegrini-Cervantes, M.; Rodriguez-Rodriguez, M.; Castro-Beltran, A. A New Application of Recycled-PET/PAN Composite Nanofibers to Cement-Based Materials. *Journal of Cleaner Production* **2020**, *252*, doi:10.1016/j.jclepro.2019.119827.
1544. Chisalita, D.-A.; Petrescu, L.; Cobden, P.; van Dijk, H.A.J.E.; Cormos, A.-M.; Cormos, C.-C. Assessing the Environmental Impact of an Integrated Steel Mill with Post-Combustion CO<sub>2</sub> Capture and Storage Using the LCA Methodology. *Journal of Cleaner Production* **2019**, *211*, 1015–1025, doi:10.1016/j.jclepro.2018.11.256.
1545. Chu, Y.; Sun, L.; Li, L. Lightweight Scheme Selection for Automotive Safety Structures Using a Quantifiable Multi-Objective Approach. *Journal of Cleaner Production* **2019**, *241*, doi:10.1016/j.jclepro.2019.118316.
1546. Cloete, S.; Ruhnu, O.; Cloete, J.H.; Hirth, L. Blue Hydrogen and Industrial Base Products: The Future of Fossil Fuel Exporters in a Net-Zero World. *Journal of Cleaner Production* **2022**, *363*, doi:10.1016/j.jclepro.2022.132347.
1547. Coppola, L.; Coffetti, D.; Crotti, E.; Gazzaniga, G.; Pastore, T. An Empathetic Added Sustainability Index (EASI) for Cementitious Based Construction Materials. *Journal of Cleaner Production* **2019**, *220*, 475–482, doi:10.1016/j.jclepro.2019.02.160.
1548. Cordier, S.; Robichaud, F.; Blanchet, P.; Amor, B. Regional Environmental Life Cycle Consequences of Material Substitutions: The Case of Increasing Wood Structures for Non-Residential Buildings. *Journal of Cleaner Production* **2021**, *328*, doi:10.1016/j.jclepro.2021.129671.
1549. Cravioto, J.; Yamasue, E.; Nguyen, D.-Q.; Huy, T.-D. Benefits of a Regional Co-Processing Scheme: The Case of Steel/Iron and Cement Industries in Vietnam, Laos, and Cambodia. *Journal of Cleaner Production* **2021**, *312*, doi:10.1016/j.jclepro.2021.127702.
1550. Cucina, M.; Carlet, L.; De Nisi, P.; Somensi, C.A.; Giordano, A.; Adani, F. Degradation of Biodegradable Bioplastics under Thermophilic Anaerobic Digestion: A Full-Scale Approach. *Journal of Cleaner Production* **2022**, *368*, doi:10.1016/j.jclepro.2022.133232.
1551. Cui, L.; Liu, M.; Yuan, X.; Wang, Q.; Ma, Q.; Wang, P.; Hong, J.; Liu, H. Environmental and Economic Impact Assessment of Three Sintering Flue Gas Treatment Technologies in the Iron and Steel Industry. *Journal of Cleaner Production* **2021**, *311*, doi:10.1016/j.jclepro.2021.127703.
1552. Cui, X.; Geng, Y.; Sun, R.; Xie, M.; Feng, X.; Li, X.; Cui, Z. Distribution, Speciation and Ecological Risk Assessment of Heavy Metals in Jinan Iron & Steel Group Soils from China. *Journal of Cleaner Production* **2021**, *295*, doi:10.1016/j.jclepro.2021.126504.
1553. Cui, Y.; Zhou, Z.; Gao, Y.; Lei, L.; Cao, J.; Wu, R.; Liang, L.; Huang, Z. Energy



- Saving Intermittent Electro-Fenton System Combined with Commercial MoS<sub>2</sub> for Effective Rhodamine B Degradation. *Journal of Cleaner Production* **2021**, 289, doi:10.1016/j.jclepro.2021.125807.
1554. Cusenza, M.A.; Bobba, S.; Ardente, F.; Cellura, M.; Di Persio, F. Energy and Environmental Assessment of a Traction Lithium-Ion Battery Pack for Plug-in Hybrid Electric Vehicles. *Journal of Cleaner Production* **2019**, 215, 634–649, doi:10.1016/j.jclepro.2019.01.056.
1555. D'Amico, B.; Pomponi, F.; Hart, J. Global Potential for Material Substitution in Building Construction: The Case of Cross Laminated Timber. *Journal of Cleaner Production* **2021**, 279, doi:10.1016/j.jclepro.2020.123487.
1556. d'Amore, F.; Romano, M.C.; Bezzo, F. Carbon Capture and Storage from Energy and Industrial Emission Sources: A Europe-Wide Supply Chain Optimisation. *Journal of Cleaner Production* **2021**, 290, doi:10.1016/j.jclepro.2020.125202.
1557. Dai, M.; Wang, P.; Chen, W.; Liu, G. Scenario Analysis of China's Aluminum Cycle Reveals the Coming Scrap Age and the End of Primary Aluminum Boom. *Journal of Cleaner Production* **2019**, 226, 793–804, doi:10.1016/j.jclepro.2019.04.029.
1558. De Bortoli, L.S.; Schabbach, L.M.; Fredel, M.C.; Hotza, D.; Henriques, B. Ecological Footprint of Biomaterials for Implant Dentistry: Is the Metal-Free Practice an Eco-Friendly Shift? *Journal of Cleaner Production* **2019**, 213, 723–732, doi:10.1016/j.jclepro.2018.12.189.
1559. de Brito, J.; Kurda, R. The Past and Future of Sustainable Concrete: A Critical Review and New Strategies on Cement-Based Materials. *Journal of Cleaner Production* **2021**, 281, doi:10.1016/j.jclepro.2020.123558.
1560. De Gisi, S.; Romaniello, L.; Dalessandro, M.; Todaro, F.; Notarnicola, M. Recovery of Iron Rich Residues from Integrated Steel Making Process by Hydrated Lime/Molasses Pressurised Cold Agglomeration. *Journal of Cleaner Production* **2019**, 233, 830–840, doi:10.1016/j.jclepro.2019.06.113.
1561. Deetman, S.; Marinova, S.; van der Voet, E.; van Vuuren, D.P.; Edelenbosch, O.; Heijungs, R. Modelling Global Material Stocks and Flows for Residential and Service Sector Buildings towards 2050. *Journal of Cleaner Production* **2020**, 245, doi:10.1016/j.jclepro.2019.118658.
1562. Dezhampanah, S.; Nikbin, I.; Charkhtab, S.; Fakhimi, F.; Bazkiaei, S.M.; Mohebbi, R. Environmental Performance and Durability of Concrete Incorporating Waste Tire Rubber and Steel Fiber Subjected to Acid Attack. *Journal of Cleaner Production* **2020**, 268, doi:10.1016/j.jclepro.2020.122216.
1563. di Summa, D.; Tenório Filho, J.R.; Snoeck, D.; Van den Heede, P.; Van Vlierberghe, S.; Ferrara, L.; De Belie, N. Environmental and Economic Sustainability of Crack Mitigation in Reinforced Concrete with SuperAbsorbent Polymers (SAPs). *Journal of Cleaner Production* **2022**, 358, doi:10.1016/j.jclepro.2022.131998.
1564. Díaz-Ramírez, M.C.; Bleuca-de-Pedro, M.; Arnal, A.J.; Post, J. Acid/Base Flow Battery Environmental and Economic Performance Based on Its Potential Service to Renewables Support. *Journal of Cleaner Production* **2022**, 330,

- doi:10.1016/j.jclepro.2021.129529.
1565. Diener, D.L.; Kushnir, D.; Tillman, A.-M. Scrap Happens: A Case of Industrial End-Users, Maintenance and Component Remanufacturing Outcome. *Journal of Cleaner Production* **2019**, *213*, 863–871, doi:10.1016/j.jclepro.2018.12.186.
1566. Ding, H.; Zheng, H.; Liang, X.; Ren, L. Getting Ready for Carbon Capture and Storage in the Iron and Steel Sector in China: Assessing the Value of Capture Readiness. *Journal of Cleaner Production* **2020**, *244*, doi:10.1016/j.jclepro.2019.118953.
1567. Dong, Q.; Wang, G.; Chen, X.; Tan, J.; Gu, X. Recycling of Steel Slag Aggregate in Portland Cement Concrete: An Overview. *Journal of Cleaner Production* **2021**, *282*, doi:10.1016/j.jclepro.2020.124447.
1568. Dräger, P.; Letmathe, P. Value Losses and Environmental Impacts in the Construction Industry – Tradeoffs or Correlates? *Journal of Cleaner Production* **2022**, *336*, doi:10.1016/j.jclepro.2022.130435.
1569. Du, H.; Xu, D.; Li, X.; Li, J.; Ni, W.; Li, Y.; Fu, P. Application of Molten Iron Desulfurization Slag to Replace Steel Slag as an Alkaline Component in Solid Waste-Based Cementitious Materials. *Journal of Cleaner Production* **2022**, *377*, doi:10.1016/j.jclepro.2022.134353.
1570. Echeverria, C.A.; Handoko, W.; Pahlevani, F.; Sahajwalla, V. Cascading Use of Textile Waste for the Advancement of Fibre Reinforced Composites for Building Applications. *Journal of Cleaner Production* **2019**, *208*, 1524–1536, doi:10.1016/j.jclepro.2018.10.227.
1571. Esther, L.-A.; Pedro, L.-G.; Irune, I.-V.; Gerardo, F. Comprehensive Analysis of the Environmental Impact of Electric Arc Furnace Steel Slag on Asphalt Mixtures. *Journal of Cleaner Production* **2020**, *275*, doi:10.1016/j.jclepro.2020.123121.
1572. Fakhri, M.; Bahmai, B.B.; Javadi, S.; Sharafi, M. An Evaluation of the Mechanical and Self-Healing Properties of Warm Mix Asphalt Containing Scrap Metal Additives. *Journal of Cleaner Production* **2020**, *253*, doi:10.1016/j.jclepro.2020.119963.
1573. Faragò, M.; Brudler, S.; Godskesen, B.; Rygaard, M. An Eco-Efficiency Evaluation of Community-Scale Rainwater and Stormwater Harvesting in Aarhus, Denmark. *Journal of Cleaner Production* **2019**, *219*, 601–612, doi:10.1016/j.jclepro.2019.01.265.
1574. Farfan, J.; Fasihi, M.; Breyer, C. Trends in the Global Cement Industry and Opportunities for Long-Term Sustainable CCU Potential for Power-to-X. *Journal of Cleaner Production* **2019**, *217*, 821–835, doi:10.1016/j.jclepro.2019.01.226.
1575. Farjana, S.; Huda, N.; Mahmud, M.; Saidur, R. A Review on the Impact of Mining and Mineral Processing Industries through Life Cycle Assessment. *Journal of Cleaner Production* **2019**, *231*, 1200–1217, doi:10.1016/j.jclepro.2019.05.264.
1576. Feng, C.; Zhu, R.; Wei, G.; Dong, K.; Dong, J. Typical Case of Carbon Capture and Utilization in Chinese Iron and Steel Enterprises: CO<sub>2</sub> Emission Analysis. *Journal of Cleaner Production* **2022**, *363*, doi:10.1016/j.jclepro.2022.132528.
1577. Fernandes, F.; Ferreira, L.; da Silva, M. Evaluation of the Corrosion Inhibitory Effect of the Ecofriendly Additive of Terminalia Catappa Leaf Extract Added to Soybean Oil Biodiesel in Contact with Zinc and Carbon Steel 1020. *Journal of*

- Cleaner Production* **2021**, 321, doi:10.1016/j.jclepro.2021.128863.
1578. Franco de Carvalho, J.M.; Fontes, W.C.; Azevedo, C.F.D.; Brigolini, G.J.; Schmidt, W.; Peixoto, R.A.F. Enhancing the Eco-Efficiency of Concrete Using Engineered Recycled Mineral Admixtures and Recycled Aggregates. *Journal of Cleaner Production* **2020**, 257, doi:10.1016/j.jclepro.2020.120530.
1579. Freund, J.; Gast, K.; Zuegge, K.; Hicks, A. Environmental Considerations in the Selection of Medical Staplers: A Comparative Life Cycle Assessment. *Journal of Cleaner Production* **2022**, 371, doi:10.1016/j.jclepro.2022.133490.
1580. Gajrani, K.K.; Suvin, P.S.; Kailas, S.V.; Sankar, M.R. Hard Machining Performance of Indigenously Developed Green Cutting Fluid Using Flood Cooling and Minimum Quantity Cutting Fluid. *Journal of Cleaner Production* **2019**, 206, 108–123, doi:10.1016/j.jclepro.2018.09.178.
1581. Gallego-Schmid, A.; Chen, H.; Sharmina, M.; Mendoza, J. Links between Circular Economy and Climate Change Mitigation in the Built Environment. *Journal of Cleaner Production* **2020**, 260, doi:10.1016/j.jclepro.2020.121115.
1582. Gao, D.; Yan, H.; Yang, L.; Pang, Y.; Sun, B. Analysis of Bond Performance of Steel Bar in Steel-Polypropylene Hybrid Fiber Reinforced Concrete with Partially Recycled Coarse Aggregates. *Journal of Cleaner Production* **2022**, 370, doi:10.1016/j.jclepro.2022.133528.
1583. Gao, S.; Cui, X.; Kang, S.; Ding, Y. Sustainable Applications for Utilizing Molybdenum Tailings in Concrete. *Journal of Cleaner Production* **2020**, 266, doi:10.1016/j.jclepro.2020.122020.
1584. Gao, T.; Dai, T.; Shen, L.; Jiang, L. Benefits of Using Steel Slag in Cement Clinker Production for Environmental Conservation and Economic Revenue Generation. *Journal of Cleaner Production* **2021**, 282, doi:10.1016/j.jclepro.2020.124538.
1585. Gao, X.; Nakatani, J.; Zhang, Q.; Huang, B.; Wang, T.; Moriguchi, Y. Dynamic Material Flow and Stock Analysis of Residential Buildings by Integrating Rural-Urban Land Transition: A Case of Shanghai. *Journal of Cleaner Production* **2020**, 253, doi:10.1016/j.jclepro.2019.119941.
1586. Gao, Y.; Yue, T.; Sun, W.; He, D.; Lu, C.; Fu, X. Acid Recovering and Iron Recycling from Pickling Waste Acid by Extraction and Spray Pyrolysis Techniques. *Journal of Cleaner Production* **2021**, 312, doi:10.1016/j.jclepro.2021.127747.
1587. Garcia, M.V.; Lopes, J.C.; Diniz, A.E.; Rodrigues, A.R.; Volpato, R.S.; Sanchez, L.E.D.A.; de Mello, H.J.; Aguiar, P.R.; Bianchi, E.C. Grinding Performance of Bearing Steel Using MQL under Different Dilutions and Wheel Cleaning for Green Manufacture. *Journal of Cleaner Production* **2020**, 257, doi:10.1016/j.jclepro.2020.120376.
1588. García, S.G.; Montequín, V.R.; Fernández, R.L.; Fernández, F.O. Evaluation of the Synergies in Cogeneration with Steel Waste Gases Based on Life Cycle Assessment: A Combined Coke Oven and Steelmaking Gas Case Study. *Journal of Cleaner Production* **2019**, 217, 576–583, doi:10.1016/j.jclepro.2019.01.262.
1589. Garvey, A.; Norman, J.B.; Barrett, J. Technology and Material Efficiency Scenarios

- for Net Zero Emissions in the UK Steel Sector. *Journal of Cleaner Production* **2022**, *333*, doi:10.1016/j.jclepro.2021.130216.
1590. Goffin, N.; Jones, L.C.R.; Tyrer, J.; Ouyang, J.; Mativenga, P.; Woolley, E. Mathematical Modelling for Energy Efficiency Improvement in Laser Welding. *Journal of Cleaner Production* **2021**, *322*, doi:10.1016/j.jclepro.2021.129012.
1591. Gomes, G.J.C.; Magalhães, A.J.; Rocha, F.L.L.; Fonseca, A. A Sustainability-Oriented Framework for the Application of Industrial Byproducts to the Base Layers of Low-Volume Roads. *Journal of Cleaner Production* **2021**, *295*, doi:10.1016/j.jclepro.2021.126440.
1592. Gomes, R.; Silvestre, J.D.; de Brito, J.; Lasvaux, S. Environmental Datasets for Cement and Steel Rebars to Be Used as Generic for a National Context. *Journal of Cleaner Production* **2021**, *316*, doi:10.1016/j.jclepro.2021.128003.
1593. Gómez de Cózar, J.C.; Martínez, A.G.; López, Í.A.; Alfonso, M.R. Life Cycle Assessment as a Decision-Making Tool for Selecting Building Systems in Heritage Intervention: Case Study of Roman Theatre in Itálica, Spain. *Journal of Cleaner Production* **2019**, *206*, 27–39, doi:10.1016/j.jclepro.2018.09.169.
1594. Gomez, V.; Wright, K.; Esquenazi, G.L.; Barron, A.R. Microwave Treatment of a Hot Mill Sludge from the Steel Industry: En Route to Recycling an Industrial Waste. *Journal of Cleaner Production* **2019**, *207*, 182–189, doi:10.1016/j.jclepro.2018.08.294.
1595. Gontia, P.; Thuvander, L.; Wallbaum, H. Spatiotemporal Characteristics of Residential Material Stocks and Flows in Urban, Commuter, and Rural Settlements. *Journal of Cleaner Production* **2020**, *251*, doi:10.1016/j.jclepro.2019.119435.
1596. González-Vallejo, P.; Muñoz-Sanguinetti, C.; Marrero, M. Environmental and Economic Assessment of Dwelling Construction in Spain and Chile. A Comparative Analysis of Two Representative Case Studies. *Journal of Cleaner Production* **2019**, *208*, 621–635, doi:10.1016/j.jclepro.2018.10.063.
1597. Gromboni, M.F.; Sales, A.; Rezende, M.D.A.M.; Moretti, J.P.; Corradini, P.G.; Mascaro, L.H. Impact of Agro-Industrial Waste on Steel Corrosion Susceptibility in Media Simulating Concrete Pore Solutions. *Journal of Cleaner Production* **2021**, *284*, doi:10.1016/j.jclepro.2020.124697.
1598. Gu, F.; Zhang, Y.; Su, Z.; Tu, Y.; Liu, S.; Jiang, T. Recovery of Chromium from Chromium-Bearing Slags Produced in the Stainless-Steel Smelting: A Review. *Journal of Cleaner Production* **2021**, *296*, doi:10.1016/j.jclepro.2021.126467.
1599. Guo, F.; Xi, X.; Ma, L.; Nie, Z. Property and Mechanism on Sorption of Molybdenum from Tungstate Solution with a Porous Amine Resin. *Journal of Cleaner Production* **2022**, *335*, doi:10.1016/j.jclepro.2021.130304.
1600. Gupta, M.; Song, Q.; Liu, Z.; Pruncu, C.; Mia, M.; Singh, G.; Lozano, J.; Carou, D.; Khan, A.; Jamil, M.; et al. Machining Characteristics Based Life Cycle Assessment in Eco-Benign Turning of Pure Titanium Alloy. *Journal of Cleaner Production* **2020**, *251*, doi:10.1016/j.jclepro.2019.119598.

1601. Hagedorn, W.; Jäger, S.; Wieczorek, L.; Kronenberg, P.; Greiff, K.; Weber, S.; Roettger, A. More than Recycling – The Potential of the Circular Economy Shown by a Case Study of the Metal Working Industry. *Journal of Cleaner Production* **2022**, *377*, doi:10.1016/j.jclepro.2022.134439.
1602. Hamuyuni, J.; Johto, H.; Bunjaku, A.; Vatanen, S.; Pajula, T.; Mäkelä, P.; Lindgren, M. Simulation-Based Life Cycle Assessment of Ferrochrome Smelting Technologies to Determine Environmental Impacts. *Journal of Cleaner Production* **2021**, *295*, doi:10.1016/j.jclepro.2021.126503.
1603. Hankel, J.; Jäger, S.; Weber, S. Development of a Recycling Strategy for Grinding Sludge Using Supersolidus Liquid Phase Sintering. *Journal of Cleaner Production* **2020**, *263*, doi:10.1016/j.jclepro.2020.121501.
1604. Her, S.; Park, T.; Zalnezhad, E.; Bae, S. Synthesis and Characterization of Cement Clinker Using Recycled Pulverized Oyster and Scallop Shell as Limestone Substitutes. *Journal of Cleaner Production* **2021**, *278*, doi:10.1016/j.jclepro.2020.123987.
1605. Heravi, G.; Rostami, M.; Kebria, M.F. Energy Consumption and Carbon Emissions Assessment of Integrated Production and Erection of Buildings' Pre-Fabricated Steel Frames Using Lean Techniques. *Journal of Cleaner Production* **2020**, *253*, doi:10.1016/j.jclepro.2020.120045.
1606. Hernández-Betancur, J.D.; Hernández, H.F.; Ocampo-Carmona, L.M. A Holistic Framework for Assessing Hot-Dip Galvanizing Process Sustainability. *Journal of Cleaner Production* **2019**, *206*, 755–766, doi:10.1016/j.jclepro.2018.09.177.
1607. Hossain, F.M.; Nabi, M.N.; Rainey, T.J.; Bodisco, T.; Bayley, T.; Randall, D.; Ristovski, Z.; Brown, R.J. Novel Biofuels Derived from Waste Tyres and Their Effects on Reducing Oxides of Nitrogen and Particulate Matter Emissions. *Journal of Cleaner Production* **2020**, *242*, doi:10.1016/j.jclepro.2019.118463.
1608. Hosseinian, S.M.; Ghahari, S.M. The Relationship between Structural Parameters and Water Footprint of Residential Buildings. *Journal of Cleaner Production* **2021**, *279*, doi:10.1016/j.jclepro.2020.123562.
1609. Hou, W.; Zheng, Y.; Guo, W.; Pengcheng, G. Piezoelectric Vibration Energy Harvesting for Rail Transit Bridge with Steel-Spring Floating Slab Track System. *Journal of Cleaner Production* **2021**, *291*, doi:10.1016/j.jclepro.2020.125283.
1610. Hua, H.; Jiang, S.; Sheng, H.; Zhang, Y.; Liu, X.; Zhang, L.; Yuan, Z.; Chen, T. A High Spatial-Temporal Resolution Emission Inventory of Multi-Type Air Pollutants for Wuxi City. *Journal of Cleaner Production* **2019**, *229*, 278–288, doi:10.1016/j.jclepro.2019.05.011.
1611. Huang, B.; Chen, Y.; McDowall, W.; Türkeli, S.; Bleischwitz, R.; Geng, Y. Embodied GHG Emissions of Building Materials in Shanghai. *Journal of Cleaner Production* **2019**, *210*, 777–785, doi:10.1016/j.jclepro.2018.11.030.
1612. Huang, D.; Dinga, C.D.; Tao, Y.; Wen, Z.; Wang, Y. Multi-Objective Optimization of Energy Conservation and Emission Reduction in China's Iron and Steel Industry Based on Dimensionality Reduction. *Journal of Cleaner Production* **2022**,

- 368, doi:10.1016/j.jclepro.2022.133131.
1613. Humbert, P.S.; Castro-Gomes, J. CO<sub>2</sub> Activated Steel Slag-Based Materials: A Review. *Journal of Cleaner Production* **2019**, *208*, 448–457, doi:10.1016/j.jclepro.2018.10.058.
1614. Huo, Y.; Khan, A.; Liu, Y.; Wang, Z.; Yu, Y.; Sun, T.; Liang, D.; Su, T.; Ri, K.; Xie, X.; et al. Conversion of Fe-Bearing Minerals in Sludge to Nanorod Erdite for Real Electroplating Wastewater Treatment: Comparative Study between Ferrihydrite, Hematite, Magnetite, and Troilite. *Journal of Cleaner Production* **2021**, *298*, doi:10.1016/j.jclepro.2021.126826.
1615. Iuorio, O.; Napolano, L.; Fiorino, L.; Landolfo, R. The Environmental Impacts of an Innovative Modular Lightweight Steel System: The Elissa Case. *Journal of Cleaner Production* **2019**, *238*, doi:10.1016/j.jclepro.2019.117905.
1616. Jacobasch, E.; Herz, G.; Rix, C.; Müller, N.; Reichelt, E.; Jahn, M.; Michaelis, A. Economic Evaluation of Low-Carbon Steelmaking via Coupling of Electrolysis and Direct Reduction. *Journal of Cleaner Production* **2021**, *328*, doi:10.1016/j.jclepro.2021.129502.
1617. Jamil, M.; He, N.; Zhao, W.; Xiang, H.; Gupta, M.; Iqbal, A.; Khan, A. Assessment of Energy Consumption, Carbon Emissions and Cost Metrics under Hybrid MQL-Dry Ice Blasting System: A Novel Cleaner Production Technology for Manufacturing Sectors. *Journal of Cleaner Production* **2022**, *360*, doi:10.1016/j.jclepro.2022.132111.
1618. Jeong, K.; Ji, C.; Kim, H.; Hong, T.; Cho, K.; Lee, J. An Integrated Assessment of the Environmental, Human Health, and Economic Impacts Based on Life Cycle Assessment: A Case Study of the Concrete and Steel Sumps. *Journal of Cleaner Production* **2019**, *239*, doi:10.1016/j.jclepro.2019.118032.
1619. Jiang, Y.; Zhang, J.; Asante, D.; Yang, Y. Dynamic Evaluation of Low-Carbon Competitiveness(LCC) Based on Improved Technique for Order Preference by Similarity to an Ideal Solution (TOPSIS) Method: A Case Study of Chinese Steelworks. *Journal of Cleaner Production* **2019**, *217*, 484–492, doi:10.1016/j.jclepro.2019.01.054.
1620. John, N.; Wesseling, J.H.; Worrell, E.; Hekkert, M. How Key-Enabling Technologies' Regimes Influence Sociotechnical Transitions: The Impact of Artificial Intelligence on Decarbonization in the Steel Industry. *Journal of Cleaner Production* **2022**, *370*, doi:10.1016/j.jclepro.2022.133624.
1621. Kalt, G.; Thunshirn, P.; Krausmann, F.; Haberl, H. Material Requirements of Global Electricity Sector Pathways to 2050 and Associated Greenhouse Gas Emissions. *Journal of Cleaner Production* **2022**, *358*, doi:10.1016/j.jclepro.2022.132014.
1622. Kan, T.; Strezov, V.; Evans, T.; Kumar, R.; He, J.; Zhou, X.; Ren, J.; Lu, Q. Catalytic Pyrolysis of Biomass Impregnated with Elements from Steelmaking Slag Leaching and Simultaneous Fabrication of Phosphorus Adsorbent. *Journal of Cleaner Production* **2021**, *328*, doi:10.1016/j.jclepro.2021.129490.

1623. Kawajiri, K.; Kobayashi, M.; Sakamoto, K. Lightweight Materials Equal Lightweight Greenhouse Gas Emissions?: A Historical Analysis of Greenhouse Gases of Vehicle Material Substitution. *Journal of Cleaner Production* **2020**, *253*, doi:10.1016/j.jclepro.2019.119805.
1624. Keshavarz, Z.; Mostofinejad, D. Steel Chip and Porcelain Ceramic Wastes Used as Replacements for Coarse Aggregates in Concrete. *Journal of Cleaner Production* **2019**, *230*, 339–351, doi:10.1016/j.jclepro.2019.05.010.
1625. Khalid, Y.; Wu, M.; Silaen, A.; Martinez, F.; Okosun, T.; Worl, B.; Low, J.; Zhou, C.; Johnson, K.; White, D. Oxygen Enrichment Combustion to Reduce Fossil Energy Consumption and Emissions in Hot Rolling Steel Production. *Journal of Cleaner Production* **2021**, *320*, doi:10.1016/j.jclepro.2021.128714.
1626. Khan, A.M.; Alkahtani, M.; Sharma, S.; Jamil, M.; Iqbal, A.; He, N. Sustainability-Based Holistic Assessment and Determination of Optimal Resource Consumption for Energy-Efficient Machining of Hardened Steel. *Journal of Cleaner Production* **2021**, *319*, doi:10.1016/j.jclepro.2021.128674.
1627. Kim, I.; Jang, Y. Material Efficiency and Greenhouse Gas Reduction Effect of Industrial Waste by Material Circulation in Korea. *Journal of Cleaner Production* **2022**, *376*, doi:10.1016/j.jclepro.2022.134053.
1628. Kim, S.; Kim, S. Design Optimization of Noise Barrier Tunnels through Component Reuse: Minimization of Costs and CO<sub>2</sub> Emissions Using Multi-Objective Genetic Algorithm. *Journal of Cleaner Production* **2021**, *298*, doi:10.1016/j.jclepro.2021.126697.
1629. Kim, S.; Chung, H.; Jeong, S.; Nam, K. Identification of PH-Dependent Removal Mechanisms of Lead and Arsenic by Basic Oxygen Furnace Slag: Relative Contribution of Precipitation and Adsorption. *Journal of Cleaner Production* **2021**, *279*, doi:10.1016/j.jclepro.2020.123451.
1630. Klimeš, L.; Březina, M.; Mauder, T.; Charvát, P.; Klemeš, J.J.; Štětina, J. Dry Cooling as a Way toward Minimisation of Water Consumption in the Steel Industry: A Case Study for Continuous Steel Casting. *Journal of Cleaner Production* **2020**, *275*, doi:10.1016/j.jclepro.2020.123109.
1631. Kong, Y.K.; Kurumisawa, K.; Chu, S.H. Infilled Cementitious Composites (ICC) – A Comparative Life Cycle Assessment with UHPC. *Journal of Cleaner Production* **2022**, *377*, doi:10.1016/j.jclepro.2022.134051.
1632. Kristiansen, A.B.; Zhao, B.Y.; Ma, T.; Wang, R.Z. The Viability of Solar Photovoltaic Powered Off-Grid Zero Energy Buildings Based on a Container Home. *Journal of Cleaner Production* **2021**, *286*, doi:10.1016/j.jclepro.2020.125312.
1633. Kumar, D.; Sharma, C. Paper Industry Wastewater Treatment by Electrocoagulation and Aspect of Sludge Management. *Journal of Cleaner Production* **2022**, *360*, doi:10.1016/j.jclepro.2022.131970.
1634. Kumar, P.; Patra, S.K.; Tripathy, S.K.; Sahu, N. Efficient Utilization of Nickel Rich Chromite Ore Processing Tailings by Carbothermic Smelting. *Journal of Cleaner Production* **2021**, *315*, doi:10.1016/j.jclepro.2021.128046.

1635. Kumar, R.; Jesudoss Hynes, N.R.; Pruncu, C.I.; Jennifa Sujana, J.A. Multi-Objective Optimization of Green Technology Thermal Drilling Process Using Grey-Fuzzy Logic Method. *Journal of Cleaner Production* **2019**, *236*, doi:10.1016/j.jclepro.2019.117711.
1636. Kushnir, D.; Hansen, T.; Vogl, V.; Åhman, M. Adopting Hydrogen Direct Reduction for the Swedish Steel Industry: A Technological Innovation System (TIS) Study. *Journal of Cleaner Production* **2020**, *242*, doi:10.1016/j.jclepro.2019.118185.
1637. Kushwaha, S.; Ghosh, A.; Rao, A.K. Collection Activity Channels Selection in a Reverse Supply Chain under a Carbon Cap-and-Trade Regulation. *Journal of Cleaner Production* **2020**, *260*, doi:10.1016/j.jclepro.2020.121034.
1638. Lai, F.; Beylot, A.; Navarro, R.; Schimek, P.; Hartlieb, P.; Johansson, D.; Segarra, P.; Amor, C.; Villeneuve, J. The Environmental Performance of Mining Operations: Comparison of Alternative Mining Solutions in a Life Cycle Perspective. *Journal of Cleaner Production* **2021**, *315*, doi:10.1016/j.jclepro.2021.128030.
1639. Li, F.; Chu, M.; Tang, J.; Liu, Z.; Wang, J.; Li, S. Life-Cycle Assessment of the Coal Gasification-Shaft Furnace-Electric Furnace Steel Production Process. *Journal of Cleaner Production* **2021**, *287*, doi:10.1016/j.jclepro.2020.125075.
1640. Li, H.; Deng, Q.; Zhang, J.; Xia, B.; Skitmore, M. Assessing the Life Cycle CO<sub>2</sub> Emissions of Reinforced Concrete Structures: Four Cases from China. *Journal of Cleaner Production* **2019**, *210*, 1496–1506, doi:10.1016/j.jclepro.2018.11.102.
1641. Li, H.; Luo, Z.; Xu, X.; Cang, Y.; Yang, L. Assessing the Embodied Carbon Reduction Potential of Straw Bale Rural Houses by Hybrid Life Cycle Assessment: A Four-Case Study. *Journal of Cleaner Production* **2021**, *303*, doi:10.1016/j.jclepro.2021.127002.
1642. Li, J.; Xiao, F.; Zhang, L.; Amirkhanian, S.N. Life Cycle Assessment and Life Cycle Cost Analysis of Recycled Solid Waste Materials in Highway Pavement: A Review. *Journal of Cleaner Production* **2019**, *233*, 1182–1206, doi:10.1016/j.jclepro.2019.06.061.
1643. Li, J.; Zhang, S.; Nie, Y.; Ma, X.; Xu, L.; Wu, L. A Holistic Life Cycle Evaluation of Coking Production Covering Coke Oven Gas Purification Process Based on the Subdivision Method. *Journal of Cleaner Production* **2020**, *248*, doi:10.1016/j.jclepro.2019.119183.
1644. Li, M.; Gao, F.; Sun, B.; Liu, Y.; Gong, X.; Nie, Z. Zero Carbon-Emission Technology Route Construction and Multifactor Analysis of Aluminum Production in China. *Journal of Cleaner Production* **2022**, *370*, doi:10.1016/j.jclepro.2022.133535.
1645. Li, W.; Zhang, S.; Lu, C. Research on the Driving Factors and Carbon Emission Reduction Pathways of China's Iron and Steel Industry under the Vision of Carbon Neutrality. *Journal of Cleaner Production* **2022**, *361*, doi:10.1016/j.jclepro.2022.132237.
1646. Li, W.; Zhang, S.; Lu, C. Research on the Driving Factors and Carbon Emission



- Reduction Pathways of China's Iron and Steel Industry under the Vision of Carbon Neutrality. *Journal of Cleaner Production* **2022**, *357*, doi:10.1016/j.jclepro.2022.131990.
1647. Li, X.-J.; Lai, J.-Y.; Ma, C.-Y.; Wang, C. Using BIM to Research Carbon Footprint during the Materialization Phase of Prefabricated Concrete Buildings: A China Study. *Journal of Cleaner Production* **2021**, *279*, doi:10.1016/j.jclepro.2020.123454.
1648. Li, Y.; Qiao, C.; Ni, W. Green Concrete with Ground Granulated Blast-Furnace Slag Activated by Desulfurization Gypsum and Electric Arc Furnace Reducing Slag. *Journal of Cleaner Production* **2020**, *269*, doi:10.1016/j.jclepro.2020.122212.
1649. Li, Y.; Feng, H.; Wang, J.; She, X.; Wang, G.; Zuo, H.; Xue, Q. Current Status of the Technology for Utilizing Difficult-to-Treat Dust and Sludge Produced from the Steel Industry. *Journal of Cleaner Production* **2022**, *367*, doi:10.1016/j.jclepro.2022.132909.
1650. Liang, L.; Ridoutt, B.G.; Lal, R.; Wang, D.; Wu, W.; Peng, P.; Hang, S.; Wang, L.; Zhao, G. Nitrogen Footprint and Nitrogen Use Efficiency of Greenhouse Tomato Production in North China. *Journal of Cleaner Production* **2019**, *208*, 285–296, doi:10.1016/j.jclepro.2018.10.149.
1651. Liang, T.; Wang, S.; Lu, C.; Jiang, N.; Long, W.; Zhang, M.; Zhang, R. Environmental Impact Evaluation of an Iron and Steel Plant in China: Normalized Data and Direct/Indirect Contribution. *Journal of Cleaner Production* **2020**, *264*, doi:10.1016/j.jclepro.2020.121697.
1652. Lima, L.; Alvarenga, R.; Amaral, T.; Nolli, P.; Dewulf, J. Life Cycle Assessment of Ferroniobium and Niobium Oxides: Quantifying the Reduction of Environmental Impacts as a Result of Production Process Improvements. *Journal of Cleaner Production* **2022**, *348*, doi:10.1016/j.jclepro.2022.131327.
1653. Lin, B.; Wu, R. Designing Energy Policy Based on Dynamic Change in Energy and Carbon Dioxide Emission Performance of China's Iron and Steel Industry. *Journal of Cleaner Production* **2020**, *256*, doi:10.1016/j.jclepro.2020.120412.
1654. Lin, B.; Chen, X. Evaluating the CO<sub>2</sub> Performance of China's Non-Ferrous Metals Industry: A Total Factor Meta-Frontier Malmquist Index Perspective. *Journal of Cleaner Production* **2019**, *209*, 1061–1077, doi:10.1016/j.jclepro.2018.10.278.
1655. Liu, J.; Daigo, I.; Panasiuk, D.; Dunuwila, P.; Hamada, K.; Hoshino, T. Impact of Recycling Effect in Comparative Life Cycle Assessment for Materials Selection-A Case Study of Light-Weighting Vehicles. *Journal of Cleaner Production* **2022**, *349*, doi:10.1016/j.jclepro.2022.131317.
1656. Liu, K.; Xu, P.; Wang, F.; Jin, C.; Huang, M.; Dai, D.; Fu, C. Deicing Efficiency Analysis and Economic-Environment Assessment of a Novel Induction Heating Asphalt Pavement. *Journal of Cleaner Production* **2020**, *273*, doi:10.1016/j.jclepro.2020.123123.
1657. Liu, K.; Da, Y.; Wang, F.; Ding, W.; Xu, P.; Pang, H.; Zhu, T. An Eco-Friendly Asphalt Pavement Deicing Method by Microwave Heating and Its Comprehensive Environmental Assessments. *Journal of Cleaner Production* **2022**,

- 373, doi:10.1016/j.jclepro.2022.133899.
1658. Liu, K.; Fu, C.; Xu, P.; Li, S.; Huang, M. An Eco-Friendliness Inductive Asphalt Mixture Comprising Waste Steel Shavings and Waste Ferrites. *Journal of Cleaner Production* **2021**, *283*, doi:10.1016/j.jclepro.2020.124639.
1659. Liu, Y.; Chen, W.; Liu, X.; Shi, J.; Liu, N.; Ren, H.; Li, H.; Ulgiati, S. Multi-Objective Coordinated Development Paths for China's Steel Industry Chain Based on "Water-Energy-Economy" Dependence. *Journal of Cleaner Production* **2022**, *370*, doi:10.1016/j.jclepro.2022.133421.
1660. Liu, Y.; Li, H.; Huang, S.; An, H.; Santagata, R.; Ulgiati, S. Environmental and Economic-Related Impact Assessment of Iron and Steel Production. A Call for Shared Responsibility in Global Trade. *Journal of Cleaner Production* **2020**, *269*, doi:10.1016/j.jclepro.2020.122239.
1661. Liu, Z.; Liu, W.; Adams, M.; Cote, R.P.; Geng, Y.; Chen, S. A Hybrid Model of LCA and Emergy for Co-Benefits Assessment Associated with Waste and by-Product Reutilization. *Journal of Cleaner Production* **2019**, *236*, doi:10.1016/j.jclepro.2019.117670.
1662. Liu, Z.; Lu, Y.; Li, S.; Zong, S.; Yi, S. Flexural Behavior of Steel Fiber Reinforced Self-Stressing Recycled Aggregate Concrete-Filled Steel Tube. *Journal of Cleaner Production* **2020**, *274*, doi:10.1016/j.jclepro.2020.122724.
1663. Lonca, G.; Bernard, S.; Margni, M. A Versatile Approach to Assess Circularity: The Case of Decoupling. *Journal of Cleaner Production* **2019**, *240*, doi:10.1016/j.jclepro.2019.118174.
1664. Long, W.; Wang, S.; Lu, C.; Xue, R.; Liang, T.; Jiang, N.; Zhang, R. Quantitative Assessment of Energy Conservation Potential and Environmental Benefits of an Iron and Steel Plant in China. *Journal of Cleaner Production* **2020**, *273*, doi:10.1016/j.jclepro.2020.123163.
1665. Lopez, G.; Farfan, J.; Breyer, C. Trends in the Global Steel Industry: Evolutionary Projections and Defossilisation Pathways through Power-to-Steel. *Journal of Cleaner Production* **2022**, *375*, doi:10.1016/j.jclepro.2022.134182.
1666. López-Perales, J.F.; Contreras, J.E.; Vázquez-Rodríguez, F.J.; Gómez-Rodríguez, C.; Díaz-Tato, L.; Banda-Muñoz, F.; Rodríguez, E.A. Partial Replacement of a Traditional Raw Material by Blast Furnace Slag in Developing a Sustainable Conventional Refractory Castable of Improved Physical-Mechanical Properties. *Journal of Cleaner Production* **2021**, *306*, doi:10.1016/j.jclepro.2021.127266.
1667. Lu, C.; Li, W.; Gao, S. Driving Determinants and Prospective Prediction Simulations on Carbon Emissions Peak for China's Heavy Chemical Industry. *Journal of Cleaner Production* **2020**, *251*, doi:10.1016/j.jclepro.2019.119642.
1668. Lu, C.; Wang, S.; Wang, K.; Gao, Y.; Zhang, R. Uncovering the Benefits of Integrating Industrial Symbiosis and Urban Symbiosis Targeting a Resource-Dependent City: A Case Study of Yongcheng, China. *Journal of Cleaner Production* **2020**, *255*, doi:10.1016/j.jclepro.2020.120210.
1669. Lu, H.; Qi, C.; Li, C.; Gan, D.; Du, Y.; Li, S. A Light Barricade for Tailings Recycling

- as Cemented Paste Backfill. *Journal of Cleaner Production* **2020**, *247*, doi:10.1016/j.jclepro.2019.119388.
1670. Lu, Y.; Ding, Y.; Wang, M.; Yang, L.; Wang, Y. An Environmentally Friendly Laser Cleaning Method to Remove Oceanic Micro-Biofoulings from AH36 Steel Substrate and Corrosion Protection. *Journal of Cleaner Production* **2021**, *314*, doi:10.1016/j.jclepro.2021.127961.
1671. Luca, A.-V.; Petrescu, L. Membrane Technology Applied to Steel Production: Investigation Based on Process Modelling and Environmental Tools. *Journal of Cleaner Production* **2021**, *294*, doi:10.1016/j.jclepro.2021.126256.
1672. Lv, J.; Fu, M.; Gan, J.; Cao, Y.; Xiao, F. Study on the Treatment of Tempering Lubricant Wastewater in Steel Industry by Anaerobic/Aerobic Process. *Journal of Cleaner Production* **2022**, *355*, doi:10.1016/j.jclepro.2022.131754.
1673. Lv, W.; Sun, Z.; Su, Z. Life Cycle Energy Consumption and Greenhouse Gas Emissions of Iron Pelletizing Process in China, a Case Study. *Journal of Cleaner Production* **2019**, *233*, 1314–1321, doi:10.1016/j.jclepro.2019.06.180.
1674. Ma, N.; Sammon, W.J. Enhancement of In-Plant Recycling of Integrated Steel Mill Offgas Solid Wastes by Reallocating Crucial Zinc-Bearing Materials. *Journal of Cleaner Production* **2020**, *251*, doi:10.1016/j.jclepro.2019.119783.
1675. Mandova, H.; Patrizio, P.; Leduc, S.; Kjärstad, J.; Wang, C.; Wetterlund, E.; Kraxner, F.; Gale, W. Achieving Carbon-Neutral Iron and Steelmaking in Europe through the Deployment of Bioenergy with Carbon Capture and Storage. *Journal of Cleaner Production* **2019**, *218*, 118–129, doi:10.1016/j.jclepro.2019.01.247.
1676. Mao, J.; Xu, J.; Zhang, J.; Wu, K.; He, J.; Fan, W. Recycling Methodology of Chloride-Attacked Concrete Based on Electrochemical Treatment. *Journal of Cleaner Production* **2022**, *340*, doi:10.1016/j.jclepro.2022.130822.
1677. Marinova, S.; Deetman, S.; van der Voet, E.; Daioglou, V. Global Construction Materials Database and Stock Analysis of Residential Buildings between 1970–2050. *Journal of Cleaner Production* **2020**, *247*, doi:10.1016/j.jclepro.2019.119146.
1678. Marsh, A.; Velenturf, A.; Bernal, S. Circular Economy Strategies for Concrete: Implementation and Integration. *Journal of Cleaner Production* **2022**, *362*, doi:10.1016/j.jclepro.2022.132486.
1679. Mayer, J.; Bachner, G.; Steininger, K.W. Macroeconomic Implications of Switching to Process-Emission-Free Iron and Steel Production in Europe. *Journal of Cleaner Production* **2019**, *210*, 1517–1533, doi:10.1016/j.jclepro.2018.11.118.
1680. Mayyas, M.; Nekouei, R.K.; Sahajwalla, V. Valorization of Lignin Biomass as a Carbon Feedstock in Steel Industry: Iron Oxide Reduction, Steel Carburizing and Slag Foaming. *Journal of Cleaner Production* **2019**, *219*, 971–980, doi:10.1016/j.jclepro.2019.02.114.
1681. McAvoy, S.; Grant, T.; Smith, C.; Bontinck, P. Combining Life Cycle Assessment and System Dynamics to Improve Impact Assessment: A Systematic Review. *Journal of Cleaner Production* **2021**, *315*, doi:10.1016/j.jclepro.2021.128060.
1682. Mehdipour, S.; Nikbin, I.M.; Dezhmanpanah, S.; Mohebbi, R.; Moghadam, H.;

- Charkhtab, S.; Moradi, A. Mechanical Properties, Durability and Environmental Evaluation of Rubberized Concrete Incorporating Steel Fiber and Metakaolin at Elevated Temperatures. *Journal of Cleaner Production* **2020**, *254*, doi:10.1016/j.jclepro.2020.120126.
1683. Mele, M.; Magazzino, C. A Machine Learning Analysis of the Relationship among Iron and Steel Industries, Air Pollution, and Economic Growth in China. *Journal of Cleaner Production* **2020**, *277*, doi:10.1016/j.jclepro.2020.123293.
1684. Mendez-Alva, F.; Cervo, H.; Krese, G.; Van Eetvelde, G. Industrial Symbiosis Profiles in Energy-Intensive Industries: Sectoral Insights from Open Databases. *Journal of Cleaner Production* **2021**, *314*, doi:10.1016/j.jclepro.2021.128031.
1685. Meng, J.; Wang, T.; Shi, B.; Li, Q.; Wang, C.; Dai, L.; Su, G. Integrating Industrial Source and Environmental Sink towards Chromium Emission Evaluation in China: Insights from the Improved Substance Flow Analysis. *Journal of Cleaner Production* **2022**, *371*, doi:10.1016/j.jclepro.2022.133628.
1686. Merli, R.; Preziosi, M.; Acampora, A.; Lucchetti, M.; Petrucci, E. Recycled Fibers in Reinforced Concrete: A Systematic Literature Review. *Journal of Cleaner Production* **2020**, *248*, doi:10.1016/j.jclepro.2019.119207.
1687. Mia, M.; Gupta, M.; Lozano, J.; Carou, D.; Pimenov, D.; Krolczyk, G.; Khan, A.; Dhar, N. Multi-Objective Optimization and Life Cycle Assessment of Eco-Friendly Cryogenic N-2 Assisted Turning of Ti-6Al-4V. *Journal of Cleaner Production* **2019**, *210*, 121–133, doi:10.1016/j.jclepro.2018.10.334.
1688. Mirshekarlou, B.R.; Budayan, C.; Dikmen, I.; Birgonul, M.T. Development of a Knowledge-Based Tool for Waste Management of Prefabricated Steel Structure Projects. *Journal of Cleaner Production* **2021**, *323*, doi:10.1016/j.jclepro.2021.129140.
1689. Montalvo, F.F.; García-Alcaraz, J.L.; Cámara, E.M.; Jiménez-Macías, E.; Blanco-Fernández, J. Environmental Impact of Wine Fermentation in Steel and Concrete Tanks. *Journal of Cleaner Production* **2021**, *278*, doi:10.1016/j.jclepro.2020.123602.
1690. Munir, M.J.; Kazmi, S.M.S.; Wu, Y.-F.; Lin, X.; Ahmad, M.R. Development of Novel Design Strength Model for Sustainable Concrete Columns: A New Machine Learning-Based Approach. *Journal of Cleaner Production* **2022**, *357*, doi:10.1016/j.jclepro.2022.131988.
1691. Muslemanni, H.; Liang, X.; Kaesehage, K.; Ascui, F.; Wilson, J. Opportunities and Challenges for Decarbonizing Steel Production by Creating Markets for ‘Green Steel’ Products. *Journal of Cleaner Production* **2021**, *315*, doi:10.1016/j.jclepro.2021.128127.
1692. Nahangi, M.; Guven, G.; Olanrewaju, B.; Saxe, S. Embodied Greenhouse Gas Assessment of a Bridge: A Comparison of Preconstruction Building Information Model and Construction Records. *Journal of Cleaner Production* **2021**, *295*, doi:10.1016/j.jclepro.2021.126388.
1693. Nair, A.T.; Mathew, A.; A R, A.; Akbar, M.A. Use of Hazardous Electric Arc Furnace Dust in the Construction Industry: A Cleaner Production Approach. *Journal of Cleaner Production* **2022**, *377*, doi:10.1016/j.jclepro.2022.134282.

1694. Najm, O.; El-Hassan, H.; El-Dieb, A. Ladle Slag Characteristics and Use in Mortar and Concrete: A Comprehensive Review. *Journal of Cleaner Production* **2021**, *288*, doi:10.1016/j.jclepro.2020.125584.
1695. Nduagu, E.I.; Yadav, D.; Bhardwaj, N.; Elango, S.; Biswas, T.; Banerjee, R.; Rajagopalan, S. Comparative Life Cycle Assessment of Natural Gas and Coal-Based Directly Reduced Iron (DRI) Production: A Case Study for India. *Journal of Cleaner Production* **2022**, *347*, doi:10.1016/j.jclepro.2022.131196.
1696. Nguyen, H.; Staudacher, M.; Kinnunen, P.; Carvelli, V.; Illikainen, M. Multi-Fiber Reinforced Ettringite-Based Composites from Industrial Side Streams. *Journal of Cleaner Production* **2019**, *211*, 1065–1077, doi:10.1016/j.jclepro.2018.11.241.
1697. Nian, S.; Pham, T.; Haas, C.; Ibrahim, N.; Yoon, D.; Bregman, H. A Functional Demonstration of Adaptive Reuse of Waste into Modular Assemblies for Structural Applications: The Case of Bicycle Frames. *Journal of Cleaner Production* **2022**, *348*, doi:10.1016/j.jclepro.2022.131162.
1698. Nidheesh, P.V.; Kumar, M.S. An Overview of Environmental Sustainability in Cement and Steel Production. *Journal of Cleaner Production* **2019**, *231*, 856–871, doi:10.1016/j.jclepro.2019.05.251.
1699. Norbert, R.; Kim, J.; Griffay, G. A System Dynamics Framework for the Assessment of Resource and Energy Efficiency in Iron and Steel Plants. *Journal of Cleaner Production* **2020**, *276*, doi:10.1016/j.jclepro.2020.123663.
1700. Ochoa, G.V.; Prada, G.; Duarte-Forero, J. Carbon Footprint Analysis and Advanced Exergo-Environmental Modeling of a Waste Heat Recovery System Based on a Recuperative Organic Rankine Cycle. *Journal of Cleaner Production* **2020**, *274*, doi:10.1016/j.jclepro.2020.122838.
1701. Oda, J.; Akimoto, K. Carbon Intensity of the Japanese Iron and Steel Industry: Analysis of Factors from 2000 to 2019. *Journal of Cleaner Production* **2022**, *345*, doi:10.1016/j.jclepro.2022.130920.
1702. Oh, B.K.; Glisic, B.; Lee, S.H.; Cho, T.; Park, H.S. Comprehensive Investigation of Embodied Carbon Emissions, Costs, Design Parameters, and Serviceability in Optimum Green Construction of Two-Way Slabs in Buildings. *Journal of Cleaner Production* **2019**, *222*, 111–128, doi:10.1016/j.jclepro.2019.03.003.
1703. Oh, H.; Lee, S.; Beum, H.T.; Kim, J.; Kim, J.; Lee, S.-Y.; Lee, I.-B.; Yoon, Y.-S.; Han, S.S. CO Recovery from Blast Furnace Gas by Vacuum Pressure Swing Adsorption Process: Experimental and Simulation Approach. *Journal of Cleaner Production* **2022**, *346*, doi:10.1016/j.jclepro.2022.131062.
1704. Olabi, A.G.; Wilberforce, T.; Elsaid, K.; Sayed, E.T.; Maghrabie, H.M.; Abdelkareem, M.A. Large Scale Application of Carbon Capture to Process Industries – A Review. *Journal of Cleaner Production* **2022**, *362*, doi:10.1016/j.jclepro.2022.132300.
1705. Onuaguluchi, O.; Banthia, N. Value-Added Reuse of Scrap Tire Polymeric Fibers in Cement-Based Structural Applications. *Journal of Cleaner Production* **2019**, *231*, 543–555, doi:10.1016/j.jclepro.2019.05.225.

1706. Opher, T.; Duhamel, M.; Posen, I.D.; Panesar, D.K.; Brugmann, R.; Roy, A.; Zizzo, R.; Sequeira, L.; Anvari, A.; MacLean, H.L. Life Cycle GHG Assessment of a Building Restoration: Case Study of a Heritage Industrial Building in Toronto, Canada. *Journal of Cleaner Production* **2021**, 279, doi:10.1016/j.jclepro.2020.123819.
1707. Orsini, F.; Marrone, P. Approaches for a Low-Carbon Production of Building Materials: A Review. *Journal of Cleaner Production* **2019**, 241, doi:10.1016/j.jclepro.2019.118380.
1708. Ozturk, O.; Ozyurt, N. Sustainability and Cost-Effectiveness of Steel and Polypropylene Fiber Reinforced Concrete Pavement Mixtures. *Journal of Cleaner Production* **2022**, 363, doi:10.1016/j.jclepro.2022.132582.
1709. Ozturkoglu, Y.; Kazancoglu, Y.; Ozkan-Ozen, Y.D. A Sustainable and Preventative Risk Management Model for Ship Recycling Industry. *Journal of Cleaner Production* **2019**, 238, doi:10.1016/j.jclepro.2019.117907.
1710. Panjaitan, T.; Dargusch, P.; Wadley, D.; Aziz, A. Meeting International Standards of Cleaner Production in Developing Countries: Challenges and Financial Realities Facing the Indonesian Cement Industry. *Journal of Cleaner Production* **2021**, 318, doi:10.1016/j.jclepro.2021.128604.
1711. Park, H.; Woo, Y.; Jung, H.S.; Kim, G.; Bae, J.W.; Park, M.-J. Development of Dimethyl Ether Synthesis Processes Using By-Product Gas from a Steel-Making Plant: Single-vs. Two-Step Processes. *Journal of Cleaner Production* **2021**, 326, doi:10.1016/j.jclepro.2021.129367.
1712. Paulillo, A.; Cotton, L.; Law, R.; Striolo, A.; Lettieri, P. Geothermal Energy in the UK: The Life-Cycle Environmental Impacts of Electricity Production from the United Downs Deep Geothermal Power Project. *Journal of Cleaner Production* **2020**, 249, doi:10.1016/j.jclepro.2019.119410.
1713. Pauna, H.; Ernst, D.; Zarl, M.; Aula, M.; Schenk, J.; Huttula, M.; Fabritius, T. Hydrogen Plasma Smelting Reduction Process Monitoring with Optical Emission Spectroscopy – Establishing the Basis for the Method. *Journal of Cleaner Production* **2022**, 372, doi:10.1016/j.jclepro.2022.133755.
1714. Pereira, O.; Urbikain, G.; Rodríguez, A.; Calleja, A.; Ayesta, I.; López de Lacalle, L.N. Process Performance and Life Cycle Assessment of Friction Drilling on Dual-Phase Steel. *Journal of Cleaner Production* **2019**, 213, 1147–1156, doi:10.1016/j.jclepro.2018.12.250.
1715. Piao, Z.; Mikhailenko, P.; Kakar, M.; Bueno, M.; Hellweg, S.; Poulikakos, L. Urban Mining for Asphalt Pavements: A Review. *Journal of Cleaner Production* **2021**, 280, doi:10.1016/j.jclepro.2020.124916.
1716. Pimm, A.J.; Cockerill, T.T.; Gale, W.F. Energy System Requirements of Fossil-Free Steelmaking Using Hydrogen Direct Reduction. *Journal of Cleaner Production* **2021**, 312, doi:10.1016/j.jclepro.2021.127665.
1717. Pindar, S.; Dhawan, N. Microwave Processing of Spent Coin Cells for Recycling of Metallic Values. *Journal of Cleaner Production* **2021**, 280, doi:10.1016/j.jclepro.2020.124144.

1718. Pourmehdi, M.; Paydar, M.M.; Asadi-Gangraj, E. Scenario-Based Design of a Steel Sustainable Closed-Loop Supply Chain Network Considering Production Technology. *Journal of Cleaner Production* **2020**, *277*, doi:10.1016/j.jclepro.2020.123298.
1719. Prathviraj, M.P.; Samuel, A.; Narayan Prabhu, K. Reprocessed Waste Sunflower Cooking Oil as Quenchant for Heat Treatment. *Journal of Cleaner Production* **2020**, *269*, doi:10.1016/j.jclepro.2020.122276.
1720. Purohit, S.; Brooks, G.; Rhamdhani, M.A.; Pownceby, M.I. Evaluation of Concentrated Solar Thermal Energy for Iron Ore Agglomeration. *Journal of Cleaner Production* **2021**, *317*, doi:10.1016/j.jclepro.2021.128313.
1721. Qaidi, S.; Dinkha, Y.; Haido, J.; Ali, M.; Tayeh, B. Engineering Properties of Sustainable Green Concrete Incorporating Eco-Friendly Aggregate of Crumb Rubber: A Review. *Journal of Cleaner Production* **2021**, *324*, doi:10.1016/j.jclepro.2021.129251.
1722. Rahman, S.; Kim, J. Circular Economy, Proximity, and Shipbreaking: A Material Flow and Environmental Impact Analysis. *Journal of Cleaner Production* **2020**, *259*, doi:10.1016/j.jclepro.2020.120681.
1723. Rashid, A.R.M.; Bhuiyan, M.A.; Pramanik, B.; Jayasuriya, N. Life Cycle Assessment of Rainwater Harvesting System Components – To Determine Environmentally Sustainable Design. *Journal of Cleaner Production* **2021**, *326*, doi:10.1016/j.jclepro.2021.129286.
1724. Rashid, O.; Low, K.W.Q.; Pittman, J.F.T. Mold Cooling in Thermoplastics Injection Molding: Effectiveness and Energy Efficiency. *Journal of Cleaner Production* **2020**, *264*, doi:10.1016/j.jclepro.2020.121375.
1725. Ravuru, S.S.; Jana, A.; De, S. Cyanide Removal from Blast Furnace Effluent Using Layered Double Hydroxide Based Mixed Matrix Beads: Batch and Fixed Bed Study. *Journal of Cleaner Production* **2022**, *371*, doi:10.1016/j.jclepro.2022.133634.
1726. Ren, X.; Sancaktar, E. Use of Fly Ash as Eco-Friendly Filler in Synthetic Rubber for Tire Applications. *Journal of Cleaner Production* **2019**, *206*, 374–382, doi:10.1016/j.jclepro.2018.09.202.
1727. Rodriguez, R.L.; Lopes, J.C.; Garcia, M.V.; Fontequ Ribeiro, F.S.; Diniz, A.E.; Eduardo de Ângelo Sanchez, L.; José de Mello, H.; Roberto de Aguiar, P.; Bianchi, E.C. Application of Hybrid Eco-Friendly MQL+WCJ Technique in AISI 4340 Steel Grinding for Cleaner and Greener Production. *Journal of Cleaner Production* **2021**, *283*, doi:10.1016/j.jclepro.2020.124670.
1728. Sahu, A.K.; Padhy, R.K.; Das, D.; Gautam, A. Improving Financial and Environmental Performance through MFCA: A SME Case Study. *Journal of Cleaner Production* **2021**, *279*, doi:10.1016/j.jclepro.2020.123751.
1729. Sahu, S.N.; Meikap, B.C.; Biswal, S.K. Magnetization Roasting of Waste Iron Ore Beneficiation Plant Tailings Using Sawdust Biomass; A Novel Approach to Produce Metallurgical Grade Pellets. *Journal of Cleaner Production* **2022**, *343*, doi:10.1016/j.jclepro.2022.130894.

1730. Sarkkinen, M.; Kujala, K.; Gehör, S. Decision Support Framework for Solid Waste Management Based on Sustainability Criteria: A Case Study of Tailings Pond Cover Systems. *Journal of Cleaner Production* **2019**, *236*, doi:10.1016/j.jclepro.2019.07.058.
1731. Saxena, S.; Tembhurkar, A.R. Developing Biotechnological Technique for Reuse of Wastewater and Steel Slag in Bio-Concrete. *Journal of Cleaner Production* **2019**, *229*, 193–202, doi:10.1016/j.jclepro.2019.04.363.
1732. Schneider, C. Steel Manufacturing Clusters in a Hydrogen Economy – Simulation of Changes in Location and Vertical Integration of Steel Production in Northwestern Europe. *Journal of Cleaner Production* **2022**, *341*, doi:10.1016/j.jclepro.2022.130913.
1733. Schreiber, A.; Marx, J.; Zapp, P. Comparative Life Cycle Assessment of Electricity Generation by Different Wind Turbine Types. *Journal of Cleaner Production* **2019**, *233*, 561–572, doi:10.1016/j.jclepro.2019.06.058.
1734. Sepasgozar, S.; Frances Mair, D.; Tahmasebinia, F.; Shirowzhan, S.; Li, H.; Richter, A.; Yang, L.; Xu, S. Waste Management and Possible Directions of Utilising Digital Technologies in the Construction Context. *Journal of Cleaner Production* **2021**, *324*, doi:10.1016/j.jclepro.2021.129095.
1735. Shahjalal, M.; Islam, K.; Rahman, J.; Ahmed, K.S.; Karim, M.R.; Billah, A.M. Flexural Response of Fiber Reinforced Concrete Beams with Waste Tires Rubber and Recycled Aggregate. *Journal of Cleaner Production* **2021**, *278*, doi:10.1016/j.jclepro.2020.123842.
1736. Shen, J.; Zhang, Q.; Xu, L.; Tian, S.; Wang, P. Future CO<sub>2</sub> Emission Trends and Radical Decarbonization Path of Iron and Steel Industry in China. *Journal of Cleaner Production* **2021**, *326*, doi:10.1016/j.jclepro.2021.129354.
1737. Shi, S.; Huang, B.; Ren, F.; Duan, L.; Lei, J.; Wang, Y.; Wang, X.; Wu, Q.; Li, W.; Xiong, Y.; et al. Life Cycle Assessment of Embodied Human Health Effects of Building Materials in China. *Journal of Cleaner Production* **2022**, *350*, doi:10.1016/j.jclepro.2022.131484.
1738. Shu, K.; Sasaki, K. Occurrence of Steel Converter Slag and Its High Value-Added Conversion for Environmental Restoration in China: A Review. *Journal of Cleaner Production* **2022**, *373*, doi:10.1016/j.jclepro.2022.133876.
1739. Shukla, I. Potential of Renewable Agricultural Wastes in the Smart and Sustainable Steelmaking Process. *Journal of Cleaner Production* **2022**, *370*, doi:10.1016/j.jclepro.2022.133422.
1740. Siddique, R.; Singh, M.; Jain, M. Recycling Copper Slag in Steel Fibre Concrete for Sustainable Construction. *Journal of Cleaner Production* **2020**, *271*, doi:10.1016/j.jclepro.2020.122559.
1741. Sihag, N.; Sangwan, K. A Systematic Literature Review on Machine Tool Energy Consumption. *Journal of Cleaner Production* **2020**, *275*, doi:10.1016/j.jclepro.2020.123125.
1742. Silva, L.R.; Corrêa, E.C.S.; Brandão, J.R.; de Ávila, R.F. Environmentally Friendly



- Manufacturing: Behavior Analysis of Minimum Quantity of Lubricant - MQL in Grinding Process. *Journal of Cleaner Production* **2020**, *256*, doi:10.1016/j.jclepro.2013.01.033.
1743. Singh, R.P.; Singh, N.K.; Kazmi, A.A. Environmental Sustainability Assessment of a Fixed Media Based and Package Type Integrated Fixed-Film Activated Sludge Reactor in India: A Damage-Oriented Approach. *Journal of Cleaner Production* **2020**, *250*, doi:10.1016/j.jclepro.2019.119438.
1744. Sirirerkratana, K.; Kemacheevakul, P.; Chuangchote, S. Color Removal from Wastewater by Photocatalytic Process Using Titanium Dioxide-Coated Glass, Ceramic Tile, and Stainless Steel Sheets. *Journal of Cleaner Production* **2019**, *215*, 123–130, doi:10.1016/j.jclepro.2019.01.037.
1745. Song, D.; Kadier, A.; Peralta-Hernández, J.M.; Xie, H.; Hao, B.; Ma, P.-C. Separation of Oil-Water Emulsions by a Novel Packed Bed Electrocoagulation (EC) Process Using Anode from Recycled Aluminum Beverage Cans. *Journal of Cleaner Production* **2022**, *379*, doi:10.1016/j.jclepro.2022.134693.
1746. Song, J.; Wang, B.; Fang, K.; Yang, W. Unraveling Economic and Environmental Implications of Cutting Overcapacity of Industries: A City-Level Empirical Simulation with Input-Output Approach. *Journal of Cleaner Production* **2019**, *222*, 722–732, doi:10.1016/j.jclepro.2019.03.138.
1747. Song, L.; Dai, S.; Cao, Z.; Liu, Y.; Chen, W.-Q. High Spatial Resolution Mapping of Steel Resources Accumulated above Ground in Mainland China: Past Trends and Future Prospects. *Journal of Cleaner Production* **2021**, *297*, doi:10.1016/j.jclepro.2021.126482.
1748. Song, L.; Wang, P.; Hao, M.; Dai, M.; Xiang, K.; Li, N.; Chen, W.-Q. Mapping Provincial Steel Stocks and Flows in China: 1978–2050. *Journal of Cleaner Production* **2020**, *262*, doi:10.1016/j.jclepro.2020.121393.
1749. Souza Filho, I.R.; Springer, H.; Ma, Y.; Mahajan, A.; da Silva, C.C.; Kulse, M.; Raabe, D. Green Steel at Its Crossroads: Hybrid Hydrogen-Based Reduction of Iron Ores. *Journal of Cleaner Production* **2022**, *340*, doi:10.1016/j.jclepro.2022.130805.
1750. Stoiber, N.; Hammerl, M.; Kromoser, B. Cradle-to-Gate Life Cycle Assessment of CFRP Reinforcement for Concrete Structures: Calculation Basis and Exemplary Application. *Journal of Cleaner Production* **2021**, *280*, doi:10.1016/j.jclepro.2020.124300.
1751. Streitenberger, S.C.; Romão, E.L.; Paiva, A.P.; Balestrassi, P.P.; Freitas, J.H.G.; Paes, V.C. Normal Boundary Intersection with Factor Analysis Approach for Multiobjective Stochastic Optimization of a Cladding Process Focusing on Reduction of Energy Consumption and Rework. *Journal of Cleaner Production* **2022**, *333*, doi:10.1016/j.jclepro.2021.129915.
1752. Su, P.; Zhang, J.; Li, Y. Solidification/Stabilization of Stainless Steel Pickling Residue with Aluminum Potassium Sulfate Amended Fly Ash. *Journal of Cleaner Production* **2019**, *234*, 400–409, doi:10.1016/j.jclepro.2019.06.254.
1753. Suer, J.; Traverso, M.; Ahrenhold, F. Carbon Footprint of Scenarios towards

- Climate-Neutral Steel According to ISO 14067. *Journal of Cleaner Production* **2021**, *318*, doi:10.1016/j.jclepro.2021.128588.
1754. Sulaiman, M.F.; Chin, C.-L.; Ma, C.-K.; Awang, A.Z.; Omar, W. The Bond Strength of Reinforced Concrete with Confinement of Recycled Steel Strap. *Journal of Cleaner Production* **2022**, *369*, doi:10.1016/j.jclepro.2022.133352.
1755. Sun, W.; Zhou, Y.; Lv, J.; Wu, J. Assessment of Multi-Air Emissions: Case of Particulate Matter (Dust), SO<sub>2</sub>, NO<sub>x</sub> and CO<sub>2</sub> from Iron and Steel Industry of China. *Journal of Cleaner Production* **2019**, *232*, 350–358, doi:10.1016/j.jclepro.2019.05.400.
1756. Sun, X.; Meng, F.; Liu, J.; McKechnie, J.; Yang, J. Life Cycle Energy Use and Greenhouse Gas Emission of Lightweight Vehicle – A Body-in-White Design. *Journal of Cleaner Production* **2019**, *220*, 1–8, doi:10.1016/j.jclepro.2019.01.225.
1757. Sun, Y.; Wang, Y.; Zheng, H.; Zhang, Z.; Wang, Y.; Li, H.; Lu, Y. Critical Supply Chains of NO<sub>x</sub> Emissions in the Beijing-Tianjin-Hebei Urban Agglomeration. *Journal of Cleaner Production* **2022**, *362*, doi:10.1016/j.jclepro.2022.132379.
1758. Taji, I.; Ghorbani, S.; de Brito, J.; Tam, V.W.Y.; Sharifi, S.; Davoodi, A.; Tavakkolizadeh, M. Application of Statistical Analysis to Evaluate the Corrosion Resistance of Steel Rebars Embedded in Concrete with Marble and Granite Waste Dust. *Journal of Cleaner Production* **2019**, *210*, 837–846, doi:10.1016/j.jclepro.2018.11.091.
1759. Tan, X.; Li, H.; Guo, J.; Gu, B.; Zeng, Y. Energy-Saving and Emission-Reduction Technology Selection and CO<sub>2</sub> Emission Reduction Potential of China's Iron and Steel Industry under Energy Substitution Policy. *Journal of Cleaner Production* **2019**, *222*, 823–834, doi:10.1016/j.jclepro.2019.03.133.
1760. Tang, Z.; Zhang, Q.; Sun, Y.; Gao, P.; Han, Y. Prospects of Green Extraction of Iron from Waste Dumped Flotation Tailings by H<sub>2</sub>: A Pilot Case Study. *Journal of Cleaner Production* **2022**, *330*, doi:10.1016/j.jclepro.2021.129853.
1761. Tavares, V.; Lacerda, N.; Freire, F. Embodied Energy and Greenhouse Gas Emissions Analysis of a Prefabricated Modular House: The “Moby” Case Study. *Journal of Cleaner Production* **2019**, *212*, 1044–1053, doi:10.1016/j.jclepro.2018.12.028.
1762. Teng, Y.; Pan, W. Systematic Embodied Carbon Assessment and Reduction of Prefabricated High-Rise Public Residential Buildings in Hong Kong. *Journal of Cleaner Production* **2019**, *238*, doi:10.1016/j.jclepro.2019.117791.
1763. Teo, P.T.; Anasyida, A.S.; Kho, C.M.; Nurulakmal, M.S. Recycling of Malaysia's EAF Steel Slag Waste as Novel Fluxing Agent in Green Ceramic Tile Production: Sintering Mechanism and Leaching Assessment. *Journal of Cleaner Production* **2019**, *241*, doi:10.1016/j.jclepro.2019.118144.
1764. Teubler, J.; Weber, S.; Suski, P.; Peschke, I.; Liedtke, C. Critical Evaluation of the Material Characteristics and Environmental Potential of Laser Beam Melting Processes for the Additive Manufacturing of Metallic Components. *Journal of Cleaner Production* **2019**, *237*, doi:10.1016/j.jclepro.2019.117775.
1765. Tian, B.; Wei, G.; Li, X.; Zhu, R.; Bai, H.; Tian, W.; Dong, K. Effect of Hot Metal

- Charging on Economic and Environmental Indices of Electric Arc Furnace Steelmaking in China. *Journal of Cleaner Production* **2022**, *379*, doi:10.1016/j.jclepro.2022.134597.
1766. Tian, W.; An, H.; Li, X.; Li, H.; Quan, K.; Lu, X.; Bai, H. CO<sub>2</sub> Accounting Model and Carbon Reduction Analysis of Iron and Steel Plants Based on Intra- and Inter-Process Carbon Metabolism. *Journal of Cleaner Production* **2022**, *360*, doi:10.1016/j.jclepro.2022.132190.
1767. Tirado González, J.G.; Reyes Segura, B.T.; Esguerra-Arce, J.; Bermúdez Castañeda, A.; Aguilar, Y.; Esguerra-Arce, A. An Innovative Magnetic Oxide Dispersion-Strengthened Iron Compound Obtained from an Industrial Byproduct, with a View to Circular Economy. *Journal of Cleaner Production* **2020**, *268*, doi:10.1016/j.jclepro.2020.122362.
1768. Tong, Y.; Cai, J.; Zhang, Q.; Gao, C.; Wang, L.; Li, P.; Hu, S.; Liu, C.; He, Z.; Yang, J. Life Cycle Water Use and Wastewater Discharge of Steel Production Based on Material-Energy-Water Flows: A Case Study in China. *Journal of Cleaner Production* **2019**, *241*, doi:10.1016/j.jclepro.2019.118410.
1769. Towa, E.; Zeller, V.; Achten, W. Input-Output Models and Waste Management Analysis: A Critical Review. *Journal of Cleaner Production* **2020**, *249*, doi:10.1016/j.jclepro.2019.119359.
1770. Trinh, H.T.M.K.; Chowdhury, S.; Nguyen, M.T.; Liu, T. Optimising Flat Plate Buildings Based on Carbon Footprint Using Branch-and-Reduce Deterministic Algorithm. *Journal of Cleaner Production* **2021**, *320*, doi:10.1016/j.jclepro.2021.128780.
1771. Tsalidis, G.A.; Tourkodimitri, K.P.; Mitko, K.; Gzyl, G.; Skalny, A.; Posada, J.A.; Xevgenos, D. Assessing the Environmental Performance of a Novel Coal Mine Brine Treatment Technique: A Case in Poland. *Journal of Cleaner Production* **2022**, *358*, doi:10.1016/j.jclepro.2022.131973.
1772. Tseng, H.-H.; Lin, Z.-Y.; Chen, S.-H.; Lai, W.-H.; Wey, M.-Y. Reuse of Reclaimed Tire Rubber for Gas-Separation Membranes Prepared by Hot-Pressing. *Journal of Cleaner Production* **2019**, *237*, doi:10.1016/j.jclepro.2019.117739.
1773. Tuovinen, T.; Tynjälä, P.; Vielma, T.; Lassi, U. Utilization of Waste Sodium Sulfate from Battery Chemical Production in Neutral Electrolytic Pickling. *Journal of Cleaner Production* **2021**, *324*, doi:10.1016/j.jclepro.2021.129237.
1774. Türe, Y.; Türe, C. An Assessment of Using Aluminum and Magnesium on CO<sub>2</sub> Emission in European Passenger Cars. *Journal of Cleaner Production* **2020**, *247*, doi:10.1016/j.jclepro.2019.119120.
1775. Turgut, O.; Bjerketvedt, V.S.; Tomasgard, A.; Roussanaly, S. An Integrated Analysis of Carbon Capture and Storage Strategies for Power and Industry in Europe. *Journal of Cleaner Production* **2021**, *329*, doi:10.1016/j.jclepro.2021.129427.
1776. Ul Islam, M.; Li, J.; Roychand, R.; Saberian, M.; Chen, F. A Comprehensive Review on the Application of Renewable Waste Tire Rubbers and Fibers in Sustainable Concrete. *Journal of Cleaner Production* **2022**, *374*, doi:10.1016/j.jclepro.2022.133998.

1777. Venkrbec, V.; Klansek, U. Suitability of Recycled Concrete Aggregates from Precast Panel Buildings Deconstructed at Expired Lifespan for Structural Use. *Journal of Cleaner Production* **2020**, *247*, doi:10.1016/j.jclepro.2019.119593.
1778. Vukelic, D.; Simunovic, K.; Simunovic, G.; Saric, T.; Kanovic, Z.; Budak, I.; Agarski, B. Evaluation of an Environment-Friendly Turning Process of Inconel 601 in Dry Conditions. *Journal of Cleaner Production* **2020**, *266*, doi:10.1016/j.jclepro.2020.121919.
1779. Wan, J.; Wu, S.; Xiao, Y.; Fang, M.; Song, W.; Pan, P.; Zhang, D. Enhanced Ice and Snow Melting Efficiency of Steel Slag Based Ultra-Thin Friction Courses with Steel Fiber. *Journal of Cleaner Production* **2019**, *236*, doi:10.1016/j.jclepro.2019.117613.
1780. Wang, F.; Hoff, I.; Yang, F.; Wu, S.; Xie, J.; Li, N.; Zhang, L. Comparative Assessments for Environmental Impacts from Three Advanced Asphalt Pavement Construction Cases. *Journal of Cleaner Production* **2021**, *297*, doi:10.1016/j.jclepro.2021.126659.
1781. Wang, J.; Guo, Z.; Zhang, P.; Yuan, Q.; Guan, Q. Fracture Properties of Rubberized Concrete under Different Temperature and Humidity Conditions Based on Digital Image Correlation Technique. *Journal of Cleaner Production* **2020**, *276*, doi:10.1016/j.jclepro.2020.124106.
1782. Wang, J.; Zhang, P.; Wang, S.; Yang, L.; Luo, J.; He, W.; Du, G.; Wang, X.; Zhang, Z.; Yang, X. Evaluation of a Green-Sustainable Industrialized Cleaner Production for FeV50 and FeV80 Alloys from Vanadium Slag by Calcification Roasting-Ammonia on-Line Cycle. *Journal of Cleaner Production* **2021**, *320*, doi:10.1016/j.jclepro.2021.128896.
1783. Wang, J.; Zhang, Y.; Cui, K.; Fu, T.; Gao, J.; Hussain, S.; AlGarni, T. Pyrometallurgical Recovery of Zinc and Valuable Metals from Electric Arc Furnace Dust - A Review. *Journal of Cleaner Production* **2021**, *298*, doi:10.1016/j.jclepro.2021.126788.
1784. Wang, J.; Chang, L.; Yue, D.; Zhou, Y.; Liu, H.; Wang, Y.; Yang, S.; Cui, S. Effect of Chelating Solubilization via Different Alkanolamines on the Dissolution Properties of Steel Slag. *Journal of Cleaner Production* **2022**, *365*, doi:10.1016/j.jclepro.2022.132824.
1785. Wang, J.; Dai, Q.; Si, R.; Ma, Y.; Guo, S. Fresh and Mechanical Performance and Freeze-Thaw Durability of Steel Fiber-Reinforced Rubber Self-Compacting Concrete (SRSCC). *Journal of Cleaner Production* **2020**, *277*, doi:10.1016/j.jclepro.2020.123180.
1786. Wang, J.; Wang, Z.; Zhang, Z.; Zhang, G. Removal of Zinc from Basic Oxygen Steelmaking Filter Cake by Selective Leaching with Butyric Acid. *Journal of Cleaner Production* **2019**, *209*, 1–9, doi:10.1016/j.jclepro.2018.10.253.
1787. Wang, R.R.; Zhao, Y.Q.; Babich, A.; Senk, D.; Fan, X.Y. Hydrogen Direct Reduction (H-DR) in Steel Industry—An Overview of Challenges and Opportunities. *Journal of Cleaner Production* **2021**, *329*, doi:10.1016/j.jclepro.2021.129797.
1788. Wang, S.; Lu, C.; Gao, Y.; Wang, K.; Zhang, R. Life Cycle Assessment of Reduction

- of Environmental Impacts via Industrial Symbiosis in an Energy-Intensive Industrial Park in China. *Journal of Cleaner Production* **2019**, *241*, doi:10.1016/j.jclepro.2019.118358.
1789. Wang, X.; Zhang, Q.; Xu, L.; Tong, Y.; Jia, X.; Tian, H. Water-Energy-Carbon Nexus Assessment of China's Iron and Steel Industry: Case Study from Plant Level. *Journal of Cleaner Production* **2020**, *253*, doi:10.1016/j.jclepro.2019.119910.
1790. Wang, X.; Zhang, Z.; Li, J.; Wang, W.; Mao, Y.; Song, Z. Quantification of CO<sub>2</sub> Emission from the Preparation and Utilization of Solid Waste-Based Sulphoaluminate Cementitious Materials. *Journal of Cleaner Production* **2022**, *376*, doi:10.1016/j.jclepro.2022.134054.
1791. Wang, Y.; Li, D.; Liu, X.; Zhang, W.; Li, Z.; Li, Y.; Ren, Y.; Li, H. Mechanism of Magnetizing the Bayer Red Mud and Meanwhile Improving the Cementitious Activity of Its Tailings by Using Biomass. *Journal of Cleaner Production* **2021**, *287*, doi:10.1016/j.jclepro.2020.125016.
1792. Wang, Y.; Zhang, J.; Liu, Z.; Du, C.; Schenk, J.; Shao, J.; Zhang, Y. Co-Utilization of Converter Sludge-Containing Dedust Wastewater in Iron Ore Sintering to Save Fresh Water, Enhance Quality and Reduce Pollution. *Journal of Cleaner Production* **2019**, *234*, 157–170, doi:10.1016/j.jclepro.2019.06.186.
1793. Wang, Z.; Zhang, T.; Yu, T.; Zhao, J. Assessment and Optimization of Grinding Process on AISI 1045 Steel in Terms of Green Manufacturing Using Orthogonal Experimental Design and Grey Relational Analysis. *Journal of Cleaner Production* **2020**, *253*, doi:10.1016/j.jclepro.2019.119896.
1794. Wegmann, S.; Rytka, C.; Diaz-Rodenas, M.; Werlen, V.; Schneeberger, C.; Ermanni, P.; Caglar, B.; Gomez, C.; Michaud, V. A Life Cycle Analysis of Novel Lightweight Composite Processes: Reducing the Environmental Footprint of Automotive Structures. *Journal of Cleaner Production* **2022**, *330*, doi:10.1016/j.jclepro.2021.129808.
1795. Wei, N.; Liu, S.; Jiao, Z.; Li, X.-C. A Possible Contribution of Carbon Capture, Geological Utilization, and Storage in the Chinese Crude Steel Industry for Carbon Neutrality. *Journal of Cleaner Production* **2022**, *374*, doi:10.1016/j.jclepro.2022.133793.
1796. Wu, F.; Yu, Q.; Gauvin, F.; Brouwers, H.J.H.; Liu, C. Phosphorus Removal from Aqueous Solutions by Adsorptive Concrete Aggregates. *Journal of Cleaner Production* **2021**, *278*, doi:10.1016/j.jclepro.2020.123933.
1797. Wu, J.; Lu, J. The Synergetic Effect of Reducing Pollutants and Carbon Quantified by Exergy Flow Integrated Resources and Energy in an Iron and Steel Symbiosis Network. *Journal of Cleaner Production* **2022**, *340*, doi:10.1016/j.jclepro.2022.130807.
1798. Wu, J.; Lu, J.; Jin, R. Quantitative Indicators for Evolution of a Typical Iron and Steel Industrial Symbiosis Network. *Journal of Cleaner Production* **2021**, *287*, doi:10.1016/j.jclepro.2020.125491.
1799. Wu, J.; Jin, R. Exploring the Impact of Symbiotic Measures on the Evolution of Structure and Function of the Iron and Steel Industrial Symbiosis Network. *Journal*

- of Cleaner Production **2020**, 273, doi:10.1016/j.jclepro.2020.122990.
1800. Wu, M.-T.; Li, Y.-L.; Guo, Q.; Shao, D.-W.; He, M.-M.; Qi, T. Harmless Treatment and Resource Utilization of Stainless Steel Pickling Sludge via Direct Reduction and Magnetic Separation. *Journal of Cleaner Production* **2019**, 240, doi:10.1016/j.jclepro.2019.118187.
1801. Wu, R.; Xiao, Y.; Zhang, P.; Lin, J.; Cheng, G.; Chen, Z.; Yu, R. Asphalt VOCs Reduction of Zeolite Synthesized from Solid Wastes of Red Mud and Steel Slag. *Journal of Cleaner Production* **2022**, 345, doi:10.1016/j.jclepro.2022.131078.
1802. Wu, S.; Sun, T.; Kou, J. A Novel and Clean Utilization of Converter Sludge by Co-Reduction Roasting with High-Phosphorus Iron Ore to Produce Powdery Reduced Iron. *Journal of Cleaner Production* **2022**, 363, doi:10.1016/j.jclepro.2022.132362.
1803. Wu, T.; Ng, S.; Chen, J. Deciphering the CO<sub>2</sub> Emissions and Emission Intensity of Cement Sector in China through Decomposition Analysis. *Journal of Cleaner Production* **2022**, 352, doi:10.1016/j.jclepro.2022.131627.
1804. Wu, W.; Zhu, R.; Wei, G.; Dong, K.; Jiang, J.; Chen, B. Modeling on the Blast Furnace with CO<sub>2</sub>-Enriched Hot Blast. *Journal of Cleaner Production* **2021**, 319, doi:10.1016/j.jclepro.2021.128690.
1805. Xia, C.; Wu, Y.; Qiu, Y.; Cai, L.; Smith, L.M.; Tu, M.; Zhao, W.; Shao, D.; Mei, C.; Nie, X.; et al. Processing High-Performance Woody Materials by Means of Vacuum-Assisted Resin Infusion Technology. *Journal of Cleaner Production* **2019**, 241, doi:10.1016/j.jclepro.2019.118340.
1806. Xiao, J.; Guo, J.; Zhan, L.; Xu, Z. A Cleaner Approach to the Discharge Process of Spent Lithium Ion Batteries in Different Solutions. *Journal of Cleaner Production* **2020**, 255, doi:10.1016/j.jclepro.2020.120064.
1807. Xie, J.-B.; Fu, J.-X.; Liu, S.-Y.; Hwang, W.-S. Assessments of Carbon Footprint and Energy Analysis of Three Wind Farms. *Journal of Cleaner Production* **2020**, 254, doi:10.1016/j.jclepro.2020.120159.
1808. Xu, C.-L. Surface Modification to Fabricate Dual Superlyophobic Mesh for Efficient Oil/Water Separation. *Journal of Cleaner Production* **2020**, 273, doi:10.1016/j.jclepro.2020.122872.
1809. Xu, D.; Ni, W.; Wang, Q.; Xu, C.; Li, K. Ammonia-Soda Residue and Metallurgical Slags from Iron and Steel Industries as Cementitious Materials for Clinker-Free Concretes. *Journal of Cleaner Production* **2021**, 307, doi:10.1016/j.jclepro.2021.127262.
1810. Xu, F.; Cui, F.; Xiang, N. Roadmap of Green Transformation for a Steel-Manufacturing Intensive City in China Driven by Air Pollution Control. *Journal of Cleaner Production* **2021**, 283, doi:10.1016/j.jclepro.2020.124643.
1811. Xu, J.; Guo, C.; Chen, X.; Zhang, Z.; Yang, L.; Wang, M.; Yang, K. Emission Transition of Greenhouse Gases with the Surrounding Rock Weakened – A Case Study of Tunnel Construction. *Journal of Cleaner Production* **2019**, 209, 169–179, doi:10.1016/j.jclepro.2018.10.224.
1812. Xu, J.; Huang, Y.; Shi, Y.; Deng, Y. Supply Chain Management Approach for

- Greenhouse and Acidifying Gases Emission Reduction towards Construction Materials Industry: A Case Study from China. *Journal of Cleaner Production* **2020**, *258*, doi:10.1016/j.jclepro.2020.120521.
1813. Xu, X.; Liu, S.; Smith, K.; Cui, Y.; Wang, Z. An Overview on Corrosion of Iron and Steel Components in Reclaimed Water Supply Systems and the Mechanisms Involved. *Journal of Cleaner Production* **2020**, *276*, doi:10.1016/j.jclepro.2020.124079.
1814. Xu, Z.; Zheng, Z.; Gao, X.; Shen, X. Reducing the Fluctuation of Oxygen Demand in a Steel Plant through Optimal Production Scheduling. *Journal of Cleaner Production* **2021**, *282*, doi:10.1016/j.jclepro.2020.124529.
1815. Xue, R.; Wang, S.; Gao, G.; Liu, D.; Long, W.; Zhang, R. Evaluation of Symbiotic Technology-Based Energy Conservation and Emission Reduction Benefits in Iron and Steel Industry: Case Study of Henan, China. *Journal of Cleaner Production* **2022**, *338*, doi:10.1016/j.jclepro.2022.130616.
1816. Yanan, M.; Jianlin, S.; Jiaqi, H.; Xudong, Y.; Yu, P. Recycling Prospect and Sustainable Lubrication Mechanism of Water-Based MoS<sub>2</sub> Nano-Lubricant for Steel Cold Rolling Process. *Journal of Cleaner Production* **2020**, *277*, doi:10.1016/j.jclepro.2020.123991.
1817. Yang, C.; Wu, S.; Cui, P.; Amirkhanian, S.; Zhao, Z.; Wang, F.; Zhang, L.; Wei, M.; Zhou, X.; Xie, J. Performance Characterization and Enhancement Mechanism of Recycled Asphalt Mixtures Involving High RAP Content and Steel Slag. *Journal of Cleaner Production* **2022**, *336*, doi:10.1016/j.jclepro.2022.130484.
1818. Yang, C.; Wu, S.; Xie, J.; Amirkhanian, S.; Liu, Q.; Zhang, J.; Xiao, Y.; Zhao, Z.; Xu, H.; Li, N.; et al. Enhanced Induction Heating and Self-Healing Performance of Recycled Asphalt Mixtures by Incorporating Steel Slag. *Journal of Cleaner Production* **2022**, *366*, doi:10.1016/j.jclepro.2022.132999.
1819. Yang, C.; Zhang, L.; Chen, Z.; Gao, Y.; Xu, Z. Dynamic Material Flow Analysis of Aluminum from Automobiles in China during 2000-2050 for Standardized Recycling Management. *Journal of Cleaner Production* **2022**, *337*, doi:10.1016/j.jclepro.2022.130544.
1820. Yang, Y.; Hu, M.; Li, Y.; Wen, L.; Hu, M.; Hu, L. Research on the Reduction of Iron Ore in the Process of Closed Recycle of Vent Gas. *Journal of Cleaner Production* **2020**, *268*, doi:10.1016/j.jclepro.2020.121951.
1821. Yang, Y.; Tong, L.; Yin, S.; Liu, Y.; Wang, L.; Qiu, Y.; Ding, Y. Status and Challenges of Applications and Industry Chain Technologies of Hydrogen in the Context of Carbon Neutrality. *Journal of Cleaner Production* **2022**, *376*, doi:10.1016/j.jclepro.2022.134347.
1822. Yao, X.; Yuan, X.; Yu, S.; Lei, M. Economic Feasibility Analysis of Carbon Capture Technology in Steelworks Based on System Dynamics. *Journal of Cleaner Production* **2021**, *322*, doi:10.1016/j.jclepro.2021.129046.
1823. Yi, H.; Zhong, T.; Liu, J.; Yu, Q.; Zhao, S.; Gao, F.; Zhou, Y.; Wang, S.; Tang, X. Emissions of Air Pollutants from Sintering Flue Gas in the Beijing-Tianjin-Hebei Area and Proposed Reduction Measures. *Journal of Cleaner Production* **2021**, *304*,

- doi:10.1016/j.jclepro.2021.126958.
1824. Yi, X.; Lu, Y.; He, G.; Li, H.; Chen, C.; Cui, H. Global Carbon Transfer and Emissions of Aluminum Production and Consumption. *Journal of Cleaner Production* **2022**, *362*, doi:10.1016/j.jclepro.2022.132513.
1825. Yoon, S.; Choi, M.; Hwang, Y.; Bae, S. Upcycling of Steel Slag for Manufacture of Prussian-Blue-Encapsulated Pectin Beads and Its Use for Efficient Removal of Aqueous Cesium. *Journal of Cleaner Production* **2021**, *319*, doi:10.1016/j.jclepro.2021.128786.
1826. Yu, J.; Yang, J.; Jiang, Z.; Zhang, H.; Wang, Y. Emergy Based Sustainability Evaluation of Spent Lead Acid Batteries Recycling. *Journal of Cleaner Production* **2020**, *250*, doi:10.1016/j.jclepro.2019.119467.
1827. Yue, H.; Worrell, E.; Crijns-Graus, W.; Zhang, S. The Potential of Industrial Electricity Savings to Reduce Air Pollution from Coal-Fired Power Generation in China. *Journal of Cleaner Production* **2021**, *301*, doi:10.1016/j.jclepro.2021.126978.
1828. Zanghelini, G.M.; Cherubini, E.; Dias, R.; Kabe, Y.H.O.; Delgado, J.J.S. Comparative Life Cycle Assessment of Drinking Straws in Brazil. *Journal of Cleaner Production* **2020**, *276*, doi:10.1016/j.jclepro.2020.123070.
1829. Zhai, Q.; Li, T.; Liu, Y. Life Cycle Assessment of a Wave Energy Converter: Uncertainties and Sensitivities. *Journal of Cleaner Production* **2021**, *298*, doi:10.1016/j.jclepro.2021.126719.
1830. Zhan, P.-M.; Zhang, X.-X.; He, Z.-H.; Shi, J.-Y.; Gencel, O.; Hai Yen, N.T.; Wang, G.-C. Strength, Microstructure and Nanomechanical Properties of Recycled Aggregate Concrete Containing Waste Glass Powder and Steel Slag Powder. *Journal of Cleaner Production* **2022**, *341*, doi:10.1016/j.jclepro.2022.130892.
1831. Zhang, C.; Hu, M.; Sprecher, B.; Yang, X.; Zhong, X.; Li, C.; Tukker, A. Recycling Potential in Building Energy Renovation: A Prospective Study of the Dutch Residential Building Stock up to 2050. *Journal of Cleaner Production* **2021**, *301*, doi:10.1016/j.jclepro.2021.126835.
1832. Zhang, C.; Zhang, X. Climate Responsibility Optimization Model for the Cooperative Game between Steel Sector and Consumer Side in China. *Journal of Cleaner Production* **2022**, *370*, doi:10.1016/j.jclepro.2022.133592.
1833. Zhang, D.; Ling, H.; Yang, T.; Liu, W.; Chen, L. Selective Leaching of Zinc from Electric Arc Furnace Dust by a Hydrothermal Reduction Method in a Sodium Hydroxide System. *Journal of Cleaner Production* **2019**, *224*, 536–544, doi:10.1016/j.jclepro.2019.03.149.
1834. Zhang, J.; Li, S.; Li, Z. Investigation the Synergistic Effects in Quaternary Binder Containing Red Mud, Blast Furnace Slag, Steel Slag and Flue Gas Desulfurization Gypsum Based on Artificial Neural Networks. *Journal of Cleaner Production* **2020**, *273*, doi:10.1016/j.jclepro.2020.122972.
1835. Zhang, P.; Wang, K.; Li, Q.; Wang, J.; Ling, Y. Fabrication and Engineering Properties of Concretes Based on Geopolymers/Alkali-Activated Binders - A Review. *Journal of Cleaner Production* **2020**, *258*, doi:10.1016/j.jclepro.2020.120896.



1836. Zhang, R.; Ma, X.; Shen, X.; Zhai, Y.; Zhang, T.; Ji, C.; Hong, J. Life Cycle Assessment of Electrolytic Manganese Metal Production. *Journal of Cleaner Production* **2020**, *253*, doi:10.1016/j.jclepro.2019.119951.
1837. Zhang, S.; Ghoulah, Z.; Mucci, A.; Bahn, O.; Provençal, R.; Shao, Y. Production of Cleaner High-Strength Cementing Material Using Steel Slag under Elevated-Temperature Carbonation. *Journal of Cleaner Production* **2022**, *342*, doi:10.1016/j.jclepro.2022.130948.
1838. Zhang, S.; Yi, B.; Guo, F.; Zhu, P. Exploring Selected Pathways to Low and Zero CO<sub>2</sub> Emissions in China's Iron and Steel Industry and Their Impacts on Resources and Energy. *Journal of Cleaner Production* **2022**, *340*, doi:10.1016/j.jclepro.2022.130813.
1839. Zhang, S.; Yi, B.-W.; Worrell, E.; Wagner, F.; Crijns-Graus, W.; Purohit, P.; Wada, Y.; Varis, O. Integrated Assessment of Resource-Energy-Environment Nexus in China's Iron and Steel Industry. *Journal of Cleaner Production* **2019**, *232*, 235–249, doi:10.1016/j.jclepro.2019.05.392.
1840. Zhang, X.; Chen, Y.; Jiang, P.; Liu, L.; Xu, X.; Xu, Y. Sectoral Peak CO<sub>2</sub> Emission Measurements and a Long-Term Alternative CO<sub>2</sub> Mitigation Roadmap: A Case Study of Yunnan, China. *Journal of Cleaner Production* **2020**, *247*, doi:10.1016/j.jclepro.2019.119171.
1841. Zhang, X.; Jiao, K.; Zhang, J.; Guo, Z. A Review on Low Carbon Emissions Projects of Steel Industry in the World. *Journal of Cleaner Production* **2021**, *306*, doi:10.1016/j.jclepro.2021.127259.
1842. Zhang, X.; Zhang, X. Comparison and Sensitivity Analysis of Embodied Carbon Emissions and Costs Associated with Rural House Construction in China to Identify Sustainable Structural Forms. *Journal of Cleaner Production* **2021**, *293*, doi:10.1016/j.jclepro.2021.126190.
1843. Zhang, Y.; Hu, S.; Guo, F.; Mastrucci, A.; Zhang, S.; Yang, Z.; Yan, D. Assessing the Potential of Decarbonizing China's Building Construction by 2060 and Synergy with Industry Sector. *Journal of Cleaner Production* **2022**, *359*, doi:10.1016/j.jclepro.2022.132086.
1844. Zhang, Y.; Gu, L.; Guo, X. Carbon Audit Evaluation System and Its Application in the Iron and Steel Enterprises in China. *Journal of Cleaner Production* **2020**, *248*, doi:10.1016/j.jclepro.2019.119204.
1845. Zhang, Y.; Li, Y.; Sun, Z.; Xiong, H.; Qin, R.; Li, C. Cost-Imbalanced Hyper Parameter Learning Framework for Quality Classification. *Journal of Cleaner Production* **2020**, *242*, doi:10.1016/j.jclepro.2019.118481.
1846. Zhang, Y.; Song, Y. Environmental Regulations, Energy and Environment Efficiency of China's Metal Industries: A Provincial Panel Data Analysis. *Journal of Cleaner Production* **2021**, *280*, doi:10.1016/j.jclepro.2020.124437.
1847. Zhao, D.; Zhang, B.; Shen, W.; Wu, M.; Guan, Y.; Wu, J.; Zhang, Z.; Zhu, J. High Industrial Solid Waste Road Base Course Binder: Performance Regulation, Hydration Characteristics and Practical Application. *Journal of Cleaner Production*

- 2021, 313, doi:10.1016/j.jclepro.2021.127879.
1848. Zhao, D.; Zhang, D.; Shen, W.; Huang, J.; Tang, X.; Yang, Y.; Deng, Y.; Wang, Y. Investigation on Industrial Trial Production of Multi-Phased Clinker with Crude Granular Steel Slag. *Journal of Cleaner Production* **2022**, 337, doi:10.1016/j.jclepro.2022.130467.
1849. Zhao, H.; Song, S.; Zhang, Y.; Liao, Y.; Yue, F. Optimal Decisions in Supply Chains with a Call Option Contract under the Carbon Emissions Tax Regulation. *Journal of Cleaner Production* **2020**, 271, doi:10.1016/j.jclepro.2020.122199.
1850. Zhong, H.; Poon, E.W.; Chen, K.; Zhang, M. Engineering Properties of Crumb Rubber Alkali-Activated Mortar Reinforced with Recycled Steel Fibres. *Journal of Cleaner Production* **2019**, 238, doi:10.1016/j.jclepro.2019.117950.
1851. Zhong, H.; Zhang, M. Experimental Study on Engineering Properties of Concrete Reinforced with Hybrid Recycled Tyre Steel and Polypropylene Fibres. *Journal of Cleaner Production* **2020**, 259, doi:10.1016/j.jclepro.2020.120914.
1852. Zhou, G.; Zhang, C.; Lu, F.; Zhang, J. Integrated Optimization of Cutting Parameters and Tool Path for Cavity Milling Considering Carbon Emissions. *Journal of Cleaner Production* **2020**, 250, doi:10.1016/j.jclepro.2019.119454.
1853. Zhou, S.; Li, Y.; Liao, X.; Wang, W.; Mao, C.; Mi, J.; Wu, Y.; Wang, Y. A Low-Cost Deodorizing Spray Net Device for the Removal of Ammonia Emissions in Livestock Houses. *Journal of Cleaner Production* **2021**, 318, doi:10.1016/j.jclepro.2021.128516.
1854. Zhou, Y.; Lu, J.; Li, J.; Cheeseman, C.; Poon, C.S. Effect of NaCl and MgCl<sub>2</sub> on the Hydration of Lime-Pozzolan Blend by Recycling Sewage Sludge Ash. *Journal of Cleaner Production* **2021**, 313, doi:10.1016/j.jclepro.2021.127759.
1855. Zhu, S.; Gao, C.; Gao, C.; Guo, Y.; Zhang, X.; Li, X. Exploration of a New Path to Reduce Air Pollutant Emissions in the Sinter Plant of Steelworks. *Journal of Cleaner Production* **2022**, 373, doi:10.1016/j.jclepro.2022.133831.
1856. Zhu, S.; Li, T.; Wu, Y.; Chen, Y.; Su, T.; Ri, K.; Huo, Y. Effective Purification of Cold-Rolling Sludge as Iron Concentrate Powder via a Coupled Hydrothermal and Calcination Route: From Laboratory-Scale to Pilot-Scale. *Journal of Cleaner Production* **2020**, 276, doi:10.1016/j.jclepro.2020.124274.
1857. Zhu, W.; Feng, W.; Li, X.; Zhang, Z. Analysis of the Embodied Carbon Dioxide in the Building Sector: A Case of China. *Journal of Cleaner Production* **2020**, 269, doi:10.1016/j.jclepro.2020.122438.
1858. Zhu, X.; Han, Y.; Sun, Y.; Li, Y.; Wang, H. Siderite as a Novel Reductant for Clean Utilization of Refractory Iron Ore. *Journal of Cleaner Production* **2020**, 245, doi:10.1016/j.jclepro.2019.118704.
1859. Zhu, Y.; Zhang, F.; Jia, S. Embodied Energy and Carbon Emissions Analysis of Geosynthetic Reinforced Soil Structures. *Journal of Cleaner Production* **2022**, 370, doi:10.1016/j.jclepro.2022.133510.
1860. Zong, S.; Liu, Z.; Li, S.; Lu, Y.; Zheng, A. Stress-Strain Behaviour of Steel-Fibre-Reinforced Recycled Aggregate Concrete under Axial Tension. *Journal of Cleaner*

- Production* **2021**, 278, doi:10.1016/j.jclepro.2020.123248.
1861. Zubail, A.; Traidia, A.; Masulli, M.; Vatopoulos, K.; Villette, T.; Taie, I. Carbon and Energy Footprint of Nonmetallic Composite Pipes in Onshore Oil and Gas Flowlines. *Journal of Cleaner Production* **2021**, 305, doi:10.1016/j.jclepro.2021.127150.
1862. Bailera, M.; Lisbona, P.; Peña, B.; Romeo, L.M. A Review on CO<sub>2</sub> mitigation in the Iron and Steel Industry through Power to X Processes. *Journal of CO<sub>2</sub> Utilization* **2021**, 46, doi:10.1016/j.jcou.2021.101456.
1863. Chen, Z.; Cang, Z.; Yang, F.; Zhang, J.; Zhang, L. Carbonation of Steelmaking Slag Presents an Opportunity for Carbon Neutral: A Review. *Journal of CO<sub>2</sub> Utilization* **2021**, 54, doi:10.1016/j.jcou.2021.101738.
1864. Dey, G.R.; Kamble, S. Effects of Electrode Material and Frequency on Carbon Monoxide Formation in Carbon Dioxide Dielectric Barrier Discharge. *Journal of CO<sub>2</sub> Utilization* **2020**, 40, doi:10.1016/j.jcou.2020.101207.
1865. Gentile, G.; Bonalumi, D.; Pieterse, J.A.Z.; Sebastiani, F.; Lucking, L.; Manzolini, G. Techno-Economic Assessment of the FReSMe Technology for CO<sub>2</sub> Emissions Mitigation and Methanol Production from Steel Plants. *Journal of CO<sub>2</sub> Utilization* **2022**, 56, doi:10.1016/j.jcou.2021.101852.
1866. Lee, J.; Ryu, K.H.; Ha, H.Y.; Jung, K.-D.; Lee, J.H. Techno-Economic and Environmental Evaluation of Nano Calcium Carbonate Production Utilizing the Steel Slag. *Journal of CO<sub>2</sub> Utilization* **2020**, 37, 113–121, doi:10.1016/j.jcou.2019.12.005.
1867. Qian, C.; Yu, X.; Zheng, T.; Chen, Y. Review on Bacteria Fixing CO<sub>2</sub> and Bio-Mineralization to Enhance the Performance of Construction Materials. *Journal of CO<sub>2</sub> Utilization* **2022**, 55, doi:10.1016/j.jcou.2021.101849.
1868. Wang, D.; Chang, J.; Ansari, W.S. The Effects of Carbonation and Hydration on the Mineralogy and Microstructure of Basic Oxygen Furnace Slag Products. *Journal of CO<sub>2</sub> Utilization* **2019**, 34, 87–98, doi:10.1016/j.jcou.2019.06.001.
1869. Zhang, Y.; Wang, R.; Liu, Z.; Zhang, Z. A Novel Carbonate Binder from Waste Hydrated Cement Paste for Utilization of CO<sub>2</sub>. *Journal of CO<sub>2</sub> Utilization* **2019**, 32, 276–280, doi:10.1016/j.jcou.2019.05.001.
1870. Hou, F.; Han, X.; Li, S.; Li, W. Optimization Research of Construction Methods and Parameters of Large-Span City Coastal Tunnel in Horizontal Layered Rockmass. *Journal of Coastal Research* **2019**, 94, 232–236, doi:10.2112/SI94-049.1.
1871. Wang, X.; Song, B.; Qian, Y.; Lao, J. Study of Wind-Induced Vibration of a High-Rise and Thin-Walled Steel Tower. *Journal of Coastal Research* **2020**, 108, 78–82, doi:10.2112/JCR-SI108-016.1.
1872. Wang, X.; Wang, C.; Du, J. Application of Wireless Sensor in Bridge Quality Inspection of Cross-Sea Steel Frame Structure. *Journal of Coastal Research* **2020**, 115, 4–6, doi:10.2112/JCR-SI115-002.1.
1873. Wang, X.; Song, B.; Qian, Y.; Lao, J. Study of Wind-Induced Vibration of a High-Rise and Thin-Walled Steel Tower. *Journal of Coastal Research* **2020**, 78–82, doi:10.2112/JCR-SI108-016.1.

1874. Tiwari, A.K.; Orioli, S.; De Maio, M. Assessment of Groundwater Geochemistry and Diffusion of Hexavalent Chromium Contamination in an Industrial Town of Italy. *Journal of Contaminant Hydrology* **2019**, *225*, doi:10.1016/j.jconhyd.2019.103503.
1875. Ashmawy, M.; Abu-Elyazeed, O.; Attai, Y.A.; Danial, M. Influence of Waste Type with Co-Digestion System on Methane Production of Patch Digester Stirred with Exhaust Gases. *Journal of Degraded and Mining Lands Management* **2022**, *9*, 3465–3474, doi:10.15243/jdmlm.2022.093.3465.
1876. Kamińska, J.; Puzio, S.; Angrecki, M.; Stachowicz, M.; Łoś, A. Preliminary Tests of Innovative Eco-Friendly Furfuryl Resins and Foundry Sand Mixtures Based on These Resins. *Journal of Ecological Engineering* **2019**, *20*, 285–292, doi:10.12911/22998993/112510.
1877. Sayara, T.; Shadouf, M.; Issa, H.; Obaid, H.; Hanoun, R. Home Composting of Food Wastes Using Rotary Drum Reactor as an Alternative Treatment Option for Organic Household Wastes. *Journal of Ecological Engineering* **2022**, *23*, 139–147, doi:10.12911/22998993/147873.
1878. Singh, V.; Buelens, L.C.; Poelman, H.; Saeys, M.; Marin, G.B.; Galvita, V.V. Carbon Monoxide Production Using a Steel Mill Gas in a Combined Chemical Looping Process. *Journal of Energy Chemistry* **2022**, *68*, 811–825, doi:10.1016/j.jechem.2021.12.042.
1879. Thomas, J.M.; Edwards, P.P.; Dobson, P.J.; Owen, G.P. Decarbonising Energy: The Developing International Activity in Hydrogen Technologies and Fuel Cells. *Journal of Energy Chemistry* **2020**, *51*, 405–415, doi:10.1016/j.jechem.2020.03.087.
1880. Liu, F.-G.; Zhou, W.; Zheng, L.; Shao, M.; Cheng, B. Monitoring the Combustion Characteristic of Premixed Burners with Flame Ionization Current. *Journal of Energy Engineering* **2021**, *147*, doi:10.1061/(ASCE)EY.1943-7897.0000756.
1881. Berdiyeva, P.; Karabanova, A.; Makowska, M.G.; Johnsen, R.E.; Blanchard, D.; Hauback, B.C.; Deleda, S. In-Situ Neutron Imaging Study of NH<sub>3</sub> Absorption and Desorption in SrCl<sub>2</sub> within a Heat Storage Prototype Reactor. *Journal of Energy Storage* **2020**, *29*, doi:10.1016/j.est.2020.101388.
1882. Dhas, S.D.; Maldar, P.S.; Patil, M.D.; Waikar, M.R.; Sonkawade, R.G.; Moholkar, A.V. Sol-Gel Synthesized Nickel Oxide Nanostructures on Nickel Foam and Nickel Mesh for a Targeted Energy Storage Application. *Journal of Energy Storage* **2022**, *47*, doi:10.1016/j.est.2021.103658.
1883. Farzan, H.; Zaim, E.H. Feasibility Study on Using Asphalt Pavements as Heat Absorbers and Sensible Heat Storage Materials in Solar Air Heaters: An Experimental Study. *Journal of Energy Storage* **2021**, *44*, doi:10.1016/j.est.2021.103383.
1884. Fernández, A.G.; Cabeza, L.F. Corrosion Evaluation of Eutectic Chloride Molten Salt for New Generation of CSP Plants. Part 2: Materials Screening Performance. *Journal of Energy Storage* **2020**, *29*, doi:10.1016/j.est.2020.101381.
1885. Grandjean, T.R.B.; Groenewald, J.; Marco, J. The Experimental Evaluation of

- Lithium Ion Batteries after Flash Cryogenic Freezing. *Journal of Energy Storage* **2019**, *21*, 202–215, doi:10.1016/j.est.2018.11.027.
1886. Grandjean, T.R.B.; Groenewald, J.; McGordon, A.; Marco, J. Cycle Life of Lithium Ion Batteries after Flash Cryogenic Freezing. *Journal of Energy Storage* **2019**, *24*, doi:10.1016/j.est.2019.100804.
1887. Jacob, R.; Sergeev, D.; Müller, M. Valorisation of Waste Materials for High Temperature Thermal Storage: A Review. *Journal of Energy Storage* **2022**, *47*, doi:10.1016/j.est.2021.103645.
1888. Manai, M.S.; Leturia, M.; Pohlmann, C.; Oubraham, J.; Mottelet, S.; Levy, M.; Saleh, K. Comparative Study of Different Storage Bed Designs of a Solid-State Hydrogen Tank. *Journal of Energy Storage* **2019**, *26*, doi:10.1016/j.est.2019.101024.
1889. Villada, C.; Toro, A.; Bolívar, F. Corrosion Performance of Austenitic Stainless Steel SS304 in Molten Nitrate Salts and Raman Microscopy for Stability Analysis in Thermal Energy Storage Applications. *Journal of Energy Storage* **2021**, *44*, doi:10.1016/j.est.2021.103465.
1890. Zhu, F.; Zhou, R.; Sypek, D.; Deng, J.; Bae, C. Failure Behavior of Prismatic Li-Ion Battery Cells under Abuse Loading Condition - A Combined Experimental and Computational Study. *Journal of Energy Storage* **2022**, *48*, doi:10.1016/j.est.2022.103969.
1891. Park, B.; Kim, W.; Hwang, S.; Kwon, O. A Study on the Cut-Slope Maintenance According to Anchor Tension Force. *Journal of Engineering Geology* **2020**, *30*, 673–682, doi:10.9720/kseg.2020.4.673.
1892. Seo, D.G.; Suh, J.W.; Chae, J.U.; Kim, S.J.; Yun, T.S.; Chung, I.-M. Improvement of Sand Dam Design for Safety and Increased Water Storage. *Journal of Engineering Geology* **2020**, *30*, 279–288, doi:10.9720/kseg.2020.3.279.
1893. Beskardes, G.D.; McAliley, W.A.; Ahmadian, M.; Chapman, D.T.; Weiss, C.J.; Heath, J.E. Power Density Distribution in Subsurface Fractures Due to an Energized Steel Well-Casing Source. *Journal of Environmental and Engineering Geophysics* **2019**, *24*, 285–297, doi:10.2113/JEEG24.2.285.
1894. Coe, J.T.; Kermani, B.; Nyquist, J. Evaluation of Unknown Bridge Foundations Using Borehole-Based Nondestructive Testing Methods: A Case Study in Urban Settings. *Journal of Environmental and Engineering Geophysics* **2019**, *24*, 299–315, doi:10.2113/JEEG24.2.299.
1895. Chen, D.; Zhang, Z.; Liu, X.; Wang, Q.; Zhao, B.; Ren, G.; Wang, C. Experimental Study on Mechanical Properties of Rebar in Steel Half-Grouted Sleeve Connections with Construction Defects. *Journal of Environmental and Public Health* **2022**, *2022*, doi:10.1155/2022/9379135.
1896. Mashaly, A.; Mahmoud, A.; Ebaid, H.; Sammour, R. Effect of Height to Ground Level on the Insect Attraction to Exposed Rabbit Carcasses. *Journal of Environmental Biology* **2020**, *41*, 73–78, doi:10.22438/jeb/41/1/MRN-1125.
1897. Ali, S.S.; Ali, S.S.; Tabassum, N. A Review on CO<sub>2</sub> Hydrogenation to Ethanol: Reaction Mechanism and Experimental Studies. *Journal of Environmental Chemical*

- Engineering* **2022**, *10*, doi:10.1016/j.jece.2021.106962.
1898. Castaño, S.V.; La Plante, E.C.; Collin, M.; Sant, G.; Pilon, L. A Pilot-Process for Calcium Hydroxide Production from Iron Slag by Low-Temperature Precipitation. *Journal of Environmental Chemical Engineering* **2022**, *10*, doi:10.1016/j.jece.2022.107792.
1899. Chang, L.; Tan, J. An Integrated Sustainability Assessment of Drinking Straws. *Journal of Environmental Chemical Engineering* **2021**, *9*, doi:10.1016/j.jece.2021.105527.
1900. Ciro, E.; Dell'Era, A.; Pasquali, M.; Lupi, C. Indium Electrowinning Study from Sulfate Aqueous Solution Using Different Metal Cathodes. *Journal of Environmental Chemical Engineering* **2020**, *8*, doi:10.1016/j.jece.2020.103688.
1901. De Azevedo Gonçalves, A.; De Matos, D.B.; Galvão, D.G.; Lima, Á.S.; Cavalcanti, E.B. Treatment of Beauty Salon Effluents Using Advanced Oxidative Electrochemical Processes with Boron-Doped Diamond Anode. *Journal of Environmental Chemical Engineering* **2022**, *10*, doi:10.1016/j.jece.2022.108376.
1902. Dehghani, A.; Bahlakeh, G.; Ramezanzadeh, B.; Mofidabadi, A.H.J. Cyclodextrin-Based Nano-Carrier for Intelligent Delivery of Dopamine in a Self-Healable Anti-Corrosion Coating. *Journal of Environmental Chemical Engineering* **2021**, *9*, doi:10.1016/j.jece.2021.105457.
1903. Hu, K.; Song, S.; Zhang, H.; Shen, Z.; Xiao, S.; Han, S.; Wang, H. Degradation of Sulfadiazine in a Cyclic V-SDBD Plasma System: Parameters Analysis and Degradation Pathway. *Journal of Environmental Chemical Engineering* **2022**, *10*, doi:10.1016/j.jece.2022.107415.
1904. Ju, J.; Feng, Y.; Li, H.; Wu, R.; Wang, B. An Approach towards Utilization of Water-Quenched Blast Furnace Slag for Recovery of Titanium, Magnesium, and Aluminum. *Journal of Environmental Chemical Engineering* **2022**, *10*, doi:10.1016/j.jece.2022.108153.
1905. Khan, N.; Anwer, A.H.; Sultana, S.; Ibadon, A.; Khan, M.Z. Effective Toxicity Assessment of Synthetic Dye in Microbial Fuel Cell Biosensor with Spinel Nanofiber Anode. *Journal of Environmental Chemical Engineering* **2022**, *10*, doi:10.1016/j.jece.2022.107313.
1906. Laasonen, E.; Ruuskanen, V.; Niemelä, M.; Koiranen, T.; Ahola, J. Insights into Carbon Production by CO<sub>2</sub> Reduction in Molten Salt Electrolysis in Coaxial-Type Reactor. *Journal of Environmental Chemical Engineering* **2022**, *10*, doi:10.1016/j.jece.2021.106933.
1907. Liem-Nguyen, V.; Sjöberg, V.; Dinh, N.P.; Huy, D.H.; Karlsson, S. Removal Mechanism of Arsenic (V) by Stainless Steel Slags Obtained from Scrap Metal Recycling. *Journal of Environmental Chemical Engineering* **2020**, *8*, doi:10.1016/j.jece.2020.103833.
1908. Mahmoud, M.E.; Saleh, M.M.; Zaki, M.M.; Nabil, G.M. A Sustainable Nanocomposite for Removal of Heavy Metals from Water Based on Crosslinked Sodium Alginate with Iron Oxide Waste Material from Steel Industry. *Journal of*

- Environmental Chemical Engineering* **2020**, *8*, doi:10.1016/j.jece.2020.104015.
1909. Park, J.; Lee, S.Y.; Kim, J.; Um, W.; Lee, I.-B.; Yoo, C. Energy, Safety, and Absorption Efficiency Evaluation of a Pilot-Scale H<sub>2</sub>S Abatement Process Using MDEA Solution in a Coke-Oven Gas. *Journal of Environmental Chemical Engineering* **2021**, *9*, doi:10.1016/j.jece.2021.105037.
1910. Ramesh, K.; Gnanamangai, B.M.; Mohanraj, R. Investigating Techno-Economic Feasibility of Biologically Pretreated Textile Wastewater Treatment by Electrochemical Oxidation Process towards Zero Sludge Concept. *Journal of Environmental Chemical Engineering* **2021**, *9*, doi:10.1016/j.jece.2021.106289.
1911. Rezgui, S.; Ghazouani, M.; Bousselmi, L.; Akrou, H. Efficient Treatment for Tannery Wastewater through Sequential Electro-Fenton and Electrocoagulation Processes. *Journal of Environmental Chemical Engineering* **2022**, *10*, doi:10.1016/j.jece.2022.107424.
1912. Woods, R.M.; Searle, J.R.; Pursglove, A.; Worsley, D.A. Comparison of the Photoactivity of TiO<sub>2</sub> Coatings Using a Flat Panel Reactor and FTIR to Monitor the CO<sub>2</sub> Evolution Rate. *Journal of Environmental Chemical Engineering* **2019**, *7*, doi:10.1016/j.jece.2019.103336.
1913. Yu, Y.-H.; Du, C.-M.; Fan, S.-L.; Yu, W.-M. Acid-Leaching Separation of Phosphorus from the BOF Slag Modified with Al<sub>2</sub>O<sub>3</sub>. *Journal of Environmental Chemical Engineering* **2022**, *10*, doi:10.1016/j.jece.2022.108394.
1914. Zhang, W.; Zhang, T.; Li, T.; Lv, G.; Cao, X. Basic Research on the Leaching Behavior of Vanadium-Bearing Steel Slag with Titanium White Waste Acid. *Journal of Environmental Chemical Engineering* **2021**, *9*, doi:10.1016/j.jece.2020.104897.
1915. YOKOYAMA, K. Study on Worldwide Embodied Impacts of Construction. *Journal of Environmental Engineering (Japan)* **2021**, *86*, 101–109, doi:10.3130/aije.86.101.
1916. Arjmandi, S.; Tabesh, M.; Esfahani, S.T. Risk Analysis of Water Reuse for Industrial Cooling Water Consumptions. *Journal of Environmental Engineering (United States)* **2019**, *145*, doi:10.1061/(ASCE)EE.1943-7870.0001580.
1917. Chetri, J.K.; Reddy, K.R.; Grubb, D.G. Carbon-Dioxide and Hydrogen-Sulfide Removal from Simulated Landfill Gas Using Steel Slag. *Journal of Environmental Engineering (United States)* **2020**, *146*, doi:10.1061/(ASCE)EE.1943-7870.0001826.
1918. Reddy, K.R.; Gopakumar, A.; Chetri, J.K.; Kumar, G.; Grubb, D.G. Sequestration of Landfill Gas Emissions Using Basic Oxygen Furnace Slag: Effects of Moisture Content and Humid Gas Flow Conditions. *Journal of Environmental Engineering (United States)* **2019**, *145*, doi:10.1061/(ASCE)EE.1943-7870.0001539.
1919. Pharr, C.R.; Rowley, J.G.; Weber, M.; Adams, D.; Gray, I.; Hanson, E.; Hilborn, G.; Kong, V.; Patello, E.; Schmidt, S.; et al. Quantifying the Rate Copper Leaches From a Copper Drinking Vessel Into Simulated Beverages Under Conditions of Consumer Use. *Journal of Environmental Health* **2022**, *84*, 8–13.
1920. Hesami Arani, M.; Jaafarzadeh, N.; Moslemzadeh, M.; Rezvani Ghalhari, M.; Bagheri Arani, S.; Mohammadzadeh, M. Dispersion of NO<sub>2</sub> and SO<sub>2</sub> Pollutants in

- the Rolling Industry with AERMOD Model: A Case Study to Assess Human Health Risk. *Journal of Environmental Health Science and Engineering* **2021**, *19*, 1287–1298, doi:10.1007/s40201-021-00686-x.
1921. Moradnia, M.; Movahedian Attar, H.; Heidari, Z.; Mohammadi, F.; Kelishadi, R. Monitoring of Urinary Arsenic (As) and Lead (Pb) among a Sample of Pregnant Iranian Women. *Journal of Environmental Health Science and Engineering* **2021**, *19*, 1901–1909, doi:10.1007/s40201-021-00743-5.
1922. Agarski, B.; Vukelic, D.; Micunovic, M.; Budak, I. Evaluation of the Environmental Impact of Plastic Cap Production, Packaging, and Disposal. *Journal of Environmental Management* **2019**, *245*, 55–65, doi:10.1016/j.jenvman.2019.05.078.
1923. Al Irsyad, M.I.; Halog, A.; Nepal, R. Estimating the Impacts of Financing Support Policies towards Photovoltaic Market in Indonesia: A Social-Energy-Economy-Environment Model Simulation. *Journal of Environmental Management* **2019**, *230*, 464–473, doi:10.1016/j.jenvman.2018.09.069.
1924. Amin, A.M.M.; Rayan, D.A.; Ahmed, Y.M.Z.; El-Shall, M.S.; Abdelbasir, S.M. Zinc Ferrite Nanoparticles from Industrial Waste for Se (IV) Elimination from Wastewater. *Journal of Environmental Management* **2022**, *312*, doi:10.1016/j.jenvman.2022.114956.
1925. Benjamin, C.; Figueiredo, N. The Ship Recycling Market in Brazil - The Amazon Potential. *Journal of Environmental Management* **2020**, *253*, doi:10.1016/j.jenvman.2019.109540.
1926. Blanco, I.; Vox, G.; Schettini, E.; Russo, G. Assessment of the Environmental Loads of Green Façades in Buildings: A Comparison with Un-Vegetated Exterior Walls. *Journal of Environmental Management* **2021**, *294*, doi:10.1016/j.jenvman.2021.112927.
1927. Conejo, A.N.; Birat, J.-P.; Dutta, A. A Review of the Current Environmental Challenges of the Steel Industry and Its Value Chain. *Journal of Environmental Management* **2020**, *259*, doi:10.1016/j.jenvman.2019.109782.
1928. Cudjoe, D.; Wang, H.; Zhu, B. Assessment of the Potential Energy and Environmental Benefits of Solid Waste Recycling in China. *Journal of Environmental Management* **2021**, *295*, doi:10.1016/j.jenvman.2021.113072.
1929. Deepti; Bora, U.; Purkait, M.K. Promising Integrated Technique for the Treatment of Highly Saline Nanofiltration Rejected Stream of Steel Industry. *Journal of Environmental Management* **2021**, *300*, doi:10.1016/j.jenvman.2021.113781.
1930. Deepti; Sinha, A.; Biswas, P.; Sarkar, S.; Bora, U.; Purkait, M.K. Utilization of LD Slag from Steel Industry for the Preparation of MF Membrane. *Journal of Environmental Management* **2020**, *259*, doi:10.1016/j.jenvman.2019.110060.
1931. Gandon-Ros, G.; Aracil, I.; Gómez-Rico, M.F.; Conesa, J.A. Mechanochemical Debromination of Waste Printed Circuit Boards with Marble Sludge in a Planetary Ball Milling Process. *Journal of Environmental Management* **2022**, *317*, doi:10.1016/j.jenvman.2022.115431.
1932. Gomes, H.I.; Mayes, W.M.; Whitby, P.; Rogerson, M. Constructed Wetlands for Steel Slag Leachate Management: Partitioning of Arsenic, Chromium, and



- Vanadium in Waters, Sediments, and Plants. *Journal of Environmental Management* **2019**, *243*, 30–38, doi:10.1016/j.jenvman.2019.04.127.
1933. Huang, D.; Dinga, C.D.; Wen, Z.; Razmadze, D. Industrial-Environmental Management in China's Iron and Steel Industry under Multiple Objectives and Uncertainties. *Journal of Environmental Management* **2022**, *310*, doi:10.1016/j.jenvman.2022.114785.
1934. Kaliyavaradhan, S.K.; Ling, T.-C.; Guo, M.-Z.; Mo, K.H. Waste Resources Recycling in Controlled Low-Strength Material (CLSM): A Critical Review on Plastic Properties. *Journal of Environmental Management* **2019**, *241*, 383–396, doi:10.1016/j.jenvman.2019.03.017.
1935. Kamali, M.; Sheibani, S.; Ataie, A. Magnetic  $\text{MgFe}_2\text{O}_4\text{-CaFe}_2\text{O}_4$  S-Scheme Photocatalyst Prepared from Recycling of Electric Arc Furnace Dust. *Journal of Environmental Management* **2021**, *290*, doi:10.1016/j.jenvman.2021.112609.
1936. Kouanda, A.; Hua, G. Effects of Different Pairing Configurations of Woodchips and Steel Chips in Dual Media Treatment Systems on Nutrient Removal and Organics and Iron Leaching. *Journal of Environmental Management* **2021**, *300*, doi:10.1016/j.jenvman.2021.113722.
1937. Li, D.-Y.; Cho, Y.-C.; Hsu, M.H.; Lin, Y.-P. Recovery of Phosphate and Ammonia from Wastewater via Struvite Precipitation Using Spent Refractory Brick Gravel from Steel Industry. *Journal of Environmental Management* **2022**, *302*, doi:10.1016/j.jenvman.2021.114110.
1938. Lim, Y.C.; Shih, Y.-J.; Tsai, K.-C.; Yang, W.-D.; Chen, C.-W.; Dong, C.-D. Recycling Dredged Harbor Sediment to Construction Materials by Sintering with Steel Slag and Waste Glass: Characteristics, Alkali-Silica Reactivity and Metals Stability. *Journal of Environmental Management* **2020**, *270*, doi:10.1016/j.jenvman.2020.110869.
1939. Liu, J.; Ren, S.; Zhou, Y.; Tsang, D.C.W.; Lippold, H.; Wang, J.; Yin, M.; Xiao, T.; Luo, X.; Chen, Y. High Contamination Risks of Thallium and Associated Metal(Loid)s in Fluvial Sediments from a Steel-Making Area and Implications for Environmental Management. *Journal of Environmental Management* **2019**, *250*, doi:10.1016/j.jenvman.2019.109513.
1940. Liu, X.; Yan, F.; Hua, H.; Yuan, Z. Identifying Hotspots Based on High-Resolution Emission Inventory of Volatile Organic Compounds: A Case Study in China. *Journal of Environmental Management* **2021**, *288*, doi:10.1016/j.jenvman.2021.112419.
1941. Martinez, S.; Delgado, M.D.M.; Martinez Marin, R.; Marchamalo, M.; Alvarez, S. Pre-Construction Quantification of Embodied Environmental Impacts to Promote Sustainable Construction Projects: The Case Study of a Diversion Dam. *Journal of Environmental Management* **2022**, *314*, doi:10.1016/j.jenvman.2022.115061.
1942. Mensah, K.; Samy, M.; Ezz, H.; Elkady, M.; Shokry, H. Utilization of Iron Waste from Steel Industries in Persulfate Activation for Effective Degradation of Dye Solutions. *Journal of Environmental Management* **2022**, *314*, doi:10.1016/j.jenvman.2022.115108.
1943. Miatto, A.; Dawson, D.; Nguyen, P.D.; Kanaoka, K.S.; Tanikawa, H. The

- Urbanisation-Environment Conflict: Insights from Material Stock and Productivity of Transport Infrastructure in Hanoi, Vietnam. *Journal of Environmental Management* **2021**, *294*, doi:10.1016/j.jenvman.2021.113007.
1944. Morgan, D.R.; Styles, D.; Thomas Lane, E. Packaging Choice and Coordinated Distribution Logistics to Reduce the Environmental Footprint of Small-Scale Beer Value Chains. *Journal of Environmental Management* **2022**, *307*, doi:10.1016/j.jenvman.2022.114591.
1945. Moussavi, S.; Thompson, M.; Li, S.; Dvorak, B. Assessment of Small Mechanical Wastewater Treatment Plants: Relative Life Cycle Environmental Impacts of Construction and Operations. *Journal of Environmental Management* **2021**, *292*, doi:10.1016/j.jenvman.2021.112802.
1946. Müller, A.; Österlund, H.; Marsalek, J.; Viklander, M. Comparison of Three Explorative Methods for Identifying Building Surface Materials Contributing Pollutants to Stormwater. *Journal of Environmental Management* **2021**, *299*, doi:10.1016/j.jenvman.2021.113574.
1947. Nagels, M.; Verhoeven, B.; Larché, N.; Dewil, R.; Rossi, B. Comparative Life Cycle Cost Assessment of (Lean) Duplex Stainless Steel in Wastewater Treatment Environments. *Journal of Environmental Management* **2022**, *306*, doi:10.1016/j.jenvman.2021.114375.
1948. Nagle, A.J.; Mullally, G.; Leahy, P.G.; Dunphy, N.P. Life Cycle Assessment of the Use of Decommissioned Wind Blades in Second Life Applications. *Journal of Environmental Management* **2022**, *302*, doi:10.1016/j.jenvman.2021.113994.
1949. Nezamoleslami, R.; Hosseinian, S. An Improved Water Footprint Model of Steel Production Concerning Virtual Water of Personnel: The Case of Iran. *Journal of Environmental Management* **2020**, *260*, doi:10.1016/j.jenvman.2020.110065.
1950. Piszcz-Karas, K.; Klein, M.; Hupka, J.; Luczak, J. Utilization of Shale Cuttings in Production of Lightweight Aggregates. *Journal of Environmental Management* **2019**, *231*, 232–240, doi:10.1016/j.jenvman.2018.09.101.
1951. Sam, J.; Kirankumar, P.S.; Sanath, K.; Prathish, K.P. Development of Saleable Chloride Free Iron Oxide from Hazardous Waste in Titanium Industries via Layered Double Hydroxide Formation. *Journal of Environmental Management* **2021**, *290*, doi:10.1016/j.jenvman.2021.112566.
1952. Sellner, B.M.; Hua, G.; Ahiablame, L.M. Fixed Bed Column Evaluation of Phosphate Adsorption and Recovery from Aqueous Solutions Using Recycled Steel Byproducts. *Journal of Environmental Management* **2019**, *233*, 595–602, doi:10.1016/j.jenvman.2018.12.070.
1953. Shan, W.; Jin, X.; Yang, X.; Gu, Z.; Han, B.; Li, H.; Zhou, Y. A Framework for Assessing Carbon Effect of Land Consolidation with Life Cycle Assessment: A Case Study in China. *Journal of Environmental Management* **2020**, *266*, doi:10.1016/j.jenvman.2020.110557.
1954. Si, R.; Xin, J.; Zhang, W.; Tian, Y.; Xu, X.; Wen, T.; Ma, Y.; Ma, Y.; Cao, Y.; Liu, Z.; et al. The Environmental Benefit of Beijing-Tianjin-Hebei Coal Banning Area for

- North China. *Journal of Environmental Management* **2022**, *311*, doi:10.1016/j.jenvman.2022.114870.
1955. Sinha, S.; Choudhari, R.; Mishra, D.; Shekhar, S.; Agrawal, A.; Sahu, K.K. Valorisation of Waste Galvanizing Dross: Emphasis on Recovery of Zinc with Zero Effluent Strategy. *Journal of Environmental Management* **2020**, *256*, doi:10.1016/j.jenvman.2019.109985.
1956. Song, L.; Wang, P.; Xiang, K.; Chen, W. Regional Disparities in Decoupling Economic Growth and Steel Stocks: Forty Years of Provincial Evidence in China. *Journal of Environmental Management* **2020**, *271*, doi:10.1016/j.jenvman.2020.111035.
1957. Stuhlmacher, M.; Patnaik, S.; Streletskiy, D.; Taylor, K. Cap-and-Trade and Emissions Clustering: A Spatial-Temporal Analysis of the European Union Emissions Trading Scheme. *Journal of Environmental Management* **2019**, *249*, doi:10.1016/j.jenvman.2019.109352.
1958. Sun, W.; Xu, X.; Lv, Z.; Mao, H.; Wu, J. Environmental Impact Assessment of Wastewater Discharge with Multi-Pollutants from Iron and Steel Industry. *Journal of Environmental Management* **2019**, *245*, 210–215, doi:10.1016/j.jenvman.2019.05.081.
1959. Takayabu, H.; Kagawa, S.; Fujii, H.; Managi, S.; Eguchi, S. Impacts of Productive Efficiency Improvement in the Global Metal Industry on CO<sub>2</sub> Emissions. *Journal of Environmental Management* **2019**, *248*, doi:10.1016/j.jenvman.2019.109261.
1960. Takdastan, A.; Niari, M.H.; Babaei, A.; Dobaradaran, S.; Jorfi, S.; Ahmadi, M. Occurrence and Distribution of Microplastic Particles and the Concentration of Di 2-Ethyl Hexyl Phthalate (DEHP) in Microplastics and Wastewater in the Wastewater Treatment Plant. *Journal of Environmental Management* **2021**, *280*, doi:10.1016/j.jenvman.2020.111851.
1961. Tushar, Q.; Santos, J.; Zhang, G.; Bhuiyan, M.A.; Giustozzi, F. Recycling Waste Vehicle Tyres into Crumb Rubber and the Transition to Renewable Energy Sources: A Comprehensive Life Cycle Assessment. *Journal of Environmental Management* **2022**, *323*, doi:10.1016/j.jenvman.2022.116289.
1962. Wang, G.; Zhang, J.; Zhou, J.; Qian, G. Production of an Effective Catalyst with Increased Oxygen Vacancies from Manganese Slag for Selective Catalytic Reduction of Nitric Oxide. *Journal of Environmental Management* **2019**, *239*, 90–95, doi:10.1016/j.jenvman.2019.03.056.
1963. Wang, S.; Tang, Y.; Du, Z.; Song, M. Export Trade, Embodied Carbon Emissions, and Environmental Pollution: An Empirical Analysis of China's High- and New-Technology Industries. *Journal of Environmental Management* **2020**, *276*, doi:10.1016/j.jenvman.2020.111371.
1964. Wen, Z.; Wang, Y.; Li, H.; Tao, Y.; De Clercq, D. Quantitative Analysis of the Precise Energy Conservation and Emission Reduction Path in China's Iron and Steel Industry. *Journal of Environmental Management* **2019**, *246*, 717–729, doi:10.1016/j.jenvman.2019.06.024.
1965. Wood, J.; Touati, A.; Abdel-Hady, A.; Aslett, D.; Delafield, F.; Calfee, W.; Silvestri,

- E.; Serre, S.; Mickelsen, L.; Tomlinson, C.; et al. Decontamination of Soil Contaminated at the Surface with Bacillus Anthracis Spores Using Dry Thermal Treatment. *Journal of Environmental Management* **2021**, *280*, doi:10.1016/j.jenvman.2020.111684.
1966. Yang, J.; Gu, W.; Wu, B.; Liu, B.; Zhang, B. Towards Cost-Effective Total Pollution Control in Chinese Industries. *Journal of Environmental Management* **2022**, *320*, doi:10.1016/j.jenvman.2022.115744.
1967. Yetilmezsoy, K.; Ilhan, F.; Kiyan, E.; Bahramian, M. A Comprehensive Techno-Economic Analysis of Income-Generating Sources on the Conversion of Real Sheep Slaughterhouse Waste Stream into Valorized by-Products. *Journal of Environmental Management* **2022**, *306*, doi:10.1016/j.jenvman.2022.114464.
1968. Zhang, C.; Zhang, X. Evolutionary Game Analysis of Air Pollution Co-Investment in Emission Reductions by Steel Enterprises under Carbon Quota Trading Mechanism. *Journal of Environmental Management* **2022**, *317*, doi:10.1016/j.jenvman.2022.115376.
1969. Zhang, F.; Xing, J.; Zhou, Y.; Wang, S.; Zhao, B.; Zheng, H.; Zhao, X.; Chang, H.; Jang, C.; Zhu, Y.; et al. Estimation of Abatement Potentials and Costs of Air Pollution Emissions in China. *Journal of Environmental Management* **2020**, *260*, doi:10.1016/j.jenvman.2020.110069.
1970. Zhang, J.; Rahman, Z.U.; Wang, X.; Wang, Z.; Li, P.; Wang, Y.; Bate, D.; Zhao, K.; Tan, H. Hot Corrosion Behaviors of TP347H and HR3C Stainless Steel with KCl Deposit in Oxy-Biomass Combustion. *Journal of Environmental Management* **2020**, *263*, doi:10.1016/j.jenvman.2020.110411.
1971. Zhang, T.; Zhai, Y.; Feng, S.; Tan, X.; Zhang, M.; Duan, L.; Shi, Q.; Meng, J.; Hong, J. Does It Pay to Develop a Ground Source Heat Pump System? Evidence from China. *Journal of Environmental Management* **2022**, *305*, doi:10.1016/j.jenvman.2021.114378.
1972. Zhao, F.; Yue, Q.; He, J.; Li, Y.; Wang, H. Quantifying China's Iron in-Use Stock and Its Driving Factors Analysis. *Journal of Environmental Management* **2020**, *274*, doi:10.1016/j.jenvman.2020.111220.
1973. Zhao, G.; Yu, B.; An, R.; Wu, Y.; Zhao, Z. Energy System Transformations and Carbon Emission Mitigation for China to Achieve Global 2 °C Climate Target. *Journal of Environmental Management* **2021**, *292*, doi:10.1016/j.jenvman.2021.112721.
1974. Zhu, S.; Gao, C.; Song, K.; Gao, W.; Guo, Y.; Gao, C. The Changes in Spatial Layout of Steel Industry in China and Associated Pollutant Emissions: A Case of SO<sub>2</sub>. *Journal of Environmental Management* **2022**, *302*, doi:10.1016/j.jenvman.2021.114034.
1975. Zohar, M.; Matzrafi, M.; Abu-Nassar, J.; Khoury, O.; Gaur, R.Z.; Posmanik, R. Subcritical Water Extraction as a Circular Economy Approach to Recover Energy and Agrochemicals from Sewage Sludge. *Journal of Environmental Management* **2021**, *285*, doi:10.1016/j.jenvman.2021.112111.
1976. Cakiroglu, C.; Islam, K.; Bekdaş, G.; Apak, S. COST AND CO<sub>2</sub> EMISSION-BASED OPTIMISATION OF REINFORCED CONCRETE DEEP BEAMS USING JAYA

- ALGORITHM. *Journal of Environmental Protection and Ecology* **2022**, *23*, 2420–2429.
1977. Vijaya Prakash, B.; Sundarapandian, S. EVALUATING THE MECHANICAL PROPERTIES OF TMT STEEL RODS FOR MINIMISING SOLID WASTE AND ENVIRONMENTAL POLLUTION. *Journal of Environmental Protection and Ecology* **2022**, *23*, 130–141.
1978. Yucel, M.; Bekdas, G.; Isikdag, U.; Apak, S. Optimum Modelling for Rectangular Shape Reinforced Concrete (Rc) Beam with the Aim of Minimum Co2 Emission. *Journal of Environmental Protection and Ecology* **2021**, *22*, 1992–2002.
1979. Kerr, B.J.; Trabue, S.L.; Andersen, D.S.; Van Weelden, M.B.; Pepple, L.M. Dietary Composition and Particle Size Effects on Swine Manure Characteristics and Gas Emissions. *Journal of Environmental Quality* **2020**, *49*, 1384–1395, doi:10.1002/jeq2.20112.
1980. Genda, T.; Knight, K.; Dai, Z.R.; Balboni, E.; Goldblum, B.L.; Hosemann, P. Iron-Rich Microstructure Records of High Temperature Multi-Component Silicate Melt Behavior in Nuclear Fallout. *Journal of Environmental Radioactivity* **2021**, *237*, doi:10.1016/j.jenvrad.2021.106700.
1981. MacIntosh, A.; Koppel, D.J.; Johansen, M.P.; Beresford, N.A.; Copplestone, D.; Penrose, B.; Cresswell, T. Radiological Risk Assessment to Marine Biota from Exposure to NORM from a Decommissioned Offshore Oil and Gas Pipeline. *Journal of Environmental Radioactivity* **2022**, *251–252*, doi:10.1016/j.jenvrad.2022.106979.
1982. Murugan, R.; Kavasi, N.; Sahoo, S.K.; Omori, Y.; Sorimachi, A.; Takahashi, H.; Aono, T. Measurement of Uranium Isotope Ratios in Fukushima-Accident Contaminated Soil Samples Using Multi Collector Inductively Coupled Plasma Mass Spectrometry. *Journal of Environmental Radioactivity* **2021**, *232*, doi:10.1016/j.jenvrad.2021.106568.
1983. Palušová, V.; Breier, R.; Chauveau, E.; Piquemal, F.; Povinec, P.P. Natural Radionuclides as Background Sources in the Modane Underground Laboratory. *Journal of Environmental Radioactivity* **2020**, *216*, doi:10.1016/j.jenvrad.2020.106185.
1984. Pirkkanen, J.; Laframboise, T.; Liimatainen, P.; Sonley, T.; Stankiewicz, S.; Hood, M.; Obaid, M.; Zarnke, A.; Tai, T.C.; Lees, S.J.; et al. A Novel Specialized Tissue Culture Incubator Designed and Engineered for Radiobiology Experiments in a Sub-Natural Background Radiation Research Environment. *Journal of Environmental Radioactivity* **2021**, *228*, doi:10.1016/j.jenvrad.2020.106512.
1985. Punia, S.; Wu, L.; Khodadoust, A.P. Adsorption of Hexavalent Chromium from Water Using Manganese-Aluminum Coated Sand: Kinetics, Equilibrium, Effect of PH and Ionic Strength. *Journal of Environmental Science and Health - Part A Toxic/Hazardous Substances and Environmental Engineering* **2021**, *56*, 334–345, doi:10.1080/10934529.2021.1877513.
1986. Suttiviriya, T.; Kongpran, J. Contamination and Ecological Risk of Microplastics and Phthalates in the Surface Water of the Tha Dee Sub-River Basin, Nakhon Si Thammarat Province, Thailand. *Journal of Environmental Science and Health - Part A*

- Toxic/Hazardous Substances and Environmental Engineering* **2022**, *57*, 448–459, doi:10.1080/10934529.2022.2076512.
1987. Cai, M.; Liu, X.; Zhu, T.; Zou, Y.; Tao, W.; Tian, M. Simultaneous Removal of SO<sub>2</sub> and NO Using a Spray Dryer Absorption (SDA) Method Combined with O<sub>3</sub> Oxidation for Sintering/Pelleting Flue Gas. *Journal of Environmental Sciences (China)* **2020**, *96*, 64–71, doi:10.1016/j.jes.2020.04.018.
1988. Liu, F.; Cai, M.; Liu, X.; Zhu, T.; Zou, Y. O<sub>3</sub> Oxidation Combined with Semi-Dry Method for Simultaneous Desulfurization and Denitrification of Sintering/Pelletizing Flue Gas. *Journal of Environmental Sciences (China)* **2021**, *104*, 253–263, doi:10.1016/j.jes.2020.11.021.
1989. Su, P.; Zhang, J.; Li, Y. Chemical Fixation of Toxic Metals in Stainless Steel Pickling Residue by Na<sub>2</sub>S·xH<sub>2</sub>O, FeSO<sub>4</sub>·6H<sub>2</sub>O and Phosphoric Acid for Beneficial Uses. *Journal of Environmental Sciences (China)* **2020**, *90*, 364–374, doi:10.1016/j.jes.2019.12.016.
1990. Wang, N.; Zhou, L.; Feng, M.; Song, T.; Zhao, Z.; Song, D.; Tan, Q.; Yang, F. Progressively Narrow the Gap of PM<sub>2.5</sub> Pollution Characteristics at Urban and Suburban Sites in a Megacity of Sichuan Basin, China. *Journal of Environmental Sciences (China)* **2023**, *126*, 708–721, doi:10.1016/j.jes.2022.05.017.
1991. Wang, Z.; Bao, Y.; Wang, D.; Wang, M. Effective Removal of Phosphorus from High Phosphorus Steel Slag Using Carbonized Rice Husk. *Journal of Environmental Sciences (China)* **2023**, *124*, 156–164, doi:10.1016/j.jes.2021.10.024.
1992. Wu, X.; Yang, Y.; Gong, Y.; Deng, Z.; Wang, Y.; Wu, W.; Zheng, C.; Zhang, Y. Advances in Air Pollution Control for Key Industries in China during the 13th Five-Year Plan. *Journal of Environmental Sciences (China)* **2022**, doi:10.1016/j.jes.2022.09.008.
1993. Xu, L.; Lingaswamy, A.P.; Zhang, Y.; Liu, L.; Wang, Y.; Zhang, J.; Ma, Q.; Li, W. Morphology, Composition, and Sources of Individual Aerosol Particles at a Regional Background Site of the YRD, China. *Journal of Environmental Sciences (China)* **2019**, *77*, 354–362, doi:10.1016/j.jes.2018.09.011.
1994. Xu, X.; Zhang, L.; Zhang, X.; Guan, X.; Wei, D. Effect of Mn<sup>2+</sup> on the Phosphorus Removal and Bioflocculation under Anoxic Condition. *Journal of Environmental Sciences (China)* **2022**, *115*, 37–46, doi:10.1016/j.jes.2021.07.012.
1995. Xu, X.; Liu, S.; Liu, Y.; Smith, K.; Wang, X.; Li, J.; Ma, Z.; Wang, Z.; Cui, Y. Water Quality Induced Corrosion of Stainless Steel Valves during Long-Term Service in a Reverse Osmosis System. *Journal of Environmental Sciences (China)* **2020**, *89*, 218–226, doi:10.1016/j.jes.2019.10.008.
1996. Zhang, J.; Su, P.; Li, Y.; Li, L. Environmental Investigation of Bio-Modification of Steel Slag through Microbially Induced Carbonate Precipitation. *Journal of Environmental Sciences (China)* **2021**, *101*, 282–292, doi:10.1016/j.jes.2020.08.023.
1997. Zhang, Y.; Shan, G.; Dong, F.; Wang, C.; Zhu, L. Glass Fiber Supported BiOI Thin-Film Fixed-Bed Photocatalytic Reactor for Water Decontamination under Solar Light Irradiation. *Journal of Environmental Sciences (China)* **2019**, *80*, 277–286,

- doi:10.1016/j.jes.2019.01.004.
1998. Zhou, X.; Strezov, V.; Jiang, Y.; Kan, T.; Evans, T. Temporal and Spatial Variations of Air Pollution across China from 2015 to 2018. *Journal of Environmental Sciences (China)* **2022**, *112*, 161–169, doi:10.1016/j.jes.2021.04.025.
  1999. Zhu, T.; Wang, X.; Yu, Y.; Li, C.; Yao, Q.; Li, Y. Multi-Process and Multi-Pollutant Control Technology for Ultra-Low Emissions in the Iron and Steel Industry. *Journal of Environmental Sciences (China)* **2022**, doi:10.1016/j.jes.2022.01.044.
  2000. Long, C.M.; Briggs, N.L.; Cochran, B.A.; Mims, D.M. Health-Based Evaluation of Ambient Air Measurements of PM<sub>2.5</sub> and Volatile Organic Compounds near a Marcellus Shale Unconventional Natural Gas Well Pad Site and a School Campus. *Journal of Exposure Science and Environmental Epidemiology* **2021**, *31*, 614–627, doi:10.1038/s41370-021-00298-5.
  2001. Dong, S. The Development of Aquaculture in the New Era from a Multi-Dimensional Perspective. *Journal of Fisheries of China* **2019**, *43*, 105–115, doi:10.11964/jfc.20180911441.
  2002. Buckley, R.M.; McAdam, R.A.; Byrne, B.W.; Doherty, J.P.; Jardine, R.J.; Kontoe, S.; Randolph, M.F. Optimization of Impact Pile Driving Using Optical Fiber Bragg-Grating Measurements. *Journal of Geotechnical and Geoenvironmental Engineering* **2020**, *146*, doi:10.1061/(ASCE)GT.1943-5606.0002293.
  2003. Psyrras, N.; Sextos, A.; Crewe, A.; Dietz, M.; Mylonakis, G. Physical Modeling of the Seismic Response of Gas Pipelines in Laterally Inhomogeneous Soil. *Journal of Geotechnical and Geoenvironmental Engineering* **2020**, *146*, doi:10.1061/(ASCE)GT.1943-5606.0002242.
  2004. Smith, A.; Moore, I.D.; Dixon, N. Acoustic Emission Sensing of Pipe-Soil Interaction: Full-Scale Pipelines Subjected to Differential Ground Movements. *Journal of Geotechnical and Geoenvironmental Engineering* **2019**, *145*, doi:10.1061/(ASCE)GT.1943-5606.0002185.
  2005. Tao, L.-J.; Zhang, Y.; Zhao, X.; Bian, J.; Chen, X.-H.; An, S.; Han, X.-C. Group Effect of Pipe Jacking in Silty Sand. *Journal of Geotechnical and Geoenvironmental Engineering* **2021**, *147*, doi:10.1061/(ASCE)GT.1943-5606.0002613.
  2006. Wang, F.; Han, J.; Khatri, D.K.; Parsons, R.L.; Corey, R. Time-Dependent Field Performance of Steel-Reinforced High-Density Polyethylene Pipes in Soil. *Journal of Geotechnical and Geoenvironmental Engineering* **2020**, *146*, doi:10.1061/(ASCE)GT.1943-5606.0002187.
  2007. Altun, M.G.; Oltulu, M. Effect of Different Types of Fiber Utilization on Mechanical Properties of Recycled Aggregate Concrete Containing Silica Fume. *Journal of Green Building* **2020**, *15*, 119–136, doi:10.3992/1943-4618.15.1.119.
  2008. Kayili, M.T.; Celebi, G. Environmental Properties of Environmentally Friendly Construction Materials: Recycled Ldpe Composites Filled by Blast Furnace Dust. *Journal of Green Building* **2021**, *16*, 135–153, doi:10.3992/jgb.16.3.135.
  2009. Kayili, M.T.; Çelebi, G.; Guldaz, A. Morphological, Mechanical, Thermal and Tribological Properties of Environmentally Friendly Construction Materials:

- Recycled Ldpe Composites Filled by Blast Furnace Dust. *Journal of Green Building* **2020**, *15*, 159–175, doi:10.3992/JGB.15.3.159.
2010. Pittau, F.; Giacomel, D.; Iannaccone, G.; Malighetti, L. Environmental Consequences of Refurbishment versus Demolition and Reconstruction: A Comparative Life Cycle Assessment of an Italian Case Study. *Journal of Green Building* **2020**, *15*, 155–172, doi:10.3992/jgb.15.4.155.
2011. Pushkar, S.; Ribakov, Y. Environmental Benefit of Two-Layer Steel Fibered High-Performance Concrete Beams. *Journal of Green Building* **2021**, *16*, 237–250, doi:10.3992/jgb.16.3.237.
2012. Ahmad, J.; Al-Dala'ien, R.N.S.; Manan, A.; Zaid, O.; Ahmad, M. Evaluating the Effects of Flexure Cracking Behaviour of Beam Reinforced with Steel Fibres from Environment Affect. *Journal of Green Engineering* **2020**, *10*, 4998–5016.
2013. Bhuvaneshwari, S.; Ravi, A. Development of Sustainable Green Repair Material Using Fibre Reinforced Geopolymer Composites. *Journal of Green Engineering* **2020**, *10*, 494–510.
2014. Chaturvedi, R. Molding Sand Nano Fluidization Role in Ceramic Substitute. *Journal of Green Engineering* **2020**, *10*, 11540–11545.
2015. Mezzal, S.K.; Najim, K.B.; Al-Azzawi, Z. Residual Mechanical Properties of High Strength Self-Compacting Concrete with Reused Steel Fibers at High Temperatures. *Journal of Green Engineering* **2020**, *10*, 3156–3170.
2016. Prabhu, V.; Rooby, J.; Rajaraman, A. Investigational Study on Eco and Energy Friendly Infrastructural Material. *Journal of Green Engineering* **2019**, *9*, 112–135.
2017. Singh, N.; Goindi, G. Techniques to Improve Output Parameters and Machinability during Minimum Quantity Lubrication of Aluminium Alloys. *Journal of Green Engineering* **2020**, *10*, 6317–6325.
2018. Agrawal, V.; Paulose, R.; Arya, R.; Rajak, G.; Giri, A.; Bijanu, A.; Sanghi, S.K.; Mishra, D.; N, P.; Khare, A.K.; et al. Green Conversion of Hazardous Red Mud into Diagnostic X-Ray Shielding Tiles. *Journal of Hazardous Materials* **2022**, *424*, doi:10.1016/j.jhazmat.2021.127507.
2019. Akbarzadeh, S.; Ramezanzadeh, M.; Ramezanzadeh, B.; Bahlakeh, G. A Green Assisted Route for the Fabrication of a High-Efficiency Self-Healing Anti-Corrosion Coating through Graphene Oxide Nanoplatfrom Reduction by Tamarindus Indiacca Extract. *Journal of Hazardous Materials* **2020**, *390*, doi:10.1016/j.jhazmat.2020.122147.
2020. Bang, K.-H.; Kang, Y.-B. Recycling Red Mud to Develop a Competitive Desulfurization Flux for Kanbara Reactor (KR) Desulfurization Process. *Journal of Hazardous Materials* **2022**, *440*, doi:10.1016/j.jhazmat.2022.129752.
2021. Cai, C.; Hua, Y.; Liu, H.; Dai, X. A New Approach to Recycling Cephalosporin Fermentation Residue into Plant Biostimulants. *Journal of Hazardous Materials* **2021**, *413*, doi:10.1016/j.jhazmat.2021.125393.
2022. Chen, D.T.; Au, W.Y.; van Ewijk, S.; Roy, A.; Stegemann, J.A. Elemental and Mineralogical Composition of Metal-Bearing Neutralisation Sludges, and Zinc



- Speciation – A Review. *Journal of Hazardous Materials* **2021**, *416*, doi:10.1016/j.jhazmat.2021.125676.
2023. Chen, F.; Ma, J.; Zhu, Y.; Li, X.; Yu, H.; Sun, Y. Biodegradation Performance and Anti-Fouling Mechanism of an ICME/Electro-Biocarriers-MBR System in Livestock Wastewater (Antibiotic-Containing) Treatment. *Journal of Hazardous Materials* **2022**, *426*, doi:10.1016/j.jhazmat.2021.128064.
2024. Chen, Y.-C.; Shie, R.-H.; Zhu, J.-J.; Hsu, C.-Y. A Hybrid Methodology to Quantitatively Identify Inorganic Aerosol of PM<sub>2.5</sub> Source Contribution. *Journal of Hazardous Materials* **2022**, *428*, doi:10.1016/j.jhazmat.2021.128173.
2025. Chen, Y.; Liu, S.; Ouyang, S.; Shi, Y.; Li, B. A Novel Method for Fe-Al<sub>2</sub>O<sub>3</sub> Composites Prepared from High Sulfur Bayan Obo Iron Concentrate: Effectively Eliminate the Emission of SO<sub>2</sub>. *Journal of Hazardous Materials* **2020**, *389*, doi:10.1016/j.jhazmat.2019.121878.
2026. Cho, H.; Youn, J.-S.; Oh, I.; Jung, Y.-W.; Jeon, K.-J. A New Air-Washing Method to Clean Fabric Filters Clogged with Submicron Fume Particles: A Pilot-Scale Study. *Journal of Hazardous Materials* **2020**, *383*, doi:10.1016/j.jhazmat.2019.121186.
2027. Coppock, R.L.; Lindeque, P.K.; Cole, M.; Galloway, T.S.; Näkki, P.; Birgani, H.; Richards, S.; Queirós, A.M. Benthic Fauna Contribute to Microplastic Sequestration in Coastal Sediments. *Journal of Hazardous Materials* **2021**, *415*, doi:10.1016/j.jhazmat.2021.125583.
2028. Cui, P.; Wu, S.; Xiao, Y.; Hu, R.; Yang, T. Environmental Performance and Functional Analysis of Chip Seals with Recycled Basic Oxygen Furnace Slag as Aggregate. *Journal of Hazardous Materials* **2021**, *405*, doi:10.1016/j.jhazmat.2020.124441.
2029. Cui, P.; Wu, S.; Xiao, Y.; Liu, Q.; Wang, F. Hazardous Characteristics and Variation in Internal Structure by Hydrodynamic Damage of BOF Slag-Based Thin Asphalt Overlay. *Journal of Hazardous Materials* **2021**, *412*, doi:10.1016/j.jhazmat.2021.125344.
2030. Dehghani, A.; Bahlakeh, G.; Ramezanzadeh, B. Synthesis of a Non-Hazardous/Smart Anti-Corrosion Nano-Carrier Based on Beta-Cyclodextrin-Zinc Acetylacetonate Inclusion Complex Decorated Graphene Oxide ( $\beta$ -CD-ZnA-MGO). *Journal of Hazardous Materials* **2020**, *398*, doi:10.1016/j.jhazmat.2020.122962.
2031. Fang, N.; He, Q.; Sheng, L.; Xi, Y.; Zhang, L.; Liu, H.; Cheng, H. Toward Broader Applications of Iron Ore Waste in Pollution Control: Adsorption of Norfloxacin. *Journal of Hazardous Materials* **2021**, *418*, doi:10.1016/j.jhazmat.2021.126273.
2032. Francisca, F.M.; Glatstein, D.A. Environmental Application of Basic Oxygen Furnace Slag for the Removal of Heavy Metals from Leachates. *Journal of Hazardous Materials* **2020**, *384*, doi:10.1016/j.jhazmat.2019.121294.
2033. Gomiero, A.; Øysæd, K.B.; Palmas, L.; Skogerbø, G. Application of GCMS-Pyrolysis to Estimate the Levels of Microplastics in a Drinking Water Supply System. *Journal of Hazardous Materials* **2021**, *416*, doi:10.1016/j.jhazmat.2021.125708.
2034. Hamann, C.; Spanka, M.; Stolle, D.; Auer, G.; Weingart, E.; Al-Sabbagh, D.;

- Ostermann, M.; Adam, C. Recycling of Blast-Furnace Sludge by Thermochemical Treatment with Spent Iron(II) Chloride Solution from Steel Pickling. *Journal of Hazardous Materials* **2021**, *402*, doi:10.1016/j.jhazmat.2020.123511.
2035. Hedberg, Y.S.; Wei, Z.; McCarrick, S.; Romanovski, V.; Theodore, J.; Westin, E.M.; Wagner, R.; Persson, K.-A.; Karlsson, H.L.; Odnevall Wallinder, I. Welding Fume Nanoparticles from Solid and Flux-Cored Wires: Solubility, Toxicity, and Role of Fluorides. *Journal of Hazardous Materials* **2021**, *413*, doi:10.1016/j.jhazmat.2021.125273.
2036. Huang, H.; Zhang, H.; Yan, Y. Preparation of Novel Catalyst-Free Fe<sub>3</sub>C Nanocrystals Encapsulated NCNT Structured Catalyst for Continuous Catalytic Wet Peroxide Oxidation of Phenol. *Journal of Hazardous Materials* **2021**, *407*, doi:10.1016/j.jhazmat.2020.124371.
2037. Huang, X.; Wu, H.; Lu, D. Preparation of Novel Chemically Bonded Ceramics with Steel Slag and Potassium Hydrogen Oxalate. *Journal of Hazardous Materials* **2021**, *403*, doi:10.1016/j.jhazmat.2020.124042.
2038. Huang, Y.; Chen, Y.; Li, Y.; Zhou, L.; Zhang, S.; Wang, J.; Du, W.; Yang, J.; Chen, L.; Meng, W.; et al. Atmospheric Emissions of PCDDs and PCDFs in China from 1960 to 2014. *Journal of Hazardous Materials* **2022**, *424*, doi:10.1016/j.jhazmat.2021.127320.
2039. Javidparvar, A.A.; Naderi, R.; Ramezanzadeh, B. L-Cysteine Reduced/Functionalized Graphene Oxide Application as a Smart/Control Release Nanocarrier of Sustainable Cerium Ions for Epoxy Coating Anti-Corrosion Properties Improvement. *Journal of Hazardous Materials* **2020**, *389*, doi:10.1016/j.jhazmat.2020.122135.
2040. Ji, Z.; Huang, B.; Gan, M.; Fan, X.; Wang, G.; Zhao, Q.; Xing, J.; Yuan, R. Dioxins Control as Co-Processing Water-Washed Municipal Solid Waste Incineration Fly Ash in Iron Ore Sintering Process. *Journal of Hazardous Materials* **2022**, *423*, doi:10.1016/j.jhazmat.2021.127138.
2041. Kato, N.; Yamada, M.; Ojima, J.; Takaya, M. Analytical Method Using SEM-EDS for Metal Elements Present in Particulate Matter Generated from Stainless Steel Flux-Cored Arc Welding Process. *Journal of Hazardous Materials* **2022**, *424*, doi:10.1016/j.jhazmat.2021.127412.
2042. Kaur, R.; Singh, S.; Chhabra, V.A.; Marwaha, A.; Kim, K.-H.; Tripathi, S.K. A Sustainable Approach towards Utilization of Plastic Waste for an Efficient Electrode in Microbial Fuel Cell Applications. *Journal of Hazardous Materials* **2021**, *417*, doi:10.1016/j.jhazmat.2021.125992.
2043. Kocemba, I.; Szykowska, M.I.; Maćkiewicz, E.; Góralski, J.; Rogowski, J.; Pietrasik, R.; Kula, P.; Kaczmarek, Ł.; Jóźwik, K. Adsorption of Gas-Phase Elemental Mercury by Sulphonitrided Steel Sheet. Effect of Hydrogen Treatment. *Journal of Hazardous Materials* **2019**, *368*, 722–731, doi:10.1016/j.jhazmat.2019.01.102.
2044. Lagerström, M.; Yngsell, D.; Eklund, B.; Ytreberg, E. Identification of Commercial and Recreational Vessels Coated with Banned Organotin Paint through Screening

- of Tin by Portable XRF. *Journal of Hazardous Materials* **2019**, *362*, 107–114, doi:10.1016/j.jhazmat.2018.09.038.
2045. Lashgari, S.M.; Yari, H.; Mahdavian, M.; Ramezanzadeh, B.; Bahlakeh, G.; Ramezanzadeh, M. Synthesis of Graphene Oxide Nanosheets Decorated by Nanoporous Zeolite-Imidazole (ZIF-67) Based Metal-Organic Framework with Controlled-Release Corrosion Inhibitor Performance: Experimental and Detailed DFT-D Theoretical Explorations. *Journal of Hazardous Materials* **2021**, *404*, doi:10.1016/j.jhazmat.2020.124068.
2046. Lee, T.; Jung, S.; Park, Y.; Kim, T.; Wang, H.; Moon, D.; Kwon, E. Catalytic Pyrolysis of Polystyrene over Steel Slag under CO<sub>2</sub> Environment. *Journal of Hazardous Materials* **2020**, *395*, doi:10.1016/j.jhazmat.2020.122576.
2047. Lemmel, F.; Maunoury-Danger, F.; Leyval, C.; Cébron, A. Altered Fungal Communities in Contaminated Soils from French Industrial Brownfields. *Journal of Hazardous Materials* **2021**, *406*, doi:10.1016/j.jhazmat.2020.124296.
2048. Li, C.; Zheng, M.; Cao, D.; Yang, L.; Wu, J.; Yang, Y.; Liu, G. Recognition of the Molecular Characterization and Mechanisms of Heterogeneously Formed Organic Pollutants from Metallurgical Industries by FT-ICR-MS and GC/Q-TOF-MS. *Journal of Hazardous Materials* **2021**, *406*, doi:10.1016/j.jhazmat.2020.124603.
2049. Li, H.; Pinson, D.J.; Zulli, P.; Lu, L.; Longbottom, R.J.; Chew, S.J.; Monaghan, B.J.; Zhang, G. Zinc Removal from Basic Oxygen Steelmaking (BOS) Filter Cake by Sintering. *Journal of Hazardous Materials* **2020**, *385*, doi:10.1016/j.jhazmat.2019.121592.
2050. Liu, Y.; You, Y.; Li, Z.; Yang, X.; Wu, X.; Zhao, C.; Xing, Y.; Yang, R.T. NO<sub>x</sub> Removal with Efficient Recycling of NO<sub>2</sub> from Iron-Ore Sintering Flue Gas: A Novel Cyclic Adsorption Process. *Journal of Hazardous Materials* **2021**, *407*, doi:10.1016/j.jhazmat.2020.124380.
2051. Long, H.; Li, H.; Ma, P.; Zhou, Z.; Xie, H.; Yin, S.; Wang, Y.; Zhang, L.; Li, S. Effectiveness of Thermal Treatment on Pb Recovery and Cl Removal from Sintering Dust. *Journal of Hazardous Materials* **2021**, *403*, doi:10.1016/j.jhazmat.2020.123595.
2052. Long, Z.; Zhu, H.; Bing, H.; Tian, X.; Wang, Z.; Wang, X.; Wu, Y. Contamination, Sources and Health Risk of Heavy Metals in Soil and Dust from Different Functional Areas in an Industrial City of Panzhihua City, Southwest China. *Journal of Hazardous Materials* **2021**, *420*, doi:10.1016/j.jhazmat.2021.126638.
2053. Majd, M.T.; Ramezanzadeh, M.; Ramezanzadeh, B.; Bahlakeh, G. Production of an Environmentally Stable Anti-Corrosion Film Based on Esfand Seed Extract Molecules-Metal Cations: Integrated Experimental and Computer Modeling Approaches. *Journal of Hazardous Materials* **2020**, *382*, doi:10.1016/j.jhazmat.2019.121029.
2054. Mei, Y.; Dai, J.; Wang, X.; Nie, Y.; He, D. Novel Low-Temperature H<sub>2</sub>S Removal Technology by Developing Yellow Phosphorus and Phosphate Rock Slurry as Absorbent. *Journal of Hazardous Materials* **2021**, *413*,

- doi:10.1016/j.jhazmat.2021.125386.
2055. Mohamed, A.; Jacek, G.; Marian, N.; Jan, P.; Malgorzata, G. Recycle Option for Metallurgical Sludge Waste as a Partial Replacement for Natural Sand in Mortars Containing CSA Cement to Save the Environment and Natural Resources. *Journal of Hazardous Materials* **2020**, *398*, doi:10.1016/j.jhazmat.2020.123101.
2056. O'Connor, J.; Nguyen, T.B.T.; Honeyands, T.; Monaghan, B.; O'Dea, D.; Rinklebe, J.; Vinu, A.; Hoang, S.A.; Singh, G.; Kirkham, M.B.; et al. Production, Characterisation, Utilisation, and Beneficial Soil Application of Steel Slag: A Review. *Journal of Hazardous Materials* **2021**, *419*, doi:10.1016/j.jhazmat.2021.126478.
2057. Pandiyaraj, K.N.; Vasu, D.; Ghobeira, R.; Tabaei, P.S.E.; De Geyter, N.; Morent, R.; Pichumani, M.; Padmanabhanan, P.V.A.; Deshmukh, R.R. Dye Wastewater Degradation by the Synergetic Effect of an Atmospheric Pressure Plasma Treatment and the Photocatalytic Activity of Plasma-Functionalized Cu-TiO<sub>2</sub> Nanoparticles. *Journal of Hazardous Materials* **2021**, *405*, doi:10.1016/j.jhazmat.2020.124264.
2058. Pang, Y.; Zang, X.; Li, H.; Liu, J.; Chang, Q.; Zhang, S.; Wang, C.; Wang, Z. Solid-Phase Microextraction of Organophosphorous Pesticides from Food Samples with a Nitrogen-Doped Porous Carbon Derived from g-C<sub>3</sub>N<sub>4</sub> Templated MOF as the Fiber Coating. *Journal of Hazardous Materials* **2020**, *384*, doi:10.1016/j.jhazmat.2019.121430.
2059. Petranikova, M.; Ssenteza, V.; Lousada, C.M.; Ebin, B.; Tunsu, C. Novel Process for Decontamination and Additional Valorization of Steel Making Dust Processing Using Two-Step Correlative Leaching. *Journal of Hazardous Materials* **2020**, *384*, doi:10.1016/j.jhazmat.2019.121442.
2060. Rathi, B.S.; Kumar, P.S.; Ponprasath, R.; Rohan, K.; Jahnavi, N. An Effective Separation of Toxic Arsenic from Aquatic Environment Using Electrochemical Ion Exchange Process. *Journal of Hazardous Materials* **2021**, *412*, doi:10.1016/j.jhazmat.2021.125240.
2061. Ravuru, S.S.; Jana, A.; De, S. Synthesis of NiAl- Layered Double Hydroxide with Nitrate Intercalation: Application in Cyanide Removal from Steel Industry Effluent. *Journal of Hazardous Materials* **2019**, *373*, 791–800, doi:10.1016/j.jhazmat.2019.03.122.
2062. Samiee, R.; Ramezanzadeh, B.; Mahdavian, M.; Alibakhshi, E.; Bahlakeh, G. Designing a Non-Hazardous Nano-Carrier Based on Graphene Oxide@Polyaniline-Praseodymium (III) for Fabrication of the Active/Passive Anti-Corrosion Coating. *Journal of Hazardous Materials* **2020**, *398*, doi:10.1016/j.jhazmat.2020.123136.
2063. Scattolin, M.; Peuble, S.; Pereira, F.; Paran, F.; Moutte, J.; Menad, N.; Faure, O. Aided-Phytostabilization of Steel Slag Dumps: The Key-Role of PH Adjustment in Decreasing Chromium Toxicity and Improving Manganese, Phosphorus and Zinc Phytoavailability. *Journal of Hazardous Materials* **2021**, *405*,

- doi:10.1016/j.jhazmat.2020.124225.
2064. Sheven, D.G.; Pervukhin, V.V. Acceleration of the Thermal Degradation of PETN in the Microdroplets Flow Reactor. *Journal of Hazardous Materials* **2021**, *420*, doi:10.1016/j.jhazmat.2021.126670.
2065. Shi, Y.; Huang, J.; Chen, L.; Wang, S.; Xu, J.; Zhu, F.; Cui, S.; Zheng, J.; Ouyang, G. MOF-74/Polystyrene-Derived Ni-Doped Hierarchical Porous Carbon for Structure-Oriented Extraction of Polycyclic Aromatic Hydrocarbons and Their Metabolites from Human Biofluids. *Journal of Hazardous Materials* **2022**, *424*, doi:10.1016/j.jhazmat.2021.127465.
2066. Souza, I.C.; Morozesk, M.; Azevedo, V.C.; Mendes, V.A.S.; Duarte, I.D.; Rocha, L.D.; Matsumoto, S.T.; Elliott, M.; Baroni, M.V.; Wunderlin, D.A.; et al. Trophic Transfer of Emerging Metallic Contaminants in a Neotropical Mangrove Ecosystem Food Web. *Journal of Hazardous Materials* **2021**, *408*, doi:10.1016/j.jhazmat.2020.124424.
2067. Sun, L.; Wu, J.; Wang, J.; Yang, Y.; Xu, M.; Liu, J.; Yang, C.; Cai, Y.; He, H.; Du, Y.; et al. In-Situ Constructing Nanostructured Magnesium Ferrite on Steel Slag for Cr(VI) Photoreduction. *Journal of Hazardous Materials* **2022**, *422*, doi:10.1016/j.jhazmat.2021.126951.
2068. Tang, P.; Xuan, D.; Cheng, H.; Poon, C.; Tsang, D. Use of CO<sub>2</sub> Curing to Enhance the Properties of Cold Bonded Lightweight Aggregates (CBLAs) Produced with Concrete Slurry Waste (CSW) and Fine Incineration Bottom Ash (IBA). *Journal of Hazardous Materials* **2020**, *381*, doi:10.1016/j.jhazmat.2019.120951.
2069. Tarafdar, A.; Choi, S.-H.; Kwon, J.-H. Differential Staining Lowers the False Positive Detection in a Novel Volumetric Measurement Technique of Microplastics. *Journal of Hazardous Materials* **2022**, *432*, doi:10.1016/j.jhazmat.2022.128755.
2070. Teran, K.; Žibret, G.; Fanetti, M. Impact of Urbanization and Steel Mill Emissions on Elemental Composition of Street Dust and Corresponding Particle Characterization. *Journal of Hazardous Materials* **2020**, *384*, doi:10.1016/j.jhazmat.2019.120963.
2071. Wang, S.; Chen, G.; Zhang, L. Parameter Inversion and Microscopic Damage Research on Discrete Element Model of Cement-Stabilized Steel Slag Based on 3D Scanning Technology. *Journal of Hazardous Materials* **2022**, *424*, doi:10.1016/j.jhazmat.2021.127402.
2072. Wang, Y.; Liu, Z.; Zhang, J.; Mao, R.; Zhang, Y. Advanced Converter Sludge Utilization Technologies for the Recovery of Valuable Elements: A Review. *Journal of Hazardous Materials* **2020**, *381*, doi:10.1016/j.jhazmat.2019.120902.
2073. Xie, Y.; Gu, Y.-H.; Meng, J.; Yan, X.; Chen, Y.; Guo, X.-J.; Lang, W.-Z. Ultrafast Separation of Oil/Water Mixtures with Layered Double Hydroxide Coated Stainless Steel Meshes (LDH-SSMs). *Journal of Hazardous Materials* **2020**, *398*, doi:10.1016/j.jhazmat.2020.122862.
2074. Xue, Y.; Wang, L.; Liu, S.; Huang, Y.; Chen, L.; Cui, L.; Cao, J. Upward Trend and

- Formation of Surface Ozone in the Guanzhong Basin, Northwest China. *Journal of Hazardous Materials* **2022**, *427*, doi:10.1016/j.jhazmat.2021.128175.
2075. Yang, L.; Wei, T.; Li, S.; Lv, Y.; Miki, T.; Yang, L.; Nagasaka, T. Immobilization Persistence of Cu, Cr, Pb, Zn Ions by the Addition of Steel Slag in Acidic Contaminated Mine Soil. *Journal of Hazardous Materials* **2021**, *412*, doi:10.1016/j.jhazmat.2021.125176.
2076. Yu, X.; Wang, Y.; Lu, S. Tracking the Magnetic Carriers of Heavy Metals in Contaminated Soils Based on X-Ray Microprobe Techniques and Wavelet Transformation. *Journal of Hazardous Materials* **2020**, *382*, doi:10.1016/j.jhazmat.2019.121114.
2077. Zheng, M.; Wang, J.; Fu, D.; Ren, B.; Song, X.; Kan, K.; Zhang, X. Anchored Growth of Highly Dispersed LDHs Nanosheets on Expanded Graphite for Fluoride Adsorption Properties and Mechanism. *Journal of Hazardous Materials* **2023**, *442*, doi:10.1016/j.jhazmat.2022.130068.
2078. Zuo, J.; Zhou, Y.; Chen, Z.; Zhao, T.; Tan, Q.; Zhou, C.; Zeng, X.; Xu, S.; Cheng, J.; Wen, X.; et al. A Superwetting Stainless Steel Mesh with Janus Surface Charges for Efficient Emulsion Separation. *Journal of Hazardous Materials* **2022**, *430*, doi:10.1016/j.jhazmat.2022.128378.
2079. Zupančič, N.; Miler, M.; Ašler, A.; Pompe, N.; Jarc, S. Contamination of Children's Sandboxes with Potentially Toxic Elements in Historically Polluted Industrial City. *Journal of Hazardous Materials* **2021**, *412*, doi:10.1016/j.jhazmat.2021.125275.
2080. Naidu, T.S.; Van Dyk, L.D.; Sheridan, C.M.; Grubb, D.G. Sugar and Steel By-Product Utilization in Acid Mine Drainage Remediation. *Journal of Hazardous, Toxic, and Radioactive Waste* **2020**, *24*, doi:10.1061/(ASCE)HZ.2153-5515.0000472.
2081. Sahoo, P.; Joseph, J. Radioactive Hazards in Utilization of Industrial By-Products: Comprehensive Review. *Journal of Hazardous, Toxic, and Radioactive Waste* **2021**, *25*, doi:10.1061/(ASCE)HZ.2153-5515.0000612.
2082. Yubonmhat, K.; Akharawutchayanon, T.; Nuanjan, P.; Issarapanacheewin, S.; Katekaew, W.; Prasertchiewchan, N. Progress and Challenges of Radioactive Waste Management in Thailand. *Journal of Hazardous, Toxic, and Radioactive Waste* **2022**, *26*, doi:10.1061/(ASCE)HZ.2153-5515.0000693.
2083. Fardi, A.; Karkhaneh, M.; Heidari, H.; Mohammadbeigi, A.; Soltanzadeh, A. Analysis of the Safety Effectiveness of Methane Gas Valve Pits: A Case Study in the Steel Industry Based on Hazardous Areas Classification. *Journal of Health and Safety at Work* **2022**, *12*, 418–431.
2084. Ylönen, M.; Saarenrinne, P.; Miettinen, J.; Franc, J.-P.; Fivel, M.; Laakso, J. Estimation of Cavitation Pit Distributions by Acoustic Emission. *Journal of Hydraulic Engineering* **2020**, *146*, doi:10.1061/(ASCE)HY.1943-7900.0001686.
2085. Fér, M.; Kodešová, R.; Kalkušová, B.; Klement, A.; Nikodem, A. An Empirical Model for Describing the Influence of Water Content and Concentration of Sulfamethoxazole (Antibiotic) in Soil on the Total Net CO<sub>2</sub> efflux. *Journal of Hydrology and Hydromechanics* **2020**, *68*, 351–358, doi:10.2478/johh-2020-0031.

2086. Setiawan, I.; Morgan, L.; Doscher, C.; Ng, K.; Bosserelle, A. Mapping Shallow Groundwater Salinity in a Coastal Urban Setting to Assess Exposure of Municipal Assets. *Journal of Hydrology: Regional Studies* **2022**, *40*, doi:10.1016/j.ejrh.2022.100999.
2087. Aguilar-Hernandez, G.A.; Deetman, S.; Merciai, S.; Rodrigues, J.F.D.; Tukker, A. Global Distribution of Material Inflows to In-Use Stocks in 2011 and Its Implications for a Circularity Transition. *Journal of Industrial Ecology* **2021**, *25*, 1447–1461, doi:10.1111/jiec.13179.
2088. Aoki-Suzuki, C.; Dente, S.M.R.; Tanaka, D.; Kayo, C.; Murakami, S.; Fujii, C.; Tahara, K.; Hashimoto, S. Total Environmental Impacts of Japanese Material Production. *Journal of Industrial Ecology* **2021**, *25*, 1474–1485, doi:10.1111/jiec.13152.
2089. Axelson, M.; Oberthür, S.; Nilsson, L.J. Emission Reduction Strategies in the EU Steel Industry: Implications for Business Model Innovation. *Journal of Industrial Ecology* **2021**, *25*, 390–402, doi:10.1111/jiec.13124.
2090. Baustert, P.; Igos, E.; Schaubroeck, T.; Chion, L.; Mendoza Beltran, A.; Stehfest, E.; van Vuuren, D.; Biemans, H.; Benetto, E. Integration of Future Water Scarcity and Electricity Supply into Prospective LCA: Application to the Assessment of Water Desalination for the Steel Industry. *Journal of Industrial Ecology* **2022**, *26*, 1182–1194, doi:10.1111/jiec.13272.
2091. Blume, N.; Becker, M.; Turek, T.; Minke, C. Life Cycle Assessment of an Industrial-Scale Vanadium Flow Battery. *Journal of Industrial Ecology* **2022**, *26*, 1796–1808, doi:10.1111/jiec.13328.
2092. Carmona, L.G.; Whiting, K.; Haberl, H.; Sousa, T. The Use of Steel in the United Kingdom's Transport Sector: A Stock–Flow–Service Nexus Case Study. *Journal of Industrial Ecology* **2021**, *25*, 125–143, doi:10.1111/jiec.13055.
2093. Ciacci, L.; de Matos, C.; Reck, B.; Wittmer, D.; Bernardi, E.; Mathieux, F.; Passarini, F. Material System Analysis: Characterization of Flows, Stocks, and Performance Indicators of Manganese, Nickel, and Natural Graphite in the EU, 2012–2016. *Journal of Industrial Ecology* **2022**, *26*, 1247–1260, doi:10.1111/jiec.13226.
2094. Cooper, D.R.; Ryan, N.A.; Syndergaard, K.; Zhu, Y. The Potential for Material Circularity and Independence in the U.S. Steel Sector. *Journal of Industrial Ecology* **2020**, *24*, 748–762, doi:10.1111/jiec.12971.
2095. Dunant, C.F.; Shah, T.; Drewniok, M.P.; Craglia, M.; Cullen, J.M. A New Method to Estimate the Lifetime of Long-Life Product Categories. *Journal of Industrial Ecology* **2021**, *25*, 321–332, doi:10.1111/jiec.13093.
2096. Fu, C.; Zhang, Y.; Deng, T.; Daigo, I. The Evolution of Material Stock Research: From Exploring to Rising to Hot Studies. *Journal of Industrial Ecology* **2022**, *26*, 462–476, doi:10.1111/jiec.13195.
2097. Furberg, A.; Arvidsson, R.; Molander, S. A Practice-Based Framework for Defining Functional Units in Comparative Life Cycle Assessments of Materials. *Journal of Industrial Ecology* **2022**, *26*, 718–730, doi:10.1111/jiec.13218.
2098. Gao, Z.; Geng, Y.; Zeng, X.; Tian, X.; Yao, T.; Song, X.; Su, C. Evolution of the

- Anthropogenic Chromium Cycle in China. *Journal of Industrial Ecology* **2022**, *26*, 592–608, doi:10.1111/jiec.13207.
2099. Gielen, D.; Saygin, D.; Taibi, E.; Birat, J.-P. Renewables-Based Decarbonization and Relocation of Iron and Steel Making: A Case Study. *Journal of Industrial Ecology* **2020**, *24*, 1113–1125, doi:10.1111/jiec.12997.
2100. Gontia, P.; Thuvander, L.; Ebrahimi, B.; Vinas, V.; Rosado, L.; Wallbaum, H. Spatial Analysis of Urban Material Stock with Clustering Algorithms: A Northern European Case Study. *Journal of Industrial Ecology* **2019**, *23*, 1328–1343, doi:10.1111/jiec.12939.
2101. Guo, Y.; Qie, J.; Zhang, C.; Yang, Y. Material Flow Analysis of Zinc during the Manufacturing Process in Integrated Steel Mills in China. *Journal of Industrial Ecology* **2021**, *25*, 1009–1020, doi:10.1111/jiec.13096.
2102. Hart, J.; D'Amico, B.; Pomponi, F. Whole-Life Embodied Carbon in Multistory Buildings: Steel, Concrete and Timber Structures. *Journal of Industrial Ecology* **2021**, *25*, 403–418, doi:10.1111/jiec.13139.
2103. Helbig, C.; Kondo, Y.; Nakamura, S. Simultaneously Tracing the Fate of Seven Metals at a Global Level with MaTrace-Multi. *Journal of Industrial Ecology* **2022**, *26*, 923–936, doi:10.1111/jiec.13219.
2104. Hua, N.; Kelly, J.; Lewis, G.; Keoleian, G. Regional Analysis of Aluminum and Steel Flows into the American Automotive Industry. *Journal of Industrial Ecology* **2022**, *26*, 1318–1332, doi:10.1111/jiec.13268.
2105. Kayo, C.; Dente, S.M.R.; Aoki-Suzuki, C.; Tanaka, D.; Murakami, S.; Hashimoto, S. Environmental Impact Assessment of Wood Use in Japan through 2050 Using Material Flow Analysis and Life Cycle Assessment. *Journal of Industrial Ecology* **2019**, *23*, 635–648, doi:10.1111/jiec.12766.
2106. Klose, S.; Pauliuk, S. Quantifying Longevity and Circularity of Copper for Different Resource Efficiency Policies at the Material and Product Levels. *Journal of Industrial Ecology* **2021**, *25*, 979–993, doi:10.1111/jiec.13092.
2107. Lu, X.; Ohno, H.; Takeda, O.; Miki, T.; Sasaki, Y.; Zhu, H.; Nagasaka, T. Toward an Efficient Recycling System: Evaluating Recyclability of End-of-Life Stainless Steels by Considering Elements Distribution during a Remelting Process. *Journal of Industrial Ecology* **2022**, *26*, 1701–1713, doi:10.1111/jiec.13304.
2108. Lu, Y.; Schandl, H. Do Sectoral Material Efficiency Improvements Add up to Greenhouse Gas Emissions Reduction on an Economy-Wide Level? *Journal of Industrial Ecology* **2021**, *25*, 523–536, doi:10.1111/jiec.13138.
2109. Maki, S.; Ohnishi, S.; Fujii, M.; Goto, N.; Sun, L. Using Waste to Supply Steam for Industry Transition: Selection of Target Industries through Economic Evaluation and Statistical Analysis. *Journal of Industrial Ecology* **2022**, *26*, 1475–1486, doi:10.1111/jiec.13270.
2110. Matos, C.; Mathieux, F.; Ciacci, L.; Lundhaug, M.; Leon, M.; Muller, D.; Dewulf, J.; Georgitzikis, K.; Huisman, J. Material System Analysis: A Novel Multilayer System Approach to Correlate EU Flows and Stocks of Li-Ion Batteries and Their



- Raw Materials. *Journal of Industrial Ecology* **2022**, *26*, 1261–1276, doi:10.1111/jiec.13244.
2111. Mesta, C.; Kahhat, R.; Santa-Cruz, S. Geospatial Characterization of Material Stock in the Residential Sector of a Latin-American City. *Journal of Industrial Ecology* **2019**, *23*, 280–291, doi:10.1111/jiec.12723.
2112. Myers, R.; Fishman, T.; Reck, B.; Graedel, T. Unified Materials Information System (UMIS): An Integrated Material Stocks and Flows Data Structure. *Journal of Industrial Ecology* **2019**, *23*, 222–240, doi:10.1111/jiec.12730.
2113. Panasiuk, D.; Daigo, I.; Hoshino, T.; Hayashi, H.; Yamasue, E.; Tran, D.H.; Sprecher, B.; Shi, F.; Shatokha, V. International Comparison of Impurities Mixing and Accumulation in Steel Scrap. *Journal of Industrial Ecology* **2022**, *26*, 1040–1050, doi:10.1111/jiec.13246.
2114. Pauliuk, S.; Fishman, T.; Heeren, N.; Berrill, P.; Tu, Q.; Wolfram, P.; Hertwich, E. Linking Service Provision to Material Cycles: A New Framework for Studying the Resource Efficiency-Climate Change (RECC) Nexus. *Journal of Industrial Ecology* **2021**, *25*, 274–287, doi:10.1111/jiec.13023.
2115. Pauliuk, S.; Heeren, N. ODYM-An Open Software Framework for Studying Dynamic Material Systems: Principles, Implementation, and Data Structures. *Journal of Industrial Ecology* **2020**, *24*, 446–458, doi:10.1111/jiec.12952.
2116. Pauliuk, S.; Heeren, N. Material Efficiency and Its Contribution to Climate Change Mitigation in Germany: A Deep Decarbonization Scenario Analysis until 2060. *Journal of Industrial Ecology* **2021**, *25*, 494–510, doi:10.1111/jiec.13091.
2117. Pedneault, J.; Majeau-Bettez, G.; Pauliuk, S.; Margni, M. Sector-Specific Scenarios for Future Stocks and Flows of Aluminum: An Analysis Based on Shared Socioeconomic Pathways. *Journal of Industrial Ecology* **2022**, *26*, 1728–1746, doi:10.1111/jiec.13321.
2118. Sabbaghi, M.; Cade, W.; Olson, W.; Behdad, S. The Global Flow of Hard Disk Drives: Quantifying the Concept of Value Leakage in E-Waste Recovery Systems. *Journal of Industrial Ecology* **2019**, *23*, 560–573, doi:10.1111/jiec.12765.
2119. Symmes, R.; Fishman, T.; Telesford, J.N.; Singh, S.J.; Tan, S.-Y.; De Kroon, K. The Weight of Islands: Leveraging Grenada’s Material Stocks to Adapt to Climate Change. *Journal of Industrial Ecology* **2020**, *24*, 369–382, doi:10.1111/jiec.12853.
2120. Tu, Q.; Hertwich, E. A Mechanistic Model to Link Technical Specifications of Vehicle End-of-Life Treatment with the Potential of Closed-Loop Recycling of Post-Consumer Scrap Alloys. *Journal of Industrial Ecology* **2022**, *26*, 704–717, doi:10.1111/jiec.13223.
2121. Van der Voet, E.; Van Oers, L.; Verboon, M.; Kuipers, K. Environmental Implications of Future Demand Scenarios for Metals: Methodology and Application to the Case of Seven Major Metals. *Journal of Industrial Ecology* **2019**, *23*, 141–155, doi:10.1111/jiec.12722.
2122. Ventura, A.; Ta, V.; Kiese, T.; Bonnet, S. Design of Concrete: Setting a New Basis for Improving Both Durability and Environmental Performance. *Journal of*

- Industrial Ecology* **2021**, *25*, 233–247, doi:10.1111/jiec.13059.
2123. Wieland, H.; Lenzen, M.; Geschke, A.; Fry, J.; Wiedenhofer, D.; Eisenmenger, N.; Schenk, J.; Giljum, S. The PIOLab: Building Global Physical Input–Output Tables in a Virtual Laboratory. *Journal of Industrial Ecology* **2022**, *26*, 683–703, doi:10.1111/jiec.13215.
2124. Wolfram, P.; Tu, Q.; Heeren, N.; Pauliuk, S.; Hertwich, E. Material Efficiency and Climate Change Mitigation of Passenger Vehicles. *Journal of Industrial Ecology* **2021**, *25*, 511–522, doi:10.1111/jiec.13067.
2125. Yang, D.; Dang, M.; Guo, J.; Sun, L.; Zhang, R.; Han, F.; Shi, F.; Liu, Q.; Tanikawa, H. Spatial–Temporal Dynamics of the Built Environment toward Sustainability: A Material Stock and Flow Analysis in Chinese New and Old Urban Areas. *Journal of Industrial Ecology* **2022**, doi:10.1111/jiec.13335.
2126. Zhang, Q.; Kennedy, C.; Wang, T.; Wei, W.; Li, J.; Shi, L. Transforming the Coal and Steel Nexus for China’s Eco-Civilization: Interplay between Rail and Energy Infrastructure. *Journal of Industrial Ecology* **2020**, *24*, 1352–1363, doi:10.1111/jiec.13040.
2127. Zhang, Q.; Xiang, T.; Zhang, W.; Wang, H.; An, J.; Li, X.; Xue, B. Co-Benefits Analysis of Industrial Symbiosis in China’s Key Industries: Case of Steel, Cement, and Power Industries. *Journal of Industrial Ecology* **2022**, *26*, 1714–1727, doi:10.1111/jiec.13320.
2128. Zhang, R.; Guo, J.; Yang, D.; Shirakawa, H.; Shi, F.; Tanikawa, H. What Matters Most to the Material Intensity Coefficient of Buildings? Random Forest-Based Evidence from China. *Journal of Industrial Ecology* **2022**, *26*, 1809–1823, doi:10.1111/jiec.13332.
2129. Zhou, S.; Gu, A.; Tong, Q.; Guo, Y.; Wei, X. Multi-Scenario Simulation on Reducing CO<sub>2</sub> Emissions from China’s Major Manufacturing Industries Targeting 2060. *Journal of Industrial Ecology* **2022**, *26*, 850–861, doi:10.1111/jiec.13233.
2130. Ituen, E.; Yuanhua, L.; Singh, A.; Li, R. Chemical Modification of Waste Allium Cepa Peels to Cu-Complex Composite and Application as Eco Environmental Oilfield Anticorrosion Additive. *Journal of King Saud University - Engineering Sciences* **2021**, *33*, 375–385, doi:10.1016/j.jksues.2020.05.005.
2131. Komariah, L.N.; Arita, S.; Prianda, B.E.; Dewi, T.K. Technical Assessment of Biodiesel Storage Tank; A Corrosion Case Study. *Journal of King Saud University - Engineering Sciences* **2021**, doi:10.1016/j.jksues.2021.03.016.
2132. Nguyen, H.-P.; Pham, V.-D. Single Objective Optimization of Die- Sinking Electrical Discharge Machining with Low Frequency Vibration Assigned on Workpiece by Taguchi Method. *Journal of King Saud University - Engineering Sciences* **2021**, *33*, 37–42, doi:10.1016/j.jksues.2019.11.001.
2133. Zameeruddin, M.; Sangle, K.K. Damage Assessment of Reinforced Concrete Moment Resisting Frames Using Performance-Based Seismic Evaluation Procedure. *Journal of King Saud University - Engineering Sciences* **2021**, *33*, 227–239, doi:10.1016/j.jksues.2020.04.010.

2134. Hwang, I. Estimation of Source Apportionment for PM<sub>2.5</sub> Data of Air Pollution Monitoring Site in Pohang Using the EPA-PMF Model. *Journal of Korean Society for Atmospheric Environment* **2022**, *38*, 354–374, doi:10.5572/KOSAE.2022.38.3.354.
2135. Kim, J.B.; Yoon, S.H.; Lee, S.S.; Kim, K.H.; Noh, S.; Bae, G.-N. Spatial and Temporal Distributions of PM<sub>10</sub> and PM<sub>2.5</sub> Concentrations in Chungcheongnam-Do. *Journal of Korean Society for Atmospheric Environment* **2020**, *36*, 464–481, doi:10.5572/KOSAE.2020.36.4.464.
2136. Seonyeop Lee, H.-S.H.; Kim, C.H.; Hwang, E.Y.; Yoon, S.H.; Lee, S.S.; Noh, S.; Kim, J.B. Characteristic Analysis of Urban Air Pollution of Northwest Cities in ChungNam. *Journal of Korean Society for Atmospheric Environment* **2021**, *37*, 561–577, doi:10.5572/KOSAE.2021.37.4.561.
2137. Li, C.; Yuan, Y.; Amyotte, P.; Xiao, M.; Zheng, W.; Bu, Y.; Yuan, C.; Li, G. Friction Spark Generation and Incendivity of Several Metal Alloys. *Journal of Loss Prevention in the Process Industries* **2021**, *70*, doi:10.1016/j.jlp.2021.104406.
2138. Singh, K.; Maiti, J.; Roychowdhury, S. A Data-Driven Penalty-Reward Methodology for Performance Assessment of Risk Control Systems. *Journal of Loss Prevention in the Process Industries* **2022**, *77*, doi:10.1016/j.jlp.2022.104756.
2139. Amiri, N.; Shaterabadi, M.; Kashyzadeh, K.R.; Chizari, M. A Comprehensive Review on Design, Monitoring, and Failure in Fixed Offshore Platforms. *Journal of Marine Science and Engineering* **2021**, *9*, doi:10.3390/jmse9121349.
2140. Apolonia, M.; Simas, T. Life Cycle Assessment of an Oscillating Wave Surge Energy Converter. *Journal of Marine Science and Engineering* **2021**, *9*, 1–17, doi:10.3390/JMSE9020206.
2141. Kim, D.-S.; Lee, H.-K.; Seong, W.-J.; Lee, K.-H.; Bang, H.-S. Experimental Study on Laser-Mig Hybrid Welding of Thick High-Mn Steel Plate for Cryogenic Tank Production. *Journal of Marine Science and Engineering* **2021**, *9*, doi:10.3390/jmse9060604.
2142. Palomba, G.; Scattareggia Marchese, S.; Crupi, V.; Garbatov, Y. Cost, Energy Efficiency and Carbon Footprint Analysis of Hybrid Light-Weight Bulk Carrier. *Journal of Marine Science and Engineering* **2022**, *10*, doi:10.3390/jmse10070957.
2143. Agarwalla, H.; Senapati, R.N.; Das, T.B. Investigation on Mercury Flow and Emission in Integrated Primary Iron Production Process. *Journal of Material Cycles and Waste Management* **2022**, doi:10.1007/s10163-022-01510-w.
2144. Arora, N.; Bakshi, S.K.; Bhattacharjya, S. Framework for Sustainable Management of End-of-Life Vehicles Management in India. *Journal of Material Cycles and Waste Management* **2019**, *21*, 79–97, doi:10.1007/s10163-018-0771-0.
2145. Aryal, P.; Karki, S.; Choi, Y.; Kim, H.J.; Kim, Y.; Milyutin, V.; Gileva, O.; Park, H.K.; Shin, K.A. Rapid Simultaneous Recovery and Purification of Calcium and Molybdenum from Calcium Molybdate-Based Crystal Waste. *Journal of Material Cycles and Waste Management* **2019**, *21*, 1384–1390, doi:10.1007/s10163-019-00888-4.
2146. Bhogayata, A.; Arora, N. Utilization of Metalized Plastic Waste of Food Packaging Articles in Geopolymer Concrete. *Journal of Material Cycles and Waste Management*

- 2019, 21, 1014–1026, doi:10.1007/s10163-019-00859-9.
2147. Biganzoli, L.; Rigamonti, L.; Grosso, M. LCA Evaluation of Packaging Re-Use: The Steel Drums Case Study. *Journal of Material Cycles and Waste Management* **2019**, 21, 67–78, doi:10.1007/s10163-018-00817-x.
2148. Fang, H.-Y.; Liu, F.-L.; Yang, J.-H. High-Quality Coarse Aggregate Recycling from Waste Concrete by Impact Crushing. *Journal of Material Cycles and Waste Management* **2020**, 22, 887–896, doi:10.1007/s10163-020-00984-w.
2149. Kursula, K.; Perumal, P.; Ohenoja, K.; Illikainen, M. Production of Artificial Aggregates by Granulation and Carbonation of Recycled Concrete Fines. *Journal of Material Cycles and Waste Management* **2022**, doi:10.1007/s10163-022-01457-y.
2150. Martins, T.R.; Bertuol, D.A.; Tanabe, E.H. Recovery of Metals and Polymers from Coaxial Cables Using Different Configurations of Electrostatic Separators. *Journal of Material Cycles and Waste Management* **2022**, 24, 633–641, doi:10.1007/s10163-021-01346-w.
2151. Mathews, G.; Moazeni, F.; Smolinski, R. Treatment of Reclaimed Municipal Solid Waste Incinerator Sands Using Alkaline Treatments with Mechanical Agitation. *Journal of Material Cycles and Waste Management* **2020**, 22, 1630–1638, doi:10.1007/s10163-020-01053-y.
2152. Palod, R.; Deo, S.V.; Ramtekkar, G.D. Utilization of Waste from Steel and Iron Industry as Replacement of Cement in Mortars. *Journal of Material Cycles and Waste Management* **2019**, 21, 1361–1375, doi:10.1007/s10163-019-00889-3.
2153. Patnaik, B.; Bhojaraju, C.; Mousavi, S.S. Experimental Study on Residual Properties of Thermally Damaged Steel Fiber-Reinforced Concrete Containing Copper Slag as Fine Aggregate. *Journal of Material Cycles and Waste Management* **2020**, 22, 801–815, doi:10.1007/s10163-020-00972-0.
2154. Pratti, G.M.R.; Detoni, I.R.; de Souza Resende, G.P.; Mansur, M.B.; Lemos, L.R.; da Silva, G.L.R. Use of Fluff in a Coking Coal Blend in a Pilot Scale. *Journal of Material Cycles and Waste Management* **2022**, 24, 702–711, doi:10.1007/s10163-022-01352-6.
2155. Roque, A.J.; da Silva, P.F.; de Almeida, R.P.M. Recycling of Crushed Concrete and Steel Slag in Drainage Structures of Geotechnical Works and Road Pavements. *Journal of Material Cycles and Waste Management* **2022**, doi:10.1007/s10163-022-01486-7.
2156. Roque, A.J.; Rodrigues, G.M.; da Silva, P.F. Re-Cycling of Construction and Demolition Waste and Steel Slag: Characterization of the Durability. *Journal of Material Cycles and Waste Management* **2020**, 22, 1699–1711, doi:10.1007/s10163-020-01061-y.
2157. Schumacher, A.G.; Gomes, G.J.C.; Schneider, D.S.G.; Pires, P.J.M.; Gomes, R.G.S. Blending Linz–Donawitz and Blast Furnace Slags with the Kambara Reactor Byproduct to Improve Their Reuse in Roadworks. *Journal of Material Cycles and Waste Management* **2022**, doi:10.1007/s10163-022-01504-8.
2158. Taheriyoun, M.; Memaripour, A.; Nazari-Sharabian, M. Using Recycled Chemical Sludge as a Coagulant Aid in Chemical Wastewater Treatment in Mobarakeh Steel

- Complex. *Journal of Material Cycles and Waste Management* **2020**, *22*, 745–756, doi:10.1007/s10163-019-00966-7.
2159. Wang, J.; Xie, J.; He, J.; Sun, M.; Yang, J.; Li, L. Combined Use of Silica Fume and Steel Fibre to Improve Fracture Properties of Recycled Aggregate Concrete Exposed to Elevated Temperature. *Journal of Material Cycles and Waste Management* **2020**, *22*, 862–877, doi:10.1007/s10163-020-00990-y.
2160. Garg, S.; Li, M.; Weber, A.Z.; Ge, L.; Li, L.; Rudolph, V.; Wang, G.; Rufford, T.E. Advances and Challenges in Electrochemical CO<sub>2</sub> Reduction Processes: An Engineering and Design Perspective Looking beyond New Catalyst Materials. *Journal of Materials Chemistry A* **2020**, *8*, 1511–1544, doi:10.1039/c9ta13298h.
2161. Weng, W.; Zhou, J.; Gu, D.; Xiao, W. Thermoelectrochemical Formation of Fe/Fe<sub>3</sub>C@hollow N-Doped Carbon in Molten Salts for Enhanced Catalysis. *Journal of Materials Chemistry A* **2020**, *8*, 4800–4806, doi:10.1039/d0ta00565g.
2162. Tiwari, M.S.; Uttarwar, M. Sensor Based Management Information System for Dumpers for Indian Mines. *Journal of Mines, Metals and Fuels* **2020**, *68*, 81–84.
2163. Wang, W.; Yang, K.; He, Y.; Wang, B.; Gao, F.; Pan, Y. A Study on Collision Warning of Gas Wells in Coal-Gas Cross Mining Area. *Journal of Mining Science and Technology* **2022**, *7*, 490–497, doi:10.19606/j.cnki.jmst.2022.04.011.
2164. Li, C.; Zhang, R.-T.; Zhu, J.-B.; Liu, Z.-J.; Lu, B.; Wang, B.; Jiang, Y.-Z.; Liu, J.-S.; Zeng, P. Model Test of the Stability Degradation of a Prestressed Anchored Rock Slope System in a Corrosive Environment. *Journal of Mountain Science* **2020**, *17*, 2548–2561, doi:10.1007/s11629-019-5835-7.
2165. Attarchi, M.; Brenna, A.; Ormellese, M. Cathodic Protection and DC Non-Stationary Anodic Interference. *Journal of Natural Gas Science and Engineering* **2020**, *82*, doi:10.1016/j.jngse.2020.103497.
2166. Li, H.; Niu, R.; Li, W.; Lu, H.; Cairney, J.; Chen, Y.-S. Hydrogen in Pipeline Steels: Recent Advances in Characterization and Embrittlement Mitigation. *Journal of Natural Gas Science and Engineering* **2022**, *105*, doi:10.1016/j.jngse.2022.104709.
2167. Sasaki, T.; Zhang, S.; Soga, K.; Luo, L.; Freifeld, B.; Kitayama, Y.; Kawaguchi, K.; Sugiyama, H. Distributed Fiber Optic Strain Sensing of Bending Deformation of a Well Mockup in the Laboratory. *Journal of Natural Gas Science and Engineering* **2021**, *96*, doi:10.1016/j.jngse.2021.104309.
2168. Wasim, M.; Djukic, M.B. External Corrosion of Oil and Gas Pipelines: A Review of Failure Mechanisms and Predictive Preventions. *Journal of Natural Gas Science and Engineering* **2022**, *100*, doi:10.1016/j.jngse.2022.104467.
2169. Witek, M.; Uilhoorn, F.E. Influence of Gas Transmission Network Failure on Security of Supply. *Journal of Natural Gas Science and Engineering* **2021**, *90*, doi:10.1016/j.jngse.2021.103877.
2170. Wu, H.; Lan, G.; Qiu, H.; Tan, P.; Zhang, Q.; Yue, M.; Xu, B.; Wang, S. Temporal Changes of Bacterial and Archaeal Community Structure and Their Corrosion Mechanisms in Flowback and Produced Water from Shale Gas Well. *Journal of Natural Gas Science and Engineering* **2022**, *104*, doi:10.1016/j.jngse.2022.104663.

2171. Yang, S.; Zhang, L.; Fan, J.; Sun, B. Experimental Study on Erosion Behavior of Fracturing Pipeline Involving Tensile Stress and Erosion Prediction Using Random Forest Regression. *Journal of Natural Gas Science and Engineering* **2021**, *87*, doi:10.1016/j.jngse.2020.103760.
2172. Karthikeyan, M.; Vijayachitra, S. A Novel Experimental Study and Analysis of Electrocoagulation Process for Textile Wastewater Treatment Using Various Sensors with Integration of IoT Monitoring System. *Journal of New Materials for Electrochemical Systems* **2021**, *24*, 95–102, doi:10.14447/jnmes.v24i2.a06.
2173. Natarajan, P.; Jegan, A.; Mohanraj, M. Wear Behavior of Ni-TiO<sub>2</sub>nano-Composite Coating on AISI 1022 CS by Pulse Electrodeposition. *Journal of New Materials for Electrochemical Systems* **2020**, *23*, 177–181, doi:10.14447/jnmes.v23i3.a04.
2174. Cappelli, M.; Cordella, F.; Bertoncini, F.; Raugi, M. Guided Waves as an Online Monitoring Technology for Long-Term Operation in Nuclear Power Plants: Experimental Results on a Steam Discharge Pipe. *Journal of Nuclear Engineering and Radiation Science* **2019**, *5*, doi:10.1115/1.4041193.
2175. Palomino, L.M.; El-Genk, M.S.; Schriener, T.M. Postoperation Dose Rate Estimates for the Very-Small, Long-Life, Modular Reactor. *Journal of Nuclear Engineering and Radiation Science* **2020**, *6*, doi:10.1115/1.4045297.
2176. Patera, J.; Jansa, J. Application of Nonlinear Elastic Wave Spectroscopy in the Field of Nuclear Energy. *Journal of Nuclear Engineering and Radiation Science* **2021**, *7*, doi:10.1115/1.4048238.
2177. Kang, M.; Seo, M.; Kim, S.-G.; Kwon, K.-J.; Jung, H. Long-Term Experiments for Demonstrating Durability of a Concrete Barrier and Gas Generation in a Low-and Intermediate-Level Waste Disposal Facility. *Journal of Nuclear Fuel Cycle and Waste Technology* **2021**, *19*, 267–270, doi:10.7733/jnfcwt.2021.19.2.267.
2178. Muth, B.; Alrawash, S.; Park, C.J.; Kim, J.S. A Study on Reusable Metal Component as Burnable Absorber through Monte Carlo Depletion Analysis. *Journal of Nuclear Fuel Cycle and Waste Technology* **2020**, *18*, 481–496, doi:10.7733/jnfcwt.2020.18.4.481.
2179. Bach, A.-C.; Martin, F.; Duhamel, C.; Perrin, S.; Jomard, F.; Crepin, J. Hydrogen Trapping by Irradiation-Induced Defects in 316 L stainless Steel: A Combined Experimental and Modeling Study. *Journal of Nuclear Materials* **2022**, *562*, doi:10.1016/j.jnucmat.2022.153603.
2180. Barcellini, C.; Harrison, R.W.; Dumbill, S.; Donnelly, S.E.; Jimenez-Melero, E. Evolution of Radiation-Induced Lattice Defects in 20/25 Nb-Stabilised Austenitic Stainless Steel during in-Situ Proton Irradiation. *Journal of Nuclear Materials* **2019**, *514*, 90–100, doi:10.1016/j.jnucmat.2018.11.019.
2181. Beck, C.L.; Riley, B.J.; Chong, S.; Karkamkar, A.; Seiner, D.R.; Clark, S.B. Molecular Iodine Interactions with Metal Substrates: Towards the Understanding of Iodine Interactions in the Environment Following a Nuclear Accident. *Journal of Nuclear Materials* **2021**, *546*, doi:10.1016/j.jnucmat.2020.152771.
2182. Echániz, T.; de Arrieta, I.G.; Gil-Muñoz, A.; Fernández-Pereda, J.; Fuente, R.; Klimenkov, M.; López, G.A. Infrared Emissivity of Reduced-Activation Eurofer 97

- for Fusion Reactor Applications. *Journal of Nuclear Materials* **2021**, *549*, doi:10.1016/j.jnucmat.2021.152907.
2183. Fujita, T.; Hirabayashi, J.; Katayama, Y.; Kano, F.; Watanabe, H. Contribution of Dislocation Loop to Radiation-Hardening of RPV Steels Studied by STEM/EDS with Surveillance Test Pieces. *Journal of Nuclear Materials* **2022**, *572*, doi:10.1016/j.jnucmat.2022.154055.
2184. Fukuyama, H.; Higashi, H.; Yamano, H. Normal Spectral Emissivity, Specific Heat Capacity, and Thermal Conductivity of Type 316 Austenitic Stainless Steel Containing up to 10 Mass% B4C in a Liquid State. *Journal of Nuclear Materials* **2022**, *568*, doi:10.1016/j.jnucmat.2022.153865.
2185. Gaganidze, E.; Chauhan, A.; Schneider, H.-C.; Terentyev, D.; Borghmans, G.; Aktaa, J. Fracture-Mechanical Properties of Neutron Irradiated ITER Specification Tungsten. *Journal of Nuclear Materials* **2021**, *547*, doi:10.1016/j.jnucmat.2020.152761.
2186. Hure, J.; Parrot, A.; Meunier, S. Numerical Prediction of the Effect of Irradiation on the Charpy Upper Shelf Energy of Reactor Pressure Vessel Steels. *Journal of Nuclear Materials* **2022**, *570*, doi:10.1016/j.jnucmat.2022.153956.
2187. Imran, M.; Wu, D.; Sattar, H.; Amir, M.; He, Z.-L.; Hai, R.; Gupta, P.D.; Remnev, G.; Ding, H. Characterization of Multilayer Coatings of Aluminium, Tungsten and Molybdenum on Steel Substrate Using Laser-Induced Breakdown Spectroscopy. *Journal of Nuclear Materials* **2021**, *544*, doi:10.1016/j.jnucmat.2020.152661.
2188. Karpov, S.A.; Tolstolutsкая, G.D.; Kalchenko, A.S. Effect of Noble-Gas Bubbles on Deuterium Trapping Behavior in Argon Pre-Implanted Stainless Steel. *Journal of Nuclear Materials* **2022**, *566*, doi:10.1016/j.jnucmat.2022.153661.
2189. Li, F.; Wei, Y.; Luo, F.; Zhang, W.; Zhou, X.; Chen, Y.; Chen, C.; Guo, L.; Xin, J.; Mo, S. Behaviors of Bubble-Loop Complexes in He-Irradiated CLAM Steels at Elevated Temperatures. *Journal of Nuclear Materials* **2020**, *529*, doi:10.1016/j.jnucmat.2019.151954.
2190. Liu, X.; He, L.; Yan, H.; Bachhav, M.; Stubbins, J.F. A Transmission Electron Microscopy Study of EBR-II Neutron-Irradiated Austenitic Stainless Steel 304 and Nickel-Base Alloy X-750. *Journal of Nuclear Materials* **2020**, *528*, doi:10.1016/j.jnucmat.2019.151851.
2191. Niu, W.; Li, Z.; Ernst, F.; Lillard, R.S. The Passivity of Low-Temperature Carburized Austenitic Stainless Steel AISI-316L in a Simulated Boiling-Water-Reactor Environment. *Journal of Nuclear Materials* **2020**, *537*, doi:10.1016/j.jnucmat.2020.152197.
2192. Parida, S.K.; Nagaraj, S.; Venkatesh, M.; Sudha, R.; Sekhar, K.R.; Ramaseshan, R.; Ganesan, R. Studies on Chemical Compatibility of Steels with Liquid Lithium. *Journal of Nuclear Materials* **2019**, *526*, doi:10.1016/j.jnucmat.2019.151761.
2193. Park, J.; Kim, J.S.; Lee, D.Y.; Lee, S.H. Real-Time Monitoring of Stress Corrosion Cracking in 304 L Stainless Steel Pipe Using Acoustic Emission. *Journal of Nuclear Materials* **2022**, *571*, doi:10.1016/j.jnucmat.2022.154009.
2194. Pereira, V.S.M.; Schut, H.; Sietsma, J. A Study of the Microstructural Stability and

- Defect Evolution in an ODS Eurofer Steel by Means of Electron Microscopy and Positron Annihilation Spectroscopy. *Journal of Nuclear Materials* **2020**, *540*, doi:10.1016/j.jnucmat.2020.152398.
2195. Rao, C.J.; Venkatesh, P.; Ningshen, S. Corrosion Assessment of 9Cr-1Mo Steel in Molten LiCl-KCl Eutectic Salt by Electrochemical Methods. *Journal of Nuclear Materials* **2019**, *514*, 114–122, doi:10.1016/j.jnucmat.2018.11.014.
2196. Sadeghilaridjani, M.; Ayyagari, A.; Muskeri, S.; Hasannaeimi, V.; Salloom, R.; Chen, W.-Y.; Mukherjee, S. Ion Irradiation Response and Mechanical Behavior of Reduced Activity High Entropy Alloy. *Journal of Nuclear Materials* **2020**, *529*, doi:10.1016/j.jnucmat.2019.151955.
2197. Shi, J.; Liu, X.; Peng, L.; Huang, J.; Sun, H.; Li, J. Atomic-Scale Mechanisms of He/V Ratio Effect on Helium Bubble Hardening in Iron for Neutron Irradiated F/M Steels. *Journal of Nuclear Materials* **2020**, *542*, doi:10.1016/j.jnucmat.2020.152495.
2198. Takamizawa, H.; Hata, K.; Nishiyama, Y.; Toyama, T.; Nagai, Y. The Role of Silicon on Solute Clustering and Embrittlement in Highly Neutron-Irradiated Pressurized Water Reactor Surveillance Test Specimens. *Journal of Nuclear Materials* **2021**, *556*, doi:10.1016/j.jnucmat.2021.153203.
2199. Vande Pitte, J.; Uytendhouwen, I.; Gusarov, A.; Del Serra, D.; Dyck, S.V.; Detavernier, C.; Lauwaert, J. Irradiation Temperature Monitoring with SiC for RPV Steel at Low Fluence. *Journal of Nuclear Materials* **2021**, *556*, doi:10.1016/j.jnucmat.2021.153192.
2200. Williams, A.N.; Cao, G.; Shaltry, M.R. Voltammetry Measurements in Lithium Chloride-Lithium Oxide (LiCl–Li<sub>2</sub>O) Salt: An Evaluation of Working Electrode Materials. *Journal of Nuclear Materials* **2021**, *546*, doi:10.1016/j.jnucmat.2020.152760.
2201. Chang, N.; Eun, H.; Kim, S.; Seo, B.; Kim, Y. Decontamination of Corrosion Oxides in the Heat Transport System of a Pressurized Heavy Water Reactor Using Chelate-Free Inorganic Acid. *Journal of Nuclear Science and Technology* **2022**, *59*, 306–317, doi:10.1080/00223131.2021.1964404.
2202. Ishikawa, D.; Hasegawa, S. Hollow Cathode Atomic Source Applicable to Gas, Liquid Residue, and Solid Sample Phases. *Journal of Nuclear Science and Technology* **2019**, *56*, 809–813, doi:10.1080/00223131.2018.1532848.
2203. Kelvin, M.; Verpaele, S.; Leybourne, M.; Layton-Matthews, D.; Vermeir, P. Comparison of Quantitative Mineralogy and Sequential Leaching for Characterization of Ni in Workplace Dust Collected at a Stainless Steel Operation. *Journal of Occupational and Environmental Hygiene* **2021**, *18*, 555–569, doi:10.1080/15459624.2021.1985726.
2204. Su, W.; Chen, Y.; Bezerra, M.; Wang, J. Respiratory Deposition of Ultrafine Welding Fume Particles. *Journal of Occupational and Environmental Hygiene* **2019**, *16*, 694–706, doi:10.1080/15459624.2019.1652306.
2205. Badulin, S.I.; Vershinin, V.V.; Levchenko, D.G.; Ivonin, D.V.; Zatsepin, A.G.; Ostrovskii, A.G.; Lobkovsky, L.I. A Project of Concrete Stabilized Spar Buoy as a Coastal Environmental Observation and Maritime Safety Platform. *Journal of*



- Ocean Engineering and Marine Energy* **2021**, *7*, 115–127, doi:10.1007/s40722-021-00190-2.
2206. Tian, J.; Chen, Z.; Jing, J.; Feng, C.; Sun, M.; Li, W. Photoelectrochemical Cathodic Protection of Cu<sub>2</sub>O/TiO<sub>2</sub> p-n Heterojunction under Visible Light. *Journal of Oceanology and Limnology* **2020**, *38*, 1517–1531, doi:10.1007/s00343-020-9327-y.
2207. Gharbi, K.; Chouicha, S.; Kelland, M.A. Field Test Investigation of the Performance of Corrosion Inhibitors: A Case Study. *Journal of Petroleum Exploration and Production Technology* **2021**, *11*, 3879–3888, doi:10.1007/s13202-021-01287-y.
2208. Stoica, D.B.; Eparu, C.N.; Neacsu, A.; Prundurel, A.P.; Simescu, B.N. Investigation of the Gas Losses in Transmission Networks. *Journal of Petroleum Exploration and Production Technology* **2022**, *12*, 1665–1676, doi:10.1007/s13202-021-01426-5.
2209. Ahmed, A.; Elkatatny, S.; Onaizi, S. Incorporating Steel-Industry Waste in Water Based Drilling Fluids for Hydrogen Sulfide Scavenging. *Journal of Petroleum Science and Engineering* **2022**, *216*, doi:10.1016/j.petrol.2022.110818.
2210. Chauhan, D.S.; Quraishi, M.A.; Sorour, A.A.; Verma, C. A Review on Corrosion Inhibitors for High-Pressure Supercritical CO<sub>2</sub> Environment: Challenges and Opportunities. *Journal of Petroleum Science and Engineering* **2022**, *215*, doi:10.1016/j.petrol.2022.110695.
2211. Elgaddafi, R.; Ahmed, R.; Shah, S. Corrosion of Carbon Steel in CO<sub>2</sub> Saturated Brine at Elevated Temperatures. *Journal of Petroleum Science and Engineering* **2021**, *196*, doi:10.1016/j.petrol.2020.107638.
2212. Lv, X.; Wang, H.; Liu, Y.; Chen, S.; Lan, W.; Sun, B. A Novel Method of Output Metering with Dynamometer Card for SRPS under Fault Conditions. *Journal of Petroleum Science and Engineering* **2020**, *192*, doi:10.1016/j.petrol.2020.107098.
2213. Mackey, J.; Gardiner, J.; Kutchko, B.; Brandi, M.; Fazio, J.; Hakala, J.A. Characterizing Mineralization on Low Carbon Steel Exposed to Aerated and Degassed Synthetic Hydraulic Fracture Fluids. *Journal of Petroleum Science and Engineering* **2021**, *202*, doi:10.1016/j.petrol.2021.108514.
2214. Mpelwa, M.; Tang, S.; Jin, L.; Hu, R.; Wang, C.; Hu, Y. The Study on the Properties of the Newly Extended Gemini Surfactants and Their Application Potentials in the Petroleum Industry. *Journal of Petroleum Science and Engineering* **2020**, *186*, doi:10.1016/j.petrol.2019.106799.
2215. Sliem, M.H.; Fayyad, E.M.; Abdullah, A.M.; Younan, N.A.; Al-Qahtani, N.; Nabhan, F.F.; Ramesh, A.; Laycock, N.; Ryan, M.P.; Maqbool, M.; et al. Monitoring of under Deposit Corrosion for the Oil and Gas Industry: A Review. *Journal of Petroleum Science and Engineering* **2021**, *204*, doi:10.1016/j.petrol.2021.108752.
2216. Wongpanya, P.; Saramas, Y.; Chumkratoke, C.; Wannakomol, A. Erosion–Corrosion Behaviors of 1045 and J55 Steels in Crude Oil. *Journal of Petroleum Science and Engineering* **2020**, *189*, doi:10.1016/j.petrol.2020.106965.
2217. Zhang, K.; Bokka, H.K.; Lau, H.C. Decarbonizing the Energy and Industry Sectors in Thailand by Carbon Capture and Storage. *Journal of Petroleum Science and Engineering* **2022**, *209*, doi:10.1016/j.petrol.2021.109979.

2218. Maslyk, M.; Bach, S.; Li, W.; Shylin, S.I.; Panthöfer, M.; Barton, B.; Ksenofontov, V.; Xu, K.; Meermann, B.; Kolb, U.; et al. Understanding the Stability and Recrystallization Behavior of Amorphous Zinc Phosphate. *Journal of Physical Chemistry C* **2021**, *125*, 2636–2647, doi:10.1021/acs.jpcc.0c09044.
2219. Nalam, P.C.; Pham, A.; Castillo, R.V.; Espinosa-Marzal, R.M. Adsorption Behavior and Nanotribology of Amine-Based Friction Modifiers on Steel Surfaces. *Journal of Physical Chemistry C* **2019**, *123*, 13672–13680, doi:10.1021/acs.jpcc.9b02097.
2220. Ranjith, K.P.; Hasan, M.A.; Dey, A.; Basu, B. Development of ZrB<sub>2</sub>-Based Single Layer Absorber Coating and Molten Salt Corrosion of Bulk ZrB<sub>2</sub>-SiC Ceramic for Concentrated Solar Power Application. *Journal of Physical Chemistry C* **2021**, doi:10.1021/acs.jpcc.1c01984.
2221. Tamilarasan, S.; Basha, S.J.S.; Sundararaj, S.B.; Amir, H.; Chinnusamy, V.; Thangavelu, S. Revealing the Role of Brønsted Basicity by the Electrocatalytic Reaction via Li Insertion in the MgFe<sub>2</sub>O<sub>4</sub> Lattice. *Journal of Physical Chemistry C* **2022**, *126*, 11915–11926, doi:10.1021/acs.jpcc.2c03819.
2222. Kim, C.; Chen, L.; Wang, H.; Castaneda, H. Global and Local Parameters for Characterizing and Modeling External Corrosion in Underground Coated Steel Pipelines: A Review of Critical Factors. *Journal of Pipeline Science and Engineering* **2021**, *1*, 17–35, doi:10.1016/j.jpse.2021.01.010.
2223. Kuang, W.Y. Numerical Study of Strain-Based Monitoring Parameter on Steel Strip Reinforced Thermoplastic Pipe (SSRTP) under Internal Pressure. *Journal of Pipeline Science and Engineering* **2021**, *1*, 233–240, doi:10.1016/j.jpse.2021.05.004.
2224. Liang, H.; Schaller, R.F.; Asselin, E. Three Phase Corrosion of Pipeline Steel: Size Effects of Deposited Solids under Water Droplets and an Oil Diffusion Barrier. *Journal of Pipeline Science and Engineering* **2021**, *1*, 137–147, doi:10.1016/j.jpse.2021.01.006.
2225. Tan, M.Y.; Varela, F.B.; Huo, Y. Field and Laboratory Assessment of Electrochemical Probes for Visualizing Localized Corrosion under Buried Pipeline Conditions. *Journal of Pipeline Science and Engineering* **2021**, *1*, 88–99, doi:10.1016/j.jpse.2021.01.004.
2226. Yang, Y.; Zhang, H.; Wu, K.; Chen, P.; Sui, Y.; Yang, D.; Liu, X. Strain Capacity Analysis of the Mismatched Welding Joint with Misalignments of D 1,422 Mm X80 Steel Pipelines: An Experimental and Numerical Investigation. *Journal of Pipeline Science and Engineering* **2021**, *1*, 212–224, doi:10.1016/j.jpse.2021.05.002.
2227. Estrada-Flores, J.D.; García-López, M.C.; Elizondo-Martínez, P.; Pérez-Rodríguez, N.A.; De la Rosa, J.R.; Sánchez-Anguiano, M.G. Alternative Reuse of Oligomers Derived from Poly(Ethylene Terephthalate) Waste Deposited onto Microspheres and Determination of Adsorbent Properties Toward Toxic Metals. *Journal of Polymers and the Environment* **2020**, *28*, 1654–1663, doi:10.1007/s10924-020-01715-w.
2228. Li, B.; Li, H.; Chen, K.; Liang, C.; Luo, Y.; Xiao, W.; Liu, X.; Liao, X. Stainless Steel Screen Modified with a Self-Healing Hydrogel for Efficient Gravity-Driven Oil–Water Separation. *Journal of Polymers and the Environment* **2022**, *30*, 2165–2175,

- doi:10.1007/s10924-021-02348-3.
2229. Leng, Y.; Ming, P.; Yang, D.; Zhang, C. Stainless Steel Bipolar Plates for Proton Exchange Membrane Fuel Cells: Materials, Flow Channel Design and Forming Processes. *Journal of Power Sources* **2020**, *451*, doi:10.1016/j.jpowsour.2020.227783.
2230. Li, P.; Luo, S.-H.; Wang, Y.; Yan, S.; Teng, F.; Feng, J.; Wang, Q.; Zhang, Y.; Mu, W.; Zhai, X.; et al. Cleaner and Effective Recovery of Metals and Synthetic Lithium-Ion Batteries from Extracted Vanadium Residue through Selective Leaching. *Journal of Power Sources* **2021**, *482*, doi:10.1016/j.jpowsour.2020.228970.
2231. Miao, Z.; Meng, X.; Liu, L. Analyzing and Optimizing the Power Generation Performance of Thermoelectric Generators Based on an Industrial Environment. *Journal of Power Sources* **2022**, *541*, doi:10.1016/j.jpowsour.2022.231699.
2232. Sabato, A.G.; Rost, A.; Schilm, J.; Kusnezoff, M.; Salvo, M.; Chrysanthou, A.; Smeacetto, F. Effect of Electric Load and Dual Atmosphere on the Properties of an Alkali Containing Diopside-Based Glass Sealant for Solid Oxide Cells. *Journal of Power Sources* **2019**, *415*, 15–24, doi:10.1016/j.jpowsour.2019.01.051.
2233. Zhang, Q.; Tong, Z.; Tong, S. Effect of Cathode Recirculation on High Potential Limitation and Self-Humidification of Hydrogen Fuel Cell System. *Journal of Power Sources* **2020**, *468*, doi:10.1016/j.jpowsour.2020.228388.
2234. Zhang, R.; Lan, S.; Xu, Z.; Qiu, D.; Peng, L. Investigation and Optimization of the Ultra-Thin Metallic Bipolar Plate Multi-Stage Forming for Proton Exchange Membrane Fuel Cell. *Journal of Power Sources* **2021**, *484*, doi:10.1016/j.jpowsour.2020.229298.
2235. Tian, Y.-F.; Cai, Z.; Sun, M.-B.; Feng, R.; Xing, H.; Yan, B.; Wan, M.-G.; Sun, Y.-C.; Wang, H.-B.; Zhu, J.-J. Ignition Characteristics of Scramjet Combustor with Laser Ablation and Laser-Induced Breakdown. *Journal of Propulsion and Power* **2022**, *38*, 799–808, doi:10.2514/1.B38660.
2236. Billon, S.; Sardini, P.; Leblond, S.; Fichet, P. From Bq Cm<sup>-3</sup> to Bq Cm<sup>-2</sup> (and Conversely)—Part 2: Useful Dataset to Apply the Conversion to Decommissioning Operations. *Journal of Radioanalytical and Nuclear Chemistry* **2019**, *320*, 699–709, doi:10.1007/s10967-019-06540-7.
2237. Chen, Q.; Wang, H.; Hu, E.; Lei, Z.; Liu, W.; Jiang, X.; Hou, W.; Wang, Q. Efficient Adsorption of Uranium (VI) from Aqueous Solution by a Novel Modified Steel Slag Adsorbent. *Journal of Radioanalytical and Nuclear Chemistry* **2020**, *323*, 73–81, doi:10.1007/s10967-019-06848-4.
2238. El-Sersy, A.R.; Hassan, M.A.; Mostafa, K.; Abdelsalam, A.; Osman, W. Prototype Mn-Solution Bath for Low Activity Primary Standard Neutron Dosimetry. *Journal of Radioanalytical and Nuclear Chemistry* **2020**, *326*, 1039–1046, doi:10.1007/s10967-020-07405-0.
2239. Hamilton, D.E.; Gonzalez, M.; Simpson, M.F. Application of Zero Resistance Ammeter to Real Time Measurement of Redox Control in Molten Chloride Salts. *Journal of Radioanalytical and Nuclear Chemistry* **2022**, doi:10.1007/s10967-022-08509-5.

2240. Justino, A.R.; Canha, N.; Gamelas, C.; Coutinho, J.T.; Kertesz, Z.; Almeida, S.M. Contribution of Micro-PIXE to the Characterization of Settled Dust Events in an Urban Area Affected by Industrial Activities. *Journal of Radioanalytical and Nuclear Chemistry* **2019**, *322*, 1953–1964, doi:10.1007/s10967-019-06860-8.
2241. Lapka, J.L.; Haas, D.A.; Lowrey, J.D. Radiokrypton and Radioxenon Diffusion in Silicate and Sodium Chloride Media. *Journal of Radioanalytical and Nuclear Chemistry* **2022**, doi:10.1007/s10967-022-08533-5.
2242. Ramakrishna Reddy, S.; Pandey, N.K.; Mondal, S.; Sivaraman, N. Catalytic Reduction of U(VI) with Hydrazine Using Pt/SiO<sub>2</sub> Catalyst in Nitric Acid Medium—Kinetics and Equilibrium. *Journal of Radioanalytical and Nuclear Chemistry* **2020**, *325*, 425–434, doi:10.1007/s10967-020-07265-8.
2243. Taylor, N.R.; Alnajjar, N.; Jarrell, J.; Kandlakunta, P.; Simpson, M.; Blue, T.E.; Cao, L.R. Isotopic Concentration of Uranium from Alpha Spectrum of Electrodeposited Source on 4H-SiC Detector at 500 °C. *Journal of Radioanalytical and Nuclear Chemistry* **2019**, *320*, 441–449, doi:10.1007/s10967-019-06492-y.
2244. Singh, K.; Arora, G.; Singh, P.; Gupta, A. IoT-Based Collection Vendor Machine (CVM) for E-Waste Management. *Journal of Reliable Intelligent Environments* **2021**, *7*, 35–47, doi:10.1007/s40860-020-00124-z.
2245. Ali, E.H.; Naser, J.A.; Ahmed, Z.W.; Himdan, T.A. Corrosion Protection of 5083 Aa in Saline Water by Polyacrylonitrile Nanofibers. *Journal of Renewable Materials* **2021**, *9*, 1927–1939, doi:10.32604/jrm.2021.015624.
2246. Chen, X.; Kong, X.; Fu, Y.; Sun, W.; Guan, R. Experimental and Theoretical Study on the Flexural Behavior of Recycled Concrete Beams Reinforced with Gfrp Bars. *Journal of Renewable Materials* **2021**, *9*, 1169–1188, doi:10.32604/jrm.2021.014809.
2247. Feng, X.; Zhang, Y.; Lu, X.; Xu, Y.; Zhang, L.; Zhu, C.; Wu, T.; Yang, Y.; Zhao, X. Corrosion Performance of Stainless Steel Reinforcement in the Concrete Prepared with Seawater and Coral Waste and Its Ecological Effects. *Journal of Renewable Materials* **2020**, *8*, 513–534, doi:10.32604/jrm.2020.09549.
2248. Khan, S.U.; Ahmed, A.; Ali, S.; Ayub, A.; Shuja, A.; Shahid, M.A. Use of Scrapped Rubber Tires for Sustainable Construction of Manhole Covers. *Journal of Renewable Materials* **2021**, *9*, 1013–1029, doi:10.32604/jrm.2021.014344.
2249. Müller, K.; Sonderegger, W.; Kläusler, O.; Klippel, M.; Escamilla, E.Z. Mechanical Characterisation of Densified Hardwood with Regard to Structural Applications. *Journal of Renewable Materials* **2020**, *8*, 1091–1109, doi:10.32604/jrm.2020.09483.
2250. Garcia-Blas, N.; Jimenez-Relinque, E.; Nevshupa, R.; Castellote, M. Electrokinetic Approach to Assess the Behaviour of a Contaminated Marine Sediment. *Journal of Soils and Sediments* **2020**, *20*, 2673–2684, doi:10.1007/s11368-020-02615-1.
2251. Lenoir, T.; Duc, M.; Lassabatere, L.; Bellagh, K. Identification of the Artifact Contribution to Two Urban Technosols by Coupling a Sorting Test, Chemical Analyses, and a Least Absolute Residual Procedure. *Journal of Soils and Sediments* **2019**, *19*, 683–701, doi:10.1007/s11368-018-2074-4.
2252. Gao, Z.; Sridhar, S.; Spiller, D.E.; Taylor, P.R. REVIEW OF IMPURITY REMOVAL

- METHODS IN STEEL SCRAP RECYCLING. *Journal of Solid Waste Technology and Management* **2021**, *47*, 732–745, doi:10.5276/JSWTM/2021.732.
2253. Lien, A.G.; Lolli, N. Costs and Procurement for Cross-Laminated Timber in Mid-Rise Buildings. *Journal of Sustainable Architecture and Civil Engineering* **2019**, *25*, 43–52, doi:10.5755/j01.sace.25.2.22099.
2254. Ali, B.; Kurda, R.; Ahmed, H.; Alyousef, R. Effect of Recycled Tyre Steel Fiber on Flexural Toughness, Residual Strength, and Chloride Permeability of High-Performance Concrete (HPC). *Journal of Sustainable Cement-Based Materials* **2022**, doi:10.1080/21650373.2021.2025165.
2255. Assaad, J.J.; Matar, P.; Gergess, A. Effect of Quality of Recycled Aggregates on Bond Strength between Concrete and Embedded Steel Reinforcement. *Journal of Sustainable Cement-Based Materials* **2020**, *9*, 94–111, doi:10.1080/21650373.2019.1692315.
2256. Balaguera, C.A.C.; Botero, M.A.G. Multiphase Phosphate Cements from Steel Slags. *Journal of Sustainable Cement-Based Materials* **2022**, *11*, 21–40, doi:10.1080/21650373.2020.1863275.
2257. Gaurav, G.; Singh, B. Analytical Investigation in Bond of Deformed Steel Bars in Recycled Aggregate Concrete. *Journal of Sustainable Cement-Based Materials* **2020**, *9*, 191–217, doi:10.1080/21650373.2019.1709997.
2258. Kachouh, N.; El-Hassan, H.; El-Maaddawy, T. Influence of Steel Fibers on the Flexural Performance of Concrete Incorporating Recycled Concrete Aggregates and Dune Sand. *Journal of Sustainable Cement-Based Materials* **2021**, *10*, 165–192, doi:10.1080/21650373.2020.1809546.
2259. Raad, D.; Assaad, J.J. Structural Properties of Fiber-Reinforced Concrete Containing Thermosetting Polymer Plastic Wastes. *Journal of Sustainable Cement-Based Materials* **2022**, *11*, 196–211, doi:10.1080/21650373.2021.1899998.
2260. Zhao, K.; Zhang, P.; Guo, W.; Tian, Y.; Xue, S.; Bao, J.; Wang, W. Steel Reinforcement Corrosion in Strain Hardening Cementitious Composites (SHCC): The Role of Multiple Microcracks and Surface Impregnation. *Journal of Sustainable Cement-Based Materials* **2021**, doi:10.1080/21650373.2021.2003907.
2261. Al Nahdi, W.A.; Hassan Ali, M.I. Electricity and Water Cogeneration Utilizing Aluminium Furnaces Waste Heat Integrating Thermal Storage Organic Rankine Cycle. *Journal of Sustainable Development of Energy, Water and Environment Systems* **2021**, *9*, doi:10.13044/j.sdewes.d8.0381.
2262. Bezsonov, O.; Ilyunin, O.; Kaldybaeva, B.; Selyakov, O.; Perevertaylenko, O.; Khusanov, A.; Rudenko, O.; Udovenko, S.; Shamraev, A.; Zorenko, V. Resource and Energy Saving Neural Network-Based Control Approach for Continuous Carbon Steel Pickling Process. *Journal of Sustainable Development of Energy, Water and Environment Systems* **2019**, *7*, 275–292, doi:10.13044/j.sdewes.d6.0249.
2263. Pérez, S.L.; López, S.H.; Astigarraga, E.U.; Arce, I.H.; Botas, M.G.A.; Iñarga, J.I.; Txapartegi, P.F.A.; Bou-Ali, M.M.; Iriondo, I.U. Design of a Radiant Heat Capturing Device for Steel Mills. *Journal of Sustainable Development of Energy, Water*

- and Environment Systems* **2021**, *9*, doi:10.13044/j.sdewes.d8.0365.
2264. Trovão, R.S.; Dimas Camillo, L.; da Silva, G.A.; Kulay, L. Verifying the Environmental and Energy Feasibility of Potential Improvement Actions in the Steel Production Chain in Brazil. *Journal of Sustainable Development of Energy, Water and Environment Systems* **2022**, *10*, doi:10.13044/j.sdewes.d9.0390.
2265. Abdelrahim, A.; Nguyen, H.; Omran, M.; Kinnunen, P.; Iljana, M.; Illikainen, M.; Fabritius, T. Development of Cold-Bonded Briquettes Using By-Product-Based Ettringite Binder from Ladle Slag. *Journal of Sustainable Metallurgy* **2022**, *8*, 468–487, doi:10.1007/s40831-022-00511-1.
2266. Alex, T.C.; Mucsi, G.; Venugopalan, T.; Kumar, S. BOF Steel Slag: Critical Assessment and Integrated Approach for Utilization. *Journal of Sustainable Metallurgy* **2021**, *7*, 1407–1424, doi:10.1007/s40831-021-00435-2.
2267. Binnemans, K.; Jones, P.T.; Manjón Fernández, Á.; Masaguer Torres, V. Hydrometallurgical Processes for the Recovery of Metals from Steel Industry By-Products: A Critical Review. *Journal of Sustainable Metallurgy* **2020**, *6*, 505–540, doi:10.1007/s40831-020-00306-2.
2268. Chen, Z.; Zheng, R.; Ju, D.; Mao, R.; Ma, H.; Peng, H.; Du, W. Carbothermic Kinetics and Reaction Mechanism of Carbon-Containing Pellets: A Combined Treatment of Chromium-Containing Sludge and Zinc-Bearing Dust. *Journal of Sustainable Metallurgy* **2022**, *8*, 1001–1013, doi:10.1007/s40831-022-00549-1.
2269. Compañero, R.J.; Feldmann, A.; Tilliander, A. Circular Steel: How Information and Actor Incentives Impact the Recyclability of Scrap. *Journal of Sustainable Metallurgy* **2021**, *7*, 1654–1670, doi:10.1007/s40831-021-00436-1.
2270. Das, S.; Biswas, A.; Ghoroi, C.; Konar, B.; Paliwal, M. Oxidation of Ferrochrome Slag Using CO<sub>2</sub>: A Possible O<sub>2</sub> Carrier in CLC Process. *Journal of Sustainable Metallurgy* **2022**, *8*, 343–359, doi:10.1007/s40831-021-00491-8.
2271. De Colle, M.; Sukenaga, S.; Mibu, K.; Kato, Y.; Matsunaga, H.; Jönsson, P.G.; Karasev, A.; Shibata, H. Study of the Hydration Behavior of Synthetic Ferropicrclase with Low Iron Oxide Concentrations to Prevent Swelling in Steel Slags. *Journal of Sustainable Metallurgy* **2021**, *7*, 547–558, doi:10.1007/s40831-021-00359-x.
2272. Du, C.; Gao, X.; Kitamura, S.-Y. Measures to Decrease and Utilize Steelmaking Slag. *Journal of Sustainable Metallurgy* **2019**, *5*, 141–153, doi:10.1007/s40831-018-0202-4.
2273. Du, C.-M.; Gao, X.; Ueda, S.; Kitamura, S.-Y. Selective Leaching of P from Steelmaking Slag in Sulfuric Acid Solution. *Journal of Sustainable Metallurgy* **2019**, *5*, 594–605, doi:10.1007/s40831-019-00252-8.
2274. Eticha, Z.G.; Rojas-Hernandez, R.E.; Olu, F.E.; Yimam, A.; Hussainova, I.; Alemayehu, E. Effect of Annealing Temperature of Brownish-Red Pigment Based on Iron Oxide Extracted by Hydrothermal Route from Mill-Scale Steel Slag. *Journal of Sustainable Metallurgy* **2022**, *8*, 218–227, doi:10.1007/s40831-021-00470-z.
2275. Gao, Z.; Sridhar, S.; Spiller, D.E.; Taylor, P.R. Applying Improved Optical

- Recognition with Machine Learning on Sorting Cu Impurities in Steel Scrap. *Journal of Sustainable Metallurgy* **2020**, *6*, 785–795, doi:10.1007/s40831-020-00300-8.
2276. Geng, X.; Ru, J.-J.; Hua, Y.-X.; Zhang, W.-W. The Recovery of Lead from Spent Lead Acid Battery Paste by Electrodeposition in Deep Eutectic Solvent. *Journal of Sustainable Metallurgy* **2022**, *8*, 1257–1268, doi:10.1007/s40831-022-00563-3.
2277. Hariharan, K.; Sivaprasad, K. Sustainable Low-Cost Method for Production of High-Entropy Alloys from Alloy Scraps. *Journal of Sustainable Metallurgy* **2022**, *8*, 625–631, doi:10.1007/s40831-022-00523-x.
2278. Harvey, L.D.D. Analysis of the Theoretical and Practical Energy Requirements to Produce Iron and Steel, with Summary Equations That Can Be Applied in Developing Future Energy Scenarios. *Journal of Sustainable Metallurgy* **2020**, *6*, 307–332, doi:10.1007/s40831-020-00276-5.
2279. Holappa, L.; Kekkonen, M.; Jokilaakso, A.; Koskinen, J. A Review of Circular Economy Prospects for Stainless Steelmaking Slags. *Journal of Sustainable Metallurgy* **2021**, *7*, 806–817, doi:10.1007/s40831-021-00392-w.
2280. Hou, D.; Wang, D.; Jiang, Z.; Qu, T.; Wang, H. The Design of Slag and Electroslag Remelting Production Technology of Steel Containing Zirconium. *Journal of Sustainable Metallurgy* **2020**, *6*, 463–477, doi:10.1007/s40831-020-00287-2.
2281. Jikar, P.C.; Dhokey, N.B. Influence of Process Parameters on Countercurrent Reactor Reduction of Oxidized Mill Scale Waste and Its Co-Relationship with Mathematical Model. *Journal of Sustainable Metallurgy* **2020**, *6*, 622–630, doi:10.1007/s40831-020-00297-0.
2282. Kerry, T.; Peters, A.; Georgakopoulos, E.; Dugulan, I.; Meijer, K.; Hage, J.; Offerman, E.; Yang, Y. Zinc Vaporization and Self-Reduction Behavior of Industrial Waste Residues for Recycling to the HIsarna Furnace. *Journal of Sustainable Metallurgy* **2022**, *8*, 658–672, doi:10.1007/s40831-021-00440-5.
2283. Lindvall, M.; So, L.L.C.; Mahdi, M.; Bolen, J.; Nell, J.; Nolet, I.; Metcalfe, D.; Mostaghel, S.; Sundqvist, O. Stabilization of Stainless Steel Slag via Air Granulation. *Journal of Sustainable Metallurgy* **2019**, *5*, 157–171, doi:10.1007/s40831-019-00212-2.
2284. Logar, V.; Škrjanc, I. The Influence of Electric-Arc-Furnace Input Feeds on Its Electrical Energy Consumption. *Journal of Sustainable Metallurgy* **2021**, *7*, 1013–1026, doi:10.1007/s40831-021-00390-y.
2285. Longbottom, R.J.; Monaghan, B.J.; Pinson, D.J.; Chew, S.J. Understanding the Self-Sintering Process of BOS Filter Cake for Improving Its Recyclability. *Journal of Sustainable Metallurgy* **2019**, *5*, 429–441, doi:10.1007/s40831-019-00233-x.
2286. Ma, N.; McDowell, B.J.; Houser, J.B.; Andrade, M.W.; Heinz, D.E. Separation of Mill Scale from Flume Wastewater Using a Dynamic Separator Toward Zero Wastes in the Steel Hot-Rolling Process. *Journal of Sustainable Metallurgy* **2019**, *5*, 97–106, doi:10.1007/s40831-018-0203-3.
2287. Mahmoudi, A.; Shakibania, S.; Mokmeli, M.; Rashchi, F.; Karimi, H.Y. Selective Separation and Recovery of Tellurium from Copper Anode Slime Using Acidic

- Leaching and Precipitation with Cuprous Ion. *Journal of Sustainable Metallurgy* **2021**, *7*, 1886–1898, doi:10.1007/s40831-021-00462-z.
2288. Manabe, T.; Miyata, M.; Ohnuki, K. Introduction of Steelmaking Process with Resource Recycling. *Journal of Sustainable Metallurgy* **2019**, *5*, 319–330, doi:10.1007/s40831-019-00221-1.
2289. Mégret, A.; Vitry, V.; Delaunois, F. Study of the Processing of a Recycled WC–Co Powder: Can It Compete with Conventional WC–Co Powders? *Journal of Sustainable Metallurgy* **2021**, *7*, 448–458, doi:10.1007/s40831-021-00346-2.
2290. Mousa, E.; Lundgren, M.; Sundqvist Ökvist, L.; From, L.-E.; Robles, A.; Hällsten, S.; Sundelin, B.; Friberg, H.; El-Tawil, A. Reduced Carbon Consumption and CO<sub>2</sub> Emission at the Blast Furnace by Use of Briquettes Containing Torrefied Sawdust. *Journal of Sustainable Metallurgy* **2019**, *5*, 391–401, doi:10.1007/s40831-019-00229-7.
2291. Polat, B.T.; Öner, İ.E.; Kan, S.; Benzeşik, K.; Yücel, O. Fused Calcium Aluminate Production from Aluminum White Dross Residue. *Journal of Sustainable Metallurgy* **2022**, *8*, 851–862, doi:10.1007/s40831-022-00532-w.
2292. Raupenstrauch, H.; Doschek-Held, K.; Rieger, J.; Reiter, W. RecoDust—An Efficient Way of Processing Steel Mill Dusts. *Journal of Sustainable Metallurgy* **2019**, *5*, 310–318, doi:10.1007/s40831-019-00216-y.
2293. Rieger, J.; Schenk, J. Residual Processing in the European Steel Industry: A Technological Overview. *Journal of Sustainable Metallurgy* **2019**, *5*, 295–309, doi:10.1007/s40831-019-00220-2.
2294. Shatokha, V.; Matukhno, E.; Belokon, K.; Shmatkov, G. Potential Means to Reduce CO<sub>2</sub> Emissions of Iron and Steel Industry in Ukraine Using Best Available Technologies. *Journal of Sustainable Metallurgy* **2020**, *6*, 451–462, doi:10.1007/s40831-020-00289-0.
2295. Suer, J.; Ahrenhold, F.; Traverso, M. Carbon Footprint and Energy Transformation Analysis of Steel Produced via a Direct Reduction Plant with an Integrated Electric Melting Unit. *Journal of Sustainable Metallurgy* **2022**, doi:10.1007/s40831-022-00585-x.
2296. Tomas da Rocha, L.; Chung, B.-J.; Jung, S.-M. Formation and Reduction of NO from the Combustion of the Fuels Used in the Sintering Process of Iron Ore in the Presence of Additives. *Journal of Sustainable Metallurgy* **2021**, *7*, 377–390, doi:10.1007/s40831-021-00368-w.
2297. Varanasi, S.S.; More, V.M.R.; Rao, M.B.V.; Alli, S.R.; Tangudu, A.K.; Santanu, D. Recycling Ladle Furnace Slag as Flux in Steelmaking: A Review. *Journal of Sustainable Metallurgy* **2019**, *5*, 449–462, doi:10.1007/s40831-019-00243-9.
2298. Vishvakarma, S.; Dhawan, N. Recovery of Cobalt and Lithium Values from Discarded Li-Ion Batteries. *Journal of Sustainable Metallurgy* **2019**, *5*, 204–209, doi:10.1007/s40831-018-00208-4.
2299. Wallin, M.; Bugten, A.V.; Tranell, G.; Ekstroem, K.E. Valorization of SiMn Sludge for Production of Low-Phosphorus Ferroalloys. *Journal of Sustainable Metallurgy* **2021**, *7*, 978–984, doi:10.1007/s40831-021-00385-9.



2300. Wei, W.; Samuelsson, P.B.; Tilliander, A.; Gyllenram, R.; Jönsson, P.G. Energy Consumption and Greenhouse Gas Emissions During Ferromolybdenum Production. *Journal of Sustainable Metallurgy* **2020**, *6*, 103–112, doi:10.1007/s40831-019-00260-8.
2301. Xiong, L.; Peng, Z.; Mao, X.; Wang, J.; Rao, M.; Zhang, Y.; Li, G. Efficient Utilization of Carbon-Bearing Dusts in Composite Agglomeration Process for Iron Ore Sintering. *Journal of Sustainable Metallurgy* **2022**, *8*, 1065–1077, doi:10.1007/s40831-022-00546-4.
2302. Yu, V.F.; Bahauddin, A.; Yang, C.-L.; Wu, Y.J.; Ekawati, R. A Combined Approach for Green Supply Chain Management Performance Measurement in a Steel Manufacturing Company: An Indonesian Case. *Journal of Sustainable Metallurgy* **2022**, *8*, 1140–1153, doi:10.1007/s40831-022-00559-z.
2303. Zhang, H.; Yuan, Z.; Mei, L.; Peng, X.; Liu, K.; Zhao, H. The Behavior of CO<sub>2</sub> Supersonic Jets in the Converter Slag-Splashing Process. *Journal of Sustainable Metallurgy* **2022**, doi:10.1007/s40831-022-00607-8.
2304. Zhou, G.; Wang, Y.; Qi, T.; Zhou, Q.; Liu, G.; Peng, Z.; Li, X. Comprehensive Utilization of Al-Goethite-Containing Red Mud Treated Through Low-Temperature Sodium Salt-Assisted Roasting–Water Leaching. *Journal of Sustainable Metallurgy* **2022**, *8*, 825–836, doi:10.1007/s40831-022-00538-4.
2305. Ali, M.; Hedrick, C.; Lutfullaeva, A.; Alam, K. Performance Evaluation of Novel Wet Vibrational Precipitator. *Journal of the Air and Waste Management Association* **2019**, *69*, 743–751, doi:10.1080/10962247.2019.1576555.
2306. He, L.; Jin, H.; Wang, J.; Li, J.; Yu, Q.; Ma, W. Zero-Impact Emission Limits of Enterprise-Scale Air Pollutants—a Case Study of a Typical Petrochemical Enterprise in Shanghai Chemical Industry Park. *Journal of the Air and Waste Management Association* **2022**, *72*, 98–115, doi:10.1080/10962247.2021.2002740.
2307. Hua, J.; Cheng, C.-W.; Hwang, D.-S. Total Life Cycle Emissions of Post-Panamax Containerships Powered by Conventional Fuel or Natural Gas. *Journal of the Air and Waste Management Association* **2019**, *69*, 131–144, doi:10.1080/10962247.2018.1505675.
2308. Kim, B.; Oh, S.; Jung, J.; Lee, J.-H. Investigation of Adsorption Characteristics of Four Toxic Gases (Nitric Oxide, Nitrogen Dioxide, Sulfur Dioxide, and Hydrogen Chloride) on the Inner Surface of Nickel-Coated Manganese Steel Cylinders and Aluminum Cylinders. *Journal of the Air and Waste Management Association* **2019**, *69*, 726–733, doi:10.1080/10962247.2019.1574247.
2309. Mahato, M.K.; Singh, A.K. Evaluation of Atmospheric Dust Deposition Rates and Their Mineral Characterization in Copper and Iron Mining Areas, Singhbhum, India. *Journal of the Air and Waste Management Association* **2020**, *70*, 1378–1389, doi:10.1080/10962247.2020.1818647.
2310. Miramontes-Martínez, L.R.; Rivas-García, P.; Albalade-Ramírez, A.; Botello-Álvarez, J.E.; Escamilla-Alvarado, C.; Gomez-Gonzalez, R.; Alcalá-Rodríguez, M.M.; Valencia-Vázquez, R.; Santos-López, I.A. Anaerobic Co-Digestion of Fruit

- and Vegetable Waste: Synergy and Process Stability Analysis. *Journal of the Air and Waste Management Association* **2021**, *71*, 620–632, doi:10.1080/10962247.2021.1873206.
2311. Park, S. Assessing the Recycling Performance of Extended Producer Responsibility (EPR) Programs: A Case Study of the Steel Can Packaging Recycling System in South Korea. *Journal of the Air and Waste Management Association* **2021**, *71*, 586–596, doi:10.1080/10962247.2020.1866120.
2312. Xu, C.; Chen, P.; Chang, J.; Deng, Z.; Qing, S. Experimental Study on the Removal of PM<sub>2.5</sub> Using Modified Carbon Steel Collectors with Hydrophilic Properties in Wet ESPs. *Journal of the Air and Waste Management Association* **2021**, *71*, 1361–1374, doi:10.1080/10962247.2021.1939196.
2313. Fernández-Ivarez, M.; Velasco, F.; Bautista, A.; Gonzalez-Garcia, Y.; Galiana, B.; Fernández-Ivarez, M. Corrosion Protection in Chloride Environments of Nanosilica Containing Epoxy Powder Coatings with Defects. *Journal of the Electrochemical Society* **2020**, *167*, doi:10.1149/1945-7111/abd003.
2314. Göhl, D.; Rueß, H.; Mingers, A.M.; Mayrhofer, K.J.J.; Schneider, J.M.; Ledendecker, M. Electrochemical Passivation Properties of Valve Transition Metal Carbides. *Journal of the Electrochemical Society* **2022**, *169*, doi:10.1149/1945-7111/ac47e6.
2315. Guo, L.; Mi, N.; Mohammed-Ali, H.; Ghahari, M.; Plessis, A.D.; Cook, A.; Street, S.; Reinhard, C.; Atwood, R.C.; Rayment, T.; et al. Effect of Mixed Salts on Atmospheric Corrosion of 304 Stainless Steel. *Journal of the Electrochemical Society* **2019**, *166*, C3010–C3014, doi:10.1149/2.0021911jes.
2316. Klapper, H.S.; Zajec, B.; Heyn, A.; Legat, A. Elucidating Nucleation Stages of Transgranular Stress Corrosion Cracking in Austenitic Stainless Steel by in Situ Electrochemical and Optical Methods. *Journal of the Electrochemical Society* **2019**, *166*, C3326–C3335, doi:10.1149/2.0411911jes.
2317. Lædre, S.; Kongstein, O.E.; Oedegaard, A.; Seland, F.; Karoliussen, H. Measuring in Situ Interfacial Contact Resistance in a Proton Exchange Membrane Fuel Cell. *Journal of the Electrochemical Society* **2019**, *166*, F853–F859, doi:10.1149/2.1511912jes.
2318. Lee, C.; Said, A.O.; Stoliarov, S.I. Passive Mitigation of Thermal Runaway Propagation in Dense 18650 Lithium Ion Cell Assemblies. *Journal of the Electrochemical Society* **2020**, *167*, doi:10.1149/1945-7111/ab8978.
2319. Malki, B.; Berthomé, G.; Souier, T.; Boissy, C.; Guillotte, I.; Baroux, B. A Combined Experimental and Computational Approach to Study Crevice Corrosion of Stainless Steels. *Journal of the Electrochemical Society* **2021**, *168*, doi:10.1149/1945-7111/ac2975.
2320. Martinelli-Orlando, F.; Shi, W.; Angst, U. Corrosion Behavior of Carbon Steel in Alkaline, Deaerated Solutions: Influence of Carbonate Ions. *Journal of the Electrochemical Society* **2020**, *167*, doi:10.1149/1945-7111/ab7d44.
2321. Moon, J.T.; Schindelholz, E.J.; Melia, M.A.; Kustas, A.B.; Chidambaram, D. Corrosion of Additively Manufactured CoCrFeMnNi High Entropy Alloy in

- Molten  $\text{NaNO}_3\text{-KNO}_3$ . *Journal of the Electrochemical Society* **2020**, *167*, doi:10.1149/1945-7111/ab8ddf.
2322. Okazaki, S.; Yoshida, K.; Kodera, N.; Ujiie, S.; Nishimatsu, Y.; Tanaka, Y.; Gomei, T.; Yamada, M.; Sakuraba, S.; Masuko, T. Potentiometric Free Chlorine Detection without Using Conventional Reference Electrodes. *Journal of the Electrochemical Society* **2021**, *168*, doi:10.1149/1945-7111/ac384c.
2323. Papillon, J.; Ter-Ovanesian, B.; Ondel, O.; Adrien, J.; Maire, E. 3D Anode Microbial Fuel Cell Characterization and Monitoring Coupling X-Ray Tomography and Electrochemical Impedance Spectroscopy. *Journal of the Electrochemical Society* **2021**, *168*, doi:10.1149/1945-7111/abfcdc.
2324. Policastro, S.A.; Anderson, R.M.; Hangarter, C.M. Analysis of Galvanic Corrosion Current between an Aluminum Alloy and Stainless-Steel Exposed to an Equilibrated Droplet Electrolyte. *Journal of the Electrochemical Society* **2021**, *168*, doi:10.1149/1945-7111/abf5a7.
2325. Standish, T.E.; Braithwaite, L.J.; Shoesmith, D.W.; Noël, J.J. Influence of Area Ratio and Chloride Concentration on the Galvanic Coupling of Copper and Carbon Steel. *Journal of the Electrochemical Society* **2019**, *166*, C3448–C3455, doi:10.1149/2.0521911jes.
2326. Wint, N.; Warren, D.J.; DeVooys, A.C.A.; McMurray, H.N. The Use of Chromium and Chromium (III) Oxide PVD Coatings to Resist the Corrosion Driven Coating Delamination of Organically Coated Packaging Steel. *Journal of the Electrochemical Society* **2020**, *167*, doi:10.1149/1945-7111/abc360.
2327. Yuan, B.; Li, Z.; Tong, S.; Li, L.; Wang, C. In Situ Monitoring of Pitting Corrosion on Stainless Steel with Digital Holographic Surface Imaging. *Journal of the Electrochemical Society* **2019**, *166*, C3039–C3047, doi:10.1149/2.0061911jes.
2328. Wang, J. The Incremental Launching Construction Technology of Pontoon Pivot Conversion of Large-Span Steel Arch Bridge. *Journal of the IEST* **2020**, *63*, 46–52, doi:10.17764/1557-2196-63.1.46.
2329. Kim, J.-K.; Kee, S.-H.; Yee, J.-J.; Kim, H.K. Electrochemical Impedance Properties of Corroded Reinforcing Steel in Concrete Dominated by Diffusion of Corrosive Products. *Journal of the Korean Society for Railway* **2020**, *23*, 1206–1218, doi:10.7782/JKSR.2020.23.12.1206.
2330. Assaidi, A.; Soummane, A.; Ellouali, M.; Latrache, H.; Timinouni, M.; Zahir, H.; Mliji, E.M. Environmental Surveillance of Legionella Pneumophila in Hot Water Systems of Hotels in Morocco. *Journal of Water and Health* **2021**, *19*, 855–863, doi:10.2166/wh.2021.175.
2331. Echavez, F.L.C.; Leal, J.C.M. Ecotoxicological Effect of Heavy Metals in Free-Living Ciliate Protozoa of Lake Maracaibo, Venezuela. *Journal of Water and Land Development* **2021**, *51*, 102–116, doi:10.24425/jwld.2021.139020.
2332. Akarsu, C.; Isik, Z.; M'barek, I.; Bouchareb, R.; Dizge, N. Treatment of Personal Care Product Wastewater for Reuse by Integrated Electrocoagulation and Membrane Filtration Processes. *Journal of Water Process Engineering* **2022**, *48*,

- doi:10.1016/j.jwpe.2022.102879.
2333. Costa, J.M.; Costa, J.G.D.R.D.; Almeida Neto, A.F.D. Techniques of Nickel(II) Removal from Electroplating Industry Wastewater: Overview and Trends. *Journal of Water Process Engineering* **2022**, *46*, doi:10.1016/j.jwpe.2022.102593.
  2334. Deepti; Sinha, A.; Biswas, P.; Sarkar, S.; Bora, U.; Purkait, M.K. Separation of Chloride and Sulphate Ions from Nanofiltration Rejected Wastewater of Steel Industry. *Journal of Water Process Engineering* **2020**, *33*, doi:10.1016/j.jwpe.2019.101108.
  2335. Hong, Z.; Yu, C.; Dongxu, L.; Suiyi, Z.; Yidi, G.; Yuxin, Z.; Yang, H. Recovery of Fe from Steel Pickling Wastewater as Polymeric Fe/S Rods for Effective Adsorption of Phosphate from Electrophoresis Effluent. *Journal of Water Process Engineering* **2022**, *49*, doi:10.1016/j.jwpe.2022.103066.
  2336. Huy, D.H.; Seelen, E.; Liem-Nguyen, V. Removal Mechanisms of Cadmium and Lead Ions in Contaminated Water by Stainless Steel Slag Obtained from Scrap Metal Recycling. *Journal of Water Process Engineering* **2020**, *36*, doi:10.1016/j.jwpe.2020.101369.
  2337. Kennedy, A.M.; Arias-Paić, M. Application of Powdered Steel Slag for More Sustainable Removal of Metals from Impaired Waters. *Journal of Water Process Engineering* **2020**, *38*, doi:10.1016/j.jwpe.2020.101599.
  2338. Petrescu, L.; Burca, S.; Fermeglia, M.; Mio, A.; Cormos, C.-C. Process Simulation Coupled with LCA for the Evaluation of Liquid - Liquid Extraction Processes of Phenol from Aqueous Streams. *Journal of Water Process Engineering* **2021**, *41*, doi:10.1016/j.jwpe.2021.102077.
  2339. Zubair, M.; Manzar, M.S.; Suleiman, M.A.; Fernandes, D.P.; Meili, L.; Essa, W.A.B.; Al-Adam, H.; AlGhamdi, J.M.; Mu'azu, N.D.; Haladu, S.A.; et al. Production of Magnetic Biochar-Steel Dust Composites for Enhanced Phosphate Adsorption. *Journal of Water Process Engineering* **2022**, *47*, doi:10.1016/j.jwpe.2022.102793.
  2340. Assaidi, A.; Ellouali, M.; Latrache, H.; Zahir, H.; Karoumi, A.; Mliji, E.M. Chlorine Disinfection against Legionella Pneumophila Biofilms. *Journal of Water Sanitation and Hygiene for Development* **2020**, *10*, 885–893, doi:10.2166/washdev.2020.151.
  2341. Díaz-Piloneta, M.; Ortega-Fernández, F.; Terrados-Cristos, M.; Álvarez-Cabal, J.V. Application of Steel Slag for Degraded Land Remediation. *Land* **2022**, *11*, doi:10.3390/land11020224.
  2342. Tian, J.; Li, H.; Li, Y.; Liao, C.; Ma, W.; Xu, Y. Feasibility of Terrestrial Laser Scanning for Quantification of Vegetation Structure Parameters of Restored Sandy Land in the Southern Qinghai–Tibetan Plateau. *Land Degradation and Development* **2021**, *32*, 1667–1679, doi:10.1002/ldr.3784.
  2343. Adeleke, A.I.; Fakinle, B.S.; Odunlami, O.A.; Sonibare, J.A. Spatial Biomonitoring of Airborne Heavy Metals Emitted from a Steel Recycling Plant. *Management of Environmental Quality: An International Journal* **2020**, *31*, 548–563, doi:10.1108/MEQ-07-2019-0164.
  2344. Margiotta, F.; Balestra, C.; Buondonno, A.; Casotti, R.; D'Ambra, I.; Di Capua, I.;

- Gallia, R.; Mazzocchi, M.G.; Merquiol, L.; Pepi, M.; et al. Do Plankton Reflect the Environmental Quality Status? The Case of a Post-Industrial Mediterranean Bay. *Marine Environmental Research* **2020**, *160*, doi:10.1016/j.marenvres.2020.104980.
2345. Hsuan, J.; Parisi, C. Mapping the Supply Chain of Ship Recycling. *Marine Policy* **2020**, *118*, doi:10.1016/j.marpol.2020.103979.
2346. Razak, T.B.; Boström-Einarsson, L.; Alisa, C.A.G.; Vida, R.T.; Lamont, T.A.C. Coral Reef Restoration in Indonesia: A Review of Policies and Projects. *Marine Policy* **2022**, *137*, doi:10.1016/j.marpol.2021.104940.
2347. Andrikopoulos, A.; Merika, A.; Merikas, A.; Tsionas, M. The Dynamics of Fleet Size and Shipping Profitability: The Role of Steel-Scrap Prices. *Maritime Policy and Management* **2020**, *47*, 985–1009, doi:10.1080/03088839.2020.1735007.
2348. Al-Fakih, A.M.; Abdallah, H.H.; Aziz, M. Experimental and Theoretical Studies of the Inhibition Performance of Two Furan Derivatives on Mild Steel Corrosion in Acidic Medium. *Materials and Corrosion* **2019**, *70*, 135–148, doi:10.1002/maco.201810221.
2349. Bacca, K.R.G.; Lopes, N.F.; da Costa, E.M. Inhibition of Corrosion of API K55 Steel by Tannin from *Acacia Mearnsii* Bark in Highly Acidic Medium. *Materials and Corrosion* **2022**, *73*, 613–622, doi:10.1002/maco.202112744.
2350. Benedetti, A.; Castelli, F.; Stifanese, R.; Traverso, P.; Faimali, M.; Bergo, A.; Delucchi, M. Cathodic Disbonding Tests Operating at Large Cathodic Potentials for Long Periods Need Current Monitoring, PH Control and Anode Isolation. *Materials and Corrosion* **2022**, doi:10.1002/maco.202213281.
2351. Boschmann Käthler, C.; Ebell, G.; Keßler, S.; Schiegg, Y.; Dauberschmidt, C.; Angst, U.M. A Comparison of Methods to Assess the Resistance of Reinforcing Steel against Chloride-Induced Corrosion in Concrete—Particular Consideration of 12% Chromium Steel. *Materials and Corrosion* **2022**, *73*, 306–325, doi:10.1002/maco.202112826.
2352. Calvillo Solís, J.J.; Galicia Garcia, M. Electrochemical Behavior of Zn-REP Nanohybrid Coatings during Marine *Shewanella* Sp. Biofilm Formation. *Materials and Corrosion* **2021**, doi:10.1002/maco.202011997.
2353. Chakraborty, S.; Pandit, A.; Sarkar, K.; Rani, N. Influence of Cathodic Polarity during Electrocleaning Process on the Brown Stain Defect Formation after Skin Pass on Cold-Rolled Close Annealed Steel. *Materials and Corrosion* **2020**, *71*, 1500–1511, doi:10.1002/maco.202011596.
2354. Diguet, G.; Miyauchi, H.; Takeda, S.; Uchimoto, T.; Mary, N.; Takagi, T.; Abe, H. EMAR Monitoring System Applied to the Thickness Reduction of Carbon Steel in a Corrosive Environment. *Materials and Corrosion* **2022**, *73*, 658–668, doi:10.1002/maco.202112915.
2355. Diler, E.; Leblanc, V.; Gueuné, H.; Larché, N.; Deydier, V.; Linard, Y.; Crusset, D.; Thierry, D. Potential Influence of Microorganisms on the Corrosion of Carbon Steel in the French High- and Intermediate-Level Long-Lived Radioactive Waste Disposal Context. *Materials and Corrosion* **2021**, *72*, 218–234,

- doi:10.1002/maco.202011779.
2356. Huang, J.; Meng, X.; Zheng, Z.; Gao, Y. Optimization of the Atmospheric Corrosivity Mapping of Guangdong Province. *Materials and Corrosion* **2019**, *70*, 91–101, doi:10.1002/maco.201810306.
2357. Li, K.; Zeng, Y.; Luo, J.-L. Condensed Phase Corrosion of P91 and DSS 2205 Steels at Advanced Oxygen-Fired Pressurized Fluidized Bed Combustion Plants. *Materials and Corrosion* **2021**, *72*, 757–771, doi:10.1002/maco.202011882.
2358. Qin, H.; Du, Y.; Lu, M.; Sun, X.; Zhang, Y. Experimental Study on the Corrosion Behavior of X70 Steel under Asymmetric Dynamic DC Interference. *Materials and Corrosion* **2020**, *71*, 1856–1871, doi:10.1002/maco.202011725.
2359. Refait, P.; Jeannin, M.; François, E.; Sabot, R.; Grolleau, A.-M. Galvanic Corrosion in Marine Environments: Effects Associated with the Inversion of Polarity of Zn/Carbon Steel Couples. *Materials and Corrosion* **2019**, *70*, 950–961, doi:10.1002/maco.201810568.
2360. Sanaei, S.; Atapour, M.; Kermanpur, A. Characterization and Corrosion Evaluation of High-Entropy  $\text{Ti}_{0.5}\text{Nb}_{0.5}\text{MnMo}_{0.5}\text{Zr}_{0.3}$  ( $x = 0.5, 0.75, 1$ ) Thin Films for Biomedical Applications. *Materials and Corrosion* **2022**, doi:10.1002/maco.202213480.
2361. Schott, T.; Liautaud, F. Monitoring and Mitigating Corrosion in Geothermal Systems. *Materials and Corrosion* **2022**, doi:10.1002/maco.202213359.
2362. Seechurn, Y.; Surnam, B.Y.R.; Wharton, J.A. Marine Atmospheric Corrosion of Carbon Steel in the Tropical Microclimate of Port Louis. *Materials and Corrosion* **2022**, *73*, 1474–1489, doi:10.1002/maco.202112871.
2363. Senior, N.A.; Martino, T.; Diomidis, N. The Anoxic Corrosion Behaviour of Carbon Steel in Anoxic Alkaline Environments Simulating a Swiss L/ILW Repository Environment. *Materials and Corrosion* **2021**, *72*, 131–140, doi:10.1002/maco.202011780.
2364. Serdar, M.; Carević, I.; Nardin, M.; Štirmer, N. Corrosion Behaviour of Steel in Mortar with Wood Biomass Ash. *Materials and Corrosion* **2020**, *71*, 767–776, doi:10.1002/maco.202011546.
2365. Shoja, S.M.R.; Abdouss, M.; Miran Beigi, A.A. Corrosion Inhibiting Performance of Novel Imidazolium-Based Ionic Liquids as an Efficient and Green Corrosion Constraint for Carbon Steel in Neutral Chloride Solution. *Materials and Corrosion* **2022**, *73*, 623–640, doi:10.1002/maco.202112751.
2366. Silva, P.N.; Svenningsen, G.; Dugstad, A.; Gomes, J.A.C.P. The Effect of Oxygen on the CO<sub>2</sub> Corrosion of Tensile Wires in Simulated Annulus Environments of Flexible Pipes. *Materials and Corrosion* **2022**, *73*, 669–686, doi:10.1002/maco.202112787.
2367. Švábenská, E.; Roupcová, P.; Vondráček, M.; Lashin, A.R.; Schneeweis, O. High Temperature Corrosion of Fe-6 Wt% Si Steel in Various Atmospheres. *Materials and Corrosion* **2019**, *70*, 593–604, doi:10.1002/maco.201810382.
2368. Talus, A.; Kinnunen, H.; Norling, R.; Enestam, S. Corrosion of Carbon Steel

- underneath a Lead/Potassium Chloride Salt Mixture. *Materials and Corrosion* **2019**, *70*, 1450–1460, doi:10.1002/maco.201810650.
2369. Ura-Bińczyk, E.; Dobkowska, A.; Andrzejczuk, M.; Roguska, A.; Mazurkiewicz, B.; Solarski, W.; Balcer, M.; Lewandowska, M.; Banaś, J. Application of LPR and EIS Techniques for On-Site Corrosion Monitoring at the Geothermal Plant in Central Poland. *Materials and Corrosion* **2021**, *72*, 1518–1528, doi:10.1002/maco.202112340.
2370. Vieira Casanova Monteiro, M.; Pessu, F.; Barker, R.; Antônio da Cunha Ponciano Gomes, J.; Neville, A. Analysis of the Use of Environmentally Friendly Corrosion Inhibitors for Mild Steel in a Carbon Dioxide Saturated Chloride Solution via Experimental Design. *Materials and Corrosion* **2019**, *70*, 377–389, doi:10.1002/maco.201810407.
2371. Zausinger, C.; Osterminski, K.; Gehlen, C. Transient and Gradient Analyses of Depolarization Criteria. Valuable Tools in Chloride-Induced Rebar Corrosion Monitoring. *Materials and Corrosion* **2022**, *73*, 932–939, doi:10.1002/maco.202112839.
2372. Zhong, H.; Shi, Z.; Jiang, G.; Song, Y.; Yuan, Z. Development of Microbially Influenced Corrosion on Carbon Steel in a Simulated Water Injection System. *Materials and Corrosion* **2019**, *70*, 1826–1836, doi:10.1002/maco.201910873.
2373. Léonard, A.F.; Job, N. Safe and Green Li-Ion Batteries Based on LiFePO<sub>4</sub> and Li<sub>4</sub>Ti<sub>5</sub>O<sub>12</sub> Sprayed as Aqueous Slurries with Xanthan Gum as Common Binder. *Materials Today Energy* **2019**, *12*, 168–178, doi:10.1016/j.mtener.2019.01.008.
2374. Licht, S.; Liu, X.; Licht, G.; Wang, X.; Swesi, A.; Chan, Y. Amplified CO<sub>2</sub> Reduction of Greenhouse Gas Emissions with C<sub>2</sub>CNT Carbon Nanotube Composites. *Materials Today Sustainability* **2019**, *6*, doi:10.1016/j.mtsust.2019.100023.
2375. Parsons, S.; Poyntz-Wright, O.; Kent, A.; McManus, M.C. Green Chemistry for Stainless Steel Corrosion Resistance: Life Cycle Assessment of Citric Acid versus Nitric Acid Passivation. *Materials Today Sustainability* **2019**, *3–4*, doi:10.1016/j.mtsust.2019.01.001.
2376. Gribkov, V.A.; Borovitskaya, I.V.; Demina, E.V.; Kazilin, E.E.; Latyshev, S.V.; Maslyaev, S.A.; Pimenov, V.N.; Laas, T.; Paduch, M.; Rogozhkin, S.V. Application of Dense Plasma Focus Devices and Lasers in the Radiation Material Sciences for the Goals of Inertial Fusion beyond Ignition. *Matter and Radiation at Extremes* **2020**, *5*, doi:10.1063/5.0005852.
2377. Cheng, H.; Zhou, R.; Yao, Z.; Ju, X.; Wang, X. Study on Shaft Damage Control Technology of Water Inrush and Sand Burst in Drilling Process with Thick Topsoil and Thin Bedrock. *Meitan Kexue Jishu/Coal Science and Technology (Peking)* **2021**, *49*, 176–185, doi:10.13199/j.cnki.cst.2021.04.021.
2378. Qiao, Y.; Meng, Z.; Zhu, S.; Chen, J.; Liu, L.; Zhang, Y. Study on Coal Pillar Failure Mechanism and Surrounding Rock Control Technology under Influence of Secondary Mining. *Meitan Kexue Jishu/Coal Science and Technology (Peking)* **2020**, *48*, 71–77, doi:10.13199/j.cnki.cst.2020.06.008.

2379. Zhang, X.; Guo, H.; Ma, H.; Che, W.; Pan, G.; Zhang, C.; Zhao, Y.; Zhang, Y.; Mao, Q.; Fan, H.; et al. Research and Application of Green Evaluation Method for Shearer Based on Life Cycle. *Meitan Kexue Jishu/Coal Science and Technology (Peking)* **2021**, *49*, 205–212, doi:10.13199/j.cnki.cst.2021.06.024.
2380. Zhou, H.; Huang, Q. Study on the Law of Roof Breakage and Mine Pressure Passing Large Cross-Section Gob Group in the Fully-Mechanized Face with High Mining Height. *Meitan Kexue Jishu/Coal Science and Technology (Peking)* **2020**, *48*, 70–79, doi:10.13199/j.cnki.cst.2020.02.008.
2381. Cao, B.; Qian, F.; Liu, Z.; Wang, L.; Xu, B.; Huang, N.; Wu, H. Flow Field Simulation and Structure Optimization on Desulfurization-Dust Removal-Denitrification System of Sintering Flue Gas. *Meitan Xuebao/Journal of the China Coal Society* **2020**, *45*, 3589–3599, doi:10.13225/j.cnki.jccs.2019.0998.
2382. Chen, F.; Wang, S.; Yu, H.; Chen, R.; Yang, Y.; Lu, S. Technological Innovation Paths of Coal Industry for Achieving Carbon Neutralization. *Meitan Xuebao/Journal of the China Coal Society* **2022**, *47*, 1452–1461, doi:10.13225/j.cnki.jccs.2022.0192.
2383. Gao, M.; He, Y.; Lu, C.; Shao, X.; Yang, Z. Coordination Mechanism of Internal Strong Active Support, Soft Structure Pressure Relief and Anti-Punching of Roadway. *Meitan Xuebao/Journal of the China Coal Society* **2020**, *45*, 2749–2759, doi:10.13225/j.cnki.jccs.2020.0427.
2384. Jiang, P.; Kang, H.; Wang, Z.; Liu, Q.; Yang, J.; Gao, F.; Wang, X.; Zhang, Q.; Zheng, Y.; Wang, H. Principle, Technology and Application of Soft Rock Roadway Strata Control by Means of “Rock Bolting, U-Shaped Yielding Steel Arches and Back Filling” in Synergy in 1 000 m Deep Coal Mines. *Meitan Xuebao/Journal of the China Coal Society* **2020**, *45*, 1020–1035, doi:10.13225/j.cnki.jccs.SJ20.0236.
2385. Li, T.; Kou, Z.; Wu, J.; Wang, Y.; Kou, Y. Monitoring System of the Hoist in the over Kilometer Deep Shaft. *Meitan Xuebao/Journal of the China Coal Society* **2020**, *45*, 1069–1078, doi:10.13225/j.cnki.jccs.ZN20.0324.
2386. Lu, Y.; Peng, Z.; Xia, B.; Yu, P.; Ou, C. Coal and Gas Outburst Multi-Functional Physical Model Testing System of Deep Coal Petrography Engineering. *Meitan Xuebao/Journal of the China Coal Society* **2020**, *45*, 272–283, doi:10.13225/j.cnki.jccs.2019.1433.
2387. Wang, L.; Sun, Z.; Zhou, J.; Zhang, B.; Li, H.; Yang, Z.; Zhai, Q. Field Test and Calculation Analysis on Mechanics Characteristics of Double-Shield TBM Tunnel Segments in Urban Subway. *Meitan Xuebao/Journal of the China Coal Society* **2019**, *44*, 502–508, doi:10.13225/j.cnki.jccs.2019.0795.
2388. Wen, Z.; Jiang, P.; Jing, S.; Cao, Z.; Guan, Y. Development and Verification of Simulation Testing System for Floor Seepage in Coal Mine Underground Reservoir. *Meitan Xuebao/Journal of the China Coal Society* **2021**, *46*, 1487–1497, doi:10.13225/j.cnki.jccs.ST20.1601.
2389. de Araujo, G.R.; de Deco-Souza, T.; Morato, R.G.; Crawshaw, P.G., Jr.; da Silva, L.C.; Jorge-Neto, P.N.; Csermak-Jr, A.C.; Bergo, L.C.F.; Kantek, D.L.Z.; Miyazaki,



- S.S.; et al. Use of Foot Snares to Capture Large Felids. *Methods in Ecology and Evolution* **2021**, *12*, 322–327, doi:10.1111/2041-210X.13516.
2390. Saha, S.; Sarkar, S.; Sinha, A. Use of Basic Oxygen Furnace (BOF) Steel Slag for Acid Mine Drainage Treatment: A Laboratory Study. *Mine Water and the Environment* **2019**, *38*, 517–527, doi:10.1007/s10230-019-00615-3.
2391. Bocharov, V.A.; Ignatkina, V.A.; Abrytin, D.V.; Kayumov, A.A.; Kayumova, V.R. Adjustment of Electrode Processes to Build up Contrast Processing Characteristics of Sulfides. *Mining Informational and Analytical Bulletin* **2022**, 39–50, doi:10.25018/0236\_1493\_2022\_10\_0\_39.
2392. Galkin, V.I. Assessment of Conveyor Belt Monitoring Systems in Mining. *Mining Informational and Analytical Bulletin* **2019**, *2019*, 166–174, doi:10.25018/0236-1493-2019-03-0-166-174.
2393. Moldenhauer, P.; Linderholm, C.; Rydén, M.; Lyngfelt, A. Avoiding CO<sub>2</sub> Capture Effort and Cost for Negative CO<sub>2</sub> Emissions Using Industrial Waste in Chemical-Looping Combustion/Gasification of Biomass. *Mitigation and Adaptation Strategies for Global Change* **2020**, *25*, 1–24, doi:10.1007/s11027-019-9843-2.
2394. Feretti, D.; Pedrazzani, R.; Ceretti, E.; Dal Grande, M.; Zerbini, I.; Viola, G.C.V.; Gelatti, U.; Donato, F.; Zani, C. “Risk Is in the Air”: Polycyclic Aromatic Hydrocarbons, Metals and Mutagenicity of Atmospheric Particulate Matter in a Town of Northern Italy (Respira Study). *Mutation Research - Genetic Toxicology and Environmental Mutagenesis* **2019**, *842*, 35–49, doi:10.1016/j.mrgentox.2018.11.002.
2395. Domin, J.; Piechota, M.; Czechowicz, D.; Skutil, K. Assessment of the Amount of Hydrocarbon Emissions to the Atmosphere during Handling and Storage of Diesel Fuel in Fixed Roof Tanks. *Nafta - Gaz* **2020**, *2020*, 192–204, doi:10.18668/NG.2020.03.06.
2396. Minor, T. Analysis of the Corrosion Rate on the Basis of Corrosion Tests of Corrosion Sensors Installed in the Ground. *Nafta - Gaz* **2022**, *2022*, 618–629, doi:10.18668/NG.2022.08.06.
2397. Stochaj, P. Cathodic Disbondment of Coating on the Basis of Field and Laboratory Tests - Phenomenon Analysis. *Nafta - Gaz* **2019**, *2019*, 482–488, doi:10.18668/NG.2019.08.05.
2398. Guan, X.; Xu, B.; Wu, M.; Jing, T.; Yang, Y.; Gao, Y. Breathable, Washable and Wearable Woven-Structured Triboelectric Nanogenerators Utilizing Electrospun Nanofibers for Biomechanical Energy Harvesting and Self-Powered Sensing. *Nano Energy* **2021**, *80*, doi:10.1016/j.nanoen.2020.105549.
2399. Liu, Y.; Zhao, W.; Liu, G.; Bu, T.; Xia, Y.; Xu, S.; Zhang, C.; Zhang, H. Self-Powered Artificial Joint Wear Debris Sensor Based on Triboelectric Nanogenerator. *Nano Energy* **2021**, *85*, doi:10.1016/j.nanoen.2021.105967.
2400. Xie, Y.; Hu, J.; Li, H.; Mi, H.-Y.; Ni, G.; Zhu, X.; Jing, X.; Wang, Y.; Zheng, G.; Liu, C.; et al. Green Fabrication of Double-Sided Self-Supporting Triboelectric Nanogenerator with High Durability for Energy Harvesting and Self-Powered Sensing. *Nano Energy* **2022**, *93*, doi:10.1016/j.nanoen.2021.106827.

2401. Rangrazian, M.; Madandoust, R.; Mahjoub, R.; Raftari, M. Reduction of CO<sub>2</sub> Environmental Pollution from Concrete, by Adding Local Mineral Pozzolan as a Part of Cement Replacement in Concrete: A Case Study on Engineering Properties. *Nanotechnology for Environmental Engineering* **2022**, doi:10.1007/s41204-022-00288-4.
2402. Meng, T.; Lian, S.; Yang, X.; Meng, R. Effects of Nano-Modified Polymer Cement-Based Materials on the Bending Behavior of Repaired Concrete Beams. *Nanotechnology Reviews* **2021**, *10*, 292–303, doi:10.1515/ntrev-2021-0024.
2403. Meng, T.; Zhang, J.; Wei, H.; Shen, J. Effect of Nano-Strengthening on the Properties and Microstructure of Recycled Concrete. *Nanotechnology Reviews* **2020**, *9*, 79–92, doi:10.1515/ntrev-2020-0008.
2404. Zhang, L.; He, M.; Zhang, L. Influence of 800 KV UHVDC in Earth on Buried Steel Line Pipes. *Natural Gas Industry* **2019**, *39*, 134–138, doi:10.3787/j.issn.1000-0976.2019.12.017.
2405. Hu, T.; Guo, J. Development and Application of New Technologies and Equipment for In-Line Pipeline Inspection. *Natural Gas Industry B* **2019**, *6*, 404–411, doi:10.1016/j.ngib.2019.01.017.
2406. Luo, J.; Luo, S.; Li, L.; Zhang, L.; Wu, G.; Zhu, L. Stress Corrosion Cracking Behavior of X90 Pipeline Steel and Its Weld Joint at Different Applied Potentials in Near-Neutral Solutions. *Natural Gas Industry B* **2019**, *6*, 138–144, doi:10.1016/j.ngib.2018.08.002.
2407. Wang, M.; Zhang, L.; Su, X.; Lei, Y.; Shen, Q.; Wei, W.; Wang, M. Assessing the Technology Impact for Industry Carbon Density Reduction in China Based on C3IAM-Tice. *Natural Hazards* **2019**, *99*, 1455–1468, doi:10.1007/s11069-018-3484-8.
2408. Jia, J.; Yang, J.; Song, Y.; Chen, H.; Zhang, X. Development of Emissions Inventory and Pollution Classification for Energy-Intensive Heavy Metal Industries in A Densely Distributed Area. *Nature Environment and Pollution Technology* **2021**, *20*, 317–328, doi:10.46488/NEPT.2021.V20I01.036.
2409. Liu, W. Performance of New Permeable Concrete Materials Based on Mechanical Strength. *Nature Environment and Pollution Technology* **2019**, *18*, 1683–1689.
2410. Pandulu, G.; Jayaseelan, R.; Priya, M. Application of Recycled Coarse Aggregate in Steel Tubular Members. *Nature Environment and Pollution Technology* **2020**, *19*, 729–737, doi:10.46488/NEPT.2020.V19I02.028.
2411. Ramprasad, C.; Sona, K.; Afridhi, M.; Kumar, R.; Gopalakrishnan, N. Comparative Study on the Treatment of Landfill Leachate by Coagulation and Electrocoagulation Processes. *Nature Environment and Pollution Technology* **2019**, *18*, 845–856.
2412. Daehn, K.; Basuhi, R.; Gregory, J.; Berlinger, M.; Somjit, V.; Olivetti, E.A. Innovations to Decarbonize Materials Industries. *Nature Reviews Materials* **2022**, *7*, 275–294, doi:10.1038/s41578-021-00376-y.
2413. Bo, X.; Jia, M.; Xue, X.; Tang, L.; Mi, Z.; Wang, S.; Cui, W.; Chang, X.; Ruan, J.; Dong, G.; et al. Effect of Strengthened Standards on Chinese Ironmaking and

- Steelmaking Emissions. *Nature Sustainability* **2021**, *4*, 811–820, doi:10.1038/s41893-021-00736-0.
2414. Churkina, G.; Organschi, A.; Reyer, C.P.O.; Ruff, A.; Vinke, K.; Liu, Z.; Reck, B.K.; Graedel, T.E.; Schellnhuber, H.J. Buildings as a Global Carbon Sink. *Nature Sustainability* **2020**, *3*, 269–276, doi:10.1038/s41893-019-0462-4.
2415. Li, Z.; Chen, C.; Xie, H.; Yao, Y.; Zhang, X.; Brozena, A.; Li, J.; Ding, Y.; Zhao, X.; Hong, M.; et al. Sustainable High-Strength Macrofibres Extracted from Natural Bamboo. *Nature Sustainability* **2022**, *5*, 235–244, doi:10.1038/s41893-021-00831-2.
2416. Poncelet, A.; Helbig, C.; Loubet, P.; Beylot, A.; Muller, S.; Villeneuve, J.; Laratte, B.; Thorenz, A.; Tuma, A.; Sonnemann, G. Losses and Lifetimes of Metals in the Economy. *NATURE SUSTAINABILITY* **2022**, *5*, 717–726, doi:10.1038/s41893-022-00895-8.
2417. Wei, W.; Li, J.; Chen, B.; Wang, M.; Zhang, P.; Guan, D.; Meng, J.; Qian, H.; Cheng, Y.; Kang, C.; et al. Embodied Greenhouse Gas Emissions from Building China's Large-Scale Power Transmission Infrastructure. *Nature Sustainability* **2021**, *4*, 739–747, doi:10.1038/s41893-021-00704-8.
2418. Sabirov, R.A.; Poteshkin, P.V.; Avrenyuk, A.N.; Yakimov, V.M.; Filipovich, S.S. The Direction of Research to Ensure the Completeness and Reliability Conclusions about the Technical Condition of Buildings. *Neftyanoe Khozyaystvo - Oil Industry* **2019**, *2019*, 141–144, doi:10.24887/0028-2448-2019-8-141-144.
2419. Savelev, V.V.; Avdeev, A.S.; Ivanov, A.N.; Bovt, A.V.; Mikhailov, A.I. Corrosion Activity of Transported Fluids and Implementation of Technical Solutions to Protect Vietsovpetro Offshore Pipelines. *Neftyanoe Khozyaystvo - Oil Industry* **2022**, *2022*, 102–105, doi:10.24887/0028-2448-2022-2-102-105.
2420. Tigulev, E.A.; Kantemirov, I.F.; Raspopov, A.A.; Yamilov, M.Z. The Stress State Study of Mechanically Inhomogeneous Welded Joints of Trunk Pipelines with a Surface Crack-like Defect. *Neftyanoe Khozyaystvo - Oil Industry* **2021**, *2021*, 122–126, doi:10.24887/0028-2448-2021-5-122-126.
2421. Timashev, E.O.; Urazakov, K.R.; Lushnikov, A.V.; Evdokimov, D.K. Optimization of the Technological Mode of Rod Unit with Combined Fiberglass Rod String. *Neftyanoe Khozyaystvo - Oil Industry* **2021**, *2021*, 57–61, doi:10.24887/0028-2448-2021-1-57-61.
2422. Yamilov, M.Z.; Tigulev, E.A.; Yushin, A.A.; Raspopov, A.A.; Kantemirov, I.F. Evaluating Mechanical Heterogeneity of Pipelines Welded Joints. *Neftyanoe Khozyaystvo - Oil Industry* **2020**, *2020*, 128–131, doi:10.24887/0028-2448-2020-11-128-131.
2423. Abdulhussein, A.T.; Kannarpady, G.K.; Biris, A.S. One-Step Synthesis of a Steel-Polymer Wool for Oil-Water Separation and Absorption. *npj Clean Water* **2019**, *2*, doi:10.1038/s41545-019-0034-1.
2424. Lee, M.K.B.; Ward, N.D.; Leach, M.; Kent, R. A Resonant Electro-Physical Transmutation Method for Water Purification. *npj Clean Water* **2022**, *5*, doi:10.1038/s41545-022-00179-w.

2425. Ai, L.; Soltangharai, V.; Ziehl, P. Evaluation of ASR in Concrete Using Acoustic Emission and Deep Learning. *Nuclear Engineering and Design* **2021**, *380*, doi:10.1016/j.nucengdes.2021.111328.
2426. Ebrahim, S.A.; Cheung, F.-B.; Bajorek, S.M.; Tien, K.; Hoxie, C.L. Heat Transfer Correlation for Film Boiling during Quenching of Micro-Structured Surfaces. *Nuclear Engineering and Design* **2022**, *398*, doi:10.1016/j.nucengdes.2022.111943.
2427. Jiménez, S.; Cornejo, A.; Barbu, L.G.; Oller, S.; Barbat, A.H. Analysis of the Mock-up of a Reactor Containment Building: Comparison with Experimental Results. *Nuclear Engineering and Design* **2020**, *359*, doi:10.1016/j.nucengdes.2019.110454.
2428. Li, C.; Shu, G.; Xu, B.; Liu, Y.; Chen, J.; Liu, W. Effects of Neutron Irradiation on Magnetic Properties of Reactor Pressure Vessel Steel. *Nuclear Engineering and Design* **2019**, *342*, 128–132, doi:10.1016/j.nucengdes.2018.11.029.
2429. Markou, G.; Genco, F. Seismic Assessment of Small Modular Reactors: NuScale Case Study for the 8.8 Mw Earthquake in Chile. *Nuclear Engineering and Design* **2019**, *342*, 176–204, doi:10.1016/j.nucengdes.2018.12.002.
2430. Sposito, A.; Heaps, E.; Sutton, G.; Machin, G.; Bernard, R.; Clarke, S. Phosphor Thermometry for Nuclear Decommissioning and Waste Storage. *Nuclear Engineering and Design* **2021**, *375*, doi:10.1016/j.nucengdes.2021.111091.
2431. Xin, F.; Ma, T.; Chen, Y.; Wang, Q. Study on Chemical Spray Etching of Stainless Steel for Printed Circuit Heat Exchanger Channels. *Nuclear Engineering and Design* **2019**, *341*, 91–99, doi:10.1016/j.nucengdes.2018.10.022.
2432. Dib, G.; Roy, S.; Ramuhalli, P.; Chai, J. In-Situ Fatigue Monitoring Procedure Using Nonlinear Ultrasonic Surface Waves Considering the Nonlinear Effects in the Measurement System. *Nuclear Engineering and Technology* **2019**, *51*, 867–876, doi:10.1016/j.net.2018.12.003.
2433. Gutiérrez-Vargas, G.; Ruiz, A.; Kim, J.-Y.; López-Morelos, V.H.; Ambriz, R.R. Evaluation of Thermal Embrittlement in 2507 Super Duplex Stainless Steel Using Thermoelectric Power. *Nuclear Engineering and Technology* **2019**, *51*, 1816–1821, doi:10.1016/j.net.2019.05.017.
2434. Oh, S.-B.; Kim, J.; Lee, J.-Y.; Kim, D.-J.; Kim, K.-M. Analysis of Pipe Thickness Reduction According to PH in FAC Facility with In Situ Ultrasonic Measurement Real Time Monitoring. *Nuclear Engineering and Technology* **2022**, *54*, 186–192, doi:10.1016/j.net.2021.07.048.
2435. Ryu, K.; Lee, T.; Baek, D.-C.; Park, J.-W. Pipe Thinning Model Development for Direct Current Potential Drop Data with Machine Learning Approach. *Nuclear Engineering and Technology* **2020**, *52*, 784–790, doi:10.1016/j.net.2019.10.004.
2436. Yan, J.; Zhou, W.; Zhang, X.; Lin, Y. Interface Monitoring of Steel-Concrete-Steel Sandwich Structures Using Piezoelectric Transducers. *Nuclear Engineering and Technology* **2019**, *51*, 1132–1141, doi:10.1016/j.net.2019.01.013.
2437. Cao, Z.; An, Y.; Wang, Z.; Guo, L.; Chen, C.; Gou, F.; Li, Y. Improved Internal Standard LIBS Method Used in CLF-1 Exposure to Liquid Lithium. *Nuclear Materials and Energy* **2020**, *24*, doi:10.1016/j.nme.2020.100786.

2438. de Castro, A.; Moynihan, C.; Stemmley, S.; Szott, M.; Andruczyk, D.; Ruzic, D.N. Exploration of Sn70Li30 Alloy as Possible Material for Flowing Liquid Metal Plasma Facing Components. *Nuclear Materials and Energy* **2020**, *25*, doi:10.1016/j.nme.2020.100829.
2439. Kashaykin, P.F.; Tomashuk, A.L.; Vasiliev, S.A.; Ignatyev, A.D.; Shaimerdenov, A.A.; Ponkratov, Y.V.; Kulsartov, T.V.; Kenzhin, Y.A.; Kh. Gizatuln, S.; Zholdybayev, T.K.; et al. Radiation Resistance of Single-Mode Optical Fibres with View to in-Reactor Applications. *Nuclear Materials and Energy* **2021**, *27*, doi:10.1016/j.nme.2021.100981.
2440. Nishijima, D.; Tokitani, M.; Doerner, R.P.; Masuzaki, S.; Miyamoto, M.; Nagata, D.; Tynan, G.R. Enhanced D Retention in RAFM Steel Caused by D Bubbles Formed inside Cr-Rich Surface Layer. *Nuclear Materials and Energy* **2021**, *29*, doi:10.1016/j.nme.2021.101084.
2441. Reinhart, M.; Möller, S.; Kreter, A.; Rasinski, M.; Kuhn, B. Influence of Surface Temperature, Ion Impact Energy, and Bulk Tungsten Content on the Sputtering of Steels: In Situ Observations from Plasma Exposure in PSI-2. *Nuclear Materials and Energy* **2022**, *33*, doi:10.1016/j.nme.2022.101244.
2442. Richardson, M.; Gorley, M.; Wang, Y.; Andres, D.; Dawson, H. Small Punch Creep Investigation of Eurofer97 and 14Cr Oxide Dispersion Strengthened Steel. *Nuclear Materials and Energy* **2021**, *29*, doi:10.1016/j.nme.2021.101067.
2443. Tokitani, M.; Masuzaki, S.; Murase, T.; the LHD Experiment Group. Demonstration of Suppression of Dust Generation and Partial Reduction of the Hydrogen Retention by Tungsten Coated Graphite Divertor Tiles in LHD. *Nuclear Materials and Energy* **2019**, *18*, 23–28, doi:10.1016/j.nme.2018.11.023.
2444. Xu, Y.; Hirooka, Y.; Luo, L.M.; Wu, Y.C. Deuterium Concentration Depth Profiling in Sputter-Deposited Tungsten Coated F82H Using Secondary Ion Mass Spectrometry. *Nuclear Materials and Energy* **2019**, *21*, doi:10.1016/j.nme.2019.100708.
2445. Hall, R.A.; Marshall, W.J.; Eidelpes, E.; Hom, B.M. Assessment of Critical Experiment Benchmark Applicability to a Large-Capacity HALEU Transportation Package Concept. *Nuclear Science and Engineering* **2021**, *195*, 310–319, doi:10.1080/00295639.2020.1801319.
2446. Al Zubaidi, F.N.; Walton, K.L.; Tompson, R.V.; Ghosh, T.K.; Loyalka, S.K. Measurements of Total Hemispherical Emissivity of A508/A533B Alloy Steel. *Nuclear Technology* **2019**, *205*, 951–963, doi:10.1080/00295450.2019.1573618.
2447. Al Zubaidi, F.N.; Walton, K.L.; Tompson, R.V.; Ghosh, T.K.; Loyalka, S.K. The Effect of Long-Term Oxidation on the Total Hemispherical Emissivity of Type 316L Stainless Steel. *Nuclear Technology* **2019**, *205*, 790–800, doi:10.1080/00295450.2018.1542257.
2448. Al Zubaidi, F.N.; Walton, K.L.; Tompson, R.V.; Ghosh, T.K.; Loyalka, S.K. Emissivity of Grade 91 Ferritic Steel: Additional Measurements on Role of Surface Conditions and Oxidation. *Nuclear Technology* **2021**, *207*, 1257–1269,

- doi:10.1080/00295450.2020.1808394.
2449. Fandiño, O.; Cox, J.S.; McGregor, C.; Conrad, J.; Liao, K.; Tremaine, P.R. Carbon Dioxide Contamination of Aqueous Morpholine Solutions and Effects on Secondary Coolant Chemistry Under CANDU Conditions. *Nuclear Technology* **2022**, *208*, 192–201, doi:10.1080/00295450.2020.1862471.
2450. Fukuyama, H.; Higashi, H.; Yamano, H. Thermophysical Properties of Molten Stainless Steel Containing 5 Mass % B4C. *Nuclear Technology* **2019**, *205*, 1154–1163, doi:10.1080/00295450.2019.1578572.
2451. Reed, F.K.; Ericson, M.N.; Ezell, N.D.B.; Kisner, R.A.; Zuo, L.; Zhang, H.; Flammang, R. A 100-Mrad (Si) JFET-Based Sensing and Communications System for Extreme Nuclear Instrumentation Environments. *Nuclear Technology* **2022**, *208*, 1497–1510, doi:10.1080/00295450.2022.2057776.
2452. Smith, J.B.; Byrd, R.C. Estimated Air Emissions Savings from Partially Removing and Reefing the Jacket of a Large California Oil and Gas Platform. *Ocean and Coastal Management* **2021**, *211*, doi:10.1016/j.ocecoaman.2021.105741.
2453. Chen, C.; Wang, Y.; Ge, F. Construction of Corrosion Resistant Stainless Steel Mesh and the Design for Protecting Optical Window Free from Biofouling. *Ocean Engineering* **2022**, *264*, doi:10.1016/j.oceaneng.2022.112564.
2454. Chung, W.C.; Kim, M.; Jin, C. Real-Time Trace of Riser Profile and Stress with Numerical Inclometers. *Ocean Engineering* **2021**, *234*, doi:10.1016/j.oceaneng.2021.109292.
2455. Dai, T.-T.; Jia, Z.-G.; Ren, L.; Wang, Y.-L.; Li, D.-S. Modal Analysis-Based Initial Axial Force Recognition Method for Jacket Platform. *Ocean Engineering* **2022**, *262*, doi:10.1016/j.oceaneng.2022.112279.
2456. Dong, D.T.; Cai, W. A Comparative Study of Life Cycle Assessment of a Panamax Bulk Carrier in Consideration of Lightship Weight. *Ocean Engineering* **2019**, *172*, 583–598, doi:10.1016/j.oceaneng.2018.12.015.
2457. Falconer, S.; Nordgård-Hansen, E.; Grasmø, G. Remaining Useful Life Estimation of HMPE Rope during CBOS Testing through Machine Learning. *Ocean Engineering* **2021**, *238*, doi:10.1016/j.oceaneng.2021.109617.
2458. Fathi, A.; Esfandiari, A.; Fadavie, M.; Mojtahedi, A. Damage Detection in an Offshore Platform Using Incomplete Noisy FRF Data by a Novel Bayesian Model Updating Method. *Ocean Engineering* **2020**, *217*, doi:10.1016/j.oceaneng.2020.108023.
2459. Li, M.; Kefal, A.; Cerik, B.C.; Oterkus, E. Dent Damage Identification in Stiffened Cylindrical Structures Using Inverse Finite Element Method. *Ocean Engineering* **2020**, *198*, doi:10.1016/j.oceaneng.2020.106944.
2460. Li, X.; Guo, M.; Zhang, R.; Chen, G. A Data-Driven Prediction Model for Maximum Pitting Corrosion Depth of Subsea Oil Pipelines Using SSA-LSTM Approach. *Ocean Engineering* **2022**, *261*, doi:10.1016/j.oceaneng.2022.112062.
2461. Liu, F.; Hu, Y.; Feng, G.; Li, C. Experimental and Numerical Study on the Penetration of the Inclined Stiffened Plate. *Ocean Engineering* **2022**, *258*,

- doi:10.1016/j.oceaneng.2022.111792.
2462. Lliso-Ferrando, J.R.; Gasch, I.; Martínez-Ibernón, A.; Valcuende, M. Effect of Macrocell Currents on Rebar Corrosion in Reinforced Concrete Structures Exposed to a Marine Environment. *Ocean Engineering* **2022**, *257*, doi:10.1016/j.oceaneng.2022.111680.
2463. Orlikowski, J.; Szociński, M.; Żakowski, K.; Igliński, P.; Domańska, K.; Darowicki, K. Actual Field Corrosion Rate of Offshore Structures in the Baltic Sea along Depth Profile from Water Surface to Sea Bed. *Ocean Engineering* **2022**, *265*, doi:10.1016/j.oceaneng.2022.112545.
2464. Tang, M.; Li, S.; Zhang, H.; Bian, X.; Zhao, X. Monitoring the Slip of Helical Wires in a Flexible Riser under Combined Tension and Bending. *Ocean Engineering* **2022**, *256*, doi:10.1016/j.oceaneng.2022.111512.
2465. Tavasoli, O.; Ghazavi, M. Effect of Tapered and Semi-Tapered Geometry on the Offshore Piles Driving Performance. *Ocean Engineering* **2020**, *201*, doi:10.1016/j.oceaneng.2020.107147.
2466. Yang, P.; Jia, L.; Kang, Z.; Kang, J. Research on Risk Assessment Method of Steel Catenary Riser Based on Information Fusion. *Ocean Engineering* **2022**, *259*, doi:10.1016/j.oceaneng.2022.111890.
2467. Yang, Y.; Huang, R.; He, Z. Experimental Study of the Uniaxial Compressive Behaviour of DH36 Steel Plates with Mechanically Induced Pits. *Ocean Engineering* **2020**, *200*, doi:10.1016/j.oceaneng.2020.107058.
2468. Ye, H.; Li, W.; Lin, S.; Ge, Y.; Han, F.; Sun, Y. Experimental Investigation of Spooling Test on the Multilayer Oceanographic Winch with High-Performance Synthetic Fibre Rope. *Ocean Engineering* **2021**, *241*, doi:10.1016/j.oceaneng.2021.110037.
2469. Zhang, F.; Yang, D.; Qiu, W. Lightweight Design and Experimental Investigation of Codirectional Corrugated Steel Fire Bulkheads on a Cruise Ship. *Ocean Engineering* **2022**, *255*, doi:10.1016/j.oceaneng.2022.111483.
2470. Zhao, Z.; Li, Y.; Tang, Y.; Ji, X. Conceptual Design and Numerical Analysis of a Novel Platform for Marginal Oilfields Development. *Ocean Engineering* **2019**, *187*, doi:10.1016/j.oceaneng.2019.106145.
2471. Zima, B.; Woloszyk, K.; Garbatov, Y. Corrosion Degradation Monitoring of Ship Stiffened Plates Using Guided Wave Phase Velocity and Constrained Convex Optimization Method. *Ocean Engineering* **2022**, *253*, doi:10.1016/j.oceaneng.2022.111318.
2472. Zima, B.; Woloszyk, K.; Garbatov, Y. Experimental and Numerical Identification of Corrosion Degradation of Ageing Structural Components. *Ocean Engineering* **2022**, *258*, doi:10.1016/j.oceaneng.2022.111739.
2473. Bérest, P.; Réveillère, A.; Evans, D.; Stöwer, M. Review and Analysis of Historical Leakages from Storage Salt Caverns Wells. *Oil and Gas Science and Technology* **2019**, *74*, doi:10.2516/ogst/2018093.
2474. Li, Z.; Hanaoka, T. Plant-Level Mitigation Strategies Could Enable Carbon

- Neutrality by 2060 and Reduce Non-CO<sub>2</sub> Emissions in China's Iron and Steel Sector. *One Earth* **2022**, *5*, 932–943, doi:10.1016/j.oneear.2022.07.006.
2475. Tiensuu, H.; Tamminen, S.; Haapala, O.; Rönning, J. Intelligent Methods for Root Cause Analysis behind the Center Line Deviation of the Steel Strip. *Open Engineering* **2020**, *10*, 386–393, doi:10.1515/eng-2020-0041.
2476. Hlinčík, T.; Tenkrát, D.; Šimáček, P. Gas Deposits from Pipeline Cleaning as an Indicator of the Pipeline Condition. *Paliva* **2019**, *11*, 87–93, doi:10.35933/paliva.2019.03.04.
2477. Hickey, C.; Gordon, C.; Galdanes, K.; Blaustein, M.; Horton, L.; Chillrud, S.; Ross, J.; Yinon, L.; Chen, L.C.; Gordon, T. Toxicity of Particles Emitted by Fireworks. *Particle and Fibre Toxicology* **2020**, *17*, doi:10.1186/s12989-020-00360-4.
2478. Guo, Z.-F. Conformity Analysis of Product Performance and Material Standard Requirements of 09MnNiDR Steel Plate. *Petrochemical Equipment* **2022**, *51*, 50–55, doi:10.3969/j.issn.1000-7466.2022.03.010.
2479. Sheng, J.-F.; Wu, X.-G.; Wang, Z.-H.; Wang, Y.-T.; Huang, C.-P.; Zheng, X.-R. An Experimental Method on Mass Fraction Determining of the Arsenic Tin Antimony in Chromium-Molybdenum Steel. *Petrochemical Equipment* **2019**, *48*, 18–21, doi:10.3969/j.issn.1000-7466.2019.02.004.
2480. Sheng, J.-F.; Wu, X.-G.; Wang, Z.-K.; Ma, X.-Q.; Wang, K.-S.; Liu, T.-Q.; Li, Y.; Song, S.-G. A New Method for Simultaneous Determination of 10 Elements in Chromium-Molybdenum Alloy Steel by ICP-AES. *Petrochemical Equipment* **2022**, *51*, 25–28, doi:10.3969/j.issn.1000-7466.2022.01.005.
2481. Nyakuma, B.B.; Jauro, A.; Akinyemi, S.A.; Nasirudeen, M.B.; Oladokun, O.; Bello, A.A.; Ivase, T.J.-P.; Abdullah, T.A.T. Physicochemical Fuel Properties and Carbonization Kinetics of Duduguru Coal. *Petroleum and Coal* **2020**, *62*, 1153–1162.
2482. Ling, Y. Application of Petroleum Coke in Cement Industry and Prospect Analysis. *Petroleum Processing and Petrochemicals* **2020**, *51*, 1–6.
2483. Wang, J.; Sun, F.; Fu, X.; Liang, S. Research and Application of Environmental Friendly Low-Phosphorus Treatment Technology for Circulating Water. *Petroleum Processing and Petrochemicals* **2022**, *53*, 66–69.
2484. Chang, X.; Zhao, B.; Li, C. Energy Saving and Economic Analysis of the Third Generation Integrated Heat Tracing Station. *Petroleum Refinery Engineering* **2021**, *51*, 52–55.
2485. Hu, M. Discussion on Several Issues of Corrosion of Sulfur Recovery Unit. *Petroleum Refinery Engineering* **2020**, *50*, 60–64.
2486. Liu, R. Analysis on Comprehensive Transformation of Heating Furnace in Residue Hydrogenation Unit. *Petroleum Refinery Engineering* **2021**, *51*, 34–38.
2487. Qi, Y. Safety Design of FCC Oxygen Pipe in Oxygen-Enriched Regeneration Technology. *Petroleum Refinery Engineering* **2019**, *49*, 61–64.
2488. Namuq, M.A.; Berro, M.J.; Reich, M. Measurement-While-Milling (MWM): An Innovative Approach for Increasing the Casing Milling Efficiency in Deep Drilling Operations. *Petroleum Research* **2022**, doi:10.1016/j.ptlrs.2022.09.003.



2489. Wang, X.; Shuai, J.; Zhang, S.-Z.; Ren, W.; Zhu, X.-M. Numerical Study on the Strain Capacity of Girth-Welded X80 Grade Pipes. *Petroleum Science* **2022**, doi:10.1016/j.petsci.2022.04.009.
2490. Burnette, M.; Staack, D. Development of a Substrate-Invariant 2-D Array of Nanosecond-Pulsed Streamer Discharges. *Plasma Research Express* **2020**, *2*, doi:10.1088/2516-1067/ab640f.
2491. Pauna, H.; Willms, T.; Aula, M.; Echterhof, T.; Huttula, M.; Fabritius, T. Cyanide Recombination in Electric Arc Furnace Plasma. *Plasma Research Express* **2021**, *3*, doi:10.1088/2516-1067/abfc2a.
2492. Ganeshprabhu, P.; Chandrasekaran, P.; Sheerin Farzana, A. Engineering Behaviour of Sustainable Concrete with Steel Mill Scale. *Polish Journal of Environmental Studies* **2021**, *30*, 1129–1137, doi:10.15244/pjoes/124895.
2493. Liu, R.; He, F.; Chen, L. Can Energy Management Systems Improve the Performance of Industrial Enterprises? *Polish Journal of Environmental Studies* **2021**, *30*, 5133–5147, doi:10.15244/pjoes/134850.
2494. Meng, X.; Chen, H.; Wu, M. Pollution Characteristics of Polycyclic Aromatic Hydrocarbons in Unsaturated Zone of the Different Workshops at a Large Iron and Steel Industrial Site of Beijing, China. *Polish Journal of Environmental Studies* **2020**, *30*, 781–792, doi:10.15244/pjoes/123920.
2495. Daryabeigi Zand, A.; Rabiee Abyaneh, M.; Hoveidi, H. Capability of Reused Waste from Aluminum Industry (Red Mud) in Iran to Improve Compressive Strength of Loose Soil. *Pollution* **2019**, *5*, 411–418, doi:10.22059/poll.2018.261145.472.
2496. Biswal, T.; Swain, P.K.; Panda, R.B. Solid Waste Generation in the Rourkela Steel Plant, Its Recycling and Eco-Utilization. *Pollution Research* **2019**, *38*, 182–191.
2497. Rudenky, S.G.; Kartzev, N.F.; Korneev, A.A.; Kunchenko, A.V.; Kunchenko, Y.V.; Marinin, V.G.; Martynenko, L.I.; Kovalenko, V.I.; Bortnytska, M.O.; Ryzhova, T.P.; et al. Properties of 15cr12wnimov Steel after Vacuum Activated Chromium Plating of Its Surface. *Problems of Atomic Science and Technology* **2021**, *132*, 129–135, doi:10.46813/2021-132-129.
2498. Shirokov, B.M.; Malykhin, D.G.; Zhuravlyov, A.Yu. STRUCTURAL STABILITY OF Ti-N AND Zr-N COATINGS AT EMISSION TESTS IN MODE OF PULSES. *Problems of Atomic Science and Technology* **2022**, *140*, 120–124, doi:10.46813/2022-140-120.
2499. Cama, G.; Lakatos, A.N.; Testa, C.; Giadagnuolo, V.; Bertino, A. Introduction of Photocatalytic Surfaces to Minimize Air Pollution in Iron and Steel Sectors. *Procedia Environmental Science, Engineering and Management* **2019**, *6*, 32–36.
2500. Cannata, G.; Amato, V.; Amato, D.; Spitaleri, G.; Bertino, A.; Guadagnolo, V. New Circular Economy Views in the Sicilian Iron Metallurgical Sector: Recovery and Surplus Value of Precious Materials from the Metal Melting Process. *Procedia Environmental Science, Engineering and Management* **2019**, *6*, 37–44.
2501. Cardellicchio, F. Atmospheric Emission of Dioxins and Related Compounds from

- Iron Ore Sintering Processes. *Procedia Environmental Science, Engineering and Management* **2020**, *7*, 61–68.
2502. Cardellicchio, F. PROSPECTS FOR REDUCTION ATMOSPHERIC EMISSIONS FROM IRON AND STEEL PLANTS. *Procedia Environmental Science, Engineering and Management* **2021**, *8*, 613–621.
2503. Fichera, S.S.; Arfò, S.; Huang, Y.L.; Matarazzo, A.; Bertino, A. Circular Economy and Technological Innovation in Steel Industry. *Procedia Environmental Science, Engineering and Management* **2020**, *7*, 9–17.
2504. Huang, Y.L.; Bella, V.D.; Magnano, I.; Harryson, S.; Sciuto, G. Industrial Symbiosis-Based Renewable Energy: A Sustainable Way to Draw Advantages from Sicily's Sun and Wind. *Procedia Environmental Science, Engineering and Management* **2019**, *6*, 149–157.
2505. Romanello, D.G.; Caramagno, F.; Zerbo, A.; Guadagnuolo, V.; Bertino, A. New Information Technology Models to Support Proper and Effective Business Management to Improve the Transition to the Circular Economy. *Procedia Environmental Science, Engineering and Management* **2020**, *7*, 45–51.
2506. Rosa, K.; Kocharyan, G. Environmental Impact of Steel Industry: Empirical Study. *Procedia Environmental Science, Engineering and Management* **2020**, *7*, 435–444.
2507. Sachdeva, A.; Sharma, A. Effective Waste Utilization in Production of Concrete. *Procedia Environmental Science, Engineering and Management* **2019**, *6*, 501–511.
2508. Shatokha, V.; Matukhno, E. CLIMATE CHANGE MITIGATION SCENARIOS FOR THE UKRAINIAN STEEL SECTOR BASED ON BEST AVAILABLE TECHNOLOGIES DEPLOYMENT\*. *Procedia Environmental Science, Engineering and Management* **2021**, *8*, 507–517.
2509. Ventura, M.R.; Pecorino, F.; Saia, N.; Matarazzo, A.; Bertino, A. Environmental Performance Indicators Regarding Thewater System in a Leader Sicilian Steel Industry. *Procedia Environmental Science, Engineering and Management* **2019**, *6*, 269–274.
2510. Hammond, G.P. The UK Industrial Decarbonisation Strategy Revisited. *Proceedings of Institution of Civil Engineers: Energy* **2022**, *175*, 30–44, doi:10.1680/jener.21.00056.
2511. Selimli, S.; Sunay, S. Feasibility Study of the Energy and Economic Gain That Can Be Achieved by Driving the Boiler Feedwater Pump with a Backpressure Steam Turbine. *Proceedings of the Institution of Mechanical Engineers, Part A: Journal of Power and Energy* **2021**, *235*, 1254–1266, doi:10.1177/0957650920969466.
2512. Sinha, R.K.; Chaturvedi, N.D. Multi-Criteria Decision-Making in Carbon-Constrained Scenario for Sustainable Production Planning. *Process Integration and Optimization for Sustainability* **2021**, *5*, 905–917, doi:10.1007/s41660-021-00187-2.
2513. Tien, D.H.; Van Bong, P.; Hung, L.T. Applying Improved Fuzzy Grey Relation Analysis Algorithm in Multi-Objective Optimization for High-Speed Milling of 4Cr5MoSiV Steel. *Process Integration and Optimization for Sustainability* **2022**, *6*, 587–601, doi:10.1007/s41660-022-00238-2.

2514. Agyeman, P.C.; JOHN, K.; Kebonye, N.M.; Ofori, S.; Borůvka, L.; Vašát, R.; Kočárek, M. Ecological Risk Source Distribution, Uncertainty Analysis, and Application of Geographically Weighted Regression Cokriging for Prediction of Potentially Toxic Elements in Agricultural Soils. *Process Safety and Environmental Protection* **2022**, *164*, 729–746, doi:10.1016/j.psep.2022.06.051.
2515. Antuñano, N.; Cambra, J.F.; Arias, P.L. Hydrometallurgical Processes for Waelz Oxide Valorisation – An Overview. *Process Safety and Environmental Protection* **2019**, *129*, 308–320, doi:10.1016/j.psep.2019.06.028.
2516. Bian, H.; Jiang, J.; Zhu, Z.; Dou, Z.; Tang, B. Design and Implementation of an Early-Stage Monitoring System for Iron Sulfides Oxidation. *Process Safety and Environmental Protection* **2022**, *165*, 181–190, doi:10.1016/j.psep.2022.07.016.
2517. de Araújo Neto, A.P.; Sales, F.A.; Ramos, W.B.; Brito, R.P. Thermo-Environmental Evaluation of a Modified Waelz Process for Hazardous Waste Treatment. *Process Safety and Environmental Protection* **2021**, *149*, 442–450, doi:10.1016/j.psep.2020.11.021.
2518. Ji, Z.; Huang, B.; Gan, M.; Fan, X.; Chen, X.; Zhang, Y.; Zhao, Y. Insight into a Novel Technique to Regulate the Emission Profile of Hazardous PM<sub>2.5</sub> during Iron Ore Sintering Process. *Process Safety and Environmental Protection* **2020**, *133*, 88–96, doi:10.1016/j.psep.2019.10.029.
2519. Li, G.; Wang, J.; Rao, M.; Luo, J.; Zhang, X.; You, J.; Peng, Z.; Jiang, T. Coprocessing of Stainless-Steel Pickling Sludge with Laterite Ore via Rotary Kiln-Electric Furnace Route: Enhanced Desulfurization and Metal Recovery. *Process Safety and Environmental Protection* **2020**, *142*, 92–98, doi:10.1016/j.psep.2020.06.014.
2520. Li, M.; Zheng, F.; Xiao, Y.; Guan, Y.; Wang, J.; Zhen, Q.; Yu, Y. Utilization of Residual Heat to Prepare High Performance Foamed Glass-Ceramic from Blast Furnace Slag and Its Reinforce Mechanism. *Process Safety and Environmental Protection* **2021**, *156*, 391–404, doi:10.1016/j.psep.2021.10.019.
2521. Li, Q.; Wang, D.; Zhao, M.; Yang, M.; Tang, J.; Zhou, K. Modeling the Corrosion Rate of Carbon Steel in Carbonated Mixtures of MDEA-Based Solutions Using Artificial Neural Network. *Process Safety and Environmental Protection* **2021**, *147*, 300–310, doi:10.1016/j.psep.2020.08.035.
2522. Li, W.; Xue, X. Emission Reduction Research and Formation of Hexavalent Chromium in Stainless Steel Smelting: Cooling Rate and Boron Oxide Addition Effects. *Process Safety and Environmental Protection* **2019**, *122*, 131–143, doi:10.1016/j.psep.2018.11.025.
2523. Lim, Y.C.; Lin, S.-K.; Ju, Y.-R.; Wu, C.-H.; Lin, Y.-L.; Chen, C.-W.; Dong, C.-D. Reutilization of Dredged Harbor Sediment and Steel Slag by Sintering as Lightweight Aggregate. *Process Safety and Environmental Protection* **2019**, *126*, 287–296, doi:10.1016/j.psep.2019.04.020.
2524. Ochedi, F.O.; Liu, Y.; Adewuyi, Y.G. State-of-the-Art Review on Capture of CO<sub>2</sub> Using Adsorbents Prepared from Waste Materials. *Process Safety and Environmental Protection* **2020**, *139*, 1–25, doi:10.1016/j.psep.2020.03.036.

2525. Song, Y.; Li, S. Gas Leak Detection in Galvanised Steel Pipe with Internal Flow Noise Using Convolutional Neural Network. *Process Safety and Environmental Protection* **2021**, *146*, 736–744, doi:10.1016/j.psep.2020.11.053.
2526. Su, P.; Zhang, J.; Li, Y. Investigation of Chemical Associations and Leaching Behavior of Heavy Metals in Sodium Sulfide Hydrate Stabilized Stainless Steel Pickling Sludge. *Process Safety and Environmental Protection* **2019**, *123*, 79–86, doi:10.1016/j.psep.2019.01.001.
2527. Villaseñor-Basulto, D.L.; Kadier, A.; Singh, R.; Navarro-Mendoza, R.; Bandala, E.; Peralta-Hernández, J.M. Post-Tanning Wastewater Treatment Using Electrocoagulation: Optimization, Kinetics, and Settlement Analysis. *Process Safety and Environmental Protection* **2022**, *165*, 872–886, doi:10.1016/j.psep.2022.08.008.
2528. Xu, Q.; Xu, K. Safety Assessment of Sand Casting Explosion Accidents through On-Site Testing and Numerical Simulation of the Temperature Variation in Sand Molds to Protect Employee Health. *Process Safety and Environmental Protection* **2022**, *159*, 452–463, doi:10.1016/j.psep.2022.01.019.
2529. Zhao, Q.; Li, J.; You, K.; Liu, C. Recovery of Calcium and Magnesium Bearing Phases from Iron- and Steelmaking Slag for CO<sub>2</sub> Sequestration. *Process Safety and Environmental Protection* **2020**, *135*, 81–90, doi:10.1016/j.psep.2019.12.012.
2530. Zhao, Q.; Liu, C.; Gao, T.; Gao, L.; Saxén, H.; Zevenhoven, R. Remediation of Stainless Steel Slag with MnO for CO<sub>2</sub> Mineralization. *Process Safety and Environmental Protection* **2019**, *127*, 1–8, doi:10.1016/j.psep.2019.04.025.
2531. Zhao, Q.; Liu, K.; Sun, L.; Liu, C.; Jiang, M.; Saxén, H.; Zevenhoven, R. Towards Carbon Sequestration Using Stainless Steel Slag via Phase Modification and Co-Extraction of Calcium and Magnesium. *Process Safety and Environmental Protection* **2020**, *133*, 73–81, doi:10.1016/j.psep.2019.11.004.
2532. Pisciotta, M.; Pilorgé, H.; Feldmann, J.; Jacobson, R.; Davids, J.; Swett, S.; Sasso, Z.; Wilcox, J. Current State of Industrial Heating and Opportunities for Decarbonization. *Progress in Energy and Combustion Science* **2022**, *91*, doi:10.1016/j.pecs.2021.100982.
2533. Banos, A.; Hallam, K.R.; McEwan, C.; Whittaker, D.; Hughes, P.; Scott, T.B. Proof of Concept Trials for In-Situ Testing of Filter Performance on Sellafield Self Shielded Boxes. *Progress in Nuclear Energy* **2019**, *116*, 10–20, doi:10.1016/j.pnucene.2019.03.044.
2534. Binnersley, C.; Ashley, S.F.; Chard, P.; Lansdell, A.; O'Brien, G.; Shaughnessy, P.; Joyce, M.J. Quantifying Water in Spent Fuel Assemblies with Neutrons: A Simulation-Based Approach. *Progress in Nuclear Energy* **2022**, *145*, doi:10.1016/j.pnucene.2021.104110.
2535. de Lamare, J.; Vinsot, A.; Pasteau, A. “Qualitative and Time Analysis of the Gaseous Constituents Transport Processes in a Micro-Tunnel on the Basis of in-Situ Measurements.” *Progress in Nuclear Energy* **2022**, *151*, doi:10.1016/j.pnucene.2022.104359.
2536. Goode, J.B.; Hambley, D.I.; Hanson, B.C. End Point Determination for Spent

- Nuclear Fuel Drying Operations. *Progress in Nuclear Energy* **2019**, *116*, 108–114, doi:10.1016/j.pnucene.2019.04.004.
2537. Sakasegawa, H.; Nomura, M.; Sawayama, K.; Nakayama, T.; Yaita, Y.; Yonekawa, H.; Kobayashi, N.; Arima, T.; Hiyama, T.; Murata, E. Liquid Decontamination Using Acidic Electrolyzed Water for Various Uranium-Contaminated Steel Surfaces in Dismantled Centrifuge. *Progress in Nuclear Energy* **2022**, *153*, doi:10.1016/j.pnucene.2022.104396.
2538. Khalifa, S.; Mastrococco, B.; Au, D.; Ovaitt, S.; Barnes, T.; Carpenter, A.; Baxter, J. Dynamic Material Flow Analysis of Silicon Photovoltaic Modules to Support a Circular Economy Transition. *Progress in Photovoltaics* **2022**, *30*, 784–805, doi:10.1002/pip.3554.
2539. Stegner, M.A.; Ratajczak, Z.; Carpenter, S.R.; Williams, J.W. Inferring Critical Transitions in Paleoecological Time Series with Irregular Sampling and Variable Time-Averaging. *Quaternary Science Reviews* **2019**, *207*, 49–63, doi:10.1016/j.quascirev.2019.01.009.
2540. Fares, M.; Debili, M.Y.; Messaoudi, M.; Begaa, S.; Negara, K.; Messai, A. Boron-10 Lined Proportional Counter Development for Thermal Neutron Detection. *Radiation Detection Technology and Methods* **2021**, *5*, 110–116, doi:10.1007/s41605-020-00226-5.
2541. Yang, X.; Yang, L.; He, W.; Pei, Y.; Heng, Y.; Ma, X.; Li, H.; Huang, K.; Wang, C.; Li, Y.; et al. Research on the Measurement of Connecting Bars' Axial Force of JUNO Central Detector. *Radiation Detection Technology and Methods* **2020**, *4*, 362–371, doi:10.1007/s41605-020-00192-y.
2542. Ginzburg, D.; Eliyahu, I.; Spooner, N.; Sterenberg, M.; Reshes, G.; Shapiro, A.; Biderman, S.; Herman, B.; Assor, Y.; Nemirovsky, D.; et al. SEARCH FOR EXPERIMENTAL EVIDENCE OF DOSE-RATE AND WALL SCATTERING EFFECTS IN THE THERMOLUMINESCENCE RESPONSE OF LiF:Mg,Ti (TLD-100). *Radiation Protection Dosimetry* **2022**, *198*, 222–228, doi:10.1093/rpd/ncac029.
2543. Vandana, S.; Bakshi, A.; Behrens, R.; Chattaraj, A.; Saxena, S.; Dhami, P.; Panja, S.; Jagasia, P.; Selvam, T.; Dash, A.; et al. MEASUREMENT OF OPERATIONAL QUANTITIES H-P(0.07) AND H-P(3) FOR INDIGENOUSLY DEVELOPED Ru-106/Rh-106 SOURCE USING AN EXTRAPOLATION CHAMBER. *Radiation Protection Dosimetry* **2019**, *185*, 376–386, doi:10.1093/rpd/ncz024.
2544. Okeniyi, J.O.; Akinlabi, E.T.; Ikotun, J.O.; Okeniyi, E.T. C<sub>6</sub>H<sub>18</sub>N<sub>4</sub> Behaviour on Reinforcing-Steel Corrosion in Concrete Immersed in 0.5 M H<sub>2</sub>SO<sub>4</sub>. *Rasayan Journal of Chemistry* **2019**, *12*, 966–974, doi:10.31788/RJC.2019.1225097.
2545. Xu, L.; Chen, Y.; Guo, Z.; Tang, Z.; Luo, Y.; Xie, S.; Li, N.; Xu, J. Flexible Li+/Agar/PHEAA Double-Network Conductive Hydrogels with Self-Adhesive and Self-Repairing Properties as Strain Sensors for Human Motion Monitoring. *Reactive and Functional Polymers* **2021**, *168*, doi:10.1016/j.reactfunctpolym.2021.105054.
2546. Marín-Genescà, M.; García-Amorós, J.; Mujal-Rosas, R.; Vidal, L.M.; Arroyo, J.B.;

- Fajula, X.C. Ground Tire Rubber Recycling in Applications as Insulators in Polymeric Compounds, According to Spanish UNE Standards. *Recycling* **2020**, *5*, 1–14, doi:10.3390/recycling5030016.
2547. Mousa, E.; Ahmed, H.; Söderström, D. Potential of Alternative Organic Binders in Briquetting and Enhancing Residue Recycling in the Steel Industry. *Recycling* **2022**, *7*, doi:10.3390/recycling7020021.
2548. Mousa, E.; Hu, X.; Ye, G. Effect of Graphite on the Recovery of Valuable Metals from Spent Li-Ion Batteries in Baths of Hot Metal and Steel. *Recycling* **2022**, *7*, doi:10.3390/recycling7010005.
2549. Ogunmakinde, O.E. A Review of Circular Economy Development Models in China, Germany and Japan. *Recycling* **2019**, *4*, doi:10.3390/recycling4030027.
2550. Soto, F.R.C.; Bueno, J.J.P.; López, M.L.M.; Ramos, M.E.P.; Araiza, J.L.R.; Jiménez, R.R.; Manzano-Ramírez, A. Sustainability Metrics for Housing and the Thermal Performance Evaluation of a Low-Cost Prototype Made with Poly (Ethylene Terephthalate) Bottles. *Recycling* **2019**, *4*, doi:10.3390/recycling4030030.
2551. Albergaria Campos, A.M.; Khozhanov, N.; Assis, P.S.; Tursunbaev, K.; Masatbayev, M. Economic and Environmental Analyses of Biomass Torrefaction for Injection as Pulverized Material in Blast Furnaces. *REM - International Engineering Journal*. **2021**, *74*, 471–482, doi:10.1590/0370-44672020740101.
2552. de Alencar, J.P.S.G.; Pereira, B.A.; de Castro, J.A.; de Resende, V.G.; Vasconcelos, W.L. Evaluation of the Impact of Cluster Formation in a Direct Reduction Shaft Furnace through Numerical Simulation. *REM - International Engineering Journal*. **2021**, *74*, 451–461, doi:10.1590/0370-44672021740037.
2553. Dos Santos Pereira, P.G.; Pacheco, M.P.; Lima, B.T. Numerical Analysis of Soft Soil Improved with Stone Column Technique. *REM - International Engineering Journal*. **2021**, *74*, 319–327, doi:10.1590/0370-44672020740062.
2554. Guimarães, S.A.; Klein, D.; Calenzani, A.F.G.; Alves, É.C. Optimum Design of Steel Columns Filled with Concrete via Genetic Algorithm: Environmental Impact and Cost Analysis. *REM - International Engineering Journal*. **2022**, *75*, 117–128, doi:10.1590/0370-44672021750034.
2555. Silveira, L.R.D.; Lamoglia, M.S.; Gonçalves, P.H.; Kuffner, B.H.B.; Silva, G. Obtainment of a New Metal Matrix Composite from the Recycling of UNS S31803 Duplex Stainless Steel by Powder Metallurgy. *REM - International Engineering Journal*. **2022**, *75*, 235–244, doi:10.1590/0370-44672021750077.
2556. Mickelsen, R.L.; Wood, J.; Calfee, M.W.; Serre, S.; Ryan, S.; Touati, A.; Delafield, F.R.; Aslett, L.D. Low-Concentration Hydrogen Peroxide Decontamination for Bacillus Spore Contamination in Buildings. *Remediation* **2019**, *30*, 47–56, doi:10.1002/rem.21629.
2557. Burger, M.; Skrodzki, P.; Finney, L.; Nees, J.; Jovanovic, I. Remote Detection of Uranium Using Self-Focusing Intense Femtosecond Laser Pulses. *Remote Sensing* **2020**, *12*, doi:10.3390/rs12081281.
2558. Calassou, G.; Foucher, P.; Leon, J. Industrial Plume Properties Retrieved by

- Optimal Estimation Using Combined Hyperspectral and Sentinel-2 Data. *Remote Sensing* **2021**, *13*, doi:10.3390/rs13101865.
2559. Huang, Q.; Wang, Y.; Luzi, G.; Crosetto, M.; Monserrat, O.; Jiang, J.; Zhao, H.; Ding, Y. Ground-Based Radar Interferometry for Monitoring the Dynamic Performance of a Multitrack Steel Truss High-Speed Railway Bridge. *Remote Sensing* **2020**, *12*, doi:10.3390/rs12162594.
2560. Jhan, J.; Rau, J.; Chou, C. Underwater 3D Rigid Object Tracking and 6-DOF Estimation: A Case Study of Giant Steel Pipe Scale Model Underwater Installation. *Remote Sensing* **2020**, *12*, doi:10.3390/rs12162600.
2561. Jia, D.; Zhang, W.; Wang, Y.; Liu, Y. A New Approach for Cylindrical Steel Structure Deformation Monitoring by Dense Point Clouds. *Remote Sensing* **2021**, *13*, doi:10.3390/rs13122263.
2562. Liang, H.; Li, N.; Han, J.; Bian, X.; Xia, H.; Dong, L. Investigating the Temporal and Spatial Dynamics of Human Development Index: A Comparative Study on Countries and Regions in the Eastern Hemisphere from the Perspective of Evolution. *Remote Sensing* **2021**, *13*, doi:10.3390/rs13122415.
2563. Ma, Y.; Ma, C.; Liu, P.; Yang, J.; Wang, Y.; Zhu, Y.; Du, X. Spatial-Temporal Distribution Analysis of Industrial Heat Sources in the US with Geocoded, Tree-Based, Large-Scale Clustering. *Remote Sensing* **2020**, *12*, doi:10.3390/rs12183069.
2564. Pereira, A.; Cabaleiro, M.; Conde, B.; Sanchez-Rodriguez, A. Automatic Identification and Geometrical Modeling of Steel Rivets of Historical Structures from Lidar Data. *Remote Sensing* **2021**, *13*, doi:10.3390/rs13112108.
2565. Sadeghi, F.; Zhu, X.; Li, J.; Rashidi, M. A Novel Slip Sensory System for Interfacial Condition Monitoring of Steel-Concrete Composite Bridges. *Remote Sensing* **2021**, *13*, doi:10.3390/rs13173377.
2566. Souriou, D.; Kadkhodazadeh, S.; Derobert, X.; Guilbert, D.; Ihamouten, A. Experimental Parametric Study of a Functional-Magnetic Material Designed for the Monitoring of Corrosion in Reinforced Concrete Structures. *Remote Sensing* **2022**, *14*, doi:10.3390/rs14153623.
2567. Vasile, G. Vibration Data Processing for Bedload Monitoring in Underwater Environments. *Remote Sensing* **2020**, *12*, doi:10.3390/rs12172797.
2568. Zeng, L.; Jiang, S.; Jing, L.; Xue, Y. Source Apportionment of Heavy Metal Contamination in Urban-Agricultural-Aquacultural Soils near the Bohai Bay Coast, Using Land-Use Classification and Google Satellite Tracing. *Remote Sensing* **2022**, *14*, doi:10.3390/rs14102436.
2569. Chong, H.; Lee, S.; Kim, J.; Jeong, U.; Li, C.; Krotkov, N.; Nowlan, C.; Al-Saadi, J.; Janz, S.; Kowalewski, M.; et al. High-Resolution Mapping of SO<sub>2</sub> Using Airborne Observations from the GeoTASO Instrument during the KORUS-AQ Field Study: PCA-Based Vertical Column Retrievals. *Remote Sensing of Environment* **2020**, *241*, doi:10.1016/j.rse.2020.111725.
2570. Arens, M.; Åhman, M.; Vogl, V. Which Countries Are Prepared to Green Their Coal-Based Steel Industry with Electricity? - Reviewing Climate and Energy

- Policy as Well as the Implementation of Renewable Electricity. *Renewable and Sustainable Energy Reviews* **2021**, *143*, doi:10.1016/j.rser.2021.110938.
2571. Cheng, Z.; Tan, Z.; Guo, Z.; Yang, J.; Wang, Q. Recent Progress in Sustainable and Energy-Efficient Technologies for Sinter Production in the Iron and Steel Industry. *Renewable and Sustainable Energy Reviews* **2020**, *131*, doi:10.1016/j.rser.2020.110034.
2572. Debiagi, P.; Rocha, R.C.; Scholtissek, A.; Janicka, J.; Hasse, C. Iron as a Sustainable Chemical Carrier of Renewable Energy: Analysis of Opportunities and Challenges for Retrofitting Coal-Fired Power Plants. *Renewable and Sustainable Energy Reviews* **2022**, *165*, doi:10.1016/j.rser.2022.112579.
2573. Ding, L.; Wang, Y.; Lin, H.; van Lierop, L.; Hu, B. Facilitating Solid-State Anaerobic Digestion of Food Waste via Bio-Electrochemical Treatment. *Renewable and Sustainable Energy Reviews* **2022**, *166*, doi:10.1016/j.rser.2022.112637.
2574. Harvey, L.D.D. Iron and Steel Recycling: Review, Conceptual Model, Irreducible Mining Requirements, and Energy Implications. *Renewable and Sustainable Energy Reviews* **2021**, *138*, doi:10.1016/j.rser.2020.110553.
2575. Jiang, J.; Ye, B.; Liu, J. Peak of CO<sub>2</sub> Emissions in Various Sectors and Provinces of China: Recent Progress and Avenues for Further Research. *Renewable and Sustainable Energy Reviews* **2019**, *112*, 813–833, doi:10.1016/j.rser.2019.06.024.
2576. Jiang, K.; Ashworth, P. The Development of Carbon Capture Utilization and Storage (CCUS) Research in China: A Bibliometric Perspective. *Renewable and Sustainable Energy Reviews* **2021**, *138*, doi:10.1016/j.rser.2020.110521.
2577. Johnsson, F.; Karlsson, I.; Rootzén, J.; Ahlbäck, A.; Gustavsson, M. The Framing of a Sustainable Development Goals Assessment in Decarbonizing the Construction Industry – Avoiding “Greenwashing.” *Renewable and Sustainable Energy Reviews* **2020**, *131*, doi:10.1016/j.rser.2020.110029.
2578. Karlsson, I.; Rootzén, J.; Johnsson, F. Reaching Net-Zero Carbon Emissions in Construction Supply Chains – Analysis of a Swedish Road Construction Project. *Renewable and Sustainable Energy Reviews* **2020**, *120*, doi:10.1016/j.rser.2019.109651.
2579. Lerede, D.; Bustreo, C.; Gracceva, F.; Saccone, M.; Savoldi, L. Techno-Economic and Environmental Characterization of Industrial Technologies for Transparent Bottom-up Energy Modeling. *Renewable and Sustainable Energy Reviews* **2021**, *140*, doi:10.1016/j.rser.2021.110742.
2580. Li, C.; Mogollón, J.M.; Tukker, A.; Dong, J.; von Terzi, D.; Zhang, C.; Steubing, B. Future Material Requirements for Global Sustainable Offshore Wind Energy Development. *Renewable and Sustainable Energy Reviews* **2022**, *164*, doi:10.1016/j.rser.2022.112603.
2581. Minunno, R.; O’Grady, T.; Morrison, G.; Gruner, R. Investigating the Embodied Energy and Carbon of Buildings: A Systematic Literature Review and Meta-Analysis of Life Cycle Assessments. *Renewable and Sustainable Energy Reviews* **2021**, *143*, doi:10.1016/j.rser.2021.110935.
2582. Olabi, A.; Obaideen, K.; Elsaid, K.; Wilberforce, T.; Sayed, E.; Maghrabie, H.; Abdelkareem, M. Assessment of the Pre-Combustion Carbon Capture



- Contribution into Sustainable Development Goals SDGs Using Novel Indicators. *Renewable and Sustainable Energy Reviews* **2022**, *153*, doi:10.1016/j.rser.2021.111710.
2583. Pan, W.; Teng, Y. A Systematic Investigation into the Methodological Variables of Embodied Carbon Assessment of Buildings. *Renewable and Sustainable Energy Reviews* **2021**, *141*, doi:10.1016/j.rser.2021.110840.
2584. Pili, R.; García Martínez, L.; Wieland, C.; Spliethoff, H. Techno-Economic Potential of Waste Heat Recovery from German Energy-Intensive Industry with Organic Rankine Cycle Technology. *Renewable and Sustainable Energy Reviews* **2020**, *134*, doi:10.1016/j.rser.2020.110324.
2585. Ren, L.; Zhou, S.; Peng, T.; Ou, X. A Review of CO<sub>2</sub> Emissions Reduction Technologies and Low-Carbon Development in the Iron and Steel Industry Focusing on China. *Renewable and Sustainable Energy Reviews* **2021**, *143*, doi:10.1016/j.rser.2021.110846.
2586. Rodrigues, T.; Braghini Junior, A. Technological Prospecting in the Production of Charcoal: A Patent Study. *Renewable and Sustainable Energy Reviews* **2019**, *111*, 170–183, doi:10.1016/j.rser.2019.04.080.
2587. Shao, T.; Pan, X.; Li, X.; Zhou, S.; Zhang, S.; Chen, W. China's Industrial Decarbonization in the Context of Carbon Neutrality: A Sub-Sectoral Analysis Based on Integrated Modelling. *Renewable and Sustainable Energy Reviews* **2022**, *170*, doi:10.1016/j.rser.2022.112992.
2588. Wang, F.; Xie, J.; Wu, S.; Li, J.; Barbieri, D.; Zhang, L. Life Cycle Energy Consumption by Roads and Associated Interpretative Analysis of Sustainable Policies. *Renewable and Sustainable Energy Reviews* **2021**, *141*, doi:10.1016/j.rser.2021.110823.
2589. Wang, P.; Zhao, S.; Dai, T.; Peng, K.; Zhang, Q.; Li, J.; Chen, W.-Q. Regional Disparities in Steel Production and Restrictions to Progress on Global Decarbonization: A Cross-National Analysis. *Renewable and Sustainable Energy Reviews* **2022**, *161*, doi:10.1016/j.rser.2022.112367.
2590. Wang, Y.; Wen, Z.; Cao, X.; Dinga, C.D. Is Information and Communications Technology Effective for Industrial Energy Conservation and Emission Reduction? Evidence from Three Energy-Intensive Industries in China. *Renewable and Sustainable Energy Reviews* **2022**, *160*, doi:10.1016/j.rser.2022.112344.
2591. Wang, Y.; Wen, Z.; Yao, J.; Doh Dinga, C. Multi-Objective Optimization of Synergic Energy Conservation and CO<sub>2</sub> Emission Reduction in China's Iron and Steel Industry under Uncertainty. *Renewable and Sustainable Energy Reviews* **2020**, *134*, doi:10.1016/j.rser.2020.110128.
2592. Yang, F.; Meerman, J.C.; Faaij, A.P.C. Carbon Capture and Biomass in Industry: A Techno-Economic Analysis and Comparison of Negative Emission Options. *Renewable and Sustainable Energy Reviews* **2021**, *144*, doi:10.1016/j.rser.2021.111028.
2593. Yu, S.; Liu, Y.; Wang, D.; Bahaj, A.S.; Wu, Y.; Liu, J. Review of Thermal and Environmental Performance of Prefabricated Buildings: Implications to Emission Reductions in China. *Renewable and Sustainable Energy Reviews* **2021**, *137*,

- doi:10.1016/j.rser.2020.110472.
2594. Abd-Elhady, M.S.; Abd-Elkerim, A.N.A.; Ahmed, S.A.; Halim, M.A.; Abu-Oqual, A. Study the Thermal Performance of Solar Cookers by Using Metallic Wires and Nanographene. *Renewable Energy* **2020**, *153*, 108–116, doi:10.1016/j.renene.2019.09.037.
2595. Boer, D.; Segarra, M.; Fernández, A.I.; Vallès, M.; Mateu, C.; Cabeza, L.F. Approach for the Analysis of TES Technologies Aiming towards a Circular Economy: Case Study of Building-like Cubicles. *Renewable Energy* **2020**, *150*, 589–597, doi:10.1016/j.renene.2019.12.103.
2596. Cardoso de Freitas Murari, M.; de Hollanda Cavalcanti Tsuha, C.; Loveridge, F. Investigation on the Thermal Response of Steel Pipe Energy Piles with Different Backfill Materials. *Renewable Energy* **2022**, *199*, 44–61, doi:10.1016/j.renene.2022.08.105.
2597. Chen, R.; Zhang, Z.; Wu, J.; Chen, X.; Wang, L.; Yin, H.; Li, H.; Ding, J.; Wan, H.; Guan, G. “Carbon Diffusion” Engineered Carbon Nitride Nanosheets for High-Efficiency Photocatalytic Solar-to-Fuels Conversion. *Renewable Energy* **2022**, *197*, 943–952, doi:10.1016/j.renene.2022.08.014.
2598. Domínguez, A.; Geyer, R. Photovoltaic Waste Assessment of Major Photovoltaic Installations in the United States of America. *Renewable Energy* **2019**, 1188–1200, doi:10.1016/j.renene.2018.08.063.
2599. Fernandes, D.M.; Squizzato, A.L.; Lima, A.F.; Richter, E.M.; Munoz, R.A.A. Corrosive Character of Moringa Oleifera Lam Biodiesel Exposed to Carbon Steel under Simulated Storage Conditions. *Renewable Energy* **2019**, *139*, 1263–1271, doi:10.1016/j.renene.2019.03.034.
2600. Fernández, A.G.; Pineda, F.; Walczak, M.; Cabeza, L.F. Corrosion Evaluation of Alumina-Forming Alloys in Carbonate Molten Salt for CSP Plants. *Renewable Energy* **2019**, *140*, 227–233, doi:10.1016/j.renene.2019.03.087.
2601. Haendel, M.; Hirzel, S.; Süß, M. Economic Optima for Buffers in Direct Reduction Steelmaking under Increasing Shares of Renewable Hydrogen. *Renewable Energy* **2022**, *190*, 1100–1111, doi:10.1016/j.renene.2021.10.036.
2602. Momber, A.W.; Nattkemper, T.W.; Langenkämper, D.; Möller, T.; Brün, D.; Schaumann, P.; Shojai, S. A Data-Based Model for Condition Monitoring and Maintenance Planning for Protective Coating Systems for Wind Tower Structures. *Renewable Energy* **2022**, *186*, 957–973, doi:10.1016/j.renene.2022.01.022.
2603. Norouzi, A.M.; Siavashi, M.; Khaliji Oskouei, M. Efficiency Enhancement of the Parabolic Trough Solar Collector Using the Rotating Absorber Tube and Nanoparticles. *Renewable Energy* **2020**, *145*, 569–584, doi:10.1016/j.renene.2019.06.027.
2604. Nwachukwu, C.M.; Toffolo, A.; Wetterlund, E. Biomass-Based Gas Use in Swedish Iron and Steel Industry – Supply Chain and Process Integration Considerations. *Renewable Energy* **2020**, *146*, 2797–2811, doi:10.1016/j.renene.2019.08.100.
2605. Rangel, C.M.; Fernandes, V.R.; Gano, A.J. Metal Hydride-Based Hydrogen

- Production and Storage System for Stationary Applications Powered by Renewable Sources. *Renewable Energy* **2022**, *197*, 398–405, doi:10.1016/j.renene.2022.07.103.
2606. Rosenfeld, D.C.; Böhm, H.; Lindorfer, J.; Lehner, M. Scenario Analysis of Implementing a Power-to-Gas and Biomass Gasification System in an Integrated Steel Plant: A Techno-Economic and Environmental Study. *Renewable Energy* **2020**, *147*, 1511–1524, doi:10.1016/j.renene.2019.09.053.
2607. Sacchi, R.; Besseau, R.; Pérez-López, P.; Blanc, I. Exploring Technologically, Temporally and Geographically-Sensitive Life Cycle Inventories for Wind Turbines: A Parameterized Model for Denmark. *Renewable Energy* **2019**, *132*, 1238–1250, doi:10.1016/j.renene.2018.09.020.
2608. Sengupta, A.R.; Biswas, A.; Gupta, R. Comparison of Low Wind Speed Aerodynamics of Unsymmetrical Blade H-Darrieus Rotors-Blade Camber and Curvature Signatures for Performance Improvement. *Renewable Energy* **2019**, *139*, 1412–1427, doi:10.1016/j.renene.2019.03.054.
2609. Somerville, M.; Deev, A. The Effect of Heating Rate, Particle Size and Gas Flow on the Yield of Charcoal during the Pyrolysis of Radiata Pine Wood. *Renewable Energy* **2020**, *151*, 419–425, doi:10.1016/j.renene.2019.11.036.
2610. Tziavos, N.I.; Hemida, H.; Dirar, S.; Papaelias, M.; Metje, N.; Baniotopoulos, C. Structural Health Monitoring of Grouted Connections for Offshore Wind Turbines by Means of Acoustic Emission: An Experimental Study. *Renewable Energy* **2020**, *147*, 130–140, doi:10.1016/j.renene.2019.08.114.
2611. Janaki, M.; Sobhanallahi, M.; Khamseh, A. Development and Prioritization of Green Supply Chain Strategies and Renewable Energies in Uncertainty Conditions. *Renewable Energy Research and Applications* **2022**, *3*, 115–129, doi:10.22044/rera.2021.11388.1090.
2612. Li, X.; Lu, L.; Mu, X.; Qin, C. Emission Reduction Potential of Pollutants Emissions from Iron and Steel Industry over Beijing-Tianjin-Hebei Region Based on LEAP. *Research of Environmental Sciences* **2019**, *32*, 365–371, doi:10.13198/j.issn.1001-6929.2018.12.02.
2613. Li, X.; Lu, L.; Mu, X.; Qin, C. Cost-Benefit Analysis of Synergistic Emission Reduction in Steel Industry in Beijing-Tianjin-Hebei Region, China. *Research of Environmental Sciences* **2020**, *33*, 2226–2234, doi:10.13198/j.issn.1001-6929.2020.04.05.
2614. Li, Z.; Xu, Y.; Yi, W.; Huang, Y.; Liu, X.; Li, X. Evaluation, Selection and Application of Low-Carbon Technology in Iron and Steel Enterprises. *Research of Environmental Sciences* **2022**, *35*, 1538–1546, doi:10.13198/j.issn.1001-6929.2022.04.17.
2615. Liu, F.; Xue, Z.; Xu, P.; Du, J.; Ma, J.; Zhang, H.; Chen, W. Comparative Study on Pollutant Emission Characteristics of Typical Sintering Machines in Iron and Steel Industry. *Research of Environmental Sciences* **2020**, *33*, 849–858, doi:10.13198/j.issn.1001-6929.2020.02.08.

2616. Wang, H.; Wu, Q.; Bai, L.; Zheng, G.; Wang, X.; Zhao, X. Analysis of the Typical Air Pollutants Emission Reduction Potential of Non-Key Industries Furnaces in the “14th Five-Year Plan.” *Research of Environmental Sciences* **2020**, *33*, 2647–2656, doi:10.13198/j.issn.1001-6929.2020.10.30.
2617. Wang, J.; Zhang, S.; Yong, J.; Zhang, Z.; Chen, Y. Characteristics and Causes of Heavy Pollution in Typical Industrial City in Ningxia in January 2020. *Research of Environmental Sciences* **2021**, *34*, 1802–1811, doi:10.13198/j.issn.1001-6929.2021.05.26.
2618. Wang, S.; Lü, L.; Zhang, B.; Wang, S.; Wu, J.; Fu, J.; Luo, H. Multi Objective Programming Model of Low-Cost Path for China’s Peaking Carbon Dioxide Emissions and Carbon Neutrality. *Research of Environmental Sciences* **2021**, *34*, 2044–2055, doi:10.13198/j.issn.1001-6929.2021.06.18.
2619. Wang, X.; Li, B.; Lü, C.; Guan, Z.; Cai, B.; Lei, Y.; Yan, G. China’s Iron and Steel Industry Carbon Emissions Peak Pathways. *Research of Environmental Sciences* **2022**, *35*, 339–346, doi:10.13198/j.issn.1001-6929.2021.11.11.
2620. Wen, J.; Li, B.; Zhang, X.; Tian, Y.; Huang, B.; Zhu, H.; Feng, Y. PM<sub>2.5</sub> Profiles of Typical Industrial Emissions in Yantai City, China. *Research of Environmental Sciences* **2019**, *32*, 1333–1339, doi:10.13198/j.issn.1001-6929.2019.04.06.
2621. Yan, G.; Zheng, Y.; Wang, X.; Li, B.; He, J.; Shao, Z.; Li, Y.; Wu, L.; Ding, Y.; Xu, W.; et al. Pathway for Carbon Dioxide Peaking in China Based on Sectoral Analysis. *Research of Environmental Sciences* **2022**, *35*, 309–319, doi:10.13198/j.issn.1001-6929.2021.11.13.
2622. Yang, T.; Yu, H.; He, Y.; Miao, Y.; Gao, Y.; Li, N.; Wang, W. Characterization of Elemental Compositions and Their Sources of PM<sub>2.5</sub> in Tangshan City in Autumn and Winter from 2017 to 2018. *Research of Environmental Sciences* **2020**, *33*, 2030–2039, doi:10.13198/j.issn.1001-6929.2020.05.07.
2623. Zhang, J.; Xue, Y.; Zhao, J.; He, J.; Li, B.; Zhang, H.; Yuan, S.; Li, B.; Huang, Z.; Weng, H.; et al. Evaluation of Cost and Economic Impact of China’s Carbon Peak Pathway on Key Industries. *Research of Environmental Sciences* **2022**, *35*, 414–423, doi:10.13198/j.issn.1001-6929.2021.11.07.
2624. Glushankova, I.; Ketov, A.; Krasnovskikh, M.; Rudakova, L.; Vaisman, I. End of Life Tires as a Possible Source of Toxic Substances Emission in the Process of Combustion. *Resources* **2019**, *8*, doi:10.3390/RESOURCES8020113.
2625. Graedel, T.E.; Reck, B.K.; Ciacci, L.; Passarini, F. On the Spatial Dimension of the Circular Economy. *Resources* **2019**, *8*, doi:10.3390/resources8010032.
2626. Gu, W.; Wang, C.; Dai, S.; Wei, L.; Chiang, I.R. Optimal Strategies for Reverse Logistics Network Construction: A Multi-Criteria Decision Method for Chinese Iron and Steel Industry. *Resources Policy* **2021**, *74*, doi:10.1016/j.resourpol.2019.02.008.
2627. Guo, S.; Li, H.; An, H.; Sun, Q.; Hao, X.; Liu, Y. Steel Product Prices Transmission Activities in the Midstream Industrial Chain and Global Markets. *Resources Policy* **2019**, *60*, 56–71, doi:10.1016/j.resourpol.2018.11.014.

2628. Kolagar, M.; Saboohi, Y.; Fathi, A. Evaluation of Long-Term Steel Demand in Developing Countries- Case Study: Iran. *Resources Policy* **2022**, *77*, doi:10.1016/j.resourpol.2022.102675.
2629. Li, Q.; Gao, T.; Wang, G.; Cheng, J.; Dai, T.; Wang, H. Dynamic Analysis of Iron Flows and In-Use Stocks in China: 1949–2015. *Resources Policy* **2019**, *62*, 625–634, doi:10.1016/j.resourpol.2018.11.011.
2630. Liu, Y.; Li, H.; Guan, J.; Feng, S.; Guo, S. The Impact of Chinese Steel Product Prices Based on the Midstream Industry Chain. *Resources Policy* **2019**, *63*, doi:10.1016/j.resourpol.2019.101415.
2631. Ma, Y. Do Iron Ore, Scrap Steel, Carbon Emission Allowance, and Seaborne Transportation Prices Drive Steel Price Fluctuations? *Resources Policy* **2021**, *72*, doi:10.1016/j.resourpol.2021.102115.
2632. Ma, Y.; Wang, J. Time-Varying Spillovers and Dependencies between Iron Ore, Scrap Steel, Carbon Emission, Seaborne Transportation, and China's Steel Stock Prices. *Resources Policy* **2021**, *74*, doi:10.1016/j.resourpol.2021.102254.
2633. Mhatre, P.; Gedam, V.V.; Unnikrishnan, S. Material Circularity Potential for Construction Materials – The Case of Transportation Infrastructure in India. *Resources Policy* **2021**, *74*, doi:10.1016/j.resourpol.2021.102446.
2634. Ozdemir, A.C.; Buluş, K.; Zor, K. Medium- to Long-Term Nickel Price Forecasting Using LSTM and GRU Networks. *Resources Policy* **2022**, *78*, doi:10.1016/j.resourpol.2022.102906.
2635. Sun, X.; Hao, H.; Liu, Z.; Zhao, F. Insights into the Global Flow Pattern of Manganese. *Resources Policy* **2020**, *65*, doi:10.1016/j.resourpol.2019.101578.
2636. Taghipour, A.; Akkalatham, W.; Eaknarajindawat, N.; Stefanakis, A.I. The Impact of Government Policies and Steel Recycling Companies' Performance on Sustainable Management in a Circular Economy. *Resources Policy* **2022**, *77*, doi:10.1016/j.resourpol.2022.102663.
2637. Watari, T.; Yokoi, R. International Inequality in In-Use Metal Stocks: What It Portends for the Future. *Resources Policy* **2021**, *70*, doi:10.1016/j.resourpol.2020.101968.
2638. Xu, J.; Lu, C.; Ruan, S.; Xiong, N.N. Estimating the Efficiency and Potential of China's Steel Products Export to Countries along the "Belt and Road" under Interconnection: An Application of Extended Stochastic Frontier Gravity Model. *Resources Policy* **2022**, *75*, doi:10.1016/j.resourpol.2021.102513.
2639. Abdelshafy, A.; Walther, G. Exploring the Effects of Energy Transition on the Industrial Value Chains and Alternative Resources: A Case Study from the German Federal State of North Rhine-Westphalia (NRW). *Resources, Conservation and Recycling* **2022**, *177*, doi:10.1016/j.resconrec.2021.105992.
2640. Ajayebi, A.; Hopkinson, P.; Zhou, K.; Lam, D.; Chen, H.-M.; Wang, Y. Estimation of Structural Steel and Concrete Stocks and Flows at Urban Scale—towards a Prospective Circular Economy. *Resources, Conservation and Recycling* **2021**, *174*, doi:10.1016/j.resconrec.2021.105821.

2641. Ali, B.; Raza, S.S.; Kurda, R.; Alyousef, R. Synergistic Effects of Fly Ash and Hooked Steel Fibers on Strength and Durability Properties of High Strength Recycled Aggregate Concrete. *Resources, Conservation and Recycling* **2021**, *168*, doi:10.1016/j.resconrec.2021.105444.
2642. Andersen, R.; Ravn, A.S.; Ryberg, M.W. Environmental Benefits of Applying Selective Demolition to Buildings: A Case Study of the Reuse of Façade Steel Cladding. *Resources, Conservation and Recycling* **2022**, *184*, doi:10.1016/j.resconrec.2022.106430.
2643. Arain, A.L.; Neitzel, R.L.; Nambunmee, K.; Hischier, R.; Jindaphong, S.; Austin-Breneman, J.; Jolliet, O. Material Flow, Economic and Environmental Life Cycle Performances of Informal Electronic Waste Recycling in a Thai Community. *Resources, Conservation and Recycling* **2022**, *180*, doi:10.1016/j.resconrec.2021.106129.
2644. Arehart, J.; Pomponi, F.; D'Amico, B.; Iii, W. Structural Material Demand and Associated Embodied Carbon Emissions of the United States Building Stock: 2020–2100. *Resources, Conservation and Recycling* **2022**, *186*, doi:10.1016/j.resconrec.2022.106583.
2645. Arens, M. Policy Support for and R&D Activities on Digitising the European Steel Industry. *Resources, Conservation and Recycling* **2019**, *143*, 244–250, doi:10.1016/j.resconrec.2018.12.020.
2646. Arowosola, A.; Gaustad, G. Estimating Increasing Diversity and Dissipative Loss of Critical Metals in the Aluminum Automotive Sector. *Resources, Conservation and Recycling* **2019**, *150*, doi:10.1016/j.resconrec.2019.06.016.
2647. Aryapratama, R.; Pauliuk, S. Estimating In-Use Wood-Based Materials Carbon Stocks in Indonesia: Towards a Contribution to the National Climate Mitigation Effort. *Resources, Conservation and Recycling* **2019**, *149*, 301–311, doi:10.1016/j.resconrec.2019.06.010.
2648. Bauer, F.; Hansen, T.; Nilsson, L. Assessing the Feasibility of Archetypal Transition Pathways towards Carbon Neutrality - A Comparative Analysis of European Industries. *Resources, Conservation and Recycling* **2022**, *177*, doi:10.1016/j.resconrec.2021.106015.
2649. Berlin, D.; Feldmann, A.; Nuur, C. Supply Network Collaborations in a Circular Economy: A Case Study of Swedish Steel Recycling. *Resources, Conservation and Recycling* **2022**, *179*, doi:10.1016/j.resconrec.2021.106112.
2650. Biswal, S.; Pahlevani, F.; Bhattacharyya, S.K.; Sahajwalla, V. A Novel Reforming Approach of Utilizing Spent Coffee Grounds to Produce Iron. *Resources, Conservation and Recycling* **2020**, *163*, doi:10.1016/j.resconrec.2020.105067.
2651. Brambilla, G.; Lavagna, M.; Vasdravellis, G.; Castiglioni, C.A. Environmental Benefits Arising from Demountable Steel-Concrete Composite Floor Systems in Buildings. *Resources, Conservation and Recycling* **2019**, *141*, 133–142, doi:10.1016/j.resconrec.2018.10.014.
2652. Capaz, R.S.; Posada, J.A.; Osseweijer, P.; Seabra, J.E.A. The Carbon Footprint of

- Alternative Jet Fuels Produced in Brazil: Exploring Different Approaches. *Resources, Conservation and Recycling* **2021**, *166*, doi:10.1016/j.resconrec.2020.105260.
2653. Chen, J.; Mao, B.; Wu, Y.; Zhang, D.; Wei, Y.; Yu, A.; Peng, L. Green Development Strategy of Offshore Wind Farm in China Guided by Life Cycle Assessment. *Resources, Conservation and Recycling* **2023**, *188*, doi:10.1016/j.resconrec.2022.106652.
2654. de Souza, J.F.T.; Pacca, S.A. Carbon Reduction Potential and Costs through Circular Bioeconomy in the Brazilian Steel Industry. *Resources, Conservation and Recycling* **2021**, *169*, doi:10.1016/j.resconrec.2021.105517.
2655. Deetman, S.; de Boer, H.S.; Van Engelenburg, M.; van der Voet, E.; van Vuuren, D.P. Projected Material Requirements for the Global Electricity Infrastructure – Generation, Transmission and Storage. *Resources, Conservation and Recycling* **2021**, *164*, doi:10.1016/j.resconrec.2020.105200.
2656. Deng, S.; Ren, P.; Jiang, Y.; Shao, X.; Ling, T. Use of CO<sub>2</sub>-Active BOFS Binder in the Production of Artificial Aggregates with Waste Concrete Powder. *Resources, Conservation and Recycling* **2022**, *182*, doi:10.1016/j.resconrec.2022.106332.
2657. Dente, S.M.R.; Aoki-Suzuki, C.; Tanaka, D.; Kayo, C.; Murakami, S.; Hashimoto, S. Effects of a New Supply Chain Decomposition Framework on the Material Life Cycle Greenhouse Gas Emissions—the Japanese Case. *Resources, Conservation and Recycling* **2019**, *143*, 273–281, doi:10.1016/j.resconrec.2018.09.027.
2658. Díaz-Romero, D.J.; Van den Eynde, S.; Sterkens, W.; Engelen, B.; Zaplana, I.; Dewulf, W.; Goedemé, T.; Peeters, J. Simultaneous Mass Estimation and Class Classification of Scrap Metals Using Deep Learning. *Resources, Conservation and Recycling* **2022**, *181*, doi:10.1016/j.resconrec.2022.106272.
2659. Duchin, F.; Levine, S. The Recovery of Products and Materials for Reuse: The Global Context of Resource Management. *Resources, Conservation and Recycling* **2019**, *145*, 422–447, doi:10.1016/j.resconrec.2018.10.028.
2660. Dunant, C.F.; Skelton, A.C.H.; Drewniok, M.P.; Cullen, J.M.; Allwood, J.M. A Marginal Abatement Cost Curve for Material Efficiency Accounting for Uncertainty. *Resources, Conservation and Recycling* **2019**, *144*, 39–47, doi:10.1016/j.resconrec.2019.01.020.
2661. Dworak, S.; Rechberger, H. Mercury Throughput of the Austrian Manufacturing Industry - Discussion of Data and Data Gaps. *Resources, Conservation and Recycling* **2021**, *166*, doi:10.1016/j.resconrec.2020.105344.
2662. Dworak, S.; Fellner, J. Steel Scrap Generation in the EU-28 since 1946 – Sources and Composition. *Resources, Conservation and Recycling* **2021**, *173*, doi:10.1016/j.resconrec.2021.105692.
2663. Dworak, S.; Rechberger, H.; Fellner, J. How Will Tramp Elements Affect Future Steel Recycling in Europe? – A Dynamic Material Flow Model for Steel in the EU-28 for the Period 1910 to 2050. *Resources, Conservation and Recycling* **2022**, *179*, doi:10.1016/j.resconrec.2021.106072.

2664. Fisher, L.V.; Barron, A.R. The Recycling and Reuse of Steelmaking Slags — A Review. *Resources, Conservation and Recycling* **2019**, *146*, 244–255, doi:10.1016/j.resconrec.2019.03.010.
2665. Gao, C.; Gao, W.; Song, K.; Na, H.; Tian, F.; Zhang, S. Spatial and Temporal Dynamics of Air-Pollutant Emission Inventory of Steel Industry in China: A Bottom-up Approach. *Resources, Conservation and Recycling* **2019**, *143*, 184–200, doi:10.1016/j.resconrec.2018.12.032.
2666. Ghorbani, S.; Sharifi, S.; Ghorbani, S.; Tam, V.; de Brito, J.; Kurda, R. Effect of Crushed Concrete Waste's Maximum Size as Partial Replacement of Natural Coarse Aggregate on the Mechanical and Durability Properties of Concrete. *Resources, Conservation and Recycling* **2019**, *149*, 664–673, doi:10.1016/j.resconrec.2019.06.030.
2667. Graedel, T.E.; Miatto, A. U.S. Cobalt: A Cycle of Diverse and Important Uses. *Resources, Conservation and Recycling* **2022**, *184*, doi:10.1016/j.resconrec.2022.106441.
2668. Hartwell, R.; Macmillan, S.; Overend, M. Circular Economy of Facades: Real-World Challenges and Opportunities. *Resources, Conservation and Recycling* **2021**, *175*, doi:10.1016/j.resconrec.2021.105827.
2669. Hatayama, H. The Metals Industry and the Sustainable Development Goals: The Relationship Explored Based on SDG Reporting. *Resources, Conservation and Recycling* **2022**, *178*, doi:10.1016/j.resconrec.2021.106081.
2670. He, K.; Hertwich, E.G. The Flow of Embodied Carbon through the Economies of China, the European Union, and the United States. *Resources, Conservation and Recycling* **2019**, *145*, 190–198, doi:10.1016/j.resconrec.2019.02.016.
2671. He, X.; Kim, H.C.; Wallington, T.J.; Zhang, S.; Shen, W.; De Kleine, R.; Keoleian, G.A.; Ma, R.; Zheng, Y.; Zhou, B.; et al. Cradle-to-Gate Greenhouse Gas (GHG) Burdens for Aluminum and Steel Production and Cradle-to-Grave GHG Benefits of Vehicle Lightweighting in China. *Resources, Conservation and Recycling* **2020**, *152*, doi:10.1016/j.resconrec.2019.104497.
2672. Helbig, C.; Thorenz, A.; Tuma, A. Quantitative Assessment of Dissipative Losses of 18 Metals. *Resources, Conservation and Recycling* **2020**, *153*, doi:10.1016/j.resconrec.2019.104537.
2673. Horckmans, L.; Nielsen, P.; Dierckx, P.; Ducastel, A. Recycling of Refractory Bricks Used in Basic Steelmaking: A Review. *Resources, Conservation and Recycling* **2019**, *140*, 297–304, doi:10.1016/j.resconrec.2018.09.025.
2674. Islam, M.M.U.; Li, J.; Wu, Y.-F.; Roychand, R.; Saberian, M. Design and Strength Optimization Method for the Production of Structural Lightweight Concrete: An Experimental Investigation for the Complete Replacement of Conventional Coarse Aggregates by Waste Rubber Particles. *Resources, Conservation and Recycling* **2022**, *184*, doi:10.1016/j.resconrec.2022.106390.
2675. Kalt, G.; Thunshirn, P.; Wiedenhofer, D.; Krausmann, F.; Haas, W.; Haberl, H. Material Stocks in Global Electricity Infrastructures – An Empirical Analysis of the



- Power Sector's Stock-Flow-Service Nexus. *Resources, Conservation and Recycling* **2021**, *173*, doi:10.1016/j.resconrec.2021.105723.
2676. Kazmi, S.; Munir, M.; Wu, Y. Application of Waste Tire Rubber and Recycled Aggregates in Concrete Products: A New Compression Casting Approach. *Resources, Conservation and Recycling* **2021**, *167*, doi:10.1016/j.resconrec.2020.105353.
2677. Kim, J.; Azimi, G. Valorization of Electric Arc Furnace Slag via Carbothermic Reduction Followed by Acid Baking – Water Leaching. *Resources, Conservation and Recycling* **2021**, *173*, doi:10.1016/j.resconrec.2021.105710.
2678. Lanzerstorfer, C. Potential of Industrial De-Dusting Residues as a Source of Potassium for Fertilizer Production – A Mini Review. *Resources, Conservation and Recycling* **2019**, *143*, 68–76, doi:10.1016/j.resconrec.2018.12.013.
2679. Leon, M.; Blengini, G.; Dewulf, J. Cobalt in End-of-Life Products in the EU, Where Does It End up? - The MaTrace Approach. *Resources, Conservation and Recycling* **2020**, *158*, doi:10.1016/j.resconrec.2020.104842.
2680. Li, F.; Ye, Z.; Xiao, X.; Xu, J.; Liu, G. Material Stocks and Flows of Power Infrastructure Development in China. *Resources, Conservation and Recycling* **2020**, *160*, doi:10.1016/j.resconrec.2020.104906.
2681. Li, Z.; Hanaoka, T. Development of Large-Point Source Emission Downscale Model by Estimating the Future Capacity Distribution of the Chinese Iron and Steel Industry up to 2050. *Resources, Conservation and Recycling* **2020**, *161*, doi:10.1016/j.resconrec.2020.104853.
2682. Liu, G.; Schollbach, K.; van der Laan, S.; Tang, P.; Florea, M.V.A.; Brouwers, H.J.H. Recycling and Utilization of High Volume Converter Steel Slag into CO<sub>2</sub> Activated Mortars – The Role of Slag Particle Size. *Resources, Conservation and Recycling* **2020**, *160*, doi:10.1016/j.resconrec.2020.104883.
2683. Liu, L.; Keoleian, G.A. LCA of Rare Earth and Critical Metal Recovery and Replacement Decisions for Commercial Lighting Waste Management. *Resources, Conservation and Recycling* **2020**, *159*, doi:10.1016/j.resconrec.2020.104846.
2684. Madaka, H.; Babbitt, C.W.; Ryen, E.G. Opportunities for Reducing the Supply Chain Water Footprint of Metals Used in Consumer Electronics. *Resources, Conservation and Recycling* **2022**, *176*, doi:10.1016/j.resconrec.2021.105926.
2685. Mahmoudi, S.; Huda, N.; Behnia, M. Photovoltaic Waste Assessment: Forecasting and Screening of Emerging Waste in Australia. *Resources, Conservation and Recycling* **2019**, *146*, 192–205, doi:10.1016/j.resconrec.2019.03.039.
2686. Millette, S.; Williams, E.; Hull, C. Materials Flow Analysis in Support of Circular Economy Development: Plastics in Trinidad and Tobago. *Resources, Conservation and Recycling* **2019**, *150*, doi:10.1016/j.resconrec.2019.104436.
2687. Minunno, R.; O'Grady, T.; Morrison, G.; Gruner, R. Exploring Environmental Benefits of Reuse and Recycle Practices: A Circular Economy Case Study of a Modular Building. *Resources, Conservation and Recycling* **2020**, *160*, doi:10.1016/j.resconrec.2020.104855.

2688. Mochizuki, Y.; Tsubouchi, N.; Sugawara, K. Separation of Valuable Elements from Steel Making Slag by Chlorination. *Resources, Conservation and Recycling* **2020**, *158*, doi:10.1016/j.resconrec.2020.104815.
2689. Moraga, G.; Huysveld, S.; De Meester, S.; Dewulf, J. Resource Efficiency Indicators to Assess Circular Economy Strategies: A Case Study on Four Materials in Laptops. *Resources, Conservation and Recycling* **2022**, *178*, doi:10.1016/j.resconrec.2021.106099.
2690. Munir, M.J.; Wu, Y.-F.; Kazmi, S.M.S.; Patnaikuni, I.; Zhou, Y.; Xing, F. Stress-Strain Behavior of Spirally Confined Recycled Aggregate Concrete: An Approach towards Sustainable Design. *Resources, Conservation and Recycling* **2019**, *146*, 127–139, doi:10.1016/j.resconrec.2019.03.043.
2691. Muñoz-Liesa, J.; Toboso-Chavero, S.; Mendoza Beltran, A.; Cuerva, E.; Gallo, E.; Gassó-Domingo, S.; Josa, A. Building-Integrated Agriculture: Are We Shifting Environmental Impacts? An Environmental Assessment and Structural Improvement of Urban Greenhouses. *Resources, Conservation and Recycling* **2021**, *169*, doi:10.1016/j.resconrec.2021.105526.
2692. Nath, S.K.; Randhawa, N.S.; Kumar, S. A Review on Characteristics of Silico-Manganese Slag and Its Utilization into Construction Materials. *Resources, Conservation and Recycling* **2022**, *176*, doi:10.1016/j.resconrec.2021.105946.
2693. Nguyen, W.; Martinez, D.M.; Jen, G.; Duncan, J.F.; Ostertag, C.P. Interaction between Global Warming Potential, Durability, and Structural Properties of Fiber-Reinforced Concrete with High Waste Materials Inclusion. *Resources, Conservation and Recycling* **2021**, *169*, doi:10.1016/j.resconrec.2021.105453.
2694. Niu, Y.; Rasi, K.; Hughes, M.; Halme, M.; Fink, G. Prolonging Life Cycles of Construction Materials and Combating Climate Change by Cascading: The Case of Reusing Timber in Finland. *Resources, Conservation and Recycling* **2021**, *170*, doi:10.1016/j.resconrec.2021.105555.
2695. Nuss, P.; Ohno, H.; Chen, W.; Graedel, T. Comparative Analysis of Metals Use in the United States Economy. *Resources, Conservation and Recycling* **2019**, *145*, 448–456, doi:10.1016/j.resconrec.2019.02.025.
2696. O'Grady, T.; Minunno, R.; Chong, H.-Y.; Morrison, G.M. Design for Disassembly, Deconstruction and Resilience: A Circular Economy Index for the Built Environment. *Resources, Conservation and Recycling* **2021**, *175*, doi:10.1016/j.resconrec.2021.105847.
2697. Ohno, H.; Shigetomi, Y.; Chapman, A.; Fukushima, Y. Detailing the Economy-Wide Carbon Emission Reduction Potential of Post-Consumer Recycling. *Resources, Conservation and Recycling* **2021**, *166*, doi:10.1016/j.resconrec.2020.105263.
2698. Oliveira, F.D.; Gupta, N.; Kluge, M.; Finizio, C.M.; Spreadbury, C.J.; Chadik, P.; Laux, S.J.; Townsend, T.G. PH Attenuation by Soils Underlying Recycled Concrete Aggregate Road Base. *Resources, Conservation and Recycling* **2020**, *161*, doi:10.1016/j.resconrec.2020.104987.

2699. Ortego, A.; Calvo, G.; Valero, A.; Iglesias-Émbil, M.; Valero, A.; Villacampa, M. Assessment of Strategic Raw Materials in the Automobile Sector. *Resources, Conservation and Recycling* **2020**, *161*, doi:10.1016/j.resconrec.2020.104968.
2700. Ottink, T.; Vieceli, N.; Foreman, M.R.S.; Petranikova, M. Novel Approach to Recycling of Steel Swarf Using Hydrometallurgy. *Resources, Conservation and Recycling* **2022**, *185*, doi:10.1016/j.resconrec.2022.106450.
2701. Parchomenko, A.; Nelen, D.; Gillabel, J.; Vrancken, K.; Rechberger, H. Evaluation of the Resource Effectiveness of Circular Economy Strategies through Multilevel Statistical Entropy Analysis. *Resources, Conservation and Recycling* **2020**, *161*, doi:10.1016/j.resconrec.2020.104925.
2702. Pindar, S.; Dhawan, N. Characterization and Recycling Potential of the Discarded Cathode Ray Tube Monitors. *Resources, Conservation and Recycling* **2021**, *169*, doi:10.1016/j.resconrec.2021.105469.
2703. Pinto, J.T.M.; Diemer, A. Supply Chain Integration Strategies and Circularity in the European Steel Industry. *Resources, Conservation and Recycling* **2020**, *153*, doi:10.1016/j.resconrec.2019.104517.
2704. Plank, B.; Streeck, J.; Virág, D.; Krausmann, F.; Haberl, H.; Wiedenhofer, D. From Resource Extraction to Manufacturing and Construction: Flows of Stock-Building Materials in 177 Countries from 1900 to 2016. *Resources, Conservation and Recycling* **2022**, *179*, doi:10.1016/j.resconrec.2021.106122.
2705. Reis, D.; Abrao, P.; Sui, T.; John, V. Influence of Cement Strength Class on Environmental Impact of Concrete. *Resources, Conservation and Recycling* **2020**, *163*, doi:10.1016/j.resconrec.2020.105075.
2706. Rostek, L.; Tercero Espinoza, L.A.; Goldmann, D.; Loibl, A. A Dynamic Material Flow Analysis of the Global Anthropogenic Zinc Cycle: Providing a Quantitative Basis for Circularity Discussions. *Resources, Conservation and Recycling* **2022**, *180*, doi:10.1016/j.resconrec.2022.106154.
2707. Roychand, R.; Kumar Pramanik, B.; Zhang, G.; Setunge, S. Recycling Steel Slag from Municipal Wastewater Treatment Plants into Concrete Applications – A Step towards Circular Economy. *Resources, Conservation and Recycling* **2020**, *152*, doi:10.1016/j.resconrec.2019.104533.
2708. Sato, F.E.K.; Nakata, T. Analysis of the Impact of Vehicle Lightweighting on Recycling Benefits Considering Life Cycle Energy Reductions. *Resources, Conservation and Recycling* **2021**, *164*, doi:10.1016/j.resconrec.2020.105118.
2709. Schaubroeck, T.; Gibon, T.; Igos, E.; Benetto, E. Sustainability Assessment of Circular Economy over Time: Modelling of Finite and Variable Loops & Impact Distribution among Related Products. *Resources, Conservation and Recycling* **2021**, *168*, doi:10.1016/j.resconrec.2020.105319.
2710. Serrenho, A.; Drewniok, M.; Dunant, C.; Allwood, J. Testing the Greenhouse Gas Emissions Reduction Potential of Alternative Strategies for the English Housing Stock. *Resources, Conservation and Recycling* **2019**, *144*, 267–275, doi:10.1016/j.resconrec.2019.02.001.

2711. Skelton, M.; Huysveld, S.; De Meester, S.; Van Geem, K.; Dewulf, J. Statistical Entropy of Resources Using a Categorization Tree for Material Enumeration: Framework Development and Application to a Plastic Packaging Case Study. *Resources, Conservation and Recycling* **2022**, *181*, doi:10.1016/j.resconrec.2022.106259.
2712. Song, Q.; Guo, M.-Z.; Wang, L.; Ling, T.-C. Use of Steel Slag as Sustainable Construction Materials: A Review of Accelerated Carbonation Treatment. *Resources, Conservation and Recycling* **2021**, *173*, doi:10.1016/j.resconrec.2021.105740.
2713. Song, W.; Wang, C.; Chen, W.; Zhang, X.; Li, H.; Li, J. Unlocking the Spatial Heterogeneous Relationship between Per Capita GDP and Nearby Air Quality Using Bivariate Local Indicator of Spatial Association. *Resources, Conservation and Recycling* **2020**, *160*, doi:10.1016/j.resconrec.2020.104880.
2714. Soo, V.; Doolan, M.; Compston, P.; Duflou, J.; Peeters, J.; Umeda, Y. The Influence of End-of-Life Regulation on Vehicle Material Circularity: A Comparison of Europe, Japan, Australia and the US. *Resources, Conservation and Recycling* **2021**, *168*, doi:10.1016/j.resconrec.2020.105294.
2715. Steuer, B.; Staudner, M.; Ramusch, R. Role and Potential of the Circular Economy in Managing End-of-Life Ships in China. *Resources, Conservation and Recycling* **2021**, *164*, doi:10.1016/j.resconrec.2020.105039.
2716. Stewart, D.J.C.; Barron, A.R. Pyrometallurgical Removal of Zinc from Basic Oxygen Steelmaking Dust – A Review of Best Available Technology. *Resources, Conservation and Recycling* **2020**, *157*, doi:10.1016/j.resconrec.2020.104746.
2717. Stewart, D.J.C.; Thomson, D.; Barron, A.R. The Production of High Value Pig Iron Nuggets from Steelmaking By-Products – A Thermodynamic Evaluation. *Resources, Conservation and Recycling* **2021**, *170*, doi:10.1016/j.resconrec.2021.105592.
2718. Tan, J.; Wehde, M.V.; Brønd, F.; Kalvig, P. Traded Metal Scrap, Traded Alloying Elements: A Case Study of Denmark and Implications for Circular Economy. *Resources, Conservation and Recycling* **2021**, *168*, doi:10.1016/j.resconrec.2020.105242.
2719. Tang, S.; Zhang, L.; Hao, Y.; Chang, Y.; Liu, G.; Liu, Q.; Li, X. System Dynamics Modeling for Construction Material Flows of Urban Residential Building: A Case Study of Beijing, China. *Resources, Conservation and Recycling* **2021**, *168*, doi:10.1016/j.resconrec.2020.105298.
2720. Tazi, N.; Kim, J.; Bouzidi, Y.; Chatelet, E.; Liu, G. Waste and Material Flow Analysis in the End-of-Life Wind Energy System. *Resources, Conservation and Recycling* **2019**, *145*, 199–207, doi:10.1016/j.resconrec.2019.02.039.
2721. Thakare, A.A.; Singh, A.; Gupta, V.; Siddique, S.; Chaudhary, S. Sustainable Development of Self-Compacting Cementitious Mixes Using Waste Originated Fibers: A Review. *Resources, Conservation and Recycling* **2021**, *168*, doi:10.1016/j.resconrec.2020.105250.

2722. Vilaysouk, X.; Islam, K.; Miatto, A.; Schandl, H.; Murakami, S.; Hashimoto, S. Estimating the Total In-Use Stock of Laos Using Dynamic Material Flow Analysis and Nighttime Light. *Resources, Conservation and Recycling* **2021**, *170*, doi:10.1016/j.resconrec.2021.105608.
2723. Viry, E.; Tran, L.; Pasquier, L.; Blais, J.; Mercier, G. Valorization of Apatite Mining Flotation Residues by the Manufacture of Artificial Aggregates. *Resources, Conservation and Recycling* **2021**, *171*, doi:10.1016/j.resconrec.2021.105605.
2724. Wang, W.; He, Y.; Wu, Y.; Pan, D. Impact of Waste Slag Reuse on the Sustainability of the Secondary Lead Industry Evaluated from an Emergy Perspective. *Resources, Conservation and Recycling* **2021**, *167*, doi:10.1016/j.resconrec.2020.105386.
2725. Wang, X.; Lu, X.; Turvey, C.C.; Dipple, G.M.; Ni, W. Evaluation of the Carbon Sequestration Potential of Steel Slag in China Based on Theoretical and Experimental Labile Ca. *Resources, Conservation and Recycling* **2022**, *186*, doi:10.1016/j.resconrec.2022.106590.
2726. Wang, X.; Wei, Y.; Shao, Q. Decomposing the Decoupling of CO<sub>2</sub> Emissions and Economic Growth in China's Iron and Steel Industry. *Resources, Conservation and Recycling* **2020**, *152*, doi:10.1016/j.resconrec.2019.104509.
2727. Watari, T.; Nansai, K.; Nakajima, K. Major Metals Demand, Supply, and Environmental Impacts to 2100: A Critical Review. *Resources, Conservation and Recycling* **2021**, *164*, doi:10.1016/j.resconrec.2020.105107.
2728. Watari, T.; McLellan, B.C.; Giurco, D.; Dominish, E.; Yamasue, E.; Nansai, K. Total Material Requirement for the Global Energy Transition to 2050: A Focus on Transport and Electricity. *Resources, Conservation and Recycling* **2019**, *148*, 91–103, doi:10.1016/j.resconrec.2019.05.015.
2729. Watari, T.; Nansai, K.; Nakajima, K. Review of Critical Metal Dynamics to 2050 for 48 Elements. *Resources, Conservation and Recycling* **2020**, *155*, doi:10.1016/j.resconrec.2019.104669.
2730. Wei, F.; Tan, Q.; Dong, K.; Li, J. Revealing the Feasibility and Environmental Benefits of Replacing Disposable Plastic Tableware in Aviation Catering: An AHP-LCA Integrated Study. *Resources, Conservation and Recycling* **2022**, *187*, doi:10.1016/j.resconrec.2022.106615.
2731. Wei, H.; Zhou, A.; Liu, T.; Zou, D.; Jian, H. Dynamic and Environmental Performance of Eco-Friendly Ultra-High Performance Concrete Containing Waste Cathode Ray Tube Glass as a Substitution of River Sand. *Resources, Conservation and Recycling* **2020**, *162*, doi:10.1016/j.resconrec.2020.105021.
2732. Wu, F.; Yu, Q.; Gauvin, F.; Brouwers, H.J.H. A Facile Manufacture of Highly Adsorptive Aggregates Using Steel Slag and Porous Expanded Silica for Phosphorus Removal. *Resources, Conservation and Recycling* **2021**, *166*, doi:10.1016/j.resconrec.2020.105238.
2733. Wu, H.; Zuo, J.; Zillante, G.; Wang, J.; Duan, H. Environmental Impacts of Cross-Regional Mobility of Construction and Demolition Waste: An Australia Study. *Resources, Conservation and Recycling* **2021**, *174*,

- doi:10.1016/j.resconrec.2021.105805.
2734. Wu, J.; Lv, J.; Shang, J.; Guo, Y.; Pu, G. Evaluating Chromium Coupled with Carbon Metabolism and Environmental Performance in the Chromate Industrial Symbiosis Network in China. *Resources, Conservation and Recycling* **2019**, *149*, 188–196, doi:10.1016/j.resconrec.2019.05.016.
2735. Yang, D.; Guo, J.; Sun, L.; Shi, F.; Liu, J.; Tanikawa, H. Urban Buildings Material Intensity in China from 1949 to 2015. *Resources, Conservation and Recycling* **2020**, *159*, doi:10.1016/j.resconrec.2020.104824.
2736. Yang, J.; Firsbach, F.; Sohn, I. Pyrometallurgical Processing of Ferrous Slag “Co-Product” Zero Waste Full Utilization: A Critical Review. *Resources, Conservation and Recycling* **2022**, *178*, doi:10.1016/j.resconrec.2021.106021.
2737. Yang, J.; Zhang, L.; Chang, Y.; Hao, Y.; Liu, G.; Yan, Q.; Zhao, Y. Understanding the Material Efficiency of the Wind Power Sector in China: A Spatial-Temporal Assessment. *Resources, Conservation and Recycling* **2020**, *155*, doi:10.1016/j.resconrec.2019.104668.
2738. Yang, J.; Zhang, L.; Chang, Y.; Hao, Y.; Liu, G.; Yan, Q.; Zhao, Y. Understanding the Material Efficiency of the Wind Power Sector in China: A Spatial-Temporal Assessment. *Resources, Conservation and Recycling* **2020**, *155*, doi:10.1016/j.resconrec.2019.104668.
2739. Yokoi, R.; Nakatani, J.; Hatayama, H.; Moriguchi, Y. Dynamic Analysis of In-Use Copper Stocks by the Final Product and End-Use Sector in Japan with Implication for Future Demand Forecasts. *Resources, Conservation and Recycling* **2022**, *180*, doi:10.1016/j.resconrec.2022.106153.
2740. Yu, B.; An, R.; Zhao, G. Spatial and Temporal Disparity of the In-Use Steel Stock for China. *Resources, Conservation and Recycling* **2020**, *155*, doi:10.1016/j.resconrec.2019.104667.
2741. Zhang, Q. Energy and Resource Conservation and Air Pollution Abatement in China’s Iron and Steel Industry. *Resources, Conservation and Recycling* **2019**, *147*, 67–84, doi:10.1016/j.resconrec.2019.04.018.
2742. Zhang, S.; Ghoulah, Z.; Liu, J.; Shao, Y. Converting Ladle Slag into High-Strength Cementing Material by Flue Gas Carbonation at Different Temperatures. *Resources, Conservation and Recycling* **2021**, *174*, doi:10.1016/j.resconrec.2021.105819.
2743. Zhang, Z.; Matsubae, K.; Nakajima, K. Impact of Remanufacturing on the Reduction of Metal Losses through the Life Cycles of Vehicle Engines. *Resources, Conservation and Recycling* **2021**, *170*, doi:10.1016/j.resconrec.2021.105614.
2744. Zhao, X.; Zhang, C.; Liu, B.; Zhao, H.; Gao, X.; Wang, Y.; Zhang, Y.; Liu, D.; Wang, C.-C. Resource Mining from Stainless Steel Pickling Wastewater to Produce Metal-Organic Frameworks. *Resources, Conservation and Recycling* **2023**, *188*, doi:10.1016/j.resconrec.2022.106647.
2745. Zhong, L.; Liu, X.; Yang, P.; Zhong, X.; Zeng, X.; Zou, C.; Xu, X. Quantifying the Spatiotemporal Evolution of the In-Use Steel Stock in Countries along the Belt and

- Road. *Resources, Conservation and Recycling* **2022**, *181*, doi:10.1016/j.resconrec.2022.106226.
2746. Zhu, Y.; Chappuis, L.; De Kleine, R.; Kim, H.; Wallington, T.; Luckey, G.; Cooper, D. The Coming Wave of Aluminum Sheet Scrap from Vehicle Recycling in the United States. *Resources, Conservation and Recycling* **2021**, *164*, doi:10.1016/j.resconrec.2020.105208.
2747. Bolhari, A.; Castaneda, D.I.; Arehart, J.H.; Tillema, S.J. Performance Analysis and Life Cycle Assessment of Acrylic Concrete Structures for Rainwater Harvesting. *Resources, Conservation and Recycling Advances* **2022**, *13*, doi:10.1016/j.rcradv.2022.200063.
2748. Fisher, L.V.; Barron, A.R. Effect of Functionalized and Unfunctionalized Basic Oxygen Steelmaking Slag on the Growth of Cereal Wheat (*Triticum Aestivum*). *Resources, Conservation and Recycling Advances* **2022**, *15*, doi:10.1016/j.rcradv.2022.200092.
2749. Li, Y.; Lv, M.; Li, R.; Liu, Z. Life Cycle Assessment of Melting Reduction Treatment for Iron and Steel Waste Slag: A Case Study in Tangshan, China. *Resources, Conservation and Recycling Advances* **2022**, *15*, doi:10.1016/j.rcradv.2022.200108.
2750. Stewart, D.J.C.; Scrimshire, A.; Thomson, D.; Bingham, P.A.; Barron, A.R. The Chemical Suitability for Recycling of Zinc Contaminated Steelmaking By-Product Dusts: The Case of the UK Steel Plant. *Resources, Conservation and Recycling Advances* **2022**, *14*, doi:10.1016/j.rcradv.2022.200073.
2751. Tang, Z.; Li, W.; Tam, V.W.Y.; Xue, C. Advanced Progress in Recycling Municipal and Construction Solid Wastes for Manufacturing Sustainable Construction Materials. *Resources, Conservation and Recycling: X* **2020**, *6*, doi:10.1016/j.rcrx.2020.100036.
2752. Reddy, K.R.; Gopakumar, A.; Chetri, J.K. Critical Review of Applications of Iron and Steel Slags for Carbon Sequestration and Environmental Remediation. *Reviews in Environmental Science and Biotechnology* **2019**, *18*, 127–152, doi:10.1007/s11157-018-09490-w.
2753. de Carvalho, C.B.; Pereira, E.L.; Dos Santos, A.B. Reliability Analysis as a Support Tool for Projects Focusing on Non-Potable Uses of Treated Wastewater in Steel Industries. *Revista Ambiente e Agua* **2022**, *17*, doi:10.4136/ambi-agua.2781.
2754. Fonseca, A.A.; Ginoris, Y.P.; Gontijo, N.M.P.; de Souza, M.A.A. Removal of Organic Matter from Pre-Treated Domestic Sewage in Anaerobic Biological Reactor by a Combined System of Electrolytic and Biological Aerobic Treatment. *Revista Ambiente e Agua* **2019**, *14*, doi:10.4136/ambi-agua.2349.
2755. Pagliari, B.G.; Moreira, M.F.R.; Mannarino, C.F.; Dos Santos, G.B. Risk of Exposure to Metals in Soil Contaminated by Steel Industry Waste for a Population in Volta Redonda, RJ. *Revista Ambiente e Agua* **2021**, *16*, doi:10.4136/ambi-agua.2696.
2756. de Souza, M.S.P.A.; Dos Santos, F.S.; Magalhães, L.M.S.; de Freitas, W.K.; de Gois, G.; de Oliveira Júnior, J.F. Poincianella Pluviosa as Biomonitor of Heavy Metals in the Municipality of Volta Redonda, RJ, Brazil. *Revista Brasileira de Engenharia*

- Agricola e Ambiental* **2019**, *23*, 71–76, doi:10.1590/1807-1929/agriambi.v23n1p71-76.
2757. Guerra, L.C.; Vieira, E.M. Socio-Environmental Vulnerability Analysis of the Piracicaba River Basin as an Environmental Indicator for the Management of Water Resources. *Revista Brasileira de Geografia Fisica* **2022**, *15*, 1926–1946, doi:10.26848/rbgf.v15.4.p1926-1946.
2758. De Oliveira, U.R.; Lemos, M.L.K.B.; De Barros Avila Canedo, A.C.; De Abreu, P.A.F. EVALUATION OF THE GREEN SUPPLY CHAIN MANAGEMENT OF A STEELMAKER BASED ON ENVIRONMENTAL INDICATORS. *Revista de Gestao Social e Ambiental* **2022**, *16*, doi:10.24857/rgsa.v16.2830.
2759. Campos, A.M.A.; Novack, K.; Assis, P.S. Selection of Materials for Blast Furnace Injection Using Quality Indicators. *Revista Escola de Minas* **2019**, *72*, 119–123, doi:10.1590/0370-44672018720025.
2760. Ferreira, F.B.; Flores, B.D.; Osório, E.; Vilela, A.C.F. Evaluation of Zinc Removal and Compressive Strength of Self-Reducing Pellets Composed of Electric Arc Furnace Dust. *Revista Escola de Minas* **2019**, *72*, 71–77, doi:10.1590/0370-44672017720190.
2761. Lemos, L.R.; da Rocha, S.H.F.S.; de Castro, L.F.A.; Assunção, G.B.M.; da Silva, G.L.R. Mechanical Strength of Briquettes for Use in Blast Furnaces. *Revista Escola de Minas* **2019**, *72*, 63–69, doi:10.1590/0370-44672017720156.
2762. Passos, L.; Moreno Júnior, A.L.; Fernandes, B.; Costa, C.N. Bond between Steel and Concrete Made with Ceramic Waste Aggregate. *Revista Escola de Minas* **2019**, *72*, 31–37, doi:10.1590/0370-44672018720082.
2763. Li, Y.; Wang, X.-P.; Dong, W.-Y.; Shi, L.-Q. STEEL FIBERS FROM WASTE TIRES AS REINFORCEMENTS IN CONCRETE: ANALYSIS OF BOND MECHANISM. *Revista Internacional de Contaminacion Ambiental* **2022**, *38*, 41–58, doi:10.20937/RICA.54406.
2764. Li, Y.; Zhao, R.-H.; Dong, W.-Y.; Jiang, Q.-R. STUDY ON BONDING COMPRESSION-SHEAR PERFORMANCE BETWEEN INDUSTRIAL GREEN FIBER-REINFORCED CONCRETE AND OLD CONCRETE. *Revista Internacional de Contaminacion Ambiental* **2022**, *38*, 81–98, doi:10.20937/RICA.54416.
2765. Li, Y.; Zhao, R.-H.; Dong, W.-Y.; Chen, G. STUDY ON EQUIVALENT FRACTURE TOUGHNESS OF RECYCLED STEEL FIBER-REINFORCED CONCRETE BASED ON DIGITAL IMAGE CORRELATION TECHNOLOGY. *Revista Internacional de Contaminacion Ambiental* **2022**, *38*, 59–80, doi:10.20937/RICA.54407.
2766. Nazer, A.; Honores, A.; Chulak, P.; Pavez, O. Sustainable Concrete Based on Out-of-Use Tire Fibers. *Revista Internacional de Contaminacion Ambiental* **2019**, *35*, 723–729, doi:10.20937/RICA.2019.35.03.17.
2767. Millo, F.; Piano, A.; Roggio, S.; Bianco, A.; Pesce, F.C.; Vassallo, A.L. Numerical Assessment of Additive Manufacturing-Enabled Innovative Piston Bowl Design for a Light-Duty Diesel Engine Achieving Ultra-Low Engine-Out Soot Emissions. *SAE International Journal of Engines* **2021**, *15*, doi:10.4271/03-15-03-0022.
2768. Aralov, O.V.; Buyanov, I.V.; Vyunov, S.I.; Tkachuk, M.A. Improvement of the



- Conformity Assessment System for the Improvement of Pipe Products Quality. *Science and Technologies: Oil and Oil Products Pipeline Transportation* **2021**, *11*, 328–337, doi:10.28999/2541-9595-2021-11-3-328-337.
2769. Belostotsky, M.A.; Korolenok, A.M. Experimental Substantiation of the Corrosion Rate of Pipe Steel. *Science and Technologies: Oil and Oil Products Pipeline Transportation* **2021**, *11*, 407–411, doi:10.28999/2541-9595-2021-11-4-407-411.
2770. Goncharov, N.G.; Yushin, A.A.; Kolesnikov, O.I.; Nesterov, G.V.; Azarin, A.I. Research of Influence of Heat Treatment on Metallophysical Properties of Metal of Welded Seams. *Science and Technologies: Oil and Oil Products Pipeline Transportation* **2021**, *11*, 412–419, doi:10.28999/2541-9595-2021-11-4-412-419.
2771. Latypov, O.R.; Latypova, D.R.; Dzhumabaev, K.K.; Tlyasheva, R.R. Application of Zinc Coating to Protect the Inner Surface of Main Oil Pipeline. *Science and Technologies: Oil and Oil Products Pipeline Transportation* **2022**, *12*, 262–267, doi:10.28999/2541-9595-2022-12-3-262-267.
2772. Likhovtsev, M.V.; Shchurova, E.V.; Soshchenko, A.E. Ensuring the Reliable Operation of Tanks Using Leakage Control Systems: Innovation and Economics. *Science and Technologies: Oil and Oil Products Pipeline Transportation* **2021**, *11*, 56–64, doi:10.28999/2541-9595-2021-11-1-56-64.
2773. Matvienko, Y.G.; Kuzmin, D.A.; Zatsarinnyy, V.V.; Pugachev, M.S.; Potapov, V.V. Substantiation of Probabilistic Safety Factors as a Factor for Optimizing the Metal Consumption of Pipelines and the Permissible Operating Pressure. *Science and Technologies: Oil and Oil Products Pipeline Transportation* **2021**, *11*, 364–371, doi:10.28999/2541-9595-2021-11-4-364-371.
2774. Mogilner, L.Yu.; Skuridin, N.N. Laboratory Researches of the Magnetic-Anisotropic Method for Monitoring the Stress-Strain State of Pipelines. *Science and Technologies: Oil and Oil Products Pipeline Transportation* **2021**, *11*, 145–151, doi:10.28999/2541-9595-2021-11-2-145-151.
2775. Revin, P.O.; Makarenko, A.V.; Harisov, R.A.; Farhetdinov, I.R. Research of Underwater Applied Coatings for Corrosion Protection of Port Facilities. *Science and Technologies: Oil and Oil Products Pipeline Transportation* **2022**, *12*, 385–393, doi:10.28999/2541-9595-2022-12-4-385-393.
2776. Savchenkov, S.V.; Isupova, E.V.; Aginey, R.V. Study of the Possibility of Using Magnetic Field Sensors for Measuring Direct Current in Steel Pipelines. *Science and Technologies: Oil and Oil Products Pipeline Transportation* **2022**, *12*, 268–276, doi:10.28999/2541-9595-2022-12-3-268-276.
2777. Zhou, M.; Wang, X. Influence of Photovoltaic Power Station Engineering on Soil and Vegetation: Taking the Gobi Desert Area in the Hexi Corridor of Gansu as an Example. *Science of Soil and Water Conservation* **2019**, *17*, 132–138, doi:10.16843/j.sswc.2019.02.016.
2778. Adorno, H.A.; Souza, I.D.C.; Monferrán, M.V.; Wunderlin, D.A.; Fernandes, M.N.; Monteiro, D.A. A Multi-Biomarker Approach to Assess the Sublethal Effects of Settleable Atmospheric Particulate Matter from an Industrial Area on Nile Tilapia

- (*Oreochromis Niloticus*). *Science of the Total Environment* **2023**, 856, doi:10.1016/j.scitotenv.2022.159168.
2779. Andrade, G.C.; Santana, B.V.N.; Rinaldi, M.C.S.; Ferreira, S.O.; Silva, R.C.D.; Silva, L.C.D. Leaf Surface Traits Related to Differential Particle Adsorption – A Case Study of Two Tropical Legumes. *Science of the Total Environment* **2022**, 823, doi:10.1016/j.scitotenv.2022.153681.
2780. Baena-Moreno, F.M.; Cid-Castillo, N.; Arellano-García, H.; Reina, T.R. Towards Emission Free Steel Manufacturing – Exploring the Advantages of a CO<sub>2</sub> Methanation Unit to Minimize CO<sub>2</sub> Emissions. *Science of the Total Environment* **2021**, 781, doi:10.1016/j.scitotenv.2021.146776.
2781. Bertocci, I.; Dell’Anno, A.; Musco, L.; Gambi, C.; Saggiomo, V.; Cannavacciuolo, M.; Lo Martire, M.; Passarelli, A.; Zazo, G.; Danovaro, R. Multiple Human Pressures in Coastal Habitats: Variation of Meiofaunal Assemblages Associated with Sewage Discharge in a Post-Industrial Area. *Science of the Total Environment* **2019**, 655, 1218–1231, doi:10.1016/j.scitotenv.2018.11.121.
2782. Brain, R.; Goodwin, G.; Abi-Akar, F.; Lee, B.; Rodgers, C.; Flatt, B.; Lynn, A.; Kruger, G.; Perkins, D. Winds of Change, Developing a Non-Target Plant Bioassay Employing Field-Based Pesticide Drift Exposure: A Case Study with Atrazine. *Science of the Total Environment* **2019**, 678, 239–252, doi:10.1016/j.scitotenv.2019.04.411.
2783. Cao, X.; Wen, Z.; Zhao, X.; Wang, Y.; Zhang, H. Quantitative Assessment of Energy Conservation and Emission Reduction Effects of Nationwide Industrial Symbiosis in China. *Science of the Total Environment* **2020**, 717, doi:10.1016/j.scitotenv.2020.137114.
2784. Castellani, F.; Massimi, L.; Vitali, M.; Canepari, S.; Guidotti, M.; Conti, M.E.; Protano, C. High Spatial Resolution Analysis of Polybrominated Diphenyl Ethers (PBDEs) Using Transplanted Lichen *Evernia Prunastri*: A Case Study in Central Italy. *Science of the Total Environment* **2020**, 742, doi:10.1016/j.scitotenv.2020.140590.
2785. Chen, C.; Huang, L.; Shi, J.; Zhou, Y.; Wang, J.; Yao, X.; Gao, H.; Liu, Y.; Xing, J.; Liu, X. Atmospheric Outflow of Anthropogenic Iron and Its Deposition to China Adjacent Seas. *Science of the Total Environment* **2021**, 750, doi:10.1016/j.scitotenv.2020.141302.
2786. Chen, J.; Xing, Y.; Wang, Y.; Zhang, W.; Guo, Z.; Su, W. Application of Iron and Steel Slags in Mitigating Greenhouse Gas Emissions: A Review. *Science of the Total Environment* **2022**, 844, doi:10.1016/j.scitotenv.2022.157041.
2787. Cheng, H.; Song, Y.; Bian, Y.; Ji, R.; Wang, F.; Gu, C.; Yang, X.; Ye, M.; Ouyang, G.; Jiang, X. Meso-/Microporous Carbon as an Adsorbent for Enhanced Performance in Solid-Phase Microextraction of Chlorobenzenes. *Science of the Total Environment* **2019**, 681, 392–399, doi:10.1016/j.scitotenv.2019.05.150.
2788. Cheng, J.; Liu, S.; Guo, W.; Song, Y.; Kumar, S.; Kubar, A.A.; Su, Y.; Li, Y. Developing Staggered Woven Mesh Aerator with Three Variable-Micropore Layers in Recycling Water Pipeline to Enhance CO<sub>2</sub> Conversion for Improving

- Arthrospira Growth. *Science of the Total Environment* **2021**, *760*, doi:10.1016/j.scitotenv.2020.143941.
2789. Choi, J.; Lee, M.; Oh, H.; Bae, S.; An, J.; Yun, D.; Park, H. Multi-Objective Green Design Model Tomitigate Environmental Impact of Construction of Mega Columns for Super-Tall Buildings. *Science of the Total Environment* **2019**, *674*, 580–591, doi:10.1016/j.scitotenv.2019.04.152.
2790. Chung, L.; Mata, L.; Carmona, M.; Shubayr, N.; Zhou, Q.; Ye, Y.; Kearfott, K. Radon Kinetics in a Natural Indoor Radon Chamber. *Science of the Total Environment* **2020**, *734*, doi:10.1016/j.scitotenv.2020.139167.
2791. Comber, S.D.W.; Gardner, M.J.; Ellor, B. Perfluorinated Alkyl Substances: Sewage Treatment and Implications for Receiving Waters. *Science of the Total Environment* **2021**, *791*, doi:10.1016/j.scitotenv.2021.148391.
2792. Cui, L.; Ba, K.; Li, F.; Wang, Q.; Ma, Q.; Yuan, X.; Mu, R.; Hong, J.; Zuo, J. Life Cycle Assessment of Ultra-Low Treatment for Steel Industry Sintering Flue Gas Emissions. *Science of the Total Environment* **2020**, *725*, doi:10.1016/j.scitotenv.2020.138292.
2793. Cui, Y.; Ji, D.; Maenhaut, W.; Gao, W.; Zhang, R.; Wang, Y. Levels and Sources of Hourly PM<sub>2.5</sub>-Related Elements during the Control Period of the COVID-19 Pandemic at a Rural Site between Beijing and Tianjin. *Science of the Total Environment* **2020**, *744*, doi:10.1016/j.scitotenv.2020.140840.
2794. Ding, D.; Jiang, D.; Zhou, Y.; Xia, F.; Chen, Y.; Kong, L.; Wei, J.; Zhang, S.; Deng, S. Assessing the Environmental Impacts and Costs of Biochar and Monitored Natural Attenuation for Groundwater Heavily Contaminated with Volatile Organic Compounds. *Science of the Total Environment* **2022**, *846*, doi:10.1016/j.scitotenv.2022.157316.
2795. Do, M.; Ngo, H.; Guo, W.; Chang, S.; Nguyen, D.; Liu, Y.; Varjani, S.; Kumar, M. Microbial Fuel Cell-Based Biosensor for Online Monitoring Wastewater Quality: A Critical Review. *Science of the Total Environment* **2020**, *712*, doi:10.1016/j.scitotenv.2019.135612.
2796. Dobrosz-Gómez, I.; Gómez-García, M.-Á. Integration of Environmental and Economic Performance of Electro-Coagulation-Anodic Oxidation Sequential Process for the Treatment of Soluble Coffee Industrial Effluent. *Science of the Total Environment* **2021**, *764*, doi:10.1016/j.scitotenv.2020.142818.
2797. Du, C.-M.; Gao, X.; Ueda, S.; Kitamura, S.-Y. Recovery of High-Quality Phosphate from Steelmaking Slag by a Hydrometallurgical Process. *Science of the Total Environment* **2022**, *819*, doi:10.1016/j.scitotenv.2022.153125.
2798. Farjana, S.H.; Huda, N.; Mahmud, M.A.P.; Lang, C. A Global Life Cycle Assessment of Manganese Mining Processes Based on EcoInvent Database. *Science of the Total Environment* **2019**, *688*, 1102–1111, doi:10.1016/j.scitotenv.2019.06.184.
2799. Feng, Y.; Du, Y.; Zhou, A.; Zhang, M.; Li, J.; Zhou, S.; Xia, W. Geoenvironmental Properties of Industrially Contaminated Site Soil Solidified/Stabilized with a Sustainable by-Product-Based Binder. *Science of the Total Environment* **2021**, *765*,

- doi:10.1016/j.scitotenv.2020.142778.
2800. Fiore, S.; Ibanescu, D.; Teodosiu, C.; Ronco, A. Improving Waste Electric and Electronic Equipment Management at Full-Scale by Using Material Flow Analysis and Life Cycle Assessment. *Science of the Total Environment* **2019**, *659*, 928–939, doi:10.1016/j.scitotenv.2018.12.417.
2801. Galgo, S.; Lim, J.; Canatoy, R.; Ha, J.; Sohn, K.; Kim, P. Improving Methane Mitigating Functionality of Blast Furnace Slag by Adding Electron Acceptor. *Science of the Total Environment* **2022**, *845*, doi:10.1016/j.scitotenv.2022.157296.
2802. Galvão, E.S.; Reis, N.C., Jr; Lima, A.T.; Stuetz, R.M.; D'Azeredo Orlando, M.T.; Santos, J.M. Use of Inorganic and Organic Markers Associated with Their Directionality for the Apportionment of Highly Correlated Sources of Particulate Matter. *Science of the Total Environment* **2019**, *651*, 1332–1343, doi:10.1016/j.scitotenv.2018.09.263.
2803. Gan, J.; Chen, M.; Semple, K.; Liu, X.; Dai, C.; Tu, Q. Life Cycle Assessment of Bamboo Products: Review and Harmonization. *Science of the Total Environment* **2022**, *849*, doi:10.1016/j.scitotenv.2022.157937.
2804. Gao, C.; Gao, W.; Song, K.; Na, H.; Tian, F.; Zhang, S. Comprehensive Evaluation on Energy-Water Saving Effects in Iron and Steel Industry. *Science of the Total Environment* **2019**, *670*, 346–360, doi:10.1016/j.scitotenv.2019.03.101.
2805. Gao, C.; Yu, W.; Zhu, Y.; Wang, M.; Tang, Z.; Du, L.; Hu, M.; Fang, L.; Xiao, X. Preparation of Porous Silicate Supported Micro-Nano Zero-Valent Iron from Copper Slag and Used as Persulfate Activator for Removing Organic Contaminants. *Science of the Total Environment* **2021**, *754*, doi:10.1016/j.scitotenv.2020.142131.
2806. Gao, Y.; Zhang, L.; Huang, A.; Kou, W.; Bo, X.; Cai, B.; Qu, J. Unveiling the Spatial and Sectoral Characteristics of a High-Resolution Emission Inventory of CO<sub>2</sub> and Air Pollutants in China. *Science of the Total Environment* **2022**, *847*, doi:10.1016/j.scitotenv.2022.157623.
2807. Ghazouani, M.; Akrou, H.; Jellali, S.; Bousselmi, L. Comparative Study of Electrochemical Hybrid Systems for the Treatment of Real Wastewaters from Agri-Food Activities. *Science of the Total Environment* **2019**, *647*, 1651–1664, doi:10.1016/j.scitotenv.2018.08.023.
2808. Ghenai, C.; Inayat, A.; Shanableh, A.; Al-Sarairah, E.; Janajreh, I. Combustion and Emissions Analysis of Spent Pot Lining (SPL) as Alternative Fuel in Cement Industry. *Science of the Total Environment* **2019**, *684*, 519–526, doi:10.1016/j.scitotenv.2019.05.157.
2809. Guerrieri, M.; Maini Lo Casto, B.; Peri, G.; Rizzo, G. Smart vs Conventional Motorways: Environmental Impact Assessment under Realistic Traffic Conditions. *Science of the Total Environment* **2020**, *727*, doi:10.1016/j.scitotenv.2020.138521.
2810. Han, D.; Fu, Q.; Gao, S.; Hu, Z.; Zhang, X.; Chen, X.; Feng, J.; Cheng, J.; Wang, W. Two-Year Monitoring of Gaseous Elementary Mercury in a Typical Iron–Steel

- Plant in Yangtze River Delta, China: Characterization and Estimation of Its Dynamic Oxidation. *Science of the Total Environment* **2019**, *657*, 1217–1226, doi:10.1016/j.scitotenv.2018.12.133.
2811. Heiderscheidt, E.; Postila, H.; Leiviskä, T. Removal of Metals from Wastewaters by Mineral and Biomass-Based Sorbents Applied in Continuous-Flow Continuous Stirred Tank Reactors Followed by Sedimentation. *Science of the Total Environment* **2020**, *700*, doi:10.1016/j.scitotenv.2019.135079.
2812. Hernández-Pellón, A.; Fernández-Olmo, I. Using Multi-Site Data to Apportion PM-Bound Metal(Loid)s: Impact of a Manganese Alloy Plant in an Urban Area. *Science of the Total Environment* **2019**, *651*, 1476–1488, doi:10.1016/j.scitotenv.2018.09.261.
2813. Huang, Q.; Chen, G.; Wang, Y.; Xu, L.; Chen, W.-Q. Identifying the Socioeconomic Drivers of Solid Waste Recycling in China for the Period 2005–2017. *Science of the Total Environment* **2020**, *725*, doi:10.1016/j.scitotenv.2020.138137.
2814. Huo, T.; Ren, H.; Cai, W. Estimating Urban Residential Building-Related Energy Consumption and Energy Intensity in China Based on Improved Building Stock Turnover Model. *Science of the Total Environment* **2019**, *650*, 427–437, doi:10.1016/j.scitotenv.2018.09.008.
2815. Jakub, S.; Adrian, L.; Mieczysław, B.; Ewelina, B.; Katarzyna, Z. Life Cycle Assessment Study on the Public Transport Bus Fleet Electrification in the Context of Sustainable Urban Development Strategy. *Science of the Total Environment* **2022**, *824*, doi:10.1016/j.scitotenv.2022.153872.
2816. Jin, H.; Dai, W.; Li, Y.; Hu, X.; Zhu, J.; Wu, P.; Wang, W.; Zhang, Q. Semi-Volatile Organic Compounds in Tap Water from Hangzhou, China: Influence of Pipe Material and Implication for Human Exposure. *Science of the Total Environment* **2019**, *677*, 671–678, doi:10.1016/j.scitotenv.2019.04.387.
2817. Juda-Rezler, K.; Reizer, M.; Maciejewska, K.; Błaszczak, B.; Klejnowski, K. Characterization of Atmospheric PM<sub>2.5</sub> Sources at a Central European Urban Background Site. *Science of the Total Environment* **2020**, *713*, doi:10.1016/j.scitotenv.2020.136729.
2818. Kaczmarek, H.; Tyszkowski, S.; Bartczak, A.; Kramkowski, M.; Wasak, K. The Role of Freeze-Thaw Action in Dam Reservoir Cliff Degradation Assessed by Terrestrial Laser Scanning: A Case Study of Jeziorsko Reservoir (Central Poland). *Science of the Total Environment* **2019**, *690*, 1140–1150, doi:10.1016/j.scitotenv.2019.07.032.
2819. Karla, M.-R.; Alejandra, V.-A.C.; Lenys, F.; Patricio, E.-M. Operational Performance of Corncobs/Sawdust Biofilters Coupled to Microbial Fuel Cells Treating Domestic Wastewater. *Science of the Total Environment* **2022**, *809*, doi:10.1016/j.scitotenv.2021.151115.
2820. Kelepertzis, E.; Argyraki, A.; Chrastrný, V.; Botsou, F.; Skordas, K.; Komárek, M.; Fouskas, A. Metal(Loid) and Isotopic Tracing of Pb in Soils, Road and House Dusts from the Industrial Area of Volos (Central Greece). *Science of the Total Environment*

- 2020, 725, doi:10.1016/j.scitotenv.2020.138300.
2821. Khudhur, F.W.K.; MacDonald, J.M.; Macente, A.; Daly, L. The Utilization of Alkaline Wastes in Passive Carbon Capture and Sequestration: Promises, Challenges and Environmental Aspects. *Science of the Total Environment* **2022**, 823, doi:10.1016/j.scitotenv.2022.153553.
2822. Kim, J.-H.; Ko, G.-P.; Son, K.-H.; Ku, B.-H.; Bang, M.-A.; Kang, M.-J.; Park, H.-Y. Arazyme in Combination with Dietary Carbohydrolases Influences Odor Emission and Gut Microbiome in Growing-Finishing Pigs. *Science of the Total Environment* **2022**, 848, doi:10.1016/j.scitotenv.2022.157735.
2823. Lamnatou, C.; Cristofari, C.; Chemisana, D.; Canaletti, J.L. Payback Times and Multiple Midpoint/Endpoint Impact Categories about Building-Integrated Solar Thermal (BIST) Collectors. *Science of the Total Environment* **2019**, 658, 1039–1055, doi:10.1016/j.scitotenv.2018.12.110.
2824. Lamnatou, C.; Smyth, M.; Chemisana, D. Building-Integrated Photovoltaic/Thermal (BIPVT): LCA of a Façade-Integrated Prototype and Issues about Human Health, Ecosystems, Resources. *Science of the Total Environment* **2019**, 660, 1576–1592, doi:10.1016/j.scitotenv.2018.12.461.
2825. Li, L.; Ling, T.; Pan, S. Environmental Benefit Assessment of Steel Slag Utilization and Carbonation: A Systematic Review. *Science of the Total Environment* **2022**, 806, doi:10.1016/j.scitotenv.2021.150280.
2826. Liang, S.-Y.; Cui, J.-L.; Bi, X.-Y.; Luo, X.-S.; Li, X.-D. Deciphering Source Contributions of Trace Metal Contamination in Urban Soil, Road Dust, and Foliar Dust of Guangzhou, Southern China. *Science of the Total Environment* **2019**, 695, doi:10.1016/j.scitotenv.2019.133596.
2827. Lim, J.; Kang, Y.; Sohn, K.; Kim, P.; Galgo, S. Creating New Value of Blast Furnace Slag as Soil Amendment to Mitigate Methane Emission and Improve Rice Cropping Environments. *Science of the Total Environment* **2022**, 806, doi:10.1016/j.scitotenv.2021.150961.
2828. Lin, S.; Yin, X.; Yang, X.; Wang, W.; Wang, C.; Sardans, J.; Tariq, A.; Zeng, F.; Alrefaei, A.F.; Peñuelas, J. Effects of Combined Applications of Straw with Industrial and Agricultural Wastes on Greenhouse Gases Emissions, Temperature Sensitivity, and Rice Yield in a Subtropical Paddy Field. *Science of the Total Environment* **2022**, 840, doi:10.1016/j.scitotenv.2022.156674.
2829. Liu, L.; Sun, Y.; Kleinmeyer, Z.; Habil, G.; Yang, Q.; Zhao, L.; Rosso, D. Microplastics Separation Using Stainless Steel Mini-Hydrocyclones Fabricated with Additive Manufacturing. *Science of the Total Environment* **2022**, 840, doi:10.1016/j.scitotenv.2022.156697.
2830. Liu, M.; Lv, J.; Qin, C.; Zhang, H.; Wu, L.; Guo, W.; Guo, C.; Xu, J. Chemical Fingerprinting of Organic Micropollutants in Different Industrial Treated Wastewater Effluents and Their Effluent-Receiving River. *Science of the Total Environment* **2022**, 838, doi:10.1016/j.scitotenv.2022.156399.
2831. Liu, X.; Peng, R.; Bai, C.; Chi, Y.; Li, H.; Guo, P. Technological Roadmap towards

- Optimal Decarbonization Development of China's Iron and Steel Industry. *Science of the Total Environment* **2022**, *850*, doi:10.1016/j.scitotenv.2022.157701.
2832. Liu, Y.; Yan, C.; Gao, J.; Wu, X.; Zhang, B. Mapping the Changes of CH<sub>4</sub> Emissions in Global Supply Chains. *Science of the Total Environment* **2022**, *832*, doi:10.1016/j.scitotenv.2022.155019.
2833. Lu, X.; von Haxthausen, K.A.; Brock, A.L.; Trapp, S. Turnover of Lake Sediments Treated with Sediment Microbial Fuel Cells: A Long-Term Study in a Eutrophic Lake. *Science of the Total Environment* **2021**, *796*, doi:10.1016/j.scitotenv.2021.148880.
2834. Magiera, T.; Górka-Kostrubiec, B.; Szumiata, T.; Wawer, M. Technogenic Magnetic Particles from Steel Metallurgy and Iron Mining in Topsoil: Indicative Characteristic by Magnetic Parameters and Mössbauer Spectra. *Science of the Total Environment* **2021**, *775*, doi:10.1016/j.scitotenv.2021.145605.
2835. McCay, A.T.; Feliks, M.E.J.; Roberts, J.J. Life Cycle Assessment of the Carbon Intensity of Deep Geothermal Heat Systems: A Case Study from Scotland. *Science of the Total Environment* **2019**, *685*, 208–219, doi:10.1016/j.scitotenv.2019.05.311.
2836. Mooibroek, D.; Sofowote, U.M.; Hopke, P.K. Source Apportionment of Ambient PM<sub>10</sub> Collected at Three Sites in an Urban-Industrial Area with Multi-Time Resolution Factor Analyses. *Science of the Total Environment* **2022**, *850*, doi:10.1016/j.scitotenv.2022.157981.
2837. Moufarrej, L.; Courcot, D.; Ledoux, F. Assessment of the PM<sub>2.5</sub> Oxidative Potential in a Coastal Industrial City in Northern France: Relationships with Chemical Composition, Local Emissions and Long Range Sources. *Science of the Total Environment* **2020**, *748*, doi:10.1016/j.scitotenv.2020.141448.
2838. Muller, A.; Osterlund, H.; Nordqvist, K.; Marsalek, J.; Viklander, M. Building Surface Materials as Sources of Micropollutants in Building Runoff: A Pilot Study. *Science of the Total Environment* **2019**, *680*, 190–197, doi:10.1016/j.scitotenv.2019.05.088.
2839. Mutuku, J.K.; Lee, Y.-Y.; Huang, B.-W.; Chen, W.-H.; Hou, W.-C. Assessment of the Emission Factors for Potentially Toxic Elements from Coal-Fired Boilers and Sintering Furnaces in a Steel Production Plant. *Science of the Total Environment* **2021**, *792*, doi:10.1016/j.scitotenv.2021.148329.
2840. Newnes, A.T.; Marshall, Y.; Grainger, C.; Neal, M.; Scullion, J.; Gwynn-Jones, D. A Circular Economic Approach to the Phytoextraction of Zn from Basic Oxygen Steelmaking Filtercake Using *Lemna* Minor and CO<sub>2</sub>. *Science of the Total Environment* **2021**, *766*, doi:10.1016/j.scitotenv.2020.144256.
2841. Nguyen, T.K.L.; Ngo, H.H.; Guo, W.; Chang, S.W.; Nguyen, D.D.; Nguyen, T.V.; Nghiem, D.L. Contribution of the Construction Phase to Environmental Impacts of the Wastewater Treatment Plant. *Science of the Total Environment* **2020**, *743*, doi:10.1016/j.scitotenv.2020.140658.
2842. Nguyen, T.K.L.; Ngo, H.H.; Guo, W.; Nghiem, L.D.; Qian, G.; Liu, Q.; Liu, J.; Chen, Z.; Bui, X.T.; Mainali, B. Assessing the Environmental Impacts and Greenhouse Gas Emissions from the Common Municipal Wastewater Treatment Systems.

- Science of the Total Environment* **2021**, *801*, doi:10.1016/j.scitotenv.2021.149676.
2843. Notarnicola, B.; Tassielli, G.; Renzulli, P.A.; Di Capua, R.; Astuto, F.; Mascolo, G.; Murgolo, S.; De Ceglie, C.; Curri, M.L.; Comparelli, R.; et al. Life Cycle Assessment of UV-C Based Treatment Systems for the Removal of Compounds of Emerging Concern from Urban Wastewater. *Science of the Total Environment* **2023**, *857*, doi:10.1016/j.scitotenv.2022.159309.
2844. Nunes, C.R.D.O.; Sánchez, B.; Gatts, C.E.N.; de Almeida, C.M.S.; Canela, M.C. Evaluation of Volatile Organic Compounds Coupled to Seasonality Effects in Indoor Air from a Commercial Office in Madrid (Spain) Applying Chemometric Techniques. *Science of the Total Environment* **2019**, *650*, 868–877, doi:10.1016/j.scitotenv.2018.09.095.
2845. Okoye, P.U.; Longoria, A.; Sebastian, P.J.; Wang, S.; Li, S.; Hameed, B.H. A Review on Recent Trends in Reactor Systems and Azeotrope Separation Strategies for Catalytic Conversion of Biodiesel-Derived Glycerol. *Science of the Total Environment* **2020**, *719*, doi:10.1016/j.scitotenv.2019.134595.
2846. Phan, T.T.; Hakala, J.A.; Sharma, S. Application of Isotopic and Geochemical Signals in Unconventional Oil and Gas Reservoir Produced Waters toward Characterizing in Situ Geochemical Fluid-Shale Reactions. *Science of the Total Environment* **2020**, *714*, doi:10.1016/j.scitotenv.2020.136867.
2847. Poppendieck, D.; Gong, M.; Pham, V. Influence of Temperature, Relative Humidity, and Water Saturation on Airborne Emissions from Cigarette Butts. *Science of the Total Environment* **2020**, *712*, doi:10.1016/j.scitotenv.2019.136422.
2848. Prato-Garcia, D.; Robayo-Avenidaño, A. Treatment of a Synthetic Colored Effluent in Raceway Reactors: The Role of Operational Conditions on the Environmental Performance of a Photo-Fenton Process. *Science of the Total Environment* **2019**, *697*, doi:10.1016/j.scitotenv.2019.134182.
2849. Qi, S.; Xu, Z.; Yang, Z. China's Carbon Allowance Allocation Strategy under the EU Carbon Border Adjustment Mechanism: An Integrated Non-Parametric Cost Frontier Approach. *Science of the Total Environment* **2022**, *831*, doi:10.1016/j.scitotenv.2022.154908.
2850. Rajala, P.; Nuppenen-Puputti, M.; Wheat, C.G.; Carpen, L. Fluctuation in Deep Groundwater Chemistry and Microbial Community and Their Impact on Corrosion of Stainless-Steels. *Science of the Total Environment* **2022**, *824*, doi:10.1016/j.scitotenv.2022.153965.
2851. Ramírez, O.; Sánchez de la Campa, A.M.; Sánchez-Rodas, D.; de la Rosa, J.D. Hazardous Trace Elements in Thoracic Fraction of Airborne Particulate Matter: Assessment of Temporal Variations, Sources, and Health Risks in a Megacity. *Science of the Total Environment* **2020**, *710*, doi:10.1016/j.scitotenv.2019.136344.
2852. Ren, S.; Wei, X.; Wang, J.; Liu, J.; Ouyang, Q.; Jiang, Y.; Hu, H.; Huang, Y.; Zheng, W.; Nicoletto, C.; et al. Unexpected Enrichment of Thallium and Its Geochemical Behaviors in Soils Impacted by Historically Industrial Activities Using Lead-zinc Carbonate Minerals. *Science of the Total Environment* **2022**, *821*,



- doi:10.1016/j.scitotenv.2022.153399.
2853. Rius-Ayra, O.; Llorca-Isern, N. A Robust and Anticorrosion Non-Fluorinated Superhydrophobic Aluminium Surface for Microplastic Removal. *Science of the Total Environment* **2021**, 760, doi:10.1016/j.scitotenv.2020.144090.
2854. Sarkodie, S.A. Causal Effect of Environmental Factors, Economic Indicators and Domestic Material Consumption Using Frequency Domain Causality Test. *Science of the Total Environment* **2020**, 736, doi:10.1016/j.scitotenv.2020.139602.
2855. Schmidt, S.; Kinne, J.; Lautenbach, S.; Blaschke, T.; Lenz, D.; Resch, B. Greenwashing in the US Metal Industry? A Novel Approach Combining SO<sub>2</sub> Concentrations from Satellite Data, a Plant-Level Firm Database and Web Text Mining. *Science of the Total Environment* **2022**, 835, doi:10.1016/j.scitotenv.2022.155512.
2856. Sha, Q.; Lu, M.; Huang, Z.; Yuan, Z.; Jia, G.; Xiao, X.; Wu, Y.; Zhang, Z.; Li, C.; Zhong, Z.; et al. Anthropogenic Atmospheric Toxic Metals Emission Inventory and Its Spatial Characteristics in Guangdong Province, China. *Science of the Total Environment* **2019**, 670, 1146–1158, doi:10.1016/j.scitotenv.2019.03.206.
2857. Shen, J.; Yang, L.; Liu, G.; Zhao, X.; Zheng, M. Occurrence, Profiles, and Control of Unintentional POPs in the Steelmaking Industry: A Review. *Science of the Total Environment* **2021**, 773, doi:10.1016/j.scitotenv.2021.145692.
2858. Shi, P.; Liu, S.; Xia, X.; Qian, J.; Jing, H.; Yuan, J.; Zhao, H.; Wang, F.; Wang, Y.; Wang, X.; et al. Identification of the Hormetic Dose-Response and Regulatory Network of Multiple Metals Co-Exposure-Related Hypertension via Integration of Metallomics and Adverse Outcome Pathways. *Science of the Total Environment* **2022**, 817, doi:10.1016/j.scitotenv.2022.153039.
2859. Shi, Y.; Liu, C.; Zhang, B.; Simayi, M.; Xi, Z.; Ren, J.; Xie, S. Accurate Identification of Key VOCs Sources Contributing to O<sub>3</sub> Formation along the Liaodong Bay Based on Emission Inventories and Ambient Observations. *Science of the Total Environment* **2022**, 844, doi:10.1016/j.scitotenv.2022.156998.
2860. Souza, I.D.C.; Morozesk, M.; Siqueira, P.; Zini, E.; Galter, I.N.; Moraes, D.A.D.; Matsumoto, S.T.; Wunderlin, D.A.; Elliott, M.; Fernandes, M.N. Metallic Nanoparticle Contamination from Environmental Atmospheric Particulate Matter in the Last Slab of the Trophic Chain: Nanocrystallography, Subcellular Localization and Toxicity Effects. *Science of the Total Environment* **2022**, 814, doi:10.1016/j.scitotenv.2021.152685.
2861. Su, M.; Zhu, Z.; Li, T.; Jin, J.; Hu, J. Levels, Profiles and Potential Human Health Risks of Brominated and Parent Polycyclic Aromatic Hydrocarbons in Soils around Three Different Types of Industrial Areas in China. *Science of the Total Environment* **2022**, 846, doi:10.1016/j.scitotenv.2022.157506.
2862. Tan, X.; Deng, Y.; Shu, Z.; Zhang, C.; Ye, S.; Chen, Q.; Yang, H.; Yang, L. Phytoremediation Plants (Ramie) and Steel Smelting Wastes for Calcium Silicate Coated-NZVI/Biochar Production: Environmental Risk Assessment and Efficient As(V) Removal Mechanisms. *Science of the Total Environment* **2022**, 844,

- doi:10.1016/j.scitotenv.2022.156924.
2863. Tao, M.; Cheng, W.; Nie, K.; Zhang, X.; Cao, W. Life Cycle Assessment of Underground Coal Mining in China. *Science of the Total Environment* **2022**, *805*, doi:10.1016/j.scitotenv.2021.150231.
2864. Tripathy, S.; Tunno, B.J.; Michanowicz, D.R.; Kinnee, E.; Shmool, J.L.C.; Gillooly, S.; Clougherty, J.E. Hybrid Land Use Regression Modeling for Estimating Spatio-Temporal Exposures to PM 2.5, BC, and Metal Components across a Metropolitan Area of Complex Terrain and Industrial Sources. *Science of the Total Environment* **2019**, *673*, 54–63, doi:10.1016/j.scitotenv.2019.03.453.
2865. Truong, M.V.; Nguyen, L.N.; Li, K.; Fu, Q.; Johir, M.A.H.; Fontana, A.; Nghiem, L.D. Biomethane Production from Anaerobic Co-Digestion and Steel-Making Slag: A New Waste-to-Resource Pathway. *Science of the Total Environment* **2020**, *738*, doi:10.1016/j.scitotenv.2020.139764.
2866. Umbría-Salinas, K.; Valero, A.; Wallner-Kersanach, M.; de Andrade, C.F.; Santos Yabe, M.J.; Wasserman, J.C.; Kuroshima, K.N.; Zhang, H. Labile Metal Assessment in Water by Diffusive Gradients in Thin Films in Shipyards on the Brazilian Subtropical Coast. *Science of the Total Environment* **2021**, *775*, doi:10.1016/j.scitotenv.2021.145184.
2867. Velandia Vargas, J.E.; Seabra, J.E.A. Fuel-Cell Technologies for Private Vehicles in Brazil: Environmental Mirage or Prospective Romance? A Comparative Life Cycle Assessment of PEMFC and SOFC Light-Duty Vehicles. *Science of the Total Environment* **2021**, *798*, doi:10.1016/j.scitotenv.2021.149265.
2868. Velenturf, A.; Archer, S.; Gomes, H.; Christgen, B.; Lag-Brotons, A.; Purnell, P. Circular Economy and the Matter of Integrated Resources. *Science of the Total Environment* **2019**, *689*, 963–969, doi:10.1016/j.scitotenv.2019.06.449.
2869. Wang, J.; Teng, Y.; Chen, Z.; Bai, J.; Niu, Y.; Duan, H. Assessment of Carbon Emissions of Building Interior Decoration and Renovation Waste Disposal in the Fast-Growing Greater Bay Area, China. *Science of the Total Environment* **2021**, *798*, doi:10.1016/j.scitotenv.2021.149158.
2870. Wang, K.; Wu, K.; Wang, C.; Tong, Y.; Gao, J.; Zuo, P.; Zhang, X.; Yue, T. Identification of NO<sub>x</sub> Hotspots from Oversampled TROPOMI NO<sub>2</sub> Column Based on Image Segmentation Method. *Science of the Total Environment* **2022**, *803*, doi:10.1016/j.scitotenv.2021.150007.
2871. Wang, M.; Lan, X.; Xu, X.; Fang, Y.; Singh, B.P.; Sardans, J.; Romero, E.; Peñuelas, J.; Wang, W. Steel Slag and Biochar Amendments Decreased CO<sub>2</sub> Emissions by Altering Soil Chemical Properties and Bacterial Community Structure over Two-Year in a Subtropical Paddy Field. *Science of the Total Environment* **2020**, *740*, doi:10.1016/j.scitotenv.2020.140403.
2872. Wang, P.; Qi, A.; Huang, Q.; Wang, Y.; Tuo, X.; Zhao, T.; Duan, S.; Gao, H.; Zhang, W.; Xu, P.; et al. Spatial and Temporal Variation, Source Identification, and Toxicity Evaluation of Brominated/Chlorinated/Nitrated/Oxygenated-PAHs at a Heavily Industrialized Area in Eastern China. *Science of the Total Environment* **2022**,

- 822, doi:10.1016/j.scitotenv.2022.153542.
2873. Wang, R.; Wang, X.; Cheng, S.; Wang, K.; Cheng, L.; Zhu, J.; Zheng, H.; Duan, W. Emission Characteristics and Reactivity of Volatile Organic Compounds from Typical High-Energy-Consuming Industries in North China. *Science of the Total Environment* **2022**, 809, doi:10.1016/j.scitotenv.2021.151134.
2874. Wang, S.; Ji, Y.; Zhao, J.; Lin, Y.; Lin, Z. Source Apportionment and Toxicity Assessment of PM<sub>2.5</sub>-Bound PAHs in a Typical Iron-Steel Industry City in Northeast China by PMF-ILCR. *Science of the Total Environment* **2020**, 713, doi:10.1016/j.scitotenv.2019.136428.
2875. Wang, X.; Lei, Y.; Yan, L.; Liu, T.; Zhang, Q.; He, K. A Unit-Based Emission Inventory of SO<sub>2</sub>, NO<sub>x</sub> and PM for the Chinese Iron and Steel Industry from 2010 to 2015. *Science of the Total Environment* **2019**, 676, 18–30, doi:10.1016/j.scitotenv.2019.04.241.
2876. Wang, Y.; Wen, Z.; Cao, X.; Zheng, Z.; Xu, J. Environmental Efficiency Evaluation of China's Iron and Steel Industry: A Process-Level Data Envelopment Analysis. *Science of the Total Environment* **2020**, 707, doi:10.1016/j.scitotenv.2019.135903.
2877. Wang, Y.; Wen, Z.; Dong, J. The City-Level Precision Industrial Emission Reduction Management Based on Enterprise Performance Evaluation and Path Design: A Case of Changzhi, China. *Science of the Total Environment* **2020**, 734, doi:10.1016/j.scitotenv.2020.139350.
2878. Weber, F.; Kerpen, J.; Wolff, S.; Langer, R.; Eschweiler, V. Investigation of Microplastics Contamination in Drinking Water of a German City. *Science of the Total Environment* **2021**, 755, doi:10.1016/j.scitotenv.2020.143421.
2879. Wen, L.; Shao, H. Analysis of Influencing Factors of the CO<sub>2</sub> Emissions in China: Nonparametric Additive Regression Approach. *Science of the Total Environment* **2019**, 694, doi:10.1016/j.scitotenv.2019.133724.
2880. Wilberforce, T.; Olabi, A.G.; Sayed, E.T.; Elsaid, K.; Abdelkareem, M.A. Progress in Carbon Capture Technologies. *Science of the Total Environment* **2021**, 761, doi:10.1016/j.scitotenv.2020.143203.
2881. Willison, S.A.; Daniel Stout, I.I.; Mysz, A.; Starr, J.; Tabor, D.; Wyrzykowska-Ceradini, B.; Nardin, J.; Morris, E.; Snyder, E.G. The Impact of Wipe Sampling Variables on Method Performance Associated with Indoor Pesticide Misuse and Highly Contaminated Areas. *Science of the Total Environment* **2019**, 655, 539–546, doi:10.1016/j.scitotenv.2018.11.128.
2882. Xia, P.; Wu, J.; Ji, X.; Xi, P. A DEA-Based Empirical Analysis for Dynamic Performance of China's Regional Coke Production Chain. *Science of the Total Environment* **2020**, 717, doi:10.1016/j.scitotenv.2020.136890.
2883. Xu, B.; Yi, Y. Use of Ladle Furnace Slag Containing Heavy Metals as a Binding Material in Civil Engineering. *Science of the Total Environment* **2020**, 705, doi:10.1016/j.scitotenv.2019.135854.
2884. Xu, J.; Yu, J.; He, W.; Huang, J.; Xu, J.; Li, G. Recovery of Carbon Black from Waste Tire in Continuous Commercial Rotary Kiln Pyrolysis Reactor. *Science of the Total*

- Environment* **2021**, 772, doi:10.1016/j.scitotenv.2021.145507.
2885. Xu, X.; Xu, P.; Zhu, J.; Li, H.; Xiong, Z. Bamboo Construction Materials: Carbon Storage and Potential to Reduce Associated CO<sub>2</sub> Emissions. *Science of the Total Environment* **2022**, 814, doi:10.1016/j.scitotenv.2021.152697.
  2886. Yang, X.; Zhou, X.; Kan, T.; Strezov, V.; Nelson, P.; Evans, T.; Jiang, Y. Characterization of Size Resolved Atmospheric Particles in the Vicinity of Iron and Steelmaking Industries in China. *Science of the Total Environment* **2019**, 694, doi:10.1016/j.scitotenv.2019.07.340.
  2887. Yao, D.; Liu, Y.; Xu, Z.; Zhu, Z.; Qi, J.; Wang, Y.; Cui, P. Comparative Water Footprint Assessment of Fuel Cell Electric Vehicles and Compressed Natural Gas Vehicles. *Science of the Total Environment* **2022**, 830, doi:10.1016/j.scitotenv.2022.154820.
  2888. Yi, Y.; Li, Q.; Zhang, K.; Li, R.; Yang, L.; Liu, Z.; Zhang, X.; Wang, S.; Wang, Y.; Chen, H.; et al. Highly Time-Resolved Measurements of Elements in PM<sub>2.5</sub> in Changzhou, China: Temporal Variation, Source Identification and Health Risks. *Science of the Total Environment* **2022**, 853, doi:10.1016/j.scitotenv.2022.158450.
  2889. Yu, Y.; Xu, H.; Cheng, J.; Wan, F.; Ju, L.; Liu, Q.; Liu, J. Which Type of Electric Vehicle Is Worth Promoting Mostly in the Context of Carbon Peaking and Carbon Neutrality? A Case Study for a Metropolis in China. *Science of the Total Environment* **2022**, 837, doi:10.1016/j.scitotenv.2022.155626.
  2890. Zeng, X.; Kong, S.; Zhang, Q.; Ren, H.; Liu, J.; Feng, Y.; Yan, Q.; Qin, S.; Zheng, S.; Yao, L.; et al. Source Profiles and Emission Factors of Organic and Inorganic Species in Fine Particles Emitted from the Ultra-Low Emission Power Plant and Typical Industries. *Science of the Total Environment* **2021**, 789, doi:10.1016/j.scitotenv.2021.147966.
  2891. Zhang, H.; Zuo, Q.; Wei, C.; Lin, X.; Dong, J.; Liao, C.; Xu, A. Closed-Circulating CO<sub>2</sub> Sequestration Process Evaluation Utilizing Wastes in Steelmaking Plant. *Science of the Total Environment* **2020**, 738, doi:10.1016/j.scitotenv.2020.139747.
  2892. Zhao, R.; Guan, Q.; Luo, H.; Lin, J.; Yang, L.; Wang, F.; Pan, N.; Yang, Y. Fuzzy Synthetic Evaluation and Health Risk Assessment Quantification of Heavy Metals in Zhangye Agricultural Soil from the Perspective of Sources. *Science of the Total Environment* **2019**, 697, doi:10.1016/j.scitotenv.2019.134126.
  2893. Zhu, C.; Chang, Y.; Su, S.; Li, X.; Zhang, Z. Development of Q-L-EIV Interactive Curves for Comparison of the Environmental Performance of Composite Slabs and RC Slabs from the Perspective of Mechanical Features. *Science of the Total Environment* **2019**, 683, 508–523, doi:10.1016/j.scitotenv.2019.05.234.
  2894. Zhu, C.; Tang, Z.; Li, Q.; Zhou, R.; Lv, J.; Zhang, W.; Zhan, K.; Li, X.; Zeng, X. Lead of Detection in Rhododendron Leaves Using Laser-Induced Breakdown Spectroscopy Assisted by Laser-Induced Fluorescence. *Science of the Total Environment* **2020**, 738, doi:10.1016/j.scitotenv.2020.139402.
  2895. Zhu, J.; Hsu, C.-Y.; Chou, W.-C.; Chen, M.-J.; Chen, J.-L.; Yang, T.-T.; Wu, Y.-S.; Chen, Y.-C. PM 2.5 - and PM 10 -Bound Polycyclic Aromatic Hydrocarbons

- (PAHs) in the Residential Area near Coal-Fired Power and Steelmaking Plants of Taichung City, Taiwan: In Vitro-Based Health Risk and Source Identification. *Science of the Total Environment* **2019**, *670*, 439–447, doi:10.1016/j.scitotenv.2019.03.198.
2896. Zhu, M.; Yuan, Y.; Yin, H.; Guo, Z.; Wei, X.; Qi, X.; Liu, H.; Dang, Z. Environmental Contamination and Human Exposure of Polychlorinated Biphenyls (PCBs) in China: A Review. *Science of the Total Environment* **2022**, *805*, doi:10.1016/j.scitotenv.2021.150270.
2897. Fiamonzini, L.A.; Rivas, G.A.R.; Ando Junior, O.H. Workbench for a Parabolic Trough Solar Collector with a Tracking System. *Scientific World Journal* **2022**, *2022*, doi:10.1155/2022/4505349.
2898. Khatri, S.B.; Newman, C.; Hammel, J.P.; Dey, T.; Van Laere, J.J.; Ross, K.A.; Rose, J.A.; Anderson, T.; Mukerjee, S.; Smith, L.; et al. Associations of Air Pollution and Pediatric Asthma in Cleveland, Ohio. *Scientific World Journal* **2021**, *2021*, doi:10.1155/2021/8881390.
2899. Shah, M.; Ayob, M.T.M.; Rosdan, R.; Yaakob, N.; Embong, Z.; Othman, N.K. The Effect of H<sub>2</sub>S Pressure on the Formation of Multiple Corrosion Products on 316L Stainless Steel Surface. *Scientific World Journal* **2020**, *2020*, doi:10.1155/2020/3989563.
2900. Jia, X.; Zhou, Y.; Yan, J.; Wei, Y. Sustainable Development of an Ecological-Economic System in the Taihu Lake City Cluster Based on Emergy Analysis. *Shengtai Xuebao* **2019**, *39*, 6487–6499, doi:10.5846/stxb201801050028.
2901. Shoujuan, T.; Lixiao, Z.; Yan, H.; Qiance, L.; Yupcng, L.; Ji, H. Dynamic Modeling of Stock and Flow in an Urban Residential Building System: A Case Study of Beijing. *Shengtai Xuebao* **2019**, *39*, 1240–1247, doi:10.5846/stxb201809131977.
2902. Yu, S.; Zhang, J.; Chen, H.; Zhang, B.; Hu, C.; Deng, H. Physiological Responses of *Vetiveria Zizanioides* to Cadmium Stress by Fourier Transform Infrared Spectroscopy. *Shengtai Xuebao* **2019**, *39*, 7267–7273, doi:10.5846/stxb201808191763.
2903. Qu, H.; Fu, Y.; Liu, J. Research on VOCs Treatment Technology of Oily Sewage Pool in Oil Field. *Shiyou Huagong Gaodeng Xuexiao Xuebao/Journal of Petrochemical Universities* **2021**, *34*, 84–90, doi:10.3969/j.issn.1006-396X.2021.04.014.
2904. Huang, J.; Yan, Z.; Li, D.; Tang, X.; Yao, X. In-Situ Experimental Study on Deformation Behaviors of Lining Structure for Shield Tunnels under High Internal Pressure. *Shuili Fadian Xuebao/Journal of Hydroelectric Engineering* **2021**, *40*, 165–172, doi:10.11660/slfdbx.20210316.
2905. Hübner, T.; von Roon, S. Synthetic Fuels in the German Industry Sector Depending on Climate Protection Level. *Smart Energy* **2021**, *3*, doi:10.1016/j.segy.2021.100042.
2906. Abedghars, M.T.; Ferdenache, H.; Ghera, M.; Bezzina, B.; Gasmi, F.Z.; Tairi, L.; Boukari, A. Synthesis and Characterization of a Protective Coating against Corrosion Based on Scale and Iron Pigment. *SN Applied Sciences* **2019**, *1*, doi:10.1007/s42452-019-1741-4.

2907. Alizadeh, M.; Alizadeh, M.; Adhami, S. The Role of Thermal Improvements in Indurating Machines for Pellet Production from High-Sulfur Magnetite Concentrate. *SN Applied Sciences* **2020**, *2*, doi:10.1007/s42452-020-03702-1.
2908. Ambadekar, P.K.; Choudhari, C.M. CNN Based Tool Monitoring System to Predict Life of Cutting Tool. *SN Applied Sciences* **2020**, *2*, doi:10.1007/s42452-020-2598-2.
2909. Chen, Z.; Tu, K.; Li, R.; Liu, J. Study on the Application Mechanism and Mechanics of Steel Slag in Composite Cementitious Materials. *SN Applied Sciences* **2020**, *2*, doi:10.1007/s42452-020-03644-8.
2910. Garcia Gonzalez, H.; García-Ordiales, E.; Diez, R.R. Analysis of the Airborne Mercury and Particulate Arsenic Levels Close to an Abandoned Waste Dump and Buildings of a Mercury Mine and the Potential Risk of Atmospheric Pollution. *SN Applied Sciences* **2022**, *4*, doi:10.1007/s42452-022-04964-7.
2911. Hammarberg, S.; Larsson, S.; Kajberg, J.; Jonsén, P. Numerical Evaluation of Lightweight Ultra High Strength Steel Sandwich for Energy Absorption. *SN Applied Sciences* **2020**, *2*, doi:10.1007/s42452-020-03724-9.
2912. Hattab, Y.; Benharrats, N. Electrical and Thermal Properties of PANI-Mmt Nanocomposites in Strongly Acidic Aqueous Media. *SN Applied Sciences* **2019**, *1*, doi:10.1007/s42452-019-0703-1.
2913. Hruzevych, A.V.; Derecha, D.O. Diffusion-Hardening Effect on the Technological Properties of High-Temperature Steel. *SN Applied Sciences* **2020**, *2*, doi:10.1007/s42452-020-2943-5.
2914. Kumar, M.H.; Mahanta, N.R.; Samantaray, S.; Kumar, N.M. Combined Effect of Waste Glass Powder and Recycled Steel Fibers on Mechanical Behavior of Concrete. *SN Applied Sciences* **2021**, *3*, doi:10.1007/s42452-021-04353-6.
2915. Maile, N.C.; Shinde, S.K.; Patil, K.S.; Fulari, A.V.; Shahzad, A.; Lee, D.S.; Fulari, V.J. Capacitive Property Studies of Inexpensive SILAR Synthesized Polyaniline Thin Films for Supercapacitor Application. *SN Applied Sciences* **2019**, *1*, doi:10.1007/s42452-019-1403-6.
2916. Martínez Herrero, E.; Pereda Pereda, L.; Huidobro Fernández, F.; Monje Pardo, J.C.; Urquidi Sandoval, B. An Environmental Evaluation of a Milling Machine Range: A Case Study on Reconfigurable Approach. *SN Applied Sciences* **2019**, *1*, doi:10.1007/s42452-019-1552-7.
2917. Mueller, E. The Long-Term Stability of Residual Stresses in Steel. *SN Applied Sciences* **2021**, *3*, doi:10.1007/s42452-021-04867-z.
2918. Paulson, B.M.; Joby Thomas, K.; Raphael, V.P.; Shaju, K.S.; Ragi, K. Mitigation of Concrete Reinforced Steel Corrosion by Penta Sodium Triphosphate: Physicochemical and Electrochemical Investigations. *SN Applied Sciences* **2020**, *2*, doi:10.1007/s42452-020-03586-1.
2919. Pourhashem, S.; Rashidi, A.; Alaei, M.; Moradi, M.-A.; Maklavany, D.M. Developing a New Method for Synthesizing Amine Functionalized G-C<sub>3</sub>N<sub>4</sub> Nanosheets for Application as Anti-Corrosion Nanofiller in Epoxy Coatings. *SN*

- Applied Sciences* **2019**, *1*, doi:10.1007/s42452-018-0123-7.
2920. Rewlay-ngoan, C.; Papong, S. Environmental Impact Assessment of a Rotary Compressor in Thailand Based on Life Cycle Assessment Methodology. *SN Applied Sciences* **2020**, *2*, doi:10.1007/s42452-020-03278-w.
2921. Suzuki, M.; Ukisu, Y.; Murayama, N. Lead Extraction as Metallic Phase from Waste Lead Oxide-Containing Glass by Redox Reaction in Hydrothermal Treatment. *SN Applied Sciences* **2021**, *3*, doi:10.1007/s42452-021-04429-3.
2922. Tanvir, F.; Sattar, T.; Mba, D.; Edwards, G. Identification of Fatigue Damage Evaluation Using Entropy of Acoustic Emission Waveform. *SN Applied Sciences* **2020**, *2*, doi:10.1007/s42452-019-1694-7.
2923. Tillmann, W.; Anar, N.B.; Wojarski, L. Mechanical Behavior of Reactive Air Brazed (RAB) Crofer 22 APU-Al<sub>2</sub>O<sub>3</sub> Joints at Ambient Temperature. *SN Applied Sciences* **2020**, *2*, doi:10.1007/s42452-020-2622-6.
2924. Ubale, S.B.; Ghogare, T.T.; Lokhande, V.C.; Ji, T.; Lokhande, C.D. Electrochemical Behavior of Hydrothermally Synthesized Porous Groundnuts-like Samarium Oxide Thin Films. *SN Applied Sciences* **2020**, *2*, doi:10.1007/s42452-020-2467-z.
2925. Wang, Y.; Jin, L.; Xue, T.; Shao, F.; Yao, Y.; Li, X. Mussel Inspired Durable PH-Responsive Mesh for High-Efficient Oil/Water Separation. *SN Applied Sciences* **2020**, *2*, doi:10.1007/s42452-020-03915-4.
2926. Xiao, J.; Sun, J.; Zhang, X.; Yue, Q. Mechanism of Underexcavation and Practical Design Method for Building Rectification. *SN Applied Sciences* **2022**, *4*, doi:10.1007/s42452-022-04993-2.
2927. Yeşiltepe, S.; Şeşen, M.K. High-Temperature Oxidation Kinetics of Cu Bearing Carbon Steel. *SN Applied Sciences* **2020**, *2*, doi:10.1007/s42452-020-2473-1.
2928. Chirkova, A.G.; Makhutov, N.A.; Kuzeev, I.R.; Gafarova, V.A. Calculation-Experimental Evaluation of Austenitic Steel Mechanical Properties Variation in Operation. *SOCAR Proceedings* **2019**, 67–72, doi:10.5510/OGP20190400413.
2929. Inubushi, K. Sustainable Soil Management in East, South and Southeast Asia. *Soil Science and Plant Nutrition* **2021**, *67*, 1–9, doi:10.1080/00380768.2020.1835431.
2930. Lamnatou, C.; Chemisana, D. Solar Thermal Systems for Sustainable Buildings and Climate Change Mitigation: Recycling, Storage and Avoided Environmental Impacts Based on Different Electricity Mixes. *Solar Energy* **2022**, *231*, 209–227, doi:10.1016/j.solener.2021.11.022.
2931. Ong, T.C.; Sarvghad, M.; Lippiatt, K.; Bell, S.; Will, G.; Steinberg, T.A. Investigation of the Corrosion of Electro-Less Nickel-Plated Alloys in Molten Salt and Its Effect on Phase Change Properties for Energy Storage Applications. *Solar Energy* **2022**, *236*, 512–521, doi:10.1016/j.solener.2022.03.030.
2932. Weber, R.E.; Mueller, C.; Reinhart, C. Solar Exoskeletons – An Integrated Building System Combining Solar Gain Control with Structural Efficiency. *Solar Energy* **2022**, *240*, 301–314, doi:10.1016/j.solener.2022.05.048.
2933. Yousef, M.S.; Hassan, H. Assessment of Different Passive Solar Stills via Exergoeconomic, Exergoenvironmental, and Exergoenvironmental Approaches:

- A Comparative Study. *Solar Energy* **2019**, *182*, 316–331, doi:10.1016/j.solener.2019.02.042.
2934. Atchuta, S.R.; Sakthivel, S.; Barshilia, H.C. Nickel Doped Cobaltite Spinel as a Solar Selective Absorber Coating for Efficient Photothermal Conversion with a Low Thermal Radiative Loss at High Operating Temperatures. *Solar Energy Materials and Solar Cells* **2019**, *200*, doi:10.1016/j.solmat.2019.109917.
2935. Chang, J.-Y.; Han, H.-S.; Wang, C.-Y.; Long, L.; Wang, L.; Sheremet, M.; Miroschnichenko, I.; Chen, Y.-B. Eco-Friendly and Scalable Radiative Cooling for Metal Substrates with Electrophoretically Deposited Chitosan. *Solar Energy Materials and Solar Cells* **2020**, *216*, doi:10.1016/j.solmat.2020.110707.
2936. Encinas-Sánchez, V.; de Miguel, M.T.; Lasanta, M.I.; García-Martín, G.; Pérez, F.J. Electrochemical Impedance Spectroscopy (EIS): An Efficient Technique for Monitoring Corrosion Processes in Molten Salt Environments in CSP Applications. *Solar Energy Materials and Solar Cells* **2019**, *191*, 157–163, doi:10.1016/j.solmat.2018.11.007.
2937. Fernández, A.G.; Cabeza, L.F. Corrosion Monitoring and Mitigation Techniques on Advanced Thermal Energy Storage Materials for CSP Plants. *Solar Energy Materials and Solar Cells* **2019**, *192*, 179–187, doi:10.1016/j.solmat.2018.12.028.
2938. Kondaiah, P.; Niranjana, K.; John, S.; Barshilia, H.C. Tantalum Carbide Based Spectrally Selective Coatings for Solar Thermal Absorber Applications. *Solar Energy Materials and Solar Cells* **2019**, *198*, 26–34, doi:10.1016/j.solmat.2019.04.016.
2939. Liu, L.; Zhang, H.; Cai, Y.; Li, Y.; Qin, J.; Yang, Z.; Wang, R.; Zhang, Y.; Sun, Z.; Xue, X.; et al. Super-Amphiphobic Coatings with Sub-Ambient Daytime Radiative Cooling—Part 2: Cooling Effect under Real Conditions. *Solar Energy Materials and Solar Cells* **2022**, *241*, doi:10.1016/j.solmat.2022.111736.
2940. Ma, S.; Qarony, W.; Hossain, M.I.; Yip, C.T.; Tsang, Y.H. Metal-Organic Framework Derived Porous Carbon of Light Trapping Structures for Efficient Solar Steam Generation. *Solar Energy Materials and Solar Cells* **2019**, *196*, 36–42, doi:10.1016/j.solmat.2019.02.035.
2941. Niranjana, K.; Soum-Glaude, A.; Carling-Plaza, A.; Bysakh, S.; John, S.; Barshilia, H.C. Extremely High Temperature Stable Nanometric Scale Multilayer Spectrally Selective Absorber Coating: Emissivity Measurements at Elevated Temperatures and a Comprehensive Study on Ageing Mechanism. *Solar Energy Materials and Solar Cells* **2021**, *221*, doi:10.1016/j.solmat.2020.110905.
2942. Pineda, F.; Mallco, A.; De Barbieri, F.; Carrasco, C.; Henriquez, M.; Fuentealba, E.; Fernández, Á.G. Corrosion Evaluation by Electrochemical Real-Time Tracking of VM12 Martensitic Steel in a Ternary Molten Salt Mixture with Lithium Nitrates for CSP Plants. *Solar Energy Materials and Solar Cells* **2021**, *231*, doi:10.1016/j.solmat.2021.111302.
2943. Trevisan, S.; Wang, W.; Laumert, B. A High-Temperature Thermal Stability and Optical Property Study of Inorganic Coatings on Ceramic Particles for Potential Thermal Energy Storage Applications. *Solar Energy Materials and Solar Cells* **2022**,



- 239, doi:10.1016/j.solmat.2022.111679.
2944. Trevisan, S.; Wang, W.; Zhao, X.; Laumert, B. A Study of Metallic Coatings on Ceramic Particles for Thermal Emissivity Control and Effective Thermal Conductivity Enhancement in Packed Bed Thermal Energy Storage. *Solar Energy Materials and Solar Cells* **2022**, *234*, doi:10.1016/j.solmat.2021.111458.
  2945. Underwood, R.; Kim, M.; Drury, S.; Zhang, Y.; Wang, L.; Chan, C.; Hallam, B. Abundant Material Consumption Based on a Learning Curve for Photovoltaic toward Net-Zero Emissions by 2050. *Solar RRL* **2022**, doi:10.1002/solr.202200705.
  2946. Pearce, J.; Raza, S.; Baublys, K.; Hayes, P.; Firouzi, M.; Rudolph, V. Unconventional CO<sub>2</sub> Storage: CO<sub>2</sub> Mineral Trapping Predicted in Characterized Shales, Sandstones, and Coal Seam Interburden. *SPE Journal* **2022**, *27*, 3218–3239, doi:10.2118/209791-PA.
  2947. Li, R.; Lei, S.; Li, W. Fabrication of Superhydrophobic/Superoleophilic Steel Mesh and Its Oil-Water Separation Performance. *Speciality Petrochemicals* **2022**, *39*, 59–63.
  2948. Ma, L.; Xu, J.; Xu, F.; Xiang, X.; Jian, C.; Yang, J.; Deng, W. Research and Application of Plug-Removal and Injection-Increasing Fluid System for Transfer Wells in W Oilfield. *Speciality Petrochemicals* **2021**, *38*, 23–27.
  2949. Ma, Y.; Liu, S.; Jiang, J.; Gu, Z.; Bai, H. Study on Influencing Factors and Mechanism of Oil Well Tubing Corrosion in North Shaanxi. *Speciality Petrochemicals* **2020**, *37*, 51–55.
  2950. Abed, J.; Rayburg, S.; Rodwell, J.; Neave, M. A Review of the Performance and Benefits of Mass Timber as an Alternative to Concrete and Steel for Improving the Sustainability of Structures. *Sustainability (Switzerland)* **2022**, *14*, doi:10.3390/su14095570.
  2951. Abouhamad, M.; Abu-Hamd, M. Life Cycle Environmental Assessment of Light Steel Framed Buildings with Cement-Based Walls and Floors. *Sustainability (Switzerland)* **2020**, *12*, 1–17, doi:10.3390/su122410686.
  2952. Abouhamad, M.; Abu-Hamd, M. Life Cycle Assessment Framework for Embodied Environmental Impacts of Building Construction Systems. *Sustainability (Switzerland)* **2021**, *13*, 1–21, doi:10.3390/su13020461.
  2953. Agudelo, G.; Palacio, C.; Monteiro, S.; Colorado, H. Foundry Sand Waste and Residual Aggregate Evaluated as Pozzolans for Concrete. *Sustainability (Switzerland)* **2022**, *14*, doi:10.3390/su14159055.
  2954. Akhyar; Tamlicha, A.; Farhan, A.; Azwinur; Syukran; Fadhilah, T.A.; Firsia, T.; Ghazilla, R.A.R. Evaluation Of Welding Distortion and Hardness in the A36 Steel Plate Joints Using Different Cooling Media. *Sustainability (Switzerland)* **2022**, *14*, doi:10.3390/su14031405.
  2955. Al-Nuaimi, S.; Banawi, A.A.; Al-Ghamdi, S.G. Environmental and Economic Life Cycle Analysis of Primary Construction Materials Sourcing under Geopolitical Uncertainties: A Case Study of Qatar. *Sustainability (Switzerland)* **2019**, *11*, doi:10.3390/su11216000.

2956. Al-Obaidy, M.; Courard, L.; Attia, S. A Parametric Approach to Optimizing Building Construction Systems and Carbon Footprint: A Case Study Inspired by Circularity Principles. *Sustainability (Switzerland)* **2022**, *14*, doi:10.3390/su14063370.
2957. Al-Shaiba, A.S.; Al-Ghamdi, S.G.; Koc, M. Comparative Review and Analysis of Organizational (In)Efficiency Indicators in Qatar. *Sustainability (Switzerland)* **2019**, *11*, doi:10.3390/su11236566.
2958. Allan, K.; Phillips, A.R. Comparative Cradle-to-Grave Life Cycle Assessment of Low and Mid-Rise Mass Timber Buildings with Equivalent Structural Steel Alternatives. *Sustainability (Switzerland)* **2021**, *13*, doi:10.3390/su13063401.
2959. Alzard, M.H.; El-hassan, H.; El-maaddawy, T. Environmental and Economic Life Cycle Assessment of Recycled Aggregates Concrete in the United Arab Emirates. *Sustainability (Switzerland)* **2021**, *13*, doi:10.3390/su131810348.
2960. Arama, Z.A.; Kayabekir, A.E.; Bekdaş, G.; Geem, Z.W. CO2 and Cost Optimization of Reinforced Concrete Cantilever Soldier Piles: A Parametric Study with Harmony Search Algorithm. *Sustainability (Switzerland)* **2020**, *12*, doi:10.3390/SU12155906.
2961. Azadi, M.; Edraki, M.; Farhang, F.; Ahn, J. Opportunities for Mineral Carbonation in Australia's Mining Industry. *Sustainability (Switzerland)* **2019**, *11*, doi:10.3390/su11051250.
2962. Backes, J.G.; Suer, J.; Pauliks, N.; Neugebauer, S.; Traverso, M. Life Cycle Assessment of an Integrated Steel Mill Using Primary Manufacturing Data: Actual Environmental Profile. *Sustainability (Switzerland)* **2021**, *13*, doi:10.3390/su13063443.
2963. Bakalár, T.; Pavolová, H.; Šimková, Z.; Bednárová, L. Phosphorus Management in Slovakia—A Case Study. *Sustainability (Switzerland)* **2022**, *14*, doi:10.3390/su141610374.
2964. Baldo, N.; Rondinella, F.; Daneluz, F.; Pasetto, M. Foamed Bitumen Mixtures for Road Construction Made with 100% Waste Materials: A Laboratory Study. *Sustainability (Switzerland)* **2022**, *14*, doi:10.3390/su14106056.
2965. Bansal, T.; Talakokula, V.; Rama Jyosyula, S.K.; Vicente, R.; Ascensão, G. Embedded Piezo-Sensor-Based Automatic Performance Monitoring of Chloride-Induced Corrosion in Alkali-Activated Concrete. *Sustainability (Switzerland)* **2022**, *14*, doi:10.3390/su141912917.
2966. Bautista, B.E.; Ongpeng, J.M.C.; Razon, L.F. LCA of Mortar with Calcined Clay and Limestone Filler in RC Column Retrofit. *Sustainability (Switzerland)* **2022**, *14*, doi:10.3390/su14031175.
2967. Bell, M.; Fick, D.; Ament, R.; Lister, N.-M. The Use of Fiber-Reinforced Polymers in Wildlife Crossing Infrastructure. *Sustainability (Switzerland)* **2020**, *12*, doi:10.3390/su12041557.
2968. Białko, M.; Hoła, B. Identification of Methods of Reducing Construction Waste in Construction Enterprises Based on Surveys. *Sustainability (Switzerland)* **2021**, *13*, doi:10.3390/su13179888.

2969. Bianchi, P.F.; Yepes, V.; Vitorio, P.C., Jr.; Kripka, M. Study of Alternatives for the Design of Sustainable Low-Income Housing in Brazil. *Sustainability (Switzerland)* **2021**, *13*, doi:10.3390/su13094757.
2970. Boenzi, F.; Ordieres-Meré, J.; Iavagnilio, R. Life Cycle Assessment Comparison of Two Refractory Brick Product Systems for Ladle Lining in Secondary Steelmaking. *Sustainability (Switzerland)* **2019**, *11*, doi:10.3390/su11051295.
2971. Bradshaw, J.; Singh, S.J.; Tan, S.-Y.; Fishman, T.; Pott, K. Gis-Based Material Stock Analysis (MSA) of Climate Vulnerabilities to the Tourism Industry in Antigua and Barbuda. *Sustainability (Switzerland)* **2020**, *12*, 1–22, doi:10.3390/su12198090.
2972. Branca, T.; Fornai, B.; Colla, V.; Pistelli, M.; Faraci, E.; Cirilli, F.; Schroder, A. Industrial Symbiosis and Energy Efficiency in European Process Industries: A Review. *Sustainability (Switzerland)* **2021**, *13*, doi:10.3390/su13169159.
2973. Bruun, N.; Lehmusto, J.; Hemming, J.; Tesfaye, F.; Hupa, L. Metal Rod Surfaces after Exposure to Used Cooking Oils. *Sustainability (Switzerland)* **2022**, *14*, doi:10.3390/su14010355.
2974. Cai, G.; Xiong, F.; Xu, Y.; Larbi, A.S.; Lu, Y.; Yoshizawa, M. A Demountable Connection for Low-Rise Precast Concrete Structures with DfD for Construction Sustainability-A Preliminary Test under Cyclic Loads. *Sustainability (Switzerland)* **2019**, *11*, doi:10.3390/su11133696.
2975. Cai, S.; Liu, B.; Li, J.; Zhang, Y.; Zeng, Y.; Wang, Y.; Liu, T. Biochemical Analysis and Toxicity Assessment of Utilization of Argon Oxygen Decarbonization Slag as a Mineral Fertilizer for Tall Fescue (*Festuca Arundinacea* Schreb) Planting. *Sustainability (Switzerland)* **2022**, *14*, doi:10.3390/su14159286.
2976. Cakiroglu, C.; Islam, K.; Bekdaş, G.; Billah, M. CO<sub>2</sub> Emission and Cost Optimization of Concrete-Filled Steel Tubular (Cfst) Columns Using Metaheuristic Algorithms. *Sustainability (Switzerland)* **2021**, *13*, doi:10.3390/su13148092.
2977. Cakiroglu, C.; Islam, K.; Bekdaş, G.; Kim, S.; Geem, Z.W. CO<sub>2</sub> Emission Optimization of Concrete-Filled Steel Tubular Rectangular Stub Columns Using Metaheuristic Algorithms. *Sustainability (Switzerland)* **2021**, *13*, doi:10.3390/su131910981.
2978. Campaña, C.; Fonseca, D.; Amo, D.; Martí, N.; Peña, E. Mixed Analysis of the Flipped Classroom in the Concrete and Steel Structures Subject in the Context of Covid-19 Crisis Outbreak. A Pilot Study. *Sustainability (Switzerland)* **2021**, *13*, doi:10.3390/su13115826.
2979. Castro-León, G.; Baquero-Quinteros, E.; Loor, B.G.; Alvear, J.; Montesdeoca Espín, D.E.; Rosa, A.D.L.; Montero-Calderón, C. Waste to Catalyst: Synthesis of Catalysts from Sewage Sludge of the Mining, Steel, and Petroleum Industries. *Sustainability (Switzerland)* **2020**, *12*, 1–16, doi:10.3390/su12239849.
2980. Cayumil, R.; Khanna, R.; Konyukhov, Y.; Burmistrov, I.; Kargin, J.B.; Mukherjee, P.S. An Overview on Solid Waste Generation and Management: Current Status in Chile. *Sustainability (Switzerland)* **2021**, *13*, doi:10.3390/su132111644.

2981. Çelik, A.İ.; Özkılıç, Y.O.; Zeybek, Ö.; Özdöner, N.; Tayeh, B.A. Performance Assessment of Fiber-Reinforced Concrete Produced with Waste Lathe Fibers. *Sustainability (Switzerland)* **2022**, *14*, doi:10.3390/su141911817.
2982. Charef, R.; Morel, J.; Rakhshan, K. Barriers to Implementing the Circular Economy in the Construction Industry: A Critical Review. *Sustainability (Switzerland)* **2021**, *13*, doi:10.3390/su132312989.
2983. Chen, C.X.; Pierobon, F.; Jones, S.; Maples, I.; Gong, Y.; Ganguly, I. Comparative Life Cycle Assessment of Mass Timber and Concrete Residential Buildings: A Case Study in China. *Sustainability (Switzerland)* **2022**, *14*, doi:10.3390/su14010144.
2984. Chen, X.; Mao, J.; Tian, H. Analysis of China's Iron Trade Flow: Quantity, Value and Regional Pattern. *Sustainability (Switzerland)* **2020**, *12*, doi:10.3390/su122410427.
2985. Chen, Y.; Fan, X.; Zhou, Q. An Inverted-u Impact of Environmental Regulations on Carbon Emissions in China's Iron and Steel Industry: Mechanisms of Synergy and Innovation Effects. *Sustainability (Switzerland)* **2020**, *12*, doi:10.3390/su12031038.
2986. Chen, Y.-L.; Lin, C.-T. Recycling of Basic Oxygen Furnace Slag as a Raw Material for Autoclaved Aerated Concrete Production. *Sustainability (Switzerland)* **2020**, *12*, doi:10.3390/SU12155896.
2987. Choi, I.; Kim, J.; Kim, D. LCA-Based Investigation of Environmental Impacts for Novel Double-Beam Floor System Subjected to High Gravity Loads. *Sustainability (Switzerland)* **2020**, *12*, doi:10.3390/su12219193.
2988. Crisman, B.; Ossich, G.; De Lorenzi, L.; Bevilacqua, P.; Roberti, R. A Laboratory Assessment of the Influence of Crumb Rubber in Hot Mix Asphalt with Recycled Steel Slag. *Sustainability (Switzerland)* **2020**, *12*, 1–21, doi:10.3390/su12198045.
2989. Cristelo, N.; Castro, F.; Miranda, T.; Abdollahnejad, Z.; Fernández-Jiménez, A. Iron and Aluminium Production Wastes as Exclusive Components of Alkali Activated Binders—towards a Sustainable Alternative. *Sustainability (Switzerland)* **2021**, *13*, doi:10.3390/su13179938.
2990. Dadkhah, M.; Tulliani, J.-M. Damage Management of Concrete Structures with Engineered Cementitious Materials and Natural Fibers: A Review of Potential Uses. *Sustainability (Switzerland)* **2022**, *14*, doi:10.3390/su14073917.
2991. Dai, T.; Shan, S. Path Analysis of Beijing's Dematerialization Development Based on System Dynamics. *Sustainability (Switzerland)* **2020**, *12*, doi:10.3390/su12030829.
2992. Del Pero, F.; Delogu, M.; Kerschbaum, M. Design of a Lightweight Rear Crash Management System in a Sustainable Perspective. *Sustainability (Switzerland)* **2020**, *12*, doi:10.3390/su12135243.
2993. Díaz-Ramírez, M.C.; Ferreira, V.J.; García-Armingol, T.; López-Sabirón, A.M.; Ferreira, G. Battery Manufacturing Resource Assessment to Minimise Component Production Environmental Impacts. *Sustainability (Switzerland)* **2020**, *12*, doi:10.3390/SU12176840.
2994. Díaz-Ramírez, M.C.; Ferreira, V.J.; García-Armingol, T.; López-Sabirón, A.M.;

- Ferreira, G. Environmental Assessment of Electrochemical Energy Storage Device Manufacturing to Identify Drivers for Attaining Goals of Sustainable Materials 4.0. *Sustainability (Switzerland)* **2020**, *12*, doi:10.3390/su12010342.
2995. Dierks, C.; Hagedorn, T.; Campitelli, A.; Bulach, W.; Zeller, V. Are LCA Studies on Bulk Mineral Waste Management Suitable for Decision Support? A Critical Review. *Sustainability (Switzerland)* **2021**, *13*, doi:10.3390/su13094686.
2996. Diotti, A.; Cominoli, L.; Galvin, A.P.; Sorlini, S.; Plizzari, G. Sustainable Recycling of Electric Arc Furnace Steel Slag as Aggregate in Concrete: Effects on the Environmental and Technical Performance. *Sustainability (Switzerland)* **2021**, *13*, 1–13, doi:10.3390/su13020521.
2997. Domaracka, L.; Matuskova, S.; Tausova, M.; Senova, A.; Kowal, B. Efficient Use of Critical Raw Materials for Optimal Resource Management in EU Countries. *Sustainability (Switzerland)* **2022**, *14*, doi:10.3390/su14116554.
2998. El-Hassan, H.; Medlji, J.; El-Maaddawy, T. Properties of Steel Fiber-Reinforced Alkali-Activated Slag Concrete Made with Recycled Concrete Aggregates and Dune Sand. *Sustainability (Switzerland)* **2021**, *13*, doi:10.3390/su13148017.
2999. Falsafi, M.; Fornasiero, R. Explorative Multiple-Case Research on the Scrap-Based Steel Slag Value Chain: Opportunities for Circular Economy. *Sustainability (Switzerland)* **2022**, *14*, doi:10.3390/su14042284.
3000. Felmer, G.; Morales-Vera, R.; Astroza, R.; González, I.; Puettmann, M.; Wishnie, M. A Lifecycle Assessment of a Low-Energy Mass-Timber Building and Mainstream Concrete Alternative in Central Chile. *Sustainability (Switzerland)* **2022**, *14*, doi:10.3390/su14031249.
3001. Fernandez, E.; Edeleva, M.; Fiorio, R.; Cardon, L.; D'Hooge, D.R. Increasing the Sustainability of the Hybrid Mold Technique through Combined Insert Polymeric Material and Additive Manufacturing Method Design. *Sustainability (Switzerland)* **2022**, *14*, doi:10.3390/su14020877.
3002. Ferreira, F.P.V.; Tsavdaridis, K.D.; Martins, C.H.; De Nardin, S. Steel-Concrete-Composite Beams with Precast Hollow-Core Slabs: A Sustainable Solution. *Sustainability (Switzerland)* **2021**, *13*, doi:10.3390/su13084230.
3003. Gao, B.; Yang, C.; Zou, Y.; Wang, F.; Zhou, X.; Barbieri, D.M.; Wu, S. Compaction Procedures and Associated Environmental Impacts Analysis for Application of Steel Slag in Road Base Layer. *Sustainability (Switzerland)* **2021**, *13*, doi:10.3390/su13084396.
3004. Gao, X.; Duan, G.; Lan, C. Bayesian Updates for an Extreme Value Distribution Model of Bridge Traffic Load Effect Based on Shm Data. *Sustainability (Switzerland)* **2021**, *13*, doi:10.3390/su13158631.
3005. Gopika, M.; Ganesan, N.; Indira, P.V.; Kumar, V.S.; Murali, G.; Vatin, N.I. Influence of Steel Fibers on the Interfacial Shear Strength of Ternary Blend Geopolymer Concrete Composite. *Sustainability (Switzerland)* **2022**, *14*, doi:10.3390/su14137724.
3006. Gouveia, J.; Pinto, S.; Campos, S.; Matos, J.; Costa, C.; Dutra, T.; Esteves, S.;

- Oliveira, L. Life Cycle Assessment of a Circularity Case Study Using Additive Manufacturing. *Sustainability (Switzerland)* **2022**, *14*, doi:10.3390/su14159557.
3007. Graedel, T.; Miatto, A. Alloy Profusion, Spice Metals, and Resource Loss by Design. *Sustainability (Switzerland)* **2022**, *14*, doi:10.3390/su14137535.
3008. Gunes, B.; Ilki, A.; Ozturun, N.K. Determination of Monitoring Parameters for Fatigue Behavior of Steel-Concrete Composite Bridge Girders with Welded Full Depth Transverse Stiffeners. *Sustainability (Switzerland)* **2020**, *12*, 1–23, doi:10.3390/su12010283.
3009. Hedberg, J.; Fransson, K.; Prideaux, S.; Roos, S.; Jönsson, C.; Wallinder, I.O. Improving the Life Cycle Impact Assessment of Metal Ecotoxicity: Importance of Chromium Speciation, Water Chemistry, and Metal Release. *Sustainability (Switzerland)* **2019**, *11*, doi:10.3390/su11061655.
3010. Hidri, L.; Alqahtani, A.; Gazdar, A.; Youssef, B.B. Green Scheduling of Identical Parallel Machines with Release Date, Delivery Time and No-Idle Machine Constraints. *Sustainability (Switzerland)* **2021**, *13*, doi:10.3390/su13169277.
3011. Hsu, W.-L.; Liu, C.-C.; Shiau, Y.-C.; Lin, W.-C. Discussion on the Reinforcement of Reinforced Concrete Slab Structures. *Sustainability (Switzerland)* **2019**, *11*, doi:10.3390/su11061756.
3012. Hu, M.; Efram, N.W. The Status of Embodied Carbon in Building Practice and Research in the United States: A Systematic Investigation. *Sustainability (Switzerland)* **2021**, *13*, doi:10.3390/su132312961.
3013. Hu, Y.; Gallant, R.; Salaudeen, S.; Farooque, A.A.; He, S. Hydrothermal Carbonization of Spent Coffee Grounds for Producing Solid Fuel. *Sustainability (Switzerland)* **2022**, *14*, doi:10.3390/su14148818.
3014. Huan, J.; Han, L. Potential Contribution to Carbon Neutrality Strategy from Industrial Symbiosis: Evidence from a Local Coal-Aluminum-Electricity-Steel Industrial System. *Sustainability (Switzerland)* **2022**, *14*, doi:10.3390/su14052487.
3015. Ichisugi, Y.; Masui, T.; Karkour, S.; Itsubo, N. Projection of National Carbon Footprint in Japan with Integration of Lca and Iams. *Sustainability (Switzerland)* **2019**, *11*, 1–21, doi:10.3390/SU11236875.
3016. Iluțiu-Varvara, D.-A.; Aciu, C. Metallurgical Wastes as Resources for Sustainability of the Steel Industry. *Sustainability (Switzerland)* **2022**, *14*, doi:10.3390/su14095488.
3017. Irshad, H.M.; Toor, I.U.; Badr, H.M.; Samad, M.A. Evaluating the Flow Accelerated Corrosion and Erosion–Corrosion Behavior of a Pipeline Grade Carbon Steel (AISI 1030) for Sustainable Operations. *Sustainability (Switzerland)* **2022**, *14*, doi:10.3390/su14084819.
3018. Jankovic, L.; Carta, S. Biozero—Designing Nature-Inspired Net-Zero Building. *Sustainability (Switzerland)* **2021**, *13*, doi:10.3390/su13147658.
3019. Jayasinghe, L.; Waldmann, D. Development of a BIM-Based Web Tool as a Material and Component Bank for a Sustainable Construction Industry. *Sustainability (Switzerland)* **2020**, *12*, doi:10.3390/su12051766.

3020. Jena, T.; Kaewunruen, S. Life Cycle Sustainability Assessments of an Innovative Frp Composite Footbridge. *Sustainability (Switzerland)* **2021**, *13*, doi:10.3390/su132313000.
3021. Josa, I.; de la Fuente, A.; Casanovas-Rubio, M.M.; Armengou, J.; Aguado, A. Sustainability-Oriented Model to Decide on Concrete Pipeline Reinforcement. *Sustainability (Switzerland)* **2021**, *13*, doi:10.3390/su13063026.
3022. Josa, I.; Tošić, N.; Marinkovic, S.; De La Fuente, A.; Aguado, A. Sustainability-Oriented Multi-Criteria Analysis of Different Continuous Flight Auger Piles. *Sustainability (Switzerland)* **2021**, *13*, doi:10.3390/su13147552.
3023. Kachouh, N.; El-Maaddawy, T.; El-Hassan, H.; El-Ariss, B. Shear Response of Recycled Aggregates Concrete Deep Beams Containing Steel Fibers and Web Openings. *Sustainability (Switzerland)* **2022**, *14*, doi:10.3390/su14020945.
3024. Kaewunruen, S.; Peng, S.; Phil-Ebosie, O. Digital Twin Aided Sustainability and Vulnerability Audit for Subway Stations. *Sustainability (Switzerland)* **2020**, *12*, doi:10.3390/SU12197873.
3025. Kaizuka, J. Even Electric Trains Use Coal: Fixed and Relative Costs, Hidden Factors and Income Inequality in HSR Projects with Reference to Vietnam's North-South Express Railway. *Sustainability (Switzerland)* **2021**, *13*, doi:10.3390/su132413563.
3026. Kang, S.; Hong, Y.-J.; Kim, S.-D.; Jeon, E.-C. Ammonia Emission Factors and Uncertainties of Coke Oven Gases in Iron and Steel Industries. *Sustainability (Switzerland)* **2020**, *12*, doi:10.3390/SU12093518.
3027. Karalar, M.; Özkılıç, Y.O.; Deifalla, A.F.; Aksoylu, C.; Arslan, M.H.; Ahmad, M.; Sabri, M.M.S. Improvement in Bending Performance of Reinforced Concrete Beams Produced with Waste Lathe Scraps. *Sustainability (Switzerland)* **2022**, *14*, doi:10.3390/su141912660.
3028. Karim, M.; Tariq, J.; Morshed, S.; Shawon, S.; Hasan, A.; Prakash, C.; Singh, S.; Kumar, R.; Nirsanametla, Y.; Pruncu, C. Environmental, Economical and Technological Analysis of MQL-Assisted Machining of Al-Mg-Zr Alloy Using PCD Tool. *Sustainability (Switzerland)* **2021**, *13*, doi:10.3390/su13137321.
3029. Kawajiri, K.; Kishita, Y.; Shinohara, Y. Life Cycle Assessment of Thermoelectric Generators (TEGs) in an Automobile Application. *Sustainability (Switzerland)* **2021**, *13*, doi:10.3390/su132413630.
3030. Kerr, J.; Rayburg, S.; Neave, M.; Rodwell, J. Comparative Analysis of the Global Warming Potential (GWP) of Structural Stone, Concrete and Steel Construction Materials. *Sustainability (Switzerland)* **2022**, *14*, doi:10.3390/su14159019.
3031. Kim, K.; Park, Y. Development of Design Considerations as a Sustainability Approach for Military Protective Structures: A Case Study of Artillery Fighting Position in South Korea. *Sustainability (Switzerland)* **2020**, *12*, doi:10.3390/su12166479.
3032. Kim, S.; Kim, S. Framework for Designing Sustainable Structures through Steel Beam Reuse. *Sustainability (Switzerland)* **2020**, *12*, doi:10.3390/su12229494.

3033. Ko, M.-S.; Chang, T.-B.; Lee, C.-Y.; Huang, J.-W.; Lim, C.-F. Optimization of Cyclone-Type Rotary Kiln Reactor for Carbonation of Bof Slag. *Sustainability (Switzerland)* **2021**, *13*, doi:10.3390/su132011556.
3034. Kolotyryn, K.P.; Bogatyrev, S.A.; Kostyukhin, Y.Yu.; Savon, D.Yu.; Shinkevich, A.I. Justification of the Application of Resource-Saving Technology for the Restoration of Metal-Intensive Rear Semi-Axles of Trucks Using Hot Plastic Deformation. *Sustainability (Switzerland)* **2022**, *14*, doi:10.3390/su14010016.
3035. Kubjatko, T.; Micieta, B.; Cillikova, M.; Neslusan, M.; Micietova, A. Barkhausen Noise as a Reliable Tool for Sustainable Automotive Production. *Sustainability (Switzerland)* **2022**, *14*, doi:10.3390/su14074123.
3036. Kühmaier, M.; Kral, I.; Kanzian, C. Greenhouse Gas Emissions of the Forest Supply Chain in Austria in the Year 2018. *Sustainability (Switzerland)* **2022**, *14*, doi:10.3390/su14020792.
3037. Lastra-González, P.; Indacoechea-Vega, I.; Calzada-Pérez, M.A.; Castro-Fresno, D. Recyclability Potential of Induction-Healable Porous Asphalt Mixtures. *Sustainability (Switzerland)* **2020**, *12*, 1–11, doi:10.3390/su12239962.
3038. Lederer, J.; Gassner, A.; Keringer, F.; Mollay, U.; Schremmer, C.; Fellner, J. Material Flows and Stocks in the Urban Building Sector: A Case Study from Vienna for the Years 1990-2015. *Sustainability (Switzerland)* **2020**, *12*, doi:10.3390/SU12010300.
3039. Lee, M.-Y.; Kang, J.-H.; Hwang, D.-G.; Yoon, Y.-S.; Yoo, M.-S.; Jeon, T.-W. Environmental Assessment of Recycling (EAoR) for Safe Recycling of Steelmaking Slag in the Republic of Korea: Applications, Leaching Test, and Toxicity. *Sustainability (Switzerland)* **2021**, *13*, doi:10.3390/su13168805.
3040. Lee, W.-H.; Cheng, T.-W.; Lin, K.-Y.; Lin, K.-L.; Wu, C.-C.; Tsai, C.-T. Geopolymer Technologies for Stabilization of Basic Oxygen Furnace Slags and Sustainable Application as Construction Materials. *Sustainability (Switzerland)* **2020**, *12*, doi:10.3390/su12125002.
3041. Lermen, R.T.; Prauchner, M.B.; de Almeida Silva, R.; Bonsembiante, F.T. Using Wastes from the Process of Blasting with Steel Shot to Make a Radiation Shield in Mortar. *Sustainability (Switzerland)* **2020**, *12*, doi:10.3390/su12166674.
3042. Lesic, V.; Hodgett, R.E.; Pearman, A.; Peace, A. How to Improve Impact Reporting for Sustainability. *Sustainability (Switzerland)* **2019**, *11*, doi:10.3390/su11061718.
3043. Li, D.; Kaewunruen, S.; You, R. Remaining Fatigue Life Predictions of Railway Prestressed Concrete Sleepers Considering Time-Dependent Surface Abrasion. *Sustainability (Switzerland)* **2022**, *14*, doi:10.3390/su141811237.
3044. Li, H.; Tan, X.; Guo, J.; Zhu, K.; Huang, C. Study on an Implementation Scheme of Synergistic Emission Reduction of CO<sub>2</sub> and Air Pollutants in China's Steel Industry. *Sustainability (Switzerland)* **2019**, *11*, doi:10.3390/su11020352.
3045. Li, J.; Guo, H.; Zhou, Q.; Yang, B. Vehicle Routing and Scheduling Optimization of Ship Steel Distribution Center under Green Shipbuilding Mode. *Sustainability (Switzerland)* **2019**, *11*, doi:10.3390/su11154248.



3046. Li, S.; Yan, J.; Pei, Q.; Sha, J.; Mou, S.; Xiao, Y. Risk Identification and Evaluation of the Long-Term Supply of Manganese Mines in China Based on the VW-BGR Method. *Sustainability (Switzerland)* **2019**, *11*, doi:10.3390/su11092683.
3047. Li, S.; Zhang, H.; Nie, J.; Dewil, R.; Baeyens, J.; Deng, Y. The Direct Reduction of Iron Ore with Hydrogen. *Sustainability (Switzerland)* **2021**, *13*, doi:10.3390/su13168866.
3048. Li, T.; Wang, G.; Zhou, H.; Ning, X.; Zhang, C. Numerical Simulation Study on the Effects of Co-Injection of Pulverized Coal and Hydrochar into the Blast Furnace. *Sustainability (Switzerland)* **2022**, *14*, doi:10.3390/su14084407.
3049. Li, Y.; Fujikawa, K.; Wang, J.; Li, X.; Ju, Y.; Chen, C. The Potential and Trend of End-of-Life Passenger Vehicles Recycling in China. *Sustainability (Switzerland)* **2020**, *12*, doi:10.3390/su12041455.
3050. Li, Y.-F.; Lai, J.-Y.; Yu, C.-C. The Push-over Test and Numerical Analysis Study on the Mechanical Behavior of the GFRP Frame for Sustainable Prefabricated Houses. *Sustainability (Switzerland)* **2019**, *11*, doi:10.3390/su11236753.
3051. Li, Y.; Li, J.; Ramanathan, G.; Chang, S.; Shen, M.; Tsai, Y.; Huang, C. An Experimental Study on Mechanical Behaviors of Carbon Fiber and Microwave-Assisted Pyrolysis Recycled Carbon Fiber-Reinforced Concrete. *Sustainability (Switzerland)* **2021**, *13*, doi:10.3390/su13126829.
3052. Li, Z.-J.; Adamu, K.; Yan, K.; Xu, X.-L.; Shao, P.; Li, X.-H.; Bashir, H.M. Detection of Nut-Bolt Loss in Steel Bridges Using Deep Learning Techniques. *Sustainability (Switzerland)* **2022**, *14*, doi:10.3390/su141710837.
3053. Liu, H.; Zhu, B.; Wei, H.; Chai, C.; Chen, Y. Laboratory Evaluation on the Performance of Porous Asphalt Mixture with Steel Slag for Seasonal Frozen Regions. *Sustainability (Switzerland)* **2019**, *11*, doi:10.3390/su11246924.
3054. Loureiro, C.D.A.; Moura, C.F.N.; Rodrigues, M.; Martinho, F.C.G.; Silva, H.M.R.D.; Oliveira, J.R.M. Steel Slag and Recycled Concrete Aggregates: Replacing Quarries to Supply Sustainable Materials for the Asphalt Paving Industry. *Sustainability (Switzerland)* **2022**, *14*, doi:10.3390/su14095022.
3055. Lu, Y.; Yang, H.; Karasev, A.V.; Wang, C.; Jönsson, P.G. Applications of Hydrochar and Charcoal in the Iron and Steelmaking Industry—Part 1: Characterization of Carbonaceous Materials. *Sustainability (Switzerland)* **2022**, *14*, doi:10.3390/su14159488.
3056. Lu, Y.-C.; Brabie, L.; Karasev, A.V.; Wang, C. Applications of Hydrochar and Charcoal in the Iron and Steelmaking Industry—Part 2: Carburization of Liquid Iron by Addition of Iron–Carbon Briquettes. *Sustainability (Switzerland)* **2022**, *14*, doi:10.3390/su14095383.
3057. Luo, W.; Sandanayake, M.; Zhang, G.; Tan, Y. Construction Cost and Carbon Emission Assessment of a Highway Construction—a Case towards Sustainable Transportation. *Sustainability (Switzerland)* **2021**, *13*, doi:10.3390/su13147854.
3058. Lv, J.; Zhou, T.; Li, K. Development and Investigation of a New Low-Cement-Consumption Concrete-Preplaced Aggregate Concrete. *Sustainability (Switzerland)*

- 2020, 12, doi:10.3390/su12031080.
3059. Majhi, S.; Asilo, L.K.; Mukherjee, A.; George, N.V.; Uy, B. Multimodal Monitoring of Corrosion in Reinforced Concrete for Effective Lifecycle Management of Built Facilities. *Sustainability (Switzerland)* **2022**, *14*, doi:10.3390/su14159696.
3060. Martínez-Muñoz, D.; Martí, J.V.; Yepes, V. Social Impact Assessment Comparison of Composite and Concrete Bridge Alternatives. *Sustainability (Switzerland)* **2022**, *14*, doi:10.3390/su14095186.
3061. Mauder, T.; Brezina, M. Reduction of Co2 Emissions in Steelmaking by Means of Utilization of Steel Plant Waste Heat to Stabilize Seasonal Cooling Water Temperature. *Sustainability (Switzerland)* **2021**, *13*, doi:10.3390/su13115957.
3062. Maxineasa, S.; Isopescu, D.; Baci, I.; Lupu, M. Environmental Performances of a Cubic Modular Steel Structure: A Solution for a Sustainable Development in the Construction Sector. *Sustainability (Switzerland)* **2021**, *13*, doi:10.3390/su132112062.
3063. Mehmood, S.; Wang, X.; Ahmed, W.; Imtiaz, M.; Ditta, A.; Rizwan, M.; Irshad, S.; Bashir, S.; Saeed, Q.; Mustafa, A.; et al. Removal Mechanisms of Slag against Potentially Toxic Elements in Soil and Plants for Sustainable Agriculture Development: A Critical Review. *Sustainability (Switzerland)* **2021**, *13*, doi:10.3390/su13095255.
3064. Melella, R.; Di Ruocco, G.; Sorvillo, A. Circular Construction Process: Method for Developing a Selective, Low Co2eq Disassembly and Demolition Plan. *Sustainability (Switzerland)* **2021**, *13*, doi:10.3390/su13168815.
3065. Menegatti, L.C.; Castrillon Fernandez, L.I.; Caldas, L.R.; Pepe, M.; Pittau, F.; Zani, G.; Rampini, M.C.; Michels, J.; Toledo Filho, R.D.; Martinelli, E. Environmental Performance of Deconstructable Concrete Beams Made with Recycled Aggregates. *Sustainability (Switzerland)* **2022**, *14*, doi:10.3390/su141811457.
3066. Mikhelkis, L.; Govindarajan, V. Techno-Economic and Partial Environmental Analysis of Carbon Capture and Storage (CCS) and Carbon Capture, Utilization, and Storage (CCU/S): Case Study from Proposed Waste-Fed District-Heating Incinerator in Sweden. *Sustainability (Switzerland)* **2020**, *12*, doi:10.3390/SU12155922.
3067. Miskinis, V.; Galinis, A.; Konstantinaviciute, I.; Lekavicius, V.; Neniskis, E. The Role of Renewable Energy Sources in Dynamics of Energy-Related GHG Emissions in the Baltic States. *Sustainability (Switzerland)* **2021**, *13*, doi:10.3390/su131810215.
3068. Mobili, A.; Cosoli, G.; Giulietti, N.; Chiariotti, P.; Pandarese, G.; Bellezze, T.; Revel, G.; Tittarelli, F. Effect of Gasification Char and Recycled Carbon Fibres on the Electrical Impedance of Concrete Exposed to Accelerated Degradation. *Sustainability (Switzerland)* **2022**, *14*, doi:10.3390/su14031775.
3069. Mofidi, A.; Abila, J.; Ng, J.T.M. Novel Advanced Composite Bamboo Structural Members with Bio-Based and Synthetic Matrices for Sustainable Construction. *Sustainability (Switzerland)* **2020**, *12*, doi:10.3390/su12062485.
3070. Momeni, E.; Omidinasab, F.; Dalvand, A.; Goodarzimehr, V.; Eskandari, A.

- Flexural Strength of Concrete Beams Made of Recycled Aggregates: An Experimental and Soft Computing-Based Study. *Sustainability (Switzerland)* **2022**, *14*, doi:10.3390/su141811769.
3071. Morimoto, S.; Cheng, Y.; Mizukoshi, N.; Tahara, K. Methodological Study of Evaluating Future Lightweight Vehicle Scenarios and Co2 Reduction Based on Life Cycle Assessment. *Sustainability (Switzerland)* **2020**, *12*, 1–16, doi:10.3390/su12145713.
  3072. Munir, M.J.; Kazmi, S.M.S.; Wu, Y.-F.; Lin, X.; Ahmad, M.R. Axial Stress-Strain Performance of Recycled Aggregate Concrete Reinforced with Macro-Polypropylene Fibres. *Sustainability (Switzerland)* **2021**, *13*, doi:10.3390/su13105741.
  3073. Nguyen, T.-T.-H.; Mai, H.-H.; Phan, D.-H.; Nguyen, D.-L. Responses of Concrete Using Steel Slag as Coarse Aggregate Replacement under Splitting and Flexure. *Sustainability (Switzerland)* **2020**, *12*, doi:10.3390/SU12124913.
  3074. Ortiz-Grisales, P.; Patiño-Murillo, J.; Duque-Grisales, E. Comparative Study of Computational Models for Reducing Air Pollution through the Generation of Negative Ions. *Sustainability (Switzerland)* **2021**, *13*, doi:10.3390/su13137197.
  3075. Parece, S.; Rato, V.; Resende, R.; Pinto, P.; Stellacci, S. A Methodology to Qualitatively Select Upcycled Building Materials from Urban and Industrial Waste. *Sustainability (Switzerland)* **2022**, *14*, doi:10.3390/su14063430.
  3076. Parrella, V.F.; Molari, L. Building Retrofitting System Based on Bamboo-Steel Hybrid Exoskeleton Structures: A Case Study. *Sustainability (Switzerland)* **2021**, *13*, doi:10.3390/su13115984.
  3077. Pasetto, M.; Baliello, A.; Pasquini, E.; Skaf, M.; Ortega-López, V. Performance-Based Characterization of Bituminous Mortars Prepared with Ladle Furnace Steel Slag. *Sustainability (Switzerland)* **2020**, *12*, doi:10.3390/su12051777.
  3078. Passoni, C.; Palumbo, E.; Pinho, R.; Marini, A. The LCT Challenge: Defining New Design Objectives to Increase the Sustainability of Building Retrofit Interventions. *Sustainability (Switzerland)* **2022**, *14*, doi:10.3390/su14148860.
  3079. Pasternack, R.; Wishnie, M.; Clarke, C.; Wang, Y.; Belair, E.; Marshall, S.; Gu, H.; Nepal, P.; Dolezal, F.; Lomax, G.; et al. What Is the Impact of Mass Timber Utilization on Climate and Forests? *Sustainability (Switzerland)* **2022**, *14*, doi:10.3390/su14020758.
  3080. Petrescu, L.; Chisalita, D.-A.; Cormos, C.-C.; Manzolini, G.; Cobden, P.; van Dijk, H.A.J. Life Cycle Assessment of SEWGS Technology Applied to Integrated Steel Plants. *Sustainability (Switzerland)* **2019**, *11*, doi:10.3390/su11071825.
  3081. Piemonti, A.; Conforti, A.; Cominoli, L.; Sorlini, S.; Luciano, A.; Plizzari, G. Use of Iron and Steel Slags in Concrete: State of the Art and Future Perspectives. *Sustainability (Switzerland)* **2021**, *13*, 1–27, doi:10.3390/su13020556.
  3082. Pinto, J.; Morales, M.; Fedoruk, M.; Kovaleva, M.; Diemer, A. Servitization in Support of Sustainable Cities: What Are Steel's Contributions and Challenges? *Sustainability (Switzerland)* **2019**, *11*, doi:10.3390/su11030855.

3083. Puettmann, M.; Pierobon, F.; Ganguly, I.; Gu, H.; Chen, C.; Liang, S.; Jones, S.; Maples, I.; Wishnie, M. Comparative Lcas of Conventional and Mass Timber Buildings in Regions with Potential for Mass Timber Penetration. *Sustainability (Switzerland)* **2021**, *13*, doi:10.3390/su132413987.
3084. Pujadas-Gispert, E.; Vogtländer, J.G.; Moonen, S.P.G. Environmental and Economic Optimization of a Conventional Concrete Building Foundation: Selecting the Best of 28 Alternatives by Applying the Pareto Front. *Sustainability (Switzerland)* **2021**, *13*, 1–19, doi:10.3390/su13031496.
3085. Qi, J.; Yang, H.-C. Improvement of a Truss-Reinforced, Half-Concrete Slab Floor System for Construction Sustainability. *Sustainability (Switzerland)* **2021**, *13*, doi:10.3390/su13073731.
3086. Qi, Y.; Indraratna, B.; Ngo, T.; Ferreira, F.B. Advancements in Geo-Inclusions for Ballasted Track: Constitutive Modelling and Numerical Analysis. *Sustainability (Switzerland)* **2021**, *13*, doi:10.3390/su13169048.
3087. Quan, B.; Li, S.; Wu, K.-J. Optimizing the Vehicle Scheduling Problem for Just-in-Time Delivery Considering Carbon Emissions and Atmospheric Particulate Matter. *Sustainability (Switzerland)* **2022**, *14*, doi:10.3390/su14106181.
3088. Rahman, M.M.; Rahman, M.S.; Chowdhury, S.R.; Elhaj, A.; Razzak, S.A.; Abu Shoaib, S.; Islam, M.K.; Islam, M.M.; Rushd, S.; Rahman, S.M. Greenhouse Gas Emissions in the Industrial Processes and Product Use Sector of Saudi Arabia—An Emerging Challenge. *Sustainability (Switzerland)* **2022**, *14*, doi:10.3390/su14127388.
3089. Reimer, L.; Kaluza, A.; Cerdas, F.; Meschke, J.; Vietor, T.; Herrmann, C. Design of Eco-Efficient Body Parts for Electric Vehicles Considering Life Cycle Environmental Information. *Sustainability (Switzerland)* **2020**, *12*, doi:10.3390/su12145838.
3090. Roik, T.; Gavrysh, O.; Rashedi, A.; Khanam, T.; Raza, A.; Jeong, B. New Antifriction Composites for Printing Machines Based on Tool Steel Grinding Waste. *Sustainability (Switzerland)* **2022**, *14*, doi:10.3390/su14052799.
3091. Rovelli, D.; Brondi, C.; Andreotti, M.; Abbate, E.; Zanforlin, M.; Ballarino, A. A Modular Tool to Support Data Management for LCA in Industry: Methodology, Application and Potentialities. *Sustainability (Switzerland)* **2022**, *14*, doi:10.3390/su14073746.
3092. Rubio-Cintas, M.D.; Parron-Rubio, M.E.; Perez-Garcia, F.; Ribeiro, A.B.; Oliveira, M.J. Influence of Steel Slag Type on Concrete Shrinkage. *Sustainability (Switzerland)* **2021**, *13*, 1–13, doi:10.3390/su13010214.
3093. Salvalai, G.; Sesana, M.; Brutti, D.; Imperadori, M. Design and Performance Analysis of a Lightweight Flexible NZEB. *Sustainability (Switzerland)* **2020**, *12*, doi:10.3390/su12155986.
3094. Santos, P.; Poologanathan, K. The Importance of Stud Flanges Size and Shape on the Thermal Performance of Lightweight Steel Framed Walls. *Sustainability (Switzerland)* **2021**, *13*, doi:10.3390/su13073970.

3095. Schoeman, Y.; Oberholster, P.; Somerset, V. A Zero-waste Multi-criteria Decision-support Model for the Iron and Steel Industry in Developing Countries: A Case Study. *Sustainability (Switzerland)* **2021**, *13*, 1–23, doi:10.3390/su13052832.
3096. Segundo, I.R.; Zahabizadeh, B.; Landi, S., Jr.; Lima, O., Jr.; Afonso, C.; Borinelli, J.; Freitas, E.; Cunha, V.M.C.F.; Teixeira, V.; Costa, M.F.M.; et al. Functionalization of Smart Recycled Asphalt Mixtures: A Sustainability Scientific and Pedagogical Approach. *Sustainability (Switzerland)* **2022**, *14*, doi:10.3390/su14010573.
3097. Seol, Y.; Lee, S.; Lee, J.; Han, J.; Hong, G. Excavation Method Determination of Earth-Retaining Wall for Sustainable Environment and Economy: Life Cycle Assessment Based on Construction Cases in Korea. *Sustainability (Switzerland)* **2021**, *13*, doi:10.3390/su13052974.
3098. Sgrigna, G.; Relvas, H.; Miranda, A.I.; Calfapietra, C. Particulate Matter in an Urban–Industrial Environment: Comparing Data of Dispersion Modeling with Tree Leaves Deposition. *Sustainability (Switzerland)* **2022**, *14*, doi:10.3390/su14020793.
3099. Shao, J.; Xiang, N.; Zhang, Y.; Li, X.; Liang, G. Dynamic Simulation of Integrated Cleaner Production Strategies towards High Quality Development in a Heavily Air-Polluted City in China. *Sustainability (Switzerland)* **2021**, *13*, doi:10.3390/su13168951.
3100. Shin, H.-K.; Cho, J.-M.; Lee, E.-B. Electrical Power Characteristics and Economic Analysis of Distributed Generation System Using Renewable Energy: Applied to Iron and Steel Plants. *Sustainability (Switzerland)* **2019**, *11*, doi:10.3390/su11226199.
3101. Sicignano, E.; Di Ruocco, G.; Melella, R. Mitigation Strategies for Reduction of Embodied Energy and Carbon, in the Construction Systems of Contemporary Quality Architecture. *Sustainability (Switzerland)* **2019**, *11*, doi:10.3390/su11143806.
3102. Soltanzadeh, F.; Behbahani, A.E.; Hosseinmostofi, K.; Teixeira, C.A. Assessment of the Sustainability of Fibre-Reinforced Concrete by Considering Both Environmental and Mechanical Properties. *Sustainability (Switzerland)* **2022**, *14*, doi:10.3390/su14106347.
3103. Son, S.; Park, K.; Fitriani, H.; Kim, S. Embodied Co2 Reduction Effects of Composite Precast Concrete Frame for Heavily Loaded Long-Span Logistics Buildings. *Sustainability (Switzerland)* **2021**, *13*, doi:10.3390/SU13031060.
3104. Taneja, P.; van der Kloot, G.R.; van Koningsveld, M. Sustainability Performance of Port Infrastructure—a Case Study of a Quay Wall. *Sustainability (Switzerland)* **2021**, *13*, doi:10.3390/su132111932.
3105. Tang, H.; Jiang, P.; He, J.; Ma, W. Synergies of Cutting Air Pollutants and CO2 Emissions by the End-of-Pipe Treatment Facilities in a Typical Chinese Integrated Steel Plant. *Sustainability (Switzerland)* **2020**, *12*, doi:10.3390/su12125157.
3106. Tang, W.; Khavarian, M.; Yousefi, A.; Chan, R.W.K.; Cui, H. Influence of Surface Treatment of Recycled Aggregates on Mechanical Properties and Bond Strength of Self-Compacting Concrete. *Sustainability (Switzerland)* **2019**, *11*, doi:10.3390/su11154182.

3107. Taranu, G.; Venghiac, V.-M.; Olteanu-Dontov, I.; Rotaru, A.; Toma, I.-O. Sustainable Design for CFS Structures: Experimental Data and Numerical Models of Hinged Connections. *Sustainability (Switzerland)* **2022**, *14*, doi:10.3390/su14137813.
3108. Tholen, L.; Leipprand, A.; Kiyar, D.; Maier, S.; Küper, M.; Adisorn, T.; Fischer, A. The Green Hydrogen Puzzle: Towards a German Policy Framework for Industry. *Sustainability (Switzerland)* **2021**, *13*, doi:10.3390/su132212626.
3109. Torres-Guevara, L.E.; Prieto-Sandoval, V.; Mejia-Villa, A. Success Drivers for Implementing Circular Economy: A Case Study from the Building Sector in Colombia. *Sustainability (Switzerland)* **2021**, *13*, 1–17, doi:10.3390/su13031350.
3110. Tsai, C.-H.; Shen, Y.-H.; Tsai, W.-T. Sustainable Material Management of Industrial Hazardous Waste in Taiwan: Case Studies in Circular Economy. *Sustainability (Switzerland)* **2021**, *13*, doi:10.3390/su13169410.
3111. Tsai, W.-H.; Lan, S.-H.; Huang, C.-T. Activity-Based Standard Costing Product-Mix Decision in the Future Digital Era: Green Recycling Steel-Scrap Material for Steel Industry. *Sustainability (Switzerland)* **2019**, *11*, doi:10.3390/su11030899.
3112. Tsai, W.-H.; Lan, S.-H.; Lee, H.-L. Applying ERP and MES to Implement the IFRS 8 Operating Segments: A Steel Group's Activity-Based Standard Costing Production Decision Model. *Sustainability (Switzerland)* **2020**, *12*, doi:10.3390/su12104303.
3113. Václavík, V.; Ondová, M.; Dvorský, T.; Eštoková, A.; Fabiánová, M.; Gola, L. Sustainability Potential Evaluation of Concrete with Steel Slag Aggregates by the Lca Method. *Sustainability (Switzerland)* **2020**, *12*, 1–21, doi:10.3390/su12239873.
3114. Vilcekova, S.; Harcarova, K.; Monokova, A.; Burdova, E. Life Cycle Assessment and Indoor Environmental Quality of Wooden Family Houses. *Sustainability (Switzerland)* **2020**, *12*, doi:10.3390/su122410557.
3115. Vives, I.; Varona, F.B.; Tenza-Abril, A.J.; Pereiro-Barceló, J. A Parametric Study to Assess Lightweight Aggregate Concrete for Future Sustainable Construction of Reinforced Concrete Beams. *Sustainability (Switzerland)* **2021**, *13*, doi:10.3390/su132413893.
3116. Wang, C.; Chen, Y.; Zhou, M.; Chen, F. Control of Early-Age Cracking in Super-Long Mass Concrete Structures. *Sustainability (Switzerland)* **2022**, *14*, doi:10.3390/su14073809.
3117. Wesolowski, M.; Rumak, A.; Iwanowski, P.; Poswiata, A. Assessment of the Impact of Atmospheric Corrosivity on the Cement Concrete Airfield Pavement's Operation Process. *Sustainability (Switzerland)* **2020**, *12*, 1–13, doi:10.3390/su12229560.
3118. Xing, K.; Kim, K.; Ness, D. Cloud-BIM Enabled Cyber-Physical Data and Service Platforms for Building Component Reuse. *Sustainability (Switzerland)* **2020**, *12*, doi:10.3390/su122410329.
3119. Xue, Z.; Liu, H.; Zhang, Q.; Wang, J.; Fan, J.; Zhou, X. The Impact Assessment of Campus Buildings Based on a Life Cycle Assessment-Life Cycle Cost Integrated

- Model. *Sustainability (Switzerland)* **2020**, *12*, doi:10.3390/su12010294.
3120. Yadav, M.; Sliem, M.H.; Abdullah, A.M.; Youssef, K.M.; Al-Qahtani, N.H. Impact of Prolonged Exposure to Sour Service on the Mechanical Properties and Corrosion Mechanism of NACE Carbon Steel Material Used in Wet Sour Gas Multiphase Pipeline. *Sustainability (Switzerland)* **2022**, *14*, doi:10.3390/su14138015.
  3121. Yepes, V.; Martí, J.V.; García, J. Black Hole Algorithm for Sustainable Design of Counterfort Retaining Walls. *Sustainability (Switzerland)* **2020**, *12*, doi:10.3390/su12072767.
  3122. Yu, Y.; Bai, J.; Wang, X.; Zhang, L. Control of the Surrounding Rock of a Goaf-Side Entry Driving Heading Mining Face. *Sustainability (Switzerland)* **2020**, *12*, doi:10.3390/su12072623.
  3123. Yusof, M.F.; Zainol, M.R.R.M.A.; Riahi, A.; Zakaria, N.A.; Shaharuddin, S.; Juiani, S.F.; Noor, N.M.; Zawawi, M.H.; Ikhsan, J. Investigation on the Urban Grey Water Treatment Using a Cost-Effective Solar Distillation Still. *Sustainability (Switzerland)* **2022**, *14*, doi:10.3390/su14159452.
  3124. Zackrisson, M.; Jönsson, C.; Johannisson, W.; Fransson, K.; Posner, S.; Zenkert, D.; Lindbergh, G. Prospective Life Cycle Assessment of a Structural Battery. *Sustainability (Switzerland)* **2019**, *11*, doi:10.3390/su11205679.
  3125. Zeng, B.; Zhu, L. Market Power and Technology Diffusion in an Energy-Intensive Sector Covered by an Emissions Trading Scheme. *Sustainability (Switzerland)* **2019**, *11*, doi:10.3390/su11143870.
  3126. Zhan, J.; Wang, C.; Fang, Z. Condition Assessment of Joints in Steel Truss Bridges Using a Probabilistic Neural Network and Finite Element Model Updating. *Sustainability (Switzerland)* **2021**, *13*, 1–20, doi:10.3390/su13031474.
  3127. Zhang, J.; Wang, D.; Xiang, S.; Liu, Y.; Tan, B.; Yan, D. Optimization Method of Temperature Measuring Point Layout for Steel-Concrete Composite Bridge Based on TLS-IPDP. *Sustainability (Switzerland)* **2022**, *14*, doi:10.3390/su14159787.
  3128. Zhang, P.; Yang, Y.; Wang, J.; Hu, S.; Jiao, M.; Ling, Y. Mechanical Properties and Durability of Polypropylene and Steel Fiber-Reinforced Recycled Aggregates Concrete (FRRAC): A Review. *Sustainability (Switzerland)* **2020**, *12*, 1–28, doi:10.3390/su12229509.
  3129. Zhang, S.; Huo, Z.; Zhai, C. Building Carbon Emission Scenario Prediction Using STIRPAT and GA-BP Neural Network Model. *Sustainability (Switzerland)* **2022**, *14*, doi:10.3390/su14159369.
  3130. Zhang, Z.; Wang, H.; Yang, T.; Wang, L.; Wang, X. Fatigue Durability Analysis for Suspenders of Arch Bridge Subjected to Moving Vehicles in Southwest China. *Sustainability (Switzerland)* **2022**, *14*, doi:10.3390/su141610008.
  3131. Zheng, T.; Lin, X.; Xu, J.; Ren, J.; Sun, D.; Gu, Y.; Huang, J. Enhanced Nitrogen Removal of Steel Rolling Wastewater by Constructed Wetland Combined with Sulfur Autotrophic Denitrification. *Sustainability (Switzerland)* **2021**, *13*, 1–13, doi:10.3390/su13031559.
  3132. Rahman, M.M.; Avtar, R.; Ahmad, S.; Inostroza, L.; Misra, P.; Kumar, P.; Takeuchi,

- W.; Surjan, A.; Saito, O. Does Building Development in Dhaka Comply with Land Use Zoning? An Analysis Using Nighttime Light and Digital Building Heights. *Sustainability Science* **2021**, *16*, 1323–1340, doi:10.1007/s11625-021-00923-0.
3133. Wu, J.; Xia, Y.; Voigt, S. Impacts of Strategic Behavior in Regional Coalitions under the Sectoral Expansion of the Carbon Market in China. *Sustainability Science* **2022**, *17*, 1767–1779, doi:10.1007/s11625-022-01144-9.
3134. Basaleh, A.A.; Al-Malack, M.H.; Saleh, T.A. Poly (Acrylamide Acrylic Acid)/Baghouse Dust Magnetic Composite Hydrogel as an Efficient Adsorbent for Metals and MB; Synthesis, Characterization, Mechanism, and Statistical Analysis. *Sustainable Chemistry and Pharmacy* **2021**, *23*, doi:10.1016/j.scp.2021.100503.
3135. Gómez-Casero, M.A.; Pérez-Villarejo, L.; Sánchez-Soto, P.J.; Eliche-Quesada, D. Comparative Study of Alkali Activated Cements Based on Metallurgical Slags, in Terms of Technological Properties Developed. *Sustainable Chemistry and Pharmacy* **2022**, *29*, doi:10.1016/j.scp.2022.100746.
3136. Singh, A.; Ansari, K.R.; Alanazi, A.K.; Quraishi, M.A.; Ali, I.H.; Lin, Y. Probing Inhibition Effect of Novel Biopolymer Based Composite for the Inhibition of P110 Steel Corrosion in 15% HCl under Dynamic Condition. *Sustainable Chemistry and Pharmacy* **2022**, *26*, doi:10.1016/j.scp.2022.100599.
3137. Ansah, M.K.; Chen, X.; Yang, H.; Lu, L.; Lam, P.T.I. An Integrated Life Cycle Assessment of Different Façade Systems for a Typical Residential Building in Ghana. *Sustainable Cities and Society* **2020**, *53*, doi:10.1016/j.scs.2019.101974.
3138. Franco, L.C.; Mendes, J.C.; Costa, L.C.B.; Pira, R.R.; Peixoto, R.A.F. Design and Thermal Evaluation of a Social Housing Model Conceived with Bioclimatic Principles and Recycled Aggregates. *Sustainable Cities and Society* **2019**, *51*, doi:10.1016/j.scs.2019.101725.
3139. He, J.; Yue, Q.; Li, Y.; Zhao, F.; Wang, H. Driving Force Analysis of Carbon Emissions in China's Building Industry: 2000–2015. *Sustainable Cities and Society* **2020**, *60*, doi:10.1016/j.scs.2020.102268.
3140. Navarro-Rubio, J.; Pineda, P.; Garcia-Martinez, A. Sustainability, Prefabrication and Building Optimization under Different Durability and Re-Using Scenarios: Potential of Dry Precast Structural Connections. *Sustainable Cities and Society* **2019**, *44*, 614–628, doi:10.1016/j.scs.2018.10.045.
3141. Vaez, P.; Sabouhi, F.; Jabalameli, M.S. Sustainability in a Lot-Sizing and Scheduling Problem with Delivery Time Window and Sequence-Dependent Setup Cost Consideration. *Sustainable Cities and Society* **2019**, *51*, doi:10.1016/j.scs.2019.101718.
3142. Xiong, J.; Zhu, J.; He, Y.; Ren, S.; Huang, W.; Lu, F. The Application of Life Cycle Assessment for the Optimization of Pipe Materials of Building Water Supply and Drainage System. *Sustainable Cities and Society* **2020**, *60*, doi:10.1016/j.scs.2020.102267.
3143. Shavakyleva, O.P.; Sedinkina, N.A.; Gmyzina, N.V.; Kosarev, L.V. Development of Technology for Slags Integrated Processing at Zlatoust Steel Mill. *Sustainable*



- Development of Mountain Territories* **2022**, *14*, 87–95, doi:10.21177/1998-4502-2022-14-1-87-95.
3144. Ostovari, H.; Sternberg, A.; Bardow, A. Rock “n” Use of CO<sub>2</sub>: Carbon Footprint of Carbon Capture and Utilization by Mineralization. *Sustainable Energy and Fuels* **2020**, *4*, 4482–4496, doi:10.1039/d0se00190b.
3145. Backes, J.G.; D’Amico, A.; Pauliks, N.; Guarino, S.; Traverso, M.; Lo Brano, V. Life Cycle Sustainability Assessment of a Dish-Stirling Concentrating Solar Power Plant in the Mediterranean Area. *Sustainable Energy Technologies and Assessments* **2021**, *47*, doi:10.1016/j.seta.2021.101444.
3146. Chen, A.; Tian, Z.; Han, R.; Wei, X.; Hu, R.; Chen, Y. Preparation of Ni-Based Steel Slag Catalyst by Impregnation Method for Sludge Steam Gasification. *Sustainable Energy Technologies and Assessments* **2021**, *47*, doi:10.1016/j.seta.2021.101553.
3147. Wiah, E.; Addor, J.; Alao, F. Transitional Probabilities for Plastic Waste Management and Implication on Sustainability. *Sustainable Environment* **2022**, *8*, doi:10.1080/27658511.2022.2118654.
3148. Wang, Y.; Chen, J.; Fu, B.; Zhang, L.; Liu, H.; Huang, Y.; Song, G. Research on Co-Disposal and Utilization of Ferrous Packaging Containers Contaminated with Hazardous Wastes by Steel Converter. *Sustainable Environment Research* **2022**, *32*, doi:10.1186/s42834-022-00148-5.
3149. Yang, H.-H.; Gupta, S.K.; Dhital, N.B. Emission Factor, Relative Ozone Formation Potential and Relative Carcinogenic Risk Assessment of VOCs Emitted from Manufacturing Industries. *Sustainable Environment Research* **2020**, *30*, doi:10.1186/s42834-020-00068-2.
3150. Devasahayam, S. Review: Opportunities for Simultaneous Energy/Materials Conversion of Carbon Dioxide and Plastics in Metallurgical Processes. *Sustainable Materials and Technologies* **2019**, *22*, doi:10.1016/j.susmat.2019.e00119.
3151. Ezzat, M.N.; Ali, Z.T.A. Green Approach for Fabrication of Graphene from Polyethylene Terephthalate (PET) Bottle Waste as Reactive Material for Dyes Removal from Aqueous Solution: Batch and Continuous Study. *Sustainable Materials and Technologies* **2022**, *32*, doi:10.1016/j.susmat.2022.e00404.
3152. Ghosh, T.; Kim, H.C.; De Kleine, R.; Wallington, T.J.; Bakshi, B.R. Life Cycle Energy and Greenhouse Gas Emissions Implications of Using Carbon Fiber Reinforced Polymers in Automotive Components: Front Subframe Case Study. *Sustainable Materials and Technologies* **2021**, *28*, doi:10.1016/j.susmat.2021.e00263.
3153. Gobetti, A.; Cornacchia, G.; Ramorino, G.; Riboldi, A.; Depero, L. EAF Slag as Alternative Filler for Epoxy Screeds, an Example of Green Reuse. *Sustainable Materials and Technologies* **2021**, *29*, doi:10.1016/j.susmat.2021.e00324.
3154. Khanna, N.; Shah, P.; Sarikaya, M.; Pusavec, F. Energy Consumption and Ecological Analysis of Sustainable and Conventional Cutting Fluid Strategies in Machining 15–5 PHSS. *Sustainable Materials and Technologies* **2022**, *32*, doi:10.1016/j.susmat.2022.e00416.
3155. Kim, D.M.; Kim, H.I.; Park, H.W. Tool Wear, Economic Costs, and CO<sub>2</sub> Emissions

- Analysis in Cryogenic Assisted Hard-Turning Process of AISI 52100 Steel. *Sustainable Materials and Technologies* **2021**, *30*, doi:10.1016/j.susmat.2021.e00349.
3156. Kolawole, J.T.; Babafemi, A.J.; Paul, S.C.; du Plessis, A. Performance of Concrete Containing Nigerian Electric Arc Furnace Steel Slag Aggregate towards Sustainable Production. *Sustainable Materials and Technologies* **2020**, *25*, doi:10.1016/j.susmat.2020.e00174.
  3157. Makul, N. Modern Sustainable Cement and Concrete Composites: Review of Current Status, Challenges and Guidelines. *Sustainable Materials and Technologies* **2020**, *25*, doi:10.1016/j.susmat.2020.e00155.
  3158. Mohanty, U.K.; Kapil, A.; Abe, Y.; Suga, T.; Tanaka, M.; Sharma, A. A Resource-Efficient Process Design for Heavy Fabrication: A Case of Single-Pass-per-Layer Narrow Gap Welding. *Sustainable Materials and Technologies* **2022**, *33*, doi:10.1016/j.susmat.2022.e00488.
  3159. Shishegaran, A.; Safari, S.; Karami, B. Sustainability Evaluation for Selecting the Best Optimized Structural Designs of a Tall Building. *Sustainable Materials and Technologies* **2022**, *33*, doi:10.1016/j.susmat.2022.e00482.
  3160. Singh, A.; Sharma, V. A Comparative Appraisal of Sustainable Strategy in Ultrasonic Assisted Grinding of Nimonic 80A Using Novel Green Atomized Cutting Fluid. *Sustainable Materials and Technologies* **2022**, *32*, doi:10.1016/j.susmat.2022.e00423.
  3161. Yi, H.; Oh, K.; Kou, R.; Qiao, Y. Sand-Filler Structural Material with a Low Content of Polyethylene Binder. *Sustainable Materials and Technologies* **2020**, *25*, doi:10.1016/j.susmat.2020.e00194.
  3162. Mendonça, P.; Faiq, N.; Fernandes, J.; Mateus, R. Simulation Tools for Energy Performance Evaluation of Buildings with Minimum Material Resources. *Sustainable Mediterranean Construction* **2019**, *2019*, 93–99.
  3163. Błażejowski, T.; Walker, S.R.; Muazu, R.I.; Rothman, R.H. Reimagining the Milk Supply Chain: Reusable Vessels for Bulk Delivery. *Sustainable Production and Consumption* **2021**, *27*, 1030–1046, doi:10.1016/j.spc.2021.02.030.
  3164. Changwichean, K.; Gheewala, S.H. Choice of Materials for Takeaway Beverage Cups towards a Circular Economy. *Sustainable Production and Consumption* **2020**, *22*, 34–44, doi:10.1016/j.spc.2020.02.004.
  3165. Duan, H.; Hou, C.; Yang, W.; Song, J. Towards Lower CO<sub>2</sub> Emissions in Iron and Steel Production: Life Cycle Energy Demand-LEAP Based Multi-Stage and Multi-Technique Simulation. *Sustainable Production and Consumption* **2022**, *32*, 270–281, doi:10.1016/j.spc.2022.04.028.
  3166. Muller, S.; Lai, F.; Beylot, A.; Boitier, B.; Villeneuve, J. No Mining Activities, No Environmental Impacts? Assessing the Carbon Footprint of Metal Requirements Induced by the Consumption of a Country with Almost No Mines. *Sustainable Production and Consumption* **2020**, *22*, 24–33, doi:10.1016/j.spc.2020.02.002.
  3167. Pryshlakivsky, J.; Searcy, C. An Uncertainty Analysis of the Energy Intensity of 37 Materials Used in Automobile Manufacturing: Statistical Methods and

- Recommendations. *Sustainable Production and Consumption* **2020**, *24*, 12–25, doi:10.1016/j.spc.2020.04.008.
3168. Scope, C.; Vogel, M.; Guenther, E. Greener, Cheaper, or More Sustainable: Reviewing Sustainability Assessments of Maintenance Strategies of Concrete Structures. *Sustainable Production and Consumption* **2021**, *26*, 838–858, doi:10.1016/j.spc.2020.12.022.
3169. van Straten, B.; Dankelman, J.; van der Eijk, A.; Horeman, T. A Circular Healthcare Economy; a Feasibility Study to Reduce Surgical Stainless Steel Waste. *Sustainable Production and Consumption* **2021**, *27*, 169–175, doi:10.1016/j.spc.2020.10.030.
3170. Puneeth, H.V.; Ganesha Prasad, M.S. Sustainable In-Situ Recycling and IoT-Based Monitoring System of Water-Soluble Metal Working Fluids. *Sustainable Water Resources Management* **2022**, *8*, doi:10.1007/s40899-021-00589-7.
3171. Sharifi, F.; Nourouzi, M.M.; Tahmourespour, A. Effect of Gray Water Reuse on Toilet Flush Tank Bacterial and Scum Formation. *Sustainable Water Resources Management* **2020**, *6*, doi:10.1007/s40899-020-00461-0.
3172. Zhuang, C.; Fu, B.; Deng, A.; Huang, G.; Zhang, H. Parameter Optimization of Integration of Light Steel Roof and Air Collector with V-Shaped Perforated Blocks. *Taiyangneng Xuebao/Acta Energiæ Solaris Sinica* **2019**, *40*, 488–495.
3173. Dufresne, M.; Frelat, M.; Isel, S.; Manjarres, A.; Schaer, N.; Sacerdote, G.; Vazquez, J.; Wertel, J. Computational Fluid Dynamics (CFD) and Test Bench Validation of a U-Notch Weir for Combined Sewer Overflow (CSO) Self-Monitoring. *Techniques - Sciences - Methodes* **2021**, *166*, 103–114.
3174. Arifuzzaman, M.; Millhouse, P.W.; Raval, Y.; Pace, T.B.; Behrend, C.J.; Beladi Behbahani, S.; DesJardins, J.D.; Tzeng, T.-R.J.; Anker, J.N. An Implanted PH Sensor Read Using Radiography. *The Analyst* **2019**, *144*, 2984–2993, doi:10.1039/c8an02337a.
3175. Venugopal, V.; Latha, P.K.; Shanmugam, R.; Krishnamoorthy, M.; Srinivasan, K.; Perumal, K.; Chinnadurai, J.S. Risk of Kidney Stone among Workers Exposed to High Occupational Heat Stress - A Case Study from Southern Indian Steel Industry. *The Science of the total environment* **2020**, *722*, 137619, doi:10.1016/j.scitotenv.2020.137619.
3176. Balunov, B.F.; Nikitin, V.I.; Rybnikov, A.I.; Lychakov, V.D.; Shcheglov, A.A.; Starukhina, K.S.; Matyash, A.S.; Borisov, A.O.; Pugachev, N.S. Long-Term High-Temperature Longevity Testing of Thermosyphons with Actual Dimensions. *Thermal Engineering* **2019**, *66*, 279–286, doi:10.1134/S0040601519040025.
3177. Kirilina, A.V.; Suslov, S.Y.; Kozlovskii, V.V.; Larin, A.B. Water Chemistry Development for a Thermal Power Plant Circulating Cooling System Using the VTIAMIN EKO-1 Chemical Agent. *Thermal Engineering* **2019**, *66*, 750–759, doi:10.1134/S0040601519100021.
3178. Legkikh, K.G.; Smykov, V.B.; Tyapkov, V.F. Calculated Evaluation of Mass Transfer of Corrosive Hydrogen in a Steam Generator of a Sodium Water Type during Chemical Washing and in Operation. *Thermal Engineering* **2022**, *69*, 217–

- 221, doi:10.1134/S0040601522030077.
3179. Sedlář, M.; Komárek, M.; Šoukal, J.; Volkov, A.V.; Ryzhenkov, A.V.; Druzhinin, A.A.; Grigoriev, S.V.; Kachalin, G.V.; Kalakutskaya, O.V. Experimental and Numerical Studies into the Cavitation Impact of the Hydrofoil Surface with Different Treatments. *Thermal Engineering* **2022**, *69*, 418–428, doi:10.1134/S0040601522060064.
3180. Tomarov, G.V.; Shipkov, A.A. Application of Software Tools for Predicting the Corrosion-Erosion Rate to Ensure Integrity of Equipment and Piping of Power Units at Nuclear Power Stations. *Thermal Engineering* **2020**, *67*, 580–590, doi:10.1134/S0040601520080054.
3181. Liu, H.; Zhu, R.; Wang, X.; Li, G.; Cui, Q.; Xu, C.; Huang, Y. MEASURING SURFACE TEMPERATURES OF DIFFERENT TYPES OF FLY ASH SAMPLES USING A CCD CAMERA. *Thermal Science* **2022**, *26*, 1277–1288, doi:10.2298/TSCI200620191L.
3182. SLEFARSKI, R.; CZYZEWSKI, P.; GOLEBIEWSKI, M. EXPERIMENTAL STUDY ON COMBUSTION OF CH<sub>4</sub>/NH<sub>3</sub> FUEL BLENDS IN AN INDUSTRIAL FURNACE OPERATED IN FLAMELESS CONDITIONS. *Thermal Science* **2020**, *24*, 3625–36235, doi:10.2298/TSCI200401282S.
3183. Wang, K.; Li, Q.; Cheng, K.; Wang, J. Experimental Investigation on Efficient Heat Collection of Aboveground Pipes. *Thermal Science* **2020**, *24*, 1445–1460, doi:10.2298/TSCI190727423W.
3184. Xiao, Y.; Wang, H.; Deng, S.; Su, F.; Wen, Z. Drying Characteristics Of Sludge In A Rotary Drum For Fast-Drying Application. *Thermal Science* **2021**, *25*, 3945–3955, doi:10.2298/TSCI200720303X.
3185. Chaiyat, N. Energy, Exergy, Economic, and Environmental Analysis of an Organic Rankine Cycle Integrating with Infectious Medical Waste Incinerator. *Thermal Science and Engineering Progress* **2021**, *22*, doi:10.1016/j.tsep.2020.100810.
3186. Kythavone, L.; Chaiyat, N. Life Cycle Assessment of a Very Small Organic Rankine Cycle and Municipal Solid Waste Incinerator for Infectious Medical Waste. *Thermal Science and Engineering Progress* **2020**, *18*, doi:10.1016/j.tsep.2020.100526.
3187. Dehghani, F.; Omid, F.; Fallahzadeh, R.A.; Pourhassan, B. Health Risk Assessment of Occupational Exposure to Heavy Metals in a Steel Casting Unit of a Steelmaking Plant Using Monte–Carlo Simulation Technique. *Toxicology and Industrial Health* **2021**, *37*, 431–440, doi:10.1177/07482337211019593.
3188. Hollins, D.; Burns, A.; Unice, K.; Paustenbach, D.J. An Analysis of Workplace Exposures to Asbestos at Three Steel Mills Located in the United States (1972–1982). *Toxicology and Industrial Health* **2019**, *35*, 726–737, doi:10.1177/0748233719893905.
3189. Afshari, A.A.; McKinney, W.; Cumpston, J.L.; Leonard, H.D.; Cumpston, J.B.; Meighan, T.G.; Jackson, M.; Friend, S.; Kodali, V.; Lee, E.G.; et al. Development of a Thermal Spray Coating Aerosol Generator and Inhalation Exposure System.

- Toxicology Reports* **2022**, *9*, 126–135, doi:10.1016/j.toxrep.2022.01.004.
3190. Breheny, D.; Thorne, D.; Baxter, A.; Bozhilova, S.; Jaunky, T.; Santopietro, S.; Taylor, M.; Terry, A.; Gaça, M. The in Vitro Assessment of a Novel Vaping Technology. *Toxicology Reports* **2020**, *7*, 1145–1156, doi:10.1016/j.toxrep.2020.08.016.
3191. Dabrowska, D.; Rykala, W. A Review of Lysimeter Experiments Carried out on Municipal Landfill Waste. *Toxics* **2021**, *9*, 1–13, doi:10.3390/toxics9020026.
3192. El-Saadani, Z.; Mingqi, W.; He, Z.; Hamukwaya, S.L.; Abdel Wahed, M.S.M.; Khatita, A.A. Environmental Geochemistry and Fractionation of Cadmium Metal in Surficial Bottom Sediments and Water of the Nile River, Egypt. *Toxics* **2022**, *10*, doi:10.3390/toxics10050221.
3193. Loncnar, M.; Mladenovič, A.; Zalar Serjun, V.; Zupančič, M.; van der Sloot, H.A. Leaching and Geochemical Modelling of an Electric Arc Furnace (EAF) and Ladle Slag Heap. *Toxics* **2022**, *10*, doi:10.3390/toxics10010010.
3194. Silva-Castro, G.A.; Rodríguez-Calvo, A.; Robledo-Mahón, T.; Aranda, E.; González-López, J.; Calvo, C. Design of Bio-Absorbent Systems for the Removal of Hydrocarbons from Industrial Wastewater: Pilot-Plant Scale. *Toxics* **2021**, *9*, doi:10.3390/toxics9070162.
3195. Tavares, A.M.; Viegas, S.; Louro, H.; Göen, T.; Santonen, T.; Luijten, M.; Kortenkamp, A.; Silva, M.J. Occupational Exposure to Hexavalent Chromium, Nickel and PAHs: A Mixtures Risk Assessment Approach Based on Literature Exposure Data from European Countries. *Toxics* **2022**, *10*, doi:10.3390/toxics10080431.
3196. Thalassinou, G.; Antoniadis, V. Monitoring Potentially Toxic Element Pollution in Three Wheat-Grown Areas with a Long History of Industrial Activity and Assessment of Their Effect on Human Health in Central Greece. *Toxics* **2021**, *9*, doi:10.3390/toxics9110293.
3197. Wysokowski, A. Impact of Live Load on Changes of Backfill Properties of Buried Flexible Steel Railway Structure. *Transportation Infrastructure Geotechnology* **2021**, doi:10.1007/s40515-021-00204-4.
3198. Landgraf, M.; Zeiner, M.; Knabl, D.; Corman, F. Environmental Impacts and Associated Costs of Railway Turnouts Based on Austrian Data. *Transportation Research Part D: Transport and Environment* **2022**, *103*, doi:10.1016/j.trd.2021.103168.
3199. Rempelos, G.; Preston, J.; Blainey, S. A Carbon Footprint Analysis of Railway Sleepers in the United Kingdom. *Transportation Research Part D: Transport and Environment* **2020**, *81*, doi:10.1016/j.trd.2020.102285.
3200. Jacobs, M.; Hilmers, T.; Leroy, B.M.L.; Lemme, H.; Kienlein, S.; Müller, J.; Weisser, W.W.; Pretzsch, H. Assessment of Defoliation and Subsequent Growth Losses Caused by *Lymantria dispar* Using Terrestrial Laser Scanning (TLS). *Trees - Structure and Function* **2022**, *36*, 819–834, doi:10.1007/s00468-021-02255-z.
3201. Munjanja, B.K.; Naudé, Y.; Forbes, P.B.C. A Review of Sampling Approaches to Off-Target Pesticide Deposition. *Trends in Environmental Analytical Chemistry* **2020**,

- 25, doi:10.1016/j.teac.2019.e00075.
3202. Zhou, Z.; Wu, H.; Ding, T.; Xia, Q. Nonradial Directional Distance Function for Measuring the Environmental Efficiency of the Chinese Iron and Steel Industry. *Tropical Conservation Science* **2019**, *12*, doi:10.1177/1940082919853755.
3203. Skufina, T.P.; Samarina, V.P.; Samarin, A.V. CONCERNING PROCESSES OF DECARBONIZATION OF PRODUCTION AND PROSPECTS FOR THE ARCTIC AS A CARBON-NEUTRAL TERRITORY. *Ugol* **2022**, 54–58, doi:10.18796/0041-5790-2022-6-54-58.
3204. Feng, K.; Wang, C.; Mo, R.; Hu, J.; Li, S. Interaction between Particles and Bubbles Driven by Ultrasound: Acoustic Radiation Force on an Elastic Particle Immersed in the Ideal Fluid near a Bubble. *Ultrasonics Sonochemistry* **2020**, *67*, doi:10.1016/j.ultsonch.2020.105166.
3205. Maile, N.C.; Shinde, S.K.; Koli, R.R.; Fulari, A.V.; Kim, D.Y.; Fulari, V.J. Effect of Different Electrolytes and Deposition Time on the Supercapacitor Properties of Nanoflake-like Co(OH)<sub>2</sub> Electrodes. *Ultrasonics Sonochemistry* **2019**, *51*, 49–57, doi:10.1016/j.ultsonch.2018.09.003.
3206. Petkovšek, M.; Hočevár, M.; Gregorčič, P. Surface Functionalization by Nanosecond-Laser Texturing for Controlling Hydrodynamic Cavitation Dynamics. *Ultrasonics Sonochemistry* **2020**, *67*, doi:10.1016/j.ultsonch.2020.105126.
3207. Rajput, A.; Ramkumar, J.; Mondal, K. Effect of Pearlitic Morphology with Varying Fineness on the Cavitation Erosion Behavior of Eutectoid Rail Steel. *Ultrasonics Sonochemistry* **2021**, *71*, doi:10.1016/j.ultsonch.2020.105399.
3208. Van Tuyen, T.; Van Manh, D.; Minh, N.T.; Doan, P.T.; Tap, V.H.; Viet, T.M. STUDY ON THE RECYCLE OF STEEL SLAG AS AN ADSORBENT FOR COD REMOVAL IN PULP MILL WASTEWATER. *Vietnam Journal of Science and Technology* **2022**, *60*, 675–690, doi:10.15625/2525-2518/16533.
3209. Abdollahnejad, Z.; Mastali, M.; Wille, K.; Maguire, M.; Rahim, F.; Kinnunen, P.; Illikainen, M. Effects of Using Different Co-Binders and Fibers on Mechanical and Durability Performances of Alkali-Activated Soapstone Binders (AAS). *Waste and Biomass Valorization* **2022**, *13*, 2375–2397, doi:10.1007/s12649-021-01622-8.
3210. Ali, A.; Kio, P.; Alvarado, J.; Wang, Y. Symbiotic Circularity in Buildings: An Alternative Path for Valorizing Sheet Metal Waste Stream as Metal Building Facades. *Waste and Biomass Valorization* **2020**, *11*, 7127–7145, doi:10.1007/s12649-020-01060-y.
3211. Bendikiene, R.; Baltusnikas, A.; Ciuplys, A.; Lukosiute, I.; Juzenas, K.; Kalpokaite-Dickuviene, R.; Sertvytis, R.; Denafas, J. Utilization of Industrial Solar Cells' Scrap as the Base Material to Form Coatings. *Waste and Biomass Valorization* **2021**, *12*, 2757–2767, doi:10.1007/s12649-020-01153-8.
3212. Chung, L.L.P.; Wong, Y.C.; Arulrajah, A. The Application of Spent Coffee Grounds and Tea Wastes as Additives in Alkali-Activated Bricks. *Waste and Biomass Valorization* **2021**, *12*, 6273–6291, doi:10.1007/s12649-021-01453-7.
3213. Liptai, P.; Dolník, B.; Briančin, J.; Havlik, T. Hydrometallurgical Recycling of

- Electric Arc Furnace Dust: Application Possibilities of ZnO Product for the Manufacture of Varistors in the Electrotechnical Industry. *Waste and Biomass Valorization* **2020**, *11*, 4419–4428, doi:10.1007/s12649-019-00722-w.
3214. Mandal, S.; Prasanna Kumar, G.V.; Bhattacharya, T.K.; Tanna, H.R.; Jena, P.C. Briquetting of Pine Needles (*Pinus Roxburgii*) and Their Physical, Handling and Combustion Properties. *Waste and Biomass Valorization* **2019**, *10*, 2415–2424, doi:10.1007/s12649-018-0239-4.
3215. Menad, N.; Kana, N.; Kanari, N.; Pereira, F.; Seron, A. Process for Enhancing the Valuable Metal Recovery from “Electric Arc Furnace” (EAF) Slags. *Waste and Biomass Valorization* **2021**, *12*, 5187–5200, doi:10.1007/s12649-021-01357-6.
3216. Piemonti, A.; Conforti, A.; Cominoli, L.; Luciano, A.; Plizzari, G.; Sorlini, S. Exploring the Potential for Steel Slags Valorisation in an Industrial Symbiosis Perspective at Meso-Scale Level. *Waste and Biomass Valorization* **2022**, doi:10.1007/s12649-022-01940-5.
3217. Poravou, C.A.; Tsongidis, N.I.; Lekkios, C.; Zacharopoulou, V.A.; Konstandopoulos, A.G. Valorization of Plastic Waste: A Lab-Scale Approach with the Aid of Solar Hydrothermal Liquefaction Technology. *Waste and Biomass Valorization* **2022**, *13*, 3835–3844, doi:10.1007/s12649-022-01837-3.
3218. Rahbar Shiraz, S.; Jalili, B.; Bahmanyar, M.A. Amendment of Vermicompost by Phosphate Rock, Steel Dust, and *Halothiobacillus Neapolitanus*. *Waste and Biomass Valorization* **2020**, *11*, 4207–4213, doi:10.1007/s12649-019-00740-8.
3219. van Deventer, J.S.J.; White, C.E.; Myers, R.J. A Roadmap for Production of Cement and Concrete with Low-CO<sub>2</sub> Emissions. *Waste and Biomass Valorization* **2021**, *12*, 4745–4775, doi:10.1007/s12649-020-01180-5.
3220. Varia, J.C.; Snellings, R.; Hennebel, T. Sustainable Metal Recovery from Secondary Resources: Screening and Kinetic Studies Using Analogue Heterotrophic Metabolites. *Waste and Biomass Valorization* **2021**, *12*, 2703–2721, doi:10.1007/s12649-020-01161-8.
3221. Hu, Y.; Zhao, L.; Guo, Q.; Li, L.; Wang, Y.; Ye, Y.; Mao, F.; Tian, W. Quantification and Distribution of Extractable Metals of MSWI Bottom Ash in View of Its Valorization in China. *Waste Disposal and Sustainable Energy* **2022**, doi:10.1007/s42768-022-00111-5.
3222. Tota-Maharaj, K.; McMahon, A. Resource and Waste Quantification Scenarios for Wind Turbine Decommissioning in the United Kingdom. *Waste Disposal and Sustainable Energy* **2021**, *3*, 117–144, doi:10.1007/s42768-020-00057-6.
3223. Kurka, V.; Jonšta, P.; Kotásek, O.; Mlčoch, P. Reducing the Content of Zinc in Metallurgical Waste in a Rotary Kiln. *Waste Forum* **2021**, 78–85.
3224. Wolfová, M.; Eštoková, A.; Ondová, M. Environmental Properties of Wooden Shelter: A Comparison of Three Waste Management Scenarios. *Waste Forum* **2019**, 246–253.
3225. Brooks, L.; Gaustad, G.; Gesing, A.; Mortvedt, T.; Freire, F. Ferrous and Non-Ferrous Recycling: Challenges and Potential Technology Solutions. *Waste*

- Management* **2019**, *85*, 519–528, doi:10.1016/j.wasman.2018.12.043.
3226. Cruz Rios, F.; Grau, D.; Chong, W.K. Reusing Exterior Wall Framing Systems: A Cradle-to-Cradle Comparative Life Cycle Assessment. *Waste Management* **2019**, *94*, 120–135, doi:10.1016/j.wasman.2019.05.040.
3227. Devi, M.M.; Sunaina; Singh, H.; Kaur, K.; Gupta, A.; das, A.; Nishanthi, S.T.; Bera, C.; Ganguli, A.K.; Jha, M. New Approach for the Transformation of Metallic Waste into Nanostructured Fe<sub>3</sub>O<sub>4</sub> and SnO<sub>2</sub>-Fe<sub>3</sub>O<sub>4</sub> Heterostructure and Their Application in Treatment of Organic Pollutant. *Waste Management* **2019**, *87*, 719–730, doi:10.1016/j.wasman.2019.03.007.
3228. Huber, F. Modelling of Material Recovery from Waste Incineration Bottom Ash. *Waste Management* **2020**, *105*, 61–72, doi:10.1016/j.wasman.2020.01.034.
3229. Kumar, N.; Amritphale, S.S.; Matthews, J.C.; Lynam, J.G.; Alam, S.; Abdulkareem, O.A. Synergistic Utilization of Diverse Industrial Wastes for Reutilization in Steel Production and Their Geopolymerization Potential. *Waste Management* **2021**, *126*, 728–736, doi:10.1016/j.wasman.2021.04.008.
3230. Kurmus, H.; Mohajerani, A. The Toxicity and Valorization Options of Cigarette Butts. *Waste Management* **2020**, *104*, 104–118, doi:10.1016/j.wasman.2020.01.011.
3231. Lee, B.; Lee, S.; Kim, B.; Choi, H. Advanced Characterization of IGCC Slag by Automated SEM-EDS Analysis. *Waste Management* **2020**, *116*, 140–146, doi:10.1016/j.wasman.2020.08.001.
3232. Li, P.-C.; Shih, H.-C.; Ma, H.-W. Applying Probabilistic Material Flow Analysis for Quality Control and Management of Waste Recycling in Steelmaking. *Waste Management* **2022**, *144*, 67–75, doi:10.1016/j.wasman.2022.03.011.
3233. Liu, M.; Chen, X.; Zhang, M.; Lv, X.; Wang, H.; Chen, Z.; Huang, X.; Zhang, X.; Zhang, S. End-of-Life Passenger Vehicles Recycling Decision System in China Based on Dynamic Material Flow Analysis and Life Cycle Assessment. *Waste Management* **2020**, *117*, 81–92, doi:10.1016/j.wasman.2020.08.002.
3234. Lu, J.; Borjigin, S.; Kumagai, S.; Kameda, T.; Saito, Y.; Yoshioka, T. Practical Dechlorination of Polyvinyl Chloride Wastes in NaOH/Ethylene Glycol Using an up-Scale Ball Mill Reactor and Validation by Discrete Element Method Simulations. *Waste Management* **2019**, *99*, 31–41, doi:10.1016/j.wasman.2019.08.034.
3235. Matsumoto, H.; Takaoka, M. The Application of Multiple Advanced Chloride Removal Methods to Synthesized Friedel's Salt and Municipal Solid Waste Incineration Bottom Ash. *Waste Management* **2022**, *141*, 27–34, doi:10.1016/j.wasman.2022.01.029.
3236. Mehr, J.; Haupt, M.; Skutan, S.; Morf, L.; Raka Adrianto, L.; Weibel, G.; Hellweg, S. The Environmental Performance of Enhanced Metal Recovery from Dry Municipal Solid Waste Incineration Bottom Ash. *Waste Management* **2021**, *119*, 330–341, doi:10.1016/j.wasman.2020.09.001.
3237. Muñoz, I.; Soto, A.; Maza, D.; Bayón, F. Life Cycle Assessment of Refractory Waste Management in a Spanish Steel Works. *Waste Management* **2020**, *111*, 1–9, doi:10.1016/j.wasman.2020.05.023.



3238. Petranikova, M.; Tkaczyk, A.H.; Bartl, A.; Amato, A.; Lapkovskis, V.; Tunsu, C. Vanadium Sustainability in the Context of Innovative Recycling and Sourcing Development. *Waste Management* **2020**, *113*, 521–544, doi:10.1016/j.wasman.2020.04.007.
3239. Qin, L.; Gao, X. Recycling of Waste Autoclaved Aerated Concrete Powder in Portland Cement by Accelerated Carbonation. *Waste Management* **2019**, *89*, 254–264, doi:10.1016/j.wasman.2019.04.018.
3240. Ragipani, R.; Bhattacharya, S.; Akkihebbal, S.K. Understanding Dissolution Characteristics of Steel Slag for Resource Recovery. *Waste Management* **2020**, *117*, 179–187, doi:10.1016/j.wasman.2020.08.008.
3241. Reddy, K.R.; Chetri, J.K.; Kumar, G.; Grubb, D.G. Effect of Basic Oxygen Furnace Slag Type on Carbon Dioxide Sequestration from Landfill Gas Emissions. *Waste Management* **2019**, *85*, 425–436, doi:10.1016/j.wasman.2019.01.013.
3242. Rosado, L.P.; Vitale, P.; Penteadó, C.S.G.; Arena, U. Life Cycle Assessment of Construction and Demolition Waste Management in a Large Area of São Paulo State, Brazil. *Waste Management* **2019**, *85*, 477–489, doi:10.1016/j.wasman.2019.01.011.
3243. Sayehi, M.; Tounsi, H.; Garbarino, G.; Riani, P.; Busca, G. Reutilization of Silicon- and Aluminum- Containing Wastes in the Perspective of the Preparation of SiO<sub>2</sub>-Al<sub>2</sub>O<sub>3</sub> Based Porous Materials for Adsorbents and Catalysts. *Waste Management* **2020**, *103*, 146–158, doi:10.1016/j.wasman.2019.12.013.
3244. (Thanos) Bourtsalas, A.C.; Themelis, N.J. Major Sources of Mercury Emissions to the Atmosphere: The U.S. Case. *Waste Management* **2019**, *85*, 90–94, doi:10.1016/j.wasman.2018.12.008.
3245. Townsend, T.G.; Ingwersen, W.W.; Niblick, B.; Jain, P.; Wally, J. CDDPath: A Method for Quantifying the Loss and Recovery of Construction and Demolition Debris in the United States. *Waste Management* **2019**, *84*, 302–309, doi:10.1016/j.wasman.2018.11.048.
3246. Wuschke, L.; Jäckel, H.-G.; Leißner, T.; Peuker, U.A. Crushing of Large Li-Ion Battery Cells. *Waste Management* **2019**, *85*, 317–326, doi:10.1016/j.wasman.2018.12.042.
3247. Ye, L.; Peng, Z.; Ye, Q.; Wang, L.; Augustine, R.; Perez, M.; Liu, Y.; Liu, M.; Tang, H.; Rao, M.; et al. Toward Environmentally Friendly Direct Reduced Iron Production: A Novel Route of Comprehensive Utilization of Blast Furnace Dust and Electric Arc Furnace Dust. *Waste Management* **2021**, *135*, 389–396, doi:10.1016/j.wasman.2021.08.045.
3248. Zhang, C.; Ma, Q.; Cai, M.; Zhao, Z.; Xie, H.; Ning, Z.; Wang, D.; Yin, H. Recovery of Porous Silicon from Waste Crystalline Silicon Solar Panels for High-Performance Lithium-Ion Battery Anodes. *Waste Management* **2021**, *135*, 182–189, doi:10.1016/j.wasman.2021.08.037.
3249. Baidya, R.; Kumar Ghosh, S. Disposal of Hazardous Industrial Waste in Cement Kiln – A Pilot Study of Acid Tar Sludge. *Waste Management and Research* **2022**, *40*,

- 294–305, doi:10.1177/0734242X211055544.
3250. Baidya, R.; Kumar Ghosh, S.; Parlikar, U.V. Blast Furnace Flue Dust Co-Processing in Cement Kiln – A Pilot Study. *Waste Management and Research* **2019**, *37*, 261–267, doi:10.1177/0734242X18816791.
3251. Cline, C.; Anshassi, M.; Laux, S.; Townsend, T. Characterizing Municipal Solid Waste Component Densities for Use in Landfill Air Space Estimates. *Waste Management and Research* **2020**, *38*, 673–679, doi:10.1177/0734242X19895324.
3252. Ebin, B.; Petranikova, M.; Steenari, B.-M.; Ekberg, C. Recovery of Industrial Valuable Metals from Household Battery Waste. *Waste Management and Research* **2019**, *37*, 168–175, doi:10.1177/0734242X18815966.
3253. Gumedde, J.I.; Hlangothi, B.G.; Woolard, C.D.; Hlangothi, S.P. Organic Chemical Devulcanization of Rubber Vulcanizates in Supercritical Carbon Dioxide and Associated Less Eco-Unfriendly Approaches: A Review. *Waste Management and Research* **2022**, *40*, 490–503, doi:10.1177/0734242X211008515.
3254. Karamoutsos, S.; Tzeveleku, T.; Christogerou, A.; Grilla, E.; Gypakis, A.; Pérez Villarejo, L.; Mantzavinos, D.; Angelopoulos, G.N. On the Industrial Symbiosis of Alumina and Iron/Steel Production: Suitability of Ferroalumina as Raw Material in Iron and Steel Making. *Waste Management and Research* **2021**, *39*, 1270–1276, doi:10.1177/0734242X21991906.
3255. Kolaventi, S.S.; Tezeswi, T.P.; Siva Kumar, M.V.N. An Assessment of Construction Waste Management in India: A Statistical Approach. *Waste Management and Research* **2019**, doi:10.1177/0734242X19867754.
3256. La Scalia, G.; La Fata, C.M.; Certa, A.; Micale, R. A Multifunctional Plant for a Sustainable Reuse of Marble Waste toward Circular Economy. *Waste Management and Research* **2022**, *40*, 806–813, doi:10.1177/0734242X211029161.
3257. Mavroulidou, M.; Shah, S. Alkali-Activated Slag Concrete with Paper Industry Waste. *Waste Management and Research* **2021**, *39*, 466–472, doi:10.1177/0734242X20983890.
3258. Pfandl, K.; Küppers, B.; Scheiber, S.; Stockinger, G.; Holzer, J.; Pomberger, R.; Antrekowitsch, H.; Vollprecht, D. X-Ray Fluorescence Sorting of Non-Ferrous Metal Fractions from Municipal Solid Waste Incineration Bottom Ash Processing Depending on Particle Surface Properties. *Waste Management and Research* **2020**, *38*, 111–121, doi:10.1177/0734242X19879225.
3259. Rakhshan, K.; Morel, J.; Alaka, H.; Charef, R. Components Reuse in the Building Sector - A Systematic Review. *Waste Management and Research* **2020**, *38*, 347–370, doi:10.1177/0734242X20910463.
3260. Reddy, K.R.; Gopakumar, A.; Rai, R.K.; Kumar, G.; Chetri, J.K.; Grubb, D.G. Effect of Basic Oxygen Furnace Slag Particle Size on Sequestration of Carbon Dioxide from Landfill Gas. *Waste Management and Research* **2019**, *37*, 469–477, doi:10.1177/0734242X18823948.
3261. Šerešová, M.; Polák, M.; Kočí, V. Environmental Performance of Collection Boxes for End of Life Mobile Phones. *Waste Management and Research* **2019**, *37*, 851–859,

- doi:10.1177/0734242X19857468.
3262. Singh, N.; Tang, Y.; Li, J. Uncovering Material Flow Analysis of Waste Cathode Ray Tubes Television in China. *Waste Management and Research* **2019**, *37*, 1170–1177, doi:10.1177/0734242X19871600.
3263. Tennakoon, G.; Rameezdeen, R.; Chileshe, N. Diverting Demolition Waste toward Secondary Markets through Integrated Reverse Logistics Supply Chains: A Systematic Literature Review. *Waste Management and Research* **2022**, *40*, 274–293, doi:10.1177/0734242X211021478.
3264. Vilventhan, A.; Ram, V.G.; Sugumaran, S. Value Stream Mapping for Identification and Assessment of Material Waste in Construction: A Case Study. *Waste Management and Research* **2019**, *37*, 815–825, doi:10.1177/0734242X19855429.
3265. Yoon, C.-W.; Yoon, Y.-S.; Hong, S.-Y.; Jeon, T.-W.; Shin, S.-K. Hazardous Characteristics of Dust Waste from Metal Manufacturing Industries in South Korea. *Waste Management and Research* **2021**, *39*, 1471–1479, doi:10.1177/0734242X21996552.
3266. Bertulesi, M.; Bignami, D.F.; Boschini, I.; Chiarini, A.; Ferrario, M.; Mazzon, N.; Menduni, G.; Morosi, J.; Zambrini, F. Conceptualization and Prototype of an Anti-Erosion Sensing Revetment for Levee Monitoring: Experimental Tests and Numerical Modeling. *Water (Switzerland)* **2020**, *12*, 1–16, doi:10.3390/w12113025.
3267. Choi, J.-H.; Jun, K.-W.; Jang, C.-D. Bed-Load Collision Sound Filtering through Separation of Pipe Hydrophone Frequency Bands. *Water (Switzerland)* **2020**, *12*, doi:10.3390/W12071875.
3268. Claveau-Mallet, D.; Comeau, Y. Chemical Clogging and Evolution of Head Losses in Steel Slag Filters Used for Phosphorus Removal. *Water (Switzerland)* **2020**, *12*, doi:10.3390/W12061517.
3269. Forin, S.; Gossmann, J.; Weis, C.; Thylmann, D.; Bunsen, J.; Berger, M.; Finkbeiner, M. Organizational Water Footprint to Support Decision Making: A Case Study for a German Technological Solutions Provider for the Plumbing Industry. *Water (Switzerland)* **2020**, *12*, doi:10.3390/w12030847.
3270. Galarce, C.; Fischer, D.; Diez, B.; Vargas, I.; Pizarro, G. Dynamics of Biocorrosion in Copper Pipes under Actual Drinking Water Conditions. *Water (Switzerland)* **2020**, *12*, doi:10.3390/w12041036.
3271. Giglioli, S.; Colombo, L.; Contestabile, P.; Musco, L.; Armiento, G.; Somma, R.; Vicinanza, D.; Azzellino, A. Source Apportionment Assessment of Marine Sediment Contamination in a Post-Industrial Area (Bagnoli, Naples). *Water (Switzerland)* **2020**, *12*, doi:10.3390/W12082181.
3272. Grajales-Mesa, S.J.; Malina, G. Pilot-Scale Evaluation of a Permeable Reactive Barrier with Compost and Brown Coal to Treat Groundwater Contaminated with Trichloroethylene. *Water (Switzerland)* **2019**, *11*, doi:10.3390/w11091922.
3273. Hellgren, R.; Enzell, J.; Ansell, A.; Nordstrom, E.; Malm, R. Estimating the Ice Loads on Concrete Dams Based on Their Structural Response. *Water (Switzerland)* **2022**, *14*, doi:10.3390/w14040597.

3274. Kang, S.-W.; Ahn, K.-H. The Influence of Organic Matter Origin on the Chlorine Bulk Decay Coefficient in Reclaimed Water. *Water (Switzerland)* **2022**, *14*, doi:10.3390/w14050765.
3275. Kim, J.; Eom, J.; Lee, S.; Lee, Y.-S.; Kim, H.-S. Monitoring of the Operating Membrane Condition Using Pzt Based Emi of External Steel Pipe. *Water (Switzerland)* **2021**, *13*, doi:10.3390/w13233407.
3276. Li, Z.; Wang, L.; Shen, J.; Ma, Q.; Du, S. A Method for Assessing Flood Vulnerability Based on Vulnerability Curves and Online Data of Residential Buildings-A Case Study of Shanghai. *Water (Switzerland)* **2022**, *14*, doi:10.3390/w14182840.
3277. Nde-Tchoupe, A.; Hu, R.; Gwenzi, W.; Nassi, A.; Noubactep, C. Characterizing the Reactivity of Metallic Iron for Water Treatment: H(2)Evolution in H(2)SO(4)and Uranium Removal Efficiency. *Water (Switzerland)* **2020**, *12*, doi:10.3390/w12061523.
3278. Ociepa, E.; Mrowiec, M.; Deska, I. Analysis of Water Losses and Assessment of Initiatives Aimed at Their Reduction in Selected Water Supply Systems. *Water (Switzerland)* **2019**, *11*, doi:10.3390/w11051037.
3279. Rookesh, T.; Samaei, M.R.; Yousefinejad, S.; Hashemi, H.; Derakhshan, Z.; Abbasi, F.; Jalili, M.; Giannakis, S.; Bilal, M. Investigating the Electrocoagulation Treatment of Landfill Leachate by Iron/Graphite Electrodes: Process Parameters and Efficacy Assessment. *Water (Switzerland)* **2022**, *14*, doi:10.3390/w14020205.
3280. Skoczko, I.; Szatyłowicz, E. Treatment Method Assessment of the Impact on the Corrosivity and Aggressiveness for the Boiler Feed Water. *Water (Switzerland)* **2019**, *11*, doi:10.3390/w11101965.
3281. Wang, L.; Liu, C.; Fan, X.; Yang, C.; Zhou, X.; Guo, Z. Methane Promotion of Waste Sludge Anaerobic Digestion: Effect of Typical Metal Meshes on Community Evolution and Electron Transfer. *Water (Switzerland)* **2022**, *14*, doi:10.3390/w14193129.
3282. Yang, C.; Hou, S.; Xu, J.; Zhang, Y.; Zheng, Y.; Fernandez-Rodriguez, E.; Zhou, D. Multicomponentwater Effects on Rotating Machines Disk Erosion. *Water (Switzerland)* **2020**, *12*, doi:10.3390/w12030757.
3283. Zagretidinov, A.; Ziganshin, S.; Vankov, Y.; Izmailova, E.; Kondratiev, A. Determination of Pipeline Leaks Based on the Analysis the Hurst Exponent of Acoustic Signals. *Water (Switzerland)* **2022**, *14*, doi:10.3390/w14193190.
3284. Zhang, J.; Ma, L. Environmental Sustainability Assessment of a New Sewage Treatment Plant in China Based on Infrastructure Construction and Operation Phases Emery Analysis. *Water (Switzerland)* **2020**, *12*, doi:10.3390/w12020484.
3285. Rukobratsky, N.I.; Baruzdin, R.E. Tertiary Treatment of Cold and Hot Water in Apartment Houses and Clusters of St. Petersburg. *Water and Ecology* **2019**, *24*, 54–63, doi:10.23968/2305-3488.2019.24.4.54-63.
3286. Sandimirov, S.S. Influence of the Service Water System at the Kola Nuclear Power Plant on the Heavy Metals Content in Lake Imandra. *Water and Ecology* **2020**, *25*,

- 93–103, doi:10.23968/2305-3488.2020.25.2.93-103.
3287. Kumar, M. Utilisation Potential of Hydrogen in Iron and Steel Making in India. *Water and Energy International* **2021**, *64r*, 47–49.
3288. Majour, H.; Sedrati, N. Impact of Solid Waste from Siderurgical Complex on Water Resources: Case of the Municipality of Sidi Amar. Annaba (North East Algeria). *Water and Energy International* **2020**, *63r*, 60–66.
3289. Sebastian, G.; Manohar, V.H. Large Capacity Turbo-Generators in Nuclear Power Plants Technologies and Operational Experience. *Water and Energy International* **2019**, *62r*, 24–27.
3290. Caicedo-Ramirez, A.; Laroco, N.; Bilgin, A.A.; Shiokari, S.; Grubb, D.G.; Hernandez, M. Engineered Addition of Slag Fines for the Sequestration of Phosphate and Sulfide during Mesophilic Anaerobic Digestion. *Water Environment Research* **2020**, *92*, 455–464, doi:10.1002/wer.1208.
3291. Garg, V.K.; Tanta, A.; Lal Srivastav, A.; Tiwari, M.K.; Sharma, A.; Kanwar, V.S. Water Quality Assessment Using Synchrotron-Based TXRF. *Water Environment Research* **2022**, *94*, doi:10.1002/wer.10759.
3292. Oveisy, N.; Rafiee, M.; Rahmatpour, A.; Nejad, A.S.; Hashemi, M.; Eslami, A. Occurrence, Identification, and Discharge of Microplastics from Effluent and Sludge of the Largest WWTP in Iran—South of Tehran. *Water Environment Research* **2022**, *94*, doi:10.1002/wer.10765.
3293. Abdel-Shafy, H.I.; Morsy, R.M.M.; Hewehy, M.A.I.; Razeq, T.M.A.; Hamid, M.M.A. Treatment of Industrial Electroplating Wastewater for Metals Removal via Electrocoagulation Continuous Flow Reactors. *Water Practice and Technology* **2022**, *17*, doi:10.2166/wpt.2022.001.
3294. Azadgoleh, M.; Mohammadi, M.; Ghodrati, A.; Sharifi, S.; Palizban, S.; Ahmadi, A.; Vahidi, E.; Ayar, P. Characterization of Contaminant Leaching from Asphalt Pavements: A Critical Review of Measurement Methods, Reclaimed Asphalt Pavement, Porous Asphalt, and Waste-Modified Asphalt Mixtures. *Water Research* **2022**, *219*, doi:10.1016/j.watres.2022.118584.
3295. Bell, A.M.; Baier, R.; Kocher, B.; Reifferscheid, G.; Buchinger, S.; Ternes, T. Ecotoxicological Characterization of Emissions from Steel Coatings in Contact with Water. *Water Research* **2020**, *173*, doi:10.1016/j.watres.2020.115525.
3296. Chen, L.; Li, J.; Tang, Y.; Wang, S.; Lu, X.; Cheng, Z.; Zhang, X.; Wu, P.; Chang, X.; Xia, Y. Typhoon-Induced Turbulence Redistributed Microplastics in Coastal Areas and Reformed Plasticsphere Community. *Water Research* **2021**, *204*, doi:10.1016/j.watres.2021.117580.
3297. Douterelo, I.; Dutilh, B.; Calero, C.; Rosales, E.; Martin, K.; Husband, S. Impact of Phosphate Dosing on the Microbial Ecology of Drinking Water Distribution Systems: Fieldwork Studies in Chlorinated Networks. *Water Research* **2020**, *187*, doi:10.1016/j.watres.2020.116416.
3298. Escobedo, E.; Oh, J.-A.; Cho, K.; Chang, Y.-S. Activation of Hydrogen Peroxide, Persulfate, and Free Chlorine by Steel Anode for Treatment of Municipal and

- Livestock Wastewater: Unravelling the Role of Oxidants Speciation. *Water Research* **2022**, *216*, doi:10.1016/j.watres.2022.118305.
3299. Haxthausen, K.A.V.; Lu, X.; Zhang, Y.; Gosewinkel, U.; Petersen, D.G.; Marzocchi, U.; Brock, A.L.; Trapp, S. Novel Method to Immobilize Phosphate in Lakes Using Sediment Microbial Fuel Cells. *Water Research* **2021**, *198*, doi:10.1016/j.watres.2021.117108.
3300. Li, S.; Qu, Q.; Li, L.; Xia, K.; Li, Y.; Zhu, T. Bacillus Cereus S-EPS as a Dual Bio-Functional Corrosion and Scale Inhibitor in Artificial Seawater. *Water Research* **2019**, *166*, doi:10.1016/j.watres.2019.115094.
3301. Müller, S.; Behrends, T.; van Genuchten, C.M. Sustaining Efficient Production of Aqueous Iron during Repeated Operation of Fe(0)-Electrocoagulation. *Water Research* **2019**, *155*, 455–464, doi:10.1016/j.watres.2018.11.060.
3302. Tang, C.; Rygaard, M.; Rosshaug, P.S.; Kristensen, J.B.; Albrechtsen, H.-J. Evaluation and Comparison of Centralized Drinking Water Softening Technologies: Effects on Water Quality Indicators. *Water Research* **2021**, *203*, doi:10.1016/j.watres.2021.117439.
3303. Vatankhah, H.; Tajdini, B.; Milstead, R.P.; Clevenger, E.; Murray, C.; Knappe, D.; Remucal, C.K.; Bellona, C. Impact of Ozone-Biologically Active Filtration on the Breakthrough of Perfluoroalkyl Acids during Granular Activated Carbon Treatment of Municipal Wastewater Effluent. *Water Research* **2022**, *223*, doi:10.1016/j.watres.2022.118988.
3304. Wood, J.; Grov, J.; Marcellin, E.; Heffernan, J.; Hu, S.; Yuan, Z.; Viridis, B. Strategies to Improve Viability of a Circular Carbon Bioeconomy-A Techno-Economic Review of Microbial Electrosynthesis and Gas Fermentation. *Water Research* **2021**, *201*, doi:10.1016/j.watres.2021.117306.
3305. Yao, Y.; Dang, X.; Qiao, X.; Li, R.; Chen, J.; Huang, Z.; Gong, Y.-K. Crosslinked Biomimetic Coating Modified Stainless-Steel-Mesh Enables Completely Self-Cleaning Separation of Crude Oil/Water Mixtures. *Water Research* **2022**, *224*, doi:10.1016/j.watres.2022.119052.
3306. Zhang, H.; Zhao, L.; Liu, D.; Wang, J.; Zhang, X.; Chen, C. Early Period Corrosion and Scaling Characteristics of Ductile Iron Pipe for Ground Water Supply with Sodium Hypochlorite Disinfection. *Water Research* **2020**, *176*, doi:10.1016/j.watres.2020.115742.
3307. Zhang, X.; Xia, S.; Ye, Y.; Wang, H. Opportunistic Pathogens Exhibit Distinct Growth Dynamics in Rainwater and Tap Water Storage Systems. *Water Research* **2021**, *204*, doi:10.1016/j.watres.2021.117581.
3308. Zhong, H.; Shi, Z.; Jiang, G.; Yuan, Z. Decreasing Microbially Influenced Metal Corrosion Using Free Nitrous Acid in a Simulated Water Injection System. *Water Research* **2020**, *172*, doi:10.1016/j.watres.2020.115470.
3309. Zhong, H.; Shi, Z.; Jiang, G.; Yuan, Z. Synergistic Inhibitory Effects of Free Nitrous Acid and Imidazoline Derivative on Metal Corrosion in a Simulated Water Injection System. *Water Research* **2020**, *184*, doi:10.1016/j.watres.2020.116122.

3310. Wolff, S.; Kerpen, J.; Prediger, J.; Barkmann, L.; Müller, L. Determination of the Microplastics Emission in the Effluent of a Municipal Waste Water Treatment Plant Using Raman Microspectroscopy. *Water Research X* **2019**, *2*, doi:10.1016/j.wroa.2018.100014.
3311. Xu, X.; Cui, Y.; Wang, Z.; Zhang, H.; Li, C.; Yu, K. Water Quality Deterioration of Reclaimed Water Produced by Reverse Osmosis Process in Large Pilot-Scale Distribution Systems of Different Pipe Materials. *Water Reuse* **2021**, *11*, 610–620, doi:10.2166/wrd.2021.042.
3312. Arkan-Ozdemir, S.; Cansever, N.; Ilhan-Sungur, E. Impact of Commonly Used Ag-Cu Ion Doses on *Desulfovibrio* Sp.: Growth and Microbiologically Induced Corrosion against Stainless Steel. *Water Science and Technology* **2020**, *82*, 940–953, doi:10.2166/wst.2020.396.
3313. Benzing, S.; Couceiro, F.; Barnett, S.; Williams, J.; Pearce, P.; Stanford, C. Impact of Hydraulic Retention Time on Phosphorus Removal from Wastewater Using Reactive Media. *Water Science and Technology* **2020**, *82*, 2920–2928, doi:10.2166/wst.2020.526.
3314. Brunet, F.; Tisserand, D.; Lanson, M.; Malvoisin, B.; Bertrand, M.; Bonnaud, C. Real-Time Monitoring of Aqueous Hg<sup>2+</sup> Reduction Dynamics by Magnetite/Iron Metal Composite Powders Synthesized Hydrothermally. *Water Science and Technology* **2022**, *86*, 596–609, doi:10.2166/WST.2022.210.
3315. Carucci, A.; Erby, G.; Puggioni, G.; Spiga, D.; Frugoni, F.; Milia, S. Ammonium Recovery from Agro-Industrial Digestate Using Bioelectrochemical Systems. *Water Science and Technology* **2022**, *85*, 2432–2441, doi:10.2166/wst.2022.113.
3316. Dewalkar, S.V.; Shastri, S.S. Environmental and Economic Assessment of Proposed On-Site Wastewater Management System in Multi-Storey Residential Building. *Water Science and Technology* **2020**, *82*, 3003–3016, doi:10.2166/wst.2020.548.
3317. El Naker, N.A.; Sallam, A.M.; El-Sayed, E.-S.M.; El Ghandoor, H.; Talaat, M.S.; Yousef, A.F.; Hasan, S.W. A Conceptual Framework Modeling of Functional Microbial Communities in Wastewater Treatment Electrobioreactors. *Water Science and Technology* **2020**, *82*, 3047–3061, doi:10.2166/wst.2020.553.
3318. Lanfranconi, I.; Ceretta, M.B.; Bertola, N.; Wolski, E.A.; Durruty, I. Textile Dyeing Wastewater Treatment by *Penicillium Chrysogenum*: Design of a Sustainable Process. *Water Science and Technology* **2022**, *86*, 292–301, doi:10.2166/wst.2022.204.
3319. Lian, J.; Yi, Y.; Zhang, N.; Fang, Z. Effective Degradation of Tetracycline by Magnetic Palygorskite Synthesized with Different Dosages of NaOH. *Water Science and Technology* **2020**, *81*, 1452–1460, doi:10.2166/wst.2020.194.
3320. Mohamed, M.E.; Abd-El-Nabey, B.A. Fabrication of Durable Superhydrophobic/Oleophilic Cotton Fabric for Highly Efficient Oil/Water Separation. *Water Science and Technology* **2021**, *83*, 90–99, doi:10.2166/wst.2020.562.
3321. Sanchis, S.; Gali, D.; Sala, V.; Gomez, P.; Pinedo, J.; Donato, J.; Berlanga, J.G.; Garcia-Montaña, J. Advanced Hybrid Electro-Oxidation & O<sub>3</sub> Technology for

- Water Reuse in the Fruit and Vegetable Process Industry. *Water Science and Technology* **2021**, *84*, 1159–1169, doi:10.2166/wst.2021.297.
3322. Villamar, C.A.; Salazar, K.; Montenegro-Rosero, K.; Huaraca, L.; Da Conceicao, K.C. Preventive Strategies for Reuse and Recycling of Wastewater within the HDG Production. *Water Science and Technology* **2022**, *85*, 265–278, doi:10.2166/wst.2021.621.
3323. Drennan, D.M.; Koshy, R.E.; Gent, D.B.; Schaefer, C.E. Electrochemical Treatment for Greywater Reuse: Effects of Cell Configuration on COD Reduction and Disinfection Byproduct Formation and Removal. *Water Science and Technology: Water Supply* **2019**, *19*, 891–898, doi:10.2166/ws.2018.138.
3324. Fard, M.A.; Barkdoll, B.D. Sustainable Life-Cycle Assessment of Mixing Approaches in Water Storage Tanks. *Water Science and Technology: Water Supply* **2021**, *21*, 553–566, doi:10.2166/ws.2020.346.
3325. Chen, W.; Chen, J. Formation and Prevention of Pipe Scale in Water Supply Pipelines with Anti-Corrosion Lining. *Water Supply* **2022**, *22*, 4006–4014, doi:10.2166/ws.2022.030.
3326. Albiero, G.; Santucci, L.; Carol, E. Assessment of Acid Sulfate Drainage in an Environmental Liability Associated with an Ancient Sulfuric Acid Industry in a Sector of the Rio de La Plata Coastal Plain: Impacts On Soil And Water Quality. *Water, Air, and Soil Pollution* **2021**, *232*, doi:10.1007/s11270-021-05107-1.
3327. Balidakis, A.; Matsi, T. Boron Adsorption-Desorption by Steelmaking Slag for Boron Removal from Irrigation Waters. *Water, Air, and Soil Pollution* **2020**, *231*, doi:10.1007/s11270-020-04779-5.
3328. da Silva, L.C.; de Freitas-Silva, L.; Rocha, D.I.; da Silva Castro Pereira, J.; de Freitas Assis, D.E. Leaf Morpho-Anatomical Structure Determines Differential Response Among Restinga Species Exposed to Emissions from an Iron Ore Pelletizing Plant. *Water, Air, and Soil Pollution* **2020**, *231*, doi:10.1007/s11270-020-04533-x.
3329. El-Gayar, D.A.; Khodary, M.A.; Abdel-Aziz, M.H.; Khalil, M.F. Effect of Disk Skimmer Material and Oil Viscosity on Oil Spill Recovery. *Water, Air, and Soil Pollution* **2021**, *232*, doi:10.1007/s11270-021-05150-y.
3330. Gao, S.; Chen, J.; Huang, G. Process Optimization of Steel Pickling Waste Liquor Treated by Electrochemical Synthesis of Fe<sub>3</sub>O<sub>4</sub>. *Water, Air, and Soil Pollution* **2022**, *233*, doi:10.1007/s11270-022-05835-y.
3331. Hafızoğlu, N.; Sahin, L.; Ganioglu, E.; Toklu Alıçlı, B. Radiotoxic <sup>210</sup>Po in Some Marine Species of the Marmara Sea (Tekirdağ) and Investigation of Chemical Yield of Various Metals Used in the Spontaneous Deposition Method. *Water, Air, and Soil Pollution* **2022**, *233*, doi:10.1007/s11270-022-05767-7.
3332. Huang, G.; Chen, J.; Gao, S. Treatment of Simulated Steel Pickling Waste Liquor by Electrochemical Synthesis of Fe<sub>3</sub>O<sub>4</sub>. *Water, Air, and Soil Pollution* **2020**, *231*, doi:10.1007/s11270-020-04654-3.
3333. Key, K.; Kulaç, Ş.; Koç, İ.; Sevik, H. Determining the 180-Year Change of Cd, Fe, and Al Concentrations in the Air by Using Annual Rings of *Corylus Colurna* L.



- Water, Air, and Soil Pollution* **2022**, 233, doi:10.1007/s11270-022-05741-3.
3334. Marszałek, A.; Dudziak, M. Application of the Ultrafiltration and Photooxidation Process for the Treatment of Rainwater. *Water, Air, and Soil Pollution* **2021**, 232, doi:10.1007/s11270-021-05465-w.
  3335. Mor, S.; Bhukal, S.; Bishnoi, N.R.; Ravindra, K. Diurnal Variations in the Air Pollutants Concentration over Haryana, India, and Understanding Their Emission Sources. *Water, Air, and Soil Pollution* **2022**, 233, doi:10.1007/s11270-022-05730-6.
  3336. Sakata, M.; Tani, Y. Variations in Atmospheric Concentration and Isotopic Composition of Particulate Boron Related to Emissions from Coal Combustion in Japan. *Water, Air, and Soil Pollution* **2021**, 232, doi:10.1007/s11270-021-05309-7.
  3337. Taiwo, A.M. Estimating the Average Steelworks Particulate Matter Increments Associated with Wind Sectors at a Steel Complex in the UK. *Water, Air, and Soil Pollution* **2022**, 233, doi:10.1007/s11270-022-05814-3.
  3338. Yue, B.; Zhang, X.; Wang, X.; Lian, L.; Gao, W.; Zhang, H.; Hou, S.; Lou, D. A Needle Extraction Device Packed with Molecularly Imprinted Polymer Functionalized Fiber for the Determination of Polycyclic Aromatic Hydrocarbon in Water. *Water, Air, and Soil Pollution* **2022**, 233, doi:10.1007/s11270-021-05471-y.
  3339. Xu, X.; Zhang, F.; Yang, W.; Xue, D.; Wang, L.; Ji, Y. New Testing Technology of Layered Water Injection in Bohai Oilfield. *Well Testing* **2019**, 28, 51–56, doi:10.19680/j.cnki.1004-4388.2019.04.009.
  3340. Momber, A.W.; Möller, T.; Langenkämper, D.; Nattkemper, T.W.; Brün, D. A Digital Twin Concept for the Prescriptive Maintenance of Protective Coating Systems on Wind Turbine Structures. *Wind Engineering* **2022**, 46, 949–971, doi:10.1177/0309524X211060550.
  3341. Gunbeyaz, S.A.; Kurt, R.E.; Baumler, R. A Study on Evaluating the Status of Current Occupational Training in the Ship Recycling Industry in Bangladesh. *WMU Journal of Maritime Affairs* **2019**, 18, 41–59, doi:10.1007/s13437-019-00164-0.
  3342. Auer, G.; Spanka, M.; Hamann, C.; Adam, C. Thermal Zinc Extraction from Steel Mill Dust. *World of Metallurgy - ERZMETALL* **2019**, 72, 27–31.
  3343. Foti, D.; Lerna, M.; Sabbà, M.F.; Vacca, V. On the Collapse Behavior of a Wood Arch Made with Modular Hollow Blocks. *WSEAS Transactions on Environment and Development* **2019**, 15, 279–287.
  3344. Kou, Y.; Pang, Q. Study on Influence of Spinning Process on Microstructure and Mechanical Property of Maraging Steel. *Yuanzineng Kexue Jishu/Atomic Energy Science and Technology* **2022**, 56, 1728–1734, doi:10.7538/yzk.2021.youxian.0622.
  3345. Liu, W.; Yang, H.; Jiang, E.; Huang, Y.; Zhang, G.; Gong, B.; Zhao, Y.; Ma, W. Corrosion Behavior Research of Critical Material for Supercritical Carbon Dioxide Nuclear Power Conversion System. *Yuanzineng Kexue Jishu/Atomic Energy Science and Technology* **2021**, 55, 242–248, doi:10.7538/yzk.2021.zhuankan.0208.
  3346. Chen, L.; Wang, P.; Bo, X.; Xue, X.-D.; Wang, C.-X.; Yang, Z.-X.; Jia, M.; Liu, J.-Y.; You, Q.; Sang, M.-J.; et al. Air Quality Impacts of Emissions from a Typical Iron and Steel Plant in Hebei Province during the Coronavirus Disease (COVID-19).

- Zhongguo Huanjing Kexue/China Environmental Science* **2021**, *41*, 3927–3933.
3347. Duan, W.-J.; Zhou, Y.; Li, J.-F.; Cheng, S.-Y.; Duan, R. PM2.5 Pollution Characteristics and Source Apportionment in Handan Urban Area. *Zhongguo Huanjing Kexue/China Environmental Science* **2019**, *39*, 4108–4116.
3348. Jin, D.-H.; Lu, H.-W. Effect of Electrode Materials on Degradation of Methylene Blue Wastewater by DBD Plasma under Parallel Magnetic Field. *Zhongguo Huanjing Kexue/China Environmental Science* **2020**, *40*, 1570–1576.
3349. Li, Z.-Y.; Bian, W.-B.; Hou, H.-Y.; Zhang, X.; Jiang, L.-J.; Sun, F.-Z.; Liu, Y.-S. Performance of CO Purification from Sintering Flue Gas by Copper-Manganese-Based Monolithic Catalyst. *Zhongguo Huanjing Kexue/China Environmental Science* **2022**, *42*, 4052–4058.
3350. Liu, Z.; Xu, C.-X.; Chen, J.-H.; Han, L.; Wang, B.; Xiong, W.-P.; Mei, L.-D. Emission Estimation and Component Characteristics of Volatile Organic Compounds in Typical Iron and Steel Enterprise. *Zhongguo Huanjing Kexue/China Environmental Science* **2020**, *40*, 4292–4303.
3351. Luo, Y.-F.; Wang, Y.-F.; Li, J.-J.; Yu, Z.-W.; Wei, J.-C.; Long, H.-M. Influence of Coking Coal Ratio on Emission Characteristics of Volatile Organic Compounds in Sintering Flue Gas. *Zhongguo Huanjing Kexue/China Environmental Science* **2021**, *41*, 4077–4084.
3352. Mao, X.-Q.; Xing, Y.-K.; Gao, Y.-B.; He, F.; Zeng, A.; Kuai, P.; Hu, T. Study on GHGs and Air Pollutants Co-Control: Assessment and Planning. *Zhongguo Huanjing Kexue/China Environmental Science* **2021**, *41*, 3390–3398.
3353. Tang, L.; Jia, M.; Bo, X.; Xue, X.-D.; Guo, J.; Tian, J.; Huang, M.-T.; Wang, T.; Cui, L.; Dong, G.-X. High Resolution Emission Inventory and Atmospheric Environmental Impact Research in Chinese Iron and Steel Industry. *Zhongguo Huanjing Kexue/China Environmental Science* **2020**, *40*, 1493–1506.
3354. Wei, N.; Liu, S.-N.; Li, G.-J.; Li, X.-C. Mitigation Potential Evaluation of CO<sub>2</sub> Capture and Storage in Crude Steel Industries of China. *Zhongguo Huanjing Kexue/China Environmental Science* **2021**, *41*, 5866–5874.
3355. Xu, X.-M.; Zong, S.-Y.; Liu, D. Bisphenol A Degradation by Base-Activated Persulfate Using Steel Slag. *Zhongguo Huanjing Kexue/China Environmental Science* **2019**, *39*, 2889–2895.
3356. Yang, D.-D.; Wang, T.-J.; Li, S.; Shu, L.; Xue, Z.-G.; Chai, F.-H. Urban PM2.5 Compliance Strategy Based on Air Quality and Mathematical Planning Model. *Zhongguo Huanjing Kexue/China Environmental Science* **2021**, *41*, 3493–3501.
3357. Yao, S.-Y.; Wei, W.; Shen, Z.-Y.; Wang, C.-D.; Niu, Y. Source Apportionment of Ozone Pollution in the Typical Steel Industry City of China in Summer. *Zhongguo Huanjing Kexue/China Environmental Science* **2021**, *41*, 37–48.
3358. Zhang, L.-A.; Diao, Y.-F.; Zhuang, J.-W.; Zhou, F.-S.; Shen, H.-G. The Mechanism of High Gradient Magnetic Field Improving the Performance of Single Fiber Capture PM2.5. *Zhongguo Huanjing Kexue/China Environmental Science* **2019**, *39*, 2765–2773.

3359. Zhang, Z.-C.; Xie, Y.-Q.; Zhang, Z.-J.; Gao, G.-S.; Xu, B.; Tian, X.; Xu, H.; Wei, Y.-T.; Shi, G.-L.; Feng, Y.-C. Source Apportionment and Seasonal Variation Characteristics of Atmospheric Dustfall in Taiyuan by Two Receptor Models. *Zhongguo Huanjing Kexue/China Environmental Science* **2022**, *42*, 2577–2586.
3360. Zhou, Y.-F.; Chen, M.-X.; Ding, J.-F.; Zhao, W.-R. VOCs Emission Characteristics of Color Steel Industry and Formation Potential of Ozone and Secondary Organic Aerosol. *Zhongguo Huanjing Kexue/China Environmental Science* **2019**, *39*, 1365–1370.
3361. Lü, X.; Wang, H.; Liu, Y.; Chen, S.; Sun, B. Study on Operating Performance and Indicator Diagram of Rod Pump Production System under Fault Conditions. *Zhongguo Shiyou Daxue Xuebao (Ziran Kexue Ban)/Journal of China University of Petroleum (Edition of Natural Science)* **2020**, *44*, 117–126, doi:10.3969/j.issn.1673-5005.2020.02.015.

**Disclaimer/Publisher's Note:** The statements, opinions and data contained in all publications are solely those of the individual author(s) and contributor(s) and not of MDPI and/or the editor(s). MDPI and/or the editor(s) disclaim responsibility for any injury to people or property resulting from any ideas, methods, instructions or products referred to in the content.
